# Supplementary material for: Phosphoproteomic mapping reveals distinct signaling actions and activation of muscle protein synthesis by Isthmin-1
Source: eLife journal article supplement (doi:10.7554/elife.80014), 2022-09-28
Supplement: data2 [file imputation_venn_diagram.xlsx]

## Sheet: Sheet1
MinProb	QRILC	man
Osbpl9	Sh3pxd2b	Osbpl9
Ddi2	Plxnb2	Ddi2
Map7d1.1	Dock5.2	Map7d1.1
Dock5.2	Tpr.3	Plxnb2
Tpr.3	Trip12.3	Dock5.2
Gtpbp1.2	Gtpbp1.2	Mfap1a.1
Eef2k	Eef2k	Bod1l.7
Akap2.2	Srpk2	Tpr.3
Ncam1.4	Akap2.2	Sipa1l3.1
Map1b.21	Septin7	Trip12.3
Zfp37	Psmc3	Gtpbp1.2
Rps6ka1.1	Ncam1.4	Eef2k
Vim.12	Map1b.21	Akap2.2
Dnm1	Zfp37	Psmc3
Yap1.3	Vim.2	Ncam1.4
Pla2g4a.3	Vim.5	Map1b.21
Rpl13	Vim.16	Zfp37
Lmna.15	Zfp36l1	Vim.12
Lmna.16	Ptpn1	Vim.16
Lmna.23	Ptpn1.1	Irs1.2
Camlg	Dnm1	Irs1.3
Cnbp	Pla2g4a.3	Irs1.5
Cnbp.2	Rpl13	Ptpn1
Tnks1bp1.24	Lmna.16	Ptpn1.1
Rps11	Lmna.23	Dnm1
Ybx1.5	Cnbp.2	Yap1.3
Nfic.3	Sh3bp1.3	Pla2g4a.1
Pkn1.2	Tubgcp3	Pla2g4a.3
Pebp1.1	Anks1a	Rpl13
Tp53bp1.5	Rps11	Lmna.16
Slc9a3r1.5	Ybx1.5	Lmna.23
Casp3	Nfic.3	Camlg
Rps3a.1	Pkn1.2	Plcb3
Rps3a.2	Pebp1.1	Cnbp.2
Mprip	Slc9a3r1.5	Stmn1.1
Hn1.1	Casp3	Sh3bp1.3
Rplp2	Rps3a.1	Tnks1bp1.24
Eif2ak2	Rps3a.2	Anks1a
Smarcad1.1	Mprip	Rps11
Relb	Hn1.1	Ybx1.5
Cdk18.1	Rplp2	Nfic.3
Ptpn2	Il6st	Pkn1.2
Smarca4.2	Eif2ak2	Pebp1.1
Prrc2c.3	Smarcad1.1	Tp53bp1.5
Micall2	Relb	Casp3
Yeats2.1	Smarca4.2	Irs2.5
Khsrp	Prrc2c.3	Rps3a.1
Edc4.5	Yeats2.1	Rps3a.2
Hdgfrp2.1	Khsrp	Mprip
Hdgfrp2.3	Edc4.5	Hn1.1
Zc3hav1.2	Hdgfrp2.1	Rplp2
Sorbs2.3	Hdgfrp2.3	Il6st
Vps51	Zc3hav1.2	Nfia
Abl2.2	Fcho2.7	Smarcad1.1
Oxr1.1	Sorbs2.3	Ptpn2
Arap1	Vps51	Smarca4.2
Phactr4.3	Abl2.2	Prrc2c.3
Gpkow.2	Oxr1.1	Micall2
Ppp1r13l	Phactr4.3	Yeats2.1
Zzef1	Ppp1r13l	Khsrp
Specc1.9	Zzef1	Zswim8.1
Scaf1.4	Specc1.9	Edc4.5
Grb10.2	Scaf1.4	Hdgfrp2.1
Pml	Sin3a.2	Hdgfrp2.3
Map3k3.1	Grb10.2	Zc3hav1.2
Nab1.2	Pml	Fcho2.7
Hspa4.1	Map3k3.1	Abl2.2
Pdcd4	Nab1.2	Oxr1.1
Pdcd4.1	Slc9a1	Arap1
Foxc2	Hspa4.1	Phactr4.3
Pcbp2.2	Atrx.1	Ppp1r13l
Ptpn21.7	Pdcd4	Zzef1
Sos1.2	Pdcd4.1	Specc1.9
Sh3gl1.1	Foxc2	Grb10.2
Tfe3.1	Pcbp2.2	Pml
Ptpn13	Sos1.2	Tmpo.2
Papd5	Sh3gl1.1	Map3k3.1
Rab3ip.3	Tfe3.1	Slc9a1
Fnip1	Ptpn13	Hspa4.1
Peak1.9	Papd5	Pdcd4
Larp4b.1	Rab3ip.3	Pdcd4.1
Arhgap21.3	Peak1.9	Foxc2
Tpm4	Kiaa0754	Pcbp2.2
Wdr44.2	Arhgap21.3	Ptpn21.6
Zc3h11a.1	Scap.1	Ptpn21.7
Smek1	Gpsm1	Sos1.2
Filip1l.1	Tpm4	Sh3gl1.1
Fkbp15.1	Rprd2.5	Tfe3.1
Fkbp15.4	Zc3h11a.1	Papd5
Txlna.2	Tonsl	Rab3ip
Papolg	Filip1l.1	Rab3ip.3
Papolg.1	Fkbp15.1	Cdk13.3
Phldb1.3	Fkbp15.4	Kiaa0754
Nup98	Papolg	Arhgap21.3
Fam21.8	Papolg.1	Tpm4
Maml1	Phldb1.3	Wdr44.2
Sbf1	Nup98	Zc3h11a.1
Tex2.1	Fam21.8	Smek1
Fam63a	Maml1	Smchd1
Twistnb	Sbf1	Fkbp15.1
Spag7	Tex2.1	Fkbp15.4
Mycbp2.1	Fam63a	Papolg.1
Fnbp1.1	Twistnb	Phldb1.3
Pum1.3	Spag7	Nup98
Usp6nl.1	Mycbp2.1	Fam21.8
Usp6nl.2	Clasp1.5	Maml1
Eif4g3.1	Fnbp1.1	Sbf1
Samd4b.2	Zfyve16.1	Tex2.1
Zc3hc1	Pum1.3	Fam63a
Mast4.4	Usp6nl.1	Twistnb
Vipas39	Eif4g3.1	Med26.1
Zc3h14.1	Zc3hc1	Spag7
Bnc2	Mast4.4	Mycbp2.1
Larp6.1	Pcyt1b	Prrc2a.3
Lmod1.2	Ehd2.1	Clasp1.5
Pkn2.4	Bnc2	Fnbp1.1
Rps6ka5	Larp6.1	Pum1.3
Frs2.5	Srrm2.8	Usp6nl.1
Septin11	Senp7	Eif4g3.1
Ank2	Pkn2.4	Rbbp8.1
Ank2.1	Rps6ka5	Zc3hc1
Dido1.1	Frs2.5	Mast4.4
Pabpn1.1	Ank2.1	Vipas39
Scyl2	Pabpn1.1	Psmf1.1
Pak2	Scyl2	Bnc2
Reep4	Pak2	Larp6.1
Lrrc41	Ahctf1.3	Cnpy4
Phldb2.2	Bclaf1.14	Lmod1.2
Phldb2.7	Samd14	Pkn2.4
Phldb2.8	Wipf1	Rps6ka5
Phldb2.11	Phldb2.2	Frs2.5
Phldb2.18	Phldb2.7	Frs2.6
Prkd3.1	Phldb2.8	Frs2.10
Mtmr3	Phldb2.11	Septin11
Ncapd2.1	Prkd3.1	Ank2
Svil.9	Pacs1.1	Ank2.1
Svil.13	Mtmr3	Pabpn1.1
Dlgap5	Dlgap5	Scyl2
Bfar	Zbtb44	Tns2.3
Pdlim2.6	Pdlim2.6	Fam193a.2
Dync1li1	Dync1li1	Pak2
Lrrc8c	Lrrc8c	Samd14
Prpsap2	Phip.3	Lrrc41
Phip.3	Psmd2	Phldb2.2
Psmd2	Ubap2	Phldb2.7
Gpsm2.2	Wasl.1	Phldb2.8
Pcdh18	Als2	Phldb2.11
Ubap2	AI597479	Phldb2.17
Wasl.1	Cic.12	Phldb2.18
AI597479	Sf3b1	Prkd3.1
Cic.12	Ankrd17.2	Coq9
Psip1.1	Rtn4.3	Pacs1.1
Txnrd3	Denr.1	Mtmr3
Sf3b1	Uqcrc1	Hacd3
Ankrd17.2	Mdm1	Mkl1
Rtn4.3	Pgam1	Dlgap5
Rbm7	Apbb2	Bfar
Uqcrc1	Ppp1r12a.2	Zbtb44
Mdm1	Klc4.1	Atf7
Ap2b1	Lima1.4	Pdlim2.6
Pgam1	Mapk8ip3	Znf830
Ppp1r12a.2	Grb14.1	Dync1li1
Osbpl3.4	Mink1.2	Spg20
Lima1.4	Asap1.5	Lrrc8c
Mapk8ip3	Kif21a	Prpsap2
Palld.1	Cbx8	Aspscr1.4
Grb14	Ulk2	Phip.3
Grb14.1	Mllt4.6	Psmd2
Mink1.2	Mllt4.9	Gatad2b.2
Asap1.5	Sorbs3.1	Ubap2
Acss2.1	Tfeb	Wasl.1
Kif21a	Nfkb2.1	AI597479
Cbx8	Itsn1.2	Cic.12
Mllt4.6	Mettl1	Psip1.1
Mllt4.9	Hnrnpc.1	Txnrd3
Sorbs3.1	Hdac5	Erc1
Nfkb2.1	Ice1.4	Sf3b1
Akap12.2	Tpr.4	Ankrd17.2
Ncor2.5	Tnk2.2	Uqcrc1
Itsn1.2	Wiz.9	Mdm1
Bag6	Psmc3.1	Toe1
Hnrnpc.1	F11r.2	Nop56.3
Epb41l1.4	Eno1.2	Ap2b1
Ice1.4	Marcks.9	Pgam1
Tpr.4	Kif4.2	Apbb2
Wiz.9	Tnks1bp1.40	Ppp1r12a.2
Psmc3.1	Irs2.9	Lima1.4
F11r.2	Tle3.2	Palld.1
Marcks.9	Fam117b	Isyna1
Pola2.2	Cobll1.16	Grb14.1
Ptpn12.13	Mdc1.3	Mink1.2
Tnks1bp1.40	Ktn1.3	Asap1.5
Irs2.9	Kif11	Son
Tle3.2	Fam21.14	Acss2.1
Cobll1.16	Kirrel.3	Kif21a
Mdc1.3	Htatsf1.3	Cbx8
Ktn1.3	Mia3.13	Mllt4.6
Kif11	Utp15.1	Mllt4.9
Mff.2	Basp1.4	Sorbs3.1
Fam21.14	Baz2a.2	Akap12.2
Snd1.1	Dst.12	Tnip1.1
Htatsf1.3	Cttnbp2nl.5	Itsn1.2
Mia3.13	Sf3b1.4	Hnrnpc.1
Hirip3.2	Raver1.6	Ice1.4
Rtkn.5	Snx2.5	Wiz.9
Utp15.1	Tmem55a	Psmc3.1
Basp1.4	Akt1s1.3	Map1b.42
Baz2a.2	Phkg2	Eno1.2
Dst.12	Rai14.5	Marcks.9
Sf3b1.4	Stk3.3	Kif4.2
Raver1.6	Map1a.19	Pola2.2
Snx2.5	Insr	Ptpn12.13
Steap1.1	Axl	Rangap1.5
Tmem55a	Epha2.2	Cast.17
Akt1s1.3	Frs2.15	Tnks1bp1.40
Phkg2	Ccdc9b.2	Irs2.9
Stk3.3	Bin1.7	Tle3.2
Map1a.19	Bin1.8	Cobll1.16
Insr	Tspyl1.3	Mdc1.3
Axl	Tspyl1.4	Ktn1.3
Epha2.2	Tln1.8	Prkab2.2
Ccdc9b.2	Tln1.9	Fam21.14
Bin1.7	Usp10.4	Snd1.1
Bin1.8	Usp10.5	Luc7l2
Tspyl1.3	Stmn1.3	Mia3.13
Tspyl1.4	Stmn1.4	Flna.19
Tln1.8	Tnks1bp1.45	Rtkn.5
Tln1.9	Srsf3.1	Utp15.1
Fosl2.3	Srsf3.2	Basp1.4
Usp10.4	Mprip.10	Baz2a.2
Usp10.5	Mprip.11	Dst.12
Stmn1.3	Larp7.2	Sf3b1.4
Stmn1.4	Larp7.3	Raver1.6
Tnks1bp1.45	Champ1.17	Snx2.5
Srsf3.1	Svil.21	Tmem55a
Srsf3.2	Fam129b.10	Akt1s1.3
Mprip.10	Ripply3	Phkg2
Mprip.11	Ripply3.1	Rai14.5
Larp7.2	Xpo6	Stk3.3
Larp7.3	Ptms.3	Map1a.19
Patl1.1	Pcm1.8	Ehmt2.1
Prrc2c.8	Pcm1.9	Axl
Trim56.4	Pcm1.10	Epha2.2
Fnbp1l.5	Noc2l	Ccdc9b.2
Champ1.17	Emg1.3	Setd1a.4
Fam129b.10	Hist1h1d.4	Bin1.7
Slco3a1	Cast.24	Bin1.8
Ripply3	Mapk1.2	Tspyl1.4
Ripply3.1	Mapk1.3	Tln1.8
Xpo6	Larp7.4	Tln1.9
Ptms.2	Cfap52.1	Hsf1.3
Ptms.3	Mapk3.2	Foxk1.4
Plec.11	Slco3a1.1	Usp10.4
Pcm1.8	Xpo6.2	Usp10.5
Pcm1.9	Mapk1.4	Stmn1.3
Pcm1.10	Mapk3.3	Stmn1.4
Emg1.3	Znf488	Tnks1bp1.45
Ctnna1.6		Rps6.1
Tnks1bp1.55		Srsf3.1
Mapk1.2		Srsf3.2
Mapk1.3		Mprip.10
Larp7.4		Mprip.11
Cfap52.1		Larp7.2
Mapk3.2		Patl1.1
Slco3a1.1		Prrc2c.8
Xpo6.2		Ndrg1.3
Sf3b1.9		Gigyf2.10
Dclk1.13		Trim56.4
Mllt4.17		Srrm2.67
Mapk1.4		Fnbp1l.5
Mapk3.3		Phldb2.33
Zc3hav1.12		Fam129b.10
Znf488		Slco3a1
Znf488.1		Ripply3
Gatad2a.5		Ripply3.1
Mamstr.2		Xpo6
Znf488.2		Rragc.4
		Ptms.2
		Ptms.3
		Plec.11
		Pcm1.8
		Pcm1.9
		Pcm1.10
		Cast.24
		Tnks1bp1.55
		Mapk1.2
		Mapk1.3
		Larp7.4
		Cfap52.1
		Mapk3.2
		Xpo6.2
		Dclk1.13
		Mllt4.17
		Mapk1.4
		Mapk3.3
		Zc3hav1.12
		Znf488
		Znf488.1
		Gatad2a.5
		Znf488.2
