# Supplementary material for: Phosphoproteomic mapping reveals distinct signaling actions and activation of muscle protein synthesis by Isthmin-1
Source: eLife journal article supplement (doi:10.7554/elife.80014), 2022-09-28

## qq-plots of normalized data

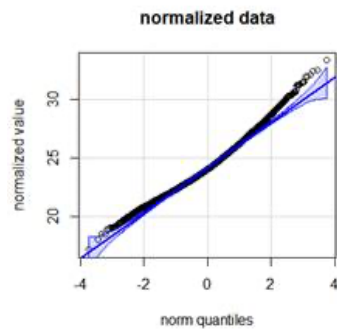

## qq-plots of normalized and log2 transformed data

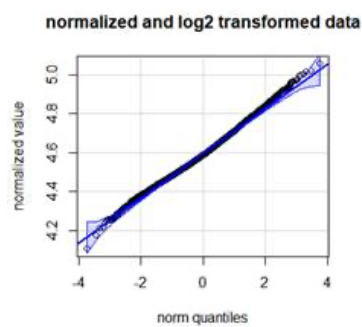

## Boxplot of all phosphopeptides

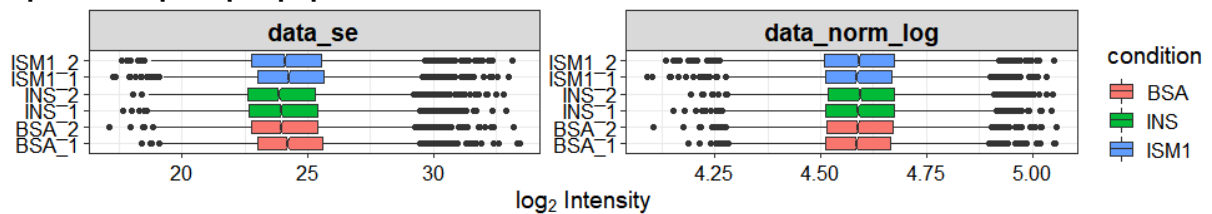

Figure A:

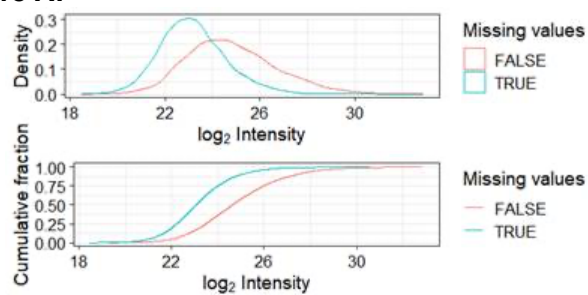

**Figure B:**

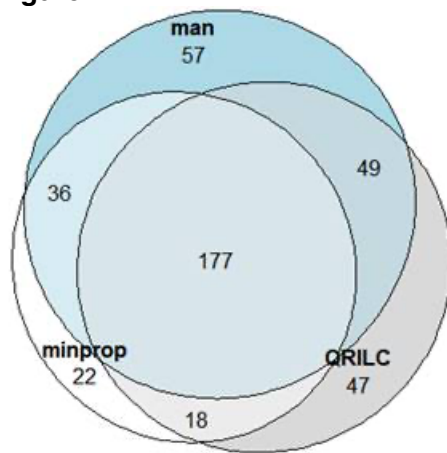

Supplement: data2 [file Source data 2 figures .pdf › Source data 2/Source data 2 figures .pdf]
