# Supplementary material for: Phosphoproteomic mapping reveals distinct signaling actions and activation of muscle protein synthesis by Isthmin-1
Source: eLife. 2022 Sep 28;11:e80014. doi: 10.7554/eLife.80014 (PMC9592085; doi:10.7554/eLife.80014)
Supplement: Figure 1—source data 1. [file elife-80014-fig1-data1.xlsx]

## Sheet: sig_ISMvsBSA_log_filter
proteins	protein	prot_name	gene	aa	pos	pval	padjval	fc	BSA_1	BSA_2	INS_1	INS_2	ISM1_1	ISM1_2
Q8K039	Q8K039	Uncharacterized protein KIAA1143 homolog	1110059G10Rik	S	50	0.966313	0.953685	-0.000718223	1	0.991667	0.968383	1	0.99234	0.997187
Q3TEI4	Q3TEI4	Uncharacterized protein C15orf39 homolog	1700017B05Rik	S	493	0.419427	0.912475	-0.0529541	0.964739	1	0.894597	0	0.860903	0.878928
Q3TEI4	Q3TEI4	Uncharacterized protein C15orf39 homolog	1700017B05Rik	S	494	0.414675	0.91281	-0.0529541	0.964739	1	0.894597	0	0.860903	0.878928
Q8K207	Q8K207	Uncharacterized protein C1orf21 homolog	1700025G04Rik	S	93	0.635523	0.936556	-0.0508312	0	1	0	0	0.875535	0
Q8K207	Q8K207	Uncharacterized protein C1orf21 homolog	1700025G04Rik	S	95	0.103923	0.712052	-0.115856	0.912288	0.888267	1	0.952818	0	0.822391
Q8K207	Q8K207	Uncharacterized protein C1orf21 homolog	1700025G04Rik	S	115	0.796676	0.946518	0.0042575	0.980766	0.9759	0.989389	0.977962	1	0.970955
Q922C1	Q922C1	Uncharacterized protein C19orf44 homolog	1700030K09Rik	S	196	0.63682	0.937114	0.0214552	0	1	0	0	0.875493	0.951816
Q99M08	Q99M08	Uncharacterized protein C4orf3 homolog	1810037I17Rik	S	19	0.939533	0.952691	0.00354569	0.811363	0.773665	0.814759	1	0.817488	0.778822
Q8C3W1	Q8C3W1	Uncharacterized protein C1orf198 homolog	2310022B05Rik	S	176	0.546888	0.929089	-0.117617	0.924042	0.848503	0.969082	0	0	1
Q9CWU4	Q9CWU4	UPF0690 protein C1orf52 homolog	2410004B18Rik	S	156	0.90585	0.951382	0.00186057	0.984275	0.982227	0.985445	1	0.981243	0.990058
Q8CIL4	Q8CIL4	Uncharacterized protein C1orf131 homolog	2810004N23Rik	S	7	0.884763	0.950518	0.00304124	1	0.930383	0.991505	0.99886	0.970247	0.97072
Q8CIL4	Q8CIL4	Uncharacterized protein C1orf131 homolog	2810004N23Rik	S	9	0.00764367	0.00910908	-0.138962	0.921095	1	0	0	0	0
Q8CIL4	Q8CIL4	Uncharacterized protein C1orf131 homolog	2810004N23Rik	S	67	0.484824	0.922814	0.0135164	0.957962	0.942734	1	0.954643	0.98362	0.962692
Q8CIL4	Q8CIL4	Uncharacterized protein C1orf131 homolog	2810004N23Rik	S	106	0.651132	0.937485	-0.0296691	0	0.873969	1	0.980278	0.851831	0
Q9CXL3	Q9CXL3	Uncharacterized protein C7orf50 homolog	3110082I17Rik	S	177	0.908495	0.950899	0.00841881	0.968749	0	0	0	0	1
Q9CXL3	Q9CXL3	Uncharacterized protein C7orf50 homolog	3110082I17Rik	S	180	0.921313	0.951812	0.00435946	0.968749	0	0	0	0	1
Q9CXL3	Q9CXL3	Uncharacterized protein C7orf50 homolog	3110082I17Rik	S	48	0.230393	0.860831	0.0444002	0.979728	0.884661	0.876178	0.956218	0.998187	1
Q9Z2Q6	Q9Z2Q6	Septin5	44079	S	225	0.643787	0.93745	-0.00706321	1	0.994959	0.970851	0.97472	0.988749	0.988427
Q9Z2Q6	Q9Z2Q6	Septin5	44079	S	327	0.350273	0.90097	-0.0165954	0.986379	0.980866	0.984327	1	0.940143	0.971084
Q8K2W9	Q8K2W9	Uncharacterized protein C14orf93 homolog	4931414P19Rik	S	226	0.806512	0.946017	-0.01257	0.89599	0	1	0.796999	0.950208	0
Q8C5V8	Q8C5V8	NA	4932418E24Rik	T	2	0.297428	0.887064	0.0516877	0.80702	0.949945	0.959542	0.961685	1	0.905216
Q8C5V8	Q8C5V8	NA	4932418E24Rik	T	3	0.931854	0.951891	-0.0152678	0	0.977923	1	0.94152	0	0.943383
Q3UE31	Q3UE31	Uncharacterized protein KIAA0930 homolog	5031439G07Rik	S	324	0.598393	0.933985	-0.00863934	1	0.985146	0.971563	0.983707	0.987774	0.969503
Q3UE31	Q3UE31	Uncharacterized protein KIAA0930 homolog	5031439G07Rik	S	362	0.524094	0.92777	-0.0290592	0.898824	0.982365	0	0	0.737085	1
Q3UE31	Q3UE31	Uncharacterized protein KIAA0930 homolog	5031439G07Rik	T	293	0.206272	0.847047	-0.0520965	0.922294	1	0.992556	0.993422	0.94125	0.800225
Q8BH50	Q8BH50	Uncharacterized protein C18orf25 homolog	8030462N17Rik	S	66	0.516602	0.926366	-0.0245647	0.900081	1	0.869148	0.831297	0.854837	0.963919
Q8BH50	Q8BH50	Uncharacterized protein C18orf25 homolog	8030462N17Rik	S	67	0.423668	0.914921	0.0987108	0.943335	0	0.814857	1	0.918219	0.800969
P41233	P41233	ATP-binding cassette sub-family A member 1	Abca1	S	1296	0.85649	0.948243	0.00205932	0.9589	0	0	0	0	1
O35379	O35379	Multidrug resistance-associated protein 1	Abcc1	S	289	0.141538	0.787111	-0.030939	0.992058	0.996983	0.965696	1	0.946465	0.960679
O35379	O35379	Multidrug resistance-associated protein 1	Abcc1	S	290	0.0510488	0.471295	-0.261484	0.73861	1	0	0.832999	0	0
O35379	O35379	Multidrug resistance-associated protein 1	Abcc1	S	882	0.692707	0.940439	0.0344624	0.826156	0	0	0.945127	1	0.621863
Q9R1X5	Q9R1X5	Multidrug resistance-associated protein 5	Abcc5	S	509	0.174275	0.823209	-0.0256972	0.92542	0.917543	1	0.958625	0.850352	0.872538
Q6P542	Q6P542	ATP-binding cassette sub-family F member 1	Abcf1	S	138	0.968527	0.953764	-0.00100661	0.997722	0.94594	0.951453	0.990562	0.940533	1
Q6P542	Q6P542	ATP-binding cassette sub-family F member 1	Abcf1	S	225	0.945803	0.952929	0.0012714	0.974733	0.995267	0.995757	0.970086	0.973491	1
Q6P542	Q6P542	ATP-binding cassette sub-family F member 1	Abcf1	S	613	0.264249	0.876416	-0.0941757	0.782151	1	0.864427	0.915856	0	0.880547
Q6P542	Q6P542	ATP-binding cassette sub-family F member 1	Abcf1	S	103	0.744623	0.943784	-0.0146276	0.917852	1	0.891937	0.994842	0.891357	0.985372
Q6P542	Q6P542	ATP-binding cassette sub-family F member 1	Abcf1	S	107	0.794036	0.946388	-0.00397534	0.998504	0.996529	0.992543	1	0.99124	0.994245
Q6P542	Q6P542	ATP-binding cassette sub-family F member 1	Abcf1	S	103	0.447733	0.918006	0.0213197	0.982906	0.905572	0.885513	0.955595	1	0.964621
Q6P542	Q6P542	ATP-binding cassette sub-family F member 1	Abcf1	S	107	0.447733	0.918006	0.0213197	0.982906	0.905572	0.885513	0.955595	1	0.964621
Q7TMS5	Q7TMS5	ATP-binding cassette sub-family G member 2	Abcg2	S	13	0.0912353	0.681939	-0.0308379	0.999995	1	0.924985	0.918294	0.941387	0.940635
Q8CBW3	Q8CBW3	Abl interactor 1	Abi1	S	296	0.839764	0.947852	-0.00544928	0.984096	0.72467	0	0	1	0
Q8CBW3	Q8CBW3	Abl interactor 1	Abi1	S	222	0.505295	0.925168	0.0132109	0.932747	0.997243	0.944394	0.952108	1	0.98326
P62484	P62484	Abl interactor 2	Abi2	S	301	0.904018	0.951193	0.0106658	0.886623	0.917898	0	1	0.88117	0.967228
Q4JIM5	Q4JIM5	Abelson tyrosine-protein kinase 2	Abl2	S	632	0.140818	0.785779	-0.0453275	0.95406	1	0.880271	0.860142	0.861925	0.945373
Q4JIM5	Q4JIM5	Abelson tyrosine-protein kinase 2	Abl2	S	936	0.408996	0.912038	0.0315561	0	0	0.974343	1	0	0.79017
Q8K4G5	Q8K4G5	Actin-binding LIM protein 1	Ablim1	S	215	0.15544	0.805467	-0.133042	1	0	0	0.70809	0	0
Q8K4G5	Q8K4G5	Actin-binding LIM protein 1	Ablim1	S	670	0.247915	0.86908	-0.0747681	0.960664	0.990529	0.995755	1	0.982517	0.657743
Q8K4G5	Q8K4G5	Actin-binding LIM protein 1	Ablim1	S	671	0.112444	0.737554	0.0293948	0.89981	0.920298	1	0.997886	0.960835	0.971019
Q8K4G5	Q8K4G5	Actin-binding LIM protein 1	Ablim1	S	496	0.875634	0.949551	0.00634115	0.963774	0	0	0	0	1
Q8K4G5	Q8K4G5	Actin-binding LIM protein 1	Ablim1	S	475	0.504207	0.925069	0.0106065	0.988515	0.979426	0.979765	0.992466	1	0.999865
Q5SWU9	Q5SWU9	Acetyl-CoA carboxylase 1;Biotin carboxylase	Acaca	S	23	0.315739	0.892324	-0.157908	0.994887	1	0	0.952773	0.996421	0
Q5SWU9	Q5SWU9	Acetyl-CoA carboxylase 1;Biotin carboxylase	Acaca	S	25	0.412185	0.911859	0.101866	0	0	1	0	0	0.983448
Q5SWU9	Q5SWU9	Acetyl-CoA carboxylase 1;Biotin carboxylase	Acaca	S	29	0.604634	0.934482	-0.00904603	0.993854	1	0.977425	0.949057	0.991788	0.97634
Q5SWU9	Q5SWU9	Acetyl-CoA carboxylase 1;Biotin carboxylase	Acaca	S	79	0.467495	0.920621	-0.0490552	1	0.943353	0.958984	0.742785	0.960851	0.838825
Q5SWU9	Q5SWU9	Acetyl-CoA carboxylase 1;Biotin carboxylase	Acaca	S	23	0.16221	0.811446	0.0342333	0.905456	0.964396	0.939429	0.978277	0.986511	1
Q5SWU9	Q5SWU9	Acetyl-CoA carboxylase 1;Biotin carboxylase	Acaca	S	25	0.113784	0.736547	0.101105	0.717407	0	0	0	1	0.738162
Q5SWU9	Q5SWU9	Acetyl-CoA carboxylase 1;Biotin carboxylase	Acaca	S	29	0.179387	0.827503	0.0300483	0.919718	0.964396	0.939429	0.978277	0.986511	1
Q5SWU9	Q5SWU9	Acetyl-CoA carboxylase 1;Biotin carboxylase	Acaca	S	1258	0.366524	0.904188	0.176889	0	0.987965	0	0.937415	1	0.953464
Q5SWU9	Q5SWU9	Acetyl-CoA carboxylase 1;Biotin carboxylase	Acaca	S	1262	0.365588	0.904112	0.177126	0	0.987965	0	0.937415	1	0.953464
Q5XG73	Q5XG73	Acyl-CoA-binding domain-containing protein 5	Acbd5	S	421	0.671302	0.939326	-0.0194579	0.921829	0.934581	0.823254	1	0.992822	0.768708
Q5XG73	Q5XG73	Acyl-CoA-binding domain-containing protein 5	Acbd5	S	418	0.671302	0.939326	-0.0194579	0.921829	0.934581	0.823254	1	0.992822	0.768708
Q9JIX8	Q9JIX8	Apoptotic chromatin condensation inducer in the nucleus	Acin1	S	413	0.330489	0.896299	-0.0193371	0.98519	1	0.974549	0.9277	0.965865	0.955969
Q9JIX8	Q9JIX8	Apoptotic chromatin condensation inducer in the nucleus	Acin1	S	838	0.556603	0.930368	0.011205	0.954483	1	0.981349	0.986065	0.990068	0.998662
Q9JIX8	Q9JIX8	Apoptotic chromatin condensation inducer in the nucleus	Acin1	S	1003	0.0592631	0.533275	0.0479285	0.92324	0.91343	0.963289	0.924947	0.970016	1
Q9JIX8	Q9JIX8	Apoptotic chromatin condensation inducer in the nucleus	Acin1	T	417	0.853395	0.948904	0.0158907	0.828021	0	0	0	1	0
Q9JIX8	Q9JIX8	Apoptotic chromatin condensation inducer in the nucleus	Acin1	T	840	0.389487	0.908284	-0.0267299	1	0	0.995191	0	0	0
Q9JIX8	Q9JIX8	Apoptotic chromatin condensation inducer in the nucleus	Acin1	S	479	0.552282	0.929714	0.068878	0.889825	0.822084	0	0.917936	1	0.942798
Q9JIX8	Q9JIX8	Apoptotic chromatin condensation inducer in the nucleus	Acin1	S	491	0.584318	0.932443	0.068878	0.889825	0.822084	0	0.973178	1	0.942798
Q9JIX8	Q9JIX8	Apoptotic chromatin condensation inducer in the nucleus	Acin1	S	387	0.2424	0.866521	-0.134247	0.986035	0.998278	0	0.645768	1	0
Q9JIX8	Q9JIX8	Apoptotic chromatin condensation inducer in the nucleus	Acin1	S	389	0.242015	0.866874	-0.135965	0.986035	0.998278	0	0.645768	1	0
Q9JIX8	Q9JIX8	Apoptotic chromatin condensation inducer in the nucleus	Acin1	S	391	0.243436	0.867237	-0.13582	0.986035	0.998278	0	0.645768	1	0
Q9JIX8	Q9JIX8	Apoptotic chromatin condensation inducer in the nucleus	Acin1	S	710	0.393294	0.909463	-0.0217221	0.937779	0.912788	1	0.921612	0.906033	0.869899
Q9JIX8	Q9JIX8	Apoptotic chromatin condensation inducer in the nucleus	Acin1	S	729	0.321104	0.893315	0.217214	0	0.716416	0	0.98278	0.693127	1
Q9JIX8	Q9JIX8	Apoptotic chromatin condensation inducer in the nucleus	Acin1	S	479	0.892566	0.950843	0.00207564	0.985542	0.992092	1	0.999757	0.985933	0.997465
Q9JIX8	Q9JIX8	Apoptotic chromatin condensation inducer in the nucleus	Acin1	S	491	0.178519	0.826874	0.025487	0.960688	0.911863	0.976963	0.976333	0.993351	1
Q9JIX8	Q9JIX8	Apoptotic chromatin condensation inducer in the nucleus	Acin1	S	387	0.818309	0.947289	0.0353987	0	0.855023	0	0.954515	0	1
Q9JIX8	Q9JIX8	Apoptotic chromatin condensation inducer in the nucleus	Acin1	S	389	0.815793	0.947448	-0.00354804	0.986453	0.995573	1	0.993227	0.983803	0.986638
Q9JIX8	Q9JIX8	Apoptotic chromatin condensation inducer in the nucleus	Acin1	S	216	0.160021	0.806135	0.207605	0	0	0	0.992357	0.689409	1
P56485	P56485	Atypical chemokine receptor 3	Ackr3	S	347	0.818615	0.947576	0.0224811	1	0.627313	0.918394	0.9732	0.749501	0.950387
P56485	P56485	Atypical chemokine receptor 3	Ackr3	S	350	0.410481	0.912407	-0.0187226	0.981799	1	0.981026	0.986035	0.918403	0.995088
P56485	P56485	Atypical chemokine receptor 3	Ackr3	T	352	0.92315	0.951362	0.000578577	0	0.971069	0	0.894384	0	1
Q91V92	Q91V92	ATP-citrate synthase	Acly	S	455	0.250531	0.87027	0.0210832	0.940513	0.917776	1	0.990334	0.951307	0.972853
O55137;Q9QYR7;Q32Q92;Q8BWN8;Q6Q2Z6	O55137	Acyl-coenzyme A thioesterase 1;Acyl-coenzyme A thioesterase 3;Acyl-coenzyme A thioesterase 6;Acyl-coenzyme A thioesterase 4;Acyl-coenzyme A thioesterase 5	Acot1;Acot3;Acot6;Acot4;Acot5	S	56;67;56;56;56	0.0723463	0.60759	-0.0354954	0.989087	1	0.949102	0.959639	0.933194	0.948014
O55137	O55137	Acyl-coenzyme A thioesterase 1	Acot1	S	416	0.0416078	0.384188	-0.0794536	1	0.895408	0.836955	0.777553	0.812978	0.801962
Q8VHQ9	Q8VHQ9	Acyl-coenzyme A thioesterase 11	Acot11	T	323	0.150847	0.798569	0.0533243	0.797351	0.887427	1	0.918885	0.920219	0.930106
Q9QXG4	Q9QXG4	Acetyl-coenzyme A synthetase, cytoplasmic	Acss2	S	263	0.17783	0.826154	-0.0294769	0.966845	1	0.926618	0.884725	0.944787	0.914655
Q9QXG4	Q9QXG4	Acetyl-coenzyme A synthetase, cytoplasmic	Acss2	S	267	0.0011193	1.99464e-07	-0.209476	0.98441	1	0	0	0	0
Q9QXG4	Q9QXG4	Acetyl-coenzyme A synthetase, cytoplasmic	Acss2	S	30	0.869754	0.949882	-0.00431429	1	0.985693	0.940393	0.840446	0.974173	0.996441
P60710;P63260	P63260	Actin, cytoplasmic 1;Actin, cytoplasmic 1, N-terminally processed;Actin, cytoplasmic 2;Actin, cytoplasmic 2, N-terminally processed	Actb;Actg1	S	232;232	0.504967	0.925183	0.0709384	0.803313	0	0	0.994325	1	0.677732
P60710;P63260	P63260	Actin, cytoplasmic 1;Actin, cytoplasmic 1, N-terminally processed;Actin, cytoplasmic 2;Actin, cytoplasmic 2, N-terminally processed	Actb;Actg1	S	233;233	0.58524	0.932877	-0.0341538	1	0.99356	0.979152	0.683228	0.889916	0.974666
P60710;P63260	P63260	Actin, cytoplasmic 1;Actin, cytoplasmic 1, N-terminally processed;Actin, cytoplasmic 2;Actin, cytoplasmic 2, N-terminally processed	Actb;Actg1	S	234;234	0.677049	0.9387	-0.0154126	0	1	0	0	0	0.932313
O88990;P57780;Q9JI91;Q7TPR4	P57780	Alpha-actinin-3;Alpha-actinin-4;Alpha-actinin-2;Alpha-actinin-1	Actn3;Actn4;Actn2;Actn1	S	153;160;147;140	0.205459	0.846622	-0.0258406	0.987822	0.972775	0.979619	1	0.923436	0.959171
Q9QZB7	Q9QZB7	Actin-related protein 10	Actr10	S	414	0.221723	0.856142	-0.152136	0.921776	1	0.970446	0.917077	0.959076	0.315212
Q9Z0F8	Q9Z0F8	Disintegrin and metalloproteinase domain-containing protein 17	Adam17	S	794	0.474673	0.92158	-0.0132749	0.98588	0.999016	1	0.977923	0.956811	0.988402
Q9Z0F8	Q9Z0F8	Disintegrin and metalloproteinase domain-containing protein 17	Adam17	T	735	0.131274	0.768159	-0.0478852	0.759475	0	0.992655	1	0	0
Q811B3	Q811B3	A disintegrin and metalloproteinase with thrombospondin motifs 12	Adamts12	Y	620	0.207037	0.846163	-0.131223	1	0.868885	0.899169	0	0.848014	0
P59509	P59509	A disintegrin and metalloproteinase with thrombospondin motifs 19	Adamts19	T	8	0.0836811	0.644298	-0.219507	1	0.495962	0	0.555422	0.184838	0
Q01341	Q01341	Adenylate cyclase type 6	Adcy6	S	573	0.0196726	0.11098	-0.11915	1	0.837506	0.777388	0.73117	0.691295	0.670509
Q01341	Q01341	Adenylate cyclase type 6	Adcy6	S	53	0.594511	0.933668	0.01301	0.892427	0.91991	0.941366	1	0.954172	0.900678
P51829	P51829	Adenylate cyclase type 7	Adcy7	S	516	0.512971	0.9242	0.0434485	0	0	1	0	0	0.967423
P51829	P51829	Adenylate cyclase type 7	Adcy7	T	513	0.493469	0.923666	0.0450942	0	0	1	0	0	0.967423
Q9QYC0	Q9QYC0	Alpha-adducin	Add1	S	12	0.461726	0.919951	-0.0115397	0.929719	0.93909	0.995059	1	0.915685	0.914539
Q9QYC0	Q9QYC0	Alpha-adducin	Add1	S	586	6.08237e-05	3.65357e-14	-0.357068	0.949052	0.971087	1	0.958943	0.236287	0.138611
Q9QYC0	Q9QYC0	Alpha-adducin	Add1	S	436	0.0811535	0.645579	-0.068016	0.999906	1	0.962691	0.93086	0.951866	0.83904
Q9QYC0	Q9QYC0	Alpha-adducin	Add1	T	610	0.260838	0.874563	0.138415	0.954399	0	0.815216	0.815763	0.872423	1
Q9QYC0	Q9QYC0	Alpha-adducin	Add1	S	613	0.118722	0.749754	0.0828806	0.836821	0.803804	0.795696	0.991214	1	0.937234
Q9QYC0	Q9QYC0	Alpha-adducin	Add1	T	610	0.183571	0.831463	0.129914	0.844239	0	0.802749	1	0.913796	0.872624
Q9QYC0	Q9QYC0	Alpha-adducin	Add1	T	614	0.595336	0.933178	0.0626844	0.836821	0.803804	0	0.991214	1	0.864957
Q9QYB5	Q9QYB5	Gamma-adducin	Add3	S	681	0.0340951	0.299336	0.0707715	0.91329	0.815182	0.929858	0.909695	1	0.998596
Q9QYB5	Q9QYB5	Gamma-adducin	Add3	T	11	0.41872	0.913687	-0.0375906	1	0.953314	0.966943	0.725794	0.825258	0.948278
Q9Z103	Q9Z103	Activity-dependent neuroprotector homeobox protein	Adnp	S	904	0.592141	0.932915	0.0269637	0.997764	0	0.977638	1	0.944922	0.866107
P46664	P46664	Adenylosuccinate synthetase isozyme 2	Adss	S	2	0.722571	0.942195	0.0213902	0.847809	0.886259	0.820064	0	1	0.824348
P46664	P46664	Adenylosuccinate synthetase isozyme 2	Adss	S	4	0.399841	0.910506	0.0709217	0	0	0	0.936444	0	1
Q9Z248	Q9Z248	Zinc finger protein AEBP2	Aebp2	S	199	0.46507	0.920308	-0.0467012	0.878122	1	0.977147	0.763359	0.97208	0.695072
Q80YS6	Q80YS6	Actin filament-associated protein 1	Afap1	S	283	0.114378	0.737985	-0.0570987	0.945868	0.977899	1	0	0	0
Q80YS6	Q80YS6	Actin filament-associated protein 1	Afap1	S	666	0.050257	0.468612	0.252375	0	0	0	0.882229	1	0.827162
Q80YS6	Q80YS6	Actin filament-associated protein 1	Afap1	S	669	0.036738	0.331492	-0.280023	1	0.903923	0.945616	0	0	0
Q9ESC8	Q9ESC8	AF4/FMR2 family member 4	Aff4	S	1055	0.0166375	0.0711082	-0.191678	0.996093	1	0.908619	0	0	0
Q9ESC8	Q9ESC8	AF4/FMR2 family member 4	Aff4	S	1040	0.141384	0.78685	0.0323457	0.951633	0.894342	0.95844	0.920473	0.98704	1
Q80WT5	Q80WT5	Aftiphilin	Aftph	S	151	0.835762	0.948381	0.00315859	0.999524	0.987074	0.997079	0.995565	0.997479	1
Q8BXK8	Q8BXK8	Arf-GAP with GTPase, ANK repeat and PH domain-containing protein 1	Agap1	T	836	0.00916094	0.0155556	-0.114785	1	0.910749	0.829113	0.874374	0.70561	0
Q8CDK2	Q8CDK2	Cytosolic carboxypeptidase 2	Agbl2	S	730	0.285281	0.883094	-0.162548	0.93095	0.938845	1	0.854445	0	0.971175
Q8CDK2	Q8CDK2	Cytosolic carboxypeptidase 2	Agbl2	Y	727	0.434514	0.91609	-0.0565537	0.93095	0.938845	1	0.854445	0.724174	0.971175
Q8K2K6	Q8K2K6	Arf-GAP domain and FG repeat-containing protein 1	Agfg1	S	181	0.242879	0.866794	-0.0337774	0.980901	0.973923	0.990899	1	0.875225	0.970664
Q8K2K6	Q8K2K6	Arf-GAP domain and FG repeat-containing protein 1	Agfg1	T	323	0.746379	0.94386	0.0112735	0.968185	0	0.737234	0	1	0.815102
Q8CJG0	Q8CJG0	Protein argonaute-2	Ago2	S	11	0.186849	0.841543	-0.0599862	1	0	0.849959	0.862271	0	0.67838
Q8CJG0	Q8CJG0	Protein argonaute-2	Ago2	S	386	0.570692	0.930741	0.0589097	0.741206	0	0	0	0	1
Q8CJG0	Q8CJG0	Protein argonaute-2	Ago2	S	388	0.152041	0.800014	0.0502888	0.932069	0.83296	0.938193	0.999063	1	0.943327
Q8C0N2	Q8C0N2	Glycerol-3-phosphate acyltransferase 3	Agpat9	S	68	0.699705	0.94115	0.0156362	1	0.742561	0.871833	0.83685	0.897593	0.92501
Q8C0I1	Q8C0I1	Alkyldihydroxyacetonephosphate synthase, peroxisomal	Agps	S	57	0.172452	0.819313	-0.103107	0.888901	1	0	0.868204	0	0.833327
Q641K1	Q641K1	Cytosolic carboxypeptidase 1	Agtpbp1	S	319	0.143545	0.789282	-0.0642323	1	0.89408	0.903927	0.905143	0.886906	0.860515
Q8CJF7	Q8CJF7	Protein ELYS	Ahctf1	S	528	0.592546	0.933505	0.0137484	0.918132	0.932539	0.95338	0.980974	0.901662	1
Q8CJF7	Q8CJF7	Protein ELYS	Ahctf1	S	1507	0.985891	0.954383	-0.00160932	0.888187	0.949108	1	0	0.90153	0.929289
Q8CJF7	Q8CJF7	Protein ELYS	Ahctf1	S	2185	0.348383	0.900414	-0.106794	0	0.839623	1	0	0	0
Q8CJF7	Q8CJF7	Protein ELYS	Ahctf1	S	2188	0.00226024	3.06267e-05	0.162116	0	0	0	0	1	0.933432
Q8CJF7	Q8CJF7	Protein ELYS	Ahctf1	S	1138	0.951889	0.953156	0.000998026	0.984196	0.983137	0.993284	0.980115	1	0.970649
Q8CJF7	Q8CJF7	Protein ELYS	Ahctf1	S	1541	0.261993	0.874881	-0.0697591	1	0.921564	0.941066	0.609376	0.798924	0.807989
Q8CJF7	Q8CJF7	Protein ELYS	Ahctf1	S	1218	0.285586	0.883426	0.0200594	0.965976	0.938202	0.935421	0.941283	0.970896	1
Q8CJF7	Q8CJF7	Protein ELYS	Ahctf1	T	1224	0.683247	0.940117	0.00661596	0.959364	0.971958	1	0.990467	0.965664	0.989269
Q6PAL7	Q6PAL7	AT-hook DNA-binding motif-containing protein 1	Ahdc1	S	99	0.551744	0.927329	-0.00898703	0.960869	0	1	0.889047	0	0.919609
Q6PAL7	Q6PAL7	AT-hook DNA-binding motif-containing protein 1	Ahdc1	S	1540	0.752192	0.944203	-0.00536717	0.912508	0.892182	0.991301	1	0.910058	0.873192
Q6PAL7	Q6PAL7	AT-hook DNA-binding motif-containing protein 1	Ahdc1	S	842	0.718272	0.942274	0.012146	0.948635	0.822048	0.921145	1	0.85878	0.96657
Q6PAL7	Q6PAL7	AT-hook DNA-binding motif-containing protein 1	Ahdc1	S	1498	0.457758	0.919999	0.0995484	0	0	0	1	0	0.929792
Q6PAL7	Q6PAL7	AT-hook DNA-binding motif-containing protein 1	Ahdc1	T	41	0.446739	0.917997	-0.0224196	0.814863	0	0.932763	1	0.730936	0.649379
Q922M7	Q922M7	Ashwin	AI597479	S	193	0.01711	0.0881421	0.082516	0	0	0.982241	1	0.689264	0.756937
P31230	P31230	Aminoacyl tRNA synthase complex-interacting multifunctional protein 1;Endothelial monocyte-activating polypeptide 2	Aimp1	S	107	0.849614	0.949	0.00859427	0.902085	0.848426	1	0.778437	0.836101	0.952011
Q8R010	Q8R010	Aminoacyl tRNA synthase complex-interacting multifunctional protein 2	Aimp2	T	82	0.922972	0.952054	-0.00749029	1	0.93439	0.507648	0.888134	0.914125	0.991912
Q91XC0	Q91XC0	LIM domain-containing protein ajuba	Ajuba	S	89	0.224475	0.85777	-0.0350024	1	0.926669	0.853026	0.804182	0.934227	0.822412
Q91XC0	Q91XC0	LIM domain-containing protein ajuba	Ajuba	S	239	0.0805163	0.647718	-0.122577	1	0.906119	0	0.760775	0	0.803552
Q91XC0	Q91XC0	LIM domain-containing protein ajuba	Ajuba	S	129	0.200575	0.843478	0.0276847	0.917377	0.923686	0.97076	1	0.943931	0.996874
O08715	O08715	A-kinase anchor protein 1, mitochondrial	Akap1	S	55	0.13891	0.783257	0.0380174	0.949649	0.908842	0.999457	0.95781	0.96998	1
O08715	O08715	A-kinase anchor protein 1, mitochondrial	Akap1	S	101	0.490286	0.923421	0.0303702	0.869654	0.895974	0.800805	1	0.960518	0.918953
O08715	O08715	A-kinase anchor protein 1, mitochondrial	Akap1	S	103	0.203062	0.845117	-0.0329896	0.966184	1	0.970824	0.890609	0.93282	0.912336
O08715	O08715	A-kinase anchor protein 1, mitochondrial	Akap1	S	104	0.589895	0.932133	0.0642288	0	0	1	0	0.947292	0
Q9WTQ5	Q9WTQ5	A-kinase anchor protein 12	Akap12	S	1645	0.46713	0.920637	0.0124326	0.967896	0.970355	0.928687	0.898031	0.983453	1
Q9WTQ5	Q9WTQ5	A-kinase anchor protein 12	Akap12	S	767	0.768335	0.945069	-0.00682647	0.924907	1	0.956817	0.9475	0.943965	0.95902
Q9WTQ5	Q9WTQ5	A-kinase anchor protein 12	Akap12	S	637	0.718598	0.942293	0.0120803	0.927642	0.883565	0.798516	0.914547	1	0.865557
Q9WTQ5	Q9WTQ5	A-kinase anchor protein 12	Akap12	T	236	0.754882	0.942836	-0.019988	0	1	0	0	0	0.929048
Q9WTQ5	Q9WTQ5	A-kinase anchor protein 12	Akap12	T	1191	0.127627	0.765798	-0.0568007	1	0.971325	0.832085	0.973788	0.893536	0.85811
Q9WTQ5	Q9WTQ5	A-kinase anchor protein 12	Akap12	S	786	0.0019783	1.31959e-05	-0.18042	0.963134	1	0	0	0	0
Q9WTQ5	Q9WTQ5	A-kinase anchor protein 12	Akap12	S	598	0.552524	0.929986	-0.0104653	0.97141	0.985226	1	0.968178	0.968216	0.955291
Q9WTQ5	Q9WTQ5	A-kinase anchor protein 12	Akap12	S	584	0.947778	0.953002	0.0016692	0.952671	0.977537	0.975118	0.903729	0.936056	1
Q9WTQ5	Q9WTQ5	A-kinase anchor protein 12	Akap12	S	482	0.499365	0.922711	-0.0299645	0	0	1	0.802531	0	0
Q9WTQ5	Q9WTQ5	A-kinase anchor protein 12	Akap12	S	488	0.383862	0.907235	-0.0982242	0	1	0	0.923282	0	0.619402
Q9WTQ5	Q9WTQ5	A-kinase anchor protein 12	Akap12	S	489	0.64628	0.937607	-0.0148057	1	0.949997	0.973935	0.846866	0.962396	0.933925
Q9WTQ5	Q9WTQ5	A-kinase anchor protein 12	Akap12	S	350	0.293065	0.885714	-0.0723871	0.950905	0.977248	1	0.929043	0.677382	0.983114
E9Q394	E9Q394	NA	Akap13	S	1892	0.316254	0.892535	-0.0315344	0.980963	0.998564	1	0.977724	0.993018	0.885818
E9Q394	E9Q394	NA	Akap13	S	2663	0.232985	0.862098	0.0545648	0.754486	0.962199	0.974173	0.894286	1	0.950672
E9Q394	E9Q394	NA	Akap13	S	1613	0.120452	0.753191	-0.0544922	1	0.946601	0.794095	0.888776	0.908914	0.830725
E9Q394	E9Q394	NA	Akap13	S	2308	0.831066	0.947542	0.00473262	0	0	1	0	0.747527	0
E9Q394	E9Q394	NA	Akap13	S	1839	0.452469	0.918636	-0.0399631	0.993139	0.976929	1	0.746427	0.865664	0.945824
E9Q394	E9Q394	NA	Akap13	S	2692	0.653059	0.938085	0.0145791	0.99197	0.829603	0.989853	1	0.977403	0.910345
E9Q394	E9Q394	NA	Akap13	S	1253	0.0138454	0.0470984	-0.110913	1	0.983983	0	0	0	0
O54931	O54931	A-kinase anchor protein 2	Akap2	S	740	0.196892	0.840899	0.0218684	0.900643	0.908284	1	0.998819	0.935703	0.943155
O54931	O54931	A-kinase anchor protein 2	Akap2	S	799	0.000173855	3.85623e-14	-0.330183	1	0.999527	0	0	0	0
Q9DBR0	Q9DBR0	A-kinase anchor protein 8	Akap8	S	320	0.730139	0.942126	0.0184543	0.938191	0.931157	0.972245	0	0.961897	1
Q9DBR0	Q9DBR0	A-kinase anchor protein 8	Akap8	S	634	0.0518625	0.484124	0.109513	0	0	0.857529	0	1	0.86866
Q9DBR0	Q9DBR0	A-kinase anchor protein 8	Akap8	T	632	0.0499106	0.464081	0.214287	0	0	0.960792	0	1	0.915457
B1AXD8	B1AXD8	Akirin-2	Akirin2	S	55	0.267831	0.877074	-0.0379251	1	0.990399	0.812537	0.967279	0.936743	0.893011
B1AXD8	B1AXD8	Akirin-2	Akirin2	S	21	0.049277	0.457594	0.0476895	0.930296	0.892164	0.881688	0.920762	1	0.997118
Q8CG76	Q8CG76	Aflatoxin B1 aldehyde reductase member 2	Akr7a2	S	40	0.0454075	0.421567	-0.0937539	0.954953	1	0.734521	0.669195	0.836427	0.613754
Q9D1F4	Q9D1F4	Proline-rich AKT1 substrate 1	Akt1s1	S	184	0.930915	0.952365	0.00140454	0.922675	0.927494	1	0.98645	0.935899	0.918047
Q9D1F4	Q9D1F4	Proline-rich AKT1 substrate 1	Akt1s1	S	213	0.0931148	0.68801	0.0355971	0.94204	0.907523	0.942161	0.976651	0.991968	1
Q9D1F4	Q9D1F4	Proline-rich AKT1 substrate 1	Akt1s1	T	247	0.124941	0.761605	0.0315356	0.889295	0.861025	0.984255	1	0.912733	0.926048
Q60823	Q60823	RAC-beta serine/threonine-protein kinase	Akt2	T	451	0.977361	0.954082	-0.000440576	0.993343	0.991296	0.960755	0.953309	1	0.98322
P05064	P05064	Fructose-bisphosphate aldolase A	Aldoa	S	36	0.632917	0.936194	0.0359983	0.892014	0.760869	0	0.75021	0.789062	1
P05064	P05064	Fructose-bisphosphate aldolase A	Aldoa	S	39	0.470833	0.92109	-0.0147176	0.942685	0.979508	1	0.987861	0.905865	0.960425
P05064	P05064	Fructose-bisphosphate aldolase A	Aldoa	S	46	0.34989	0.900779	-0.0521221	0.924211	1	0.887953	0.728797	0.965972	0.745069
Q3TSG4	Q3TSG4	RNA demethylase ALKBH5	Alkbh5	S	362	0.481403	0.922398	0.0143921	0.934829	0.987397	0.967396	1	0.993839	0.979804
P39654	P39654	Arachidonate 15-lipoxygenase	Alox15	S	245	0.614303	0.935021	0.0777345	1	0	0	0	0.894348	0.739794
P39654	P39654	Arachidonate 15-lipoxygenase	Alox15	T	246	0.610279	0.934609	0.0794388	1	0	0	0	0.894348	0.739794
Q920R0	Q920R0	Alsin	Als2	S	486	0.189261	0.835748	0.0276169	0.913254	0.901741	0	0	1	0.959208
Q920R0	Q920R0	Alsin	Als2	S	1456	0.835645	0.94837	0.00800028	0.878982	0.810492	0.809012	1	0.823014	0.902378
Q920R0	Q920R0	Alsin	Als2	S	1458	0.329828	0.896107	-0.0229726	1	0.922705	0.931437	0.959126	0.939961	0.8755
Q920R0	Q920R0	Alsin	Als2	S	477	0.866791	0.949163	-0.0182742	0.801507	0.794142	0.956206	0.445938	1	0
Q920R0	Q920R0	Alsin	Als2	S	483	0.340624	0.899286	0.0601818	0.936953	0	1	0.85895	0.867828	0.958869
Q920R0	Q920R0	Alsin	Als2	S	486	0.857658	0.948839	-0.0187909	0.801507	0.794142	0.956206	0.445938	1	0
Q9R049	Q9R049	E3 ubiquitin-protein ligase AMFR	Amfr	S	552	0.200141	0.842588	0.0701696	0	0	0	1	0.86682	0.93711
Q9R049	Q9R049	E3 ubiquitin-protein ligase AMFR	Amfr	S	542	0.274641	0.879559	-0.0408941	0.809675	0.963846	0.892441	1	0.781634	0.809819
Q9R049	Q9R049	E3 ubiquitin-protein ligase AMFR	Amfr	T	548	0.762275	0.944295	-0.0224275	0	0.785542	0	1	0.795188	0
Q8VHG2	Q8VHG2	Angiomotin	Amot	S	691	0.362851	0.903251	-0.101277	0.842309	0.887056	0	1	0	0.806707
Q8VHG2	Q8VHG2	Angiomotin	Amot	S	693	0.94341	0.952837	-0.0046446	0.740504	1	0.81952	0.92976	0.871234	0.854229
Q8VHG2	Q8VHG2	Angiomotin	Amot	S	1083	0.672102	0.939175	0.0405779	0.975577	0	1	0.761662	0.928676	0.751425
Q8VHG2	Q8VHG2	Angiomotin	Amot	T	1084	0.303808	0.889592	-0.0465147	0.777136	1	0	0	0.749411	0.818393
Q9D4H4	Q9D4H4	Angiomotin-like protein 1	Amotl1	S	804	0.310494	0.88749	-0.0426045	1	0.908699	0.907232	0	0.878487	0.803786
Q8K371	Q8K371	Angiomotin-like protein 2	Amotl2	S	599	0.34565	0.900143	0.0989547	0	0.963323	0.853949	0	1	0.900388
Q8K371	Q8K371	Angiomotin-like protein 2	Amotl2	S	716	0.376981	0.906402	0.0411842	1	0.806595	0.988549	0.973666	0.981993	0.965106
Q8K371	Q8K371	Angiomotin-like protein 2	Amotl2	S	664	0.163854	0.812818	-0.0820944	1	0.964693	0.868424	0.865722	0.95396	0.698393
Q8K371	Q8K371	Angiomotin-like protein 2	Amotl2	S	667	0.101537	0.714179	-0.0951964	0.982757	0.732353	0.91851	1	0.706203	0
Q8K371	Q8K371	Angiomotin-like protein 2	Amotl2	S	752	0.519272	0.926689	0.0111075	0.991598	0.972487	0.960948	0.986996	1	0.998581
Q8K371	Q8K371	Angiomotin-like protein 2	Amotl2	S	184	0.120259	0.752692	-0.0777981	1	0.952275	0.920567	0.901165	0.931764	0.748606
Q8K371	Q8K371	Angiomotin-like protein 2	Amotl2	T	593	0.286642	0.881943	-0.128105	0.97086	0	0	1	0	0
Q8K371	Q8K371	Angiomotin-like protein 2	Amotl2	S	599	0.0917191	0.68097	0.126833	0	0.890855	0	0	1	0.981735
Q8K371	Q8K371	Angiomotin-like protein 2	Amotl2	S	603	0.662924	0.938308	0.0358973	0.987077	0.811764	0	0.848224	1	0.93737
Q9DBT5	Q9DBT5	AMP deaminase 2	Ampd2	S	37	0.131575	0.772153	-0.0564708	1	0.982856	0.846496	0.928853	0.946315	0.842943
Q9DBT5	Q9DBT5	AMP deaminase 2	Ampd2	S	87	0.879668	0.950307	-0.00253986	1	0.975789	0.977693	0.989419	0.99128	0.977043
Q9DBT5	Q9DBT5	AMP deaminase 2	Ampd2	S	53	0.925883	0.95217	0.00166682	0.975645	0.991324	0.949336	1	0.97693	0.997039
Q9DBT5	Q9DBT5	AMP deaminase 2	Ampd2	S	19	0.836081	0.947789	-0.0118604	1	0	0	0	0	0.969778
Q9DBT5	Q9DBT5	AMP deaminase 2	Ampd2	T	36	0.185447	0.832242	-0.0564708	1	0.982856	0.846496	0.971993	0.946315	0.842943
O08739	O08739	AMP deaminase 3	Ampd3	S	85	0.0462683	0.430334	0.0592086	0.935535	0.870759	0.973674	0.969678	0.980651	1
P53995	P53995	Anaphase-promoting complex subunit 1	Anapc1	S	688	0.896811	0.951017	-0.00206863	0.948258	0.96226	0.993547	1	0.943249	0.960857
P53995	P53995	Anaphase-promoting complex subunit 1	Anapc1	S	343	0.309152	0.88977	0.0636039	0.769103	0.803757	0.931255	0	1	0.87028
Q8BZQ7	Q8BZQ7	Anaphase-promoting complex subunit 2	Anapc2	S	547	0.886723	0.950248	-0.0138683	0.880562	0	0	1	0	0.845033
Q8BZQ7	Q8BZQ7	Anaphase-promoting complex subunit 2	Anapc2	S	549	0.666303	0.938992	0.0212579	0.78556	1	0.878613	0.773704	0.921809	0.944036
Q8BZQ7	Q8BZQ7	Anaphase-promoting complex subunit 2	Anapc2	S	513	0.279607	0.881296	-0.0485005	0.942006	0.992526	1	0.987211	0.975506	0.724553
Q8BZQ7	Q8BZQ7	Anaphase-promoting complex subunit 2	Anapc2	S	514	0.279607	0.881296	-0.0485005	0.942006	0.992526	1	0.987211	0.975506	0.724553
Q91W96	Q91W96	Anaphase-promoting complex subunit 4	Anapc4	S	777	0.807405	0.946597	-0.0517523	0.995927	0	0	1	0	0.836751
Q91W96	Q91W96	Anaphase-promoting complex subunit 4	Anapc4	S	777	0.0509445	0.47099	0.0731319	0.908879	0.833134	0.994315	0.942492	0.960132	1
Q91W96	Q91W96	Anaphase-promoting complex subunit 4	Anapc4	S	779	0.382229	0.907403	0.0389829	0.986059	0.837897	1	0.94788	0.992395	0.948493
Q91W96	Q91W96	Anaphase-promoting complex subunit 4	Anapc4	T	781	0.205516	0.846536	0.05806	0.980454	0.833134	0.994315	0.942492	0.986754	1
Q8C8R3	Q8C8R3	Ankyrin-2	Ank2	S	846	0.00623964	0.00435479	-0.170329	1	0.973376	0	0	0.580588	0.738366
Q8C8R3	Q8C8R3	Ankyrin-2	Ank2	S	3786	0.000637539	7.45633e-10	-0.241002	0.961258	1	0	0	0	0
Q8C8R3	Q8C8R3	Ankyrin-2	Ank2	T	853	0.355218	0.902745	0.135285	0	0	0.90319	0	0	1
Q6ZPS6	Q6ZPS6	Ankyrin repeat and IBR domain-containing protein 1	Ankib1	S	738	0.266661	0.876639	0.0392896	0.831393	0.78672	0.927547	0.924442	1	0.810806
Q6P1H6	Q6P1H6	Ankyrin repeat and LEM domain-containing protein 2	Ankle2	S	820	0.95135	0.953134	0.00343953	0.777391	0.792831	1	0.859981	0.936382	0.648644
E9Q4F7	E9Q4F7	NA	Ankrd11	S	1799	0.669304	0.939199	-0.00755508	0.9855	1	0.933103	0.909177	0.956026	0.998502
Q99NH0	Q99NH0	Ankyrin repeat domain-containing protein 17	Ankrd17	S	2401	0.201413	0.84397	0.0375923	0.97404	0.885928	0.990663	1	0.982825	0.98942
Q99NH0	Q99NH0	Ankyrin repeat domain-containing protein 17	Ankrd17	S	15	0.437372	0.916243	-0.0286138	0	0	0.877272	1	0	0
Q505D1	Q505D1	Serine/threonine-protein phosphatase 6 regulatory ankyrin repeat subunit A	Ankrd28	S	1011	0.239155	0.865092	0.0361297	0.859073	0.964037	1	0.960476	0.962175	0.989787
P59672	P59672	Ankyrin repeat and SAM domain-containing protein 1A	Anks1a	S	461	0.0506002	0.471773	0.139332	0.634683	0	0.935903	1	0.874044	0.707267
P59672	P59672	Ankyrin repeat and SAM domain-containing protein 1A	Anks1a	S	462	0.577037	0.932011	0.0574414	0	0	1	0	0	0.768182
P59672	P59672	Ankyrin repeat and SAM domain-containing protein 1A	Anks1a	S	679	0.867269	0.94978	-0.00264961	0.982437	1	0.954427	0.96697	0.991751	0.981836
Q8K298	Q8K298	Actin-binding protein anillin	Anln	S	180	0.661957	0.938699	-0.0120955	0.952557	0.983928	0.97864	0.966937	0.893306	1
Q8K298	Q8K298	Actin-binding protein anillin	Anln	S	182	0.000445106	8.62376e-12	0.26795	0	0	0	0	0.921935	1
Q8K298	Q8K298	Actin-binding protein anillin	Anln	S	653	0.785793	0.945972	0.00539397	1	0.952148	0.93072	0.971971	0.987332	0.984113
Q8K298	Q8K298	Actin-binding protein anillin	Anln	S	292	0.952652	0.953184	-0.00120547	0.989239	1	0.991314	0.930811	0.995881	0.989398
Q8K298	Q8K298	Actin-binding protein anillin	Anln	S	637	0.289482	0.884579	-0.0420311	0.998384	0.984835	0.952184	0.972102	1	0.79492
Q8K298	Q8K298	Actin-binding protein anillin	Anln	S	512	0.784243	0.945467	-0.0262132	0	1	0.927283	0	0.989538	0
Q8K298	Q8K298	Actin-binding protein anillin	Anln	S	513	0.472795	0.92184	0.0813342	1	0	0.951554	0.908069	0.890752	0.868033
Q6PB70	Q6PB70	Anoctamin-8	Ano8	S	665	0.879898	0.950315	0.00273184	0.944062	0.977952	1	0.992479	0.984501	0.947509
Q6PB70	Q6PB70	Anoctamin-8	Ano8	S	637	0.0877708	0.669892	-0.0749791	0.992115	0.9399	1	0.977351	0.908572	0.765617
Q9EST5	Q9EST5	Acidic leucine-rich nuclear phosphoprotein 32 family member B	Anp32b	T	265	0.675367	0.939596	0.0345046	0.86856	0.594956	0.760367	0.756636	1	0.612708
Q9CZ52	Q9CZ52	Anthrax toxin receptor 1	Antxr1	S	561	0.060922	0.553653	0.110154	0.651191	0.688194	0	0	0.773699	1
Q9CZ52	Q9CZ52	Anthrax toxin receptor 1	Antxr1	S	360	0.315457	0.892281	0.0574847	0.718059	0.970618	1	0.947713	0.927639	0.975047
P10107	P10107	Annexin A1	Anxa1	S	34	0.696337	0.940943	-0.00664196	1	0.986028	0.965974	0.932742	0.976135	0.986499
P10107	P10107	Annexin A1	Anxa1	S	37	0.18364	0.830975	-0.177396	0.886389	1	0.914258	0.905155	0.908686	0
P07356	P07356	Annexin A2	Anxa2	S	127	0.686896	0.940346	-0.00886385	0.916529	1	0.912369	0.919936	0.915745	0.96167
P07356	P07356	Annexin A2	Anxa2	S	12	0.0253512	0.185318	-0.222817	0.970472	1	0.934569	0	0	0
P07356	P07356	Annexin A2	Anxa2	S	22	0.482357	0.922051	0.109897	0	0	0.958502	0	1	0
P07356	P07356	Annexin A2	Anxa2	S	89	0.775122	0.944678	0.015231	0.608686	0	0.486547	1	0	0
P07356	P07356	Annexin A2	Anxa2	S	2	0.541854	0.928961	-0.0126971	1	0.94239	0.919773	0.896501	0.954983	0.944986
P07356	P07356	Annexin A2	Anxa2	T	123	0.640673	0.936636	-0.00493749	0	1	0.76664	0.648951	0.977806	0.895292
P07356	P07356	Annexin A2	Anxa2	T	3	0.541854	0.928961	-0.0126971	1	0.94239	0.919773	0.896501	0.954983	0.944986
P07356	P07356	Annexin A2	Anxa2	Y	24	0.692749	0.940718	-0.0083984	0.976108	1	0.984808	0.927991	0.977473	0.973043
O35643	O35643	AP-1 complex subunit beta-1	Ap1b1	S	783	0.144575	0.788803	-0.0495481	0.97947	1	0	0	0	0
P35585	P35585	AP-1 complex subunit mu-1	Ap1m1	T	152	0.799734	0.946669	0.00628392	0.903786	0.947172	1	0.912475	0.925427	0.949029
P35585	P35585	AP-1 complex subunit mu-1	Ap1m1	T	223	0.289748	0.884661	-0.0589032	1	0.75135	0.774806	0.957908	0.723495	0.757545
P17426	P17426	AP-2 complex subunit alpha-1	Ap2a1	S	655	0.40905	0.912137	0.0299309	1	0.837294	0.976841	0.970279	0.975938	0.975151
Q9DBG3	Q9DBG3	AP-2 complex subunit beta	Ap2b1	S	4	0.00259749	6.6785e-05	-0.187854	0.929463	1	0	0	0	0
Q9DBG3	Q9DBG3	AP-2 complex subunit beta	Ap2b1	T	2	0.0336657	0.294155	0.207341	0	0	0	0.820979	1	0.848753
P84091	P84091	AP-2 complex subunit mu	Ap2m1	T	156	0.473651	0.921434	-0.0168104	0.944316	0.938291	1	0.926939	0.925931	0.900954
Q9Z1T1	Q9Z1T1	AP-3 complex subunit beta-1	Ap3b1	S	276	0.923564	0.952079	-0.00212607	0.960801	0.991744	0.956916	0.91772	0.945525	1
O54774	O54774	AP-3 complex subunit delta-1	Ap3d1	S	760	0.3664	0.904366	-0.019367	0.977452	1	0.963593	0.970949	0.985064	0.940456
O54774	O54774	AP-3 complex subunit delta-1	Ap3d1	S	9	0.119657	0.752576	-0.152782	0.997416	1	0.691719	0	0	0.897084
O54774	O54774	AP-3 complex subunit delta-1	Ap3d1	S	784	0.323838	0.89463	0.0180254	0.954862	0.96624	0.980066	0.986538	0.971087	1
O54774	O54774	AP-3 complex subunit delta-1	Ap3d1	T	758	0.856264	0.948914	0.0353356	0.872218	0	0	0	0	1
O54774	O54774	AP-3 complex subunit delta-1	Ap3d1	S	754	0.866461	0.949523	0.018939	0.780334	0	1	0.89084	0.954446	0
O54774	O54774	AP-3 complex subunit delta-1	Ap3d1	S	755	0.385162	0.907974	0.0261377	0.884207	0.922135	0.958216	0.997008	0.89718	1
O54774	O54774	AP-3 complex subunit delta-1	Ap3d1	S	760	0.0539983	0.495613	0.0387147	0.895866	0.894144	1	0.999255	0.950828	0.969645
O54774	O54774	AP-3 complex subunit delta-1	Ap3d1	T	758	0.00716928	0.00715612	0.127795	0.758476	0.735127	0.859199	0.972058	0.9685	1
Q80V94	Q80V94	AP-4 complex subunit epsilon-1	Ap4e1	S	962	0.174665	0.823227	-0.0497372	0.845429	1	0.950623	0.928937	0.793971	0.844028
Q8R5A3	Q8R5A3	Amyloid beta A4 precursor protein-binding family B member 1-interacting protein	Apbb1ip	S	507	0.453849	0.918611	-0.084001	0.902593	0.946209	0.97975	0	1	0
Q8R5A3	Q8R5A3	Amyloid beta A4 precursor protein-binding family B member 1-interacting protein	Apbb1ip	S	532	0.0887684	0.672423	0.173579	0	0	1	0	0.890052	0.937229
Q9DBR4	Q9DBR4	Amyloid beta A4 precursor protein-binding family B member 2	Apbb2	S	334	0.761221	0.944691	0.00804191	0.946335	0.97312	0.774145	0.652581	1	0.955326
Q9DBR4	Q9DBR4	Amyloid beta A4 precursor protein-binding family B member 2	Apbb2	S	160	0.959039	0.953419	-0.00120445	0.900275	0.887499	0.979026	1	0.836416	0.945897
Q61315	Q61315	Adenomatous polyposis coli protein	Apc	S	778	0.530233	0.927808	-0.0127598	0.94761	1	0.938949	0.960242	0.966843	0.933847
Q61315	Q61315	Adenomatous polyposis coli protein	Apc	S	2283	0.364405	0.904592	-0.0471403	0.949386	0.961785	0.965473	0.999325	0	1
Q61315	Q61315	Adenomatous polyposis coli protein	Apc	S	1040	0.00169406	4.16188e-06	0.159407	0	0	0	0	0.981179	1
Q8R146	Q8R146	Acylamino-acid-releasing enzyme	Apeh	S	187	0.0735771	0.612536	-0.101227	1	0.779079	0.661856	0.712524	0.716787	0.657758
P28352	P28352	DNA-(apurinic or apyrimidinic site) lyase;DNA-(apurinic or apyrimidinic site) lyase, mitochondrial	Apex1	S	18	0.25987	0.874002	0.0270776	0.897211	0.942072	0.902919	0.958775	0.947407	1
O35841	O35841	Apoptosis inhibitor 5	Api5	S	464	0.031788	0.270772	0.0492244	0.900871	0.890246	0.917638	0.890086	0.978191	1
Q8K4Z3	Q8K4Z3	NAD(P)H-hydrate epimerase	Apoa1bp	S	43	0.73828	0.943428	-0.0198145	0.92212	0.969559	0.953181	0.812216	0.835299	1
Q8K4Z3	Q8K4Z3	NAD(P)H-hydrate epimerase	Apoa1bp	T	45	0.171226	0.821541	-0.233116	0	0.995365	0.937952	1	0	0
Q8VBT6	Q8VBT6	Apolipoprotein B receptor	Apobr	S	484	0.917388	0.951837	0.00266415	0.929703	0.964956	0.942022	0.899915	0.904897	1
P08030	P08030	Adenine phosphoribosyltransferase	Aprt	S	15	0.291423	0.885286	-0.0231528	0.966477	0.962344	0.936763	1	0.891709	0.939924
P04627;Q99N57	Q99N57	Serine/threonine-protein kinase A-Raf;RAF proto-oncogene serine/threonine-protein kinase	Araf;Raf1	S	580;621	0.36473	0.904026	0.0191615	0.943255	0.94255	0.95393	0.93068	0.946796	1
P04627	P04627	Serine/threonine-protein kinase A-Raf	Araf	Y	155	0.223502	0.857567	-0.0835031	0.985783	1	0.991496	0.907116	0	0.985986
Q4LDD4	Q4LDD4	Arf-GAP with Rho-GAP domain, ANK repeat and PH domain-containing protein 1	Arap1	S	232	0.594536	0.932859	-0.0282	0.921847	1	0.653739	0	0.96296	0.858973
Q4LDD4	Q4LDD4	Arf-GAP with Rho-GAP domain, ANK repeat and PH domain-containing protein 1	Arap1	S	210	0.921956	0.951165	0.00147867	0	0.897403	0	0	1	0
Q8CHG5	Q8CHG5	Apoptosis-resistant E3 ubiquitin protein ligase 1	Arel1	S	327	0.124965	0.758436	0.0942905	0	0.805521	0.855047	0	0.884888	1
Q9EPJ9	Q9EPJ9	ADP-ribosylation factor GTPase-activating protein 1	Arfgap1	S	360	0.457598	0.919393	0.0126747	0.955708	0.968642	0.953356	0.955621	1	0.969299
Q9EPJ9	Q9EPJ9	ADP-ribosylation factor GTPase-activating protein 1	Arfgap1	S	344	0.0704762	0.589226	0.0836492	0	0	0	0.950858	1	0.979741
Q99K28	Q99K28	ADP-ribosylation factor GTPase-activating protein 2	Arfgap2	S	431	0.141564	0.787163	0.0305239	0.941872	0.91219	0.986884	1	0.962068	0.993139
Q99K28	Q99K28	ADP-ribosylation factor GTPase-activating protein 2	Arfgap2	S	432	0.047709	0.443667	0.0521213	0.87404	0.911071	0.977408	0.998773	0.957608	1
Q99K28	Q99K28	ADP-ribosylation factor GTPase-activating protein 2	Arfgap2	S	140	0.357381	0.902184	0.0511241	1	0	0	0	0.980159	0.945584
Q99K28	Q99K28	ADP-ribosylation factor GTPase-activating protein 2	Arfgap2	S	239	0.00969161	0.0184032	0.160398	0.718828	0	0.752525	0.775609	1	0.921675
Q9D8S3	Q9D8S3	ADP-ribosylation factor GTPase-activating protein 3	Arfgap3	S	241	0.0915191	0.683069	-0.0410557	0.999987	1	0.997137	0.947294	0.931736	0.949159
Q9D8S3	Q9D8S3	ADP-ribosylation factor GTPase-activating protein 3	Arfgap3	S	331	0.0383536	0.323386	-0.146827	1	0.823835	0.853032	0	0	0
G3X9K3	G3X9K3	Brefeldin A-inhibited guanine nucleotide-exchange protein 1	Arfgef1	S	1566	0.783403	0.94585	0.00730979	0.936617	1	0.967074	0.892547	0.968524	0.992726
A2A5R2	A2A5R2	Brefeldin A-inhibited guanine nucleotide-exchange protein 2	Arfgef2	S	227	0.0556879	0.508469	0.0453893	0.914255	0.898708	0.9219	0.943963	0.960762	1
A2A5R2	A2A5R2	Brefeldin A-inhibited guanine nucleotide-exchange protein 2	Arfgef2	S	1535	0.402264	0.911044	-0.0173162	0.963833	0.973927	1	0.980346	0.967839	0.899048
A2A5R2	A2A5R2	Brefeldin A-inhibited guanine nucleotide-exchange protein 2	Arfgef2	T	623	0.134579	0.776921	-0.0391157	1	0.935557	0.935736	0.908854	0.916966	0.892328
A2A5R2	A2A5R2	Brefeldin A-inhibited guanine nucleotide-exchange protein 2	Arfgef2	S	1518	0.0321219	0.274997	-0.299107	1	0.937906	0.941868	0	0	0
A2A5R2	A2A5R2	Brefeldin A-inhibited guanine nucleotide-exchange protein 2	Arfgef2	S	621	0.181273	0.828977	-0.0409305	0.99305	0.959221	0.918233	1	0.932283	0.891394
A2A5R2	A2A5R2	Brefeldin A-inhibited guanine nucleotide-exchange protein 2	Arfgef2	T	224	0.816649	0.946549	-0.0252892	0	1	0	0	0.992472	0
A2A5R2	A2A5R2	Brefeldin A-inhibited guanine nucleotide-exchange protein 2	Arfgef2	S	214	0.9613	0.953501	0.00270009	0.857535	0.895907	0.721684	1	0.873879	0.889914
A2A5R2	A2A5R2	Brefeldin A-inhibited guanine nucleotide-exchange protein 2	Arfgef2	S	227	0.489128	0.923282	-0.0356198	1	0.89195	0.718496	0.942131	0.870019	0.885983
A2A5R2	A2A5R2	Brefeldin A-inhibited guanine nucleotide-exchange protein 2	Arfgef2	S	621	0.131829	0.772548	-0.0554823	1	0.888612	0.888782	0.863248	0.870953	0.847552
Q3UL36	Q3UL36	Arginine and glutamate-rich protein 1	Arglu1	S	74	0.750447	0.944106	-0.0138949	0.786735	0.971435	1	0.798847	0.875291	0.813149
Q3UL36	Q3UL36	Arginine and glutamate-rich protein 1	Arglu1	S	75	0.657046	0.938376	-0.00699505	0.988884	0.995098	0.989847	1	0.987523	0.979115
Q5FWK3	Q5FWK3	Rho GTPase-activating protein 1	Arhgap1	S	51	0.8364	0.947885	0.0434977	0.852122	0	0	0.84378	0	1
Q8C0D4	Q8C0D4	Rho GTPase-activating protein 12	Arhgap12	S	238	0.112972	0.73802	-0.136746	1	0.841717	0.795847	0.746263	0	0.825482
Q8C0D4	Q8C0D4	Rho GTPase-activating protein 12	Arhgap12	S	584	0.922799	0.951495	-0.00177894	0	1	0	0	0	0.999291
Q6DFV3	Q6DFV3	Rho GTPase-activating protein 21	Arhgap21	S	41	0.614633	0.935387	-0.0619518	1	0	0	0	0.853707	0
Q6DFV3	Q6DFV3	Rho GTPase-activating protein 21	Arhgap21	S	917	0.945415	0.952913	0.00376441	0.6709	0.663313	1	0.717694	0.678239	0.670652
Q6DFV3	Q6DFV3	Rho GTPase-activating protein 21	Arhgap21	S	850	0.00115821	3.2471e-07	-0.201819	0.970483	1	0	0	0	0
Q8BL80	Q8BL80	Rho GTPase-activating protein 22	Arhgap22	S	387	0.430665	0.915552	0.0205143	0.875199	0.793226	0.927994	1	0.838073	0.944212
Q8BL80	Q8BL80	Rho GTPase-activating protein 22	Arhgap22	S	397	0.415728	0.911128	0.088896	0	0	1	0.938906	0.881331	0
Q69ZH9	Q69ZH9	Rho GTPase-activating protein 23	Arhgap23	S	1221	0.385975	0.908711	0.0963136	0	0	0.774081	0.766493	1	0
Q69ZH9	Q69ZH9	Rho GTPase-activating protein 23	Arhgap23	S	550	0.22366	0.857339	0.0354552	0.908875	0.829811	1	0.979734	0.967899	0.898421
Q69ZH9	Q69ZH9	Rho GTPase-activating protein 23	Arhgap23	S	552	0.900857	0.950287	0.00385714	0	0.965683	0.862613	0	0	1
Q69ZH9	Q69ZH9	Rho GTPase-activating protein 23	Arhgap23	S	607	0.209374	0.848945	-0.0747937	0.925545	0.917227	0.949422	1	0.9105	0.635901
Q69ZH9	Q69ZH9	Rho GTPase-activating protein 23	Arhgap23	S	361	0.589754	0.933271	-0.0103876	1	0.994495	0.93886	0.984433	0.997204	0.957498
Q69ZH9	Q69ZH9	Rho GTPase-activating protein 23	Arhgap23	S	372	0.183056	0.830394	0.0457669	0.763745	0.729761	1	0.89417	0.790029	0.899862
Q69ZH9	Q69ZH9	Rho GTPase-activating protein 23	Arhgap23	S	619	0.347282	0.900193	0.0483906	0.907236	0.754242	0.938527	0.918679	1	0.834501
Q8BN58	Q8BN58	Rho GTPase-activating protein 28	Arhgap28	S	53	0.230946	0.861049	0.0269487	0.915118	0.949606	0.967463	0.923475	0.960987	1
Q8BN58	Q8BN58	Rho GTPase-activating protein 28	Arhgap28	S	640	0.676375	0.939664	0.0124281	0.987251	0.948347	0.811137	0.925128	0.979324	1
Q8CGF1	Q8CGF1	Rho GTPase-activating protein 29	Arhgap29	S	1039	0.144853	0.78381	-0.0875255	0.89648	0	1	0.836182	0	0
Q8CGF1	Q8CGF1	Rho GTPase-activating protein 29	Arhgap29	S	1040	0.526725	0.926829	0.0566723	0	0.636081	0.558427	1	0.684083	0.679999
A6X8Z5	A6X8Z5	Rho GTPase-activating protein 31	Arhgap31	S	1092	0.671744	0.939358	-0.0114638	0.881731	1	0.956249	0.996193	0.919256	0.915323
A6X8Z5	A6X8Z5	Rho GTPase-activating protein 31	Arhgap31	S	1093	0.599239	0.934039	-0.0366554	0.728933	1	0.956249	0.888187	0.662841	0.915323
A6X8Z5	A6X8Z5	Rho GTPase-activating protein 31	Arhgap31	S	765	0.845892	0.948737	-0.0144808	0.926764	0.931839	0	0.833129	1	0.801463
A6X8Z5	A6X8Z5	Rho GTPase-activating protein 31	Arhgap31	S	272	0.568276	0.931401	-0.0304445	0.789422	0.915547	0.743874	1	0.887711	0.653145
A6X8Z5	A6X8Z5	Rho GTPase-activating protein 31	Arhgap31	T	769	0.404797	0.911848	-0.067838	0.918363	0.929329	0.936179	0.834807	0	1
Q811P8	Q811P8	Rho GTPase-activating protein 32	Arhgap32	S	856	0.0853332	0.661873	0.0322449	0.894703	0.895502	0.922561	0.897027	1	0.991192
Q811P8	Q811P8	Rho GTPase-activating protein 32	Arhgap32	S	952	0.46941	0.920919	-0.0133565	0.965429	1	0.981518	0.94406	0.948578	0.963599
Q91YM2	Q91YM2	Rho GTPase-activating protein 35	Arhgap35	S	975	0.280932	0.881989	-0.177703	0.98659	0.936517	0.995027	0.834022	1	0
Q91YM2	Q91YM2	Rho GTPase-activating protein 35	Arhgap35	S	1106	0.00181184	8.21619e-06	-0.203799	0.924876	0.960348	1	0.899165	0.557148	0.627085
Q91YM2	Q91YM2	Rho GTPase-activating protein 35	Arhgap35	S	1176	0.926215	0.951612	-0.00923836	1	0	0	0	0	0.983067
Q91YM2	Q91YM2	Rho GTPase-activating protein 35	Arhgap35	S	1179	0.919614	0.951924	-0.00364378	0.928752	0.948709	0.946346	0.981908	1	0.866124
Q91YM2	Q91YM2	Rho GTPase-activating protein 35	Arhgap35	Y	1105	0.0521466	0.480153	-0.104476	0.932746	0.919772	0.930964	1	0.820532	0.630081
P97393	P97393	Rho GTPase-activating protein 5	Arhgap5	S	968	0.781603	0.945758	-0.00821081	0.961101	0.879316	1	0.932979	0.857741	0.949613
P97393	P97393	Rho GTPase-activating protein 5	Arhgap5	S	1217	0.948897	0.953045	0.00103999	0.97914	0.993601	0.972582	0.973779	0.976109	1
P97393	P97393	Rho GTPase-activating protein 5	Arhgap5	S	1194	0.132175	0.773459	-0.0323623	0.955914	1	0.936036	0.955252	0.911429	0.930736
P97393	P97393	Rho GTPase-activating protein 5	Arhgap5	T	1216	0.939316	0.952657	-0.00875492	1	0.912834	0.892415	0	0.89538	0.989194
Q99PT1	Q99PT1	Rho GDP-dissociation inhibitor 1	Arhgdia	S	24	0.94397	0.952773	-0.00747584	1	0.890381	0.899728	0	0.949567	0.915871
Q61210	Q61210	Rho guanine nucleotide exchange factor 1	Arhgef1	S	905	0.713498	0.941988	-0.0176415	0.999793	0.82293	0.918197	1	0.966022	0.779959
Q8C033	Q8C033	Rho guanine nucleotide exchange factor 10	Arhgef10	S	157	0.55453	0.929663	0.0771676	0	0.973741	1	0	0.86085	0.928392
Q8C033	Q8C033	Rho guanine nucleotide exchange factor 10	Arhgef10	S	7	0.0518593	0.466757	0.253219	0	0	0	0.932678	0.877931	1
Q8C033	Q8C033	Rho guanine nucleotide exchange factor 10	Arhgef10	S	1259	0.332997	0.896717	0.0788833	0	0	1	0.769429	0	0.946933
Q8C033	Q8C033	Rho guanine nucleotide exchange factor 10	Arhgef10	S	1291	0.623876	0.936124	0.0486625	1	0	0	0.965779	0.868666	0.92814
Q8C033	Q8C033	Rho guanine nucleotide exchange factor 10	Arhgef10	S	108	0.422938	0.914373	-0.0218161	1	0.941368	0.96129	0.908748	0.903256	0.964045
A2AWP8	A2AWP8	Rho guanine nucleotide exchange factor 10-like protein	Arhgef10l	T	121	0.630629	0.937174	0.00590832	0	0.843396	1	0	0	0.92127
Q80U35	Q80U35	Rho guanine nucleotide exchange factor 17	Arhgef17	S	689	0.904502	0.951325	-0.00317824	0.979062	0.935335	0.950014	0.962377	0.903019	1
Q80U35	Q80U35	Rho guanine nucleotide exchange factor 17	Arhgef17	S	519	0.531431	0.928057	-0.0499084	0.976953	1	0	0.840453	0.907045	0.886933
Q80U35	Q80U35	Rho guanine nucleotide exchange factor 17	Arhgef17	S	414	0.084661	0.659673	0.0349088	0.927243	0.93359	0.942369	0.965684	1	0.978697
Q80U35	Q80U35	Rho guanine nucleotide exchange factor 17	Arhgef17	S	305	0.85521	0.948874	-0.0106722	0.957076	1	0.799529	0	0.938817	0.97641
Q80U35	Q80U35	Rho guanine nucleotide exchange factor 17	Arhgef17	S	308	0.116869	0.745721	0.132757	0	0.891325	0	0	1	0.945829
Q80U35	Q80U35	Rho guanine nucleotide exchange factor 17	Arhgef17	S	305	0.142153	0.790884	-0.0927173	0	0.912041	1	0.931942	0	0
Q80U35	Q80U35	Rho guanine nucleotide exchange factor 17	Arhgef17	S	994	0.819969	0.947642	0.00868229	0.859553	0.928752	0.862098	1	0.974832	0.849514
Q80U35	Q80U35	Rho guanine nucleotide exchange factor 17	Arhgef17	S	456	0.700797	0.939914	0.00325187	0	0	0	1	0	0.786577
Q80U35	Q80U35	Rho guanine nucleotide exchange factor 17	Arhgef17	S	458	0.648555	0.937783	-0.00732433	0.981874	0.988006	0.980451	1	0.977639	0.970129
Q80U35	Q80U35	Rho guanine nucleotide exchange factor 17	Arhgef17	S	906	0.340398	0.898609	-0.0422061	0.783798	0.932192	0.94768	1	0.841736	0.713469
Q80U35	Q80U35	Rho guanine nucleotide exchange factor 17	Arhgef17	S	142	0.204824	0.846253	-0.0249493	0.995992	1	0.934297	0.951941	0.972664	0.925518
Q80U35	Q80U35	Rho guanine nucleotide exchange factor 17	Arhgef17	S	728	0.62809	0.936295	0.00821142	0.978958	0.979235	0.942887	0.910539	0.98649	1
Q80U35	Q80U35	Rho guanine nucleotide exchange factor 17	Arhgef17	S	79	0.230687	0.860642	0.10164	0.951823	0	0.995149	0.787311	0.950278	1
Q6P9R4	Q6P9R4	Rho guanine nucleotide exchange factor 18	Arhgef18	S	961	0.628448	0.93589	-0.048229	1	0	0.933075	0	0.885364	0
Q6P9R4	Q6P9R4	Rho guanine nucleotide exchange factor 18	Arhgef18	S	1311	0.132965	0.774699	-0.0319039	0.990699	1	0.914568	0.919994	0.961509	0.908907
Q60875	Q60875	Rho guanine nucleotide exchange factor 2	Arhgef2	S	931	0.761359	0.94432	-0.0243905	0.944507	1	0.942858	0	0.889757	0.956066
Q60875	Q60875	Rho guanine nucleotide exchange factor 2	Arhgef2	S	646	0.685866	0.940283	-0.00681291	0.979186	1	0.985868	0.962136	0.972994	0.983683
Q60875	Q60875	Rho guanine nucleotide exchange factor 2	Arhgef2	S	885	0.604711	0.934482	0.0250551	0.802774	0.789779	0.748914	1	0.882036	0.815852
Q60875	Q60875	Rho guanine nucleotide exchange factor 2	Arhgef2	S	939	0.282468	0.882143	0.0904541	0	0	1	0.855995	0	0.917688
Q60875	Q60875	Rho guanine nucleotide exchange factor 2	Arhgef2	S	940	0.754169	0.944303	-0.03768	0.691582	0.85052	0	0	1	0
Q60875	Q60875	Rho guanine nucleotide exchange factor 2	Arhgef2	S	959	0.879624	0.949803	-0.0236345	0.987173	0	0	0.840241	1	0
Q9CWR0;A2CG49	Q9CWR0	Rho guanine nucleotide exchange factor 25;Kalirin	Arhgef25;Kalrn	S	516;2208	0.6177	0.935607	-0.029826	0	1	0.958492	0.621061	0	0.847941
Q3UPH7	Q3UPH7	Rho guanine nucleotide exchange factor 40	Arhgef40	S	959	0.457879	0.919376	-0.0267339	0.967464	0.978104	0.945738	0.964673	0.853124	1
Q3UPH7	Q3UPH7	Rho guanine nucleotide exchange factor 40	Arhgef40	S	1485	0.984792	0.954344	-0.000296032	1	0.984389	0.980032	0.982394	0.997154	0.986249
Q3UPH7	Q3UPH7	Rho guanine nucleotide exchange factor 40	Arhgef40	S	1472	0.973614	0.953947	0.000662387	0.921223	0.947536	1	0.951192	0.959223	0.912176
E9Q7D5	E9Q7D5	NA	Arhgef5	S	953	0.357253	0.902392	-0.0410372	0.899053	1	0.864411	0.929595	0.956454	0.780703
E9Q7D5	E9Q7D5	NA	Arhgef5	S	169	0.147067	0.798016	-0.137262	0	1	0.602838	0.558587	0	0.45529
E9Q7D5	E9Q7D5	NA	Arhgef5	S	1109	0.331031	0.896622	-0.120616	0.92835	0.943874	0	0.620165	1	0
E9Q7D5	E9Q7D5	NA	Arhgef5	S	1110	0.792755	0.946401	-0.0209769	0.895495	0.976161	0	0.783545	1	0.793609
E9Q7D5	E9Q7D5	NA	Arhgef5	T	168	0.256297	0.874353	-0.136715	1	0	0.981543	0	0	0
Q9ES28	Q9ES28	Rho guanine nucleotide exchange factor 7	Arhgef7	S	228	0.548984	0.928497	0.0743339	0	0	1	0	0.954015	0
Q9ES28	Q9ES28	Rho guanine nucleotide exchange factor 7	Arhgef7	S	776	0.237959	0.864547	0.0408437	0.847815	0.944954	0.91749	0.978779	0.934696	1
Q9ES28	Q9ES28	Rho guanine nucleotide exchange factor 7	Arhgef7	S	673	0.868412	0.949829	-0.00262978	0.981883	1	0.977052	0.982427	0.98154	0.992379
Q9ES28;Q8K4I3	Q9ES28	Rho guanine nucleotide exchange factor 7;Rho guanine nucleotide exchange factor 6	Arhgef7;Arhgef6	S	682;648	0.148765	0.796247	-0.0369698	0.939042	0.948909	1	0.970907	0.842728	0.915545
Q9ES28	Q9ES28	Rho guanine nucleotide exchange factor 7	Arhgef7	S	497	0.735037	0.943248	0.00549211	0.977688	0.990165	0.988102	0.99804	0.983296	1
Q9ES28;Q8K4I3	Q9ES28	Rho guanine nucleotide exchange factor 7;Rho guanine nucleotide exchange factor 6	Arhgef7;Arhgef6	T	683;649	0.148765	0.796247	-0.0369698	0.939042	0.948909	1	0.970907	0.842728	0.915545
A2BH40	A2BH40	AT-rich interactive domain-containing protein 1A	Arid1a	S	697	0.611084	0.934999	0.00820376	0.987578	0.969237	0.982944	0.987412	0.984448	1
A2BH40	A2BH40	AT-rich interactive domain-containing protein 1A	Arid1a	S	770	0.758756	0.944597	-0.0316644	0	1	0	0	0.982929	0
A2BH40	A2BH40	AT-rich interactive domain-containing protein 1A	Arid1a	S	773	0.197043	0.839559	-0.124903	1	0	0.873706	0	0	0
A2BH40	A2BH40	AT-rich interactive domain-containing protein 1A	Arid1a	S	365	0.0539341	0.495445	-0.0432475	1	0.993473	0.966765	0.982016	0.934962	0.89207
A2BH40	A2BH40	AT-rich interactive domain-containing protein 1A	Arid1a	T	1886	0.717926	0.941463	0.0260925	0	0	1	0	0.952878	0
A2BH40	A2BH40	AT-rich interactive domain-containing protein 1A	Arid1a	T	1874	0.796397	0.946543	-0.00651951	0	0.903506	1	0	0	0.883668
E9Q7E2	E9Q7E2	NA	Arid2	S	631	0.0489584	0.459721	-0.14385	0.985813	0.968792	0	1	0	0
Q8BM75	Q8BM75	AT-rich interactive domain-containing protein 5B	Arid5b	S	1032	0.719013	0.942319	-0.00606635	0.974581	1	0.998632	0.972742	0.972044	0.980501
Q640N2	Q640N2	ADP-ribosylation factor-like protein 13B	Arl13b	S	328	0.87654	0.949964	0.0105932	0.964058	0.978897	0.991245	0	1	0.990702
Q9JM93	Q9JM93	ADP-ribosylation factor-like protein 6-interacting protein 4	Arl6ip4	S	140	0.87216	0.949989	0.00271058	0.972886	1	0.977549	0.997818	0.985337	0.996727
Q8BH07	Q8BH07	ADP-ribosylation factor-like protein 6-interacting protein 6	Arl6ip6	S	80	0.677826	0.93976	0.00771761	0.935303	0.981007	1	0.985967	0.96589	0.976241
Q9D0L7	Q9D0L7	Armadillo repeat-containing protein 10	Armc10	S	43	0.966323	0.953685	-0.000671649	0.997616	0.990306	0.961693	0.980075	1	0.985721
P53762	P53762	Aryl hydrocarbon receptor nuclear translocator	Arnt	S	77	0.0845751	0.659397	-0.0411509	0.922359	0.982037	1	0.99329	0.881679	0.828231
Q9WV32	Q9WV32	Actin-related protein 2/3 complex subunit 1B	Arpc1b	S	310	0.819753	0.946567	-0.0205944	0	1	0	0	0	0.927779
P56212;P60840	P56212	cAMP-regulated phosphoprotein 19;Alpha-endosulfine	Arpp19;Ensa	S	62;67	0.329292	0.895966	0.0240702	0.892974	0.956492	0.932148	0.898538	1	0.941498
P98203	P98203	Armadillo repeat protein deleted in velo-cardio-facial syndrome homolog	Arvcf	S	871	0.354934	0.901586	-0.0896475	0.976371	0.928303	0.860406	0	1	0
P98203	P98203	Armadillo repeat protein deleted in velo-cardio-facial syndrome homolog	Arvcf	T	643	0.875401	0.950125	-0.00316735	0.938301	0.98642	1	0.979447	0.979765	0.932965
Q9QWY8	Q9QWY8	Arf-GAP with SH3 domain, ANK repeat and PH domain-containing protein 1	Asap1	S	1146	0.997995	0.954804	-5.83849e-05	1	0.915164	0.863467	0.928738	0.963218	0.951688
Q9QWY8	Q9QWY8	Arf-GAP with SH3 domain, ANK repeat and PH domain-containing protein 1	Asap1	S	800	0.163147	0.809752	-0.147485	1	0	0.946254	0.990566	0	0
Q9QWY8	Q9QWY8	Arf-GAP with SH3 domain, ANK repeat and PH domain-containing protein 1	Asap1	S	1059	0.791257	0.946247	0.00805586	0.973008	0.897681	0.978756	0.93229	0.900421	1
Q9QWY8	Q9QWY8	Arf-GAP with SH3 domain, ANK repeat and PH domain-containing protein 1	Asap1	S	732	0.923597	0.952079	0.00491062	0.966742	0.951743	0.950693	0.739023	1	0.934748
Q9QWY8	Q9QWY8	Arf-GAP with SH3 domain, ANK repeat and PH domain-containing protein 1	Asap1	S	1045	0.413548	0.912915	0.0166694	0.967991	0.924631	0.972556	0.998005	0.956922	1
Q9QWY8	Q9QWY8	Arf-GAP with SH3 domain, ANK repeat and PH domain-containing protein 1	Asap1	S	854	0.879328	0.950293	-0.00237262	1	0.986529	0.865179	0.850983	0.990307	0.988617
Q7SIG6	Q7SIG6	Arf-GAP with SH3 domain, ANK repeat and PH domain-containing protein 2	Asap2	S	704	0.818852	0.947593	0.00419726	0.952838	0.9882	0.940303	0.958997	0.95798	1
Q91X20	Q91X20	Set1/Ash2 histone methyltransferase complex subunit ASH2	Ash2l	S	618	0.547552	0.930783	0.069702	0	0	1	0	0.98081	0
Q61024	Q61024	Asparagine synthetase [glutamine-hydrolyzing]	Asns	S	218	0.207676	0.847804	-0.119278	1	0.958881	0.772215	0.731509	0.96766	0
Q8VBT9	Q8VBT9	Tether containing UBX domain for GLUT4	Aspscr1	S	193	0.236043	0.865403	0.0620532	0	0.974246	0	0	0.96441	1
Q8VBT9	Q8VBT9	Tether containing UBX domain for GLUT4	Aspscr1	S	494	0.915183	0.951604	-0.00609519	0.994742	1	0.796533	0	0.972115	0.998637
Q8VBT9	Q8VBT9	Tether containing UBX domain for GLUT4	Aspscr1	S	496	0.915849	0.9517	-0.00609519	0.994742	1	0.796533	0	0.972115	0.998637
Q8VBT9	Q8VBT9	Tether containing UBX domain for GLUT4	Aspscr1	S	279	0.0321166	0.279629	0.146709	0	0.693335	1	0.96524	0.802327	0.961173
Q8BZ32	Q8BZ32	Putative Polycomb group protein ASXL2	Asxl2	S	653	0.625494	0.936093	-0.0124715	1	0.930084	0.91394	0.818822	0.946963	0.929419
Q8BZ32	Q8BZ32	Putative Polycomb group protein ASXL2	Asxl2	S	477	0.227789	0.859675	0.0728211	0	0.855758	1	0.886978	0.831014	0.917052
Q9D5T0	Q9D5T0	ATPase family AAA domain-containing protein 1	Atad1	S	322	0.786154	0.94599	-0.005913	0.994574	0.965111	0.950937	0.945752	1	0.941682
P16951	P16951	Cyclic AMP-dependent transcription factor ATF-2	Atf2	S	94	0.738328	0.943433	-0.00729348	0.938279	0.975703	1	0.935221	0.908646	0.972062
Q8R0S1	Q8R0S1	Cyclic AMP-dependent transcription factor ATF-7	Atf7	S	246	0.0107855	0.0248685	-0.214406	0.942884	1	0	0	0.672238	0
Q8R0S1	Q8R0S1	Cyclic AMP-dependent transcription factor ATF-7	Atf7	T	326	0.0970962	0.687635	-0.146196	0.719257	0	0.988606	1	0	0.157421
Q8R0S1	Q8R0S1	Cyclic AMP-dependent transcription factor ATF-7	Atf7	T	53	0.205013	0.846368	0.034163	0.835917	0.917457	1	0.999619	0.916489	0.955236
Q7TT18	Q7TT18	Activating transcription factor 7-interacting protein 1	Atf7ip	S	951	0.886991	0.95076	0.0117216	1	0.82763	0.867455	0	0.909595	0.9627
Q7TT18	Q7TT18	Activating transcription factor 7-interacting protein 1	Atf7ip	S	112	0.645855	0.937595	-0.0071292	1	0.993974	0.996511	0.984682	0.983443	0.988097
Q7TT18	Q7TT18	Activating transcription factor 7-interacting protein 1	Atf7ip	S	591	0.523959	0.925174	0.0787161	0	0	0	0.941131	1	0
Q7TT18	Q7TT18	Activating transcription factor 7-interacting protein 1	Atf7ip	S	593	0.390389	0.908695	-0.103082	0.994244	0.958331	0.985349	0	0	1
Q8C0J2	Q8C0J2	Autophagy-related protein 16-1	Atg16l1	S	269	0.529162	0.927676	0.0220095	0.760952	0.85098	0.990694	1	0.941068	0.771649
Q80XK6	Q80XK6	Autophagy-related protein 2 homolog B	Atg2b	S	839	0.0322957	0.276711	-0.0955592	0.982985	1	0.774106	0.9021	0.805355	0.846646
Q8BGE6	Q8BGE6	Cysteine protease ATG4B	Atg4b	S	383	0.431748	0.915703	0.0242572	0.976362	0.855274	0.978078	1	0.953403	0.963753
O35126	O35126	Atrophin-1	Atn1	S	34	0.882334	0.949987	-0.00952875	0	0.558099	0.585071	0.761412	1	0.360006
O35126	O35126	Atrophin-1	Atn1	S	630	0.487251	0.922693	-0.0480615	1	0.998124	0.995742	0	0.976733	0.79144
O35126	O35126	Atrophin-1	Atn1	S	77	0.020943	0.127595	0.0820314	0.733237	0.840406	0.8858	0.92957	0.959263	1
O35126	O35126	Atrophin-1	Atn1	S	79	0.020943	0.127595	0.0820314	0.733237	0.840406	0.8858	0.92957	0.959263	1
O54827	O54827	Probable phospholipid-transporting ATPase VA	Atp10a	S	470	0.150792	0.799029	0.0251618	0.939645	0.955426	0.971352	0.969097	1	0.997696
Q5XF89	Q5XF89	Probable cation-transporting ATPase 13A3	Atp13a3	S	813	0.582674	0.932674	-0.0100469	1	0.97438	0.921203	0.932127	0.955301	0.987508
O55143	O55143	Sarcoplasmic/endoplasmic reticulum calcium ATPase 2	Atp2a2	S	663	0.62501	0.936058	0.0158477	0.889802	1	0.952011	0.995518	0.953774	0.986442
G5E829	G5E829	Plasma membrane calcium-transporting ATPase 1	Atp2b1	S	1155	0.248667	0.869463	-0.0212462	0.980203	1	0.994655	0.998532	0.971447	0.950017
G5E829	G5E829	Plasma membrane calcium-transporting ATPase 1	Atp2b1	S	17	0.309445	0.890632	-0.0367431	1	0.965731	0.904414	0.77123	0.902564	0.937402
G5E829	G5E829	Plasma membrane calcium-transporting ATPase 1	Atp2b1	S	1139	0.272231	0.878468	-0.118289	0.901794	1	0	0	0.977538	0
G5E829	G5E829	Plasma membrane calcium-transporting ATPase 1	Atp2b1	S	1140	0.272558	0.878666	-0.118861	0.901794	1	0	0	0.977538	0
G5E829	G5E829	Plasma membrane calcium-transporting ATPase 1	Atp2b1	T	1165	0.52344	0.927092	0.0191866	0.977702	0.922095	0.996104	0.90856	0.961378	1
G5E829	G5E829	Plasma membrane calcium-transporting ATPase 1	Atp2b1	S	1155	0.0646961	0.567093	0.0474787	0.870118	0.93114	0.993293	1	0.973469	0.986782
G5E829	G5E829	Plasma membrane calcium-transporting ATPase 1	Atp2b1	T	1165	0.0646961	0.567093	0.0474787	0.870118	0.93114	0.993293	1	0.973469	0.986782
P15920	P15920	V-type proton ATPase 116 kDa subunit a isoform 2	Atp6v0a2	S	695	0.286878	0.883793	-0.026087	0.95903	0.969482	1	0.99505	0.959807	0.891085
Q64430	Q64430	Copper-transporting ATPase 1	Atp7a	S	1454	0.690853	0.941187	0.0129161	0.888411	0.840481	0	0	0.801478	1
Q64430	Q64430	Copper-transporting ATPase 1	Atp7a	S	356	0.583537	0.932594	0.0677234	0.965303	0	0	1	0.843578	0.926766
Q61687	Q61687	Transcriptional regulator ATRX	Atrx	S	717	0.0718314	0.604377	-0.0755755	0.883869	1	0.793884	0.779587	0.849601	0.741541
Q61687	Q61687	Transcriptional regulator ATRX	Atrx	S	719	0.279373	0.882117	-0.0509078	0.778841	1	0	0	0.769804	0.799032
Q61687	Q61687	Transcriptional regulator ATRX	Atrx	S	590	0.753244	0.94426	0.00769262	0.876008	0.915326	1	0.927621	0.916249	0.899691
Q61687	Q61687	Transcriptional regulator ATRX	Atrx	S	801	0.999392	0.954852	5.72807e-05	1	0.660358	0.701402	0.723569	0.982049	0.678568
Q61687	Q61687	Transcriptional regulator ATRX	Atrx	S	854	0.657935	0.93829	-0.0208579	0.857597	0.937862	0.913052	0.868605	0	1
Q61687	Q61687	Transcriptional regulator ATRX	Atrx	S	315	0.113515	0.739845	0.0293664	0.937861	0.948158	0.942757	0.95445	0.985539	1
Q61687	Q61687	Transcriptional regulator ATRX	Atrx	S	92	0.408696	0.91216	0.0133244	0.975089	0.978239	0.981061	0.990924	0.990182	1
Q61687	Q61687	Transcriptional regulator ATRX	Atrx	S	1287	0.253019	0.871248	0.0230146	0.936855	0.9284	0.952299	0.986494	0.954572	1
Q61687	Q61687	Transcriptional regulator ATRX	Atrx	S	626	0.411491	0.912578	-0.0173995	1	0.97453	0.996399	0.940423	0.959925	0.957451
Q61687	Q61687	Transcriptional regulator ATRX	Atrx	S	1290	0.253019	0.871248	0.0230146	0.936855	0.9284	0.952299	0.986494	0.954572	1
Q61687	Q61687	Transcriptional regulator ATRX	Atrx	S	1335	0.0149374	0.0585628	0.272494	0	0	0.816089	0	0.980485	1
Q61687	Q61687	Transcriptional regulator ATRX	Atrx	S	1339	0.0121545	0.0362536	0.272493	0	0	0.816089	0	0.980485	1
Q61687	Q61687	Transcriptional regulator ATRX	Atrx	Y	1985	0.537637	0.928088	0.0388435	0.84368	0	1	0	0.905181	0.789934
Q61687	Q61687	Transcriptional regulator ATRX	Atrx	S	912	0.884277	0.949869	-0.0264961	0.997287	0	0	0	1	0
Q61687	Q61687	Transcriptional regulator ATRX	Atrx	S	1512	0.561688	0.930212	-0.080173	0.811767	0.898006	1	0	0	0.932866
Q61687	Q61687	Transcriptional regulator ATRX	Atrx	S	1290	0.325404	0.894607	-0.165405	0.984287	0.97889	0	1	0.96593	0
P54254	P54254	Ataxin-1	Atxn1	S	213	0.321187	0.892066	0.0789951	0.961018	0	0	0.981403	0.992432	1
P0C7T6	P0C7T6	Ataxin-1-like	Atxn1l	T	328	0.364307	0.903987	-0.0148608	0.986562	1	0.991524	0.996442	0.974485	0.96158
O70305	O70305	Ataxin-2	Atxn2	S	697	0.304838	0.888956	-0.0575729	0.97283	1	0.829255	0	0.900611	0.823447
O70305	O70305	Ataxin-2	Atxn2	S	435	0.348154	0.900401	-0.0381177	1	0.855468	0.873033	0.810481	0.878197	0.851283
O70305	O70305	Ataxin-2	Atxn2	T	710	0.252008	0.87092	-0.0205357	0.974212	1	0.985098	0.994191	0.954535	0.958667
Q7TQH0	Q7TQH0	Ataxin-2-like protein	Atxn2l	S	597	0.0712278	0.602052	-0.0364004	0.997509	1	0.959231	0.944355	0.930526	0.951663
Q7TQH0	Q7TQH0	Ataxin-2-like protein	Atxn2l	S	109	0.83964	0.948558	-0.00317626	0.992341	0.990909	0.989043	1	0.980105	0.994205
Q7TQH0	Q7TQH0	Ataxin-2-like protein	Atxn2l	S	637	0.735856	0.942699	-0.0385479	1	0	0	0	0.931622	0
Q7TQH0	Q7TQH0	Ataxin-2-like protein	Atxn2l	T	505	0.779746	0.945664	0.00434152	0.956338	0.969242	1	0.997146	0.964195	0.975656
Q7TQH0	Q7TQH0	Ataxin-2-like protein	Atxn2l	S	27	0.337807	0.896518	0.0393816	0.956476	0	0	0	1	0.905455
Q7TQH0	Q7TQH0	Ataxin-2-like protein	Atxn2l	S	562	0.647473	0.937691	0.0310483	0.75124	1	0.941588	0.916615	0.935717	0.903064
Q7TQH0	Q7TQH0	Ataxin-2-like protein	Atxn2l	S	333	0.906095	0.951186	-0.00464955	0	0.926556	0.824088	1	0	0.918408
Q7TQH0	Q7TQH0	Ataxin-2-like protein	Atxn2l	S	337	0.370433	0.90447	-0.169995	0.965552	0.854396	1	0	0	0.884445
Q7TQH0	Q7TQH0	Ataxin-2-like protein	Atxn2l	S	499	0.971378	0.953867	0.00127264	0.98603	0.884669	1	0.921311	0.900872	0.974095
Q7TQH0	Q7TQH0	Ataxin-2-like protein	Atxn2l	S	683	0.381978	0.90733	-0.0980084	0.925631	0.926338	0.753528	0.994002	1	0
P70295	P70295	Ancient ubiquitous protein 1	Aup1	S	290	0.451509	0.918069	0.0369874	1	0	0	0	0.958931	0.93142
O35625	O35625	Axin-1	Axin1	S	75	0.10577	0.72019	0.0878485	0	0.867101	0	0	1	0.907668
Q00993	Q00993	Tyrosine-protein kinase receptor UFO	Axl	Y	860	0.34281	0.899298	0.0156214	0.974849	0.956228	0.787842	0.780044	0.991431	1
Q3UI43	Q3UI43	BRISC and BRCA1-A complex member 1	Babam1	S	8	0.495378	0.924044	-0.0143897	0.987929	1	0.941636	0.999204	0.984846	0.952749
Q61337	Q61337	Bcl2-associated agonist of cell death	Bad	S	112	0.342288	0.898879	0.0924402	0	0.873931	0.859069	1	0.944193	0.75183
Q61337	Q61337	Bcl2-associated agonist of cell death	Bad	S	155	0.167771	0.816932	0.0390847	0.826035	0.879644	0.932136	1	0.900662	0.942666
Q9JLV1	Q9JLV1	BAG family molecular chaperone regulator 3	Bag3	S	404	0.151171	0.79901	0.0473318	0.749551	0.870664	0.98196	1	0.924115	0.879935
Q9JLV1	Q9JLV1	BAG family molecular chaperone regulator 3	Bag3	S	274	0.603805	0.934414	-0.0190359	0.933108	1	0.844079	0.939371	0.884074	0.984013
Q9JLV1	Q9JLV1	BAG family molecular chaperone regulator 3	Bag3	S	297	0.154898	0.803323	0.0503475	0.895194	0.862516	1	0.838198	0.986981	0.995793
Q9JLV1	Q9JLV1	BAG family molecular chaperone regulator 3	Bag3	S	390	0.367759	0.904624	0.0224261	0.987669	0.921595	0.953699	0.91532	0.980076	1
Q9JLV1	Q9JLV1	BAG family molecular chaperone regulator 3	Bag3	T	560	0.107653	0.726671	-0.0401337	1	0.95534	0.949642	0.970298	0.880112	0.931877
Q9Z1R2	Q9Z1R2	Large proline-rich protein BAG6	Bag6	S	995	0.106165	0.723078	0.0437728	0.869812	0.856222	0.948815	0.913459	0.909755	1
Q9Z1R2	Q9Z1R2	Large proline-rich protein BAG6	Bag6	S	1139	0.355481	0.902081	-0.0192125	0.992506	1	0.997429	0.987827	0.934003	0.992634
Q9Z1R2	Q9Z1R2	Large proline-rich protein BAG6	Bag6	T	985	0.0972809	0.699905	0.12368	0	0.853597	0.782284	0.790158	0.8951	1
Q497V6	Q497V6	Bromo adjacent homology domain-containing 1 protein	Bahd1	S	182	0.415628	0.913219	0.0597687	0	0.941844	0.940553	0	0.871437	1
Q497V6	Q497V6	Bromo adjacent homology domain-containing 1 protein	Bahd1	S	178	0.332551	0.896739	-0.0654713	0.895433	0.925719	0.931859	1	0	0.950618
Q8BKX1	Q8BKX1	Brain-specific angiogenesis inhibitor 1-associated protein 2	Baiap2	T	341	0.596538	0.93312	-0.025054	1	0.9062	0.909635	0	0.944615	0.835808
Q8BKX1	Q8BKX1	Brain-specific angiogenesis inhibitor 1-associated protein 2	Baiap2	T	361	0.263572	0.875821	0.0355481	0.946083	0.833885	0.704573	0	1	0.945767
Q9DBJ3	Q9DBJ3	Brain-specific angiogenesis inhibitor 1-associated protein 2-like protein 1	Baiap2l1	S	281	0.498513	0.924373	-0.0277579	0.897189	1	0.935972	0.995282	0.836497	0.964693
Q99PU7	Q99PU7	Ubiquitin carboxyl-terminal hydrolase BAP1	Bap1	S	581	0.0568791	0.507185	0.120311	0	0	0.879268	0	0.86	1
Q9DCT6	Q9DCT6	Chromatin complexes subunit BAP18	Bap18	S	96	0.912019	0.951623	0.00627797	0.825183	0.988993	1	0.703939	0.903276	0.939376
Q91XV3	Q91XV3	Brain acid soluble protein 1	Basp1	S	92	0.295932	0.88674	-0.0193118	0.985662	1	0.964446	0.939662	0.947772	0.973637
Q91XV3	Q91XV3	Brain acid soluble protein 1	Basp1	S	131	0.774012	0.945367	-0.00604813	0.971255	1	0.945832	0.997154	0.949038	0.999003
Q91XV3	Q91XV3	Brain acid soluble protein 1	Basp1	T	31	0.805239	0.946934	0.0137863	0.921388	0.980326	0.502445	0.243221	0.952384	1
Q91XV3	Q91XV3	Brain acid soluble protein 1	Basp1	T	36	0.459101	0.919576	-0.0144799	0.978934	0.9974	1	0.954997	0.961161	0.969789
O88379	O88379	Bromodomain adjacent to zinc finger domain protein 1A	Baz1a	T	732	0.346229	0.900057	-0.0170995	0.979706	0.988693	0.992864	1	0.945955	0.975282
Q9Z277	Q9Z277	Tyrosine-protein kinase BAZ1B	Baz1b	S	1464	0.994406	0.95468	-0.000117248	0.980512	0.999087	0.983142	1	0.980722	0.998525
Q9Z277	Q9Z277	Tyrosine-protein kinase BAZ1B	Baz1b	S	359	0.546422	0.92888	-0.0873478	1	0	0	0.88299	0.760372	0
Q9Z277	Q9Z277	Tyrosine-protein kinase BAZ1B	Baz1b	S	361	0.0953112	0.694145	0.0494732	0.849908	0.950994	0.886891	0.885182	0.989977	1
Q9Z277	Q9Z277	Tyrosine-protein kinase BAZ1B	Baz1b	S	1338	0.174235	0.822737	-0.0801725	0.975575	0.999682	0.766747	1	0.891678	0.777743
Q91YE5	Q91YE5	Bromodomain adjacent to zinc finger domain protein 2A	Baz2a	S	1174	0.874433	0.949886	-0.00145425	0.711489	0.639692	1	0.662594	0	0.761769
Q91YE5	Q91YE5	Bromodomain adjacent to zinc finger domain protein 2A	Baz2a	S	1042	0.185772	0.832433	0.09624	0.970272	0.636974	0.773175	0.699039	0.98897	1
Q91YE5	Q91YE5	Bromodomain adjacent to zinc finger domain protein 2A	Baz2a	T	1041	0.565285	0.931157	0.0119537	0.970272	0.971285	0.773175	0.699039	0.98897	1
Q8VBW5	Q8VBW5	HMG box transcription factor BBX	Bbx	S	811	0.201736	0.844155	0.041137	0.816541	0.937027	0.975884	1	0.955781	0.947487
Q3TQI7	Q3TQI7	Uncharacterized protein C9orf78 homolog	BC005624	S	261	0.223216	0.857095	0.0235208	0.937075	0.972397	0.998554	1	0.987496	0.98903
Q3TQI7	Q3TQI7	Uncharacterized protein C9orf78 homolog	BC005624	T	253	0.138724	0.781335	-0.182783	1	0.92565	0	0	0	0.892813
Q3TQI7	Q3TQI7	Uncharacterized protein C9orf78 homolog	BC005624	S	15	0.624887	0.935145	0.0349857	0.896727	0.919558	0.933071	0	0.964719	1
Q3TQI7	Q3TQI7	Uncharacterized protein C9orf78 homolog	BC005624	S	17	0.623486	0.934851	0.0349857	0.896727	0.919558	0.933071	0	0.964719	1
Q61140	Q61140	Breast cancer anti-estrogen resistance protein 1	Bcar1	T	330	0.291904	0.885342	0.04973	0.756677	0.935471	0.908468	0.908162	1	0.881314
Q61140	Q61140	Breast cancer anti-estrogen resistance protein 1	Bcar1	T	389	0.831323	0.948171	-0.010746	0.877972	0.999982	0.818334	1	0.884664	0.955707
Q61140	Q61140	Breast cancer anti-estrogen resistance protein 1	Bcar1	Y	253	0.86431	0.949607	0.0147501	0.840802	1	0.997955	0	0.945937	0.956998
Q61140	Q61140	Breast cancer anti-estrogen resistance protein 1	Bcar1	Y	391	0.54313	0.929089	0.0119513	0.940148	0.998288	0.949857	0.974693	0.985514	1
Q61140	Q61140	Breast cancer anti-estrogen resistance protein 1	Bcar1	Y	414	0.314361	0.892007	0.0356328	0.874406	0.994489	0.893209	0.952815	1	0.987453
P50136	P50136	2-oxoisovalerate dehydrogenase subunit alpha, mitochondrial	Bckdha	S	334	0.90116	0.95035	0.011356	0.850298	0	0.976504	0.96637	1	0
P50136	P50136	2-oxoisovalerate dehydrogenase subunit alpha, mitochondrial	Bckdha	S	344	0.166822	0.815788	-0.0800375	1	0.967455	0.981987	0.741296	0.837049	0.83854
P50136	P50136	2-oxoisovalerate dehydrogenase subunit alpha, mitochondrial	Bckdha	T	335	0.288445	0.8843	-0.115968	0.897783	1	0	0	0	0.981525
P50136	P50136	2-oxoisovalerate dehydrogenase subunit alpha, mitochondrial	Bckdha	S	334	0.394107	0.910066	-0.0589005	0.952189	0.919897	0	0	0	1
O54918	O54918	Bcl-2-like protein 11	Bcl2l11	S	73	0.708034	0.942045	-0.0113156	0	0	1	0.767065	0.661506	0
P59017	P59017	Bcl-2-like protein 13	Bcl2l13	S	343	0.687948	0.940411	-0.0332014	0.732159	1	0.965242	0.926172	0.656666	0.954247
P59017	P59017	Bcl-2-like protein 13	Bcl2l13	S	387	0.218081	0.854198	-0.172735	0.943019	1	0.9827	0.96089	0.969195	0
P59017	P59017	Bcl-2-like protein 13	Bcl2l13	T	342	0.568811	0.9311	-0.0646332	0.702364	1	0	0	0	0.972769
P59017	P59017	Bcl-2-like protein 13	Bcl2l13	T	389	0.958772	0.953409	-0.00147459	0.879362	0.99819	0.947698	1	0.975127	0.895679
P59017	P59017	Bcl-2-like protein 13	Bcl2l13	S	343	0.61479	0.935058	0.0560954	0.680461	0.938628	1	0	0.938724	0.895645
P59017	P59017	Bcl-2-like protein 13	Bcl2l13	S	347	0.468287	0.920721	-0.0745359	0.86561	0.919622	0.976012	0.830674	1	0.489296
P59017	P59017	Bcl-2-like protein 13	Bcl2l13	T	342	0.753979	0.943685	0.0429206	0.88215	0	0	1	0.790967	0.733474
P59017	P59017	Bcl-2-like protein 13	Bcl2l13	T	345	0.81711	0.947327	-0.0225905	0.935025	0.960236	1	0	0.851633	0.954936
P41183	P41183	B-cell lymphoma 6 protein homolog	Bcl6	S	396	0.849354	0.94872	-0.0215894	0.966941	0	0.993498	1	0.98731	0
P41183	P41183	B-cell lymphoma 6 protein homolog	Bcl6	S	405	0.633326	0.936346	0.04311	0	0.911934	0.915853	1	0.665184	0.936945
Q921K9	Q921K9	B-cell CLL/lymphoma 7 protein family member B	Bcl7b	S	122	0.358662	0.902287	0.088962	0.967687	0	0.852318	0.837256	1	0.82918
Q9D219	Q9D219	B-cell CLL/lymphoma 9 protein	Bcl9	S	686	0.16502	0.814009	0.0738863	0.893529	0.718187	0.810333	0.852071	0.877418	1
Q9D219	Q9D219	B-cell CLL/lymphoma 9 protein	Bcl9	T	315	0.879717	0.950307	-0.00301113	0.982787	0.945907	0.982859	1	0.994837	0.919473
Q67FY2	Q67FY2	B-cell CLL/lymphoma 9-like protein	Bcl9l	S	21	0.53039	0.927824	0.012659	0.934821	0.98489	0.871981	0.86506	0.964434	1
Q67FY2	Q67FY2	B-cell CLL/lymphoma 9-like protein	Bcl9l	S	747	0.104352	0.718959	-0.0311364	0.976405	1	0.947628	0.954051	0.941003	0.933867
Q67FY2	Q67FY2	B-cell CLL/lymphoma 9-like protein	Bcl9l	S	118	0.204985	0.845958	-0.125682	0	0.923584	1	0.980071	0	0.471365
Q67FY2	Q67FY2	B-cell CLL/lymphoma 9-like protein	Bcl9l	S	21	0.20083	0.84357	0.0228817	0.943249	0.964662	0.981059	0.9829	0.984567	1
Q67FY2	Q67FY2	B-cell CLL/lymphoma 9-like protein	Bcl9l	S	25	0.20083	0.84357	0.0228817	0.943249	0.964662	0.981059	0.9829	0.984567	1
Q8K019	Q8K019	Bcl-2-associated transcription factor 1	Bclaf1	S	383	0.650737	0.937936	-0.00727287	1	0.993282	0.982839	0.991658	0.994745	0.979699
Q8K019	Q8K019	Bcl-2-associated transcription factor 1	Bclaf1	S	177	0.533753	0.928173	0.0104606	0.948555	0.954488	1	0.972085	0.962254	0.977699
Q8K019	Q8K019	Bcl-2-associated transcription factor 1	Bclaf1	S	267	0.941347	0.95276	0.00184656	0.915563	0.964658	1	0.957043	0.96331	0.922075
Q8K019	Q8K019	Bcl-2-associated transcription factor 1	Bclaf1	S	646	0.0348442	0.314135	-0.12883	0.957232	0.958045	1	0.813464	0	0.447599
Q8K019	Q8K019	Bcl-2-associated transcription factor 1	Bclaf1	S	183	0.23266	0.861961	-0.0473756	0.871108	0.968167	1	0.882053	0.868046	0.791053
Q8K019	Q8K019	Bcl-2-associated transcription factor 1	Bclaf1	S	198	0.00661509	0.00529545	0.172221	0	0	0.794153	0.91472	1	0.867569
Q8K019	Q8K019	Bcl-2-associated transcription factor 1	Bclaf1	S	289	0.138807	0.785611	-0.129188	0.912596	0	1	0.889277	0	0
Q8K019	Q8K019	Bcl-2-associated transcription factor 1	Bclaf1	T	400	0.0141947	0.0496596	0.226126	0	0	0	0	1	0.735144
Q8K019	Q8K019	Bcl-2-associated transcription factor 1	Bclaf1	S	284	0.181081	0.827286	0.206957	0.769157	0	0	0.90353	1	0.88066
Q8K019	Q8K019	Bcl-2-associated transcription factor 1	Bclaf1	S	286	0.361048	0.900577	0.071824	0	0	1	0.787409	0	0.925083
Q8K019	Q8K019	Bcl-2-associated transcription factor 1	Bclaf1	S	529	0.347553	0.900249	-0.0685132	0.882027	0.940453	0.963652	1	0.961976	0.547598
Q8K019	Q8K019	Bcl-2-associated transcription factor 1	Bclaf1	S	289	0.183746	0.831125	0.0313789	0.967775	0.915582	0.898818	0.86682	0.982639	1
Q8K019	Q8K019	Bcl-2-associated transcription factor 1	Bclaf1	Y	283	0.478057	0.922106	-0.0868971	1	0.971077	0.953298	0	0.791775	0.887695
Q8K019	Q8K019	Bcl-2-associated transcription factor 1	Bclaf1	S	510	0.582181	0.93264	-0.0085484	0.988931	1	0.992074	0.992554	0.982704	0.982537
Q8K019	Q8K019	Bcl-2-associated transcription factor 1	Bclaf1	S	494	0.687895	0.94041	-0.00708697	0.971612	1	0.983926	0.979588	0.965915	0.985685
Q8K019	Q8K019	Bcl-2-associated transcription factor 1	Bclaf1	S	656	0.507038	0.925381	-0.0105605	0.989507	0.989622	0.990593	1	0.972982	0.981458
Q8K019	Q8K019	Bcl-2-associated transcription factor 1	Bclaf1	S	658	0.360551	0.902191	-0.210316	0	0.865468	1	0	0	0
Q8K019	Q8K019	Bcl-2-associated transcription factor 1	Bclaf1	S	688	0.0928543	0.686525	-0.12951	0.857008	0.915211	0.926804	1	0.789368	0.464376
A2AG58	A2AG58	Uncharacterized protein CXorf23 homolog	Bclaf3	S	205	0.754327	0.94432	0.00538594	0.9216	0.946652	0.988263	1	0.930358	0.955639
Q8CGN4	Q8CGN4	BCL-6 corepressor	Bcor	S	423	0.934421	0.952416	0.00643155	0.95014	0.947934	0	0.927062	1	0.924615
Q8CGN4	Q8CGN4	BCL-6 corepressor	Bcor	S	1131	0.550054	0.928798	-0.0489268	0	1	0	0	0.884247	0
Q6PAJ1	Q6PAJ1	Breakpoint cluster region protein	Bcr	S	475	0.791996	0.946544	-0.0186632	0.948908	0	0.883614	0	1	0
O35623	O35623	BET1 homolog	Bet1	S	50	0.492841	0.923782	-0.0107051	1	0.992155	0.962332	0.967279	0.981275	0.97973
Q8R079	Q8R079	Bifunctional apoptosis regulator	Bfar	S	207	0.346174	0.900834	0.0514769	0	0	1	0.968984	0	0.700023
Q8BR07	Q8BR07	Protein bicaudal D homolog 1	Bicd1	Y	462	0.842363	0.948086	-0.0176108	1	0	0	0	0	0.960944
Q921C5	Q921C5	Protein bicaudal D homolog 2	Bicd2	S	331	0.0938039	0.688231	-0.127436	0.372052	0	1	0.890963	0.219212	0.177102
Q921C5	Q921C5	Protein bicaudal D homolog 2	Bicd2	S	578	0.772662	0.945296	0.00793467	0.951144	0.893985	0.879878	0.837365	0.8804	1
O08539	O08539	Myc box-dependent-interacting protein 1	Bin1	S	296	0.196093	0.840411	-0.121265	1	0.950849	0.981938	0.946743	0	0.956746
O08539	O08539	Myc box-dependent-interacting protein 1	Bin1	S	298	0.351648	0.901192	0.0314	0.869916	0.986945	0.961242	0.993172	1	0.96085
O08539	O08539	Myc box-dependent-interacting protein 1	Bin1	S	304	0.745558	0.943838	0.00520313	0.979425	0.981206	0.973599	0.969882	0.976886	1
O08539	O08539	Myc box-dependent-interacting protein 1	Bin1	S	321	0.486088	0.923018	0.102503	0.821404	0	0	1	0.703405	0.953321
O08539	O08539	Myc box-dependent-interacting protein 1	Bin1	S	324	0.253315	0.871367	-0.0465054	0.982415	1	0.921526	0.979252	0.869321	0.984204
O08539	O08539	Myc box-dependent-interacting protein 1	Bin1	S	332	0.0800852	0.641781	-0.0331828	0.979163	0.974217	0.994562	1	0.911908	0.926559
O08539	O08539	Myc box-dependent-interacting protein 1	Bin1	S	286	0.898471	0.95063	-0.001333	0.838612	0.674726	0	0.656844	1	0
O08539	O08539	Myc box-dependent-interacting protein 1	Bin1	S	296	0.994965	0.954699	0.000111337	0.985406	0.968017	0.750193	0.740256	1	0.953859
O08539	O08539	Myc box-dependent-interacting protein 1	Bin1	S	298	0.994965	0.954699	0.000111337	0.985406	0.968017	0.750193	0.740256	1	0.953859
O08539	O08539	Myc box-dependent-interacting protein 1	Bin1	S	304	0.845595	0.94882	0.0121346	0.74756	0.968017	0.750193	0.740256	1	0.763116
Q62210	Q62210	Baculoviral IAP repeat-containing protein 2	Birc2	S	152	0.855256	0.949305	-0.0197511	1	0.767711	0	0.925925	0.863325	0.833038
Q62210	Q62210	Baculoviral IAP repeat-containing protein 2	Birc2	S	153	0.269557	0.878031	-0.103535	0.992721	0.95673	0	0	1	0
Q62210	Q62210	Baculoviral IAP repeat-containing protein 2	Birc2	S	123	0.0495732	0.461137	0.0706581	0.864776	0	0.732694	0	0.967442	1
O88738	O88738	Baculoviral IAP repeat-containing protein 6	Birc6	S	483	0.584895	0.932866	-0.0114965	0.969532	1	0.976041	0.919621	0.943716	0.981821
O88738	O88738	Baculoviral IAP repeat-containing protein 6	Birc6	S	2978	0.142	0.787283	-0.0550273	1	0.974578	0.871758	0.725348	0.883163	0.883471
Q91Z96	Q91Z96	BMP-2-inducible protein kinase	Bmp2k	S	1087	0.0706549	0.59734	0.182706	0	0	0	1	0.969963	0.97239
Q91Z96	Q91Z96	BMP-2-inducible protein kinase	Bmp2k	S	908	0.531625	0.927954	-0.0117399	0.973065	0.943735	0.968874	1	0.927607	0.949958
Q8BMQ3	Q8BMQ3	Zinc finger protein basonuclin-2	Bnc2	S	431	0.99357	0.954651	0.000141943	0.969509	0.975558	0.740219	0.740467	1	0.945675
O54940	O54940	BCL2/adenovirus E1B 19 kDa protein-interacting protein 2	Bnip2	S	114	0.732637	0.943111	-0.00580054	0.970326	1	0.984658	0.979613	0.972426	0.980873
O55003	O55003	BCL2/adenovirus E1B 19 kDa protein-interacting protein 3	Bnip3	S	88	0.239745	0.865386	0.0418468	0.872317	0.878206	0.89491	0.901243	0.879098	1
O55003	O55003	BCL2/adenovirus E1B 19 kDa protein-interacting protein 3	Bnip3	T	86	0.185883	0.832511	-0.122866	0.988008	1	0.989922	0.988794	0.975423	0.623675
Q9Z2F7	Q9Z2F7	BCL2/adenovirus E1B 19 kDa protein-interacting protein 3-like	Bnip3l	S	119	0.226542	0.858777	0.0261599	0.907614	0.894131	0.972925	1	0.963083	0.919043
Q9Z2F7	Q9Z2F7	BCL2/adenovirus E1B 19 kDa protein-interacting protein 3-like	Bnip3l	S	61	0.0913755	0.681855	-0.0677131	1	0.861288	0.790886	0.842524	0.802414	0.809554
Q9Z2F7	Q9Z2F7	BCL2/adenovirus E1B 19 kDa protein-interacting protein 3-like	Bnip3l	S	62	0.0913755	0.681855	-0.0677131	1	0.861288	0.790886	0.842524	0.802414	0.809554
Q9Z2F7	Q9Z2F7	BCL2/adenovirus E1B 19 kDa protein-interacting protein 3-like	Bnip3l	S	63	0.0913755	0.681855	-0.0677131	1	0.861288	0.790886	0.842524	0.802414	0.809554
Q9Z2F7	Q9Z2F7	BCL2/adenovirus E1B 19 kDa protein-interacting protein 3-like	Bnip3l	S	64	0.0913755	0.681855	-0.0677131	1	0.861288	0.790886	0.842524	0.802414	0.809554
E9Q6J5	E9Q6J5	NA	Bod1l	S	1676	0.285419	0.883283	0.0307416	0.839836	0.93996	0.829225	0.942076	0.943491	1
E9Q6J5	E9Q6J5	NA	Bod1l	S	3010	0.251962	0.870825	-0.0766861	0.9627	1	0.974505	0.996056	0.688651	0.988676
E9Q6J5	E9Q6J5	NA	Bod1l	T	2890	0.200762	0.844104	0.0938455	0	0.860224	0.956581	1	0.851931	0.899783
E9Q6J5	E9Q6J5	NA	Bod1l	S	2001	0.0325247	0.280181	-0.0576827	0.984816	1	0.920985	0.956835	0.923056	0.889814
E9Q6J5	E9Q6J5	NA	Bod1l	S	237	0.858592	0.948562	0.00835517	0.844378	0	0.732408	0.698404	1	0
E9Q6J5	E9Q6J5	NA	Bod1l	S	795	0.267239	0.87687	0.0540008	0.692809	0.76742	0.919983	1	0.736798	0.932853
E9Q6J5	E9Q6J5	NA	Bod1l	S	656	0.0917602	0.679449	0.0933766	0.790583	0	1	0.974793	0.841905	0.890522
E9Q6J5	E9Q6J5	NA	Bod1l	S	480	0.312629	0.891526	-0.0585135	1	0.691699	0	0.709705	0.794991	0
E9Q6J5	E9Q6J5	NA	Bod1l	T	1072	0.441521	0.915778	0.0330305	0	0	1	0.927903	0	0.860729
Q9D6W8	Q9D6W8	Uncharacterized protein C17orf59 homolog	Borcs6	T	201	0.446509	0.918309	0.0357423	0	0.825447	0.995766	1	0.803245	0.75093
P28028	P28028	Serine/threonine-protein kinase B-raf	Braf	S	787	0.304967	0.888376	-0.132925	0.919957	0	1	0	0	0
P28028	P28028	Serine/threonine-protein kinase B-raf	Braf	S	483	0.602946	0.93435	-0.0128415	1	0.92756	0.916944	0.907582	0.962532	0.924636
P28028	P28028	Serine/threonine-protein kinase B-raf	Braf	S	484	0.635103	0.937303	0.0592747	0	1	0.909467	0.985999	0.728037	0.932358
P28028	P28028	Serine/threonine-protein kinase B-raf	Braf	S	766	0.491579	0.923632	0.0110588	0.984918	0.965909	0.963658	0.968856	1	0.990718
Q8C3R1	Q8C3R1	BRCA1-associated ATM activator 1	Brat1	S	684	0.294029	0.886145	0.124012	1	0	0.910879	0.991762	0.942265	0.974539
Q8C3R1	Q8C3R1	BRCA1-associated ATM activator 1	Brat1	S	685	0.356351	0.90222	-0.0297795	1	0.987042	0.989797	0.871328	0.96388	0.919138
Q7JJ13	Q7JJ13	Bromodomain-containing protein 2	Brd2	S	297	0.48781	0.92316	0.0151805	0.969718	0.916057	0.976068	0.965016	1	0.943699
Q8K2F0	Q8K2F0	Bromodomain-containing protein 3	Brd3	S	262	0.189129	0.83527	0.0236551	0.96131	0.957831	1	0.980729	0.999941	0.987772
Q9ESU6	Q9ESU6	Bromodomain-containing protein 4	Brd4	S	1153	0.612915	0.935189	0.0480327	0.944278	0	1	0.990682	0.74818	0.863107
O88665	O88665	Bromodomain-containing protein 7	Brd7	S	279	0.827588	0.948003	0.00459846	0.927898	0.990567	0.975203	1	0.947617	0.988735
Q8R3B7	Q8R3B7	Bromodomain-containing protein 8	Brd8	S	284	0.173479	0.821864	0.121281	0	0.829849	0.654908	1	0.962132	0.927194
Q8R3B7	Q8R3B7	Bromodomain-containing protein 8	Brd8	S	460	0.182284	0.828428	-0.132312	1	0.820871	0.786765	0	0.827777	0
Q8R3B7	Q8R3B7	Bromodomain-containing protein 8	Brd8	T	264	0.377959	0.90666	-0.0175136	1	0.991401	0.837614	0.866682	0.929926	0.988363
Q3UQU0	Q3UQU0	Bromodomain-containing protein 9	Brd9	S	103	0.0143788	0.0520412	0.102472	0	0	0	0	0.928221	1
Q3UQU0	Q3UQU0	Bromodomain-containing protein 9	Brd9	S	587	0.422993	0.914374	0.126875	0.984828	0	1	0	0.949972	0.966964
Q8CFK2	Q8CFK2	Transcription factor IIIB 90 kDa subunit	Brf1	S	552	0.830699	0.948141	-0.032618	0.917893	0.433174	0.556093	1	0.863208	0.357383
B2RRD7	B2RRD7	NA	Brpf1	S	1074	0.38025	0.907103	-0.0167611	1	0.947689	0.90401	0.950946	0.937724	0.925136
B2RRD7	B2RRD7	NA	Brpf1	S	1079	0.793767	0.945055	0.00774488	1	0.664742	0	0	0	0.708062
Q921C3	Q921C3	Bromodomain and WD repeat-containing protein 1	Brwd1	S	1830	0.973587	0.953947	-0.000547031	0.964161	0.983424	1	0.998376	0.958959	0.986705
Q921C3	Q921C3	Bromodomain and WD repeat-containing protein 1	Brwd1	T	1926	0.783819	0.945871	0.00919664	0.868514	0.830152	0.831201	1	0.840694	0.899104
Q64152	Q64152	Transcription factor BTF3	Btf3	S	171	0.145469	0.791847	0.0569582	0.844437	0.792515	0.874112	0.733577	0.890627	1
Q64152	Q64152	Transcription factor BTF3	Btf3	S	156	0.272597	0.878157	-0.116338	1	0.779235	0.518219	0	0.894734	0
Q9Z1S0	Q9Z1S0	Mitotic checkpoint serine/threonine-protein kinase BUB1 beta	Bub1b	S	659	0.700603	0.941023	0.0215129	0	0.717868	0.973144	0.956992	1	0
Q8R149	Q8R149	BUD13 homolog	Bud13	S	238	0.839048	0.94853	0.00359587	0.979306	0.953373	1	0.997706	0.952276	0.99419
Q8R149	Q8R149	BUD13 homolog	Bud13	S	200	0.280501	0.881599	0.0436293	0.838422	0.826459	0.8121	0.989666	1	0.869746
Q8R149	Q8R149	BUD13 homolog	Bud13	T	183	0.138033	0.78128	0.134089	0	0.864005	0.88424	0	0.999732	1
Q8R149	Q8R149	BUD13 homolog	Bud13	T	131	0.510292	0.925696	0.0184879	0.802157	1	0.904667	0.957363	0.954029	0.969496
Q8R149	Q8R149	BUD13 homolog	Bud13	T	222	0.119877	0.753954	0.0731243	0	0.733902	0.825586	0	1	0.800448
Q8R149	Q8R149	BUD13 homolog	Bud13	S	200	0.0795061	0.639402	0.0492112	0.865728	0.932752	0.945268	0.997072	1	0.981123
Q8R149	Q8R149	BUD13 homolog	Bud13	S	148	0.347494	0.900365	0.0156515	0.957891	0.975391	0.990179	0.993909	0.986381	1
Q8R149	Q8R149	BUD13 homolog	Bud13	S	187	0.141152	0.785223	0.132526	0	0.864005	0.88424	0	0.999732	1
Q8R149	Q8R149	BUD13 homolog	Bud13	S	135	0.0236878	0.163762	0.0545404	0.827395	0.78734	0.933131	0.987485	0.984046	1
Q8R149	Q8R149	BUD13 homolog	Bud13	S	226	0.116344	0.746044	0.0754388	0	0.733902	0.825586	0	1	0.800448
Q8R149	Q8R149	BUD13 homolog	Bud13	T	196	0.0795061	0.639402	0.0492112	0.865728	0.932752	0.945268	0.997072	1	0.981123
Q8R149	Q8R149	BUD13 homolog	Bud13	T	144	0.347494	0.900365	0.0156515	0.957891	0.975391	0.990179	0.993909	0.986381	1
O54825	O54825	Bystin	Bysl	S	97	0.838559	0.948509	-0.00315162	0.988639	1	0.987168	0.992714	0.99335	0.98665
Q7TPS5	Q7TPS5	C2 domain-containing protein 5	C2cd5	S	817	0.41013	0.912356	-0.0172727	0.946007	0.952813	0.964893	1	0.884522	0.946654
Q7TPS5	Q7TPS5	C2 domain-containing protein 5	C2cd5	S	259	0.154624	0.802766	-0.134144	0.86241	0.858478	0.982858	1	0	0.819253
Q7TPS5	Q7TPS5	C2 domain-containing protein 5	C2cd5	S	260	0.726201	0.943276	-0.0493656	0	1	0	0	0.912815	0
Q7TPS5	Q7TPS5	C2 domain-containing protein 5	C2cd5	T	818	0.41013	0.912356	-0.0172727	0.946007	0.952813	0.964893	1	0.884522	0.946654
P97445	P97445	Voltage-dependent P/Q-type calcium channel subunit alpha-1A	Cacna1a	S	2303	0.678745	0.93982	0.00771225	0.953422	0.996683	0.99242	0.991483	1	0.976017
P97445	P97445	Voltage-dependent P/Q-type calcium channel subunit alpha-1A	Cacna1a	S	2318	0.191247	0.836452	-0.101821	1	0	0.853476	0	0	0
P97445	P97445	Voltage-dependent P/Q-type calcium channel subunit alpha-1A	Cacna1a	S	2220	0.515546	0.925459	0.0603143	0.766078	0.43685	0	0.553185	1	0
P97445	P97445	Voltage-dependent P/Q-type calcium channel subunit alpha-1A	Cacna1a	S	2091	0.315181	0.892224	0.0384891	0.865749	0.945705	0.820292	0.985166	1	0.971463
O88427	O88427	Voltage-dependent T-type calcium channel subunit alpha-1H	Cacna1h	T	1801	0.143934	0.789853	0.143409	0.912789	0	0	0	0.944634	1
O88427	O88427	Voltage-dependent T-type calcium channel subunit alpha-1H	Cacna1h	T	1803	0.144365	0.789239	0.144977	0.912789	0	0	0	0.944634	1
O88427	O88427	Voltage-dependent T-type calcium channel subunit alpha-1H	Cacna1h	T	1811	0.144612	0.789564	0.145308	0.912789	0	0	0	0.944634	1
Q9CS00	Q9CS00	Cactin	Cactin	S	148	0.348108	0.900378	-0.0538997	1	0.919452	0.930266	0.676628	0.835813	0.87985
B2RQC6	B2RQC6	CAD protein;Glutamine-dependent carbamoyl-phosphate synthase;Aspartate carbamoyltransferase;Dihydroorotase	Cad	S	1859	0.902404	0.95124	0.00326438	0.869083	0.955439	0.981564	1	0.897811	0.937186
B2RQC6	B2RQC6	CAD protein;Glutamine-dependent carbamoyl-phosphate synthase;Aspartate carbamoyltransferase;Dihydroorotase	Cad	S	1823	0.595517	0.933238	0.0498135	0	0	0	1	0	0.807747
B2RQC6	B2RQC6	CAD protein;Glutamine-dependent carbamoyl-phosphate synthase;Aspartate carbamoyltransferase;Dihydroorotase	Cad	S	1406	0.154334	0.803371	0.150348	0	0.855564	0.86169	0.876428	0.83536	1
B2RQC6	B2RQC6	CAD protein;Glutamine-dependent carbamoyl-phosphate synthase;Aspartate carbamoyltransferase;Dihydroorotase	Cad	S	1038	0.000519436	1.12065e-10	-0.253364	0.91838	0.95716	0.90862	1	0	0
B2RQC6	B2RQC6	CAD protein;Glutamine-dependent carbamoyl-phosphate synthase;Aspartate carbamoyltransferase;Dihydroorotase	Cad	T	1824	0.352781	0.901499	-0.112757	0	0.847311	1	0	0	0
B2RQC6	B2RQC6	CAD protein;Glutamine-dependent carbamoyl-phosphate synthase;Aspartate carbamoyltransferase;Dihydroorotase	Cad	T	1037	0.000616152	5.78544e-10	-0.254879	0.91838	0.95716	0.90862	1	0	0
P0DP28;P0DP27;P0DP26	P0DP28	NA	Calm1	S	102;102;102	0.847089	0.94814	-0.00152212	0.971389	0	0.816734	0	0	1
O35887	O35887	Calumenin	Calu	S	69	0.438729	0.916712	0.0332865	0.821929	0.849483	0.813142	0.839696	0.799923	1
Q6PHZ2	Q6PHZ2	Calcium/calmodulin-dependent protein kinase type II subunit delta	Camk2d	S	330	0.0333298	0.289157	-0.223314	0.969481	0.986754	0.706388	1	0.692543	0.540529
Q6PHZ2	Q6PHZ2	Calcium/calmodulin-dependent protein kinase type II subunit delta	Camk2d	S	319	0.789064	0.946138	-0.00416159	0.947128	0.963385	1	0.999759	0.942623	0.953253
Q6PHZ2	Q6PHZ2	Calcium/calmodulin-dependent protein kinase type II subunit delta	Camk2d	T	337	0.332091	0.896592	0.12929	0.949171	0.532409	0.514191	0.963726	0.94858	1
Q6PHZ2	Q6PHZ2	Calcium/calmodulin-dependent protein kinase type II subunit delta	Camk2d	S	315	0.259343	0.873826	0.0557548	0.937154	0.770549	0.834359	0.93762	1	0.911798
Q6PHZ2	Q6PHZ2	Calcium/calmodulin-dependent protein kinase type II subunit delta	Camk2d	S	319	0.259343	0.873826	0.0557548	0.937154	0.770549	0.834359	0.93762	1	0.911798
Q923T9	Q923T9	Calcium/calmodulin-dependent protein kinase type II subunit gamma	Camk2g	S	311	0.0382906	0.357303	-0.0716454	0.778508	0.869987	0.987229	1	0	0
Q923T9	Q923T9	Calcium/calmodulin-dependent protein kinase type II subunit gamma	Camk2g	S	384	0.476932	0.920823	0.107197	0	0	0	0.955634	1	0
Q923T9	Q923T9	Calcium/calmodulin-dependent protein kinase type II subunit gamma	Camk2g	T	382	0.463885	0.919403	-0.0847046	1	0.980189	0.938559	0	0.66305	0.99905
Q923T9	Q923T9	Calcium/calmodulin-dependent protein kinase type II subunit gamma	Camk2g	T	287	0.936034	0.952561	-0.00124428	0.9899	0.990852	0.986768	1	0.982776	0.994099
Q8C078	Q8C078	Calcium/calmodulin-dependent protein kinase kinase 2	Camkk2	S	572	0.144326	0.777462	-0.0998504	0	1	0.836776	0.845731	0	0
Q8C078	Q8C078	Calcium/calmodulin-dependent protein kinase kinase 2	Camkk2	S	495	0.293031	0.885705	0.045695	0.798306	0.710083	0.779176	1	0.847821	0.87332
P49070	P49070	Calcium signal-modulating cyclophilin ligand	Camlg	S	88	0.796025	0.946861	-0.00938649	1	0.886362	0	0	0.868918	0.982021
A2AHC3	A2AHC3	Calmodulin-regulated spectrin-associated protein 1	Camsap1	S	1069	0.231931	0.861618	0.0379843	0.896077	0.788766	1	0.962123	0.895472	0.92007
A2AHC3	A2AHC3	Calmodulin-regulated spectrin-associated protein 1	Camsap1	S	481	0.883332	0.950456	-0.0050158	0.958487	0.92091	1	0.887736	0.867284	0.991625
A2AHC3	A2AHC3	Calmodulin-regulated spectrin-associated protein 1	Camsap1	S	1135	0.235235	0.863191	0.070627	0.944892	0.683094	0.99849	1	0.918096	0.975467
A2AHC3	A2AHC3	Calmodulin-regulated spectrin-associated protein 1	Camsap1	S	560	0.229906	0.86059	0.0356865	0.949338	0.862499	0.908438	0.846169	0.94909	1
A2AHC3	A2AHC3	Calmodulin-regulated spectrin-associated protein 1	Camsap1	T	559	0.229906	0.86059	0.0356865	0.949338	0.862499	0.908438	0.846169	0.94909	1
Q8C1B1	Q8C1B1	Calmodulin-regulated spectrin-associated protein 2	Camsap2	S	1285	0.968108	0.953748	0.00197505	0.956296	0.837502	0.783222	0.845475	0.801145	1
Q8C1B1	Q8C1B1	Calmodulin-regulated spectrin-associated protein 2	Camsap2	S	1291	0.442905	0.918252	-0.0439058	1	0	0.910804	0	0	0.800122
Q8C1B1	Q8C1B1	Calmodulin-regulated spectrin-associated protein 2	Camsap2	S	439	0.206627	0.848665	0.130361	0.901058	0	0	0	1	0.849939
P35564	P35564	Calnexin	Canx	S	582	0.543221	0.9291	-0.00983303	0.987463	1	0.998808	0.993837	0.980002	0.986359
P35564	P35564	Calnexin	Canx	S	553	0.932969	0.951979	0.0105562	0	0.953616	0.968687	0.913803	0	1
P35564	P35564	Calnexin	Canx	S	553	0.426828	0.914963	0.0242676	0.85054	0.910542	0.898932	0.889735	0.86511	1
P35564	P35564	Calnexin	Canx	S	563	0.426828	0.914963	0.0242676	0.85054	0.910542	0.898932	0.889735	0.86511	1
P40124	P40124	Adenylyl cyclase-associated protein 1	Cap1	S	307	0.489126	0.923396	-0.0413014	1	0.795497	0.856177	0.713488	0.959841	0
P24452	P24452	Macrophage-capping protein	Capg	S	341	0.924168	0.952102	0.00232012	0.956774	0.938834	0.911684	0.956288	0.904985	1
P24452	P24452	Macrophage-capping protein	Capg	T	330	0.199603	0.843427	-0.115416	0.975031	1	0	0	0.968281	0
P47753	P47753	F-actin-capping protein subunit alpha-1	Capza1	S	9	0.399311	0.910579	0.0135527	0.973885	0.979592	0.999233	0.984673	0.998535	1
P47754	P47754	F-actin-capping protein subunit alpha-2	Capza2	S	9	0.744862	0.943799	-0.00553004	1	0.989686	0.964646	0.983619	0.997547	0.976645
P47757	P47757	F-actin-capping protein subunit beta	Capzb	S	263	0.912935	0.951548	0.0092773	0.630545	0.961959	1	0	0.829887	0.805539
Q9CR86	Q9CR86	Calcium-regulated heat stable protein 1	Carhsp1	S	31	0.845343	0.948809	0.008941	0.976126	0.958044	0.738821	0.903768	0.959957	1
Q9CR86	Q9CR86	Calcium-regulated heat stable protein 1	Carhsp1	S	42	0.616811	0.935434	-0.0219474	1	0.87056	0.83189	0.824494	0.95846	0.843505
Q9CR86	Q9CR86	Calcium-regulated heat stable protein 1	Carhsp1	S	53	0.405072	0.911364	-0.195137	0.948005	0.960611	0	1	0	0.975104
Q9CR86	Q9CR86	Calcium-regulated heat stable protein 1	Carhsp1	S	31	0.137366	0.780794	0.066604	0.798557	0.880869	0.759862	0.857398	1	0.900595
Q9CR86	Q9CR86	Calcium-regulated heat stable protein 1	Carhsp1	S	33	0.137366	0.780794	0.066604	0.798557	0.880869	0.759862	0.857398	1	0.900595
Q9CR86	Q9CR86	Calcium-regulated heat stable protein 1	Carhsp1	S	31	0.0195552	0.109449	0.141352	0.818963	0.664452	0.839874	0.734777	0.990696	1
Q9CR86	Q9CR86	Calcium-regulated heat stable protein 1	Carhsp1	S	33	0.0195552	0.109449	0.141352	0.818963	0.664452	0.839874	0.734777	0.990696	1
Q9CR86	Q9CR86	Calcium-regulated heat stable protein 1	Carhsp1	S	42	0.0195552	0.109449	0.141352	0.818963	0.664452	0.839874	0.734777	0.990696	1
Q9ER72	Q9ER72	Cysteine--tRNA ligase, cytoplasmic	Cars	S	390	0.408575	0.912064	0.0270227	0.855651	1	0.979695	0.976841	0.990027	0.970346
Q9ER72	Q9ER72	Cysteine--tRNA ligase, cytoplasmic	Cars	S	102	0.555317	0.930248	-0.0114703	0.965495	1	0.93063	0.90162	0.924097	0.986495
Q8K3W3	Q8K3W3	Protein CASC3	Casc3	S	262	0.989182	0.954498	-0.000424294	0.976667	0.935782	0.923623	1	0.919219	0.991955
Q8K3W3	Q8K3W3	Protein CASC3	Casc3	S	263	0.600497	0.934151	-0.0105893	0.979051	1	0.933199	0.981679	0.974046	0.973781
Q8K3W3	Q8K3W3	Protein CASC3	Casc3	S	145	0.874346	0.95008	-0.00305483	0.97513	0.955078	1	0.988222	0.928239	0.989906
Q8VHK1	Q8VHK1	Caskin-2	Caskin2	S	797	0.173279	0.817582	-0.0501598	0.985907	1	0	0	0	0.948781
Q8VHK1	Q8VHK1	Caskin-2	Caskin2	S	799	0.796887	0.946799	-0.0244255	0	0.900514	1	0.843808	0.912237	0
Q8VHK1	Q8VHK1	Caskin-2	Caskin2	S	403	0.30092	0.888261	-0.0187751	1	0.990986	0.981632	0.949246	0.971196	0.954719
O08736	O08736	Caspase-12	Casp12	S	104	0.827695	0.94795	0.0208698	0.878782	0.891679	0	0.883899	0.845343	1
O08736	O08736	Caspase-12	Casp12	S	85	0.287106	0.884428	-0.155978	0.930165	0.982572	0.937462	0.80945	1	0
O08736	O08736	Caspase-12	Casp12	S	89	0.989373	0.954505	0.000619589	0.988174	0.838997	0.862706	1	0.863574	0.96593
P70677	P70677	Caspase-3;Caspase-3 subunit p17;Caspase-3 subunit p12	Casp3	S	26	0.366868	0.904485	-0.0166463	0.989459	1	0.716129	0.734545	0.984623	0.947704
O08738	O08738	Caspase-6;Caspase-6 subunit p18;Caspase-6 subunit p11	Casp6	S	62	0.567008	0.931297	-0.01785	0.830146	0.944031	0.885047	1	0.773915	0.899837
P97864	P97864	Caspase-7;Caspase-7 subunit p20;Caspase-7 subunit p11	Casp7	S	16	0.39051	0.908638	0.0680666	0	1	0	0	0.906054	0.95671
O89110	O89110	Caspase-8;Caspase-8 subunit p18;Caspase-8 subunit p10	Casp8	S	188	0.355538	0.902152	-0.0945823	0.816467	0.937226	1	0.955549	0	0.936065
P51125	P51125	Calpastatin	Cast	S	163	0.0225738	0.148965	-0.0824858	0.926227	1	0.812261	0.816277	0.845309	0.777119
P51125	P51125	Calpastatin	Cast	S	165	0.642735	0.936588	0.0331566	0.848173	0.868447	0.894533	0	0.85585	1
P51125	P51125	Calpastatin	Cast	S	303	0.087162	0.662523	0.184895	0.789326	0	1	0.998385	0.96447	0.846654
P51125	P51125	Calpastatin	Cast	S	324	0.143541	0.789292	0.0625546	0.886687	0.830582	0.889565	1	0.997997	0.918212
P51125	P51125	Calpastatin	Cast	S	444	0.949846	0.953081	-0.000949029	0.999178	0.996009	0.981157	0.982578	0.992273	1
P51125	P51125	Calpastatin	Cast	S	11	0.379922	0.9068	-0.100728	0.745876	1	0.879237	0.880443	0.937884	0
P51125	P51125	Calpastatin	Cast	S	79	0.783584	0.945783	-0.000581389	0	0.965794	0	0	0	1
P51125	P51125	Calpastatin	Cast	S	81	0.620997	0.935576	-0.0535002	1	0.99492	0.954033	0	0.909687	0.897956
P51125	P51125	Calpastatin	Cast	T	216	0.999239	0.954847	-1.79671e-05	0.988813	0.938802	0.861947	0.861774	1	0.927514
P51125	P51125	Calpastatin	Cast	T	521	0.809957	0.946384	-0.011533	0	0.70017	1	0.913749	0.75172	0
P51125	P51125	Calpastatin	Cast	T	479	0.0243286	0.172262	-0.0855	0.935504	1	0.937967	0.992727	0.849537	0.790814
P51125	P51125	Calpastatin	Cast	S	219	0.593829	0.933606	0.00923896	0.986272	0.970947	0.992392	0.972634	0.982584	1
P51125	P51125	Calpastatin	Cast	T	309	0.905234	0.951352	0.00595595	0.917856	0.916111	0.770579	0.925219	1	0.853396
P51125	P51125	Calpastatin	Cast	S	323	0.652751	0.938132	0.0381284	0	0.694121	0	0	1	0
P51125	P51125	Calpastatin	Cast	S	324	0.112829	0.738131	-0.0366611	0.880803	0.849731	1	0.968022	0.820802	0.7799
P51125	P51125	Calpastatin	Cast	T	309	0.0525168	0.484367	0.0460541	0.847434	0.812561	1	0.963939	0.906426	0.924744
P51125	P51125	Calpastatin	Cast	S	594	0.883313	0.949723	-0.0126799	1	0	0.814583	0.95216	0.608479	0.892396
P51125	P51125	Calpastatin	Cast	S	604	0.505499	0.923871	0.0848489	0.846037	0.75107	0	0.984648	1	0.892262
P51125	P51125	Calpastatin	Cast	S	502	0.873614	0.949762	-0.00772218	0.856334	1	0	0.775061	0.89485	0.927484
A2ARP9	A2ARP9	Cation channel sperm-associated protein 2	Catsper2	S	454	0.0864812	0.665413	-0.162707	0.95787	1	0.936341	0.812046	0.870024	0.555377
C6KI89	C6KI89	Cation channel sperm-associated protein subunit gamma 2	Catsperg2	T	189	0.421575	0.913269	-0.110649	0.875022	0.882649	0.952564	0.957341	1	0
P49817	P49817	Caveolin-1	Cav1	S	2	0.701691	0.941275	-0.00674593	0.980556	0.970391	0.964137	1	0.968968	0.961105
P49817	P49817	Caveolin-1	Cav1	S	9	0.553875	0.930106	-0.0133517	0.978189	0.991319	0.971988	1	0.997448	0.924237
P49817	P49817	Caveolin-1	Cav1	Y	14	0.633264	0.936675	0.00843773	0.962255	0.995471	0.95751	0.974297	0.985279	1
Q9WVC3	Q9WVC3	Caveolin-2	Cav2	S	23	0.137612	0.781566	0.032862	0.964311	0.916015	0.967965	0.988492	1	0.989163
Q9WVC3	Q9WVC3	Caveolin-2	Cav2	S	20	0.893579	0.950879	0.00705066	0.903933	0.96795	0.795674	0.980999	0.894585	1
Q9WVC3	Q9WVC3	Caveolin-2	Cav2	S	23	0.907955	0.951464	0.00263934	0.94482	1	0.983324	0.976626	0.957262	0.995077
Q9WVC3	Q9WVC3	Caveolin-2	Cav2	Y	19	0.725346	0.94269	-0.00683537	0.971813	1	0.983324	0.976626	0.957262	0.995077
O70374	O70374	Protein CBFA2T2	Cbfa2t2	S	24	0.17068	0.820099	-0.0569346	0.973003	1	0	0.780213	0	0.944512
Q08024	Q08024	Core-binding factor subunit beta	Cbfb	S	173	0.192101	0.837317	-0.0567622	0.853709	1	0.773517	0.726257	0.768426	0.871241
P48758	P48758	Carbonyl reductase [NADPH] 1	Cbr1	S	30	0.0844225	0.649969	-0.120873	1	0	0.610555	0	0.522103	0
Q8K354	Q8K354	Carbonyl reductase [NADPH] 3	Cbr3	S	30	0.915036	0.951238	-0.00389043	0.727508	0.795484	0.7535	0.946659	0	1
P83917	P83917	Chromobox protein homolog 1	Cbx1	S	89	0.966024	0.953673	-0.00213997	0.92993	0.834642	0.893893	0.894739	1	0.75604
P23198	P23198	Chromobox protein homolog 3	Cbx3	S	93	0.318166	0.892063	0.148288	0.850503	0	1	0.465535	0.941832	0.888784
P23198	P23198	Chromobox protein homolog 3	Cbx3	S	95	0.844275	0.948767	-0.00343045	0.975662	1	0.992477	0.971819	0.992586	0.972516
P23198	P23198	Chromobox protein homolog 3	Cbx3	S	97	0.473033	0.92074	-0.12177	0.893971	0.948085	0.932701	0	0	1
P23198	P23198	Chromobox protein homolog 3	Cbx3	S	176	0.334786	0.897289	-0.0320682	0.988086	0.998189	0.909011	1	0.97659	0.916102
P23198	P23198	Chromobox protein homolog 3	Cbx3	T	173	0.385658	0.907372	0.175998	0	0	1	0	0	0.991291
P23198	P23198	Chromobox protein homolog 3	Cbx3	S	93	0.00606176	0.00398637	0.111826	0.727022	0.7713	0.917262	0.836614	1	0.959127
P23198	P23198	Chromobox protein homolog 3	Cbx3	S	95	0.722665	0.940885	0.0289238	0	0.729684	0	0.915812	1	0
P23198	P23198	Chromobox protein homolog 3	Cbx3	S	97	0.723339	0.941469	0.0291983	0	0.729684	0	0.915812	1	0
Q9QXV1	Q9QXV1	Chromobox protein homolog 8	Cbx8	S	284	0.000525045	9.0847e-11	0.241121	0	0	1	0.909911	0.919105	0.886258
Q9QXV1	Q9QXV1	Chromobox protein homolog 8	Cbx8	S	164	0.549799	0.929729	0.0102549	0.963214	0.9918	1	0.973981	0.993817	1
Q9D1C2	Q9D1C2	Protein chibby homolog 1	Cby1	S	20	0.200707	0.843472	-0.0405423	0.965935	1	0.99668	0.878777	0.907926	0.907435
Q8K1A6	Q8K1A6	Coiled-coil and C2 domain-containing protein 1A	Cc2d1a	S	435	0.915931	0.951781	0.00221153	0.944733	0.986864	0.925475	0.942231	0.939891	1
Q8VDP4	Q8VDP4	Cell cycle and apoptosis regulator protein 2	Ccar2	S	610	0.267315	0.876919	-0.0817893	1	0.887393	0.981006	0.95667	0.719799	0.942004
Q8VDP4	Q8VDP4	Cell cycle and apoptosis regulator protein 2	Ccar2	S	612	0.168192	0.818018	0.278118	0	0.736741	0	0.902758	1	0.884754
Q8VDP4	Q8VDP4	Cell cycle and apoptosis regulator protein 2	Ccar2	S	625	0.850575	0.949214	0.0378972	0.949463	0.2789	0	0	1	0
Q8VDP4	Q8VDP4	Cell cycle and apoptosis regulator protein 2	Ccar2	S	626	0.927738	0.95224	0.00302061	0.89036	1	0.988273	0.923436	0.938106	0.96186
Q3TMW1	Q3TMW1	Coiled-coil domain-containing protein 102A	Ccdc102a	S	536	0.237099	0.8653	0.0626627	0.845235	0	0.808094	0	1	0.815179
Q3TMW1	Q3TMW1	Coiled-coil domain-containing protein 102A	Ccdc102a	S	26	0.125291	0.764151	0.0946522	0.788425	0	0.859657	1	0.829865	0.903193
Q3TMW1	Q3TMW1	Coiled-coil domain-containing protein 102A	Ccdc102a	S	28	0.220844	0.856899	-0.081404	0.92238	0.920755	0.875464	1	0.907632	0
Q8R344	Q8R344	Coiled-coil domain-containing protein 12	Ccdc12	S	165	0.822858	0.947782	0.0038675	0.984644	0.973672	0.977079	0.991077	0.969875	1
Q8CI71	Q8CI71	Coiled-coil domain-containing protein 132	Ccdc132	S	492	0.708181	0.941142	-0.0423384	0	1	0.893445	0	0.915859	0
Q3TVA9	Q3TVA9	Coiled-coil domain-containing protein 136	Ccdc136	S	50	0.436943	0.916454	-0.0332305	1	0.895622	0.898684	0.829277	0.975575	0.764247
Q6PDM4	Q6PDM4	Coiled-coil domain-containing protein 36	Ccdc36	T	180	0.969261	0.95379	0.00201379	0.780061	1	0.895658	0.833348	0.898394	0.888386
Q9CR29	Q9CR29	Coiled-coil domain-containing protein 43	Ccdc43	T	137	0.749472	0.944054	0.00601947	0.994241	0.959693	0.938104	0.963156	1	0.973509
D3YZP9	D3YZP9	Coiled-coil domain-containing protein 6	Ccdc6	S	237	0.489459	0.923381	0.0113301	0.951782	0.954381	0.989037	1	0.960664	0.980144
D3YZP9	D3YZP9	Coiled-coil domain-containing protein 6	Ccdc6	S	233	0.836196	0.948395	0.0085592	0.972108	0.999368	0.877725	0.710057	1	0.999061
D3YZP9	D3YZP9	Coiled-coil domain-containing protein 6	Ccdc6	S	237	0.836196	0.948395	0.0085592	0.972108	0.999368	0.877725	0.710057	1	0.999061
Q8CDV6	Q8CDV6	Coiled-coil domain-containing protein 63	Ccdc63	S	459	0.0884157	0.671762	0.195225	0.870296	0	0.904587	0.981145	1	0.982854
Q5SP85	Q5SP85	Coiled-coil domain-containing protein 85A	Ccdc85a	S	342	0.11744	0.749524	-0.140941	0.8471	1	0.818596	0	0.777879	0
E9Q6B2	E9Q6B2	Coiled-coil domain-containing protein 85C	Ccdc85c	S	247	0.651251	0.937919	-0.0356582	0	1	0.77758	0.915718	0.930635	0
Q9JJ89	Q9JJ89	Coiled-coil domain-containing protein 86	Ccdc86	S	18	0.140617	0.785967	-0.026077	0.988301	1	0.967749	0.97374	0.953124	0.947396
Q9JJ89	Q9JJ89	Coiled-coil domain-containing protein 86	Ccdc86	S	283	0.922277	0.951595	0.00016927	0.893973	0	0	0.942452	1	0
Q5SNZ0	Q5SNZ0	Girdin	Ccdc88a	S	1677	0.465451	0.920397	-0.0161129	1	0.941123	0.941616	0.954487	0.966052	0.912814
Q5SNZ0	Q5SNZ0	Girdin	Ccdc88a	S	1680	0.178531	0.825928	-0.139229	1	0.834217	0	0.967744	0.758214	0
Q5SNZ0	Q5SNZ0	Girdin	Ccdc88a	S	1417	0.545307	0.928012	-0.0319052	0.86935	0.939224	0	0	1	0
Q9D6J3	Q9D6J3	Coiled-coil domain-containing protein 94	Ccdc94	S	211	0.0295383	0.241491	0.0785115	0.767369	0.868792	0.856517	0.883	0.951611	1
Q9D6J3	Q9D6J3	Coiled-coil domain-containing protein 94	Ccdc94	S	213	0.0295383	0.241491	0.0785115	0.767369	0.868792	0.856517	0.883	0.951611	1
A3KGF9	A3KGF9	Uncharacterized protein C15orf52 homolog	Ccdc9b	T	146	0.85506	0.949147	0.0232131	0.872779	1	0.873828	0	0.943524	0.998087
A3KGF9	A3KGF9	Uncharacterized protein C15orf52 homolog	Ccdc9b	T	496	0.563161	0.930333	-0.132329	0	1	0.95867	0.936715	0	0.983464
A3KGF9	A3KGF9	Uncharacterized protein C15orf52 homolog	Ccdc9b	S	138	0.071582	0.598507	0.115576	0	0.705838	1	0.997445	0.774398	0.818381
Q8K2Y9	Q8K2Y9	Cerebral cavernous malformations protein 2 homolog	Ccm2	S	402	0.336479	0.896983	0.0691661	0.601288	0	1	0	0	0.999651
Q8K2Y9	Q8K2Y9	Cerebral cavernous malformations protein 2 homolog	Ccm2	S	393	0.715916	0.942138	-0.00559159	0.97605	0.986815	0.994287	1	0.969423	0.97483
Q8K2Y9	Q8K2Y9	Cerebral cavernous malformations protein 2 homolog	Ccm2	T	403	0.964636	0.953623	-0.000917819	0.944287	0.940758	1	0.937853	0.90144	0.978952
Q61457	Q61457	G1/S-specific cyclin-E1	Ccne1	S	385	0.0702844	0.596831	-0.0664247	1	0.869816	0.840296	0.848047	0.797215	0.817804
Q61458	Q61458	Cyclin-H	Ccnh	T	315	0.65464	0.938196	0.010581	0.917184	0.960396	0.907927	0.870093	0.92	1
O88874	O88874	Cyclin-K	Ccnk	S	341	0.580868	0.932523	-0.0109092	0.960896	1	0.98917	0.970574	0.939741	0.982016
O88874	O88874	Cyclin-K	Ccnk	S	325	0.0728656	0.609828	0.0553325	0.911762	0.865957	0.890941	0.981193	1	0.987434
O88874	O88874	Cyclin-K	Ccnk	S	329	0.0728656	0.609828	0.0553325	0.911762	0.865957	0.890941	0.981193	1	0.987434
Q52KE7	Q52KE7	Cyclin-L1	Ccnl1	S	358	0.701692	0.941279	0.00601595	0.981642	0.985093	0.99186	0.98581	0.984283	1
Q52KE7	Q52KE7	Cyclin-L1	Ccnl1	S	347	0.499223	0.924362	0.0884451	0	0.766195	0	0	1	0.511093
Q52KE7	Q52KE7	Cyclin-L1	Ccnl1	S	341	0.957958	0.953379	-0.0016424	0.858403	0.865299	0.88961	1	0.873887	0.844798
Q52KE7	Q52KE7	Cyclin-L1	Ccnl1	S	347	0.25087	0.870362	0.0741618	0.96529	0.725815	0.992436	1	0.933022	0.991465
Q7TQK0	Q7TQK0	NA	Ccnt2	S	477	0.889022	0.950691	-0.00767386	0.838918	0.948112	0.805294	1	0.799466	0.958507
Q7TQK0	Q7TQK0	NA	Ccnt2	T	476	0.300202	0.887811	-0.119954	0.92887	0	1	0	0	0
Q8BGU5	Q8BGU5	Cyclin-Y	Ccny	S	71	0.856919	0.948745	-0.019276	0.966691	0	0	1	0	0.899419
Q8BGU5	Q8BGU5	Cyclin-Y	Ccny	S	73	0.0515742	0.47632	0.0616734	0.826062	0.877424	0.864756	0.774469	1	0.962779
Q8BGU5	Q8BGU5	Cyclin-Y	Ccny	S	25	0.784998	0.945711	-0.0299849	0.989436	1	0	0.953615	0.95144	0.933149
Q8BGU5	Q8BGU5	Cyclin-Y	Ccny	S	324	0.522482	0.926977	0.0423463	0.690833	1	0.870311	0.937043	0.903705	0.944359
Q8BGU5	Q8BGU5	Cyclin-Y	Ccny	S	326	0.467304	0.92067	0.0115786	0.969967	0.981016	0.927607	0.914965	1	0.993158
Q9WU84	Q9WU84	Copper chaperone for superoxide dismutase	Ccs	S	267	0.00238318	4.78931e-05	0.150627	0.632866	0	0	0	0.935157	1
Q8C0C4	Q8C0C4	Serine-rich coiled-coil domain-containing protein 1	Ccser1	S	375	0.246062	0.863977	-0.113337	1	0	0	0.931814	0	0
P80314	P80314	T-complex protein 1 subunit beta	Cct2	S	3	0.484314	0.922769	-0.0116321	1	0.990375	0.980606	0.953051	0.979171	0.965553
P80314	P80314	T-complex protein 1 subunit beta	Cct2	S	168	0.729472	0.942641	-0.0272155	0	0.92064	0.759985	0.826623	1	0.474295
P80314	P80314	T-complex protein 1 subunit beta	Cct2	S	169	0.855008	0.948854	0.00467709	0.855541	0	0	0	1	0
P80314	P80314	T-complex protein 1 subunit beta	Cct2	S	389	0.174364	0.822856	-0.079307	1	0.892665	0.691861	0.848871	0.885252	0.672149
P80314	P80314	T-complex protein 1 subunit beta	Cct2	S	27	0.352109	0.905965	0.024414	0	0	0	0	1	0.907686
P80318	P80318	T-complex protein 1 subunit gamma	Cct3	S	252	0.120933	0.753951	-0.0795286	0.826073	1	0.91261	0.783071	0.743929	0.771535
Q9JLQ0	Q9JLQ0	CD2-associated protein	Cd2ap	S	510	0.727682	0.943187	-0.00605761	0.830068	0.938654	0.924408	0.901494	1	0
Q9JLQ0	Q9JLQ0	CD2-associated protein	Cd2ap	S	458	0.638033	0.937034	0.00734081	0.92385	0.917406	0.987155	1	0.933158	0.929946
Q9CWK3	Q9CWK3	CD2 antigen cytoplasmic tail-binding protein 2	Cd2bp2	S	196	0.657793	0.938412	0.0388933	0.714945	0.650732	1	0.613285	0.583262	0.964188
Q76KJ5	Q76KJ5	DNA-directed RNA polymerase I subunit RPA34	Cd3eap	S	170	0.0334494	0.299682	-0.254378	1	0.973607	0.976241	0	0	0
P15379	P15379	CD44 antigen	Cd44	S	733	0.0450439	0.418782	0.060212	0.928388	0.851388	0.946348	0.951435	0.983532	1
P15379	P15379	CD44 antigen	Cd44	T	726	0.524624	0.927247	-0.0102928	0.981291	1	0.90248	0.892664	0.97733	0.970264
Q8R349	Q8R349	Cell division cycle protein 16 homolog	Cdc16	S	560	0.110117	0.732186	-0.0433834	0.97521	1	0.961554	0.946637	0.83454	0.939822
Q8BGZ4	Q8BGZ4	Cell division cycle protein 23 homolog	Cdc23	S	588	0.186004	0.832858	-0.0224892	0.992378	1	0.995632	0.994364	0.958247	0.963799
Q8BGZ4	Q8BGZ4	Cell division cycle protein 23 homolog	Cdc23	T	562	0.534479	0.928532	0.0717488	0	0	0	1	0	0.793148
Q99JP4	Q99JP4	Anaphase-promoting complex subunit CDC26	Cdc26	S	42	0.962584	0.953548	-0.00213885	0.89486	0.973389	0.79891	1	0.872888	0.986515
Q99JP4	Q99JP4	Anaphase-promoting complex subunit CDC26	Cdc26	T	41	0.445831	0.917718	-0.0230154	0.876787	1	0	0.77203	0.846127	0.907622
A2A6Q5	A2A6Q5	Cell division cycle protein 27 homolog	Cdc27	S	365	0.169609	0.820991	-0.0541869	0.85208	0.791712	0.914874	1	0	0.780673
Q61081	Q61081	Hsp90 co-chaperone Cdc37;Hsp90 co-chaperone Cdc37, N-terminally processed	Cdc37	S	13	0.577466	0.932211	0.0295173	1	0.770602	0.964983	0.973113	0.92989	0.940307
Q9CZP7	Q9CZP7	Hsp90 co-chaperone Cdc37-like 1	Cdc37l1	S	86	0.14404	0.790534	-0.127417	0.825482	1	0.838566	0.732633	0.831339	0
Q7TT50	Q7TT50	Serine/threonine-protein kinase MRCK beta	Cdc42bpb	S	1692	0.15225	0.800211	0.0559663	0.825569	0.829748	0.910329	0.91893	1	0.852691
Q91W92	Q91W92	Cdc42 effector protein 1	Cdc42ep1	S	368	0.0878398	0.671022	-0.0370939	0.998509	1	0.934256	0.956472	0.961809	0.931988
Q91W92	Q91W92	Cdc42 effector protein 1	Cdc42ep1	S	371	0.00301478	0.000199903	0.179547	0	0	0	0	1	0.881067
Q91W92	Q91W92	Cdc42 effector protein 1	Cdc42ep1	S	121	0.184269	0.831505	0.0289849	0.905516	0.871861	0.949629	1	0.935496	0.947942
Q91W92	Q91W92	Cdc42 effector protein 1	Cdc42ep1	S	207	0.419918	0.913962	-0.0130783	0.984818	1	0.97262	0.971608	0.97594	0.974224
Q91W92	Q91W92	Cdc42 effector protein 1	Cdc42ep1	S	368	0.549374	0.929663	0.0221537	0.805351	0.939808	0.945154	1	0.90377	0.912902
Q91W92	Q91W92	Cdc42 effector protein 1	Cdc42ep1	S	371	0.549374	0.929663	0.0221537	0.805351	0.939808	0.945154	1	0.90377	0.912902
Q8JZX9	Q8JZX9	Cdc42 effector protein 2	Cdc42ep2	S	109	0.383694	0.90782	0.0339556	0.634418	0.570321	1	0.825452	0.799188	0
Q8JZX9	Q8JZX9	Cdc42 effector protein 2	Cdc42ep2	S	2	0.181619	0.827193	0.0665161	0.759202	0.887235	0.788775	0	1	0.946157
Q8JZX9	Q8JZX9	Cdc42 effector protein 2	Cdc42ep2	T	3	0.188429	0.834629	0.0665161	0.759202	0.887235	0.788775	0	1	0.946157
Q8JZX9	Q8JZX9	Cdc42 effector protein 2	Cdc42ep2	S	137	0.0460272	0.433013	0.171375	0	0	0	0.900599	0.883011	1
Q8JZX9	Q8JZX9	Cdc42 effector protein 2	Cdc42ep2	S	141	0.0483208	0.437253	0.171973	0	0	0	0.900599	0.883011	1
Q9CQC5	Q9CQC5	Cdc42 effector protein 3	Cdc42ep3	S	89	0.148279	0.795433	-0.0537243	0.993164	1	0.927947	0.841216	0.955522	0.851371
Q9CQC5	Q9CQC5	Cdc42 effector protein 3	Cdc42ep3	S	144	0.320455	0.893643	-0.0379478	0.986466	0.831046	0.996248	1	0.872994	0.796987
Q9CQC5	Q9CQC5	Cdc42 effector protein 3	Cdc42ep3	S	108	0.112968	0.738423	-0.0370734	0.967363	1	0.904465	0.971261	0.913477	0.888249
Q9JM96	Q9JM96	Cdc42 effector protein 4	Cdc42ep4	S	64	0.581295	0.93256	0.0112657	0.906456	0.932005	0.93679	1	0.932609	0.949161
Q9JM96	Q9JM96	Cdc42 effector protein 4	Cdc42ep4	T	161	0.66556	0.937914	0.00603428	0.674628	0	1	0	0	0.732571
Q9Z0X0	Q9Z0X0	Cdc42 effector protein 5	Cdc42ep5	S	22	0.270811	0.878179	-0.0403643	0.904487	1	0.863061	0.882834	0.779123	0.941372
Q8BHL7	Q8BHL7	CDC42 small effector protein 1	Cdc42se1	S	77	0.088459	0.680996	-0.117347	0	1	0.772207	0.790697	0.550248	0
Q6A068	Q6A068	Cell division cycle 5-like protein	Cdc5l	S	303	0.582823	0.932692	-0.0126109	0.964417	1	0.992909	0.959597	0.99105	0.931102
Q6A068	Q6A068	Cell division cycle 5-like protein	Cdc5l	T	227	0.345013	0.899714	-0.0266037	0.951819	0.983642	0.971933	1	0.970553	0.860668
Q6A068	Q6A068	Cell division cycle 5-like protein	Cdc5l	Y	232	0.801906	0.946734	-0.0296086	0.806297	0	0	1	0	0.710311
Q8BHX3	Q8BHX3	Borealin	Cdca8	S	233	0.693722	0.939929	-0.0334392	0	0.967725	1	0	0.931225	0
P55288	P55288	Cadherin-11	Cdh11	S	788	0.437656	0.916567	-0.025806	0.911066	0.987505	1	0.90903	0.885995	0.92841
P55288	P55288	Cadherin-11	Cdh11	S	714	0.613112	0.935163	-0.00775046	0.974483	0.976493	0.995657	1	0.968063	0.963444
P11440;Q80YP0;P97377	P11440	Cyclin-dependent kinase 1;Cyclin-dependent kinase 3;Cyclin-dependent kinase 2	Cdk1;Cdk3;Cdk2	T	14;14;14	0.919159	0.951905	-0.00639892	0.908268	0.850593	0.833025	0.799722	1	0.738245
P11440	P11440	Cyclin-dependent kinase 1	Cdk1	T	161	0.0165067	0.0739586	-0.0727359	0.951699	1	0.929925	0.969952	0.853055	0.825697
P11440;Q80YP0;P97377	P11440	Cyclin-dependent kinase 1;Cyclin-dependent kinase 3;Cyclin-dependent kinase 2	Cdk1;Cdk3;Cdk2	Y	15;15;15	0.793198	0.946345	-0.00438501	0.985746	0.998145	0.980631	1	0.979295	0.992928
P11440;Q80YP0;P97377	P11440	Cyclin-dependent kinase 1;Cyclin-dependent kinase 3;Cyclin-dependent kinase 2	Cdk1;Cdk3;Cdk2	T	14;14;14	0.219982	0.855228	-0.0540134	1	0.928375	0.839197	0.862522	0.949078	0.813685
P11440;Q80YP0;P97377	P11440	Cyclin-dependent kinase 1;Cyclin-dependent kinase 3;Cyclin-dependent kinase 2	Cdk1;Cdk3;Cdk2	Y	15;15;15	0.219982	0.855228	-0.0540134	1	0.928375	0.839197	0.862522	0.949078	0.813685
P24788	P24788	Cyclin-dependent kinase 11B	Cdk11b	S	578	0.633957	0.93584	-0.0540175	0	1	0.910573	0	0.874885	0
P24788	P24788	Cyclin-dependent kinase 11B	Cdk11b	S	65	0.0200766	0.116278	-0.097201	1	0.965879	0.832987	0.712548	0.809254	0.758381
P24788	P24788	Cyclin-dependent kinase 11B	Cdk11b	S	234	0.50856	0.924972	-0.0714747	0.778707	1	0.976453	0	0.963502	0
P24788	P24788	Cyclin-dependent kinase 11B	Cdk11b	T	584	0.0476613	0.445331	-0.0769082	0.996003	1	0.947004	0	0	0
P24788	P24788	Cyclin-dependent kinase 11B	Cdk11b	T	61	0.139648	0.790463	-0.113891	0	1	0.95368	0.98754	0	0
P24788	P24788	Cyclin-dependent kinase 11B	Cdk11b	S	578	0.937465	0.952613	0.0030585	0.91102	0.889144	0.805265	0.706477	1	0.813338
P24788	P24788	Cyclin-dependent kinase 11B	Cdk11b	T	584	0.937465	0.952613	0.0030585	0.91102	0.889144	0.805265	0.706477	1	0.813338
Q14AX6	Q14AX6	Cyclin-dependent kinase 12	Cdk12	S	677	0.436651	0.916431	0.0214433	0.999446	0.884827	0.981244	1	0.983058	0.984368
Q14AX6	Q14AX6	Cyclin-dependent kinase 12	Cdk12	S	1079	0.40666	0.911727	0.0473779	0.95937	0.838528	0.989203	0.746307	0.977365	1
Q14AX6	Q14AX6	Cyclin-dependent kinase 12	Cdk12	T	889	0.878581	0.950258	0.00381775	0.972315	0.929156	0.932034	0.970473	0.915726	1
Q14AX6	Q14AX6	Cyclin-dependent kinase 12	Cdk12	S	677	0.8403	0.948587	0.00401888	0.960254	0.956967	0.938126	1	0.968948	0.962209
Q14AX6	Q14AX6	Cyclin-dependent kinase 12	Cdk12	S	681	0.8403	0.948587	0.00401888	0.960254	0.956967	0.938126	1	0.968948	0.962209
Q14AX6	Q14AX6	Cyclin-dependent kinase 12	Cdk12	S	381	0.935242	0.951511	-0.00226608	0.76486	0.696886	0.943837	0.898292	0	1
Q14AX6	Q14AX6	Cyclin-dependent kinase 12	Cdk12	S	382	0.798742	0.946616	-0.0184572	0.921395	0.909299	0.695732	0.914706	1	0.769958
Q14AX6	Q14AX6	Cyclin-dependent kinase 12	Cdk12	S	384	0.349148	0.900663	0.0239822	0.947257	0.928679	0.899882	0.970201	1	0.954852
Q69ZA1	Q69ZA1	Cyclin-dependent kinase 13	Cdk13	S	664	0.300034	0.887857	-0.0512194	0.987133	0.984085	0.984168	0.980014	1	0.794978
Q69ZA1	Q69ZA1	Cyclin-dependent kinase 13	Cdk13	S	384	0.949925	0.953082	0.00141471	1	0.94689	0.889752	0.952628	0.98509	0.966967
Q69ZA1	Q69ZA1	Cyclin-dependent kinase 13	Cdk13	S	867	0.127066	0.763273	-0.141532	1	0.8995	0	0	0.866122	0
Q69ZA1	Q69ZA1	Cyclin-dependent kinase 13	Cdk13	T	1245	0.236938	0.864097	-0.0221908	0.966548	1	0.975589	0.989778	0.949486	0.94546
Q69ZA1	Q69ZA1	Cyclin-dependent kinase 13	Cdk13	T	871	0.257439	0.873054	0.0236597	0.975774	0.918646	0.948072	0.957054	0.981666	1
O35495	O35495	Cyclin-dependent kinase 14	Cdk14	S	95	0.89831	0.950321	0.0031389	0.870472	0	0	0.807466	1	0
Q04735	Q04735	Cyclin-dependent kinase 16	Cdk16	S	138	0.0676284	0.581053	-0.123058	1	0.856437	0.867162	0.866623	0.78756	0
Q04735;Q8K0D0	Q04735	Cyclin-dependent kinase 16;Cyclin-dependent kinase 17	Cdk16;Cdk17	S	119;146	0.846803	0.948878	-0.00471072	0.977171	0.96351	1	0.912991	0.984912	0.937873
Q04735	Q04735	Cyclin-dependent kinase 16	Cdk16	S	153	0.683094	0.940101	-0.0114738	0.973803	1	0.884364	0.997778	0.978967	0.952148
Q8K0D0	Q8K0D0	Cyclin-dependent kinase 17	Cdk17	S	137	0.188092	0.832825	-0.0703435	0.994819	1	0.737456	0	0.932484	0.764088
Q04899	Q04899	Cyclin-dependent kinase 18	Cdk18	S	109	0.813299	0.947328	0.00501802	0.949536	1	0.970855	0.919266	0.98801	0.979291
Q04899	Q04899	Cyclin-dependent kinase 18	Cdk18	S	66	0.00858547	0.0129514	-0.147732	0.862197	1	0	0	0	0
P30285	P30285	Cyclin-dependent kinase 4	Cdk4	S	300	0.332159	0.896645	0.032656	0.991528	0.874286	0.841017	0.942894	0.998631	1
Q99J95	Q99J95	Cyclin-dependent kinase 9	Cdk9	T	186	0.537954	0.928547	-0.0816159	0.827986	0.770211	0.814608	0.772575	1	0.247288
P46414	P46414	Cyclin-dependent kinase inhibitor 1B	Cdkn1b	S	10	0.69198	0.940561	0.033581	0.768184	0.846958	0	0.746814	1	0.736046
A2A6T1	A2A6T1	Cerebellar degeneration-related protein 2-like	Cdr2l	S	179	0.135516	0.778516	-0.0326535	0.992866	1	0.989665	0.977886	0.968559	0.921245
Q99L43	Q99L43	Phosphatidate cytidylyltransferase 2	Cds2	S	20	0.39012	0.907702	0.113855	0.993385	0	0.998574	0	1	0.966995
Q99L43	Q99L43	Phosphatidate cytidylyltransferase 2	Cds2	S	22	0.39259	0.908711	0.11283	0.993385	0	0.998574	0	1	0.966995
Q99L43	Q99L43	Phosphatidate cytidylyltransferase 2	Cds2	S	32	0.95941	0.953432	0.00352797	0.978617	0.953093	0.609055	0.931143	0.944189	1
Q4VAA2	Q4VAA2	Protein CDV3	Cdv3	S	51	0.857684	0.949146	-0.0106274	1	0.999822	0	0.934325	0.969183	0.981757
Q4VAA2	Q4VAA2	Protein CDV3	Cdv3	Y	213	0.384085	0.907817	0.0172314	0.975275	0.960988	0.950159	0.90188	1	0.992238
Q9WTK2	Q9WTK2	Chromodomain Y-like protein	Cdyl	S	196	0.428827	0.915257	0.0286941	0.862198	0.824082	0.926181	1	0.822802	0.984908
P28033	P28033	CCAAT/enhancer-binding protein beta	Cebpb	S	184	0.000136163	3.7516e-14	0.304561	0	0	0	0	1	0.96077
Q00322	Q00322	CCAAT/enhancer-binding protein delta	Cebpd	S	10	0.437749	0.916641	-0.0129318	0.98014	1	0.997711	0.982722	0.96489	0.972504
P53569	P53569	CCAAT/enhancer-binding protein zeta	Cebpz	S	670	0.156171	0.80445	0.116111	0.902997	0	1	0.944377	0.913922	0.98571
P53569	P53569	CCAAT/enhancer-binding protein zeta	Cebpz	S	2	0.032964	0.284286	-0.0817521	1	0.88882	0.986656	0.931646	0	0
P49452	P49452	Centromere protein C	Cenpc	S	158	0.67872	0.939817	-0.0156659	0.710969	0.880183	0.883855	1	0.764808	0.757832
Q3TJM4	Q3TJM4	Centromere protein T	Cenpt	S	279	0.129077	0.76919	-0.133952	0.839957	0.909154	1	0.857771	0	0.797309
Q8C4M7	Q8C4M7	Centromere protein U	Cenpu	S	164	0.0274377	0.214137	-0.0528762	0.963303	1	0.880867	0.862946	0.88421	0.88161
Q62036	Q62036	Centrosomal protein of 131 kDa	Cep131	S	78	0.027438	0.209396	-0.130698	1	0.917622	0.896501	0	0	0
Q6A065	Q6A065	Centrosomal protein of 170 kDa	Cep170	S	1564	0.117699	0.74788	-0.0639317	0.927422	0.95836	1	0.847236	0.799252	0.843804
Q6A065	Q6A065	Centrosomal protein of 170 kDa	Cep170	S	1102	0.793869	0.946379	-0.00468646	0.960692	1	0.972136	0.95577	0.966685	0.978522
Q6A065	Q6A065	Centrosomal protein of 170 kDa	Cep170	S	829	0.248419	0.869392	-0.0204588	0.995855	1	0.985209	0.987597	0.957188	0.980966
Q6A065	Q6A065	Centrosomal protein of 170 kDa	Cep170	S	443	0.237464	0.864276	-0.024001	1	0.983653	0.953908	0.989643	0.966578	0.945169
Q6A065	Q6A065	Centrosomal protein of 170 kDa	Cep170	S	1515	0.116566	0.74375	-0.148383	1	0.992062	0.926236	0	0.761246	0.632618
Q6A065	Q6A065	Centrosomal protein of 170 kDa	Cep170	S	1384	0.757246	0.944218	-0.0229815	0.999268	1	0	0.906892	0.972257	0.931962
Q6A065	Q6A065	Centrosomal protein of 170 kDa	Cep170	S	1048	0.817756	0.947537	0.00890489	0.921076	0.994369	0.844012	1	0.990565	0.957043
Q6A065	Q6A065	Centrosomal protein of 170 kDa	Cep170	S	1407	0.178682	0.826925	-0.0316292	0.86359	0.907872	1	0.938132	0.838495	0.780019
Q6A065	Q6A065	Centrosomal protein of 170 kDa	Cep170	T	1405	0.291567	0.885257	0.0383748	0.644442	0.840147	1	0.977253	0.794821	0.893529
Q6A065	Q6A065	Centrosomal protein of 170 kDa	Cep170	S	870	0.93966	0.952696	0.0025147	1	0.867468	0.842339	0.867251	0.906186	0.970533
Q6A065	Q6A065	Centrosomal protein of 170 kDa	Cep170	S	872	0.425106	0.914676	0.0528695	0.890157	0.707103	0.983819	0.996821	0.777475	1
Q6A065	Q6A065	Centrosomal protein of 170 kDa	Cep170	S	378	0.963569	0.953584	-0.00214328	0.818992	1	0.917376	0.855417	0.848383	0.962765
Q6A065	Q6A065	Centrosomal protein of 170 kDa	Cep170	S	1152	0.444053	0.917288	0.148339	0	0	0	0.911833	1	0
Q6A065	Q6A065	Centrosomal protein of 170 kDa	Cep170	S	1155	0.128831	0.767742	-0.0757647	0.972984	1	0.974783	0.979617	0.775408	0.951142
Q6A065	Q6A065	Centrosomal protein of 170 kDa	Cep170	S	1157	0.219451	0.85509	-0.133514	0.954889	1	0.994925	0.936807	0	0.973846
Q6A065	Q6A065	Centrosomal protein of 170 kDa	Cep170	S	1188	0.154211	0.803014	-0.0274473	0.986279	1	0.979493	0.991807	0.960879	0.929172
Q80U49	Q80U49	Centrosomal protein of 170 kDa protein B	Cep170b	S	1122	0.687501	0.940385	-0.00712861	0.952954	0.952529	0.971747	1	0.916536	0.959668
Q80U49	Q80U49	Centrosomal protein of 170 kDa protein B	Cep170b	S	1341	0.77112	0.943596	0.0154758	0	0	0	1	0.928648	0
Q80U49	Q80U49	Centrosomal protein of 170 kDa protein B	Cep170b	S	881	0.886683	0.950596	-0.00373016	0.92562	0.975339	1	0.912633	0.968529	0.918153
Q80U49	Q80U49	Centrosomal protein of 170 kDa protein B	Cep170b	S	882	0.48052	0.922276	-0.0177667	0.979346	0.975339	1	0.912633	0.968529	0.918153
Q80U49	Q80U49	Centrosomal protein of 170 kDa protein B	Cep170b	S	1283	0.903655	0.950887	0.00398913	1	0	0.951362	0	0.971907	0.711862
Q80U49	Q80U49	Centrosomal protein of 170 kDa protein B	Cep170b	T	1289	0.448014	0.918038	0.0522167	0.823292	0.714062	0	1	0.895026	0.890775
E9Q309	E9Q309	NA	Cep350	S	874	0.794029	0.945741	-0.0179717	0	0.800772	1	0.676171	0.831824	0
E9Q309	E9Q309	NA	Cep350	S	2221	0.787565	0.946007	-0.0255088	0.99403	1	0	0.982261	0.92672	0.968006
Q8BT07	Q8BT07	Centrosomal protein of 55 kDa	Cep55	S	40	0.543909	0.929132	0.0387575	0.744421	0.784281	0.794916	0.789383	1	0.679663
Q8BT07	Q8BT07	Centrosomal protein of 55 kDa	Cep55	S	428	0.1784	0.823141	-0.101663	0.804758	0	0.833857	1	0	0
A9Q751	A9Q751	Cilia- and flagella-associated protein 221	Cfap221	T	736	0.0815935	0.647318	-0.0677264	0.96615	1	0.877538	0.979292	0.895968	0.755318
Q5F201	Q5F201	Cilia- and flagella-associated protein 52	Cfap52	S	363	0.117925	0.748324	-0.0638643	1	0.84092	0.94352	0.951154	0.792629	0.808787
Q5F201	Q5F201	Cilia- and flagella-associated protein 52	Cfap52	T	503	0.289723	0.886439	-0.0309266	0	0	0.996723	1	0	0
O88271	O88271	Craniofacial development protein 1	Cfdp1	S	203	0.879885	0.95031	0.00695981	0.923426	0.710983	1	0.990165	0.898549	0.765189
O88271	O88271	Craniofacial development protein 1	Cfdp1	S	246	0.360404	0.903151	-0.0167367	0.965135	1	0.974577	0.985145	0.949961	0.961642
P18760	P18760	Cofilin-1	Cfl1	S	3	0.0848987	0.660098	-0.0508723	1	0.998628	0.891227	0.857885	0.949878	0.860138
P18760	P18760	Cofilin-1	Cfl1	S	41	0.440572	0.916497	0.0403612	0	1	0.935753	0.884178	0.947335	0.926486
P45591	P45591	Cofilin-2	Cfl2	S	3	0.765958	0.944945	-0.00448161	0.99836	1	0.988929	0.990392	0.99314	0.99443
Q6AW69	Q6AW69	Cingulin-like protein 1	Cgnl1	S	252	0.185253	0.831969	0.144959	0.947904	0	0.99128	1	0.962781	0.982061
Q6AW69	Q6AW69	Cingulin-like protein 1	Cgnl1	S	415	0.0645499	0.563997	-0.104323	1	0.889557	0.833055	0.892606	0	0.819921
Q6AW69	Q6AW69	Cingulin-like protein 1	Cgnl1	S	416	0.450893	0.91807	0.0603084	0	1	0	0.937114	0.958934	0.955947
Q6AW69	Q6AW69	Cingulin-like protein 1	Cgnl1	S	284	0.334693	0.897272	0.0303801	0.847376	0.964935	0.992906	1	0.938377	0.983351
Q6AW69	Q6AW69	Cingulin-like protein 1	Cgnl1	S	389	0.00655591	0.00584952	0.142594	0	0	0.888777	0.902255	0.856791	1
Q6AW69	Q6AW69	Cingulin-like protein 1	Cgnl1	S	392	0.00344775	0.000303204	-0.130668	1	0.945396	0.87966	0.842043	0	0
Q9QWF0	Q9QWF0	Chromatin assembly factor 1 subunit A	Chaf1a	S	173	0.777606	0.94485	-0.0418484	0	1	0.887517	0	0.929151	0
Q8K327	Q8K327	Chromosome alignment-maintaining phosphoprotein 1	Champ1	S	532	0.416506	0.913387	0.0168657	0.901803	0.947553	0.990941	1	0.943885	0.949664
Q8K327	Q8K327	Chromosome alignment-maintaining phosphoprotein 1	Champ1	S	405	0.921952	0.952018	0.0015948	0.937379	0.963978	0.992896	1	0.950657	0.955782
Q8K327	Q8K327	Chromosome alignment-maintaining phosphoprotein 1	Champ1	S	394	0.307746	0.89047	0.0610377	0	0	1	0.969403	0	0.910178
Q8K327	Q8K327	Chromosome alignment-maintaining phosphoprotein 1	Champ1	S	416	0.338239	0.898203	-0.0173012	0.988044	0.989246	0.98102	1	0.947021	0.976075
Q8K327	Q8K327	Chromosome alignment-maintaining phosphoprotein 1	Champ1	S	464	0.133497	0.775639	0.0292423	0.962426	0.925066	0.876724	0.888055	0.998835	1
Q8K327	Q8K327	Chromosome alignment-maintaining phosphoprotein 1	Champ1	T	593	0.597353	0.933071	-0.0314828	0	0.995347	0.941634	1	0	0.830043
Q8K327	Q8K327	Chromosome alignment-maintaining phosphoprotein 1	Champ1	S	237	0.420662	0.914814	0.0301976	0.823943	0.889336	0	0	1	0.837997
Q8K327	Q8K327	Chromosome alignment-maintaining phosphoprotein 1	Champ1	S	254	0.22553	0.858358	0.0742697	0.983229	0	0	0	0.981332	1
Q8K327	Q8K327	Chromosome alignment-maintaining phosphoprotein 1	Champ1	S	617	0.248032	0.869069	0.02472	0.943808	0.911269	0.909641	0.929606	0.94764	1
Q8K327	Q8K327	Chromosome alignment-maintaining phosphoprotein 1	Champ1	S	105	0.816178	0.947461	0.0130323	0.757379	0.95738	1	0.939772	0.970161	0.79301
Q8K327	Q8K327	Chromosome alignment-maintaining phosphoprotein 1	Champ1	S	204	0.770607	0.945188	0.00716891	0.910212	0.985526	0.966337	0.917575	0.927021	1
Q8K327	Q8K327	Chromosome alignment-maintaining phosphoprotein 1	Champ1	S	237	0.577999	0.932258	-0.028656	0.881563	0.86198	0.846645	1	0.725123	0.912878
Q8K327	Q8K327	Chromosome alignment-maintaining phosphoprotein 1	Champ1	S	243	0.837468	0.947295	0.0156297	0	0.903825	0.795032	0.985762	0	1
Q8K327	Q8K327	Chromosome alignment-maintaining phosphoprotein 1	Champ1	S	254	0.982033	0.954194	-0.00228849	1	0.765346	0.987638	0	0.886891	0.869481
Q8K327	Q8K327	Chromosome alignment-maintaining phosphoprotein 1	Champ1	S	603	0.284977	0.883123	0.081409	0.694678	0.911128	0.787683	0.991091	0.88147	1
Q8K327	Q8K327	Chromosome alignment-maintaining phosphoprotein 1	Champ1	S	272	0.204944	0.846199	-0.0503804	0.965429	1	0.826502	0.97233	0.865291	0.919257
Q91VN4	Q91VN4	MICOS complex subunit Mic25	Chchd6	S	164	0.790039	0.946183	-0.0129505	0.918804	0.766667	0.825093	0.642562	1	0.587773
Q91VN4	Q91VN4	MICOS complex subunit Mic25	Chchd6	T	166	0.790039	0.946183	-0.0129505	0.918804	0.766667	0.825093	0.642562	1	0.587773
P40201	P40201	Chromodomain-helicase-DNA-binding protein 1	Chd1	S	1678	0.450126	0.918275	-0.0723582	0.934053	0	0.999194	1	0.743716	0
E9PZM4	E9PZM4	Chromodomain-helicase-DNA-binding protein 2	Chd2	S	1365	0.0617015	0.550348	0.0939977	0	0.872465	1	0.991282	0.985159	0.976018
Q6PDQ2	Q6PDQ2	Chromodomain-helicase-DNA-binding protein 4	Chd4	S	1528	0.311246	0.891216	0.0208754	0.93026	0.978842	1	0.982577	0.979559	0.99862
A3KFM7	A3KFM7	Chromodomain-helicase-DNA-binding protein 6	Chd6	S	1357	0.562377	0.929297	-0.0235133	0	1	0	0	0.990709	0
Q09XV5	Q09XV5	Chromodomain-helicase-DNA-binding protein 8	Chd8	S	2213	0.240595	0.863841	-0.117126	1	0.862892	0.90635	0	0.877604	0
Q8BYH8	Q8BYH8	Chromodomain-helicase-DNA-binding protein 9	Chd9	S	653	0.236111	0.863413	-0.137308	0.990259	0.987381	0.853197	0.817551	1	0
Q8BJF9	Q8BJF9	Charged multivesicular body protein 2b	Chmp2b	S	199	0.970796	0.953847	-0.000598737	0.980585	1	0.964392	0.977266	0.98368	0.995192
Q9CQ10	Q9CQ10	Charged multivesicular body protein 3	Chmp3	S	200	0.659943	0.938286	-0.0457875	0.964467	1	0	0.924096	0.944762	0.856034
Q9D1P4	Q9D1P4	Cysteine and histidine-rich domain-containing protein 1	Chordc1	T	47	0.750004	0.943224	0.0114331	0	0	0	0.98349	1	0
Q9JKP8	Q9JKP8	Chromatin accessibility complex protein 1	Chrac1	S	122	0.721631	0.942473	0.0060803	0.963824	0.983549	0.97033	0.990106	0.970214	1
Q8BIW9	Q8BIW9	Chromosome transmission fidelity protein 18 homolog	Chtf18	S	70	0.347397	0.900328	0.111406	0	1	0.914826	0.913977	0.972825	0.888593
Q8WTY4	Q8WTY4	Anamorsin	Ciapin1	S	213	0.463619	0.919288	-0.070397	0.961688	0.835717	0	0	0	1
Q924A2	Q924A2	Protein capicua homolog	Cic	S	20	0.748615	0.943611	-0.0121719	0	1	0.993315	0	0.838238	0.879509
Q924A2	Q924A2	Protein capicua homolog	Cic	S	2147	0.268475	0.877467	0.0196607	0.964739	0.943967	0.961623	0.943149	1	0.981044
Q924A2	Q924A2	Protein capicua homolog	Cic	S	2148	0.268475	0.877467	0.0196607	0.964739	0.943967	0.961623	0.943149	1	0.981044
Q924A2	Q924A2	Protein capicua homolog	Cic	S	2247	0.980102	0.954179	0.000466327	0.982038	0.988209	0.699065	0.626349	0.97261	1
Q924A2	Q924A2	Protein capicua homolog	Cic	S	1080	0.396153	0.909253	0.0927596	1	0	0.913296	0.987412	0.947905	0.881593
Q924A2	Q924A2	Protein capicua homolog	Cic	T	2283	0.16185	0.811037	-0.139745	1	0.99519	0.775058	0.663698	0.944581	0
Q924A2	Q924A2	Protein capicua homolog	Cic	S	2275	0.758193	0.944529	-0.0051085	0.975195	0.964658	0.979141	1	0.955926	0.969463
Q924A2	Q924A2	Protein capicua homolog	Cic	S	2284	0.312655	0.89151	-0.0509051	0.89854	0.964658	0.971638	1	0.78072	0.938346
Q924A2	Q924A2	Protein capicua homolog	Cic	T	2283	0.330776	0.896469	0.167493	0.968073	0	0.717871	0	1	0.875471
Q924A2	Q924A2	Protein capicua homolog	Cic	S	1807	0.180557	0.829251	0.100154	0.940397	0	0	0	0.943297	1
Q924A2	Q924A2	Protein capicua homolog	Cic	S	1809	0.137692	0.781407	-0.0434863	1	0.963569	0.954554	0.953419	0.947006	0.840301
Q924A2	Q924A2	Protein capicua homolog	Cic	S	766	0.67153	0.939345	-0.00785097	0.934322	0.951099	0.963628	1	0.91418	0.944087
Q9DA19	Q9DA19	Corepressor interacting with RBPJ 1	Cir1	S	202	0.385342	0.908083	-0.067135	0.954017	0.905199	0.794618	0.919854	1	0
Q8BMK4	Q8BMK4	Cytoskeleton-associated protein 4	Ckap4	S	367	0.755164	0.944365	-0.00508094	0.978715	0.997074	1	0.990829	0.970411	0.988898
Q80TV8	Q80TV8	CLIP-associating protein 1	Clasp1	S	1193	0.491365	0.923588	-0.0130316	0.976621	1	0.971057	0.992663	0.952369	0.984106
Q80TV8	Q80TV8	CLIP-associating protein 1	Clasp1	S	1088	0.445367	0.917725	0.0127694	0.978759	0.961655	0.977597	0.958284	0.986087	1
Q80TV8	Q80TV8	CLIP-associating protein 1	Clasp1	S	598	0.308413	0.890316	0.0518421	0.806021	0.853131	0.871612	0.809197	0.822199	1
Q80TV8	Q80TV8	CLIP-associating protein 1	Clasp1	S	600	0.783476	0.945854	0.00689069	0.987466	0.938301	0.950037	0.987428	1	0.946364
Q80TV8	Q80TV8	CLIP-associating protein 1	Clasp1	S	794	0.104909	0.720348	-0.0308597	0.999509	1	0.874589	0.888933	0.943402	0.961066
Q80TV8	Q80TV8	CLIP-associating protein 1	Clasp1	S	636	0.952896	0.953202	0.00411422	1	0.903846	0.942395	0	0.948672	0.972882
Q8BRT1	Q8BRT1	CLIP-associating protein 2	Clasp2	S	376	0.20615	0.844146	0.168439	0.806386	0	0.853348	0	0.843239	1
Q8CFC7	Q8CFC7	CLK4-associating serine/arginine rich protein	Clasrp	S	335	0.565662	0.93119	-0.0103945	0.997343	0.970824	0.969177	1	0.976741	0.954284
Q8CFC7	Q8CFC7	CLK4-associating serine/arginine rich protein	Clasrp	S	285	0.720508	0.942407	0.0066438	0.956955	0.962181	0.933549	0.945901	1	0.944771
Q8CFC7	Q8CFC7	CLK4-associating serine/arginine rich protein	Clasrp	S	541	0.260746	0.874882	-0.114027	1	0.839542	0.966599	0.947715	0	0.928433
Q99LI2	Q99LI2	Chloride channel CLIC-like protein 1	Clcc1	S	497	0.505723	0.924459	0.0698962	0	0	0.826997	0	1	0
Q99LI2	Q99LI2	Chloride channel CLIC-like protein 1	Clcc1	S	58	0.280508	0.881618	0.0652171	0.982373	0.756804	0.987902	0.883918	0.961316	1
Q99LI2	Q99LI2	Chloride channel CLIC-like protein 1	Clcc1	S	59	0.916494	0.95135	-0.00623953	0	1	0.97459	0.974458	0	0.998691
Q99LI2	Q99LI2	Chloride channel CLIC-like protein 1	Clcc1	S	429	0.520793	0.925774	0.0478532	0	0	0.71687	1	0	0.725152
Q99LI2	Q99LI2	Chloride channel CLIC-like protein 1	Clcc1	S	433	0.494326	0.923161	0.0495028	0	0	0.71687	1	0	0.725152
Q5M6W3	Q5M6W3	Clathrin heavy chain linker domain-containing protein 1	Clhc1	Y	53	0.376024	0.905629	0.100617	0	0.972202	0	0.973037	0.95453	1
Q99KN9	Q99KN9	Clathrin interactor 1	Clint1	S	253	0.697893	0.941252	-0.0436294	0	0.987402	0.906534	1	0.850881	0.484174
Q922J3;Q9Z0H8	Q922J3	CAP-Gly domain-containing linker protein 1;CAP-Gly domain-containing linker protein 2	Clip1;Clip2	S	347;353	0.991002	0.954562	0.00018357	0.984816	0.992793	1	0.981169	0.998149	0.980029
Q922J3	Q922J3	CAP-Gly domain-containing linker protein 1	Clip1	S	194	0.814994	0.94729	0.0268982	0.96118	0.929966	0.994002	0	0.98605	1
Q922J3	Q922J3	CAP-Gly domain-containing linker protein 1	Clip1	S	199	0.678955	0.939219	0.0496971	0	0.696827	0.627621	0	1	0
Q922J3	Q922J3	CAP-Gly domain-containing linker protein 1	Clip1	S	203	0.968344	0.953757	-0.00206057	0.945956	0.844578	0.892721	0.858362	0.783219	1
Q9Z0H8	Q9Z0H8	CAP-Gly domain-containing linker protein 2	Clip2	S	924	0.317596	0.892998	-0.0172842	0.97965	1	0.978924	0.993044	0.957271	0.967683
O35491	O35491	Dual specificity protein kinase CLK2	Clk2	S	141	0.461787	0.91988	-0.0545497	0.852449	0.91986	0.890608	1	0.958314	0.594105
O35492	O35492	Dual specificity protein kinase CLK3	Clk3	S	157	0.14394	0.789841	-0.0592054	1	0.98532	0.917539	0.903071	0.963039	0.805145
O35493	O35493	Dual specificity protein kinase CLK4	Clk4	S	138	0.134489	0.776813	-0.11842	0.985041	1	0	0	0.920622	0
O35493;P22518	O35493	Dual specificity protein kinase CLK4;Dual specificity protein kinase CLK1	Clk4;Clk1	S	339;340	0.224399	0.857674	-0.0480466	0.937702	1	0.883376	0.888927	0.81678	0.956226
O35493;P22518	O35493	Dual specificity protein kinase CLK4;Dual specificity protein kinase CLK1	Clk4;Clk1	T	340;341	0.259905	0.874009	-0.149115	0.93055	0.863601	1	0.998067	0.923144	0
Q68FD5	Q68FD5	Clathrin heavy chain 1	Cltc	S	131	0.0207344	0.124399	0.348806	0	0	0	0.832978	1	0.948808
Q68FD5	Q68FD5	Clathrin heavy chain 1	Cltc	T	118	0.0206736	0.12277	0.348854	0	0	0	0.832978	1	0.948808
Q68FD5	Q68FD5	Clathrin heavy chain 1	Cltc	T	123	0.0199103	0.116854	0.346697	0	0	0	0.832978	1	0.948808
Q8R3P7	Q8R3P7	Clusterin-associated protein 1	Cluap1	S	409	0.331075	0.896487	0.124945	0.965642	0	0.867744	0.852188	1	0.826399
Q9DBC3	Q9DBC3	Cap-specific mRNA (nucleoside-2'-O-)-methyltransferase 1	Cmtr1	S	27	0.483109	0.922618	-0.0122828	0.979256	1	0.935527	0.913176	0.970203	0.974537
Q9DBC3	Q9DBC3	Cap-specific mRNA (nucleoside-2'-O-)-methyltransferase 1	Cmtr1	S	27	0.205705	0.846627	0.0791603	0.874873	0.819138	0.707374	0.964296	0.975823	1
Q9DBC3	Q9DBC3	Cap-specific mRNA (nucleoside-2'-O-)-methyltransferase 1	Cmtr1	S	28	0.259585	0.873929	0.0600791	0.802612	0.90996	0.877127	0.719666	1	0.910634
Q9DBC3	Q9DBC3	Cap-specific mRNA (nucleoside-2'-O-)-methyltransferase 1	Cmtr1	S	30	0.00631206	0.00460269	0.133059	0.701381	0.744913	0.824784	0.934845	1	0.959602
Q9DBC3	Q9DBC3	Cap-specific mRNA (nucleoside-2'-O-)-methyltransferase 1	Cmtr1	T	29	0.396644	0.909361	-0.0728109	1	0.827234	0.915932	0.907198	0	0.97754
Q70KF4	Q70KF4	Cardiomyopathy-associated protein 5	Cmya5	S	1956	0.324146	0.892864	-0.232362	0.949495	0	1	0	0	0
P53996	P53996	Cellular nucleic acid-binding protein	Cnbp	S	47	0.0117412	0.0336615	0.0964655	0	0	1	0.961645	0.836663	0.924455
P53996	P53996	Cellular nucleic acid-binding protein	Cnbp	S	48	0.82258	0.947148	-0.00637446	0	0.882111	0	0	1	0
P53996	P53996	Cellular nucleic acid-binding protein	Cnbp	S	49	0.0735209	0.613408	0.0429033	0.764394	0.827853	1	0.98537	0.902802	0.874205
Q69ZF7	Q69ZF7	Metal transporter CNNM4	Cnnm4	S	661	0.220561	0.855539	0.0578867	0.788238	0.748838	0.891975	0.926284	1	0.777948
Q8K0V4	Q8K0V4	CCR4-NOT transcription complex subunit 3	Cnot3	S	299	0.510704	0.925741	0.0185402	0.998712	0.879166	0.937951	0.997669	1	0.960096
Q8K0V4	Q8K0V4	CCR4-NOT transcription complex subunit 3	Cnot3	T	529	0.412433	0.912719	0.0196567	0.916381	0.907715	0.957476	1	0.90811	0.999134
Q8BT14	Q8BT14	CCR4-NOT transcription complex subunit 4	Cnot4	S	432	0.319675	0.893661	0.144067	0.865781	0	0	1	0.88386	0.993947
Q8BT14	Q8BT14	CCR4-NOT transcription complex subunit 4	Cnot4	S	324	0.34728	0.900293	-0.0172273	0.994688	0.991943	1	0.972094	0.94091	0.978161
Q9QXT0	Q9QXT0	Protein canopy homolog 2	Cnpy2	S	115	0.599248	0.934048	-0.0176597	0.937415	1	0.904722	0.753854	0.973972	0.881122
Q8BQ47	Q8BQ47	Protein canopy homolog 4	Cnpy4	S	64	0.103783	0.714346	-0.189911	1	0.98249	0	0	0.880419	0
Q3UMF0	Q3UMF0	Cordon-bleu protein-like 1	Cobll1	S	1028	0.986436	0.954402	-0.000863177	1	0.806105	0.947458	0.71708	0.846419	0.955526
Q3UMF0	Q3UMF0	Cordon-bleu protein-like 1	Cobll1	S	1092	0.917725	0.951801	0.0138299	0.89769	0.991145	0	0.933501	1	0.931668
Q3UMF0	Q3UMF0	Cordon-bleu protein-like 1	Cobll1	S	1266	0.230474	0.860864	0.0460457	0.907552	0.84159	0.86587	0.983204	0.917567	1
Q3UMF0	Q3UMF0	Cordon-bleu protein-like 1	Cobll1	S	366	0.746966	0.943915	0.00799499	1	0.951914	0.887287	0.95643	0.997476	0.980109
Q3UMF0	Q3UMF0	Cordon-bleu protein-like 1	Cobll1	S	896	0.460907	0.919236	-0.0517724	0.955723	0.995732	0.698139	0	0.760176	1
Q3UMF0	Q3UMF0	Cordon-bleu protein-like 1	Cobll1	S	897	0.721464	0.942667	0.051594	0	0.711864	0.833076	0	1	0
Q3UMF0	Q3UMF0	Cordon-bleu protein-like 1	Cobll1	T	1027	0.763148	0.944792	-0.0137964	0.874963	1	0.950771	0.719588	0.849378	0.958867
Q3UMF0	Q3UMF0	Cordon-bleu protein-like 1	Cobll1	T	1091	0.794912	0.946427	0.0109123	0.87952	0.971083	0.901809	1	0.896327	0.987389
Q3UMF0	Q3UMF0	Cordon-bleu protein-like 1	Cobll1	T	1043	0.3049	0.888616	-0.0423647	1	0.932652	0.62812	0	0.94216	0.824809
Q3UMF0	Q3UMF0	Cordon-bleu protein-like 1	Cobll1	T	298	0.0132921	0.0460861	-0.324139	1	0.925182	0.811986	0	0	0
Q3UMF0	Q3UMF0	Cordon-bleu protein-like 1	Cobll1	S	546	0.571798	0.93174	-0.0776711	0.849439	0.863195	0	0.907192	1	0
Q3UMF0	Q3UMF0	Cordon-bleu protein-like 1	Cobll1	S	1044	0.750921	0.943825	-0.0282137	1	0.932652	0.964053	0	0.94216	0.880151
Q3UMF0	Q3UMF0	Cordon-bleu protein-like 1	Cobll1	S	551	0.574312	0.932342	-0.0767393	0.849439	0.863195	0	0.907192	1	0
Q3UMF0	Q3UMF0	Cordon-bleu protein-like 1	Cobll1	S	993	0.777981	0.945573	-0.00440586	0.994961	0.999967	0.9799	0.981708	1	0.977457
Q3UMF0	Q3UMF0	Cordon-bleu protein-like 1	Cobll1	S	300	0.737521	0.942882	-0.0272157	0.879395	1	0	0.894805	0.880269	0.891559
Q3UMF0	Q3UMF0	Cordon-bleu protein-like 1	Cobll1	S	313	0.220087	0.852418	-0.0525856	0	0.962616	1	0	0	0
Q3UMF0	Q3UMF0	Cordon-bleu protein-like 1	Cobll1	S	546	0.990078	0.95453	-0.000208216	1	0.971546	0.971138	0.9892	0.992633	0.978174
Q3UMF0	Q3UMF0	Cordon-bleu protein-like 1	Cobll1	S	1214	0.220093	0.855509	-0.186985	0.984593	0.939669	0	1	0.842019	0
Q3UMF0	Q3UMF0	Cordon-bleu protein-like 1	Cobll1	S	1215	0.828145	0.948024	0.0112412	0.985158	0.855286	0.987279	0.877675	0.875439	1
Q8CI04	Q8CI04	Conserved oligomeric Golgi complex subunit 3	Cog3	S	655	0.626143	0.936139	0.0100402	0.954999	0.95131	0.914094	0.957159	1	0.944068
Q8CI04	Q8CI04	Conserved oligomeric Golgi complex subunit 3	Cog3	S	528	0.769945	0.945757	-0.0283377	0	1	0	0	0.99289	0
Q8R1U1	Q8R1U1	Conserved oligomeric Golgi complex subunit 4	Cog4	S	6	0.532537	0.928019	0.0209417	0.87612	1	0.826424	0.927599	0.994591	0.966847
Q9JJA2	Q9JJA2	Conserved oligomeric Golgi complex subunit 8	Cog8	S	536	0.900274	0.951155	0.00289665	0.987521	0.876993	0.877165	0.916677	1	0.884315
Q9EQG9	Q9EQG9	Collagen type IV alpha-3-binding protein	Col4a3bp	S	373	0.875793	0.949774	-0.0139883	1	0	0	0	0	0.965514
Q9EQG9	Q9EQG9	Collagen type IV alpha-3-binding protein	Col4a3bp	S	377	0.240371	0.864641	-0.16337	0	1	0.866951	0	0	0
O88587	O88587	Catechol O-methyltransferase	Comt	S	261	0.924058	0.9521	0.00164578	0.990663	0.996897	0.959964	0.988403	0.991778	1
Q8CIE6	Q8CIE6	Coatomer subunit alpha;Xenin;Proxenin	Copa	S	173	0.593029	0.933546	0.0132044	0.931464	0.93307	0.907933	0.918028	0.910178	1
O89079	O89079	Coatomer subunit epsilon	Cope	S	10	0.28806	0.883188	0.119798	0.899347	0	0.724534	0	0.820706	1
O89079	O89079	Coatomer subunit epsilon	Cope	S	13	0.0472101	0.438248	-0.12234	0.980477	1	0.93963	0.898094	0.879605	0.671675
Q8K1Z0	Q8K1Z0	Ubiquinone biosynthesis protein COQ9, mitochondrial	Coq9	S	81	0.311192	0.89247	0.0726383	0	0	0.872836	0.98505	0	1
Q812E0	Q812E0	Cytoplasmic polyadenylation element-binding protein 2	Cpeb2	S	21	0.680722	0.939949	0.00881327	0.914243	0.955867	0.832758	0.883187	0.915811	1
Q7TN99	Q7TN99	Cytoplasmic polyadenylation element-binding protein 3	Cpeb3	S	444	0.901952	0.950144	0.00925973	0.951071	0	0.988057	0.554902	0	1
Q7TN98	Q7TN98	Cytoplasmic polyadenylation element-binding protein 4	Cpeb4	S	97	0.621987	0.935829	0.0264038	0.851082	0.711881	1	0.756626	0.778769	0.900818
Q7TN98	Q7TN98	Cytoplasmic polyadenylation element-binding protein 4	Cpeb4	S	99	0.270421	0.878019	-0.0336748	0.923193	1	0.834772	0.84742	0.948455	0.821096
Q9EPU4	Q9EPU4	Cleavage and polyadenylation specificity factor subunit 1	Cpsf1	S	763	0.825674	0.947915	-0.0204366	0.646633	1	0	0.963627	0.775979	0.780671
Q6NVF9	Q6NVF9	Cleavage and polyadenylation specificity factor subunit 6	Cpsf6	T	407	0.552533	0.929383	-0.0545188	0	1	0	0	0	0.78495
Q8BTV2	Q8BTV2	Cleavage and polyadenylation specificity factor subunit 7	Cpsf7	T	203	0.262284	0.874979	0.0529303	0.822592	0.787042	0.802592	0.818886	0.801473	1
P45481	P45481	CREB-binding protein	Crebbp	S	2064	0.565044	0.931134	0.0104194	0.936625	0.917359	1	0.963978	0.977602	0.92785
P45481	P45481	CREB-binding protein	Crebbp	S	1077	0.864589	0.949662	-0.00353669	0.995735	0.955184	1	0.950261	0.946637	0.990286
P47941	P47941	Crk-like protein	Crkl	S	107	0.46139	0.919847	0.0231799	0.881684	1	0.999801	0.952311	0.976158	0.987472
P63154	P63154	Crooked neck-like protein 1	Crnkl1	S	689	0.0653059	0.565914	0.16401	0	0	0.992494	0	0.94951	1
P63154	P63154	Crooked neck-like protein 1	Crnkl1	Y	275	0.492764	0.922877	-0.0479636	1	0	0	0	0.884554	0
P63154	P63154	Crooked neck-like protein 1	Crnkl1	Y	277	0.46114	0.918145	-0.0511239	1	0	0	0	0.884554	0
Q68ED7	Q68ED7	CREB-regulated transcription coactivator 1	Crtc1	S	64	0.890427	0.950463	0.0011007	0.971237	0	0	0.821433	1	0.618934
Q3U182	Q3U182	CREB-regulated transcription coactivator 2	Crtc2	S	622	0.451163	0.918959	0.0700664	0	0	1	0	0	0.935509
Q3U182	Q3U182	CREB-regulated transcription coactivator 2	Crtc2	S	623	0.863358	0.949024	-0.021256	0	0.839854	0	1	0.854907	0
Q3U182	Q3U182	CREB-regulated transcription coactivator 2	Crtc2	S	490	0.35469	0.902114	-0.0594598	0.96997	0.761595	0.961451	1	0	0.881175
Q91X84	Q91X84	CREB-regulated transcription coactivator 3	Crtc3	S	370	0.193914	0.837831	-0.14737	0	1	0.909852	0.616157	0	0
Q91X84	Q91X84	CREB-regulated transcription coactivator 3	Crtc3	S	62	0.106978	0.725107	-0.0386258	1	0.93444	0.950128	0.907144	0.886679	0.882153
Q9JMK2	Q9JMK2	Casein kinase I isoform epsilon	Csnk1e	S	363	0.206425	0.847086	0.0820545	0.710895	0.959182	0.916734	0.937773	0.941907	1
P67871	P67871	Casein kinase II subunit beta	Csnk2b	S	209	0.104218	0.718029	0.0640211	0.929592	0.805873	0.974858	1	0.984946	0.956915
P97315	P97315	Cysteine and glycine-rich protein 1	Csrp1	S	192	0.685898	0.940285	-0.00681064	0.975387	1	0.948683	0.961305	0.972494	0.982913
Q8BIQ5	Q8BIQ5	Cleavage stimulation factor subunit 2	Cstf2	S	527	0.10386	0.72001	-0.116524	1	0.655885	0.702217	0.739631	0.622701	0
Q99LI7	Q99LI7	Cleavage stimulation factor subunit 3	Cstf3	S	691	0.574414	0.931951	0.0195957	0.829668	1	0.98804	0.844314	0.962968	0.970483
Q5SUQ9	Q5SUQ9	CST complex subunit CTC1	Ctc1	T	1161	0.0993149	0.703007	0.242873	0	0	1	0	0.855758	0.853108
Q7TSG2	Q7TSG2	RNA polymerase II subunit A C-terminal domain phosphatase	Ctdp1	S	730	0.0744732	0.6178	-0.0439628	1	0.984592	0.84589	0.943639	0.880012	0.833546
P26231;Q61301	P26231	Catenin alpha-1;Catenin alpha-2	Ctnna1;Ctnna2	S	655;654	0.0685732	0.588644	0.0381258	0.936349	0.91805	0.954001	0.950236	0.974663	1
P26231	P26231	Catenin alpha-1	Ctnna1	S	641	0.20657	0.847347	0.0231656	0.967282	0.953526	0.956555	0.96541	1	0.981365
P26231;Q61301	P26231	Catenin alpha-1;Catenin alpha-2	Ctnna1;Ctnna2	S	655;654	0.152936	0.802397	0.0638364	0.798879	0.738873	0	0	1	0.809557
P26231;Q61301	P26231	Catenin alpha-1;Catenin alpha-2	Ctnna1;Ctnna2	T	654;653	0.150396	0.798767	0.0638364	0.798879	0.738873	0	0	1	0.809557
Q02248	Q02248	Catenin beta-1	Ctnnb1	S	45	0.0482933	0.453878	-0.0808516	1	0.995674	0.781083	0.928687	0	0.843295
Q02248	Q02248	Catenin beta-1	Ctnnb1	S	191	0.345368	0.898678	-0.0440767	0.733533	1	0.88584	0	0.76742	0.715654
Q02248	Q02248	Catenin beta-1	Ctnnb1	S	675	0.2987	0.887555	0.0219549	0.938255	0.918755	1	0.992015	0.994019	0.938052
Q02248	Q02248	Catenin beta-1	Ctnnb1	S	552	0.925438	0.952151	-0.00344959	0.896198	0.891972	0.86448	1	0.9046	0.873159
Q02248	Q02248	Catenin beta-1	Ctnnb1	T	556	0.754661	0.944305	-0.0420944	0.819257	0.89181	1	0	0.885822	0.684443
P30999	P30999	Catenin delta-1	Ctnnd1	S	252	0.73692	0.943352	-0.0121758	1	0.941072	0.988821	0.84943	0.91124	0.984198
P30999	P30999	Catenin delta-1	Ctnnd1	S	269	0.0512994	0.474154	0.0586469	0.86244	0.929624	0.979555	0.947508	1	0.979952
P30999	P30999	Catenin delta-1	Ctnnd1	S	47	0.28023	0.881506	-0.0434702	0.97658	1	0.965211	0.77743	0.911258	0.887947
P30999	P30999	Catenin delta-1	Ctnnd1	Y	96	0.170187	0.818154	-0.116588	0	1	0.662719	0.784693	0	0
P30999	P30999	Catenin delta-1	Ctnnd1	S	346	0.065801	0.572389	0.228135	0.666446	0	0	0.868651	1	0.950258
P30999	P30999	Catenin delta-1	Ctnnd1	S	349	0.0296853	0.252731	0.278001	0	0	0	0.897074	1	0.981351
P30999	P30999	Catenin delta-1	Ctnnd1	S	352	0.873936	0.949571	-0.00445063	0.898439	0	0	0	1	0
P30999	P30999	Catenin delta-1	Ctnnd1	S	225	0.72999	0.942697	0.0333971	0.835009	0	0	0	0	1
P30999	P30999	Catenin delta-1	Ctnnd1	S	230	0.767967	0.945148	-0.0240805	1	0.886481	0	0.828988	0.945918	0.851295
P30999	P30999	Catenin delta-1	Ctnnd1	S	232	0.974882	0.953992	-0.00310586	0.648103	0.971606	0.817288	0.882635	1	0.607787
P30999	P30999	Catenin delta-1	Ctnnd1	S	320	0.926014	0.952173	0.00443627	0.734164	0.931388	0.971634	1	0.917478	0.765954
P30999	P30999	Catenin delta-1	Ctnnd1	S	4	0.599948	0.934106	-0.0106668	0.988249	1	0.97254	0.900548	0.949526	0.989758
P30999	P30999	Catenin delta-1	Ctnnd1	S	920	0.390171	0.909167	0.0794556	0	0.999651	0.817526	0.79641	1	0.859461
P30999	P30999	Catenin delta-1	Ctnnd1	S	268	0.364203	0.903917	-0.0193526	0.954682	0.980477	0.997703	1	0.912886	0.963303
P70698	P70698	CTP synthase 1	Ctps1	S	562	0.190898	0.836467	-0.0488208	0.986378	1	0.974043	0.962994	0.98062	0.862386
Q62018	Q62018	RNA polymerase-associated protein CTR9 homolog	Ctr9	T	925	0.812527	0.947291	-0.0044835	0.976122	1	0.967711	0.990225	0.997916	0.964909
Q62018	Q62018	RNA polymerase-associated protein CTR9 homolog	Ctr9	S	941	0.320026	0.893874	0.0730691	0.781361	0.895903	0	0.928989	1	0.998688
Q62018	Q62018	RNA polymerase-associated protein CTR9 homolog	Ctr9	S	943	0.322291	0.892274	0.0730691	0.781361	0.895903	0	0.928989	1	0.998688
P18242	P18242	Cathepsin D	Ctsd	Y	345	0.164871	0.812067	-0.0512845	0	1	0	0.800327	0	0
P18242	P18242	Cathepsin D	Ctsd	Y	352	0.194156	0.840129	-0.0454818	0	1	0	0.800327	0	0
Q60598	Q60598	Src substrate cortactin	Cttn	S	11	0.186548	0.833327	-0.032494	0.987781	1	0.968126	0.952235	0.976653	0.915493
Q60598	Q60598	Src substrate cortactin	Cttn	S	418	0.242329	0.866573	0.0413651	0.855713	0.951006	0.909066	0.901287	1	0.931092
Q60598	Q60598	Src substrate cortactin	Cttn	T	401	0.401344	0.9109	0.0156891	0.992898	0.957122	0.966968	0.952347	1	0.995726
Q60598	Q60598	Src substrate cortactin	Cttn	S	405	0.768832	0.945046	-0.0486031	0.94117	0.845354	0.908636	0	0.645369	1
Q60598	Q60598	Src substrate cortactin	Cttn	S	407	0.434677	0.916117	0.0400105	0.994093	0.804135	0.831281	0.799886	0.926642	1
Q60598	Q60598	Src substrate cortactin	Cttn	S	417	0.0554106	0.506196	0.0380915	0.947922	0.938036	0.957461	0.946986	0.997379	1
Q60598	Q60598	Src substrate cortactin	Cttn	T	401	0.0478343	0.444683	0.0405441	0.94117	0.931354	0.950642	0.940241	0.990274	1
Q60598	Q60598	Src substrate cortactin	Cttn	S	417	0.593838	0.933602	0.0207847	0.866419	0.999173	0.832422	0.78984	0.932365	1
Q60598	Q60598	Src substrate cortactin	Cttn	S	418	0.558639	0.930524	-0.0399148	1	0.809968	0.882654	0.73062	0.797298	0.895142
Q60598	Q60598	Src substrate cortactin	Cttn	T	401	0.469848	0.919513	-0.055218	0.965929	1	0.782844	0	0.943396	0.826783
Q60598	Q60598	Src substrate cortactin	Cttn	S	407	0.0951848	0.68942	0.184845	0.874141	0	0.952108	0.836987	1	0.981532
Q60598	Q60598	Src substrate cortactin	Cttn	S	417	0.851566	0.949087	-0.00996975	1	0.835027	0.9293	0.905959	0.837177	0.967655
Q99LJ0	Q99LJ0	CTTNBP2 N-terminal-like protein	Cttnbp2nl	S	488	0.703137	0.941115	-0.0508513	0.788389	0.760126	0	0	1	0
Q99LJ0	Q99LJ0	CTTNBP2 N-terminal-like protein	Cttnbp2nl	S	481	0.441519	0.917108	-0.0379365	0.903021	1	0.987759	0.826196	0.75612	0.970954
Q99LJ0	Q99LJ0	CTTNBP2 N-terminal-like protein	Cttnbp2nl	S	522	0.251951	0.868266	-0.12714	0	1	0	0.945152	0	0
Q99LJ0	Q99LJ0	CTTNBP2 N-terminal-like protein	Cttnbp2nl	S	562	0.273478	0.879144	0.0408441	0.821211	0.82559	0.934666	1	0.827285	0.97387
Q99LJ0	Q99LJ0	CTTNBP2 N-terminal-like protein	Cttnbp2nl	S	567	0.808444	0.947093	-0.00734165	0.888876	1	0.953582	0.95875	0.939668	0.92629
Q99LJ0	Q99LJ0	CTTNBP2 N-terminal-like protein	Cttnbp2nl	T	513	0.00108107	2.08852e-07	0.20027	0	0	0	0	1	0.933557
Q99LJ0	Q99LJ0	CTTNBP2 N-terminal-like protein	Cttnbp2nl	S	562	0.362026	0.903409	0.0359316	0.726978	0.795085	1	0.833486	0.875373	0.797219
Q99LJ0	Q99LJ0	CTTNBP2 N-terminal-like protein	Cttnbp2nl	S	567	0.362026	0.903409	0.0359316	0.726978	0.795085	1	0.833486	0.875373	0.797219
Q99J10	Q99J10	Cytoplasmic tRNA 2-thiolation protein 1	Ctu1	S	416	0.784948	0.945929	0.00559243	0.955847	0.951082	0.925197	0.956	1	0.929589
Q8R3V6	Q8R3V6	CUE domain-containing protein 1	Cuedc1	S	182	0.668995	0.9391	-0.00353648	0.769353	0	0	1	0	0.773272
A2A432	A2A432	Cullin-4B	Cul4b	S	149	0.209133	0.848558	0.190628	0.946855	0	0.982263	1	0.981033	0.929718
Q8VE73	Q8VE73	Cullin-7	Cul7	S	351	0.00116254	3.22913e-07	0.152337	0	0.668402	0.817004	0.786341	1	0.964263
P53564	P53564	Homeobox protein cut-like 1	Cux1	S	427	0.722008	0.942322	-0.0263569	1	0	0.853567	0.928651	0.848532	0.632589
Q8C5N3	Q8C5N3	Pre-mRNA-splicing factor CWC22 homolog	Cwc22	S	829	0.818526	0.947578	-0.00396477	0.960607	0.986458	1	0.976411	0.954775	0.978058
Q8C5N3	Q8C5N3	Pre-mRNA-splicing factor CWC22 homolog	Cwc22	S	105	0.361852	0.901978	0.144743	0.982866	0	0	0.969577	0.977029	1
Q8C5N3	Q8C5N3	Pre-mRNA-splicing factor CWC22 homolog	Cwc22	S	106	0.00487571	0.00167705	-0.119234	0.929858	1	0.993351	0.968005	0.77402	0.725179
Q8C5N3	Q8C5N3	Pre-mRNA-splicing factor CWC22 homolog	Cwc22	S	60	0.848019	0.948932	0.00471612	0.879157	1	0.864102	0.830959	0.950456	0.950855
Q3TKY6	Q3TKY6	Peptidyl-prolyl cis-trans isomerase CWC27 homolog	Cwc27	S	206	0.374093	0.906447	0.0646389	0.560773	0.977019	0	0.708263	0.855061	1
O35188	O35188	Fractalkine;Processed fractalkine	Cx3cl1	S	262	0.977003	0.954069	0.00046821	0.989411	0.983844	0.993523	0.976111	0.974925	1
Q9CQX2	Q9CQX2	Cytochrome b5 type B	Cyb5b	S	9	0.0521693	0.477562	0.0758148	0	0	0	0	1	0.883623
Q9CQX2	Q9CQX2	Cytochrome b5 type B	Cyb5b	S	33	0.66852	0.937861	-0.0414641	1	0	0.757898	0.847285	0	0.850409
Q9CQX2	Q9CQX2	Cytochrome b5 type B	Cyb5b	T	3	0.235024	0.863124	0.0496726	0.809826	0.92815	0.808889	0.950728	0.939405	1
Q9DCN2	Q9DCN2	NADH-cytochrome b5 reductase 3;NADH-cytochrome b5 reductase 3 membrane-bound form;NADH-cytochrome b5 reductase 3 soluble form	Cyb5r3	T	264	0.594928	0.93496	0.0134791	0.801452	1	0	0	0	0
Q6VVW9	Q6VVW9	Vitamin D 25-hydroxylase	Cyp2r1	T	433	0.259055	0.872511	0.0946122	0	0	0	1	0.777588	0.809253
Q6VVW9	Q6VVW9	Vitamin D 25-hydroxylase	Cyp2r1	Y	431	0.265773	0.876441	0.0874394	0	0	0	1	0.777588	0.809253
Q8VDY9	Q8VDY9	Caspase activity and apoptosis inhibitor 1	Caap1	S	306	0.491077	0.922893	-0.0780763	0.894544	0.848831	0.849028	0.874647	0	1
Q8VDY9	Q8VDY9	Caspase activity and apoptosis inhibitor 1	Caap1	S	307	0.874556	0.950086	0.00565348	1	0.955401	0.823403	0.976337	0.980698	0.99503
Q3UHX9	Q3UHX9	Putative methyltransferase C9orf114 homolog	D2Wsu81e	S	378	0.119763	0.741984	-0.0655511	1	0	0.934493	0.994003	0	0
Q3UHX9	Q3UHX9	Putative methyltransferase C9orf114 homolog	D2Wsu81e	S	361	0.73388	0.943179	0.0190457	0.993956	0.86679	0.715342	1	0.972101	0.969598
Q3UHX9	Q3UHX9	Putative methyltransferase C9orf114 homolog	D2Wsu81e	S	374	0.489958	0.923245	0.0667854	0	0	1	0.778506	0.989146	0
Q3UHX9	Q3UHX9	Putative methyltransferase C9orf114 homolog	D2Wsu81e	S	378	0.277495	0.880558	0.0354898	0.952566	0.830696	0.957745	1	0.998605	0.929222
P98078	P98078	Disabled homolog 2	Dab2	S	727	0.511868	0.925983	0.0611301	1	0	0	0	0.793332	0.996528
P98078	P98078	Disabled homolog 2	Dab2	S	461	0.233046	0.863126	-0.120079	0.974022	0	1	0	0	0
P98078	P98078	Disabled homolog 2	Dab2	S	468	0.235839	0.863861	0.110394	0	0.906672	0	0.96254	0.991667	1
Q3UHC7	Q3UHC7	Disabled homolog 2-interacting protein	Dab2ip	S	747	0.915997	0.95177	-0.0111873	0.888336	0.808891	1	0	0.916225	0.738022
Q0PHV7	Q0PHV7	Dapper homolog 3	Dact3	S	6	0.693382	0.940761	-0.00638171	0.978096	1	0.975978	0.977587	0.969252	0.986351
Q0PHV7	Q0PHV7	Dapper homolog 3	Dact3	S	160	0.00117528	3.24331e-07	-0.165006	1	0.963082	0.940027	0.912568	0	0
Q0PHV7	Q0PHV7	Dapper homolog 3	Dact3	S	165	0.148979	0.796736	-0.189944	1	0.970328	0.97887	0.757086	0	0.901185
Q0PHV7	Q0PHV7	Dapper homolog 3	Dact3	S	409	0.797876	0.946573	0.0121268	0.920665	0.842519	0.999796	0.867079	1	0.811395
Q62165	Q62165	Dystroglycan;Alpha-dystroglycan;Beta-dystroglycan	Dag1	T	788	0.0858084	0.663847	-0.0416837	0.975444	1	0.965739	0.955466	0.886318	0.942778
Q91XC8	Q91XC8	Death-associated protein 1	Dap	S	51	0.476696	0.92179	-0.0261606	0.996204	1	0.879289	0.987414	0.956666	0.974613
Q91XC8	Q91XC8	Death-associated protein 1	Dap	S	2	0.804781	0.946917	0.00407162	0.955679	0.9629	0.979796	1	0.962618	0.965475
Q91XC8	Q91XC8	Death-associated protein 1	Dap	S	3	0.804781	0.946917	0.00407162	0.955679	0.9629	0.979796	1	0.962618	0.965475
Q91XC8	Q91XC8	Death-associated protein 1	Dap	T	50	0.799341	0.946647	0.00981802	0.998204	0.943805	0.865008	0.997979	1	0.971631
Q9QXT1	Q9QXT1	Dual adapter for phosphotyrosine and 3-phosphotyrosine and 3-phosphoinositide	Dapp1	Y	139	0.16049	0.810128	0.0893073	0.731458	0.84839	0.874068	0	0.981285	1
Q9QXS6	Q9QXS6	Drebrin	Dbn1	S	274	0.229988	0.860584	-0.0544841	0.829947	1	0.798459	0.686104	0.828163	0.786242
Q9QXS6	Q9QXS6	Drebrin	Dbn1	S	141	0.677423	0.939732	0.0127243	0.882778	0.953335	0.965901	0.995923	0.88496	1
Q9QXS6	Q9QXS6	Drebrin	Dbn1	S	142	0.591025	0.933378	-0.00886568	0.970634	0.987918	0.995118	1	0.961712	0.97411
Q9QXS6	Q9QXS6	Drebrin	Dbn1	S	387	0.195031	0.839452	0.0547812	0.901573	0.881222	0.83687	1	0.993822	0.979353
Q62418	Q62418	Drebrin-like protein	Dbnl	S	277	0.32726	0.895396	-0.0443791	1	0.99424	0.872942	0.970567	0.999387	0.848272
Q62418	Q62418	Drebrin-like protein	Dbnl	S	291	0.167215	0.817195	-0.120161	0	0.816387	0.792642	1	0	0
Q62418	Q62418	Drebrin-like protein	Dbnl	T	299	0.841754	0.948647	0.0122532	0.845096	0.935092	0.923464	0.752371	0.819996	1
Q923B1	Q923B1	Lariat debranching enzyme	Dbr1	S	505	0.263573	0.875506	0.0224982	0.962032	0.923477	0.938881	0.930891	0.964878	1
Q923B1	Q923B1	Lariat debranching enzyme	Dbr1	S	491	0.905511	0.95132	0.013268	1	0.818409	0	0.912558	0.869429	0.995245
Q923B1	Q923B1	Lariat debranching enzyme	Dbr1	S	28	0.728558	0.942876	-0.00603333	1	0.954183	0.957564	0.973605	0.968149	0.960909
Q80T85	Q80T85	DDB1- and CUL4-associated factor 5	Dcaf5	S	799	0.7923	0.9463	-0.00431118	0.951677	0.956228	0.987782	1	0.932723	0.960366
Q80T85	Q80T85	DDB1- and CUL4-associated factor 5	Dcaf5	S	531	0.0855614	0.65965	-0.163889	0.989864	0.887788	1	0.911892	0.808613	0
Q8N7N5	Q8N7N5	DDB1- and CUL4-associated factor 8	Dcaf8	S	123	0.590613	0.933342	0.0101094	0.993261	0.947808	0.971286	0.98218	1	0.976757
Q8N7N5	Q8N7N5	DDB1- and CUL4-associated factor 8	Dcaf8	S	124	0.815527	0.947431	-0.00871403	0.979298	1	0.957632	0.798096	0.985942	0.963026
Q8N7N5	Q8N7N5	DDB1- and CUL4-associated factor 8	Dcaf8	S	100	0.591648	0.933433	-0.00860768	0.981662	0.993787	1	0.987324	0.972706	0.979041
P43346	P43346	Deoxycytidine kinase	Dck	S	11	0.809378	0.94714	-0.00396119	0.990364	0.99977	0.980677	1	0.979445	0.998256
Q9JLM8	Q9JLM8	Serine/threonine-protein kinase DCLK1	Dclk1	S	736	0.411373	0.912533	-0.0228005	0.986361	0.989133	0.981678	0.994753	0.895707	1
Q9JLM8	Q9JLM8	Serine/threonine-protein kinase DCLK1	Dclk1	S	337	0.912394	0.951431	-0.00876056	0.834688	0.653857	0	0.711183	1	0
Q9JLM8	Q9JLM8	Serine/threonine-protein kinase DCLK1	Dclk1	S	32	0.243514	0.867122	0.0474065	0.900068	0.817141	0.73366	0.605642	1	0.901959
Q9JLM8	Q9JLM8	Serine/threonine-protein kinase DCLK1	Dclk1	S	36	0.933994	0.952424	0.00947133	1	0.900626	0	0.912618	0.963742	0.968403
Q9JLM8	Q9JLM8	Serine/threonine-protein kinase DCLK1	Dclk1	T	34	0.356303	0.901882	0.0315848	0.959213	0.870836	0	0.64544	1	0.961228
Q9JLM8	Q9JLM8	Serine/threonine-protein kinase DCLK1	Dclk1	S	352	0.857446	0.949353	0.00278567	0.989897	0.98444	0.97739	0.974235	0.983373	1
Q9JLM8	Q9JLM8	Serine/threonine-protein kinase DCLK1	Dclk1	S	2	0.7251	0.942676	0.00814168	0.978505	0.908357	0.926507	0.845373	0.93044	1
Q9JLM8	Q9JLM8	Serine/threonine-protein kinase DCLK1	Dclk1	S	307	0.966851	0.953703	-0.00116931	1	0.926557	0.933655	0.792085	0.975031	0.945717
Q9JLM8	Q9JLM8	Serine/threonine-protein kinase DCLK1	Dclk1	S	332	0.0782319	0.628944	0.0998142	0.76028	0	0	0	0.809028	1
Q9JLM8	Q9JLM8	Serine/threonine-protein kinase DCLK1	Dclk1	S	337	0.174351	0.822823	0.107502	0.97347	0.689738	0.857777	0.82185	0.992217	1
Q9JLM8	Q9JLM8	Serine/threonine-protein kinase DCLK1	Dclk1	S	32	0.78593	0.945978	-0.00942316	0.944188	0.987962	0.912562	0.993981	1	0.902445
Q9JLM8	Q9JLM8	Serine/threonine-protein kinase DCLK1	Dclk1	T	336	0.270343	0.87697	-0.171232	0	1	0	0.939813	0	0
Q9JLM8	Q9JLM8	Serine/threonine-protein kinase DCLK1	Dclk1	S	332	0.905649	0.950971	-0.0086861	0.834688	0.653857	0	0.711183	1	0
Q8K4J0	Q8K4J0	Protein artemis	Dclre1c	S	385	0.00840825	0.0121674	0.105332	0	0	0.647377	0	0.984647	1
Q8K4J0	Q8K4J0	Protein artemis	Dclre1c	T	380	0.00909167	0.0141874	0.102639	0	0	0.647377	0	0.984647	1
Q91YD3	Q91YD3	mRNA-decapping enzyme 1A	Dcp1a	S	542	0.415268	0.912622	-0.118143	0.648156	1	0.963476	0	0	0.765426
Q91YD3	Q91YD3	mRNA-decapping enzyme 1A	Dcp1a	S	543	0.852805	0.949146	0.00417643	0.978151	0.969741	1	0.924357	0.975107	0.986792
Q91YD3	Q91YD3	mRNA-decapping enzyme 1A	Dcp1a	S	545	0.828559	0.948045	0.00626532	1	0.924556	0.94535	0.76604	0.993957	0.967014
Q91YD3	Q91YD3	mRNA-decapping enzyme 1A	Dcp1a	S	162	0.311095	0.890231	-0.117305	0	0.931	0	1	0	0
Q91YD3	Q91YD3	mRNA-decapping enzyme 1A	Dcp1a	S	372	0.760206	0.944637	-0.00773769	0.974012	0.961326	0.93004	0.984535	1	0.904522
Q9DAR7	Q9DAR7	m7GpppX diphosphatase	Dcps	S	100	0.896524	0.951	0.00442612	0.953308	0.878757	0.846591	0.894	1	0.850447
Q9CWS0	Q9CWS0	N(G),N(G)-dimethylarginine dimethylaminohydrolase 1	Ddah1	S	33	0.801945	0.946778	-0.00394646	0.989952	1	0.962651	0.974674	0.98138	0.995591
A2ADY9	A2ADY9	Protein DDI1 homolog 2	Ddi2	S	194	0.0202001	0.116692	0.0939889	0	0	0.951698	1	0.766946	0.872235
Q80Y44	Q80Y44	Probable ATP-dependent RNA helicase DDX10	Ddx10	S	549	0.712415	0.941926	0.00652661	0.961852	0.988299	0.957639	0.991569	0.975749	1
Q9JJY4	Q9JJY4	Probable ATP-dependent RNA helicase DDX20	Ddx20	S	569	0.81137	0.947062	0.0381637	1	0	0.998679	0	0.997825	0.637288
Q9JIK5	Q9JIK5	Nucleolar RNA helicase 2	Ddx21	S	118	0.570716	0.931641	0.0111075	0.955235	0.972248	0.991384	0.987919	0.95809	1
Q9JIK5	Q9JIK5	Nucleolar RNA helicase 2	Ddx21	S	89	0.00398263	0.000802876	0.15152	0	0	0	0	0.906927	1
Q9JIK5	Q9JIK5	Nucleolar RNA helicase 2	Ddx21	S	13	0.913213	0.951671	0.00483871	1	0.825905	0.802552	0.920791	0.951306	0.893067
Q9JIK5	Q9JIK5	Nucleolar RNA helicase 2	Ddx21	S	192	0.622769	0.935902	0.00774203	0.980657	0.978037	0.973335	0.95751	0.987235	1
Q9JIK5	Q9JIK5	Nucleolar RNA helicase 2	Ddx21	S	155	0.126632	0.765931	0.126718	0.875664	0	0	0	0.900019	1
Q9JIK5	Q9JIK5	Nucleolar RNA helicase 2	Ddx21	T	114	0.330468	0.895399	-0.168101	0.94429	0	0	1	0	0
Q9JIK5	Q9JIK5	Nucleolar RNA helicase 2	Ddx21	T	90	0.274283	0.879429	-0.0910243	0.94627	0	0	1	0	0
Q9ESV0	Q9ESV0	ATP-dependent RNA helicase DDX24	Ddx24	S	123	0.706246	0.941553	0.00805864	0.990772	0.940924	0.963386	0.918925	1	0.961848
Q9ESV0	Q9ESV0	ATP-dependent RNA helicase DDX24	Ddx24	S	80	0.469567	0.920947	0.0124166	0.968918	0.980807	0.962147	0.989434	0.989517	1
Q9ESV0	Q9ESV0	ATP-dependent RNA helicase DDX24	Ddx24	S	288	0.891684	0.950804	-0.00324473	0.975441	0.969802	0.973048	0.928388	0.935145	1
Q9ESV0	Q9ESV0	ATP-dependent RNA helicase DDX24	Ddx24	Y	118	0.318535	0.890325	0.0771077	0	0	0.810873	0	0	1
Q9Z1N5	Q9Z1N5	Spliceosome RNA helicase Ddx39b	Ddx39b	T	172	0.244257	0.866832	-0.0357946	1	0.977567	0.911542	0	0.888666	0.884897
Q9Z1N5	Q9Z1N5	Spliceosome RNA helicase Ddx39b	Ddx39b	Y	13	0.156977	0.804637	0.091094	0	0.877107	1	0.964883	0.895549	0.936191
Q810A7	Q810A7	ATP-dependent RNA helicase DDX42	Ddx42	S	96	0.344045	0.899559	-0.0171103	1	0.964809	0.917834	0.932763	0.951986	0.954331
Q810A7	Q810A7	ATP-dependent RNA helicase DDX42	Ddx42	S	185	0.309614	0.890801	0.0176869	0.959871	0.964527	0.979055	1	0.981091	0.993674
Q569Z5	Q569Z5	Probable ATP-dependent RNA helicase DDX46	Ddx46	S	804	0.297567	0.887255	0.0187065	0.96149	0.944515	1	0.997059	0.968087	0.992241
Q9CWX9	Q9CWX9	Probable ATP-dependent RNA helicase DDX47	Ddx47	S	9	0.830452	0.948135	0.00514415	0.928724	0.980832	1	0.940976	0.964597	0.960776
Q99MJ9	Q99MJ9	ATP-dependent RNA helicase DDX50	Ddx50	S	85	0.197059	0.840827	-0.0864035	0.98889	0.919692	1	0.955674	0.934631	0.616415
Q6P9R1	Q6P9R1	ATP-dependent RNA helicase DDX51	Ddx51	S	432	0.914572	0.951261	-0.00526237	0.847836	0	0.921299	0.54485	0.486827	1
Q6P9R1	Q6P9R1	ATP-dependent RNA helicase DDX51	Ddx51	S	77	0.65676	0.938346	-0.00804281	0.962115	0.986828	0.962618	1	0.95088	0.969044
Q8K4L0	Q8K4L0	ATP-dependent RNA helicase DDX54	Ddx54	S	74	0.554128	0.930135	-0.00919865	0.985604	0.995635	0.996976	1	0.978744	0.9755
Q8K4L0	Q8K4L0	ATP-dependent RNA helicase DDX54	Ddx54	S	774	0.831867	0.948201	-0.00393217	0.970144	1	0.992914	0.979467	0.961849	0.995805
Q6ZPL9	Q6ZPL9	ATP-dependent RNA helicase DDX55	Ddx55	S	544	0.0458726	0.426847	0.0524693	0.866014	0.873652	0.96371	1	0.937895	0.990677
Q6ZPL9	Q6ZPL9	ATP-dependent RNA helicase DDX55	Ddx55	S	600	0.571064	0.931393	-0.0342671	1	0.946193	0	0.79641	0.917661	0.89287
Q9DBN9	Q9DBN9	Probable ATP-dependent RNA helicase DDX59	Ddx59	S	145	0.639316	0.937109	0.0165014	0.871014	0.922132	0.858458	0.924995	0.856934	1
O09005	O09005	Sphingolipid delta(4)-desaturase DES1	Degs1	T	15	0.112003	0.7361	0.069719	0.799025	0.929131	0.912712	0.976654	0.956474	1
Q8K382	Q8K382	DENN domain-containing protein 1A	Dennd1a	S	567	0.527798	0.927562	0.0124126	0.9454	0.958116	0.969678	0.97978	0.946116	1
Q8K382	Q8K382	DENN domain-containing protein 1A	Dennd1a	S	520	0.106082	0.72298	0.0405524	0.903905	0.8756	0.923414	1	0.98033	0.965895
Q8K382	Q8K382	DENN domain-containing protein 1A	Dennd1a	S	592	0.535011	0.928295	0.00966456	0.977883	0.976324	0.988646	1	0.991893	0.992366
Q8K382	Q8K382	DENN domain-containing protein 1A	Dennd1a	T	707	0.0272415	0.21118	-0.0786257	1	0.90723	0.874642	0.924348	0.813635	0.780529
Q3U1T9	Q3U1T9	DENN domain-containing protein 1B	Dennd1b	S	632	0.0161684	0.0705003	-0.0807984	0.754649	0.801238	1	0.92939	0.621195	0.563272
Q8C4S8	Q8C4S8	DENN domain-containing protein 2A	Dennd2a	S	397	0.129301	0.762491	-0.105064	0.998058	0	1	0.959974	0	0
A6H8H2	A6H8H2	DENN domain-containing protein 4C	Dennd4c	S	971	0.94248	0.952803	0.00199205	0.905044	1	0.977871	0.987469	0.958417	0.952621
A6H8H2	A6H8H2	DENN domain-containing protein 4C	Dennd4c	S	1240	0.567946	0.9301	-0.0349822	0.732366	0	1	0.689514	0.672892	0
A6H8H2	A6H8H2	DENN domain-containing protein 4C	Dennd4c	S	1096	0.0897701	0.676574	0.0782837	0.92819	0.772136	0.943074	0.914388	0.966809	1
A6H8H2	A6H8H2	DENN domain-containing protein 4C	Dennd4c	T	973	0.286437	0.883655	-0.108527	1	0.961144	0.900332	0	0.977188	0
Q6PAL8	Q6PAL8	DENN domain-containing protein 5A	Dennd5a	S	193	0.324599	0.894767	0.0252714	0.900716	0.916828	0.934868	0.929993	0.908565	1
Q8BH65	Q8BH65	Protein DENND6A	Dennd6a	S	13	0.420794	0.914027	0.0274494	0.841246	0.924744	0.988899	0.967373	0.872294	1
Q8BH65	Q8BH65	Protein DENND6A	Dennd6a	S	16	0.689496	0.94051	-0.0168951	0.975271	0.849011	0.824962	1	0.863279	0.892282
Q9CQJ6	Q9CQJ6	Density-regulated protein	Denr	S	73	0.872732	0.949916	0.0182736	0	0.904272	0.871237	0	0	1
Q9CQJ6	Q9CQJ6	Density-regulated protein	Denr	T	78	0.627146	0.935848	0.0480604	0.912794	0.838032	0.90881	0	0.921747	1
O70279	O70279	Protein DGCR14	Dgcr14	S	295	0.545822	0.929076	-0.0622846	0.964033	1	0.98261	0	0.989625	0.726885
Q9EQM6	Q9EQM6	Microprocessor complex subunit DGCR8	Dgcr8	S	377	0.304473	0.889269	-0.0222936	0.997182	1	0.96923	0.914233	0.97668	0.944287
Q9EQM6	Q9EQM6	Microprocessor complex subunit DGCR8	Dgcr8	S	95	0.351525	0.901234	-0.017694	0.985761	0.986102	0.991568	1	0.97716	0.922357
Q6P5E8	Q6P5E8	Diacylglycerol kinase theta	Dgkq	S	22	0.87316	0.950026	0.00721356	0.814022	0.920063	0.881772	0.875855	1	0.765896
Q6P5E8	Q6P5E8	Diacylglycerol kinase theta	Dgkq	S	22	0.2654	0.87616	-0.0386032	1	0.835511	0.783722	0.779639	0.843451	0.8267
Q6P5E8	Q6P5E8	Diacylglycerol kinase theta	Dgkq	S	26	0.2654	0.87616	-0.0386032	1	0.835511	0.783722	0.779639	0.843451	0.8267
Q99PU8	Q99PU8	Putative ATP-dependent RNA helicase DHX30	Dhx30	S	249	0.0733034	0.611427	-0.0778148	1	0.802319	0.753112	0.756005	0.750656	0.652697
O70133	O70133	ATP-dependent RNA helicase A	Dhx9	S	136	0.66739	0.939075	-0.0070854	0.981539	1	0.97422	0.998763	0.971309	0.983747
O70566	O70566	Protein diaphanous homolog 2	Diaph2	S	69	0.913706	0.951598	-0.0125752	0.896315	1	0	0.919616	0.932881	0.922114
Q8C9B9	Q8C9B9	Death-inducer obliterator 1	Dido1	S	1726	0.305416	0.889329	0.0290821	0.839816	0.967448	0	0	0.95654	1
Q8C9B9	Q8C9B9	Death-inducer obliterator 1	Dido1	S	1840	0.00485563	0.00179974	-0.138504	0.969686	1	0	0	0	0
Q8C9B9	Q8C9B9	Death-inducer obliterator 1	Dido1	T	1252	0.834225	0.947843	-0.0227955	0.935388	0	0.915892	1	0.675427	0.626901
Q8C9B9	Q8C9B9	Death-inducer obliterator 1	Dido1	S	8	0.346024	0.899947	0.0260559	0.863005	0.961136	0.923967	1	0.952383	0.986403
Q8C9B9	Q8C9B9	Death-inducer obliterator 1	Dido1	S	1035	0.850036	0.948715	0.0162487	1	0	0	0	0.827877	0.765763
Q8C9B9	Q8C9B9	Death-inducer obliterator 1	Dido1	S	802	0.134082	0.77743	0.129567	0.847483	0	0.711602	0.932762	1	0.898805
Q8C9B9	Q8C9B9	Death-inducer obliterator 1	Dido1	S	806	0.0542103	0.496951	0.0669015	0.847483	0.781873	0.909313	0.932762	1	0.898805
Q8C9B9	Q8C9B9	Death-inducer obliterator 1	Dido1	S	1256	0.53165	0.927963	0.0108174	0.978163	0.973985	0.963457	0.997556	1	0.988798
Q8C9B9	Q8C9B9	Death-inducer obliterator 1	Dido1	T	1251	0.837929	0.948128	-0.0221168	0.935388	0	0.965817	1	0.675427	0.626901
Q3UH60	Q3UH60	Disco-interacting protein 2 homolog B	Dip2b	S	99	0.175867	0.824507	-0.122274	0.870445	0.967279	1	0.928464	0.879418	0
Q3UH60	Q3UH60	Disco-interacting protein 2 homolog B	Dip2b	T	103	0.259064	0.871106	-0.0931447	0	0.975578	0	1	0	0
Q8CI75	Q8CI75	DIS3-like exonuclease 2	Dis3l2	S	864	0.878276	0.950247	0.002911	0.966646	0.97486	0.968276	0.972623	0.950636	1
Q80Y83	Q80Y83	Dixin	Dixdc1	S	212	0.0415451	0.383668	-0.0695116	1	0.911577	0.887388	0.851316	0.842205	0.833112
Q9ESX5	Q9ESX5	H/ACA ribonucleoprotein complex subunit 4	Dkc1	S	481	0.249596	0.869805	-0.118354	0.971945	0.979804	0.990608	1	0.989292	0.601734
Q9ESX5	Q9ESX5	H/ACA ribonucleoprotein complex subunit 4	Dkc1	S	508	0.804055	0.946881	-0.00417855	0.972501	1	0.991015	0.982781	0.97344	0.98643
Q9ESX5	Q9ESX5	H/ACA ribonucleoprotein complex subunit 4	Dkc1	S	451	0.0924837	0.685252	0.0816136	0.94211	0.766456	0.967194	0.956425	0.992104	1
Q9ESX5	Q9ESX5	H/ACA ribonucleoprotein complex subunit 4	Dkc1	S	453	0.162733	0.811697	0.0666296	0.94211	0.766456	0.967194	0.956425	0.940047	1
Q9ESX5	Q9ESX5	H/ACA ribonucleoprotein complex subunit 4	Dkc1	S	455	0.000576566	3.37507e-10	0.219942	0	0	0	0	0.966313	1
Q811D0;Q91XM9	Q811D0	Disks large homolog 1;Disks large homolog 2	Dlg1;Dlg2	S	301;175	0.978529	0.954122	-0.00121012	0.762654	1	0.871474	0.851183	0.922949	0.834409
Q811D0	Q811D0	Disks large homolog 1	Dlg1	S	573	0.628188	0.936295	0.0137984	0.967082	0.872967	0.880206	1	0.964344	0.941084
Q811D0	Q811D0	Disks large homolog 1	Dlg1	S	575	0.0975582	0.700565	0.0502971	0.856097	0.831603	0.742112	0.767323	0.892737	1
Q811D0	Q811D0	Disks large homolog 1	Dlg1	S	619	0.115775	0.74384	0.108415	0	0.830063	0	0	0.845586	1
E9Q9R9	E9Q9R9	NA	Dlg5	S	132	0.693977	0.940533	-0.0269507	0.975415	0.999187	0.968366	0	0.850057	1
B1AZP2	B1AZP2	Disks large-associated protein 4	Dlgap4	S	665	0.0111341	0.0274457	-0.115392	1	0.973883	0.872569	0.850418	0.759267	0
B1AZP2	B1AZP2	Disks large-associated protein 4	Dlgap4	S	666	0.0116427	0.0304764	-0.116407	1	0.973883	0.872569	0.850418	0.759267	0
B1AZP2	B1AZP2	Disks large-associated protein 4	Dlgap4	S	973	0.254499	0.871961	-0.0204727	1	0.995175	0.896684	0.922735	0.97138	0.949327
B1AZP2	B1AZP2	Disks large-associated protein 4	Dlgap4	S	716	0.183792	0.830987	0.0458652	0.765922	0.95015	0.930215	0.831469	0.979161	1
B1AZP2	B1AZP2	Disks large-associated protein 4	Dlgap4	S	742	0.021658	0.133013	0.211709	0	0	0	0.767004	1	0.854506
B1AZP2	B1AZP2	Disks large-associated protein 4	Dlgap4	S	744	0.163565	0.812176	-0.137736	1	0.980327	0.849897	0.944896	0	0.944357
B1AZP2	B1AZP2	Disks large-associated protein 4	Dlgap4	T	915	0.0100985	0.0208308	-0.102669	1	0.981232	0.818773	0.917887	0.782082	0.803022
Q8K4R9	Q8K4R9	Disks large-associated protein 5	Dlgap5	S	70	0.329263	0.895981	-0.0207585	1	0.966784	0.823105	0.828941	0.973894	0.924019
Q8K4R9	Q8K4R9	Disks large-associated protein 5	Dlgap5	S	328	0.31769	0.892924	0.0311752	0.989071	0.881712	0.981158	0.996317	0.972331	1
Q09163	Q09163	Protein delta homolog 1;Fetal antigen 1	Dlk1	S	357	0.360635	0.903036	0.0651905	0.956822	0	1	0.852901	0.855774	0.99686
Q6PNC0	Q6PNC0	DmX-like protein 1	Dmxl1	S	916	0.648301	0.937749	-0.017567	1	0.981156	0.974251	0.797101	0.970322	0.944749
P63037	P63037	DnaJ homolog subfamily A member 1	Dnaja1	S	335	0.711089	0.941845	-0.01255	0.927447	0.99766	0.876064	1	0.879364	0.990663
P54103	P54103	DnaJ homolog subfamily C member 2;DnaJ homolog subfamily C member 2, N-terminally processed	Dnajc2	S	183	0.902476	0.951242	-0.00360356	0.905695	0.976479	0.92918	0.958286	0.866136	1
E9Q8D0	E9Q8D0	NA	Dnajc21	S	283	0.926388	0.952189	-0.00205771	0.955129	0.989909	0.974124	0.91661	0.936624	1
P60904	P60904	DnaJ homolog subfamily C member 5	Dnajc5	S	10	0.755265	0.94437	-0.00574992	0.985944	0.998036	0.985885	0.972841	1	0.970269
P39053	P39053	Dynamin-1	Dnm1	S	777	0.000329692	2.72381e-13	-0.22046	0.973973	1	0	0	0	0.516525
P39053	P39053	Dynamin-1	Dnm1	T	776	0.95752	0.953362	-0.00275077	0.848747	0.93676	0.975376	0.760128	1	0.772282
P39053	P39053	Dynamin-1	Dnm1	S	774	0.0142942	0.0524756	0.0671042	0.861245	0.870229	0.840348	0.885423	1	0.983368
P39053	P39053	Dynamin-1	Dnm1	S	778	0.658147	0.938362	-0.049003	0.86047	0.884374	0.869434	0	1	0.554533
P39053	P39053	Dynamin-1	Dnm1	T	776	0.372284	0.903161	0.122127	0	0	0	0.897118	0	1
P39054	P39054	Dynamin-2	Dnm2	S	764	0.868005	0.949806	-0.0053343	1	0.927734	0.912533	0.983243	0.937321	0.975559
P39054	P39054	Dynamin-2	Dnm2	T	760	0.324612	0.894126	-0.176961	0.933199	0	0	1	0	0
P13864	P13864	DNA (cytosine-5)-methyltransferase 1	Dnmt1	S	122	0.35016	0.899977	0.0887775	0	0.616568	0	0	0	1
P13864	P13864	DNA (cytosine-5)-methyltransferase 1	Dnmt1	S	125	0.357272	0.901724	0.0882963	0	0.616568	0	0	0	1
P13864	P13864	DNA (cytosine-5)-methyltransferase 1	Dnmt1	S	140	0.954059	0.953235	0.00164654	0.934024	0.901261	1	0.942476	0.985507	0.856917
P13864	P13864	DNA (cytosine-5)-methyltransferase 1	Dnmt1	T	308	0.563331	0.930966	0.0172173	0.861906	0.971987	0.936802	0.959446	0.90713	1
Q8R2M2	Q8R2M2	Deoxynucleotidyltransferase terminal-interacting protein 2	Dnttip2	S	476	0.341602	0.894796	0.0675185	0	0	1	0.614202	0.700679	0.779915
Q8R2M2	Q8R2M2	Deoxynucleotidyltransferase terminal-interacting protein 2	Dnttip2	S	255	0.744375	0.943146	-0.0211055	0	1	0.88093	0.924328	0	0.923143
Q8R2M2	Q8R2M2	Deoxynucleotidyltransferase terminal-interacting protein 2	Dnttip2	S	133	0.0743379	0.616386	-0.237451	0.951146	1	0.828806	0.743731	0.816477	0
Q8R2M2	Q8R2M2	Deoxynucleotidyltransferase terminal-interacting protein 2	Dnttip2	S	137	0.39845	0.910344	0.115968	0.924084	0	0	0.975505	1	0.864454
A2AF47	A2AF47	Dedicator of cytokinesis protein 11	Dock11	S	1237	0.000334237	2.38517e-13	0.247803	0	0	0	0	0.987661	1
A2AF47	A2AF47	Dedicator of cytokinesis protein 11	Dock11	S	1240	0.000532473	8.14306e-11	0.267153	0	0	0	0	0.912842	1
B2RY04	B2RY04	Dedicator of cytokinesis protein 5	Dock5	S	1656	0.00888677	0.0139642	-0.102763	0	1	0.980523	0.924562	0.680047	0.546458
B2RY04	B2RY04	Dedicator of cytokinesis protein 5	Dock5	S	1788	0.692525	0.940702	-0.0124027	0.89681	1	0.87863	0.817451	0.898199	0.954512
B2RY04	B2RY04	Dedicator of cytokinesis protein 5	Dock5	S	1832	0.0959533	0.696431	-0.0365777	0.739757	0.717498	1	0.991363	0.680739	0.629022
B2RY04	B2RY04	Dedicator of cytokinesis protein 5	Dock5	S	1765	0.967768	0.953738	-0.000609607	0.926146	0.926098	0.995668	1	0.929148	0.921076
Q8R1A4	Q8R1A4	Dedicator of cytokinesis protein 7	Dock7	S	945	0.384213	0.906923	0.0852792	0	0	0	0.918301	0	1
Q8R1A4	Q8R1A4	Dedicator of cytokinesis protein 7	Dock7	S	1422	0.555578	0.930268	0.00946604	0.981149	0.985165	0.970729	0.989165	0.994621	1
Q8R1A4	Q8R1A4	Dedicator of cytokinesis protein 7	Dock7	S	896	0.0786052	0.626352	0.143398	0	0.774679	0	0.836131	1	0.953466
Q8R1A4	Q8R1A4	Dedicator of cytokinesis protein 7	Dock7	S	898	0.300456	0.886822	0.0898255	0	0.774679	0	0.836131	1	0.719628
Q8R1A4	Q8R1A4	Dedicator of cytokinesis protein 7	Dock7	S	900	0.301422	0.888273	0.0559591	0.970492	0.756747	0.987083	0.985226	0.920629	1
Q8R1A4	Q8R1A4	Dedicator of cytokinesis protein 7	Dock7	S	894	0.932579	0.952169	0.0116781	0	0.887182	0	0	1	0
Q8R1A4	Q8R1A4	Dedicator of cytokinesis protein 7	Dock7	S	862	0.887715	0.950005	-0.0262731	1	0	0	0	0.989632	0
Q8R1A4	Q8R1A4	Dedicator of cytokinesis protein 7	Dock7	S	864	0.733689	0.94317	0.00646395	0.97458	0.971815	0.856247	0.890427	0.966173	1
Q8R1A4	Q8R1A4	Dedicator of cytokinesis protein 7	Dock7	S	1382	0.636135	0.935931	0.0250511	1	0	0.911113	0.856112	0.901867	0.875331
Q8R1A4	Q8R1A4	Dedicator of cytokinesis protein 7	Dock7	S	963	0.898163	0.950588	0.00545132	0.857322	0	0.943723	0.98459	1	0
Q8R1A4	Q8R1A4	Dedicator of cytokinesis protein 7	Dock7	S	898	0.578958	0.931865	0.0421786	0.871057	0.958184	0	0.803238	1	0.98328
Q8R1A4	Q8R1A4	Dedicator of cytokinesis protein 7	Dock7	S	900	0.790397	0.946435	-0.0257257	0.922464	0	1	0.960194	0	0.848256
Q8R1A4	Q8R1A4	Dedicator of cytokinesis protein 7	Dock7	S	180	0.905011	0.951348	0.00202399	0.955984	0.964145	1	0.990279	0.945239	0.982113
Q8R1A4	Q8R1A4	Dedicator of cytokinesis protein 7	Dock7	S	182	0.654052	0.938156	0.0103715	0.927427	0.973799	0.913344	0.964448	0.941023	1
P97465	P97465	Docking protein 1	Dok1	S	290	0.370574	0.904673	-0.0583675	0.801227	0	0.855683	1	0.657381	0
P97465	P97465	Docking protein 1	Dok1	S	269	0.836894	0.948451	0.022918	0.95993	0.923051	0.878578	0	1	0.95521
P97465	P97465	Docking protein 1	Dok1	T	267	0.839454	0.948426	-0.0349627	0.937275	0	1	0	0.908442	0
P97465	P97465	Docking protein 1	Dok1	Y	376	0.359667	0.901359	0.048971	0.800174	0	0.765071	0.921678	0.725723	1
P97465	P97465	Docking protein 1	Dok1	Y	408	0.200973	0.843701	-0.0350818	0.919718	1	0.802015	0.79336	0.924204	0.860334
P97465	P97465	Docking protein 1	Dok1	Y	361	0.799106	0.946638	0.00680056	0.959968	0.999868	0.960066	0.87305	1	0.981813
Q8BL99	Q8BL99	Protein dopey-1	Dopey1	S	1139	0.493246	0.923808	0.0127789	0.989649	0.928531	0.882347	0.868476	0.978828	1
Q8BL99	Q8BL99	Protein dopey-1	Dopey1	S	1140	0.958078	0.953383	0.00329087	1	0.753964	0.586919	0.87756	0.944884	0.824862
A6X919	A6X919	Probable C-mannosyltransferase DPY19L1	Dpy19l1	S	22	0.653866	0.938148	0.00788619	0.975852	0.971578	0.972478	1	0.977198	0.990332
A6X919	A6X919	Probable C-mannosyltransferase DPY19L1	Dpy19l1	S	23	0.653866	0.938148	0.00788619	0.975852	0.971578	0.972478	1	0.977198	0.990332
O08553	O08553	Dihydropyrimidinase-related protein 2	Dpysl2	S	537	0.788817	0.945608	-0.0183245	0.985364	0	0	0	1	0
O08553	O08553	Dihydropyrimidinase-related protein 2	Dpysl2	S	542	0.153569	0.801681	-0.0683305	0.866867	0.773585	1	0.817212	0.704594	0.668995
O08553	O08553	Dihydropyrimidinase-related protein 2	Dpysl2	T	509	0.190937	0.836608	-0.0223987	0.988741	1	0.956043	0.960257	0.962593	0.962205
Q62188	Q62188	Dihydropyrimidinase-related protein 3	Dpysl3	S	522	0.749321	0.944046	0.0064098	0.961732	0.973733	0.948783	0.967129	0.953669	1
Q62188	Q62188	Dihydropyrimidinase-related protein 3	Dpysl3	T	508	0.502082	0.925175	-0.0440655	1	0	0	0	0	0.819175
Q62188	Q62188	Dihydropyrimidinase-related protein 3	Dpysl3	T	509	0.0485228	0.451087	-0.0469343	0.999417	1	0.933989	0.900366	0.910881	0.939832
Q91ZU6	Q91ZU6	Dystonin	Dst	S	2717	0.624449	0.93562	-0.0441233	0.78669	0.799313	1	0	0.886552	0
Q91ZU6	Q91ZU6	Dystonin	Dst	S	3065	0.163122	0.813699	0.0890413	0	0	1	0.712737	0.714139	0.70423
Q91ZU6	Q91ZU6	Dystonin	Dst	S	7336	0.25984	0.870645	-0.127411	0.865441	0.907974	1	0	0	0.765674
Q91ZU6	Q91ZU6	Dystonin	Dst	T	2521	0.00237712	4.39008e-05	-0.177436	0.976171	1	0.894764	0.771477	0	0
Q91ZU6	Q91ZU6	Dystonin	Dst	T	2857	0.41534	0.9139	-0.0309678	0	0	0.873542	1	0	0
Q91ZU6	Q91ZU6	Dystonin	Dst	S	7333	0.175812	0.824356	0.0378204	0.875492	0.941621	0.936845	0.94071	1	0.941413
Q91ZU6	Q91ZU6	Dystonin	Dst	S	7336	0.175812	0.824356	0.0378204	0.875492	0.941621	0.936845	0.94071	1	0.941413
Q91ZU6	Q91ZU6	Dystonin	Dst	S	4378	0.231593	0.857732	-0.0449442	0.785312	0	0	1	0.640681	0
Q91ZU6	Q91ZU6	Dystonin	Dst	S	237	0.245508	0.868011	0.046464	0.811221	0.958594	0.990828	1	0.953964	0.966539
Q91ZU6	Q91ZU6	Dystonin	Dst	S	1970	0.895221	0.950809	-0.00790245	0.929033	1	0	0.829683	0.989732	0.906443
Q91ZU6	Q91ZU6	Dystonin	Dst	S	2862	0.754271	0.944299	-0.0342648	1	0.995533	0.920258	0	0.906661	0.973034
Q91ZU6	Q91ZU6	Dystonin	Dst	S	3894	0.51222	0.925272	0.0747753	0.717593	0.912375	0	1	0.99004	0.923198
Q91ZU6	Q91ZU6	Dystonin	Dst	S	3896	0.410412	0.911501	0.0747753	0.724812	0.921553	0	0.872988	1	0.932485
Q91ZU6	Q91ZU6	Dystonin	Dst	S	7333	0.593178	0.933561	0.00851653	0.983607	0.979364	0.990629	0.977734	1	0.987668
Q9R0P5	Q9R0P5	Destrin	Dstn	S	3	0.468746	0.920809	0.0184958	0.999119	0.945788	0.994315	0.995963	0.98338	1
Q9DD18	Q9DD18	D-tyrosyl-tRNA(Tyr) deacylase 1	Dtd1	S	196	0.941936	0.952519	0.0127958	0.950126	0	0	0.992145	0	1
Q9DD18	Q9DD18	D-tyrosyl-tRNA(Tyr) deacylase 1	Dtd1	S	197	0.128907	0.770053	0.201929	0	0	0	0	1	0.505514
Q9DD18	Q9DD18	D-tyrosyl-tRNA(Tyr) deacylase 1	Dtd1	S	205	0.233445	0.862301	0.0279173	0.904722	0.895457	0.890075	0.948942	0.926857	1
Q3UIR3	Q3UIR3	E3 ubiquitin-protein ligase DTX3L	Dtx3l	S	9	0.830863	0.948155	-0.00343758	0.995808	0.998037	0.980007	1	0.987236	0.996987
Q3UIR3	Q3UIR3	E3 ubiquitin-protein ligase DTX3L	Dtx3l	S	4	0.908812	0.951496	0.00856045	0.97567	0.704211	0.89192	0.959981	0.714058	1
Q3UIR3	Q3UIR3	E3 ubiquitin-protein ligase DTX3L	Dtx3l	S	9	0.908812	0.951496	0.00856045	0.97567	0.704211	0.89192	0.959981	0.714058	1
Q9DBB1;Q91Z46	Q9DBB1	Dual specificity protein phosphatase 6;Dual specificity protein phosphatase 7	Dusp6;Dusp7	S	328;369	0.413299	0.912825	0.0347171	0.939223	0.73092	1	0.839843	0.966765	0.887629
Q9DBB1;Q91Z46	Q9DBB1	Dual specificity protein phosphatase 6;Dual specificity protein phosphatase 7	Dusp6;Dusp7	S	331;372	0.143531	0.78973	0.0322444	0.96569	0.911428	0.96708	0.992195	1	0.996346
Q60838	Q60838	Segment polarity protein dishevelled homolog DVL-2	Dvl2	S	211	0.519613	0.927087	-0.072089	1	0	0	0	0.817219	0
Q61062	Q61062	Segment polarity protein dishevelled homolog DVL-3	Dvl3	S	125	0.335215	0.898227	0.128481	0.997352	0	0.873007	0	1	0.968048
Q9JHU4	Q9JHU4	Cytoplasmic dynein 1 heavy chain 1	Dync1h1	S	4366	0.115319	0.743209	-0.043841	0.991437	0.972537	0.920229	1	0.911582	0.907505
O88487	O88487	Cytoplasmic dynein 1 intermediate chain 2	Dync1i2	S	51	0.773327	0.945332	-0.00449659	1	0.993672	0.968582	0.979128	0.976269	0.997928
O88487	O88487	Cytoplasmic dynein 1 intermediate chain 2	Dync1i2	S	81	0.092201	0.684453	0.0673365	0.794659	0.876534	0.98892	1	0.892075	0.972402
O88487	O88487	Cytoplasmic dynein 1 intermediate chain 2	Dync1i2	S	95	0.743462	0.943321	-0.00693318	0.876462	0	0	0	1	0
Q8R1Q8	Q8R1Q8	Cytoplasmic dynein 1 light intermediate chain 1	Dync1li1	S	207	0.224177	0.857526	-0.0257219	0.802151	0.742662	0.978813	1	0.72895	0.714388
Q8R1Q8	Q8R1Q8	Cytoplasmic dynein 1 light intermediate chain 1	Dync1li1	S	510	0.445437	0.917713	0.0151703	0.952348	0.996323	0.983161	0.984701	0.990435	1
Q8R1Q8	Q8R1Q8	Cytoplasmic dynein 1 light intermediate chain 1	Dync1li1	S	516	0.902079	0.95123	0.0019237	0.985963	0.996533	0.994527	0.999276	0.98773	1
Q8R1Q8	Q8R1Q8	Cytoplasmic dynein 1 light intermediate chain 1	Dync1li1	S	510	0.222806	0.856795	0.0263172	0.955174	0.948747	0.973819	0.917681	0.991239	1
Q8R1Q8	Q8R1Q8	Cytoplasmic dynein 1 light intermediate chain 1	Dync1li1	S	516	0.168639	0.817764	0.0392511	0.965805	0.877525	0.969592	0.957325	0.975011	1
Q8R1Q8	Q8R1Q8	Cytoplasmic dynein 1 light intermediate chain 1	Dync1li1	T	513	0.335128	0.897341	0.0579294	0.79055	0.833623	0.67767	0.952969	0.864606	1
Q8R1Q8	Q8R1Q8	Cytoplasmic dynein 1 light intermediate chain 1	Dync1li1	T	515	0.161285	0.809173	-0.0720045	0.94833	1	0.812922	0	0.905432	0.684401
Q6PDL0	Q6PDL0	Cytoplasmic dynein 1 light intermediate chain 2	Dync1li2	S	194	0.953878	0.95323	0.000930598	0.992228	0.992194	0.973113	1	0.99233	0.995185
Q6PDL0	Q6PDL0	Cytoplasmic dynein 1 light intermediate chain 2	Dync1li2	S	407	0.164171	0.81023	-0.0991551	1	0	0.988326	0.920231	0	0
Q9Z188;Q61214	Q9Z188	Dual specificity tyrosine-phosphorylation-regulated kinase 1B;Dual specificity tyrosine-phosphorylation-regulated kinase 1A	Dyrk1b;Dyrk1a	Y	271;319	0.336932	0.896568	0.173444	0	0	0	0.85365	0	1
Q9Z188;Q61214	Q9Z188	Dual specificity tyrosine-phosphorylation-regulated kinase 1B;Dual specificity tyrosine-phosphorylation-regulated kinase 1A	Dyrk1b;Dyrk1a	Y	273;321	0.453461	0.918833	-0.0131866	0.996144	1	0.997013	0.990576	0.994387	0.963734
O35261	O35261	Transcription factor E2F3	E2f3	S	158	0.906535	0.951393	-0.0121384	1	0.977732	0.966924	0	0.951828	0.982235
Q9D0V7	Q9D0V7	Receptor-binding cancer antigen expressed on SiSo cells	Ebag9	S	36	0.950223	0.953095	-0.000936335	0.9993	0.997614	1	0.998709	0.99911	0.995237
Q8K2D3	Q8K2D3	Enhancer of mRNA-decapping protein 3	Edc3	S	131	0.0163868	0.0769767	0.101613	0	0	0	0	1	0.900883
Q3UJB9	Q3UJB9	Enhancer of mRNA-decapping protein 4	Edc4	S	3	0.95061	0.953021	0.00285188	1	0.815014	0.872153	0	0.963184	0.866437
Q3UJB9	Q3UJB9	Enhancer of mRNA-decapping protein 4	Edc4	S	6	0.868633	0.949834	0.00487399	0.919028	0.979962	0.951342	0.953794	1	0.913818
Q3UJB9	Q3UJB9	Enhancer of mRNA-decapping protein 4	Edc4	S	880	0.291914	0.885244	-0.144753	0.98494	0.804214	1	0	0	0.790005
Q3UJB9	Q3UJB9	Enhancer of mRNA-decapping protein 4	Edc4	S	884	0.296376	0.886741	-0.0518007	1	0.996582	0.863021	0.989149	0.866739	0.981842
Q3UJB9	Q3UJB9	Enhancer of mRNA-decapping protein 4	Edc4	S	727	0.989606	0.954513	0.000203003	0.993206	0.97707	1	0.998403	0.985479	0.985344
Q3UJB9	Q3UJB9	Enhancer of mRNA-decapping protein 4	Edc4	S	486	0.500117	0.924087	0.0159808	0.946374	0.934719	0	0	1	0.938946
Q3UJB9	Q3UJB9	Enhancer of mRNA-decapping protein 4	Edc4	S	733	0.507933	0.925462	-0.0125709	0.945811	0.93171	0.94774	1	0.921839	0.908317
Q3UJB9	Q3UJB9	Enhancer of mRNA-decapping protein 4	Edc4	T	731	0.557761	0.930443	-0.0347168	0.905211	0.949816	0.951915	1	0.787601	0.976731
Q9JMG1	Q9JMG1	Endothelial differentiation-related factor 1	Edf1	S	4	0.701634	0.941269	0.016265	0.806564	0.821327	1	0.891535	0.979643	0.730475
O70251	O70251	Elongation factor 1-beta	Eef1b	S	106	0.966322	0.953685	-0.000642882	0.991638	0.998931	0.972946	0.973957	0.988322	1
P57776	P57776	Elongation factor 1-delta	Eef1d	S	133	0.555852	0.930295	0.010265	0.946404	0.967423	0.996046	1	0.959679	0.983568
P57776	P57776	Elongation factor 1-delta	Eef1d	S	162	0.062708	0.554111	-0.0956067	0.995879	1	0.927811	0.974422	0.946805	0.851641
P57776	P57776	Elongation factor 1-delta	Eef1d	S	118	0.0105087	0.0219241	-0.245155	0.792482	0.964518	1	0.786825	0	0
P57776	P57776	Elongation factor 1-delta	Eef1d	S	119	0.0730363	0.610795	-0.0507407	1	0.956268	0.918752	0.957739	0.9183	0.863652
Q9D8N0	Q9D8N0	Elongation factor 1-gamma	Eef1g	S	33	0.477836	0.921946	-0.0183945	1	0.956942	0.938861	0.990333	0.989724	0.88323
Q9D8N0	Q9D8N0	Elongation factor 1-gamma	Eef1g	T	46	0.019416	0.101545	-0.213156	0.93494	1	0.8959	0	0	0
P58252	P58252	Elongation factor 2	Eef2	S	502	0.0465311	0.427516	-0.100062	1	0.880163	0.814148	0.790101	0	0.796601
P58252	P58252	Elongation factor 2	Eef2	T	57	0.960695	0.953479	-0.00167252	0.98184	1	0.861225	0.976936	0.977625	0.999439
O08796	O08796	Eukaryotic elongation factor 2 kinase	Eef2k	S	444	0.048272	0.448676	0.0517247	0.865988	0.919381	0.658436	0.686751	1	0.973996
Q8VDY4	Q8VDY4	EF-hand calcium-binding domain-containing protein 7	Efcab7	S	19	0.69132	0.939492	0.0101316	0.862928	0	0.881728	1	0.869421	0.762348
Q8CDU5	Q8CDU5	EF-hand domain-containing family member B	Efhb	T	342	0.606145	0.933967	-0.0609773	0	1	0.879488	0.858838	0	0.787895
Q8CDU5	Q8CDU5	EF-hand domain-containing family member B	Efhb	Y	329	0.612454	0.934201	-0.0607647	0	1	0.879488	0.858838	0	0.787895
Q8CDU5	Q8CDU5	EF-hand domain-containing family member B	Efhb	Y	340	0.61988	0.93557	-0.0595963	0	1	0.879488	0.858838	0	0.787895
Q9D8Y0	Q9D8Y0	EF-hand domain-containing protein D2	Efhd2	S	74	0.524001	0.927178	-0.0115687	0.996841	1	0.900618	0.861815	0.992741	0.956472
Q8BG67	Q8BG67	Protein EFR3 homolog A	Efr3a	S	692	0.554971	0.930184	0.0343931	0.784535	0.846142	1	0.744545	0.90213	0.850895
Q01279	Q01279	Epidermal growth factor receptor	Egfr	S	1166	0.625284	0.935965	-0.0467906	1	0.953376	0.996453	0	0.888037	0.882203
Q01279	Q01279	Epidermal growth factor receptor	Egfr	T	695	0.35504	0.901957	0.0240001	0.910376	0.834865	0.997361	1	0.900754	0.913575
Q91YE3	Q91YE3	Egl nine homolog 1	Egln1	S	131	0.611356	0.935121	0.0800559	0	0	0	1	0.798581	0
Q69ZW3	Q69ZW3	EH domain-binding protein 1	Ehbp1	S	335	0.00487777	0.00158564	-0.180829	1	0.864715	0	0	0	0
Q69ZW3	Q69ZW3	EH domain-binding protein 1	Ehbp1	S	1038	0.0256769	0.181356	0.0830062	0	0	0	0	0.925947	1
Q99MS7	Q99MS7	EH domain-binding protein 1-like protein 1	Ehbp1l1	S	284	0.662115	0.938715	0.0076941	0.964692	0.972181	0.992023	0.991056	0.961616	1
Q99MS7	Q99MS7	EH domain-binding protein 1-like protein 1	Ehbp1l1	S	1443	0.192463	0.838253	0.122202	0.852743	0	1	0.711588	0.928877	0.920141
Q99MS7	Q99MS7	EH domain-binding protein 1-like protein 1	Ehbp1l1	S	1444	0.192981	0.838679	0.12138	0.852743	0	1	0.711588	0.928877	0.920141
Q9WVK4	Q9WVK4	EH domain-containing protein 1	Ehd1	S	456	0.253707	0.869867	0.100928	0.919146	0	0	0.826735	1	0.914479
Q8BH64	Q8BH64	EH domain-containing protein 2	Ehd2	S	438	0.522221	0.926992	-0.011659	0.977075	1	0.972192	0.952178	0.978523	0.970476
Q8BH64	Q8BH64	EH domain-containing protein 2	Ehd2	S	470	0.464621	0.921304	-0.0358187	1	0.785069	0	0	0.881111	0.753699
Q5DW34	Q5DW34	Histone-lysine N-methyltransferase EHMT1	Ehmt1	S	81	0.0782515	0.635539	0.12506	0.83816	0	0.986226	0.895968	0.910491	1
Q9Z148	Q9Z148	Histone-lysine N-methyltransferase EHMT2	Ehmt2	T	608	0.31309	0.891631	0.0558935	0.678422	0.891139	0.931104	1	0.848128	0.913075
Q9Z148	Q9Z148	Histone-lysine N-methyltransferase EHMT2	Ehmt2	T	613	0.0216449	0.131921	0.198846	0.678422	0	0.931104	1	0.848128	0.951318
Q03963	Q03963	Interferon-induced, double-stranded RNA-activated protein kinase	Eif2ak2	S	32	0.856831	0.949292	-0.0119551	0.955691	0.980297	0.18557	0	1	0.886345
Q03963	Q03963	Interferon-induced, double-stranded RNA-activated protein kinase	Eif2ak2	S	240	0.507694	0.925415	0.0173628	0.931536	0.798475	0.902301	1	0.907956	0.924032
Q03963	Q03963	Interferon-induced, double-stranded RNA-activated protein kinase	Eif2ak2	S	110	0.425893	0.91282	0.0572395	0.897848	0.84219	0.808984	0	1	0.953538
Q03963	Q03963	Interferon-induced, double-stranded RNA-activated protein kinase	Eif2ak2	S	223	0.0175943	0.0858186	0.110483	0.84991	0.701488	0.879375	0.897548	0.99606	1
Q9QZ05	Q9QZ05	Eukaryotic translation initiation factor 2-alpha kinase 4	Eif2ak4	S	550	0.0103362	0.0223159	0.0752827	0.813552	0.827108	0.995777	0.948139	0.96513	1
Q9QZ05	Q9QZ05	Eukaryotic translation initiation factor 2-alpha kinase 4	Eif2ak4	S	554	0.0312014	0.255333	-0.213216	0.941564	1	0	0.927439	0	0
Q8CHW4	Q8CHW4	Translation initiation factor eIF-2B subunit epsilon	Eif2b5	S	540	0.766233	0.944959	-0.0047987	0.979202	1	0.987698	0.981745	0.983164	0.98305
Q6ZWX6	Q6ZWX6	Eukaryotic translation initiation factor 2 subunit 1	Eif2s1	S	158	0.852649	0.948427	-0.0061139	0.899718	0	1	0	0	0.887252
Q6ZWX6	Q6ZWX6	Eukaryotic translation initiation factor 2 subunit 1	Eif2s1	T	279	0.0422775	0.391509	0.0454505	0.91547	0.880952	0.941044	0.947671	0.978282	1
Q99L45	Q99L45	Eukaryotic translation initiation factor 2 subunit 2	Eif2s2	S	105	0.272521	0.878803	-0.043548	1	0.908989	0.952641	0.808545	0.875843	0.87101
Q99L45	Q99L45	Eukaryotic translation initiation factor 2 subunit 2	Eif2s2	S	67	0.765684	0.94493	0.00463364	0.98815	0.978232	0.979185	0.978968	0.983178	1
Q99L45	Q99L45	Eukaryotic translation initiation factor 2 subunit 2	Eif2s2	S	2	0.153332	0.802008	0.0274061	0.948225	0.957201	0.994516	0.991962	0.975516	1
P23116	P23116	Eukaryotic translation initiation factor 3 subunit A	Eif3a	S	584	0.389503	0.906992	-0.0286591	0	0	1	0.890699	0	0
Q8JZQ9	Q8JZQ9	Eukaryotic translation initiation factor 3 subunit B	Eif3b	S	68	0.672731	0.939425	0.00849694	0.968317	0.974546	0.921068	0.864601	0.972691	1
Q8JZQ9	Q8JZQ9	Eukaryotic translation initiation factor 3 subunit B	Eif3b	S	75	0.428877	0.915264	0.0293292	0.993066	0.89537	0.98838	0.937025	0.965201	1
Q8JZQ9	Q8JZQ9	Eukaryotic translation initiation factor 3 subunit B	Eif3b	T	74	0.381679	0.906636	-0.103094	0.972795	0.993254	0	0.96015	0	1
Q8JZQ9	Q8JZQ9	Eukaryotic translation initiation factor 3 subunit B	Eif3b	S	68	0.791615	0.945036	0.0310561	0.851855	0	0	0.810154	0	1
Q8JZQ9	Q8JZQ9	Eukaryotic translation initiation factor 3 subunit B	Eif3b	S	75	0.853723	0.949184	0.00568606	0.961969	0.95466	0.906686	1	0.969739	0.961393
Q8JZQ9	Q8JZQ9	Eukaryotic translation initiation factor 3 subunit B	Eif3b	S	79	0.344387	0.899627	0.0180828	0.981179	0.972663	0.956953	0.990741	0.999537	1
Q8JZQ9	Q8JZQ9	Eukaryotic translation initiation factor 3 subunit B	Eif3b	S	88	0.861907	0.948638	-0.00610593	0	0.977791	0.977478	1	0	0.968645
Q8JZQ9	Q8JZQ9	Eukaryotic translation initiation factor 3 subunit B	Eif3b	S	143	0.0908883	0.68023	0.0620006	0.858609	0.911937	0.872799	0.985056	0.986866	1
Q8JZQ9	Q8JZQ9	Eukaryotic translation initiation factor 3 subunit B	Eif3b	S	153	0.0908883	0.68023	0.0620006	0.858609	0.911937	0.872799	0.985056	0.986866	1
Q8JZQ9	Q8JZQ9	Eukaryotic translation initiation factor 3 subunit B	Eif3b	T	72	0.927868	0.952106	0.00743287	0.997593	0.967167	0.947083	0	1	0.994035
Q8JZQ9	Q8JZQ9	Eukaryotic translation initiation factor 3 subunit B	Eif3b	T	74	0.441887	0.917155	-0.115683	0.970697	0.94935	1	0.617061	0.99841	0.594919
Q8JZQ9	Q8JZQ9	Eukaryotic translation initiation factor 3 subunit B	Eif3b	S	75	0.663731	0.938815	-0.0669561	0.785118	0.824581	0	0.823486	1	0
Q8JZQ9	Q8JZQ9	Eukaryotic translation initiation factor 3 subunit B	Eif3b	S	79	0.5537	0.930152	0.0521906	0.908699	0.824581	0	0.823486	1	0.917409
Q8JZQ9	Q8JZQ9	Eukaryotic translation initiation factor 3 subunit B	Eif3b	S	84	0.663098	0.938703	-0.0702971	0.785118	0.824581	0	0.823486	1	0
Q8JZQ9	Q8JZQ9	Eukaryotic translation initiation factor 3 subunit B	Eif3b	S	90	0.451589	0.918545	0.0190949	0.876485	0.946025	0.888425	0.910775	0.907503	1
Q8JZQ9	Q8JZQ9	Eukaryotic translation initiation factor 3 subunit B	Eif3b	S	141	0.807285	0.947038	-0.00580806	1	0.960267	0.960027	0.993343	0.949195	0.995123
Q8JZQ9	Q8JZQ9	Eukaryotic translation initiation factor 3 subunit B	Eif3b	S	143	0.767234	0.945011	0.00619264	0.993346	0.953383	0.953171	0.99755	0.967916	1
Q8JZQ9	Q8JZQ9	Eukaryotic translation initiation factor 3 subunit B	Eif3b	S	111	0.748577	0.943919	-0.0445209	0.951185	0.607022	1	0.986282	0	0.977528
Q8JZQ9	Q8JZQ9	Eukaryotic translation initiation factor 3 subunit B	Eif3b	S	120	0.524427	0.927188	-0.0234356	0.847316	1	0.887116	0.955353	0.88463	0.87472
Q8R1B4	Q8R1B4	Eukaryotic translation initiation factor 3 subunit C	Eif3c	S	39	0.277284	0.88053	0.0266413	0.913968	0.897414	0.931847	1	0.927821	0.992398
Q9Z1D1	Q9Z1D1	Eukaryotic translation initiation factor 3 subunit G	Eif3g	S	42	0.239845	0.865432	0.235357	0.928694	0	0.84412	1	0.887234	0.959779
Q9Z1D1	Q9Z1D1	Eukaryotic translation initiation factor 3 subunit G	Eif3g	T	41	0.297108	0.885516	-0.256671	1	0	0.955676	0	0	0
Q9Z1D1	Q9Z1D1	Eukaryotic translation initiation factor 3 subunit G	Eif3g	S	42	0.553619	0.930057	-0.0485596	1	0.867321	0.574715	0.964963	0.771628	0.901087
Q9Z1D1	Q9Z1D1	Eukaryotic translation initiation factor 3 subunit G	Eif3g	T	38	0.553619	0.930057	-0.0485596	1	0.867321	0.574715	0.964963	0.771628	0.901087
Q9Z1D1	Q9Z1D1	Eukaryotic translation initiation factor 3 subunit G	Eif3g	T	41	0.553619	0.930057	-0.0485596	1	0.867321	0.574715	0.964963	0.771628	0.901087
Q3UGC7	Q3UGC7	Eukaryotic translation initiation factor 3 subunit J-A	Eif3j1	S	14	0.0647595	0.567349	-0.0359956	1	0.994108	0.968385	0.956729	0.949253	0.949358
Q3UGC7	Q3UGC7	Eukaryotic translation initiation factor 3 subunit J-A	Eif3j1	S	16	0.00978392	0.0186392	0.210322	0.709706	0	0	0	1	0.979673
Q66JS6	Q66JS6	Eukaryotic translation initiation factor 3 subunit J-B	Eif3j2	S	16	0.715745	0.942125	-0.00741939	0.984011	0.965372	1	0.968563	0.940233	0.985845
Q66JS6	Q66JS6	Eukaryotic translation initiation factor 3 subunit J-B	Eif3j2	S	18	0.19095	0.836347	0.128469	0.716509	0	0.775773	1	0.726082	0.831307
Q91VC3	Q91VC3	Eukaryotic initiation factor 4A-III;Eukaryotic initiation factor 4A-III, N-terminally processed	Eif4a3	S	10	0.794246	0.946062	0.0255336	0.787083	0	0	0	1	0
Q91VC3	Q91VC3	Eukaryotic initiation factor 4A-III;Eukaryotic initiation factor 4A-III, N-terminally processed	Eif4a3	S	12	0.102368	0.713425	-0.102799	0.971183	1	0.93611	0.892385	0.654368	0.916865
Q8BGD9	Q8BGD9	Eukaryotic translation initiation factor 4B	Eif4b	S	207	0.601218	0.934209	0.0108538	0.975973	0.98544	0.928751	0.983761	0.993496	1
Q8BGD9	Q8BGD9	Eukaryotic translation initiation factor 4B	Eif4b	S	406	0.134511	0.777163	-0.0293805	0.981791	1	0.999899	0.98638	0.957181	0.932682
Q8BGD9	Q8BGD9	Eukaryotic translation initiation factor 4B	Eif4b	S	93	0.329523	0.896053	0.0199593	0.936195	0.978351	0.998956	1	0.985643	0.980206
Q8BGD9	Q8BGD9	Eukaryotic translation initiation factor 4B	Eif4b	S	497	0.0579005	0.524035	0.0408214	0.938477	0.920004	0.926781	0.924328	0.976568	1
Q8BGD9	Q8BGD9	Eukaryotic translation initiation factor 4B	Eif4b	T	97	0.0253326	0.184191	-0.132323	0.943748	1	0.932764	0	0	0
Q60876	Q60876	Eukaryotic translation initiation factor 4E-binding protein 1	Eif4ebp1	S	64	0.254555	0.871827	-0.0299227	0.981328	0.992986	1	0.921059	0.932932	0.947514
Q60876	Q60876	Eukaryotic translation initiation factor 4E-binding protein 1	Eif4ebp1	S	2	0.510279	0.925675	0.0704735	0.917974	0.474468	0.990551	0.951092	0.669548	1
Q60876	Q60876	Eukaryotic translation initiation factor 4E-binding protein 1	Eif4ebp1	T	69	0.431794	0.91569	-0.0393493	1	0.996683	0.885022	0.66544	0.928001	0.930531
Q60876	Q60876	Eukaryotic translation initiation factor 4E-binding protein 1	Eif4ebp1	T	45	0.178449	0.826425	-0.0827269	1	0.874745	0.9403	0.966207	0.900421	0.664979
Q60876	Q60876	Eukaryotic translation initiation factor 4E-binding protein 1	Eif4ebp1	T	36	0.98157	0.95423	-0.001088	0.981212	0.979623	0.7971	0.978759	1	0.957517
Q60876	Q60876	Eukaryotic translation initiation factor 4E-binding protein 1	Eif4ebp1	T	45	0.491196	0.923564	0.0137257	0.991517	0.952646	0.979612	0.948314	0.986464	1
Q60876	Q60876	Eukaryotic translation initiation factor 4E-binding protein 1	Eif4ebp1	Y	33	0.369469	0.904958	-0.0243572	1	0.990057	0.993456	0.939058	0.926347	0.991286
P70445	P70445	Eukaryotic translation initiation factor 4E-binding protein 2	Eif4ebp2	T	46	0.419184	0.913774	0.027811	0.872769	0.900207	1	0.886409	0.971611	0.897102
P70445	P70445	Eukaryotic translation initiation factor 4E-binding protein 2	Eif4ebp2	Y	34	0.181554	0.829733	-0.193419	1	0	0.9949	0.780678	0	0
Q9EST3	Q9EST3	Eukaryotic translation initiation factor 4E transporter	Eif4enif1	S	563	0.55892	0.930576	-0.00952429	1	0.994902	0.970133	0.987983	0.990115	0.972781
Q9EST3	Q9EST3	Eukaryotic translation initiation factor 4E transporter	Eif4enif1	S	586	0.0478006	0.444484	-0.0522105	0.999051	1	0.907602	0.9374	0.934806	0.875978
Q6NZJ6	Q6NZJ6	Eukaryotic translation initiation factor 4 gamma 1	Eif4g1	S	1211	0.792631	0.946317	-0.00459074	0.966446	1	0.96284	0.964929	0.966648	0.985278
Q6NZJ6	Q6NZJ6	Eukaryotic translation initiation factor 4 gamma 1	Eif4g1	S	1231	0.554437	0.930166	-0.011437	0.971141	0.98544	0.957461	1	0.965618	0.958159
Q6NZJ6	Q6NZJ6	Eukaryotic translation initiation factor 4 gamma 1	Eif4g1	S	1231	0.933804	0.952476	-0.00136651	1	0.981326	0.978204	0.948273	0.984621	0.991473
Q6NZJ6	Q6NZJ6	Eukaryotic translation initiation factor 4 gamma 1	Eif4g1	S	1187	0.0885924	0.67356	0.0366324	0.916088	0.907335	0.905702	0.958856	0.984353	1
Q6NZJ6	Q6NZJ6	Eukaryotic translation initiation factor 4 gamma 1	Eif4g1	S	1189	0.0885924	0.67356	0.0366324	0.916088	0.907335	0.905702	0.958856	0.984353	1
Q6NZJ6	Q6NZJ6	Eukaryotic translation initiation factor 4 gamma 1	Eif4g1	T	1226	0.933804	0.952476	-0.00136651	1	0.981326	0.978204	0.948273	0.984621	0.991473
Q6NZJ6	Q6NZJ6	Eukaryotic translation initiation factor 4 gamma 1	Eif4g1	S	1081	0.540269	0.928814	-0.0113983	0.986108	1	0.941465	0.893228	0.983057	0.957634
Q6NZJ6	Q6NZJ6	Eukaryotic translation initiation factor 4 gamma 1	Eif4g1	S	1096	0.649467	0.937351	-0.0506037	0.988303	1	0	0.853392	0.995076	0.829841
Q6NZJ6	Q6NZJ6	Eukaryotic translation initiation factor 4 gamma 1	Eif4g1	S	1187	0.0823414	0.654385	-0.162779	0.930577	0.826458	1	0	0	0
Q6NZJ6	Q6NZJ6	Eukaryotic translation initiation factor 4 gamma 1	Eif4g1	S	1189	0.0654864	0.571258	-0.0575919	0.937479	1	0.955664	0.897239	0.829503	0.887244
Q6NZJ6	Q6NZJ6	Eukaryotic translation initiation factor 4 gamma 1	Eif4g1	T	1226	0.424333	0.913922	0.111217	0	0.840485	0	1	0.939374	0.79908
Q62448	Q62448	Eukaryotic translation initiation factor 4 gamma 2	Eif4g2	S	394	0.305298	0.889861	-0.0773767	0	1	0	0	0.733223	0
Q62448	Q62448	Eukaryotic translation initiation factor 4 gamma 2	Eif4g2	T	507	0.444723	0.917646	-0.0119848	1	0.999613	0.988174	0.980169	0.980324	0.983121
Q80XI3	Q80XI3	Eukaryotic translation initiation factor 4 gamma 3	Eif4g3	S	1151	0.664358	0.937775	-0.0466623	0.927101	0	0.86841	1	0.837651	0
Q80XI3	Q80XI3	Eukaryotic translation initiation factor 4 gamma 3	Eif4g3	S	267	0.98499	0.954341	-0.000531595	1	0.895395	0	0	0.929032	0.964399
Q05D44	Q05D44	Eukaryotic translation initiation factor 5B	Eif5b	S	294	0.728278	0.942361	0.0315217	0.949425	0.919691	0.985975	0	1	0.993547
Q05D44	Q05D44	Eukaryotic translation initiation factor 5B	Eif5b	S	1164	0.717541	0.941746	-0.040558	0	1	0	0.928758	0.67965	0.687347
Q05D44	Q05D44	Eukaryotic translation initiation factor 5B	Eif5b	S	108	0.0526195	0.485024	0.037961	0.923177	0.930497	0.920497	0.925449	0.996523	1
Q05D44	Q05D44	Eukaryotic translation initiation factor 5B	Eif5b	S	114	0.0526195	0.485024	0.037961	0.923177	0.930497	0.920497	0.925449	0.996523	1
Q05D44	Q05D44	Eukaryotic translation initiation factor 5B	Eif5b	S	137	0.23555	0.863337	0.0292981	0.901192	0.913144	0.945378	0.932495	0.919421	1
Q05D44	Q05D44	Eukaryotic translation initiation factor 5B	Eif5b	S	139	0.87035	0.949906	-0.00642712	0.993828	0.890586	0.958573	0.915195	0.86142	1
Q05D44	Q05D44	Eukaryotic translation initiation factor 5B	Eif5b	S	108	0.523982	0.927265	-0.06586	0.906469	0.938226	0	0.948965	0	1
Q05D44	Q05D44	Eukaryotic translation initiation factor 5B	Eif5b	S	114	0.858407	0.949395	0.00280243	0.990196	0.987255	0.984019	0.993264	0.985145	1
Q05D44	Q05D44	Eukaryotic translation initiation factor 5B	Eif5b	S	215	0.517317	0.926486	0.0102887	0.987009	0.982048	0.980526	0.989857	0.993124	1
Q05D44	Q05D44	Eukaryotic translation initiation factor 5B	Eif5b	S	187	0.588836	0.932673	0.0430119	0.932369	0.734081	0	0.846206	0.841575	1
Q05D44	Q05D44	Eukaryotic translation initiation factor 5B	Eif5b	T	107	0.652956	0.937212	0.0795174	0	0.733101	0.947233	0.723898	0	1
O55135	O55135	Eukaryotic translation initiation factor 6	Eif6	S	239	0.929659	0.951726	0.0051302	0	0.911056	0	1	0	0.939794
Q80Y81	Q80Y81	Zinc phosphodiesterase ELAC protein 2	Elac2	S	797	0.498187	0.924332	-0.0345244	0.786822	1	0.955272	0.959598	0.737245	0.904636
Q9Z2U4	Q9Z2U4	ETS-related transcription factor Elf-4	Elf4	T	190	0.401472	0.909959	0.118961	0	0	1	0	0	0.966086
O08856	O08856	RNA polymerase II elongation factor ELL	Ell	S	300	0.40791	0.912011	-0.0713302	0.946088	0.903786	0	0.810455	1	0
O08579	O08579	Emerin	Emd	S	141	0.749266	0.942678	-0.0167114	0	0.708879	1	0.77106	0.750183	0
O35130	O35130	Ribosomal RNA small subunit methyltransferase NEP1	Emg1	S	16	0.751686	0.944176	-0.0049518	0.939317	0.951878	0.98701	1	0.939605	0.935998
O35130	O35130	Ribosomal RNA small subunit methyltransferase NEP1	Emg1	S	16	0.196197	0.840265	0.0905092	0.960917	0	0.993266	0.970015	1	0.958049
O35130	O35130	Ribosomal RNA small subunit methyltransferase NEP1	Emg1	T	24	0.123577	0.761646	-0.115789	1	0	0.901914	0.88579	0	0
O35130	O35130	Ribosomal RNA small subunit methyltransferase NEP1	Emg1	T	25	0.000709308	2.34263e-09	0.174632	0	0	0.828885	0.793421	1	0.958049
Q8VC03	Q8VC03	Echinoderm microtubule-associated protein-like 3	Eml3	S	177	0.900438	0.951161	0.00305992	1	0.929891	0.968994	0.895348	0.973236	0.968421
Q8VC03	Q8VC03	Echinoderm microtubule-associated protein-like 3	Eml3	S	178	0.43488	0.913903	0.0805501	0	0	0.744098	0.807264	1	0
Q3UMY5	Q3UMY5	Echinoderm microtubule-associated protein-like 4	Eml4	S	144	0.25917	0.873563	0.145251	0	1	0.946836	0.842813	0.977848	0.977835
Q3UMY5	Q3UMY5	Echinoderm microtubule-associated protein-like 4	Eml4	S	146	0.0879168	0.668289	-0.178435	0.976043	0.873368	0.93411	1	0	0.807179
Q03173	Q03173	Protein enabled homolog	Enah	S	144	0.238078	0.864621	-0.0225848	1	0.981015	0.953394	0.969873	0.96804	0.931422
Q03173	Q03173	Protein enabled homolog	Enah	T	696	0.742789	0.943685	0.00503213	0.984371	0.991987	0.942865	0.93601	0.992484	1
P17182;P17183;P21550	P17182	Alpha-enolase;Gamma-enolase;Beta-enolase	Eno1;Eno2;Eno3	S	40;40;40	0.0251817	0.183998	0.0589844	0.838575	0.887086	0.924091	0.897286	1	0.972783
P17182;P17183;P21550	P17182	Alpha-enolase;Gamma-enolase;Beta-enolase	Eno1;Eno2;Eno3	S	373;373;373	0.792288	0.945593	-0.0155566	1	0	0.806264	0	0.679527	0.911844
P17182;P17183;P21550	P17182	Alpha-enolase;Gamma-enolase;Beta-enolase	Eno1;Eno2;Eno3	T	41;41;41	0.00490388	0.0018197	-0.202166	1	0.922066	0	0.723038	0	0
P17182;P17183;P21550	P17182	Alpha-enolase;Gamma-enolase;Beta-enolase	Eno1;Eno2;Eno3	Y	44;44;44	0.503167	0.924937	-0.0123653	1	0.993134	0.855701	0.901819	0.95656	0.986212
B2RWS6	B2RWS6	Histone acetyltransferase p300	Ep300	S	12	0.652524	0.938305	-0.0281277	0.828948	0	0.96938	1	0.811314	0
B2RWS6	B2RWS6	Histone acetyltransferase p300	Ep300	S	1715	0.837948	0.948145	-0.0190192	0	1	0	0	0	0.920575
Q8CHI8	Q8CHI8	E1A-binding protein p400	Ep400	S	735	0.807526	0.946221	-0.0247036	0	0.988929	0	0	1	0
Q8CHI8	Q8CHI8	E1A-binding protein p400	Ep400	S	923	0.0842214	0.657328	-0.0594586	0.971499	0.867223	1	0.963102	0.822085	0.813577
Q8CHI8	Q8CHI8	E1A-binding protein p400	Ep400	T	922	0.535796	0.92801	-0.0491998	0.89742	1	0.903424	0	0.850476	0.852502
Q9Z2H5	Q9Z2H5	Band 4.1-like protein 1	Epb41l1	S	510	0.276354	0.88079	-0.120313	0.823487	1	0.967378	0.933328	0.93259	0
Q9Z2H5	Q9Z2H5	Band 4.1-like protein 1	Epb41l1	S	544	0.968118	0.953749	-0.0011922	0.893542	0.893615	0.99061	1	0.82671	0.956073
Q9Z2H5	Q9Z2H5	Band 4.1-like protein 1	Epb41l1	S	650	0.00269078	8.4716e-05	-0.234956	0.851382	1	0	0	0	0
Q9Z2H5	Q9Z2H5	Band 4.1-like protein 1	Epb41l1	S	782	0.526007	0.927344	0.0309168	0.915923	0.819624	0.99548	0.841976	1	0.85255
Q9Z2H5	Q9Z2H5	Band 4.1-like protein 1	Epb41l1	T	475	0.284711	0.883113	0.0218131	0.846362	0.872279	1	0.987946	0.873764	0.921076
O70318	O70318	Band 4.1-like protein 2	Epb41l2	S	38	0.861614	0.949535	0.00295053	0.982475	0.994309	0.972186	1	0.996206	0.989081
O70318	O70318	Band 4.1-like protein 2	Epb41l2	S	698	0.296241	0.886748	0.0306402	0.843801	0.945593	0.950101	0.941574	0.91788	1
O70318	O70318	Band 4.1-like protein 2	Epb41l2	T	192	0.102827	0.714787	0.0456443	0.881479	0.808899	0.831784	0.835335	0.90831	1
O70318	O70318	Band 4.1-like protein 2	Epb41l2	Y	606	0.419983	0.913884	-0.0419956	1	0.907526	0.771343	0.9492	0.902214	0.874987
O70318	O70318	Band 4.1-like protein 2	Epb41l2	S	193	0.102827	0.714787	0.0456443	0.881479	0.808899	0.831784	0.835335	0.90831	1
O70318	O70318	Band 4.1-like protein 2	Epb41l2	S	201	0.116183	0.744939	0.044123	0.870978	0.929509	0.940136	1	0.962731	0.994
O70318	O70318	Band 4.1-like protein 2	Epb41l2	S	630	0.385199	0.907961	0.0367689	0.798914	1	0.978305	0.948949	0.972165	0.972586
O70318	O70318	Band 4.1-like protein 2	Epb41l2	S	86	0.768913	0.945099	-0.00759628	0.975873	0.998765	0.872252	0.96735	1	0.944872
O70318	O70318	Band 4.1-like protein 2	Epb41l2	S	543	0.194464	0.84015	-0.0780139	1	0.860927	0	0	0.891831	0
O70318	O70318	Band 4.1-like protein 2	Epb41l2	S	665	0.325407	0.893575	0.0880429	0	0	0	0.862685	0	1
O70318	O70318	Band 4.1-like protein 2	Epb41l2	S	666	0.518691	0.926613	-0.0132921	1	0.993074	0.892263	0.94829	0.990947	0.952445
Q9WV92	Q9WV92	Band 4.1-like protein 3;Band 4.1-like protein 3, N-terminally processed	Epb41l3	S	486	0.660831	0.938635	-0.00691798	0.982999	0.990668	0.989622	1	0.971798	0.982448
Q9WV92	Q9WV92	Band 4.1-like protein 3;Band 4.1-like protein 3, N-terminally processed	Epb41l3	T	518	0.518312	0.926542	-0.030108	1	0.972136	0.761599	0.996198	0.893223	0.953709
Q9WV92	Q9WV92	Band 4.1-like protein 3;Band 4.1-like protein 3, N-terminally processed	Epb41l3	T	495	0.151286	0.799672	-0.0255617	0.997536	1	0.995976	0.984171	0.952483	0.965041
Q9WV92	Q9WV92	Band 4.1-like protein 3;Band 4.1-like protein 3, N-terminally processed	Epb41l3	T	64	0.498391	0.924406	0.0116878	0.834388	0.876789	0.995772	1	0.88557	0.875141
Q9WV92	Q9WV92	Band 4.1-like protein 3;Band 4.1-like protein 3, N-terminally processed	Epb41l3	T	923	0.270805	0.876614	0.0900328	0	0.885671	0	0.995819	0.935976	1
Q9WV92	Q9WV92	Band 4.1-like protein 3;Band 4.1-like protein 3, N-terminally processed	Epb41l3	S	486	0.744524	0.94378	0.00607572	0.998508	0.951836	0.973808	1	0.983511	0.988662
Q9WV92	Q9WV92	Band 4.1-like protein 3;Band 4.1-like protein 3, N-terminally processed	Epb41l3	T	488	0.510626	0.925646	0.0507488	0	0	1	0	0	0.915146
Q9WV92	Q9WV92	Band 4.1-like protein 3;Band 4.1-like protein 3, N-terminally processed	Epb41l3	T	495	0.744524	0.94378	0.00607572	0.998508	0.951836	0.973808	1	0.983511	0.988662
Q9WV92	Q9WV92	Band 4.1-like protein 3;Band 4.1-like protein 3, N-terminally processed	Epb41l3	S	599	0.720365	0.942398	0.00965134	0.907796	0.920393	0.989815	1	0.875101	0.989956
Q9WV92	Q9WV92	Band 4.1-like protein 3;Band 4.1-like protein 3, N-terminally processed	Epb41l3	S	601	0.495405	0.924032	0.0185511	0.898536	0.970458	0.944586	0.953105	0.931197	1
Q9WV92	Q9WV92	Band 4.1-like protein 3;Band 4.1-like protein 3, N-terminally processed	Epb41l3	S	96	0.759639	0.944607	-0.00468213	0.995278	1	0.994846	0.985154	0.990603	0.991494
Q9WV92	Q9WV92	Band 4.1-like protein 3;Band 4.1-like protein 3, N-terminally processed	Epb41l3	S	63	0.72013	0.94195	-0.0384553	1	0	0.867646	0	0	0.860942
Q9WV92	Q9WV92	Band 4.1-like protein 3;Band 4.1-like protein 3, N-terminally processed	Epb41l3	S	428	0.634366	0.936762	0.00778281	0.972612	0.998018	0.997554	0.991773	1	0.995497
Q9WV92	Q9WV92	Band 4.1-like protein 3;Band 4.1-like protein 3, N-terminally processed	Epb41l3	S	451	0.399206	0.910548	-0.0144152	1	0.982996	0.952299	0.954174	0.980009	0.95771
Q9WV92	Q9WV92	Band 4.1-like protein 3;Band 4.1-like protein 3, N-terminally processed	Epb41l3	S	456	0.397087	0.910184	-0.0142511	1	0.980795	0.953826	0.945355	0.974921	0.961144
Q9WV92	Q9WV92	Band 4.1-like protein 3;Band 4.1-like protein 3, N-terminally processed	Epb41l3	S	804	0.970731	0.953844	0.000563443	0.978179	0.989233	0.9952	1	0.982369	0.986538
Q8BYG9	Q8BYG9	Ephrin type-A receptor 10	Epha10	Y	207	0.411863	0.91264	0.0170228	0.916663	0.985686	0.993389	1	0.979229	0.989953
Q8BYG9	Q8BYG9	Ephrin type-A receptor 10	Epha10	Y	208	0.411863	0.91264	0.0170228	0.916663	0.985686	0.993389	1	0.979229	0.989953
Q03145	Q03145	Ephrin type-A receptor 2	Epha2	S	893	0.657394	0.938386	-0.0148722	0.906402	1	0.782565	0.92003	0.86728	0.967708
Q03145	Q03145	Ephrin type-A receptor 2	Epha2	Y	773	0.218497	0.854477	0.0205811	0.96013	0.961532	0.800256	0.797062	1	0.990582
P54763	P54763	Ephrin type-B receptor 2	Ephb2	S	776	0.239906	0.865543	0.101866	0.955843	0	0	0	0.910328	1
P54754	P54754	Ephrin type-B receptor 3	Ephb3	T	786	0.00773954	0.00845579	-0.141474	0.844488	0.840325	0.877612	1	0	0
P54754;P54761	P54761	Ephrin type-B receptor 3;Ephrin type-B receptor 4	Ephb3;Ephb4	Y	609;596	0.850385	0.948553	0.0130965	0	0.906001	0.874995	0	0	1
P54761	P54761	Ephrin type-B receptor 4	Ephb4	S	769	0.527215	0.927115	0.0424497	0.872072	0.903648	0.887819	0	1	0.952944
P54761	P54761	Ephrin type-B receptor 4	Ephb4	S	770	0.256232	0.876075	-0.103063	0.975526	0	0	1	0	0
Q80VP1	Q80VP1	Epsin-1	Epn1	S	419	0.335007	0.896565	0.114107	0	0.88206	1	0	0.880999	0.991482
Q80VP1	Q80VP1	Epsin-1	Epn1	T	469	0.240481	0.865724	-0.0409535	0.982468	1	0.907879	0.948741	0.983102	0.853457
Q8CHU3	Q8CHU3	Epsin-2	Epn2	S	192	0.0461285	0.428747	0.0783528	0.658864	0.82262	0.814722	0.838214	0.905642	1
Q8CHU3	Q8CHU3	Epsin-2	Epn2	S	172	0.172344	0.821044	0.120971	0.925688	0	0.922741	0.991072	1	0.927002
Q8CHU3	Q8CHU3	Epsin-2	Epn2	S	173	0.158277	0.804866	0.097606	0	0.894959	0.735255	0	0.920372	1
P42567	P42567	Epidermal growth factor receptor substrate 15	Eps15	S	107	0.0453593	0.414193	-0.0976717	0.877217	1	0	0.849603	0	0
P42567	P42567	Epidermal growth factor receptor substrate 15	Eps15	S	798	0.0123415	0.0370871	-0.222841	0.812145	1	0.706899	0	0	0
P42567	P42567	Epidermal growth factor receptor substrate 15	Eps15	S	799	0.0130257	0.0403541	-0.21937	0.812145	1	0.706899	0	0	0
P42567	P42567	Epidermal growth factor receptor substrate 15	Eps15	S	324	0.680119	0.940076	-0.0561125	0	1	0	0	0.874807	0
Q60902	Q60902	Epidermal growth factor receptor substrate 15-like 1	Eps15l1	S	607	0.298989	0.887424	-0.0776772	0.97782	1	0.700887	0	0.98233	0.697379
Q60902	Q60902	Epidermal growth factor receptor substrate 15-like 1	Eps15l1	S	610	0.246504	0.868452	-0.0776772	0.97782	1	0.700887	0.826824	0.98233	0.697379
Q60902	Q60902	Epidermal growth factor receptor substrate 15-like 1	Eps15l1	S	229	0.871047	0.949936	-0.00624258	0.943008	1	0.983073	0.783334	0.945968	0.970088
Q08509	Q08509	Epidermal growth factor receptor kinase substrate 8	Eps8	S	810	0.576406	0.932939	-0.048738	1	0	0.866508	0	0.886375	0
Q08509	Q08509	Epidermal growth factor receptor kinase substrate 8	Eps8	S	814	0.71136	0.94186	0.016368	0.852275	0.886823	0.943306	0.855431	0.802558	1
Q08509	Q08509	Epidermal growth factor receptor kinase substrate 8	Eps8	S	684	0.072125	0.596316	-0.1183	1	0.955039	0.858283	0.857185	0	0.865656
P70424	P70424	Receptor tyrosine-protein kinase erbB-2	Erbb2	Y	1197	0.010032	0.0208117	0.156441	0	0	0.798281	0	1	0.959074
Q80TH2	Q80TH2	Protein LAP2	Erbb2ip	S	849	0.559988	0.930673	0.00947464	0.98289	0.976265	0.976351	1	0.996726	0.994036
Q80TH2	Q80TH2	Protein LAP2	Erbb2ip	S	444	0.640552	0.936386	-0.0254186	0.705243	1	0	0	0	0.886457
Q80TH2	Q80TH2	Protein LAP2	Erbb2ip	S	1171	0.820444	0.947669	-0.00350674	0.915711	0.91488	1	0.984156	0.912245	0.906687
Q80TH2	Q80TH2	Protein LAP2	Erbb2ip	S	712	0.522284	0.926956	0.0463071	0.918001	0.922921	0.642793	0.965528	1	0.999416
Q80TH2	Q80TH2	Protein LAP2	Erbb2ip	T	850	0.523853	0.927565	-0.0577172	0	1	0.941747	0.777158	0	0.760791
Q80TH2	Q80TH2	Protein LAP2	Erbb2ip	T	914	0.726298	0.942492	-0.0106935	0.889382	0	0	0	1	0
Q80TH2	Q80TH2	Protein LAP2	Erbb2ip	Y	1097	0.857922	0.949368	-0.00651487	0.946053	0.922344	0.886834	0.943267	1	0.844364
Q80TH2	Q80TH2	Protein LAP2	Erbb2ip	S	1125	0.0158442	0.0672095	0.113716	0.65864	0.772973	0.843823	0.798599	0.906082	1
Q80TH2	Q80TH2	Protein LAP2	Erbb2ip	S	1276	0.011793	0.0303739	-0.195582	0.972213	1	0.847022	0.929244	0.696519	0
Q80TH2	Q80TH2	Protein LAP2	Erbb2ip	S	1076	0.446947	0.918462	0.107678	0	0	0	1	0	0.91186
Q80TH2	Q80TH2	Protein LAP2	Erbb2ip	S	1077	0.939231	0.952624	-0.00752105	1	0.90134	0	0.874911	0.897196	0.978106
Q80TH2	Q80TH2	Protein LAP2	Erbb2ip	S	1013	0.760201	0.944634	0.0356895	0.929187	0.935271	0.327786	0.92451	1	0.999362
Q80TH2	Q80TH2	Protein LAP2	Erbb2ip	S	869	0.28671	0.883669	-0.0472772	1	0.869276	0.704901	0.768139	0.919317	0.747133
Q80TH2	Q80TH2	Protein LAP2	Erbb2ip	S	440	0.271999	0.87497	0.0355833	0	0	1	0	0.93383	0.959956
Q99MI1	Q99MI1	ELKS/Rab6-interacting/CAST family member 1	Erc1	Y	429	0.545944	0.929338	0.02063	0.836491	1	0.955235	0.956539	0.943012	0.977929
P35689	P35689	DNA repair protein complementing XP-G cells homolog	Ercc5	S	341	0.725818	0.942718	-0.00569233	0.980052	1	0.98356	0.992596	0.989001	0.971636
Q8BHK9	Q8BHK9	DNA excision repair protein ERCC-6-like	Ercc6l	S	1021	0.252097	0.871032	-0.019019	1	0.991238	0.889125	0.876139	0.957785	0.95473
P70459	P70459	ETS domain-containing transcription factor ERF	Erf	S	327	0.228178	0.859754	-0.0223802	0.988318	1	0.980418	0.945639	0.960097	0.936407
Q8R180	Q8R180	ERO1-like protein alpha	Ero1l	S	106	0.737155	0.943365	0.0200811	0.947711	0.771537	0.994017	0.966179	0.789598	1
Q99JZ7	Q99JZ7	ERBB receptor feedback inhibitor 1	Errfi1	S	301	0.283982	0.882973	-0.0181962	1	0.987724	0.97247	0.955715	0.956995	0.967561
Q3V1V3	Q3V1V3	ESF1 homolog	Esf1	S	651	0.694673	0.940257	-0.0631222	0.847974	0.751958	0	0.890446	1	0
Q3V1V3	Q3V1V3	ESF1 homolog	Esf1	S	156	0.876067	0.950156	-0.00236709	0.979805	0.990019	1	0.997602	0.981095	0.981423
Q3V1V3	Q3V1V3	ESF1 homolog	Esf1	S	651	0.362565	0.903565	0.0216628	0.978328	0.934978	0.942615	0.997461	0.981257	1
Q3V1V3	Q3V1V3	ESF1 homolog	Esf1	S	657	0.362565	0.903565	0.0216628	0.978328	0.934978	0.942615	0.997461	0.981257	1
P60330	P60330	Separin	Espl1	S	239	0.468069	0.919872	-0.0533422	1	0.992286	0	0.947457	0.976647	0.768627
Q3U7R1	Q3U7R1	Extended synaptotagmin-1	Esyt1	S	951	0.379406	0.908155	-0.0447375	0.957905	0.973043	0.909075	0.759968	0	1
Q3TZZ7	Q3TZZ7	Extended synaptotagmin-2	Esyt2	S	679	0.422132	0.914112	-0.0978837	0.885829	0.903057	0.823842	0.650302	1	0
Q3TZZ7	Q3TZZ7	Extended synaptotagmin-2	Esyt2	S	682	0.316164	0.891163	-0.127586	0.894811	0	0	1	0	0
Q3TZZ7	Q3TZZ7	Extended synaptotagmin-2	Esyt2	S	662	0.402002	0.90997	0.131703	1	0	0.895141	0	0.933914	0.981545
Q3TZZ7	Q3TZZ7	Extended synaptotagmin-2	Esyt2	T	677	0.445525	0.917677	-0.0354856	1	0.851396	0.669045	0.859299	0.858529	0.844378
Q3TZZ7	Q3TZZ7	Extended synaptotagmin-2	Esyt2	S	679	0.359785	0.902977	0.022716	0.898076	0.960869	0.958769	0.943457	0.939881	1
Q3TZZ7	Q3TZZ7	Extended synaptotagmin-2	Esyt2	S	682	0.5469	0.929628	0.0932731	0	1	0.979535	0	0.972875	0.834029
Q3TZZ7	Q3TZZ7	Extended synaptotagmin-2	Esyt2	S	685	0.848312	0.948947	-0.00398465	0.993209	0.960869	0.958769	0.976229	0.939881	1
Q3TZZ7	Q3TZZ7	Extended synaptotagmin-2	Esyt2	T	677	0.152776	0.800807	-0.0599482	0.84062	1	0.922191	0.913916	0.788435	0.834029
Q99LC5	Q99LC5	Electron transfer flavoprotein subunit alpha, mitochondrial	Etfa	S	140	0.159559	0.811221	-0.0760304	1	0.978476	0	0	0.949974	0.671835
P97360	P97360	Transcription factor ETV6	Etv6	T	18	0.884957	0.950131	-0.00775483	0.917917	0	0.913587	0	1	0
P97360	P97360	Transcription factor ETV6	Etv6	S	16	0.801218	0.946002	-0.0295811	0.712738	0.880905	0.768227	0	0	1
P97360	P97360	Transcription factor ETV6	Etv6	S	22	0.532027	0.927989	0.0127174	0.981726	0.93854	0.958535	0.921771	0.966997	1
P97360	P97360	Transcription factor ETV6	Etv6	T	18	0.886113	0.950262	0.0144881	0.923492	0.845555	0	0.953231	1	0.8241
P70429	P70429	Ena/VASP-like protein	Evl	S	327	0.858378	0.948865	0.0177988	0.632032	0.79064	0.879602	0.759972	0	1
P70429	P70429	Ena/VASP-like protein	Evl	S	329	0.77796	0.945569	-0.0110876	1	0.873972	0.854533	0.945194	0.969197	0.862604
Q9D4H1	Q9D4H1	Exocyst complex component 2	Exoc2	S	432	0.175288	0.823601	0.12519	0	0.936199	0.934932	0.943994	0.93755	1
O35382	O35382	Exocyst complex component 4	Exoc4	S	32	0.494781	0.92397	0.0158345	0.965047	0.891112	0.922971	1	0.951978	0.980126
Q9CRA8	Q9CRA8	Exosome complex component RRP46	Exosc5	S	23	0.238423	0.864747	-0.0357111	0.976237	1	0.953425	0.981165	0.880586	0.97836
Q9CRA8	Q9CRA8	Exosome complex component RRP46	Exosc5	T	15	0.659284	0.938222	0.0431156	0	1	0	0	0.867807	0.801053
Q9CRA8	Q9CRA8	Exosome complex component RRP46	Exosc5	S	23	0.0170849	0.0802212	0.16868	0	0	0.629386	0.784641	1	0.81752
Q61188	Q61188	Histone-lysine N-methyltransferase EZH2	Ezh2	T	482	0.111909	0.739204	-0.107468	1	0.889169	0	0.774644	0	0.820677
Q61188	Q61188	Histone-lysine N-methyltransferase EZH2	Ezh2	T	487	0.352917	0.901492	0.0246221	0.894038	0.972023	0.965304	0.940997	1	0.951233
O88792	O88792	Junctional adhesion molecule A	F11r	S	285	0.965203	0.953643	0.00153177	0.883162	1	0.908671	0.810776	0.959434	0.929198
O88792	O88792	Junctional adhesion molecule A	F11r	S	288	0.645505	0.936493	-0.0595302	1	0	0	0	0.864416	0
O88792	O88792	Junctional adhesion molecule A	F11r	T	286	0.315945	0.893656	-0.0309504	0	0	1	0.956156	0	0
O88792	O88792	Junctional adhesion molecule A	F11r	S	285	0.941282	0.952757	0.00365209	0.958664	0.808553	0.721572	0.696758	0.782208	1
O88792	O88792	Junctional adhesion molecule A	F11r	T	286	0.941282	0.952757	0.00365209	0.958664	0.808553	0.721572	0.696758	0.782208	1
P54731	P54731	FAS-associated factor 1	Faf1	S	581	0.4281	0.915154	0.0251206	0.840484	0.949129	0.784504	0.85262	1	0.901552
P54731	P54731	FAS-associated factor 1	Faf1	S	319	0.753886	0.944293	-0.0185855	1	0.760127	0.87747	0.595823	0.919633	0.74284
P54731	P54731	FAS-associated factor 1	Faf1	T	579	0.729345	0.942919	0.0209913	0.804881	0.923492	0.733495	1	0.82842	0.987248
Q8BQS4	Q8BQS4	Protein FAM102B	Fam102b	S	267	0.723742	0.942095	0.0249967	0.998257	0.861499	0.901713	0	1	0.965156
Q8BQS4	Q8BQS4	Protein FAM102B	Fam102b	S	160	0.0896463	0.676977	-0.0953093	0.950702	1	0.878368	0.79324	0	0.879676
Q8BQS4	Q8BQS4	Protein FAM102B	Fam102b	Y	332	0.100453	0.697707	-0.0539712	0	0	0	0	0.873295	1
Q9CQY2	Q9CQY2	RNMT-activating mini protein	Fam103a1	S	36	0.119017	0.750918	-0.0296825	0.983199	1	0.963483	0.978683	0.936438	0.950784
Q9CQY2	Q9CQY2	RNMT-activating mini protein	Fam103a1	S	5	0.424923	0.914651	-0.0417319	1	0.860589	0.941307	0.93185	0.742897	0.955673
Q8BH49	Q8BH49	Sesquipedalian-1	Fam109a	S	183	0.0430688	0.399234	-0.0716999	1	0.988367	0.862125	0.786576	0.876517	0.740832
Q8VE94	Q8VE94	Protein FAM110C	Fam110c	S	347	0.758962	0.944402	-0.0486819	1	0	0.958552	0.964741	0.916126	0
Q8VE94	Q8VE94	Protein FAM110C	Fam110c	S	350	0.830663	0.948146	-0.004106	0.957557	1	0.951805	0.955956	0.961038	0.984337
Q9D2L9	Q9D2L9	Protein FAM111A	Fam111a	S	59	0.829406	0.948088	0.00401895	0.984229	0.951727	0.92738	0.942334	0.951865	1
Q9D281	Q9D281	Protein Noxp20	Fam114a1	T	197	0.486204	0.923196	0.0424442	1	0	0	0.918151	0.967327	0.947413
Q9D281	Q9D281	Protein Noxp20	Fam114a1	T	186	0.503577	0.924987	-0.0118494	0.995753	1	0.963459	0.97011	0.955709	0.997156
Q8VE88	Q8VE88	Protein FAM114A2	Fam114a2	S	114	0.120733	0.746905	0.186389	0	0	0	1	0.817842	0.931794
Q3U3E2	Q3U3E2	Protein FAM117B	Fam117b	T	12	0.468908	0.921541	0.0490476	0	0	1	0	0	0.945423
Q3U3E2	Q3U3E2	Protein FAM117B	Fam117b	T	219	0.51565	0.926448	-0.043248	0	1	0.816203	0	0.91306	0
Q6A0A9	Q6A0A9	Constitutive coactivator of PPAR-gamma-like protein 1	FAM120A	S	382	0.0292817	0.238357	-0.0713885	0.982534	0.996784	1	0.938947	0.860171	0.901348
Q6A0A9	Q6A0A9	Constitutive coactivator of PPAR-gamma-like protein 1	FAM120A	T	386	0.229564	0.858463	0.205788	0	0.756433	0	1	0.970019	0.885131
Q6A0A9	Q6A0A9	Constitutive coactivator of PPAR-gamma-like protein 1	FAM120A	T	653	0.7636	0.944818	-0.00568123	0.994776	0.973161	0.959409	0.980406	0.945073	1
Q9DB52	Q9DB52	Protein FAM122A	Fam122a	S	73	0.174026	0.823632	-0.16202	1	0	0.794317	0.984284	0	0
Q9DB52	Q9DB52	Protein FAM122A	Fam122a	S	140	0.188335	0.835125	0.0705635	0.878555	0	0.973596	1	0.906095	0.891918
Q9DB52	Q9DB52	Protein FAM122A	Fam122a	S	144	0.294878	0.882084	-0.0823502	0.927854	0	0	1	0	0
Q9DB52	Q9DB52	Protein FAM122A	Fam122a	S	59	0.624181	0.935626	-0.0568048	0.783976	0.810882	1	0.787382	0.968864	0
Q9DB52	Q9DB52	Protein FAM122A	Fam122a	S	32	0.435082	0.916178	0.0365893	0.900362	0.774825	0.926517	0.971599	0.817398	1
Q9DB52	Q9DB52	Protein FAM122A	Fam122a	S	34	0.318189	0.893048	0.0346047	1	0.892534	0.877076	0.928129	0.999036	0.997879
Q9DB52	Q9DB52	Protein FAM122A	Fam122a	S	267	0.685871	0.939848	-0.0449782	0.90412	0	0	1	0.839838	0
Q9DB52	Q9DB52	Protein FAM122A	Fam122a	S	140	0.592688	0.933504	-0.023604	0.982283	0.856126	0.816893	1	0.872038	0.872086
Q9DB52	Q9DB52	Protein FAM122A	Fam122a	S	144	0.592688	0.933504	-0.023604	0.982283	0.856126	0.816893	1	0.872038	0.872086
Q6NZE7	Q6NZE7	Protein FAM122B	Fam122b	S	23	0.887179	0.949587	-0.00977713	1	0	0.769538	0.867379	0.718256	0.795823
Q6NZE7	Q6NZE7	Protein FAM122B	Fam122b	S	25	0.658286	0.938894	0.0320665	0	1	0.859221	0.933502	0.921081	0.809567
Q8R1F1	Q8R1F1	Niban-like protein 1	Fam129b	S	628	0.321332	0.894017	-0.0163696	0.99691	1	0.99572	0.98337	0.978836	0.968564
Q8R1F1	Q8R1F1	Niban-like protein 1	Fam129b	S	635	0.710084	0.941486	-0.0496239	1	0	0	0.869556	0	0.818748
Q8R1F1	Q8R1F1	Niban-like protein 1	Fam129b	S	695	0.121376	0.75492	-0.0422061	0.922876	1	0.69449	0.667615	0.899002	0.87554
Q8R1F1	Q8R1F1	Niban-like protein 1	Fam129b	S	647	0.32843	0.89581	-0.0172333	0.961185	0.987161	1	0.995816	0.954925	0.936045
Q8R1F1	Q8R1F1	Niban-like protein 1	Fam129b	S	669	0.422839	0.914398	0.102275	0	1	0	0	0.86279	0.926338
Q8R1F1	Q8R1F1	Niban-like protein 1	Fam129b	S	669	0.447523	0.917969	0.0253156	0.839764	0.976195	0.968673	1	0.983412	0.930064
Q8R1F1	Q8R1F1	Niban-like protein 1	Fam129b	S	670	0.447523	0.917969	0.0253156	0.839764	0.976195	0.968673	1	0.983412	0.930064
Q8R1F1	Q8R1F1	Niban-like protein 1	Fam129b	S	674	0.768708	0.945089	0.00668585	0.911527	0.976195	0.968673	1	0.983412	0.930064
Q3TY60	Q3TY60	Protein FAM131B	Fam131b	S	117	0.289153	0.884624	0.0189585	0.952063	0.937975	0.933073	0.952849	0.96768	1
Q3TY60	Q3TY60	Protein FAM131B	Fam131b	S	114	0.466958	0.920599	0.0145003	0.941663	0.938795	0.922919	0.988534	1	0.951642
Q3TY60	Q3TY60	Protein FAM131B	Fam131b	S	117	0.466958	0.920599	0.0145003	0.941663	0.938795	0.922919	0.988534	1	0.951642
Q9CQV4	Q9CQV4	Protein FAM134C	Fam134c	S	26	0.918022	0.951864	-0.00191342	0.951517	0.961943	1	0.969359	0.980073	0.925332
Q9CQV4	Q9CQV4	Protein FAM134C	Fam134c	S	320	0.914799	0.951736	-0.00233058	1	0.972821	0.931257	0.991119	0.972579	0.992845
Q3U2I3	Q3U2I3	FTS and Hook-interacting protein	Fam160a2	S	510	0.81285	0.947307	0.00371776	0.966384	0.988231	1	0.996859	0.984747	0.982888
Q9D6U8	Q9D6U8	Protein FAM162A	Fam162a	S	132	0.642106	0.937437	0.0217827	0.892637	0.97576	0.877519	0	0.97091	1
A2A699	A2A699	Protein FAM171A2	Fam171a2	S	785	0.360799	0.903136	-0.0625118	1	0.909658	0.987074	0.676691	0.84221	0.833077
A2A699	A2A699	Protein FAM171A2	Fam171a2	S	445	0.533155	0.928081	-0.0205161	0.9708	1	0.976959	0.823754	0.93737	0.950862
Q3UQI9	Q3UQI9	Protein FAM188B	Fam188b	S	143	0.435133	0.916231	-0.0164242	0.993459	1	0.997059	0.967494	0.932554	0.997651
Q3UQI9	Q3UQI9	Protein FAM188B	Fam188b	S	123	0.865189	0.94969	0.00284038	1	0.965537	0.986022	0.993342	0.988031	0.987325
Q8CGI1	Q8CGI1	Protein FAM193A	Fam193a	S	1151	0.724003	0.94227	-0.0337998	0	1	0	0	0.946643	0
Q8CGI1	Q8CGI1	Protein FAM193A	Fam193a	S	293	0.493997	0.923866	-0.0206929	0.977198	1	0.809828	0.69121	0.915775	0.979652
Q8CGI1	Q8CGI1	Protein FAM193A	Fam193a	S	683	0.0228909	0.142447	-0.153483	0.999523	1	0	0.933721	0	0.5185
Q8CGI1	Q8CGI1	Protein FAM193A	Fam193a	T	674	0.0227581	0.150585	-0.153447	0.999523	1	0	0.933721	0	0.5185
Q9CQB2	Q9CQB2	Protein FAM195A	Fam195a	S	82	0.124496	0.760547	-0.0389281	1	0.978451	0.991761	0.998519	0.959739	0.897157
Q3UGS4	Q3UGS4	Protein FAM195B	Fam195b	S	21	0.486609	0.922984	0.0363372	0.861891	0.88329	0.826814	1	0.878063	0.977305
Q3UGS4	Q3UGS4	Protein FAM195B	Fam195b	T	23	0.0820469	0.646993	-0.235536	0.955081	0.966126	1	0.872754	0	0.819828
Q3UGS4	Q3UGS4	Protein FAM195B	Fam195b	T	30	0.078436	0.634243	0.0854645	0.774257	0.702943	0.9836	0.912077	0.825031	1
P58468	P58468	Protein FAM207A	Fam207a	S	38	0.51535	0.926278	0.0104272	0.940146	0.947055	0.987445	1	0.953652	0.963327
Q69ZR9	Q69ZR9	Protein FAM208A	Fam208a	S	836	0.504956	0.925093	0.0319813	0.93559	0.797089	0.897673	0.936136	1	0.844672
Q69ZR9	Q69ZR9	Protein FAM208A	Fam208a	S	921	0.657416	0.938387	-0.0150836	0.914514	0.876124	0.948894	1	0.785589	0.942868
Q69ZR9	Q69ZR9	Protein FAM208A	Fam208a	T	1146	0.4295	0.915348	-0.0362243	0.770148	1	0.888709	0.862007	0.849577	0.762585
Q6PGL7	Q6PGL7	WASH complex subunit FAM21	Fam21	S	388	0.545111	0.929254	0.0234155	0.850463	1	0.979717	0.986122	0.940541	0.987167
Q6PGL7	Q6PGL7	WASH complex subunit FAM21	Fam21	S	768	0.870759	0.949758	-0.0111999	1	0.968379	0	0.972116	0.981858	0.935529
Q6PGL7	Q6PGL7	WASH complex subunit FAM21	Fam21	S	614	0.670288	0.938628	-0.0445013	1	0	0	0	0.910522	0
Q6PGL7	Q6PGL7	WASH complex subunit FAM21	Fam21	S	1333	0.494289	0.92392	-0.0141495	0.966701	1	0.975567	0.951106	0.929808	0.984221
Q6PGL7	Q6PGL7	WASH complex subunit FAM21	Fam21	S	747	0.661112	0.938657	-0.00675303	0.997555	1	0.986236	0.997044	0.9895	0.988592
Q6PGL7	Q6PGL7	WASH complex subunit FAM21	Fam21	S	723	0.977969	0.954103	0.000448958	0.984859	0.998256	0.980594	0.993279	0.984356	1
Q6PGL7	Q6PGL7	WASH complex subunit FAM21	Fam21	T	833	0.035141	0.312385	0.0536896	0.777063	0.791956	0.961405	1	0.859403	0.888692
Q6PGL7	Q6PGL7	WASH complex subunit FAM21	Fam21	S	157	0.926278	0.952156	-0.00948813	0.934661	0.928273	0	0.964561	0.827037	1
Q6PGL7	Q6PGL7	WASH complex subunit FAM21	Fam21	S	159	0.927999	0.952141	-0.00948813	0.934661	0.928273	0	0.964561	0.827037	1
Q6PGL7	Q6PGL7	WASH complex subunit FAM21	Fam21	S	783	0.227884	0.859627	-0.138516	0.870625	0.959357	1	0.864811	0	0.906141
Q6PGL7	Q6PGL7	WASH complex subunit FAM21	Fam21	S	533	0.332928	0.89686	0.0252085	0.979894	0.906858	0.935575	0.945257	1	0.964477
Q6PGL7	Q6PGL7	WASH complex subunit FAM21	Fam21	S	873	0.00650784	0.00492868	0.13363	0	0	0	0	1	0.904571
Q6PGL7	Q6PGL7	WASH complex subunit FAM21	Fam21	S	343	0.26888	0.877476	0.0448888	0.764195	0.914545	0.909969	1	0.95154	0.901357
Q6PGL7	Q6PGL7	WASH complex subunit FAM21	Fam21	S	832	0.035141	0.312385	0.0536896	0.777063	0.791956	0.961405	1	0.859403	0.888692
Q6PGL7	Q6PGL7	WASH complex subunit FAM21	Fam21	S	613	0.657637	0.937938	-0.0452497	1	0	0	0	0.910522	0
Q8BXQ8	Q8BXQ8	Protein FAM53C	Fam53c	S	122	0.026878	0.206376	-0.0816477	1	0.998453	0.837614	0.947266	0.841428	0.849186
Q76LS9	Q76LS9	Protein FAM63A	Fam63a	S	103	0.00265825	8.85682e-05	0.2046	0.604519	0.622787	0.92363	0.925808	0.868776	1
Q6PDI6	Q6PDI6	Protein FAM63B	Fam63b	S	21	0.681531	0.938819	-0.042924	1	0	0.884101	0.898079	0.924514	0
Q8BFY7	Q8BFY7	Protein FAM64A	Fam64a	S	58	0.0975467	0.701195	-0.144239	0.788143	0.988725	0.852921	1	0.746082	0
Q8BFY7	Q8BFY7	Protein FAM64A	Fam64a	S	128	0.285704	0.880111	-0.0952327	0.948809	0	1	0	0	0
Q8BFY7	Q8BFY7	Protein FAM64A	Fam64a	S	72	0.995549	0.954713	0.000325799	1	0.808611	0.980663	0	0.991573	0.818755
Q68FE6	Q68FE6	Protein FAM65A	Fam65a	S	347	0.744995	0.943807	-0.00726478	0.998778	1	0.856856	0.929644	0.984553	0.990588
Q68FE6	Q68FE6	Protein FAM65A	Fam65a	S	875	0.803201	0.947309	-0.0371702	0	0.987621	1	0	0.933147	0
Q68FE6	Q68FE6	Protein FAM65A	Fam65a	S	748	0.625485	0.936093	0.0136716	0.942046	0.890854	0.833376	0.773855	0.89082	1
Q68FE6	Q68FE6	Protein FAM65A	Fam65a	S	22	0.322193	0.893874	-0.105333	0.984178	0.988877	0.949311	0	1	0
A1L3T7	A1L3T7	Protein FAM65C	Fam65c	S	384	0.899511	0.951122	0.00446674	0.910754	0.776521	0.937952	1	0.808569	0.896214
Q8BK03	Q8BK03	Protein FAM73B	Fam73b	S	276	0.343832	0.899497	0.0183138	0.902871	0.927723	0.970737	1	0.931036	0.966768
Q80XP8	Q80XP8	Protein FAM76B	Fam76b	S	193	0.26484	0.876091	-0.0198593	0.99992	1	0.95978	0.961496	0.984053	0.956644
Q148V8	Q148V8	Protein FAM83H	Fam83h	S	948	0.240096	0.86578	0.0583875	0.983518	0	0.971588	1	0.979983	0.987371
Q148V8	Q148V8	Protein FAM83H	Fam83h	S	522	0.423747	0.914675	0.0396297	0	1	0	0	0.986491	0.919733
Q148V8	Q148V8	Protein FAM83H	Fam83h	S	871	0.559431	0.930622	-0.0130561	0.971376	0.984649	0.982872	1	0.923456	0.99051
Q148V8	Q148V8	Protein FAM83H	Fam83h	S	904	0.881993	0.950398	-0.00876267	0.997337	0.744431	1	0.898675	0.721358	0.978385
Q148V8	Q148V8	Protein FAM83H	Fam83h	S	915	0.595894	0.933196	0.027444	0.878107	0.85103	0	0.828827	1	0.853582
Q148V8	Q148V8	Protein FAM83H	Fam83h	S	926	0.918872	0.951894	0.00621514	0.905713	0.641663	1	0.766282	0.796724	0.777756
Q148V8	Q148V8	Protein FAM83H	Fam83h	S	778	0.545544	0.927756	0.0407307	0	0.65681	0	0	1	0
Q3UVG3	Q3UVG3	Protein FAM91A1	Fam91a1	S	671	0.825933	0.947926	0.00400679	0.96299	0.990236	0.98011	0.937944	0.969837	1
Q3UVG3	Q3UVG3	Protein FAM91A1	Fam91a1	S	828	0.309835	0.890012	0.0297009	0	0.728162	1	0.998509	0	0.949586
Q3UVG3	Q3UVG3	Protein FAM91A1	Fam91a1	S	16	0.499893	0.924545	-0.0178695	0.942561	0.974622	0.94073	1	0.970869	0.871326
Q3UVG3	Q3UVG3	Protein FAM91A1	Fam91a1	T	20	0.499893	0.924545	-0.0178695	0.942561	0.974622	0.94073	1	0.970869	0.871326
Q80V62	Q80V62	Fanconi anemia group D2 protein homolog	Fancd2	S	10	0.422933	0.913799	-0.0691859	0.780567	0.826079	0.917035	1	0	0.877485
F8VPU2	F8VPU2	FERM, RhoGEF and pleckstrin domain-containing protein 1	Farp1	S	427	0.131162	0.771985	-0.0268327	0.995922	1	0.997486	0.998847	0.951794	0.962851
F8VPU2	F8VPU2	FERM, RhoGEF and pleckstrin domain-containing protein 1	Farp1	S	373	0.982765	0.954273	0.000348813	0.982768	0.999587	0.976107	0.975918	0.983343	1
F8VPU2	F8VPU2	FERM, RhoGEF and pleckstrin domain-containing protein 1	Farp1	S	892	0.241643	0.86626	0.0557006	0.907686	0.865124	0.880148	0.713581	1	0.951191
F8VPU2	F8VPU2	FERM, RhoGEF and pleckstrin domain-containing protein 1	Farp1	T	24	0.936436	0.952576	-0.00120712	0.983786	0.980329	0.99661	1	0.977844	0.983468
F8VPU2	F8VPU2	FERM, RhoGEF and pleckstrin domain-containing protein 1	Farp1	S	370	0.342315	0.899565	-0.170273	1	0.902358	0	0.987833	0.942351	0
F8VPU2	F8VPU2	FERM, RhoGEF and pleckstrin domain-containing protein 1	Farp1	S	373	0.343676	0.899061	-0.169278	1	0.902358	0	0.987833	0.942351	0
F8VPU2	F8VPU2	FERM, RhoGEF and pleckstrin domain-containing protein 1	Farp1	T	371	0.34411	0.899267	-0.169078	1	0.902358	0	0.987833	0.942351	0
Q91VS8	Q91VS8	FERM, RhoGEF and pleckstrin domain-containing protein 2	Farp2	S	863	0.287234	0.883847	0.0549647	0.799656	0.955515	0.754526	0.963688	0.985573	1
P25446	P25446	Tumor necrosis factor receptor superfamily member 6	Fas	S	220	0.785224	0.94594	-0.0120686	0.995687	0.883799	0.830935	1	0.912111	0.924212
P25446	P25446	Tumor necrosis factor receptor superfamily member 6	Fas	S	222	0.485555	0.922858	-0.0391498	1	0.806134	0.898434	0.80382	0.868204	0.816657
P25446	P25446	Tumor necrosis factor receptor superfamily member 6	Fas	T	314	0.012939	0.0408108	0.164824	0.749922	0	0	0	0.981486	1
P19096	P19096	Fatty acid synthase;[Acyl-carrier-protein] S-acetyltransferase;[Acyl-carrier-protein] S-malonyltransferase;3-oxoacyl-[acyl-carrier-protein] synthase;3-oxoacyl-[acyl-carrier-protein] reductase;3-hydroxyacyl-[acyl-carrier-protein] dehydratase;Enoyl-[acyl-carrier-protein] reductase;Oleoyl-[acyl-carrier-protein] hydrolase	Fasn	S	2415	0.273224	0.878787	-0.137351	1	0.879038	0.914102	0.995496	0.967484	0
P19096	P19096	Fatty acid synthase;[Acyl-carrier-protein] S-acetyltransferase;[Acyl-carrier-protein] S-malonyltransferase;3-oxoacyl-[acyl-carrier-protein] synthase;3-oxoacyl-[acyl-carrier-protein] reductase;3-hydroxyacyl-[acyl-carrier-protein] dehydratase;Enoyl-[acyl-carrier-protein] reductase;Oleoyl-[acyl-carrier-protein] hydrolase	Fasn	Y	2417	0.273448	0.879074	-0.13666	1	0.879038	0.914102	0.995496	0.967484	0
Q2PZL6	Q2PZL6	Protocadherin Fat 4	Fat4	S	4878	0.327613	0.895582	0.0190651	0.945482	0.980565	0.951318	0.986586	1	0.992637
P35550	P35550	rRNA 2'-O-methyltransferase fibrillarin	Fbl	S	130	0.748525	0.944001	-0.00900061	0.961351	0.966358	0.914882	1	0.932182	0.969544
Q71FD7	Q71FD7	Filamin-binding LIM protein 1	Fblim1	S	193	0.650628	0.937916	-0.0110657	0.954484	1	0.948192	0.873436	0.93713	0.976384
P37889	P37889	Fibulin-2	Fbln2	S	574	0.326732	0.895257	-0.053261	1	0.946182	0.905253	0.724577	0.945039	0.820954
Q9CZV8	Q9CZV8	F-box/LRR-repeat protein 20	Fbxl20	T	417	0.995402	0.954715	-9.62034e-05	0.979255	0.964467	1	0.970802	0.980986	0.96238
Q9CZV8	Q9CZV8	F-box/LRR-repeat protein 20	Fbxl20	S	421	0.669037	0.939178	0.01082	0.98762	0.952396	0.87517	0.973355	1	0.981732
Q9CZV8	Q9CZV8	F-box/LRR-repeat protein 20	Fbxl20	S	425	0.359608	0.902853	-0.0589493	0.932758	0.963473	0.999701	0.966911	0	1
Q9CZV8	Q9CZV8	F-box/LRR-repeat protein 20	Fbxl20	T	417	0.986261	0.954395	-0.00132775	1	0.964334	0.583704	0.985556	0.965112	0.994038
Q9CZV8	Q9CZV8	F-box/LRR-repeat protein 20	Fbxl20	Y	412	0.699782	0.940523	0.0394722	0	0	1	0	0.905665	0
Q8CHQ0	Q8CHQ0	F-box only protein 4	Fbxo4	S	11	0.597103	0.933881	-0.00854102	1	0.999262	0.881338	0.887573	0.971747	0.99699
Q9QZN4	Q9QZN4	F-box only protein 6	Fbxo6	S	276	0.153262	0.801864	-0.0288684	0.993646	1	0.98639	0.993575	0.971373	0.933328
Q8BIA4	Q8BIA4	F-box/WD repeat-containing protein 8	Fbxw8	S	84	0.428342	0.915173	0.0374399	1	0.813358	0.994583	0.900597	0.983216	0.964101
Q8BIA4	Q8BIA4	F-box/WD repeat-containing protein 8	Fbxw8	S	86	0.703874	0.941414	0.00583743	0.994339	0.985876	0.98037	0.975506	1	0.996086
Q8BIA4	Q8BIA4	F-box/WD repeat-containing protein 8	Fbxw8	S	84	0.667036	0.939043	-0.0119766	0.962472	1	0.812224	0.908102	0.956522	0.966762
Q8BIA4	Q8BIA4	F-box/WD repeat-containing protein 8	Fbxw8	S	86	0.667036	0.939043	-0.0119766	0.962472	1	0.812224	0.908102	0.956522	0.966762
Q3UQN2	Q3UQN2	F-BAR domain only protein 2	Fcho2	S	507	0.902678	0.950691	-0.00717751	1	0	0	0.914311	0	0.991229
Q3UQN2	Q3UQN2	F-BAR domain only protein 2	Fcho2	S	508	0.543782	0.928482	-0.0825175	0.812535	0.939526	0.928629	0	1	0
Q3UQN2	Q3UQN2	F-BAR domain only protein 2	Fcho2	T	385	0.798231	0.946162	-0.0384031	0	1	0	0	0.945541	0
Q3UQN2	Q3UQN2	F-BAR domain only protein 2	Fcho2	S	487	0.371834	0.905429	0.0243216	0.91074	0.980663	0.861785	0.925618	0.97412	1
Q3UQN2	Q3UQN2	F-BAR domain only protein 2	Fcho2	S	495	0.150789	0.799298	-0.191412	0.928698	1	0.990884	0.943869	0.901831	0
Q3UQN2	Q3UQN2	F-BAR domain only protein 2	Fcho2	T	494	0.000450186	1.50189e-11	0.271788	0	0	0	0	0.918181	1
Q3UQN2	Q3UQN2	F-BAR domain only protein 2	Fcho2	S	532	0.915364	0.95176	-0.00176003	0.990142	0.97018	0.987976	1	0.987092	0.967747
Q3UQN2	Q3UQN2	F-BAR domain only protein 2	Fcho2	S	535	0.772062	0.945087	-0.00904182	1	0	0	0	0	0.973941
Q3UQN2	Q3UQN2	F-BAR domain only protein 2	Fcho2	S	487	0.929507	0.952048	-0.0118983	0	1	0	0	0	0.974965
Q3UQN2	Q3UQN2	F-BAR domain only protein 2	Fcho2	S	391	0.847234	0.948839	-0.0235903	0	1	0.863988	0	0	0.917144
Q3UQN2	Q3UQN2	F-BAR domain only protein 2	Fcho2	S	394	0.146664	0.793298	0.070017	0.591069	0.727004	1	0.922132	0.839015	0.72938
Q3UQN2	Q3UQN2	F-BAR domain only protein 2	Fcho2	T	491	0.877845	0.950125	-0.0362326	1	0	0.971615	0	0.963394	0
Q3UQN2	Q3UQN2	F-BAR domain only protein 2	Fcho2	T	494	0.286346	0.882467	-0.178989	0	1	0.978464	0	0	0
P70451	P70451	Tyrosine-protein kinase Fer	Fer	Y	715	0.425517	0.915301	0.0990598	0.978132	0	0	1	0.947766	0.96875
P70451	P70451	Tyrosine-protein kinase Fer	Fer	Y	402	0.488908	0.923316	0.0113636	0.967776	0.972798	0.963198	0.962222	0.976781	1
Q8CIB5	Q8CIB5	Fermitin family homolog 2	Fermt2	S	159	0.330099	0.896129	0.034262	0.9847	0.884845	0.881082	0.983077	0.990996	1
Q8CIB5	Q8CIB5	Fermitin family homolog 2	Fermt2	S	351	0.183277	0.828648	-0.0501373	0	0	1	0.801505	0.667372	0
P52734	P52734	FYVE, RhoGEF and PH domain-containing protein 1	Fgd1	S	815	0.158781	0.80838	-0.0467022	0	1	0.94784	0.952093	0	0
P52734	P52734	FYVE, RhoGEF and PH domain-containing protein 1	Fgd1	T	710	0.414618	0.913044	0.0296563	0.997657	0.860491	0.801837	0.895496	1	0.974014
Q66JX5	Q66JX5	FGFR1 oncogene partner	Fgfr1op	S	160	0.420436	0.913024	-0.117988	0.796654	0.938616	1	0	0.885623	0
Q3ULZ2	Q3ULZ2	FH2 domain-containing protein 1	Fhdc1	S	681	0.806417	0.945863	0.00644394	0.796739	0	1	0.919404	0.949288	0
Q6P9Q4	Q6P9Q4	FH1/FH2 domain-containing protein 1	Fhod1	S	527	0.219396	0.854994	0.0322635	0.881972	0.888775	0.909956	0.921727	0.899836	1
Q6P9Q4	Q6P9Q4	FH1/FH2 domain-containing protein 1	Fhod1	S	370	0.427733	0.913762	-0.0667992	0	1	0	0.897409	0.615373	0.674837
Q6P9Q4	Q6P9Q4	FH1/FH2 domain-containing protein 1	Fhod1	S	502	0.227889	0.860751	-0.137427	0	1	0.992612	0.651834	0	0
Q6P6L0	Q6P6L0	Filamin A-interacting protein 1-like	Filip1l	S	1033	0.54592	0.929358	-0.009491	0.990921	1	0.979812	0.991164	0.975325	0.982842
Q6P6L0	Q6P6L0	Filamin A-interacting protein 1-like	Filip1l	S	1080	0.00217509	2.68934e-05	0.213456	0	0	1	0.846559	0.999743	0.966437
Q6P6L0	Q6P6L0	Filamin A-interacting protein 1-like	Filip1l	S	789	0.945002	0.9529	-0.00104459	0.990277	0.99618	0.993765	1	0.991013	0.992646
Q6P6L0	Q6P6L0	Filamin A-interacting protein 1-like	Filip1l	S	1047	0.0143043	0.0523894	0.22275	0.605991	0.59382	0.662703	0.939015	1	0.99094
Q6P6L0	Q6P6L0	Filamin A-interacting protein 1-like	Filip1l	T	984	0.149287	0.796664	-0.0554492	0.969255	1	0.971739	0.984623	0.958646	0.828618
Q9D824	Q9D824	Pre-mRNA 3'-end-processing factor FIP1	Fip1l1	S	235	0.0568074	0.51574	0.0717087	0.810573	0.8456	0.873905	1	0.955971	0.976287
Q9D824	Q9D824	Pre-mRNA 3'-end-processing factor FIP1	Fip1l1	S	280	0.840124	0.947468	-0.00997494	0.894978	0	0.873707	1	0.977791	0
Q9D824	Q9D824	Pre-mRNA 3'-end-processing factor FIP1	Fip1l1	S	479	0.799752	0.946671	-0.00417662	0.98205	1	0.994281	0.981193	0.976851	0.992813
Q9D824	Q9D824	Pre-mRNA 3'-end-processing factor FIP1	Fip1l1	T	481	0.481595	0.922273	0.115889	0	0	0.998662	0	1	0
Q9D824	Q9D824	Pre-mRNA 3'-end-processing factor FIP1	Fip1l1	S	479	0.230754	0.861099	0.0216329	0.959367	0.970153	0.951589	0.97725	1	0.995638
Q9D824	Q9D824	Pre-mRNA 3'-end-processing factor FIP1	Fip1l1	S	483	0.813103	0.947245	0.0194633	0.973837	0.702747	0	0.820706	0.759867	1
Q9D824	Q9D824	Pre-mRNA 3'-end-processing factor FIP1	Fip1l1	S	487	0.230754	0.861099	0.0216329	0.959367	0.970153	0.951589	0.97725	1	0.995638
Q6P9Q6	Q6P9Q6	FK506-binding protein 15	Fkbp15	S	306	0.69052	0.94034	-0.06109	1	0	0	0	0.877624	0
Q6P9Q6	Q6P9Q6	FK506-binding protein 15	Fkbp15	S	310	0.321414	0.897206	0.0548677	0	0	0.906402	1	0	0.688122
Q6P9Q6	Q6P9Q6	FK506-binding protein 15	Fkbp15	S	1157	0.419673	0.913006	0.115464	0.9991	0	1	0	0.971545	0.969978
Q6P9Q6	Q6P9Q6	FK506-binding protein 15	Fkbp15	S	1159	0.552417	0.929954	-0.0202493	0.922735	1	0.98484	0.918405	0.882553	0.97262
Q6P9Q6	Q6P9Q6	FK506-binding protein 15	Fkbp15	S	1091	0.00864648	0.0130541	0.0816822	0.813837	0.838823	0.962279	1	0.97372	0.949769
Q6P9Q6	Q6P9Q6	FK506-binding protein 15	Fkbp15	T	1093	0.388207	0.908605	-0.124061	1	0.896957	0	0.824432	0	0.997378
P26883	P26883	Peptidyl-prolyl cis-trans isomerase FKBP1A	Fkbp1a	S	9	0.645171	0.937534	0.0192172	1	0	0	0	0.925562	0.909499
Q8QZS3	Q8QZS3	Folliculin	Flcn	S	62	0.367116	0.904456	0.0367868	0.669335	0.681008	0.570947	0.587263	1	0.629749
Q8BTM8	Q8BTM8	Filamin-A	Flna	S	1084	0.955034	0.953271	-0.00165136	0.99499	1	0.98596	0.882992	0.998008	0.992038
Q8BTM8	Q8BTM8	Filamin-A	Flna	S	2152	0.677639	0.939759	-0.00635774	0.992034	1	0.982938	0.986175	0.986148	0.988012
Q8BTM8	Q8BTM8	Filamin-A	Flna	S	2128	0.708214	0.94167	-0.0197873	0.755332	1	0.781856	0.914144	0.871569	0.801219
Q8BTM8	Q8BTM8	Filamin-A	Flna	S	2327	0.423571	0.914533	-0.0127214	0.989179	1	0.981297	0.983499	0.974802	0.978145
Q8BTM8	Q8BTM8	Filamin-A	Flna	S	1010	0.594203	0.933635	0.0173936	0.965657	0.853654	0.918556	1	0.944729	0.936722
Q8BTM8	Q8BTM8	Filamin-A	Flna	S	1012	0.156483	0.805533	-0.142631	0	1	0.883783	0.866095	0	0
Q8BTM8	Q8BTM8	Filamin-A	Flna	S	966	0.0773771	0.630113	0.216105	0.784154	0	0.73351	0.720679	1	0.852316
Q8BTM8	Q8BTM8	Filamin-A	Flna	S	968	0.341661	0.898957	0.18571	0	1	0	0.893105	0.985338	0.999565
Q8BTM8	Q8BTM8	Filamin-A	Flna	S	1630	0.776836	0.945512	0.00915274	0.893185	0.998002	0.874179	0.825143	0.923755	1
Q8BTM8	Q8BTM8	Filamin-A	Flna	T	1750	0.88841	0.950672	-0.00221729	0.897304	0.913007	0.995907	1	0.906045	0.898545
Q8BTM8	Q8BTM8	Filamin-A	Flna	S	2158	0.419058	0.913891	0.0947372	0	0	0.946654	0.865939	1	0
Q8BTM8	Q8BTM8	Filamin-A	Flna	S	2180	0.603562	0.934396	0.0178415	1	0.852959	0.964995	0.988529	0.948499	0.969161
Q8BTM8	Q8BTM8	Filamin-A	Flna	S	16	0.217229	0.853768	0.0213307	0.950105	0.95949	0.986375	1	0.999384	0.985423
Q8BTM8	Q8BTM8	Filamin-A	Flna	S	20	0.633858	0.936027	-0.0431152	1	0	0	0	0.918664	0
Q8BTM8	Q8BTM8	Filamin-A	Flna	S	1459	0.130378	0.770762	-0.0270881	1	0.998971	0.957332	0.962143	0.967209	0.955122
Q8BTM8	Q8BTM8	Filamin-A	Flna	S	1518	0.441408	0.917116	-0.0213948	1	0.93186	0.8278	0.862489	0.96572	0.890547
Q80X90	Q80X90	Filamin-B	Flnb	S	2478	0.326041	0.895236	-0.0160755	0.995082	0.999565	0.993192	1	0.981357	0.972256
Q80X90	Q80X90	Filamin-B	Flnb	S	2481	0.212564	0.853105	0.068168	0	0.938801	0	0	0.922858	1
Q80X90	Q80X90	Filamin-B	Flnb	S	1505	0.722955	0.942484	-0.0329385	0.954852	0.778513	0.811001	0	0.595423	1
Q80X90	Q80X90	Filamin-B	Flnb	T	519	0.892448	0.950837	-0.00248259	0.962063	1	0.92196	0.884835	0.963812	0.98828
Q8VHX6	Q8VHX6	Filamin-C	Flnc	S	2234	0.793619	0.946363	0.0104381	0.764814	0.873373	0.974004	1	0.78794	0.880241
Q8VHX6	Q8VHX6	Filamin-C	Flnc	S	2237	0.907153	0.951431	0.00315245	0.939588	1	0.880196	0.786257	0.988603	0.962717
Q8VHX6	Q8VHX6	Filamin-C	Flnc	S	2603	0.777048	0.945522	-0.0123593	0.939048	0.956431	1	0.832801	0.895871	0.959799
Q05860	Q05860	Formin-1	Fmn1	S	842	0.400395	0.91067	-0.0368142	0.880129	0.8161	0.904852	1	0.684885	0.864519
A2APV2	A2APV2	Formin-like protein 2	Fmnl2	S	171	0.852824	0.949148	0.00365305	0.93971	0.996891	1	0.998635	0.962164	0.987525
Q6ZPF4	Q6ZPF4	Formin-like protein 3	Fmnl3	S	174	0.477755	0.921967	-0.0124445	0.9834	1	0.996176	0.984197	0.986074	0.956518
P35922	P35922	Fragile X mental retardation protein 1 homolog	Fmr1	T	462	0.419295	0.913854	-0.0138631	0.971205	1	0.983425	0.972225	0.965674	0.958681
P11276	P11276	Fibronectin;Anastellin	Fn1	S	285	0.868182	0.949819	-0.0026635	0.988685	1	0.96272	0.978746	0.98374	0.996956
P11276	P11276	Fibronectin;Anastellin	Fn1	S	2475	0.0232283	0.157687	0.0753776	0.903642	0.848389	0.920348	0.928879	0.963244	1
Q80TY0	Q80TY0	Formin-binding protein 1	Fnbp1	S	496	0.760496	0.944651	-0.0112321	1	0.849483	0.953173	0.806818	0.90861	0.889164
Q80TY0	Q80TY0	Formin-binding protein 1	Fnbp1	S	296	0.0915384	0.676962	0.0450897	0.901341	0.867052	0	0	0.949918	1
Q8K012	Q8K012	Formin-binding protein 1-like	Fnbp1l	S	489	0.208862	0.848842	-0.102404	1	0	0.939886	0	0	0
Q8K012	Q8K012	Formin-binding protein 1-like	Fnbp1l	S	501	0.0854241	0.664715	-0.127576	0.976283	1	0.809172	0	0	0.835044
Q8K012	Q8K012	Formin-binding protein 1-like	Fnbp1l	S	295	0.996161	0.954741	8.36402e-05	0.980826	0.994428	1	0.966939	0.981915	0.993598
Q8K012	Q8K012	Formin-binding protein 1-like	Fnbp1l	T	496	0.734804	0.942907	-0.0363388	0.943937	1	0	0.852228	0.979835	0.844923
Q8K012	Q8K012	Formin-binding protein 1-like	Fnbp1l	S	488	0.225041	0.85851	-0.149559	1	0.922737	0.969902	0.994786	0.962403	0
Q8K012	Q8K012	Formin-binding protein 1-like	Fnbp1l	S	489	0.0010788	1.25508e-07	0.185843	0	0	0.931429	0.977947	1	0.930311
Q8K012	Q8K012	Formin-binding protein 1-like	Fnbp1l	S	501	0.407588	0.911764	-0.1094	0.874859	0.876784	0.9216	1	0.985868	0
Q8K012	Q8K012	Formin-binding protein 1-like	Fnbp1l	T	496	0.254896	0.871981	-0.120186	1	0	0.969737	0	0	0
Q6ZQ03	Q6ZQ03	Formin-binding protein 4	Fnbp4	S	120	0.553378	0.930063	0.00942324	0.97305	0.978661	0.977933	0.986969	1	0.983556
Q6ZQ03	Q6ZQ03	Formin-binding protein 4	Fnbp4	S	19	0.643202	0.937408	-0.00707131	0.975064	0.976768	0.993569	1	0.962271	0.966482
Q6NWW9	Q6NWW9	Fibronectin type III domain-containing protein 3B	Fndc3b	S	208	0.729966	0.942958	0.00544399	0.978167	0.978758	0.986115	1	0.980608	0.991447
Q68FD7	Q68FD7	Folliculin-interacting protein 1	Fnip1	S	945	0.958375	0.953473	-0.00133528	0.922673	0.969996	0	0	0.885846	1
Q8K2I1	Q8K2I1	Protein farnesyltransferase subunit beta	Fntb	S	432	0.937512	0.952597	0.00669778	0.970746	0.962107	0	1	0.967918	0.993114
Q8K2I1	Q8K2I1	Protein farnesyltransferase subunit beta	Fntb	T	431	0.937184	0.952555	0.00669778	0.970746	0.962107	0	1	0.967918	0.993114
Q8K2I1	Q8K2I1	Protein farnesyltransferase subunit beta	Fntb	T	436	0.937971	0.952555	0.00669778	0.970746	0.962107	0	1	0.967918	0.993114
P47930	P47930	Fos-related antigen 2	Fosl2	S	120	0.743452	0.943721	0.00772752	0.900141	1	0.977468	0.993983	0.941788	0.993909
P47930	P47930	Fos-related antigen 2	Fosl2	S	200	0.66766	0.939086	-0.00930918	0.940148	0.952493	0.943131	1	0.943767	0.921233
P47930	P47930	Fos-related antigen 2	Fosl2	S	320	0.313997	0.886912	-0.0317179	0	0	1	0.9626	0	0
Q61850	Q61850	Forkhead box protein C2	Foxc2	S	218	0.0121545	0.0348246	0.109837	0.735394	0.706036	1	0.956979	0.878731	0.992128
Q61850	Q61850	Forkhead box protein C2	Foxc2	S	239	0.818938	0.946974	-0.0233815	0	0.963873	1	0	0	0.87205
Q61850	Q61850	Forkhead box protein C2	Foxc2	S	239	0.294188	0.88612	-0.0283527	1	0.89099	0.832982	0.767715	0.896645	0.858245
P42128	P42128	Forkhead box protein K1	Foxk1	S	199	0.0729505	0.609777	-0.0761308	0.923723	1	0.970638	0.840296	0.841424	0.793939
P42128	P42128	Forkhead box protein K1	Foxk1	S	431	0.368876	0.904824	0.0297179	0.809484	0.920024	1	0.995477	0.893539	0.926958
P42128	P42128	Forkhead box protein K1	Foxk1	S	406	0.0207814	0.125287	-0.0972954	1	0.985181	0.925618	0.799839	0.808483	0.808832
P42128	P42128	Forkhead box protein K1	Foxk1	S	402	0.0872212	0.666977	-0.13232	0.882909	1	0	0	0	0.825824
P42128	P42128	Forkhead box protein K1	Foxk1	S	406	0.0861048	0.661431	-0.131303	0.882909	1	0	0	0	0.825824
Q3UCQ1	Q3UCQ1	Forkhead box protein K2	Foxk2	S	24	0.30452	0.889364	-0.0174295	0.987544	1	0.969976	0.986731	0.970167	0.964018
Q3UCQ1	Q3UCQ1	Forkhead box protein K2	Foxk2	S	389	0.209141	0.849451	-0.134163	0.833577	0	1	0.76373	0	0
Q3UCQ1	Q3UCQ1	Forkhead box protein K2	Foxk2	S	415	0.417363	0.912952	-0.0915688	0.746313	0.799932	0	1	0	0.701205
Q3UCQ1	Q3UCQ1	Forkhead box protein K2	Foxk2	S	419	0.491224	0.922622	0.0575117	0.842702	0.830826	0.98881	0	1	0.915867
Q9R1E0	Q9R1E0	Forkhead box protein O1	Foxo1	S	284	0.612429	0.933796	0.0144618	0.968138	0.913154	0.897658	0	1	0.963514
Q9WVH4	Q9WVH4	Forkhead box protein O3	Foxo3	S	7	0.591244	0.933383	-0.0290084	0.976921	1	0.707804	0.956788	0.953978	0.917716
Q9WVH4	Q9WVH4	Forkhead box protein O3	Foxo3	S	298	0.210056	0.849025	-0.0368927	1	0.93991	0	0	0	0.918449
Q9WVH4	Q9WVH4	Forkhead box protein O3	Foxo3	S	299	0.207774	0.844202	-0.0370341	1	0.93991	0	0	0	0.918449
Q9WVH4	Q9WVH4	Forkhead box protein O3	Foxo3	S	7	0.285631	0.881009	-0.134328	0.976895	0	1	0	0	0
Q9WVH4	Q9WVH4	Forkhead box protein O3	Foxo3	S	12	0.275441	0.878477	-0.131612	0.976895	0	1	0	0	0
Q80T14	Q80T14	Extracellular matrix protein FRAS1	Fras1	S	1168	0.161169	0.810672	-0.0988667	0.907019	1	0	0	0	0.905116
Q8BIE6	Q8BIE6	FERM domain-containing protein 4A	Frmd4a	S	783	0.501684	0.925209	0.0865515	0	0	0	0.928747	1	0
Q8BIE6	Q8BIE6	FERM domain-containing protein 4A	Frmd4a	S	785	0.118513	0.749485	-0.0548433	1	0.991216	0.98298	0.918876	0.844241	0.951693
Q8BIE6	Q8BIE6	FERM domain-containing protein 4A	Frmd4a	S	320	0.314379	0.892541	-0.0377837	1	0.806799	0.674035	0	0.853219	0.710213
Q8BIE6	Q8BIE6	FERM domain-containing protein 4A	Frmd4a	S	679	0.697508	0.940755	-0.0318482	0.831612	0	0	1	0.909837	0.449597
Q8C0V9	Q8C0V9	FERM domain-containing protein 6	Frmd6	S	542	0.331605	0.896484	0.0445588	0.984085	0.80329	0.972874	0.860919	1	0.961277
Q8C0V9	Q8C0V9	FERM domain-containing protein 6	Frmd6	S	544	0.899339	0.951118	0.00230681	0.980879	1	0.925409	0.967621	0.994319	0.994056
Q8C0V9	Q8C0V9	FERM domain-containing protein 6	Frmd6	S	522	0.570982	0.931647	0.0215153	0.879688	0.992081	0.775391	0.931799	0.96232	1
Q8C0V9	Q8C0V9	FERM domain-containing protein 6	Frmd6	S	609	0.0275572	0.215732	-0.0598422	0.939463	1	0.893467	0.916859	0.853899	0.850299
Q8C0V9	Q8C0V9	FERM domain-containing protein 6	Frmd6	T	613	0.639466	0.936557	0.0302285	0	0	0.979718	1	0.926159	0
Q3UFK8	Q3UFK8	FERM domain-containing protein 8	Frmd8	S	409	0.486489	0.921351	0.0476089	1	0	0	0.888312	0.974984	0.922931
Q3UFK8	Q3UFK8	FERM domain-containing protein 8	Frmd8	S	440	0.937489	0.952614	-0.00281373	0.918664	0.979874	0.958355	0.864617	1	0.888586
Q3UFK8	Q3UFK8	FERM domain-containing protein 8	Frmd8	T	439	0.293929	0.886773	-0.139198	0	0.996645	0	1	0	0
Q8C180	Q8C180	Fibroblast growth factor receptor substrate 2	Frs2	S	211	0.324947	0.8948	-0.0499694	0.871148	0.975291	1	0.796667	0.819738	0.841445
Q8C180	Q8C180	Fibroblast growth factor receptor substrate 2	Frs2	S	292	0.429826	0.915171	0.0907552	0.99447	0	0.923111	0	1	0.90437
Q8C180	Q8C180	Fibroblast growth factor receptor substrate 2	Frs2	S	161	0.908941	0.950956	-0.00896877	0.625549	0.920749	0.671005	0.774312	0	1
Q8C180	Q8C180	Fibroblast growth factor receptor substrate 2	Frs2	Y	306	0.391841	0.907855	0.0885163	0	0.933504	0	1	0.933595	0.959246
Q8C180	Q8C180	Fibroblast growth factor receptor substrate 2	Frs2	Y	349	0.705451	0.941504	-0.0110496	1	0.894694	0.883714	0.861462	0.971739	0.876141
Q8C180	Q8C180	Fibroblast growth factor receptor substrate 2	Frs2	Y	471	0.101468	0.711403	0.0599719	0.900138	0	0	0	0.962695	1
Q8C180	Q8C180	Fibroblast growth factor receptor substrate 2	Frs2	S	503	0.164544	0.813773	0.0379422	0.824833	0.934964	0.956009	0.994661	0.948571	1
Q8C180	Q8C180	Fibroblast growth factor receptor substrate 2	Frs2	S	365	0.85804	0.949379	-0.00292899	0.981091	1	0.97924	0.990322	0.980751	0.99231
Q8C180	Q8C180	Fibroblast growth factor receptor substrate 2	Frs2	S	177	0.511186	0.925831	-0.0102988	1	0.99256	0.986259	0.989899	0.977688	0.985622
Q8C180	Q8C180	Fibroblast growth factor receptor substrate 2	Frs2	S	327	0.00346739	0.000356833	0.0976616	0.783293	0.776454	0.984157	1	0.919075	0.955698
Q8C180	Q8C180	Fibroblast growth factor receptor substrate 2	Frs2	S	354	0.214514	0.852067	0.0601603	0.559788	0.611197	0.964922	1	0.851741	0.598334
Q8C180	Q8C180	Fibroblast growth factor receptor substrate 2	Frs2	S	428	0.3821	0.90746	-0.0159088	0.962535	1	0.999741	0.995514	0.953343	0.958485
Q8C180	Q8C180	Fibroblast growth factor receptor substrate 2	Frs2	S	35	0.782737	0.945817	-0.00442091	0.994801	0.983035	0.990725	1	0.971218	0.991843
Q8C180	Q8C180	Fibroblast growth factor receptor substrate 2	Frs2	S	155	0.36276	0.903582	-0.0269455	0.984474	0.975618	1	0.979901	0.989698	0.86678
Q9DBE9	Q9DBE9	pre-rRNA processing protein FTSJ3	Ftsj3	S	532	0.757648	0.944499	0.00744519	0.944668	0.867149	0.927379	1	0.939409	0.904796
Q9DB70	Q9DB70	FUN14 domain-containing protein 1	Fundc1	S	13	0.189052	0.834999	0.0730665	0.84287	0.793587	0.713228	0.963839	1	0.934387
P10404;P11370	P10404	MLV-related proviral Env polyprotein;Surface protein;Transmembrane protein;Retrovirus-related Env polyprotein from Fv-4 locus	Fv4	S	639;677	0.470265	0.921039	0.0121245	0.95098	0.960167	0.986798	1	0.964234	0.992231
Q61584	Q61584	Fragile X mental retardation syndrome-related protein 1	Fxr1	S	643	0.852804	0.949141	0.0114884	1	0.795304	0.892107	0.969617	0.83548	0.997966
Q61584	Q61584	Fragile X mental retardation syndrome-related protein 1	Fxr1	S	449	0.227622	0.859406	-0.0434319	0.960541	1	0.941058	0.933738	0.970313	0.815028
Q61584	Q61584	Fragile X mental retardation syndrome-related protein 1	Fxr1	T	398	0.41947	0.913828	0.0233794	0.917044	0.950019	0.86806	0.98897	1	0.962599
Q9WVR4	Q9WVR4	Fragile X mental retardation syndrome-related protein 2	Fxr2	S	602	0.197134	0.840872	0.103433	0.970767	0.641525	0.946026	1	0.996752	0.975544
Q9WVR4	Q9WVR4	Fragile X mental retardation syndrome-related protein 2	Fxr2	T	413	0.27712	0.880489	0.0248995	0.940753	0.930256	0.888934	0.845782	0.951085	1
Q9WVR4	Q9WVR4	Fragile X mental retardation syndrome-related protein 2	Fxr2	S	602	0.0147982	0.0571559	0.180807	0.685746	0	1	0.803179	0.979682	0.964588
Q9WVR4	Q9WVR4	Fragile X mental retardation syndrome-related protein 2	Fxr2	S	604	0.124571	0.760591	0.133904	0.876936	0	1	0.803179	0.979682	0.964588
Q9WVR4	Q9WVR4	Fragile X mental retardation syndrome-related protein 2	Fxr2	T	599	0.275212	0.879994	0.089942	0.940877	0	0	0.952389	0.988732	1
P39688	P39688	Tyrosine-protein kinase Fyn	Fyn	S	21	0.795808	0.945888	-0.0341102	1	0	0.65614	0	0	0.883892
Q91Z49	Q91Z49	UAP56-interacting factor	Fyttd1	S	23	0.108762	0.729277	-0.0290784	1	0.999744	0.938426	0.943301	0.954389	0.941803
Q91Z49	Q91Z49	UAP56-interacting factor	Fyttd1	T	14	0.313541	0.891787	-0.0327699	0.99269	0.994498	1	0.835454	0.934853	0.90032
P97855	P97855	Ras GTPase-activating protein-binding protein 1	G3bp1	S	231	0.913283	0.951699	-0.0403356	0	0.997352	1	0	0.967094	0
P97855	P97855	Ras GTPase-activating protein-binding protein 1	G3bp1	S	149	0.785228	0.945944	-0.004108	0.997748	1	0.984338	0.985034	0.992373	0.99568
P97379	P97379	Ras GTPase-activating protein-binding protein 2	G3bp2	S	225	0.319823	0.893459	-0.0501302	0.971789	1	0.992862	0.896465	0.992195	0.808053
P97379	P97379	Ras GTPase-activating protein-binding protein 2	G3bp2	T	227	0.28546	0.883412	-0.0193124	0.996869	1	0.996838	0.992704	0.985387	0.956119
P97379	P97379	Ras GTPase-activating protein-binding protein 2	G3bp2	S	225	0.865062	0.94968	-0.00467911	0.956328	0.940729	1	0.910098	0.984977	0.892875
P97379	P97379	Ras GTPase-activating protein-binding protein 2	G3bp2	T	227	0.865062	0.94968	-0.00467911	0.956328	0.940729	1	0.910098	0.984977	0.892875
Q9QYY0	Q9QYY0	GRB2-associated-binding protein 1	Gab1	S	402	0.7915	0.94607	-0.0347741	0	1	0	0	0.968007	0
Q9QYY0	Q9QYY0	GRB2-associated-binding protein 1	Gab1	S	403	0.270237	0.877597	-0.125018	0.913651	1	0	0.718802	0.968007	0
Q9QYY0	Q9QYY0	GRB2-associated-binding protein 1	Gab1	S	420	0.0369553	0.334294	0.153923	0.788764	0	0	0.570926	1	0.935837
P16858	P16858	Glyceraldehyde-3-phosphate dehydrogenase	Gapdh	T	182	0.0895192	0.675864	-0.0576312	1	0.931247	0.936677	0.932421	0.837144	0.911903
Q6PAR5	Q6PAR5	GTPase-activating protein and VPS9 domain-containing protein 1	Gapvd1	S	1085	0.289985	0.884407	-0.112261	0.984443	0.940595	0	0	0	1
Q6PAR5	Q6PAR5	GTPase-activating protein and VPS9 domain-containing protein 1	Gapvd1	S	746	0.431132	0.912271	0.0244252	0	0	1	0.999011	0	0.949526
Q6PAR5	Q6PAR5	GTPase-activating protein and VPS9 domain-containing protein 1	Gapvd1	S	902	0.104097	0.717715	0.0592125	0.937014	0.846586	0.858315	0.785126	0.97722	1
Q6PAR5	Q6PAR5	GTPase-activating protein and VPS9 domain-containing protein 1	Gapvd1	S	758	0.310431	0.891103	-0.112851	0	0.899597	1	0	0	0
Q6PAR5	Q6PAR5	GTPase-activating protein and VPS9 domain-containing protein 1	Gapvd1	S	766	0.357277	0.902388	-0.0666231	1	0.854204	0.929464	0.950329	0.958655	0.639435
Q64737	Q64737	Trifunctional purine biosynthetic protein adenosine-3;Phosphoribosylamine--glycine ligase;Phosphoribosylformylglycinamidine cyclo-ligase;Phosphoribosylglycinamide formyltransferase	Gart	S	467	0.138124	0.782009	-0.0448038	1	0.936299	0.759913	0.886634	0.834487	0.875186
Q8JZP9	Q8JZP9	GAS2-like protein 1	Gas2l1	S	493	0.355154	0.902061	-0.0150299	0.986323	1	0.988704	0.978573	0.964999	0.967687
Q8CHY6	Q8CHY6	Transcriptional repressor p66 alpha	Gatad2a	T	185	0.170915	0.820512	-0.0920977	0.977481	0.890678	0.968773	1	0	0.897752
Q8CHY6	Q8CHY6	Transcriptional repressor p66 alpha	Gatad2a	S	96	0.154289	0.802575	0.0566987	0.966635	0.83905	0.871237	0.841499	1	0.980796
Q8CHY6	Q8CHY6	Transcriptional repressor p66 alpha	Gatad2a	S	103	0.00447775	0.00117608	0.101556	0.841921	0.825226	0.860909	0.814468	1	0.980796
Q8CHY6	Q8CHY6	Transcriptional repressor p66 alpha	Gatad2a	S	109	0.738676	0.943452	0.0124934	0.913309	0.870776	0.786269	1	0.912827	0.929826
Q8CHY6	Q8CHY6	Transcriptional repressor p66 alpha	Gatad2a	S	96	0.030749	0.257563	0.0612913	0.886936	0.867589	0.907451	0.97492	0.98605	1
Q8CHY6	Q8CHY6	Transcriptional repressor p66 alpha	Gatad2a	S	103	0.0107679	0.0245561	0.182214	0	0.671907	0.874695	1	0.972717	0.906487
Q8CHY6	Q8CHY6	Transcriptional repressor p66 alpha	Gatad2a	S	105	0.873501	0.95004	-0.00977493	0.946443	0.862141	0.733521	0.951071	0.769182	1
Q8CHY6	Q8CHY6	Transcriptional repressor p66 alpha	Gatad2a	S	109	0.836461	0.948407	-0.00977493	0.946443	0.862141	0.909972	0.882075	0.769182	1
Q8CHY6	Q8CHY6	Transcriptional repressor p66 alpha	Gatad2a	S	110	0.0265619	0.202394	0.166229	0	0.690753	0.724862	0.867396	1	0.856496
Q8VHR5	Q8VHR5	Transcriptional repressor p66-beta	Gatad2b	S	123	0.253473	0.871138	-0.129143	1	0.825179	0.835709	0.897698	0.918482	0
Q8VHR5	Q8VHR5	Transcriptional repressor p66-beta	Gatad2b	S	130	0.410498	0.912359	-0.0541749	1	0.883685	0.800094	0.713697	0.987165	0.672335
Q8VHR5	Q8VHR5	Transcriptional repressor p66-beta	Gatad2b	S	335	0.106074	0.719395	-0.083466	0.945584	1	0	0.728488	0.824172	0.77846
Q8VHR5	Q8VHR5	Transcriptional repressor p66-beta	Gatad2b	S	123	0.520301	0.92568	0.0453309	0.814855	0.938092	0.871709	0	1	0.938945
Q8VHR5	Q8VHR5	Transcriptional repressor p66-beta	Gatad2b	S	130	0.343973	0.898945	-0.0668906	0.929157	0.981599	0	0	0	1
Q8VHR5	Q8VHR5	Transcriptional repressor p66-beta	Gatad2b	T	121	0.458437	0.919265	0.0514599	0.814855	0.938092	0.871709	0	1	0.964092
Q9D4H2	Q9D4H2	GRIP and coiled-coil domain-containing protein 1	Gcc1	S	620	0.0111526	0.0276965	0.0884603	0.796463	0.843009	0.948319	0.964375	0.943985	1
Q8BKT3	Q8BKT3	GC-rich sequence DNA-binding factor 2	Gcfc2	S	169	0.159322	0.808384	0.0334624	0.920241	0.935494	0.891448	0.967787	0.988701	1
Q9CQQ4	Q9CQQ4	Gem-associated protein 2	Gemin2	S	70	0.578692	0.932091	0.0479551	0	0.986765	0.893594	0	1	0.81004
Q9CWY4	Q9CWY4	Gem-associated protein 7	Gemin7	S	3	0.219018	0.854796	-0.0215274	1	0.985862	0.933707	0.957711	0.945456	0.953014
Q8BHE1	Q8BHE1	Gem-associated protein 8	Gemin8	S	181	0.986931	0.95442	0.000245171	1	0.997126	0.999655	0.998465	0.999837	0.998153
P47856	P47856	Glutamine--fructose-6-phosphate aminotransferase [isomerizing] 1	Gfpt1	S	259	0.211869	0.850532	-0.263551	0.943852	0.957401	0.959095	1	0	0.94504
P47856	P47856	Glutamine--fructose-6-phosphate aminotransferase [isomerizing] 1	Gfpt1	T	260	0.318204	0.893042	-0.0383015	1	0.911492	0.845804	0.854004	0.871394	0.94258
Q9Z2Z9	Q9Z2Z9	Glutamine--fructose-6-phosphate aminotransferase [isomerizing] 2	Gfpt2	S	244	0.028594	0.229631	0.0551879	0.838224	0.881634	0.760901	0.77665	1	0.962414
Q8R0H9	Q8R0H9	ADP-ribosylation factor-binding protein GGA1	Gga1	S	267	0.00738128	0.00788765	0.075989	0.867977	0.838527	0.864612	0.881757	0.985161	1
Q8R0H9	Q8R0H9	ADP-ribosylation factor-binding protein GGA1	Gga1	T	269	0.335262	0.898074	-0.0707026	1	0.683864	0	0	0	0.807723
Q5SV77	Q5SV77	Gametogenetin-binding protein 2	Ggnbp2	S	360	0.24	0.86547	-0.0334732	1	0.980872	0.887081	0.938282	0.974806	0.867065
[truncated: 4,556 more rows]

## Sheet: sig_INSvsBSA_log_filter
proteins	protein	prot_name	gene	aa	pos	pval	padjval	fc	BSA_1	BSA_2	INS_1	INS_2	ISM1_1	ISM1_2
Q8K039	Q8K039	Uncharacterized protein KIAA1143 homolog	1110059G10Rik	S	50	0.650047	0.928495	-0.00781857	1	0.991667	0.968383	1	0.99234	0.997187
Q3TEI4	Q3TEI4	Uncharacterized protein C15orf39 homolog	1700017B05Rik	S	493	0.0998242	0.686346	-0.123998	0.964739	1	0.894597	0	0.860903	0.878928
Q3TEI4	Q3TEI4	Uncharacterized protein C15orf39 homolog	1700017B05Rik	S	494	0.0999914	0.689176	-0.124141	0.964739	1	0.894597	0	0.860903	0.878928
Q8K207	Q8K207	Uncharacterized protein C1orf21 homolog	1700025G04Rik	S	93	0.349889	0.887959	-0.108151	0	1	0	0	0.875535	0
Q8K207	Q8K207	Uncharacterized protein C1orf21 homolog	1700025G04Rik	S	95	0.536925	0.918072	0.0372507	0.912288	0.888267	1	0.952818	0	0.822391
Q8K207	Q8K207	Uncharacterized protein C1orf21 homolog	1700025G04Rik	S	115	0.846912	0.940754	0.00318375	0.980766	0.9759	0.989389	0.977962	1	0.970955
Q922C1	Q922C1	Uncharacterized protein C19orf44 homolog	1700030K09Rik	S	196	0.205217	0.831421	-0.0625272	0	1	0	0	0.875493	0.951816
Q99M08	Q99M08	Uncharacterized protein C4orf3 homolog	1810037I17Rik	S	19	0.172932	0.803994	0.0721926	0.811363	0.773665	0.814759	1	0.817488	0.778822
Q8C3W1	Q8C3W1	Uncharacterized protein C1orf198 homolog	2310022B05Rik	S	176	0.525805	0.916335	-0.125778	0.924042	0.848503	0.969082	0	0	1
Q9CWU4	Q9CWU4	UPF0690 protein C1orf52 homolog	2410004B18Rik	S	156	0.644866	0.928072	0.00734442	0.984275	0.982227	0.985445	1	0.981243	0.990058
Q8CIL4	Q8CIL4	Uncharacterized protein C1orf131 homolog	2810004N23Rik	S	7	0.42988	0.90385	0.0172348	1	0.930383	0.991505	0.99886	0.970247	0.97072
Q8CIL4	Q8CIL4	Uncharacterized protein C1orf131 homolog	2810004N23Rik	S	9	0.0109056	0.0277059	-0.117372	0.921095	1	0	0	0	0
Q8CIL4	Q8CIL4	Uncharacterized protein C1orf131 homolog	2810004N23Rik	S	67	0.41425	0.901141	0.0159849	0.957962	0.942734	1	0.954643	0.98362	0.962692
Q8CIL4	Q8CIL4	Uncharacterized protein C1orf131 homolog	2810004N23Rik	S	106	0.185105	0.815334	0.099365	0	0.873969	1	0.980278	0.851831	0
Q9CXL3	Q9CXL3	Uncharacterized protein C7orf50 homolog	3110082I17Rik	S	177	0.341742	0.888096	-0.14264	0.968749	0	0	0	0	1
Q9CXL3	Q9CXL3	Uncharacterized protein C7orf50 homolog	3110082I17Rik	S	180	0.367528	0.891639	-0.136648	0.968749	0	0	0	0	1
Q9CXL3	Q9CXL3	Uncharacterized protein C7orf50 homolog	3110082I17Rik	S	48	0.75369	0.935653	-0.0106166	0.979728	0.884661	0.876178	0.956218	0.998187	1
Q9Z2Q6	Q9Z2Q6	Septin5	44079	S	225	0.235826	0.847785	-0.0196168	1	0.994959	0.970851	0.97472	0.988749	0.988427
Q9Z2Q6	Q9Z2Q6	Septin5	44079	S	327	0.764127	0.936246	0.00506073	0.986379	0.980866	0.984327	1	0.940143	0.971084
Q8K2W9	Q8K2W9	Uncharacterized protein C14orf93 homolog	4931414P19Rik	S	226	0.607693	0.924851	0.0371094	0.89599	0	1	0.796999	0.950208	0
Q8C5V8	Q8C5V8	NA	4932418E24Rik	T	2	0.255072	0.857056	0.05727	0.80702	0.949945	0.959542	0.961685	1	0.905216
Q8C5V8	Q8C5V8	NA	4932418E24Rik	T	3	0.364557	0.892229	0.192068	0	0.977923	1	0.94152	0	0.943383
Q3UE31	Q3UE31	Uncharacterized protein KIAA0930 homolog	5031439G07Rik	S	324	0.573282	0.921805	-0.0092614	1	0.985146	0.971563	0.983707	0.987774	0.969503
Q3UE31	Q3UE31	Uncharacterized protein KIAA0930 homolog	5031439G07Rik	S	362	0.0387174	0.338339	-0.127055	0.898824	0.982365	0	0	0.737085	1
Q3UE31	Q3UE31	Uncharacterized protein KIAA0930 homolog	5031439G07Rik	T	293	0.625598	0.926611	0.0183484	0.922294	1	0.992556	0.993422	0.94125	0.800225
Q8BH50	Q8BH50	Uncharacterized protein C18orf25 homolog	8030462N17Rik	S	66	0.153877	0.783741	-0.0603017	0.900081	1	0.869148	0.831297	0.854837	0.963919
Q8BH50	Q8BH50	Uncharacterized protein C18orf25 homolog	8030462N17Rik	S	67	0.319564	0.880985	0.123931	0.943335	0	0.814857	1	0.918219	0.800969
P41233	P41233	ATP-binding cassette sub-family A member 1	Abca1	S	1296	0.36689	0.893507	-0.0741823	0.9589	0	0	0	0	1
O35379	O35379	Multidrug resistance-associated protein 1	Abcc1	S	289	0.632522	0.92711	-0.00881949	0.992058	0.996983	0.965696	1	0.946465	0.960679
O35379	O35379	Multidrug resistance-associated protein 1	Abcc1	S	290	0.232746	0.847679	-0.132359	0.73861	1	0	0.832999	0	0
O35379	O35379	Multidrug resistance-associated protein 1	Abcc1	S	882	0.824557	0.940672	0.0138961	0.826156	0	0	0.945127	1	0.621863
Q9R1X5	Q9R1X5	Multidrug resistance-associated protein 5	Abcc5	S	509	0.187289	0.816444	0.0247534	0.92542	0.917543	1	0.958625	0.850352	0.872538
Q6P542	Q6P542	ATP-binding cassette sub-family F member 1	Abcf1	S	138	0.983431	0.94684	-0.000529817	0.997722	0.94594	0.951453	0.990562	0.940533	1
Q6P542	Q6P542	ATP-binding cassette sub-family F member 1	Abcf1	S	225	0.935471	0.94486	-0.00151431	0.974733	0.995267	0.995757	0.970086	0.973491	1
Q6P542	Q6P542	ATP-binding cassette sub-family F member 1	Abcf1	S	613	0.995346	0.947308	-0.000453354	0.782151	1	0.864427	0.915856	0	0.880547
Q6P542	Q6P542	ATP-binding cassette sub-family F member 1	Abcf1	S	103	0.805014	0.938593	-0.0110528	0.917852	1	0.891937	0.994842	0.891357	0.985372
Q6P542	Q6P542	ATP-binding cassette sub-family F member 1	Abcf1	S	107	0.945482	0.945283	-0.00103683	0.998504	0.996529	0.992543	1	0.99124	0.994245
Q6P542	Q6P542	ATP-binding cassette sub-family F member 1	Abcf1	S	103	0.628986	0.926876	-0.0132635	0.982906	0.905572	0.885513	0.955595	1	0.964621
Q6P542	Q6P542	ATP-binding cassette sub-family F member 1	Abcf1	S	107	0.628986	0.926876	-0.0132635	0.982906	0.905572	0.885513	0.955595	1	0.964621
Q7TMS5	Q7TMS5	ATP-binding cassette sub-family G member 2	Abcg2	S	13	0.0415444	0.370534	-0.0409651	0.999995	1	0.924985	0.918294	0.941387	0.940635
Q8CBW3	Q8CBW3	Abl interactor 1	Abi1	S	296	0.719069	0.935607	-0.0146487	0.984096	0.72467	0	0	1	0
Q8CBW3	Q8CBW3	Abl interactor 1	Abi1	S	222	0.670001	0.93004	-0.00830518	0.932747	0.997243	0.944394	0.952108	1	0.98326
P62484	P62484	Abl interactor 2	Abi2	S	301	0.438048	0.906374	-0.0734928	0.886623	0.917898	0	1	0.88117	0.967228
Q4JIM5	Q4JIM5	Abelson tyrosine-protein kinase 2	Abl2	S	632	0.0548333	0.484217	-0.0659851	0.95406	1	0.880271	0.860142	0.861925	0.945373
Q4JIM5	Q4JIM5	Abelson tyrosine-protein kinase 2	Abl2	S	936	0.0114085	0.028472	0.157335	0	0	0.974343	1	0	0.79017
Q8K4G5	Q8K4G5	Actin-binding LIM protein 1	Ablim1	S	215	0.403226	0.90111	-0.0731661	1	0	0	0.70809	0	0
Q8K4G5	Q8K4G5	Actin-binding LIM protein 1	Ablim1	S	670	0.856618	0.941256	0.0107157	0.960664	0.990529	0.995755	1	0.982517	0.657743
Q8K4G5	Q8K4G5	Actin-binding LIM protein 1	Ablim1	S	671	0.0310392	0.254126	0.0467647	0.89981	0.920298	1	0.997886	0.960835	0.971019
Q8K4G5	Q8K4G5	Actin-binding LIM protein 1	Ablim1	S	496	0.345933	0.887825	-0.106868	0.963774	0	0	0	0	1
Q8K4G5	Q8K4G5	Actin-binding LIM protein 1	Ablim1	S	475	0.926384	0.944464	0.00142552	0.988515	0.979426	0.979765	0.992466	1	0.999865
Q5SWU9	Q5SWU9	Acetyl-CoA carboxylase 1;Biotin carboxylase	Acaca	S	23	0.332085	0.8847	-0.149175	0.994887	1	0	0.952773	0.996421	0
Q5SWU9	Q5SWU9	Acetyl-CoA carboxylase 1;Biotin carboxylase	Acaca	S	25	0.386638	0.8963	0.111484	0	0	1	0	0	0.983448
Q5SWU9	Q5SWU9	Acetyl-CoA carboxylase 1;Biotin carboxylase	Acaca	S	29	0.213554	0.835199	-0.02369	0.993854	1	0.977425	0.949057	0.991788	0.97634
Q5SWU9	Q5SWU9	Acetyl-CoA carboxylase 1;Biotin carboxylase	Acaca	S	79	0.247444	0.853583	-0.082483	1	0.943353	0.958984	0.742785	0.960851	0.838825
Q5SWU9	Q5SWU9	Acetyl-CoA carboxylase 1;Biotin carboxylase	Acaca	S	23	0.523998	0.916689	0.0140426	0.905456	0.964396	0.939429	0.978277	0.986511	1
Q5SWU9	Q5SWU9	Acetyl-CoA carboxylase 1;Biotin carboxylase	Acaca	S	25	0.435716	0.905476	-0.0428538	0.717407	0	0	0	1	0.738162
Q5SWU9	Q5SWU9	Acetyl-CoA carboxylase 1;Biotin carboxylase	Acaca	S	29	0.624327	0.926451	0.00985761	0.919718	0.964396	0.939429	0.978277	0.986511	1
Q5SWU9	Q5SWU9	Acetyl-CoA carboxylase 1;Biotin carboxylase	Acaca	S	1258	0.900103	0.943531	-0.0231744	0	0.987965	0	0.937415	1	0.953464
Q5SWU9	Q5SWU9	Acetyl-CoA carboxylase 1;Biotin carboxylase	Acaca	S	1262	0.899996	0.94335	-0.0233462	0	0.987965	0	0.937415	1	0.953464
Q5XG73	Q5XG73	Acyl-CoA-binding domain-containing protein 5	Acbd5	S	421	0.880892	0.94242	-0.00679972	0.921829	0.934581	0.823254	1	0.992822	0.768708
Q5XG73	Q5XG73	Acyl-CoA-binding domain-containing protein 5	Acbd5	S	418	0.880892	0.94242	-0.00679972	0.921829	0.934581	0.823254	1	0.992822	0.768708
Q9JIX8	Q9JIX8	Apoptotic chromatin condensation inducer in the nucleus	Acin1	S	413	0.220018	0.839108	-0.0253149	0.98519	1	0.974549	0.9277	0.965865	0.955969
Q9JIX8	Q9JIX8	Apoptotic chromatin condensation inducer in the nucleus	Acin1	S	838	0.820947	0.939425	0.00423072	0.954483	1	0.981349	0.986065	0.990068	0.998662
Q9JIX8	Q9JIX8	Apoptotic chromatin condensation inducer in the nucleus	Acin1	S	1003	0.374919	0.893607	0.0185344	0.92324	0.91343	0.963289	0.924947	0.970016	1
Q9JIX8	Q9JIX8	Apoptotic chromatin condensation inducer in the nucleus	Acin1	T	417	0.508619	0.916552	-0.0696341	0.828021	0	0	0	1	0
Q9JIX8	Q9JIX8	Apoptotic chromatin condensation inducer in the nucleus	Acin1	T	840	0.642487	0.927372	-0.00594387	1	0	0.995191	0	0	0
Q9JIX8	Q9JIX8	Apoptotic chromatin condensation inducer in the nucleus	Acin1	S	479	0.34308	0.886705	-0.112662	0.889825	0.822084	0	0.917936	1	0.942798
Q9JIX8	Q9JIX8	Apoptotic chromatin condensation inducer in the nucleus	Acin1	S	491	0.45468	0.908037	-0.095692	0.889825	0.822084	0	0.973178	1	0.942798
Q9JIX8	Q9JIX8	Apoptotic chromatin condensation inducer in the nucleus	Acin1	S	387	0.113148	0.721758	-0.200422	0.986035	0.998278	0	0.645768	1	0
Q9JIX8	Q9JIX8	Apoptotic chromatin condensation inducer in the nucleus	Acin1	S	389	0.110689	0.713461	-0.201815	0.986035	0.998278	0	0.645768	1	0
Q9JIX8	Q9JIX8	Apoptotic chromatin condensation inducer in the nucleus	Acin1	S	391	0.107177	0.705073	-0.20116	0.986035	0.998278	0	0.645768	1	0
Q9JIX8	Q9JIX8	Apoptotic chromatin condensation inducer in the nucleus	Acin1	S	710	0.414477	0.9013	0.0206778	0.937779	0.912788	1	0.921612	0.906033	0.869899
Q9JIX8	Q9JIX8	Apoptotic chromatin condensation inducer in the nucleus	Acin1	S	729	0.685369	0.930961	0.0838475	0	0.716416	0	0.98278	0.693127	1
Q9JIX8	Q9JIX8	Apoptotic chromatin condensation inducer in the nucleus	Acin1	S	479	0.609903	0.925172	0.00796583	0.985542	0.992092	1	0.999757	0.985933	0.997465
Q9JIX8	Q9JIX8	Apoptotic chromatin condensation inducer in the nucleus	Acin1	S	491	0.338887	0.885218	0.0170359	0.960688	0.911863	0.976963	0.976333	0.993351	1
Q9JIX8	Q9JIX8	Apoptotic chromatin condensation inducer in the nucleus	Acin1	S	387	0.867697	0.942126	0.0249458	0	0.855023	0	0.954515	0	1
Q9JIX8	Q9JIX8	Apoptotic chromatin condensation inducer in the nucleus	Acin1	S	389	0.821747	0.939456	0.00343022	0.986453	0.995573	1	0.993227	0.983803	0.986638
Q9JIX8	Q9JIX8	Apoptotic chromatin condensation inducer in the nucleus	Acin1	S	216	0.308466	0.878764	0.138631	0	0	0	0.992357	0.689409	1
P56485	P56485	Atypical chemokine receptor 3	Ackr3	S	347	0.421968	0.902566	0.0818644	1	0.627313	0.918394	0.9732	0.749501	0.950387
P56485	P56485	Atypical chemokine receptor 3	Ackr3	S	350	0.852994	0.941067	-0.00403959	0.981799	1	0.981026	0.986035	0.918403	0.995088
P56485	P56485	Atypical chemokine receptor 3	Ackr3	T	352	0.846362	0.941447	-0.0268175	0	0.971069	0	0.894384	0	1
Q91V92	Q91V92	ATP-citrate synthase	Acly	S	455	0.052849	0.469166	0.0422631	0.940513	0.917776	1	0.990334	0.951307	0.972853
O55137;Q9QYR7;Q32Q92;Q8BWN8;Q6Q2Z6	O55137	Acyl-coenzyme A thioesterase 1;Acyl-coenzyme A thioesterase 3;Acyl-coenzyme A thioesterase 6;Acyl-coenzyme A thioesterase 4;Acyl-coenzyme A thioesterase 5	Acot1;Acot3;Acot6;Acot4;Acot5	S	56;67;56;56;56	0.146754	0.774757	-0.0264359	0.989087	1	0.949102	0.959639	0.933194	0.948014
O55137	O55137	Acyl-coenzyme A thioesterase 1	Acot1	S	416	0.0414226	0.369581	-0.0795758	1	0.895408	0.836955	0.777553	0.812978	0.801962
Q8VHQ9	Q8VHQ9	Acyl-coenzyme A thioesterase 11	Acot11	T	323	0.0651074	0.549871	0.0754083	0.797351	0.887427	1	0.918885	0.920219	0.930106
Q9QXG4	Q9QXG4	Acetyl-coenzyme A synthetase, cytoplasmic	Acss2	S	263	0.0760655	0.604207	-0.0426781	0.966845	1	0.926618	0.884725	0.944787	0.914655
Q9QXG4	Q9QXG4	Acetyl-coenzyme A synthetase, cytoplasmic	Acss2	S	267	0.00167891	1.00814e-05	-0.186617	0.98441	1	0	0	0	0
Q9QXG4	Q9QXG4	Acetyl-coenzyme A synthetase, cytoplasmic	Acss2	S	30	0.0737477	0.593776	-0.0586117	1	0.985693	0.940393	0.840446	0.974173	0.996441
P60710;P63260	P63260	Actin, cytoplasmic 1;Actin, cytoplasmic 1, N-terminally processed;Actin, cytoplasmic 2;Actin, cytoplasmic 2, N-terminally processed	Actb;Actg1	S	232;232	0.725599	0.934179	0.0368048	0.803313	0	0	0.994325	1	0.677732
P60710;P63260	P63260	Actin, cytoplasmic 1;Actin, cytoplasmic 1, N-terminally processed;Actin, cytoplasmic 2;Actin, cytoplasmic 2, N-terminally processed	Actb;Actg1	S	233;233	0.200608	0.826659	-0.0876978	1	0.99356	0.979152	0.683228	0.889916	0.974666
P60710;P63260	P63260	Actin, cytoplasmic 1;Actin, cytoplasmic 1, N-terminally processed;Actin, cytoplasmic 2;Actin, cytoplasmic 2, N-terminally processed	Actb;Actg1	S	234;234	0.308017	0.879601	-0.043992	0	1	0	0	0	0.932313
O88990;P57780;Q9JI91;Q7TPR4	P57780	Alpha-actinin-3;Alpha-actinin-4;Alpha-actinin-2;Alpha-actinin-1	Actn3;Actn4;Actn2;Actn1	S	153;160;147;140	0.732818	0.934334	0.0063024	0.987822	0.972775	0.979619	1	0.923436	0.959171
Q9QZB7	Q9QZB7	Actin-related protein 10	Actr10	S	414	0.943055	0.945189	-0.00804819	0.921776	1	0.970446	0.917077	0.959076	0.315212
Q9Z0F8	Q9Z0F8	Disintegrin and metalloproteinase domain-containing protein 17	Adam17	S	794	0.896745	0.943144	-0.00233239	0.98588	0.999016	1	0.977923	0.956811	0.988402
Q9Z0F8	Q9Z0F8	Disintegrin and metalloproteinase domain-containing protein 17	Adam17	T	735	0.0128154	0.0414417	0.112496	0.759475	0	0.992655	1	0	0
Q811B3	Q811B3	A disintegrin and metalloproteinase with thrombospondin motifs 12	Adamts12	Y	620	0.327388	0.883841	-0.0960927	1	0.868885	0.899169	0	0.848014	0
P59509	P59509	A disintegrin and metalloproteinase with thrombospondin motifs 19	Adamts19	T	8	0.318473	0.88088	-0.108862	1	0.495962	0	0.555422	0.184838	0
Q01341	Q01341	Adenylate cyclase type 6	Adcy6	S	573	0.061442	0.528233	-0.0823922	1	0.837506	0.777388	0.73117	0.691295	0.670509
Q01341	Q01341	Adenylate cyclase type 6	Adcy6	S	53	0.15212	0.781685	0.0394851	0.892427	0.91991	0.941366	1	0.954172	0.900678
P51829	P51829	Adenylate cyclase type 7	Adcy7	S	516	0.408481	0.903923	0.0534255	0	0	1	0	0	0.967423
P51829	P51829	Adenylate cyclase type 7	Adcy7	T	513	0.405887	0.902862	0.0534702	0	0	1	0	0	0.967423
Q9QYC0	Q9QYC0	Alpha-adducin	Add1	S	12	0.0540953	0.478383	0.0377591	0.929719	0.93909	0.995059	1	0.915685	0.914539
Q9QYC0	Q9QYC0	Alpha-adducin	Add1	S	586	0.706523	0.932633	0.00896678	0.949052	0.971087	1	0.958943	0.236287	0.138611
Q9QYC0	Q9QYC0	Alpha-adducin	Add1	S	436	0.30703	0.876238	-0.0346114	0.999906	1	0.962691	0.93086	0.951866	0.83904
Q9QYC0	Q9QYC0	Alpha-adducin	Add1	T	610	0.562193	0.921254	0.0663159	0.954399	0	0.815216	0.815763	0.872423	1
Q9QYC0	Q9QYC0	Alpha-adducin	Add1	S	613	0.387157	0.89615	0.040876	0.836821	0.803804	0.795696	0.991214	1	0.937234
Q9QYC0	Q9QYC0	Alpha-adducin	Add1	T	610	0.171848	0.803238	0.133054	0.844239	0	0.802749	1	0.913796	0.872624
Q9QYC0	Q9QYC0	Alpha-adducin	Add1	T	614	0.621199	0.926794	-0.0588122	0.836821	0.803804	0	0.991214	1	0.864957
Q9QYB5	Q9QYB5	Gamma-adducin	Add3	S	681	0.269588	0.863151	0.0291029	0.91329	0.815182	0.929858	0.909695	1	0.998596
Q9QYB5	Q9QYB5	Gamma-adducin	Add3	T	11	0.260742	0.859509	-0.054485	1	0.953314	0.966943	0.725794	0.825258	0.948278
Q9Z103	Q9Z103	Activity-dependent neuroprotector homeobox protein	Adnp	S	904	0.270239	0.864462	0.0592105	0.997764	0	0.977638	1	0.944922	0.866107
P46664	P46664	Adenylosuccinate synthetase isozyme 2	Adss	S	2	0.184773	0.816596	-0.0905839	0.847809	0.886259	0.820064	0	1	0.824348
P46664	P46664	Adenylosuccinate synthetase isozyme 2	Adss	S	4	0.460329	0.908306	0.0593885	0	0	0	0.936444	0	1
Q9Z248	Q9Z248	Zinc finger protein AEBP2	Aebp2	S	199	0.626973	0.926719	-0.0304631	0.878122	1	0.977147	0.763359	0.97208	0.695072
Q80YS6	Q80YS6	Actin filament-associated protein 1	Afap1	S	283	0.69582	0.932672	-0.00858907	0.945868	0.977899	1	0	0	0
Q80YS6	Q80YS6	Actin filament-associated protein 1	Afap1	S	666	0.295923	0.874455	0.110917	0	0	0	0.882229	1	0.827162
Q80YS6	Q80YS6	Actin filament-associated protein 1	Afap1	S	669	0.224488	0.843643	-0.127948	1	0.903923	0.945616	0	0	0
Q9ESC8	Q9ESC8	AF4/FMR2 family member 4	Aff4	S	1055	0.107077	0.70736	-0.101731	0.996093	1	0.908619	0	0	0
Q9ESC8	Q9ESC8	AF4/FMR2 family member 4	Aff4	S	1040	0.693747	0.931742	0.00755261	0.951633	0.894342	0.95844	0.920473	0.98704	1
Q80WT5	Q80WT5	Aftiphilin	Aftph	S	151	0.908107	0.943654	0.001755	0.999524	0.987074	0.997079	0.995565	0.997479	1
Q8BXK8	Q8BXK8	Arf-GAP with GTPase, ANK repeat and PH domain-containing protein 1	Agap1	T	836	0.203225	0.828617	-0.0376141	1	0.910749	0.829113	0.874374	0.70561	0
Q8CDK2	Q8CDK2	Cytosolic carboxypeptidase 2	Agbl2	S	730	0.972359	0.946427	-0.00497646	0.93095	0.938845	1	0.854445	0	0.971175
Q8CDK2	Q8CDK2	Cytosolic carboxypeptidase 2	Agbl2	Y	727	0.942944	0.945184	-0.00497646	0.93095	0.938845	1	0.854445	0.724174	0.971175
Q8K2K6	Q8K2K6	Arf-GAP domain and FG repeat-containing protein 1	Agfg1	S	181	0.675308	0.930453	0.0111859	0.980901	0.973923	0.990899	1	0.875225	0.970664
Q8K2K6	Q8K2K6	Arf-GAP domain and FG repeat-containing protein 1	Agfg1	T	323	0.337241	0.885029	-0.0374256	0.968185	0	0.737234	0	1	0.815102
Q8CJG0	Q8CJG0	Protein argonaute-2	Ago2	S	11	0.785294	0.938063	-0.00408158	1	0	0.849959	0.862271	0	0.67838
Q8CJG0	Q8CJG0	Protein argonaute-2	Ago2	S	386	0.555689	0.920422	-0.0609002	0.741206	0	0	0	0	1
Q8CJG0	Q8CJG0	Protein argonaute-2	Ago2	S	388	0.163289	0.794345	0.0485766	0.932069	0.83296	0.938193	0.999063	1	0.943327
Q8C0N2	Q8C0N2	Glycerol-3-phosphate acyltransferase 3	Agpat9	S	68	0.869294	0.941869	-0.00661796	1	0.742561	0.871833	0.83685	0.897593	0.92501
Q8C0I1	Q8C0I1	Alkyldihydroxyacetonephosphate synthase, peroxisomal	Agps	S	57	0.185192	0.81891	-0.0945216	0.888901	1	0	0.868204	0	0.833327
Q641K1	Q641K1	Cytosolic carboxypeptidase 1	Agtpbp1	S	319	0.3543	0.889	-0.0372322	1	0.89408	0.903927	0.905143	0.886906	0.860515
Q8CJF7	Q8CJF7	Protein ELYS	Ahctf1	S	528	0.393735	0.897512	0.0225631	0.918132	0.932539	0.95338	0.980974	0.901662	1
Q8CJF7	Q8CJF7	Protein ELYS	Ahctf1	S	1507	0.389631	0.897399	-0.0836784	0.888187	0.949108	1	0	0.90153	0.929289
Q8CJF7	Q8CJF7	Protein ELYS	Ahctf1	S	2185	0.729351	0.93476	0.0367267	0	0.839623	1	0	0	0
Q8CJF7	Q8CJF7	Protein ELYS	Ahctf1	S	2188	0.475694	0.912657	-0.0114543	0	0	0	0	1	0.933432
Q8CJF7	Q8CJF7	Protein ELYS	Ahctf1	S	1138	0.91216	0.943838	0.00182556	0.984196	0.983137	0.993284	0.980115	1	0.970649
Q8CJF7	Q8CJF7	Protein ELYS	Ahctf1	S	1541	0.198039	0.824823	-0.0822789	1	0.921564	0.941066	0.609376	0.798924	0.807989
Q8CJF7	Q8CJF7	Protein ELYS	Ahctf1	S	1218	0.63997	0.927703	-0.00826004	0.965976	0.938202	0.935421	0.941283	0.970896	1
Q8CJF7	Q8CJF7	Protein ELYS	Ahctf1	T	1224	0.331692	0.883343	0.0165722	0.959364	0.971958	1	0.990467	0.965664	0.989269
Q6PAL7	Q6PAL7	AT-hook DNA-binding motif-containing protein 1	Ahdc1	S	99	0.650311	0.928994	0.00912953	0.960869	0	1	0.889047	0	0.919609
Q6PAL7	Q6PAL7	AT-hook DNA-binding motif-containing protein 1	Ahdc1	S	1540	0.039931	0.354482	0.0467144	0.912508	0.892182	0.991301	1	0.910058	0.873192
Q6PAL7	Q6PAL7	AT-hook DNA-binding motif-containing protein 1	Ahdc1	S	842	0.345203	0.886808	0.03343	0.948635	0.822048	0.921145	1	0.85878	0.96657
Q6PAL7	Q6PAL7	AT-hook DNA-binding motif-containing protein 1	Ahdc1	S	1498	0.373692	0.895174	0.118422	0	0	0	1	0	0.929792
Q6PAL7	Q6PAL7	AT-hook DNA-binding motif-containing protein 1	Ahdc1	T	41	0.0333014	0.281916	0.0858703	0.814863	0	0.932763	1	0.730936	0.649379
Q922M7	Q922M7	Ashwin	AI597479	S	193	0.00049555	1.45067e-10	0.20745	0	0	0.982241	1	0.689264	0.756937
P31230	P31230	Aminoacyl tRNA synthase complex-interacting multifunctional protein 1;Endothelial monocyte-activating polypeptide 2	Aimp1	S	107	0.887892	0.942746	0.00638278	0.902085	0.848426	1	0.778437	0.836101	0.952011
Q8R010	Q8R010	Aminoacyl tRNA synthase complex-interacting multifunctional protein 2	Aimp2	T	82	0.119395	0.731166	-0.142288	1	0.93439	0.507648	0.888134	0.914125	0.991912
Q91XC0	Q91XC0	LIM domain-containing protein ajuba	Ajuba	S	89	0.083786	0.635248	-0.0554713	1	0.926669	0.853026	0.804182	0.934227	0.822412
Q91XC0	Q91XC0	LIM domain-containing protein ajuba	Ajuba	S	239	0.0707385	0.576873	-0.134235	1	0.906119	0	0.760775	0	0.803552
Q91XC0	Q91XC0	LIM domain-containing protein ajuba	Ajuba	S	129	0.116358	0.725219	0.0359992	0.917377	0.923686	0.97076	1	0.943931	0.996874
O08715	O08715	A-kinase anchor protein 1, mitochondrial	Akap1	S	55	0.178188	0.808878	0.0336825	0.949649	0.908842	0.999457	0.95781	0.96998	1
O08715	O08715	A-kinase anchor protein 1, mitochondrial	Akap1	S	101	0.826451	0.939731	0.00938423	0.869654	0.895974	0.800805	1	0.960518	0.918953
O08715	O08715	A-kinase anchor protein 1, mitochondrial	Akap1	S	103	0.259173	0.858865	-0.0285529	0.966184	1	0.970824	0.890609	0.93282	0.912336
O08715	O08715	A-kinase anchor protein 1, mitochondrial	Akap1	S	104	0.401922	0.900275	0.10405	0	0	1	0	0.947292	0
Q9WTQ5	Q9WTQ5	A-kinase anchor protein 12	Akap12	S	1645	0.116414	0.725091	-0.0306768	0.967896	0.970355	0.928687	0.898031	0.983453	1
Q9WTQ5	Q9WTQ5	A-kinase anchor protein 12	Akap12	S	767	0.781898	0.937297	-0.00641167	0.924907	1	0.956817	0.9475	0.943965	0.95902
Q9WTQ5	Q9WTQ5	A-kinase anchor protein 12	Akap12	S	637	0.522922	0.916641	-0.0218147	0.927642	0.883565	0.798516	0.914547	1	0.865557
Q9WTQ5	Q9WTQ5	A-kinase anchor protein 12	Akap12	T	236	0.353577	0.889939	-0.0646789	0	1	0	0	0	0.929048
Q9WTQ5	Q9WTQ5	A-kinase anchor protein 12	Akap12	T	1191	0.223621	0.841276	-0.0427797	1	0.971325	0.832085	0.973788	0.893536	0.85811
Q9WTQ5	Q9WTQ5	A-kinase anchor protein 12	Akap12	S	786	0.00386037	0.000801233	-0.157248	0.963134	1	0	0	0	0
Q9WTQ5	Q9WTQ5	A-kinase anchor protein 12	Akap12	S	598	0.832729	0.940035	0.00364622	0.97141	0.985226	1	0.968178	0.968216	0.955291
Q9WTQ5	Q9WTQ5	A-kinase anchor protein 12	Akap12	S	584	0.573082	0.92188	-0.0146596	0.952671	0.977537	0.975118	0.903729	0.936056	1
Q9WTQ5	Q9WTQ5	A-kinase anchor protein 12	Akap12	S	482	0.0259967	0.212328	0.132103	0	0	1	0.802531	0	0
Q9WTQ5	Q9WTQ5	A-kinase anchor protein 12	Akap12	S	488	0.816586	0.939743	-0.0238096	0	1	0	0.923282	0	0.619402
Q9WTQ5	Q9WTQ5	A-kinase anchor protein 12	Akap12	S	489	0.297487	0.873201	-0.0356363	1	0.949997	0.973935	0.846866	0.962396	0.933925
Q9WTQ5	Q9WTQ5	A-kinase anchor protein 12	Akap12	S	350	0.997	0.947374	0.000240464	0.950905	0.977248	1	0.929043	0.677382	0.983114
E9Q394	E9Q394	NA	Akap13	S	1892	0.9847	0.946891	-0.00056447	0.980963	0.998564	1	0.977724	0.993018	0.885818
E9Q394	E9Q394	NA	Akap13	S	2663	0.415327	0.901444	0.035393	0.754486	0.962199	0.974173	0.894286	1	0.950672
E9Q394	E9Q394	NA	Akap13	S	1613	0.065396	0.551549	-0.0694391	1	0.946601	0.794095	0.888776	0.908914	0.830725
E9Q394	E9Q394	NA	Akap13	S	2308	0.333512	0.886047	0.0792094	0	0	1	0	0.747527	0
E9Q394	E9Q394	NA	Akap13	S	1839	0.305173	0.875657	-0.0563592	0.993139	0.976929	1	0.746427	0.865664	0.945824
E9Q394	E9Q394	NA	Akap13	S	2692	0.283393	0.868356	0.0370737	0.99197	0.829603	0.989853	1	0.977403	0.910345
E9Q394	E9Q394	NA	Akap13	S	1253	0.0279634	0.221237	-0.0861479	1	0.983983	0	0	0	0
O54931	O54931	A-kinase anchor protein 2	Akap2	S	740	0.0126726	0.0390613	0.0593819	0.900643	0.908284	1	0.998819	0.935703	0.943155
O54931	O54931	A-kinase anchor protein 2	Akap2	S	799	0.000237528	5.5454e-14	-0.303927	1	0.999527	0	0	0	0
Q9DBR0	Q9DBR0	A-kinase anchor protein 8	Akap8	S	320	0.342686	0.887374	-0.0514261	0.938191	0.931157	0.972245	0	0.961897	1
Q9DBR0	Q9DBR0	A-kinase anchor protein 8	Akap8	S	634	0.362131	0.890153	0.04171	0	0	0.857529	0	1	0.86866
Q9DBR0	Q9DBR0	A-kinase anchor protein 8	Akap8	T	632	0.244608	0.855722	0.109038	0	0	0.960792	0	1	0.915457
B1AXD8	B1AXD8	Akirin-2	Akirin2	S	55	0.166128	0.797307	-0.0497143	1	0.990399	0.812537	0.967279	0.936743	0.893011
B1AXD8	B1AXD8	Akirin-2	Akirin2	S	21	0.769002	0.936541	-0.00546329	0.930296	0.892164	0.881688	0.920762	1	0.997118
Q8CG76	Q8CG76	Aflatoxin B1 aldehyde reductase member 2	Akr7a2	S	40	0.0347471	0.297915	-0.102384	0.954953	1	0.734521	0.669195	0.836427	0.613754
Q9D1F4	Q9D1F4	Proline-rich AKT1 substrate 1	Akt1s1	S	184	0.0271076	0.205376	0.0506866	0.922675	0.927494	1	0.98645	0.935899	0.918047
Q9D1F4	Q9D1F4	Proline-rich AKT1 substrate 1	Akt1s1	S	213	0.349525	0.887856	0.0173103	0.94204	0.907523	0.942161	0.976651	0.991968	1
Q9D1F4	Q9D1F4	Proline-rich AKT1 substrate 1	Akt1s1	T	247	0.00625722	0.00507315	0.083396	0.889295	0.861025	0.984255	1	0.912733	0.926048
Q60823	Q60823	RAC-beta serine/threonine-protein kinase	Akt2	T	451	0.205116	0.82961	-0.0219116	0.993343	0.991296	0.960755	0.953309	1	0.98322
P05064	P05064	Fructose-bisphosphate aldolase A	Aldoa	S	36	0.171007	0.805388	-0.116146	0.892014	0.760869	0	0.75021	0.789062	1
P05064	P05064	Fructose-bisphosphate aldolase A	Aldoa	S	39	0.402596	0.899074	0.0172879	0.942685	0.979508	1	0.987861	0.905865	0.960425
P05064	P05064	Fructose-bisphosphate aldolase A	Aldoa	S	46	0.200668	0.826705	-0.075177	0.924211	1	0.887953	0.728797	0.965972	0.745069
Q3TSG4	Q3TSG4	RNA demethylase ALKBH5	Alkbh5	S	362	0.533285	0.917707	0.0126438	0.934829	0.987397	0.967396	1	0.993839	0.979804
P39654	P39654	Arachidonate 15-lipoxygenase	Alox15	S	245	0.214395	0.836666	-0.21486	1	0	0	0	0.894348	0.739794
P39654	P39654	Arachidonate 15-lipoxygenase	Alox15	T	246	0.196471	0.823127	-0.220877	1	0	0	0	0.894348	0.739794
Q920R0	Q920R0	Alsin	Als2	S	486	0.00672691	0.0060175	-0.0965896	0.913254	0.901741	0	0	1	0.959208
Q920R0	Q920R0	Alsin	Als2	S	1456	0.501494	0.914097	0.0266262	0.878982	0.810492	0.809012	1	0.823014	0.902378
Q920R0	Q920R0	Alsin	Als2	S	1458	0.757215	0.935852	-0.00688503	1	0.922705	0.931437	0.959126	0.939961	0.8755
Q920R0	Q920R0	Alsin	Als2	S	477	0.716706	0.933249	-0.040268	0.801507	0.794142	0.956206	0.445938	1	0
Q920R0	Q920R0	Alsin	Als2	S	483	0.294044	0.874125	0.0673521	0.936953	0	1	0.85895	0.867828	0.958869
Q920R0	Q920R0	Alsin	Als2	S	486	0.719446	0.933408	-0.040268	0.801507	0.794142	0.956206	0.445938	1	0
Q9R049	Q9R049	E3 ubiquitin-protein ligase AMFR	Amfr	S	552	0.411405	0.901731	0.0428585	0	0	0	1	0.86682	0.93711
Q9R049	Q9R049	E3 ubiquitin-protein ligase AMFR	Amfr	S	542	0.45633	0.908042	0.0267101	0.809675	0.963846	0.892441	1	0.781634	0.809819
Q9R049	Q9R049	E3 ubiquitin-protein ligase AMFR	Amfr	T	548	0.604965	0.925116	0.0420511	0	0.785542	0	1	0.795188	0
Q8VHG2	Q8VHG2	Angiomotin	Amot	S	691	0.597866	0.925471	-0.0558049	0.842309	0.887056	0	1	0	0.806707
Q8VHG2	Q8VHG2	Angiomotin	Amot	S	693	0.966956	0.946179	0.00271005	0.740504	1	0.81952	0.92976	0.871234	0.854229
Q8VHG2	Q8VHG2	Angiomotin	Amot	S	1083	0.533268	0.918136	0.0607774	0.975577	0	1	0.761662	0.928676	0.751425
Q8VHG2	Q8VHG2	Angiomotin	Amot	T	1084	0.0218859	0.1334	-0.143662	0.777136	1	0	0	0.749411	0.818393
Q9D4H4	Q9D4H4	Angiomotin-like protein 1	Amotl1	S	804	0.165147	0.798844	-0.0620066	1	0.908699	0.907232	0	0.878487	0.803786
Q8K371	Q8K371	Angiomotin-like protein 2	Amotl2	S	599	0.774744	0.936604	-0.0274494	0	0.963323	0.853949	0	1	0.900388
Q8K371	Q8K371	Angiomotin-like protein 2	Amotl2	S	716	0.332921	0.883633	0.045615	1	0.806595	0.988549	0.973666	0.981993	0.965106
Q8K371	Q8K371	Angiomotin-like protein 2	Amotl2	S	664	0.278613	0.8666	-0.0605961	1	0.964693	0.868424	0.865722	0.95396	0.698393
Q8K371	Q8K371	Angiomotin-like protein 2	Amotl2	S	667	0.429579	0.903671	0.0405219	0.982757	0.732353	0.91851	1	0.706203	0
Q8K371	Q8K371	Angiomotin-like protein 2	Amotl2	S	752	0.758067	0.935885	-0.00519737	0.991598	0.972487	0.960948	0.986996	1	0.998581
Q8K371	Q8K371	Angiomotin-like protein 2	Amotl2	S	184	0.401144	0.898867	-0.0373514	1	0.952275	0.920567	0.901165	0.931764	0.748606
Q8K371	Q8K371	Angiomotin-like protein 2	Amotl2	T	593	0.889806	0.942824	0.0023577	0.97086	0	0	1	0	0
Q8K371	Q8K371	Angiomotin-like protein 2	Amotl2	S	599	0.20109	0.825572	-0.0888256	0	0.890855	0	0	1	0.981735
Q8K371	Q8K371	Angiomotin-like protein 2	Amotl2	S	603	0.175561	0.8066	-0.122803	0.987077	0.811764	0	0.848224	1	0.93737
Q9DBT5	Q9DBT5	AMP deaminase 2	Ampd2	S	37	0.112307	0.716601	-0.0605278	1	0.982856	0.846496	0.928853	0.946315	0.842943
Q9DBT5	Q9DBT5	AMP deaminase 2	Ampd2	S	87	0.860393	0.941422	-0.00295186	1	0.975789	0.977693	0.989419	0.99128	0.977043
Q9DBT5	Q9DBT5	AMP deaminase 2	Ampd2	S	53	0.81527	0.939123	-0.00419831	0.975645	0.991324	0.949336	1	0.97693	0.997039
Q9DBT5	Q9DBT5	AMP deaminase 2	Ampd2	S	19	0.326758	0.88217	-0.0914823	1	0	0	0	0	0.969778
Q9DBT5	Q9DBT5	AMP deaminase 2	Ampd2	T	36	0.247294	0.853519	-0.0479443	1	0.982856	0.846496	0.971993	0.946315	0.842943
O08739	O08739	AMP deaminase 3	Ampd3	S	85	0.0895637	0.655511	0.0465427	0.935535	0.870759	0.973674	0.969678	0.980651	1
P53995	P53995	Anaphase-promoting complex subunit 1	Anapc1	S	688	0.145405	0.772973	0.0267857	0.948258	0.96226	0.993547	1	0.943249	0.960857
P53995	P53995	Anaphase-promoting complex subunit 1	Anapc1	S	343	0.833838	0.940497	-0.00962497	0.769103	0.803757	0.931255	0	1	0.87028
Q8BZQ7	Q8BZQ7	Anaphase-promoting complex subunit 2	Anapc2	S	547	0.859989	0.942217	0.020953	0.880562	0	0	1	0	0.845033
Q8BZQ7	Q8BZQ7	Anaphase-promoting complex subunit 2	Anapc2	S	549	0.483077	0.911747	-0.0352798	0.78556	1	0.878613	0.773704	0.921809	0.944036
Q8BZQ7	Q8BZQ7	Anaphase-promoting complex subunit 2	Anapc2	S	513	0.793755	0.937975	0.0108963	0.942006	0.992526	1	0.987211	0.975506	0.724553
Q8BZQ7	Q8BZQ7	Anaphase-promoting complex subunit 2	Anapc2	S	514	0.793755	0.937975	0.0108963	0.942006	0.992526	1	0.987211	0.975506	0.724553
Q91W96	Q91W96	Anaphase-promoting complex subunit 4	Anapc4	S	777	0.944968	0.944919	-0.00733159	0.995927	0	0	1	0	0.836751
Q91W96	Q91W96	Anaphase-promoting complex subunit 4	Anapc4	S	777	0.0699365	0.57552	0.0653116	0.908879	0.833134	0.994315	0.942492	0.960132	1
Q91W96	Q91W96	Anaphase-promoting complex subunit 4	Anapc4	S	779	0.357145	0.88966	0.0413137	0.986059	0.837897	1	0.94788	0.992395	0.948493
Q91W96	Q91W96	Anaphase-promoting complex subunit 4	Anapc4	T	781	0.344357	0.886569	0.0413137	0.980454	0.833134	0.994315	0.942492	0.986754	1
Q8C8R3	Q8C8R3	Ankyrin-2	Ank2	S	846	0.00133824	1.84293e-06	-0.264334	1	0.973376	0	0	0.580588	0.738366
Q8C8R3	Q8C8R3	Ankyrin-2	Ank2	S	3786	0.00108929	3.25073e-07	-0.219763	0.961258	1	0	0	0	0
Q8C8R3	Q8C8R3	Ankyrin-2	Ank2	T	853	0.434234	0.905909	0.112426	0	0	0.90319	0	0	1
Q6ZPS6	Q6ZPS6	Ankyrin repeat and IBR domain-containing protein 1	Ankib1	S	738	0.19183	0.820198	0.0476869	0.831393	0.78672	0.927547	0.924442	1	0.810806
Q6P1H6	Q6P1H6	Ankyrin repeat and LEM domain-containing protein 2	Ankle2	S	820	0.27066	0.863556	0.0673232	0.777391	0.792831	1	0.859981	0.936382	0.648644
E9Q4F7	E9Q4F7	NA	Ankrd11	S	1799	0.0977463	0.68036	-0.0349369	0.9855	1	0.933103	0.909177	0.956026	0.998502
Q99NH0	Q99NH0	Ankyrin repeat domain-containing protein 17	Ankrd17	S	2401	0.149466	0.778371	0.0437592	0.97404	0.885928	0.990663	1	0.982825	0.98942
Q99NH0	Q99NH0	Ankyrin repeat domain-containing protein 17	Ankrd17	S	15	0.00380701	0.000802457	0.183709	0	0	0.877272	1	0	0
Q505D1	Q505D1	Serine/threonine-protein phosphatase 6 regulatory ankyrin repeat subunit A	Ankrd28	S	1011	0.214444	0.835827	0.0385169	0.859073	0.964037	1	0.960476	0.962175	0.989787
P59672	P59672	Ankyrin repeat and SAM domain-containing protein 1A	Anks1a	S	461	0.0083595	0.0129279	0.242234	0.634683	0	0.935903	1	0.874044	0.707267
P59672	P59672	Ankyrin repeat and SAM domain-containing protein 1A	Anks1a	S	462	0.281067	0.866627	0.114927	0	0	1	0	0	0.768182
P59672	P59672	Ankyrin repeat and SAM domain-containing protein 1A	Anks1a	S	679	0.284596	0.868806	-0.0182746	0.982437	1	0.954427	0.96697	0.991751	0.981836
Q8K298	Q8K298	Actin-binding protein anillin	Anln	S	180	0.925774	0.944445	0.00254681	0.952557	0.983928	0.97864	0.966937	0.893306	1
Q8K298	Q8K298	Actin-binding protein anillin	Anln	S	182	0.520091	0.917627	-0.00990351	0	0	0	0	0.921935	1
Q8K298	Q8K298	Actin-binding protein anillin	Anln	S	653	0.497092	0.913445	-0.0138247	1	0.952148	0.93072	0.971971	0.987332	0.984113
Q8K298	Q8K298	Actin-binding protein anillin	Anln	S	292	0.343033	0.886297	-0.0204268	0.989239	1	0.991314	0.930811	0.995881	0.989398
Q8K298	Q8K298	Actin-binding protein anillin	Anln	S	637	0.72309	0.933741	-0.0131546	0.998384	0.984835	0.952184	0.972102	1	0.79492
Q8K298	Q8K298	Actin-binding protein anillin	Anln	S	512	0.826563	0.939372	-0.0182943	0	1	0.927283	0	0.989538	0
Q8K298	Q8K298	Actin-binding protein anillin	Anln	S	513	0.349095	0.887885	0.107507	1	0	0.951554	0.908069	0.890752	0.868033
Q6PB70	Q6PB70	Anoctamin-8	Ano8	S	665	0.318097	0.879571	0.0192563	0.944062	0.977952	1	0.992479	0.984501	0.947509
Q6PB70	Q6PB70	Anoctamin-8	Ano8	S	637	0.715989	0.933278	0.0131845	0.992115	0.9399	1	0.977351	0.908572	0.765617
Q9EST5	Q9EST5	Acidic leucine-rich nuclear phosphoprotein 32 family member B	Anp32b	T	265	0.879471	0.942354	0.0123701	0.86856	0.594956	0.760367	0.756636	1	0.612708
Q9CZ52	Q9CZ52	Anthrax toxin receptor 1	Antxr1	S	561	0.108801	0.709286	-0.089366	0.651191	0.688194	0	0	0.773699	1
Q9CZ52	Q9CZ52	Anthrax toxin receptor 1	Antxr1	S	360	0.236821	0.848393	0.0695793	0.718059	0.970618	1	0.947713	0.927639	0.975047
P10107	P10107	Annexin A1	Anxa1	S	34	0.190015	0.818633	-0.0247897	1	0.986028	0.965974	0.932742	0.976135	0.986499
P10107	P10107	Annexin A1	Anxa1	S	37	0.870702	0.94173	-0.0192672	0.886389	1	0.914258	0.905155	0.908686	0
P07356	P07356	Annexin A2	Anxa2	S	127	0.402318	0.899074	-0.019086	0.916529	1	0.912369	0.919936	0.915745	0.96167
P07356	P07356	Annexin A2	Anxa2	S	12	0.156304	0.789683	-0.112964	0.970472	1	0.934569	0	0	0
P07356	P07356	Annexin A2	Anxa2	S	22	0.423153	0.901458	0.122904	0	0	0.958502	0	1	0
P07356	P07356	Annexin A2	Anxa2	S	89	0.830677	0.93995	-0.0117036	0.608686	0	0.486547	1	0	0
P07356	P07356	Annexin A2	Anxa2	S	2	0.116336	0.72522	-0.037749	1	0.94239	0.919773	0.896501	0.954983	0.944986
P07356	P07356	Annexin A2	Anxa2	T	123	0.0344227	0.284754	-0.0690941	0	1	0.76664	0.648951	0.977806	0.895292
P07356	P07356	Annexin A2	Anxa2	T	3	0.116336	0.72522	-0.037749	1	0.94239	0.919773	0.896501	0.954983	0.944986
P07356	P07356	Annexin A2	Anxa2	Y	24	0.3512	0.888317	-0.0207759	0.976108	1	0.984808	0.927991	0.977473	0.973043
O35643	O35643	AP-1 complex subunit beta-1	Ap1b1	S	783	0.327339	0.882895	-0.029223	0.97947	1	0	0	0	0
P35585	P35585	AP-1 complex subunit mu-1	Ap1m1	T	152	0.5165	0.915855	0.0164511	0.903786	0.947172	1	0.912475	0.925427	0.949029
P35585	P35585	AP-1 complex subunit mu-1	Ap1m1	T	223	0.937339	0.944945	-0.00406096	1	0.75135	0.774806	0.957908	0.723495	0.757545
P17426	P17426	AP-2 complex subunit alpha-1	Ap2a1	S	655	0.424261	0.902998	0.0288868	1	0.837294	0.976841	0.970279	0.975938	0.975151
Q9DBG3	Q9DBG3	AP-2 complex subunit beta	Ap2b1	S	4	0.00344698	0.000487291	-0.16497	0.929463	1	0	0	0	0
Q9DBG3	Q9DBG3	AP-2 complex subunit beta	Ap2b1	T	2	0.331558	0.885615	0.0700856	0	0	0	0.820979	1	0.848753
P84091	P84091	AP-2 complex subunit mu	Ap2m1	T	156	0.563964	0.920964	0.0133741	0.944316	0.938291	1	0.926939	0.925931	0.900954
Q9Z1T1	Q9Z1T1	AP-3 complex subunit beta-1	Ap3b1	S	276	0.318591	0.879777	-0.0235965	0.960801	0.991744	0.956916	0.91772	0.945525	1
O54774	O54774	AP-3 complex subunit delta-1	Ap3d1	S	760	0.448148	0.906712	-0.0160023	0.977452	1	0.963593	0.970949	0.985064	0.940456
O54774	O54774	AP-3 complex subunit delta-1	Ap3d1	S	9	0.0598504	0.521481	-0.204369	0.997416	1	0.691719	0	0	0.897084
O54774	O54774	AP-3 complex subunit delta-1	Ap3d1	S	784	0.364214	0.891261	0.0164088	0.954862	0.96624	0.980066	0.986538	0.971087	1
O54774	O54774	AP-3 complex subunit delta-1	Ap3d1	T	758	0.407211	0.900321	-0.170215	0.872218	0	0	0	0	1
O54774	O54774	AP-3 complex subunit delta-1	Ap3d1	S	754	0.234002	0.846079	0.158518	0.780334	0	1	0.89084	0.954446	0
O54774	O54774	AP-3 complex subunit delta-1	Ap3d1	S	755	0.184101	0.81399	0.0428392	0.884207	0.922135	0.958216	0.997008	0.89718	1
O54774	O54774	AP-3 complex subunit delta-1	Ap3d1	S	760	0.0117384	0.0325263	0.0620929	0.895866	0.894144	1	0.999255	0.950828	0.969645
O54774	O54774	AP-3 complex subunit delta-1	Ap3d1	T	758	0.023642	0.161106	0.0908625	0.758476	0.735127	0.859199	0.972058	0.9685	1
Q80V94	Q80V94	AP-4 complex subunit epsilon-1	Ap4e1	S	962	0.801116	0.938377	0.00818415	0.845429	1	0.950623	0.928937	0.793971	0.844028
Q8R5A3	Q8R5A3	Amyloid beta A4 precursor protein-binding family B member 1-interacting protein	Apbb1ip	S	507	0.553086	0.920615	-0.0651753	0.902593	0.946209	0.97975	0	1	0
Q8R5A3	Q8R5A3	Amyloid beta A4 precursor protein-binding family B member 1-interacting protein	Apbb1ip	S	532	0.252643	0.860563	0.104006	0	0	1	0	0.890052	0.937229
Q9DBR4	Q9DBR4	Amyloid beta A4 precursor protein-binding family B member 2	Apbb2	S	334	0.0099313	0.0208997	-0.110461	0.946335	0.97312	0.774145	0.652581	1	0.955326
Q9DBR4	Q9DBR4	Amyloid beta A4 precursor protein-binding family B member 2	Apbb2	S	160	0.125387	0.742409	0.0421774	0.900275	0.887499	0.979026	1	0.836416	0.945897
Q61315	Q61315	Adenomatous polyposis coli protein	Apc	S	778	0.517814	0.915951	-0.0131676	0.94761	1	0.938949	0.960242	0.966843	0.933847
Q61315	Q61315	Adenomatous polyposis coli protein	Apc	S	2283	0.833747	0.940564	0.0101083	0.949386	0.961785	0.965473	0.999325	0	1
Q61315	Q61315	Adenomatous polyposis coli protein	Apc	S	1040	0.451989	0.906737	-0.00472311	0	0	0	0	0.981179	1
Q8R146	Q8R146	Acylamino-acid-releasing enzyme	Apeh	S	187	0.073499	0.592751	-0.101268	1	0.779079	0.661856	0.712524	0.716787	0.657758
P28352	P28352	DNA-(apurinic or apyrimidinic site) lyase;DNA-(apurinic or apyrimidinic site) lyase, mitochondrial	Apex1	S	18	0.800143	0.938315	0.00561252	0.897211	0.942072	0.902919	0.958775	0.947407	1
O35841	O35841	Apoptosis inhibitor 5	Api5	S	464	0.792393	0.937871	0.00436975	0.900871	0.890246	0.917638	0.890086	0.978191	1
Q8K4Z3	Q8K4Z3	NAD(P)H-hydrate epimerase	Apoa1bp	S	43	0.466604	0.909505	-0.0443811	0.92212	0.969559	0.953181	0.812216	0.835299	1
Q8K4Z3	Q8K4Z3	NAD(P)H-hydrate epimerase	Apoa1bp	T	45	0.259606	0.859282	0.185408	0	0.995365	0.937952	1	0	0
Q8VBT6	Q8VBT6	Apolipoprotein B receptor	Apobr	S	484	0.599591	0.924352	-0.0137207	0.929703	0.964956	0.942022	0.899915	0.904897	1
P08030	P08030	Adenine phosphoribosyltransferase	Aprt	S	15	0.926064	0.944455	0.00189193	0.966477	0.962344	0.936763	1	0.891709	0.939924
P04627;Q99N57	Q99N57	Serine/threonine-protein kinase A-Raf;RAF proto-oncogene serine/threonine-protein kinase	Araf;Raf1	S	580;621	0.985035	0.946904	-0.000375502	0.943255	0.94255	0.95393	0.93068	0.946796	1
P04627	P04627	Serine/threonine-protein kinase A-Raf	Araf	Y	155	0.768098	0.936539	-0.0181321	0.985783	1	0.991496	0.907116	0	0.985986
Q4LDD4	Q4LDD4	Arf-GAP with Rho-GAP domain, ANK repeat and PH domain-containing protein 1	Arap1	S	232	0.008359	0.0121733	-0.231974	0.921847	1	0.653739	0	0.96296	0.858973
Q4LDD4	Q4LDD4	Arf-GAP with Rho-GAP domain, ANK repeat and PH domain-containing protein 1	Arap1	S	210	0.43595	0.905621	-0.105315	0	0.897403	0	0	1	0
Q8CHG5	Q8CHG5	Apoptosis-resistant E3 ubiquitin protein ligase 1	Arel1	S	327	0.789759	0.937696	0.00824418	0	0.805521	0.855047	0	0.884888	1
Q9EPJ9	Q9EPJ9	ADP-ribosylation factor GTPase-activating protein 1	Arfgap1	S	360	0.793093	0.937909	-0.00433471	0.955708	0.968642	0.953356	0.955621	1	0.969299
Q9EPJ9	Q9EPJ9	ADP-ribosylation factor GTPase-activating protein 1	Arfgap1	S	344	0.438889	0.90614	0.0334182	0	0	0	0.950858	1	0.979741
Q99K28	Q99K28	ADP-ribosylation factor GTPase-activating protein 2	Arfgap2	S	431	0.0733483	0.591858	0.0400838	0.941872	0.91219	0.986884	1	0.962068	0.993139
Q99K28	Q99K28	ADP-ribosylation factor GTPase-activating protein 2	Arfgap2	S	432	0.0350281	0.301331	0.0577334	0.87404	0.911071	0.977408	0.998773	0.957608	1
Q99K28	Q99K28	ADP-ribosylation factor GTPase-activating protein 2	Arfgap2	S	140	0.197063	0.82335	-0.0744634	1	0	0	0	0.980159	0.945584
Q99K28	Q99K28	ADP-ribosylation factor GTPase-activating protein 2	Arfgap2	S	239	0.139719	0.767728	0.0637122	0.718828	0	0.752525	0.775609	1	0.921675
Q9D8S3	Q9D8S3	ADP-ribosylation factor GTPase-activating protein 3	Arfgap3	S	241	0.36447	0.891346	-0.0191526	0.999987	1	0.997137	0.947294	0.931736	0.949159
Q9D8S3	Q9D8S3	ADP-ribosylation factor GTPase-activating protein 3	Arfgap3	S	331	0.19672	0.825843	-0.0728069	1	0.823835	0.853032	0	0	0
G3X9K3	G3X9K3	Brefeldin A-inhibited guanine nucleotide-exchange protein 1	Arfgef1	S	1566	0.409108	0.900378	-0.0228492	0.936617	1	0.967074	0.892547	0.968524	0.992726
A2A5R2	A2A5R2	Brefeldin A-inhibited guanine nucleotide-exchange protein 2	Arfgef2	S	227	0.398818	0.898341	0.0162454	0.914255	0.898708	0.9219	0.943963	0.960762	1
A2A5R2	A2A5R2	Brefeldin A-inhibited guanine nucleotide-exchange protein 2	Arfgef2	S	1535	0.604442	0.924739	0.010405	0.963833	0.973927	1	0.980346	0.967839	0.899048
A2A5R2	A2A5R2	Brefeldin A-inhibited guanine nucleotide-exchange protein 2	Arfgef2	T	623	0.250436	0.855003	-0.0281811	1	0.935557	0.935736	0.908854	0.916966	0.892328
A2A5R2	A2A5R2	Brefeldin A-inhibited guanine nucleotide-exchange protein 2	Arfgef2	S	1518	0.19103	0.821531	-0.148164	1	0.937906	0.941868	0	0	0
A2A5R2	A2A5R2	Brefeldin A-inhibited guanine nucleotide-exchange protein 2	Arfgef2	S	621	0.692735	0.931694	-0.0108342	0.99305	0.959221	0.918233	1	0.932283	0.891394
A2A5R2	A2A5R2	Brefeldin A-inhibited guanine nucleotide-exchange protein 2	Arfgef2	T	224	0.386745	0.897755	-0.0965034	0	1	0	0	0.992472	0
A2A5R2	A2A5R2	Brefeldin A-inhibited guanine nucleotide-exchange protein 2	Arfgef2	S	214	0.881803	0.942463	-0.00828443	0.857535	0.895907	0.721684	1	0.873879	0.889914
A2A5R2	A2A5R2	Brefeldin A-inhibited guanine nucleotide-exchange protein 2	Arfgef2	S	227	0.263818	0.860794	-0.0606093	1	0.89195	0.718496	0.942131	0.870019	0.885983
A2A5R2	A2A5R2	Brefeldin A-inhibited guanine nucleotide-exchange protein 2	Arfgef2	S	621	0.204948	0.82967	-0.0445477	1	0.888612	0.888782	0.863248	0.870953	0.847552
Q3UL36	Q3UL36	Arginine and glutamate-rich protein 1	Arglu1	S	74	0.852177	0.941035	0.00810552	0.786735	0.971435	1	0.798847	0.875291	0.813149
Q3UL36	Q3UL36	Arginine and glutamate-rich protein 1	Arglu1	S	75	0.879287	0.942327	0.00236536	0.988884	0.995098	0.989847	1	0.987523	0.979115
Q5FWK3	Q5FWK3	Rho GTPase-activating protein 1	Arhgap1	S	51	0.928606	0.944485	-0.0143378	0.852122	0	0	0.84378	0	1
Q8C0D4	Q8C0D4	Rho GTPase-activating protein 12	Arhgap12	S	238	0.328001	0.884379	-0.0775858	1	0.841717	0.795847	0.746263	0	0.825482
Q8C0D4	Q8C0D4	Rho GTPase-activating protein 12	Arhgap12	S	584	0.366491	0.891973	-0.127151	0	1	0	0	0	0.999291
Q6DFV3	Q6DFV3	Rho GTPase-activating protein 21	Arhgap21	S	41	0.322912	0.883274	-0.125508	1	0	0	0	0.853707	0
Q6DFV3	Q6DFV3	Rho GTPase-activating protein 21	Arhgap21	S	917	0.126905	0.744957	0.0983453	0.6709	0.663313	1	0.717694	0.678239	0.670652
Q6DFV3	Q6DFV3	Rho GTPase-activating protein 21	Arhgap21	S	850	0.00145723	4.49765e-06	-0.178747	0.970483	1	0	0	0	0
Q8BL80	Q8BL80	Rho GTPase-activating protein 22	Arhgap22	S	387	0.11446	0.721276	0.046767	0.875199	0.793226	0.927994	1	0.838073	0.944212
Q8BL80	Q8BL80	Rho GTPase-activating protein 22	Arhgap22	S	397	0.048447	0.436721	0.275018	0	0	1	0.938906	0.881331	0
Q69ZH9	Q69ZH9	Rho GTPase-activating protein 23	Arhgap23	S	1221	0.289345	0.869627	0.125001	0	0	0.774081	0.766493	1	0
Q69ZH9	Q69ZH9	Rho GTPase-activating protein 23	Arhgap23	S	550	0.0515644	0.459549	0.0669604	0.908875	0.829811	1	0.979734	0.967899	0.898421
Q69ZH9	Q69ZH9	Rho GTPase-activating protein 23	Arhgap23	S	552	0.833647	0.940326	-0.0250189	0	0.965683	0.862613	0	0	1
Q69ZH9	Q69ZH9	Rho GTPase-activating protein 23	Arhgap23	S	607	0.621149	0.926235	0.026915	0.925545	0.917227	0.949422	1	0.9105	0.635901
Q69ZH9	Q69ZH9	Rho GTPase-activating protein 23	Arhgap23	S	361	0.353004	0.888683	-0.0185867	1	0.994495	0.93886	0.984433	0.997204	0.957498
Q69ZH9	Q69ZH9	Rho GTPase-activating protein 23	Arhgap23	S	372	0.0291336	0.230688	0.0933736	0.763745	0.729761	1	0.89417	0.790029	0.899862
Q69ZH9	Q69ZH9	Rho GTPase-activating protein 23	Arhgap23	S	619	0.294705	0.872274	0.0547404	0.907236	0.754242	0.938527	0.918679	1	0.834501
Q8BN58	Q8BN58	Rho GTPase-activating protein 28	Arhgap28	S	53	0.721678	0.933627	0.00733887	0.915118	0.949606	0.967463	0.923475	0.960987	1
Q8BN58	Q8BN58	Rho GTPase-activating protein 28	Arhgap28	S	640	0.107161	0.704874	-0.0566567	0.987251	0.948347	0.811137	0.925128	0.979324	1
Q8CGF1	Q8CGF1	Rho GTPase-activating protein 29	Arhgap29	S	1039	0.270584	0.865383	0.0646513	0.89648	0	1	0.836182	0	0
Q8CGF1	Q8CGF1	Rho GTPase-activating protein 29	Arhgap29	S	1040	0.25921	0.859548	0.107363	0	0.636081	0.558427	1	0.684083	0.679999
A6X8Z5	A6X8Z5	Rho GTPase-activating protein 31	Arhgap31	S	1092	0.530925	0.917513	0.0171914	0.881731	1	0.956249	0.996193	0.919256	0.915323
A6X8Z5	A6X8Z5	Rho GTPase-activating protein 31	Arhgap31	S	1093	0.685084	0.931174	0.028081	0.728933	1	0.956249	0.888187	0.662841	0.915323
A6X8Z5	A6X8Z5	Rho GTPase-activating protein 31	Arhgap31	S	765	0.123257	0.739543	-0.13602	0.926764	0.931839	0	0.833129	1	0.801463
A6X8Z5	A6X8Z5	Rho GTPase-activating protein 31	Arhgap31	S	272	0.890231	0.942855	0.00721713	0.789422	0.915547	0.743874	1	0.887711	0.653145
A6X8Z5	A6X8Z5	Rho GTPase-activating protein 31	Arhgap31	T	769	0.8222	0.939278	-0.0172001	0.918363	0.929329	0.936179	0.834807	0	1
Q811P8	Q811P8	Rho GTPase-activating protein 32	Arhgap32	S	856	0.759118	0.935939	0.00471394	0.894703	0.895502	0.922561	0.897027	1	0.991192
Q811P8	Q811P8	Rho GTPase-activating protein 32	Arhgap32	S	952	0.582702	0.922723	-0.00999534	0.965429	1	0.981518	0.94406	0.948578	0.963599
Q91YM2	Q91YM2	Rho GTPase-activating protein 35	Arhgap35	S	975	0.850992	0.94084	-0.0289224	0.98659	0.936517	0.995027	0.834022	1	0
Q91YM2	Q91YM2	Rho GTPase-activating protein 35	Arhgap35	S	1106	0.895958	0.943115	0.00405326	0.924876	0.960348	1	0.899165	0.557148	0.627085
Q91YM2	Q91YM2	Rho GTPase-activating protein 35	Arhgap35	S	1176	0.329688	0.884567	-0.164655	1	0	0	0	0	0.983067
Q91YM2	Q91YM2	Rho GTPase-activating protein 35	Arhgap35	S	1179	0.655174	0.928965	0.0163257	0.928752	0.948709	0.946346	0.981908	1	0.866124
Q91YM2	Q91YM2	Rho GTPase-activating protein 35	Arhgap35	Y	1105	0.627036	0.92673	0.0203921	0.932746	0.919772	0.930964	1	0.820532	0.630081
P97393	P97393	Rho GTPase-activating protein 5	Arhgap5	S	968	0.452335	0.907448	0.0229877	0.961101	0.879316	1	0.932979	0.857741	0.949613
P97393	P97393	Rho GTPase-activating protein 5	Arhgap5	S	1217	0.621249	0.926144	-0.00814337	0.97914	0.993601	0.972582	0.973779	0.976109	1
P97393	P97393	Rho GTPase-activating protein 5	Arhgap5	S	1194	0.346578	0.887137	-0.0183864	0.955914	1	0.936036	0.955252	0.911429	0.930736
P97393	P97393	Rho GTPase-activating protein 5	Arhgap5	T	1216	0.14971	0.777698	-0.190336	1	0.912834	0.892415	0	0.89538	0.989194
Q99PT1	Q99PT1	Rho GDP-dissociation inhibitor 1	Arhgdia	S	24	0.167507	0.798139	-0.170459	1	0.890381	0.899728	0	0.949567	0.915871
Q61210	Q61210	Rho guanine nucleotide exchange factor 1	Arhgef1	S	905	0.649362	0.92852	0.0219479	0.999793	0.82293	0.918197	1	0.966022	0.779959
Q8C033	Q8C033	Rho guanine nucleotide exchange factor 10	Arhgef10	S	157	0.903153	0.943355	0.00774454	0	0.973741	1	0	0.86085	0.928392
Q8C033	Q8C033	Rho guanine nucleotide exchange factor 10	Arhgef10	S	7	0.272885	0.863887	0.11735	0	0	0	0.932678	0.877931	1
Q8C033	Q8C033	Rho guanine nucleotide exchange factor 10	Arhgef10	S	1259	0.125843	0.743564	0.141876	0	0	1	0.769429	0	0.946933
Q8C033	Q8C033	Rho guanine nucleotide exchange factor 10	Arhgef10	S	1291	0.833348	0.940056	-0.0165859	1	0	0	0.965779	0.868666	0.92814
Q8C033	Q8C033	Rho guanine nucleotide exchange factor 10	Arhgef10	S	108	0.438973	0.905379	-0.0210098	1	0.941368	0.96129	0.908748	0.903256	0.964045
A2AWP8	A2AWP8	Rho guanine nucleotide exchange factor 10-like protein	Arhgef10l	T	121	0.488291	0.911925	0.0188114	0	0.843396	1	0	0	0.92127
Q80U35	Q80U35	Rho guanine nucleotide exchange factor 17	Arhgef17	S	689	0.983111	0.946828	-0.000560276	0.979062	0.935335	0.950014	0.962377	0.903019	1
Q80U35	Q80U35	Rho guanine nucleotide exchange factor 17	Arhgef17	S	519	0.0642123	0.548119	-0.188411	0.976953	1	0	0.840453	0.907045	0.886933
Q80U35	Q80U35	Rho guanine nucleotide exchange factor 17	Arhgef17	S	414	0.416814	0.901591	0.0139856	0.927243	0.93359	0.942369	0.965684	1	0.978697
Q80U35	Q80U35	Rho guanine nucleotide exchange factor 17	Arhgef17	S	305	0.0364809	0.315755	-0.168038	0.957076	1	0.799529	0	0.938817	0.97641
Q80U35	Q80U35	Rho guanine nucleotide exchange factor 17	Arhgef17	S	308	0.203811	0.827683	-0.0976555	0	0.891325	0	0	1	0.945829
Q80U35	Q80U35	Rho guanine nucleotide exchange factor 17	Arhgef17	S	305	0.152305	0.784603	0.0856937	0	0.912041	1	0.931942	0	0
Q80U35	Q80U35	Rho guanine nucleotide exchange factor 17	Arhgef17	S	994	0.64474	0.928157	0.017777	0.859553	0.928752	0.862098	1	0.974832	0.849514
Q80U35	Q80U35	Rho guanine nucleotide exchange factor 17	Arhgef17	S	456	0.403073	0.89843	0.0425381	0	0	0	1	0	0.786577
Q80U35	Q80U35	Rho guanine nucleotide exchange factor 17	Arhgef17	S	458	0.825694	0.939666	0.00350196	0.981874	0.988006	0.980451	1	0.977639	0.970129
Q80U35	Q80U35	Rho guanine nucleotide exchange factor 17	Arhgef17	S	906	0.192982	0.821074	0.0608188	0.783798	0.932192	0.94768	1	0.841736	0.713469
Q80U35	Q80U35	Rho guanine nucleotide exchange factor 17	Arhgef17	S	142	0.164272	0.795145	-0.0279958	0.995992	1	0.934297	0.951941	0.972664	0.925518
Q80U35	Q80U35	Rho guanine nucleotide exchange factor 17	Arhgef17	S	728	0.121849	0.73573	-0.0304031	0.978958	0.979235	0.942887	0.910539	0.98649	1
Q80U35	Q80U35	Rho guanine nucleotide exchange factor 17	Arhgef17	S	79	0.432546	0.905417	0.0632425	0.951823	0	0.995149	0.787311	0.950278	1
Q6P9R4	Q6P9R4	Rho guanine nucleotide exchange factor 18	Arhgef18	S	961	0.839204	0.940874	-0.0177241	1	0	0.933075	0	0.885364	0
Q6P9R4	Q6P9R4	Rho guanine nucleotide exchange factor 18	Arhgef18	S	1311	0.0700508	0.576051	-0.0414138	0.990699	1	0.914568	0.919994	0.961509	0.908907
Q60875	Q60875	Rho guanine nucleotide exchange factor 2	Arhgef2	S	931	0.182943	0.813297	-0.119252	0.944507	1	0.942858	0	0.889757	0.956066
Q60875	Q60875	Rho guanine nucleotide exchange factor 2	Arhgef2	S	646	0.578839	0.922339	-0.00943815	0.979186	1	0.985868	0.962136	0.972994	0.983683
Q60875	Q60875	Rho guanine nucleotide exchange factor 2	Arhgef2	S	885	0.451268	0.907285	0.037192	0.802774	0.789779	0.748914	1	0.882036	0.815852
Q60875	Q60875	Rho guanine nucleotide exchange factor 2	Arhgef2	S	939	0.0610289	0.531498	0.190156	0	0	1	0.855995	0	0.917688
Q60875	Q60875	Rho guanine nucleotide exchange factor 2	Arhgef2	S	940	0.252795	0.858158	-0.150131	0.691582	0.85052	0	0	1	0
Q60875	Q60875	Rho guanine nucleotide exchange factor 2	Arhgef2	S	959	0.777117	0.937562	-0.0451879	0.987173	0	0	0.840241	1	0
Q9CWR0;A2CG49	Q9CWR0	Rho guanine nucleotide exchange factor 25;Kalirin	Arhgef25;Kalrn	S	516;2208	0.591099	0.923131	-0.031212	0	1	0.958492	0.621061	0	0.847941
Q3UPH7	Q3UPH7	Rho guanine nucleotide exchange factor 40	Arhgef40	S	959	0.77095	0.936677	-0.010167	0.967464	0.978104	0.945738	0.964673	0.853124	1
Q3UPH7	Q3UPH7	Rho guanine nucleotide exchange factor 40	Arhgef40	S	1485	0.674436	0.930321	-0.00659883	1	0.984389	0.980032	0.982394	0.997154	0.986249
Q3UPH7	Q3UPH7	Rho guanine nucleotide exchange factor 40	Arhgef40	S	1472	0.331753	0.883377	0.020688	0.921223	0.947536	1	0.951192	0.959223	0.912176
E9Q7D5	E9Q7D5	NA	Arhgef5	S	953	0.537695	0.918274	-0.0266273	0.899053	1	0.864411	0.929595	0.956454	0.780703
E9Q7D5	E9Q7D5	NA	Arhgef5	S	169	0.322695	0.882993	-0.0891978	0	1	0.602838	0.558587	0	0.45529
E9Q7D5	E9Q7D5	NA	Arhgef5	S	1109	0.1448	0.771912	-0.19679	0.92835	0.943874	0	0.620165	1	0
E9Q7D5	E9Q7D5	NA	Arhgef5	S	1110	0.0808695	0.62553	-0.168319	0.895495	0.976161	0	0.783545	1	0.793609
E9Q7D5	E9Q7D5	NA	Arhgef5	T	168	0.894585	0.943098	-0.00940437	1	0	0.981543	0	0	0
Q9ES28	Q9ES28	Rho guanine nucleotide exchange factor 7	Arhgef7	S	228	0.397982	0.898559	0.111233	0	0	1	0	0.954015	0
Q9ES28	Q9ES28	Rho guanine nucleotide exchange factor 7	Arhgef7	S	776	0.370358	0.892675	0.0297853	0.847815	0.944954	0.91749	0.978779	0.934696	1
Q9ES28	Q9ES28	Rho guanine nucleotide exchange factor 7	Arhgef7	S	673	0.645153	0.928095	-0.00739763	0.981883	1	0.977052	0.982427	0.98154	0.992379
Q9ES28;Q8K4I3	Q9ES28	Rho guanine nucleotide exchange factor 7;Rho guanine nucleotide exchange factor 6	Arhgef7;Arhgef6	S	682;648	0.319162	0.879941	0.02365	0.939042	0.948909	1	0.970907	0.842728	0.915545
Q9ES28	Q9ES28	Rho guanine nucleotide exchange factor 7	Arhgef7	S	497	0.689408	0.931409	0.00650418	0.977688	0.990165	0.988102	0.99804	0.983296	1
Q9ES28;Q8K4I3	Q9ES28	Rho guanine nucleotide exchange factor 7;Rho guanine nucleotide exchange factor 6	Arhgef7;Arhgef6	T	683;649	0.319162	0.879941	0.02365	0.939042	0.948909	1	0.970907	0.842728	0.915545
A2BH40	A2BH40	AT-rich interactive domain-containing protein 1A	Arid1a	S	697	0.800717	0.938329	0.00401992	0.987578	0.969237	0.982944	0.987412	0.984448	1
A2BH40	A2BH40	AT-rich interactive domain-containing protein 1A	Arid1a	S	770	0.39308	0.897881	-0.0954	0	1	0	0	0.982929	0
A2BH40	A2BH40	AT-rich interactive domain-containing protein 1A	Arid1a	S	773	0.740356	0.935498	-0.0281319	1	0	0.873706	0	0	0
A2BH40	A2BH40	AT-rich interactive domain-containing protein 1A	Arid1a	S	365	0.514095	0.915473	-0.0116126	1	0.993473	0.966765	0.982016	0.934962	0.89207
A2BH40	A2BH40	AT-rich interactive domain-containing protein 1A	Arid1a	T	1886	0.413657	0.901058	0.0642477	0	0	1	0	0.952878	0
A2BH40	A2BH40	AT-rich interactive domain-containing protein 1A	Arid1a	T	1874	0.750449	0.936229	0.0157607	0	0.903506	1	0	0	0.883668
E9Q7E2	E9Q7E2	NA	Arid2	S	631	0.318677	0.882826	-0.0558942	0.985813	0.968792	0	1	0	0
Q8BM75	Q8BM75	AT-rich interactive domain-containing protein 5B	Arid5b	S	1032	0.95788	0.945802	-0.000883072	0.974581	1	0.998632	0.972742	0.972044	0.980501
Q640N2	Q640N2	ADP-ribosylation factor-like protein 13B	Arl13b	S	328	0.267072	0.861821	-0.0815249	0.964058	0.978897	0.991245	0	1	0.990702
Q9JM93	Q9JM93	ADP-ribosylation factor-like protein 6-interacting protein 4	Arl6ip4	S	140	0.96524	0.946105	0.000732852	0.972886	1	0.977549	0.997818	0.985337	0.996727
Q8BH07	Q8BH07	ADP-ribosylation factor-like protein 6-interacting protein 6	Arl6ip6	S	80	0.2924	0.871539	0.0208201	0.935303	0.981007	1	0.985967	0.96589	0.976241
Q9D0L7	Q9D0L7	Armadillo repeat-containing protein 10	Armc10	S	43	0.398341	0.898258	-0.0140812	0.997616	0.990306	0.961693	0.980075	1	0.985721
P53762	P53762	Aryl hydrocarbon receptor nuclear translocator	Arnt	S	77	0.359871	0.890286	0.018809	0.922359	0.982037	1	0.99329	0.881679	0.828231
Q9WV32	Q9WV32	Actin-related protein 2/3 complex subunit 1B	Arpc1b	S	310	0.308042	0.878256	-0.105736	0	1	0	0	0	0.927779
P56212;P60840	P56212	cAMP-regulated phosphoprotein 19;Alpha-endosulfine	Arpp19;Ensa	S	62;67	0.832522	0.940036	-0.00491225	0.892974	0.956492	0.932148	0.898538	1	0.941498
P98203	P98203	Armadillo repeat protein deleted in velo-cardio-facial syndrome homolog	Arvcf	S	871	0.330563	0.883858	-0.0957621	0.976371	0.928303	0.860406	0	1	0
P98203	P98203	Armadillo repeat protein deleted in velo-cardio-facial syndrome homolog	Arvcf	T	643	0.487407	0.912217	0.0144552	0.938301	0.98642	1	0.979447	0.979765	0.932965
Q9QWY8	Q9QWY8	Arf-GAP with SH3 domain, ANK repeat and PH domain-containing protein 1	Asap1	S	1146	0.269595	0.863159	-0.0278219	1	0.915164	0.863467	0.928738	0.963218	0.951688
Q9QWY8	Q9QWY8	Arf-GAP with SH3 domain, ANK repeat and PH domain-containing protein 1	Asap1	S	800	0.291301	0.872609	0.102535	1	0	0.946254	0.990566	0	0
Q9QWY8	Q9QWY8	Arf-GAP with SH3 domain, ANK repeat and PH domain-containing protein 1	Asap1	S	1059	0.720424	0.933563	0.0109347	0.973008	0.897681	0.978756	0.93229	0.900421	1
Q9QWY8	Q9QWY8	Arf-GAP with SH3 domain, ANK repeat and PH domain-containing protein 1	Asap1	S	732	0.221973	0.840321	-0.0690766	0.966742	0.951743	0.950693	0.739023	1	0.934748
Q9QWY8	Q9QWY8	Arf-GAP with SH3 domain, ANK repeat and PH domain-containing protein 1	Asap1	S	1045	0.330623	0.883052	0.0202056	0.967991	0.924631	0.972556	0.998005	0.956922	1
Q9QWY8	Q9QWY8	Arf-GAP with SH3 domain, ANK repeat and PH domain-containing protein 1	Asap1	S	854	0.00388612	0.000770724	-0.0843536	1	0.986529	0.865179	0.850983	0.990307	0.988617
Q7SIG6	Q7SIG6	Arf-GAP with SH3 domain, ANK repeat and PH domain-containing protein 2	Asap2	S	704	0.578953	0.922374	-0.0103409	0.952838	0.9882	0.940303	0.958997	0.95798	1
Q91X20	Q91X20	Set1/Ash2 histone methyltransferase complex subunit ASH2	Ash2l	S	618	0.418058	0.90265	0.0979476	0	0	1	0	0.98081	0
Q61024	Q61024	Asparagine synthetase [glutamine-hydrolyzing]	Asns	S	218	0.26525	0.861187	-0.10306	1	0.958881	0.772215	0.731509	0.96766	0
Q8VBT9	Q8VBT9	Tether containing UBX domain for GLUT4	Aspscr1	S	193	0.210269	0.833524	-0.0678348	0	0.974246	0	0	0.96441	1
Q8VBT9	Q8VBT9	Tether containing UBX domain for GLUT4	Aspscr1	S	494	0.0284747	0.218949	-0.178216	0.994742	1	0.796533	0	0.972115	0.998637
Q8VBT9	Q8VBT9	Tether containing UBX domain for GLUT4	Aspscr1	S	496	0.0281382	0.225522	-0.177659	0.994742	1	0.796533	0	0.972115	0.998637
Q8VBT9	Q8VBT9	Tether containing UBX domain for GLUT4	Aspscr1	S	279	0.0118344	0.0333273	0.200578	0	0.693335	1	0.96524	0.802327	0.961173
Q8BZ32	Q8BZ32	Putative Polycomb group protein ASXL2	Asxl2	S	653	0.121866	0.735974	-0.0458244	1	0.930084	0.91394	0.818822	0.946963	0.929419
Q8BZ32	Q8BZ32	Putative Polycomb group protein ASXL2	Asxl2	S	477	0.110653	0.71179	0.107371	0	0.855758	1	0.886978	0.831014	0.917052
Q9D5T0	Q9D5T0	ATPase family AAA domain-containing protein 1	Atad1	S	322	0.366135	0.891764	-0.0206905	0.994574	0.965111	0.950937	0.945752	1	0.941682
P16951	P16951	Cyclic AMP-dependent transcription factor ATF-2	Atf2	S	94	0.83041	0.939925	0.0046556	0.938279	0.975703	1	0.935221	0.908646	0.972062
Q8R0S1	Q8R0S1	Cyclic AMP-dependent transcription factor ATF-7	Atf7	S	246	0.00838038	0.0145973	-0.234574	0.942884	1	0	0	0.672238	0
Q8R0S1	Q8R0S1	Cyclic AMP-dependent transcription factor ATF-7	Atf7	T	326	0.0588224	0.513372	0.181111	0.719257	0	0.988606	1	0	0.157421
Q8R0S1	Q8R0S1	Cyclic AMP-dependent transcription factor ATF-7	Atf7	T	53	0.0331856	0.280135	0.0710805	0.835917	0.917457	1	0.999619	0.916489	0.955236
Q7TT18	Q7TT18	Activating transcription factor 7-interacting protein 1	Atf7ip	S	951	0.180098	0.810835	-0.126872	1	0.82763	0.867455	0	0.909595	0.9627
Q7TT18	Q7TT18	Activating transcription factor 7-interacting protein 1	Atf7ip	S	112	0.79157	0.937819	-0.00406174	1	0.993974	0.996511	0.984682	0.983443	0.988097
Q7TT18	Q7TT18	Activating transcription factor 7-interacting protein 1	Atf7ip	S	591	0.5047	0.914682	0.0819949	0	0	0	0.941131	1	0
Q7TT18	Q7TT18	Activating transcription factor 7-interacting protein 1	Atf7ip	S	593	0.391935	0.898058	-0.103419	0.994244	0.958331	0.985349	0	0	1
Q8C0J2	Q8C0J2	Autophagy-related protein 16-1	Atg16l1	S	269	0.0585745	0.509971	0.082715	0.760952	0.85098	0.990694	1	0.941068	0.771649
Q80XK6	Q80XK6	Autophagy-related protein 2 homolog B	Atg2b	S	839	0.0408238	0.363494	-0.0885712	0.982985	1	0.774106	0.9021	0.805355	0.846646
Q8BGE6	Q8BGE6	Cysteine protease ATG4B	Atg4b	S	383	0.20758	0.831433	0.0415374	0.976362	0.855274	0.978078	1	0.953403	0.963753
O35126	O35126	Atrophin-1	Atn1	S	34	0.846886	0.94119	-0.0139807	0	0.558099	0.585071	0.761412	1	0.360006
O35126	O35126	Atrophin-1	Atn1	S	630	0.262032	0.860892	-0.0807087	1	0.998124	0.995742	0	0.976733	0.79144
O35126	O35126	Atrophin-1	Atn1	S	77	0.0840332	0.636107	0.0514215	0.733237	0.840406	0.8858	0.92957	0.959263	1
O35126	O35126	Atrophin-1	Atn1	S	79	0.0840332	0.636107	0.0514215	0.733237	0.840406	0.8858	0.92957	0.959263	1
O54827	O54827	Probable phospholipid-transporting ATPase VA	Atp10a	S	470	0.479447	0.911124	0.0111258	0.939645	0.955426	0.971352	0.969097	1	0.997696
Q5XF89	Q5XF89	Probable cation-transporting ATPase 13A3	Atp13a3	S	813	0.0813904	0.626133	-0.0385223	1	0.97438	0.921203	0.932127	0.955301	0.987508
O55143	O55143	Sarcoplasmic/endoplasmic reticulum calcium ATPase 2	Atp2a2	S	663	0.577508	0.922332	0.0181469	0.889802	1	0.952011	0.995518	0.953774	0.986442
G5E829	G5E829	Plasma membrane calcium-transporting ATPase 1	Atp2b1	S	1155	0.781484	0.937256	0.00469663	0.980203	1	0.994655	0.998532	0.971447	0.950017
G5E829	G5E829	Plasma membrane calcium-transporting ATPase 1	Atp2b1	S	17	0.0531801	0.471938	-0.0847506	1	0.965731	0.904414	0.77123	0.902564	0.937402
G5E829	G5E829	Plasma membrane calcium-transporting ATPase 1	Atp2b1	S	1139	0.0855527	0.643487	-0.211034	0.901794	1	0	0	0.977538	0
G5E829	G5E829	Plasma membrane calcium-transporting ATPase 1	Atp2b1	S	1140	0.0887053	0.646925	-0.210605	0.901794	1	0	0	0.977538	0
G5E829	G5E829	Plasma membrane calcium-transporting ATPase 1	Atp2b1	T	1165	0.958709	0.94584	0.00151611	0.977702	0.922095	0.996104	0.90856	0.961378	1
G5E829	G5E829	Plasma membrane calcium-transporting ATPase 1	Atp2b1	S	1155	0.037317	0.32688	0.0573455	0.870118	0.93114	0.993293	1	0.973469	0.986782
G5E829	G5E829	Plasma membrane calcium-transporting ATPase 1	Atp2b1	T	1165	0.037317	0.32688	0.0573455	0.870118	0.93114	0.993293	1	0.973469	0.986782
P15920	P15920	V-type proton ATPase 116 kDa subunit a isoform 2	Atp6v0a2	S	695	0.352475	0.888665	0.0223623	0.95903	0.969482	1	0.99505	0.959807	0.891085
Q64430	Q64430	Copper-transporting ATPase 1	Atp7a	S	1454	0.141295	0.761553	-0.0583218	0.888411	0.840481	0	0	0.801478	1
Q64430	Q64430	Copper-transporting ATPase 1	Atp7a	S	356	0.912779	0.943758	0.00183822	0.965303	0	0	1	0.843578	0.926766
Q61687	Q61687	Transcriptional regulator ATRX	Atrx	S	717	0.0611981	0.526753	-0.0801377	0.883869	1	0.793884	0.779587	0.849601	0.741541
Q61687	Q61687	Transcriptional regulator ATRX	Atrx	S	719	0.011527	0.0329012	-0.180143	0.778841	1	0	0	0.769804	0.799032
Q61687	Q61687	Transcriptional regulator ATRX	Atrx	S	590	0.132933	0.755029	0.0426058	0.876008	0.915326	1	0.927621	0.916249	0.899691
Q61687	Q61687	Transcriptional regulator ATRX	Atrx	S	801	0.501203	0.914047	-0.0521128	1	0.660358	0.701402	0.723569	0.982049	0.678568
Q61687	Q61687	Transcriptional regulator ATRX	Atrx	S	854	0.958273	0.945679	-0.00253496	0.857597	0.937862	0.913052	0.868605	0	1
Q61687	Q61687	Transcriptional regulator ATRX	Atrx	S	315	0.833211	0.940055	0.00330162	0.937861	0.948158	0.942757	0.95445	0.985539	1
Q61687	Q61687	Transcriptional regulator ATRX	Atrx	S	92	0.665556	0.929664	0.006745	0.975089	0.978239	0.981061	0.990924	0.990182	1
Q61687	Q61687	Transcriptional regulator ATRX	Atrx	S	1287	0.3343	0.884026	0.0189488	0.936855	0.9284	0.952299	0.986494	0.954572	1
Q61687	Q61687	Transcriptional regulator ATRX	Atrx	S	626	0.578737	0.922382	-0.0114794	1	0.97453	0.996399	0.940423	0.959925	0.957451
Q61687	Q61687	Transcriptional regulator ATRX	Atrx	S	1290	0.3343	0.884026	0.0189488	0.936855	0.9284	0.952299	0.986494	0.954572	1
Q61687	Q61687	Transcriptional regulator ATRX	Atrx	S	1335	0.264176	0.866839	0.0859753	0	0	0.816089	0	0.980485	1
Q61687	Q61687	Transcriptional regulator ATRX	Atrx	S	1339	0.252769	0.86	0.0846539	0	0	0.816089	0	0.980485	1
Q61687	Q61687	Transcriptional regulator ATRX	Atrx	Y	1985	0.637938	0.928175	0.0298865	0.84368	0	1	0	0.905181	0.789934
Q61687	Q61687	Transcriptional regulator ATRX	Atrx	S	912	0.372366	0.89306	-0.162114	0.997287	0	0	0	1	0
Q61687	Q61687	Transcriptional regulator ATRX	Atrx	S	1512	0.662343	0.929809	-0.0593927	0.811767	0.898006	1	0	0	0.932866
Q61687	Q61687	Transcriptional regulator ATRX	Atrx	S	1290	0.405545	0.900402	-0.138314	0.984287	0.97889	0	1	0.96593	0
P54254	P54254	Ataxin-1	Atxn1	S	213	0.842293	0.941099	-0.00316717	0.961018	0	0	0.981403	0.992432	1
P0C7T6	P0C7T6	Ataxin-1-like	Atxn1l	T	328	0.978753	0.946652	0.00041309	0.986562	1	0.991524	0.996442	0.974485	0.96158
O70305	O70305	Ataxin-2	Atxn2	S	697	0.0458271	0.421544	-0.139318	0.97283	1	0.829255	0	0.900611	0.823447
O70305	O70305	Ataxin-2	Atxn2	S	435	0.219845	0.83908	-0.0520246	1	0.855468	0.873033	0.810481	0.878197	0.851283
O70305	O70305	Ataxin-2	Atxn2	T	710	0.917168	0.94406	0.00170886	0.974212	1	0.985098	0.994191	0.954535	0.958667
Q7TQH0	Q7TQH0	Ataxin-2-like protein	Atxn2l	S	597	0.118867	0.730024	-0.0296466	0.997509	1	0.959231	0.944355	0.930526	0.951663
Q7TQH0	Q7TQH0	Ataxin-2-like protein	Atxn2l	S	109	0.895506	0.943083	0.00205819	0.992341	0.990909	0.989043	1	0.980105	0.994205
Q7TQH0	Q7TQH0	Ataxin-2-like protein	Atxn2l	S	637	0.343152	0.889031	-0.114577	1	0	0	0	0.931622	0
Q7TQH0	Q7TQH0	Ataxin-2-like protein	Atxn2l	T	505	0.205592	0.829928	0.0217727	0.956338	0.969242	1	0.997146	0.964195	0.975656
Q7TQH0	Q7TQH0	Ataxin-2-like protein	Atxn2l	S	27	0.237851	0.849743	-0.0519996	0.956476	0	0	0	1	0.905455
Q7TQH0	Q7TQH0	Ataxin-2-like protein	Atxn2l	S	562	0.578835	0.922446	0.0379366	0.75124	1	0.941588	0.916615	0.935717	0.903064
Q7TQH0	Q7TQH0	Ataxin-2-like protein	Atxn2l	S	333	0.408784	0.900704	0.129664	0	0.926556	0.824088	1	0	0.918408
Q7TQH0	Q7TQH0	Ataxin-2-like protein	Atxn2l	S	337	0.48032	0.911365	-0.13323	0.965552	0.854396	1	0	0	0.884445
Q7TQH0	Q7TQH0	Ataxin-2-like protein	Atxn2l	S	499	0.674033	0.930372	0.0150918	0.98603	0.884669	1	0.921311	0.900872	0.974095
Q7TQH0	Q7TQH0	Ataxin-2-like protein	Atxn2l	S	683	0.815534	0.939049	-0.0246302	0.925631	0.926338	0.753528	0.994002	1	0
P70295	P70295	Ancient ubiquitous protein 1	Aup1	S	290	0.198122	0.821976	-0.0683483	1	0	0	0	0.958931	0.93142
O35625	O35625	Axin-1	Axin1	S	75	0.247749	0.857818	-0.0599295	0	0.867101	0	0	1	0.907668
Q00993	Q00993	Tyrosine-protein kinase receptor UFO	Axl	Y	860	0.00250314	8.9286e-05	-0.0940045	0.974849	0.956228	0.787842	0.780044	0.991431	1
Q3UI43	Q3UI43	BRISC and BRCA1-A complex member 1	Babam1	S	8	0.522026	0.91645	-0.0134623	0.987929	1	0.941636	0.999204	0.984846	0.952749
Q61337	Q61337	Bcl2-associated agonist of cell death	Bad	S	112	0.187369	0.81767	0.135226	0	0.873931	0.859069	1	0.944193	0.75183
Q61337	Q61337	Bcl2-associated agonist of cell death	Bad	S	155	0.0491136	0.439666	0.0643014	0.826035	0.879644	0.932136	1	0.900662	0.942666
Q9JLV1	Q9JLV1	BAG family molecular chaperone regulator 3	Bag3	S	404	0.0240503	0.166314	0.093138	0.749551	0.870664	0.98196	1	0.924115	0.879935
Q9JLV1	Q9JLV1	BAG family molecular chaperone regulator 3	Bag3	S	274	0.263476	0.860655	-0.0438138	0.933108	1	0.844079	0.939371	0.884074	0.984013
Q9JLV1	Q9JLV1	BAG family molecular chaperone regulator 3	Bag3	S	297	0.567929	0.921401	0.0180053	0.895194	0.862516	1	0.838198	0.986981	0.995793
Q9JLV1	Q9JLV1	BAG family molecular chaperone regulator 3	Bag3	S	390	0.595896	0.924008	-0.012746	0.987669	0.921595	0.953699	0.91532	0.980076	1
Q9JLV1	Q9JLV1	BAG family molecular chaperone regulator 3	Bag3	T	560	0.640036	0.927747	-0.00991093	1	0.95534	0.949642	0.970298	0.880112	0.931877
Q9Z1R2	Q9Z1R2	Large proline-rich protein BAG6	Bag6	S	995	0.199628	0.826006	0.03246	0.869812	0.856222	0.948815	0.913459	0.909755	1
Q9Z1R2	Q9Z1R2	Large proline-rich protein BAG6	Bag6	S	1139	0.914351	0.943939	-0.00211467	0.992506	1	0.997429	0.987827	0.934003	0.992634
Q9Z1R2	Q9Z1R2	Large proline-rich protein BAG6	Bag6	T	985	0.472978	0.911335	0.0465004	0	0.853597	0.782284	0.790158	0.8951	1
Q497V6	Q497V6	Bromo adjacent homology domain-containing 1 protein	Bahd1	S	182	0.824553	0.940462	-0.000856111	0	0.941844	0.940553	0	0.871437	1
Q497V6	Q497V6	Bromo adjacent homology domain-containing 1 protein	Bahd1	S	178	0.708396	0.932579	0.0241466	0.895433	0.925719	0.931859	1	0	0.950618
Q8BKX1	Q8BKX1	Brain-specific angiogenesis inhibitor 1-associated protein 2	Baiap2	T	341	0.179322	0.812869	-0.0721222	1	0.9062	0.909635	0	0.944615	0.835808
Q8BKX1	Q8BKX1	Brain-specific angiogenesis inhibitor 1-associated protein 2	Baiap2	T	361	0.0208125	0.130142	-0.102633	0.946083	0.833885	0.704573	0	1	0.945767
Q9DBJ3	Q9DBJ3	Brain-specific angiogenesis inhibitor 1-associated protein 2-like protein 1	Baiap2l1	S	281	0.805269	0.938606	0.00984982	0.897189	1	0.935972	0.995282	0.836497	0.964693
Q99PU7	Q99PU7	Ubiquitin carboxyl-terminal hydrolase BAP1	Bap1	S	581	0.290407	0.871201	0.0518865	0	0	0.879268	0	0.86	1
Q9DCT6	Q9DCT6	Chromatin complexes subunit BAP18	Bap18	S	96	0.672223	0.930247	-0.0243035	0.825183	0.988993	1	0.703939	0.903276	0.939376
Q91XV3	Q91XV3	Brain acid soluble protein 1	Basp1	S	92	0.201136	0.826942	-0.0245117	0.985662	1	0.964446	0.939662	0.947772	0.973637
Q91XV3	Q91XV3	Brain acid soluble protein 1	Basp1	S	131	0.727254	0.93399	-0.00736494	0.971255	1	0.945832	0.997154	0.949038	0.999003
Q91XV3	Q91XV3	Brain acid soluble protein 1	Basp1	T	31	0.00328818	0.000357667	-0.314539	0.921388	0.980326	0.502445	0.243221	0.952384	1
Q91XV3	Q91XV3	Brain acid soluble protein 1	Basp1	T	36	0.720438	0.93354	-0.00680746	0.978934	0.9974	1	0.954997	0.961161	0.969789
O88379	O88379	Bromodomain adjacent to zinc finger domain protein 1A	Baz1a	T	732	0.61038	0.925223	0.00886995	0.979706	0.988693	0.992864	1	0.945955	0.975282
Q9Z277	Q9Z277	Tyrosine-protein kinase BAZ1B	Baz1b	S	1464	0.943639	0.945206	0.00118253	0.980512	0.999087	0.983142	1	0.980722	0.998525
Q9Z277	Q9Z277	Tyrosine-protein kinase BAZ1B	Baz1b	S	359	0.800211	0.939199	-0.0374595	1	0	0	0.88299	0.760372	0
Q9Z277	Q9Z277	Tyrosine-protein kinase BAZ1B	Baz1b	S	361	0.759564	0.935997	-0.00754333	0.849908	0.950994	0.886891	0.885182	0.989977	1
Q9Z277	Q9Z277	Tyrosine-protein kinase BAZ1B	Baz1b	S	1338	0.325115	0.881518	-0.0546592	0.975575	0.999682	0.766747	1	0.891678	0.777743
Q91YE5	Q91YE5	Bromodomain adjacent to zinc finger domain protein 2A	Baz2a	S	1174	0.319402	0.879778	0.0670915	0.711489	0.639692	1	0.662594	0	0.761769
Q91YE5	Q91YE5	Bromodomain adjacent to zinc finger domain protein 2A	Baz2a	S	1042	0.604765	0.924822	-0.0340445	0.970272	0.636974	0.773175	0.699039	0.98897	1
Q91YE5	Q91YE5	Bromodomain adjacent to zinc finger domain protein 2A	Baz2a	T	1041	0.00293498	0.00020621	-0.118331	0.970272	0.971285	0.773175	0.699039	0.98897	1
Q8VBW5	Q8VBW5	HMG box transcription factor BBX	Bbx	S	811	0.0847888	0.638973	0.0610916	0.816541	0.937027	0.975884	1	0.955781	0.947487
Q3TQI7	Q3TQI7	Uncharacterized protein C9orf78 homolog	BC005624	S	261	0.127137	0.745267	0.0312477	0.937075	0.972397	0.998554	1	0.987496	0.98903
Q3TQI7	Q3TQI7	Uncharacterized protein C9orf78 homolog	BC005624	T	253	0.0317359	0.263843	-0.316345	1	0.92565	0	0	0	0.892813
Q3TQI7	Q3TQI7	Uncharacterized protein C9orf78 homolog	BC005624	S	15	0.280489	0.86937	-0.0828536	0.896727	0.919558	0.933071	0	0.964719	1
Q3TQI7	Q3TQI7	Uncharacterized protein C9orf78 homolog	BC005624	S	17	0.283411	0.867873	-0.0795304	0.896727	0.919558	0.933071	0	0.964719	1
Q61140	Q61140	Breast cancer anti-estrogen resistance protein 1	Bcar1	T	330	0.470493	0.910055	0.0327254	0.756677	0.935471	0.908468	0.908162	1	0.881314
Q61140	Q61140	Breast cancer anti-estrogen resistance protein 1	Bcar1	T	389	0.736568	0.934605	-0.0170465	0.877972	0.999982	0.818334	1	0.884664	0.955707
Q61140	Q61140	Breast cancer anti-estrogen resistance protein 1	Bcar1	Y	253	0.409503	0.901334	-0.0761286	0.840802	1	0.997955	0	0.945937	0.956998
Q61140	Q61140	Breast cancer anti-estrogen resistance protein 1	Bcar1	Y	391	0.854499	0.941137	-0.00352514	0.940148	0.998288	0.949857	0.974693	0.985514	1
Q61140	Q61140	Breast cancer anti-estrogen resistance protein 1	Bcar1	Y	414	0.835999	0.94022	-0.00687383	0.874406	0.994489	0.893209	0.952815	1	0.987453
P50136	P50136	2-oxoisovalerate dehydrogenase subunit alpha, mitochondrial	Bckdha	S	334	0.285689	0.870081	0.148786	0.850298	0	0.976504	0.96637	1	0
P50136	P50136	2-oxoisovalerate dehydrogenase subunit alpha, mitochondrial	Bckdha	S	344	0.231749	0.845747	-0.0669586	1	0.967455	0.981987	0.741296	0.837049	0.83854
P50136	P50136	2-oxoisovalerate dehydrogenase subunit alpha, mitochondrial	Bckdha	T	335	0.0561673	0.503092	-0.249442	0.897783	1	0	0	0	0.981525
P50136	P50136	2-oxoisovalerate dehydrogenase subunit alpha, mitochondrial	Bckdha	S	334	0.0820292	0.634644	-0.140628	0.952189	0.919897	0	0	0	1
O54918	O54918	Bcl-2-like protein 11	Bcl2l11	S	73	0.0592676	0.516323	0.126371	0	0	1	0.767065	0.661506	0
P59017	P59017	Bcl-2-like protein 13	Bcl2l13	S	343	0.600536	0.924445	0.0436094	0.732159	1	0.965242	0.926172	0.656666	0.954247
P59017	P59017	Bcl-2-like protein 13	Bcl2l13	S	387	0.998977	0.947456	0.000162534	0.943019	1	0.9827	0.96089	0.969195	0
P59017	P59017	Bcl-2-like protein 13	Bcl2l13	T	342	0.134364	0.75929	-0.195263	0.702364	1	0	0	0	0.972769
P59017	P59017	Bcl-2-like protein 13	Bcl2l13	T	389	0.597602	0.924184	0.0153324	0.879362	0.99819	0.947698	1	0.975127	0.895679
P59017	P59017	Bcl-2-like protein 13	Bcl2l13	S	343	0.760206	0.936752	-0.0338492	0.680461	0.938628	1	0	0.938724	0.895645
P59017	P59017	Bcl-2-like protein 13	Bcl2l13	S	347	0.9566	0.945755	0.00540353	0.86561	0.919622	0.976012	0.830674	1	0.489296
P59017	P59017	Bcl-2-like protein 13	Bcl2l13	T	342	0.861303	0.941854	0.0239984	0.88215	0	0	1	0.790967	0.733474
P59017	P59017	Bcl-2-like protein 13	Bcl2l13	T	345	0.328297	0.882097	-0.0988248	0.935025	0.960236	1	0	0.851633	0.954936
P41183	P41183	B-cell lymphoma 6 protein homolog	Bcl6	S	396	0.376183	0.893682	0.112246	0.966941	0	0.993498	1	0.98731	0
P41183	P41183	B-cell lymphoma 6 protein homolog	Bcl6	S	405	0.221993	0.841817	0.119377	0	0.911934	0.915853	1	0.665184	0.936945
Q921K9	Q921K9	B-cell CLL/lymphoma 7 protein family member B	Bcl7b	S	122	0.563069	0.921438	0.0546496	0.967687	0	0.852318	0.837256	1	0.82918
Q9D219	Q9D219	B-cell CLL/lymphoma 9 protein	Bcl9	S	686	0.76418	0.936284	0.0140953	0.893529	0.718187	0.810333	0.852071	0.877418	1
Q9D219	Q9D219	B-cell CLL/lymphoma 9 protein	Bcl9	T	315	0.576054	0.922119	0.0113388	0.982787	0.945907	0.982859	1	0.994837	0.919473
Q67FY2	Q67FY2	B-cell CLL/lymphoma 9-like protein	Bcl9l	S	21	0.0464779	0.417176	-0.0517056	0.934821	0.98489	0.871981	0.86506	0.964434	1
Q67FY2	Q67FY2	B-cell CLL/lymphoma 9-like protein	Bcl9l	S	747	0.199734	0.825887	-0.0229152	0.976405	1	0.947628	0.954051	0.941003	0.933867
Q67FY2	Q67FY2	B-cell CLL/lymphoma 9-like protein	Bcl9l	S	118	0.135128	0.759707	0.153865	0	0.923584	1	0.980071	0	0.471365
Q67FY2	Q67FY2	B-cell CLL/lymphoma 9-like protein	Bcl9l	S	21	0.327197	0.882131	0.0167304	0.943249	0.964662	0.981059	0.9829	0.984567	1
Q67FY2	Q67FY2	B-cell CLL/lymphoma 9-like protein	Bcl9l	S	25	0.327197	0.882131	0.0167304	0.943249	0.964662	0.981059	0.9829	0.984567	1
Q8K019	Q8K019	Bcl-2-associated transcription factor 1	Bclaf1	S	383	0.651601	0.9286	-0.00725218	1	0.993282	0.982839	0.991658	0.994745	0.979699
Q8K019	Q8K019	Bcl-2-associated transcription factor 1	Bclaf1	S	177	0.270768	0.863621	0.0195673	0.948555	0.954488	1	0.972085	0.962254	0.977699
Q8K019	Q8K019	Bcl-2-associated transcription factor 1	Bclaf1	S	267	0.306989	0.876238	0.0274725	0.915563	0.964658	1	0.957043	0.96331	0.922075
Q8K019	Q8K019	Bcl-2-associated transcription factor 1	Bclaf1	S	646	0.700346	0.932646	-0.0176083	0.957232	0.958045	1	0.813464	0	0.447599
Q8K019	Q8K019	Bcl-2-associated transcription factor 1	Bclaf1	S	183	0.756706	0.935836	0.011248	0.871108	0.968167	1	0.882053	0.868046	0.791053
Q8K019	Q8K019	Bcl-2-associated transcription factor 1	Bclaf1	S	198	0.0147082	0.0598644	0.136492	0	0	0.794153	0.91472	1	0.867569
Q8K019	Q8K019	Bcl-2-associated transcription factor 1	Bclaf1	S	289	0.191525	0.822794	0.110689	0.912596	0	1	0.889277	0	0
Q8K019	Q8K019	Bcl-2-associated transcription factor 1	Bclaf1	T	400	0.708506	0.93242	-0.00967019	0	0	0	0	1	0.735144
Q8K019	Q8K019	Bcl-2-associated transcription factor 1	Bclaf1	S	284	0.807938	0.939207	0.0350592	0.769157	0	0	0.90353	1	0.88066
Q8K019	Q8K019	Bcl-2-associated transcription factor 1	Bclaf1	S	286	0.0934193	0.672216	0.143323	0	0	1	0.787409	0	0.925083
Q8K019	Q8K019	Bcl-2-associated transcription factor 1	Bclaf1	S	529	0.657342	0.929131	0.0309106	0.882027	0.940453	0.963652	1	0.961976	0.547598
Q8K019	Q8K019	Bcl-2-associated transcription factor 1	Bclaf1	S	289	0.129071	0.748778	-0.0372057	0.967775	0.915582	0.898818	0.86682	0.982639	1
Q8K019	Q8K019	Bcl-2-associated transcription factor 1	Bclaf1	Y	283	0.183536	0.813863	-0.175244	1	0.971077	0.953298	0	0.791775	0.887695
Q8K019	Q8K019	Bcl-2-associated transcription factor 1	Bclaf1	S	510	0.918858	0.944133	-0.00155256	0.988931	1	0.992074	0.992554	0.982704	0.982537
Q8K019	Q8K019	Bcl-2-associated transcription factor 1	Bclaf1	S	494	0.869734	0.941876	-0.00286758	0.971612	1	0.983926	0.979588	0.965915	0.985685
Q8K019	Q8K019	Bcl-2-associated transcription factor 1	Bclaf1	S	656	0.75272	0.935554	0.00490294	0.989507	0.989622	0.990593	1	0.972982	0.981458
Q8K019	Q8K019	Bcl-2-associated transcription factor 1	Bclaf1	S	658	0.82407	0.940436	0.0484121	0	0.865468	1	0	0	0
Q8K019	Q8K019	Bcl-2-associated transcription factor 1	Bclaf1	S	688	0.552157	0.919799	0.0386143	0.857008	0.915211	0.926804	1	0.789368	0.464376
A2AG58	A2AG58	Uncharacterized protein CXorf23 homolog	Bclaf3	S	205	0.0832716	0.633106	0.0364266	0.9216	0.946652	0.988263	1	0.930358	0.955639
Q8CGN4	Q8CGN4	BCL-6 corepressor	Bcor	S	423	0.192486	0.82026	-0.111162	0.95014	0.947934	0	0.927062	1	0.924615
Q8CGN4	Q8CGN4	BCL-6 corepressor	Bcor	S	1131	0.320374	0.882128	-0.0823178	0	1	0	0	0.884247	0
Q6PAJ1	Q6PAJ1	Breakpoint cluster region protein	Bcr	S	475	0.839763	0.940477	-0.0114747	0.948908	0	0.883614	0	1	0
O35623	O35623	BET1 homolog	Bet1	S	50	0.202815	0.828009	-0.0214938	1	0.992155	0.962332	0.967279	0.981275	0.97973
Q8R079	Q8R079	Bifunctional apoptosis regulator	Bfar	S	207	0.00427992	0.00111913	0.265071	0	0	1	0.968984	0	0.700023
Q8BR07	Q8BR07	Protein bicaudal D homolog 1	Bicd1	Y	462	0.312817	0.878977	-0.109504	1	0	0	0	0	0.960944
Q921C5	Q921C5	Protein bicaudal D homolog 2	Bicd2	S	331	0.284805	0.868312	0.0703789	0.372052	0	1	0.890963	0.219212	0.177102
Q921C5	Q921C5	Protein bicaudal D homolog 2	Bicd2	S	578	0.323566	0.881118	-0.0287702	0.951144	0.893985	0.879878	0.837365	0.8804	1
O08539	O08539	Myc box-dependent-interacting protein 1	Bin1	S	296	0.947604	0.945276	-0.00551056	1	0.950849	0.981938	0.946743	0	0.956746
O08539	O08539	Myc box-dependent-interacting protein 1	Bin1	S	298	0.379245	0.894567	0.0294567	0.869916	0.986945	0.961242	0.993172	1	0.96085
O08539	O08539	Myc box-dependent-interacting protein 1	Bin1	S	304	0.732241	0.934285	-0.00548959	0.979425	0.981206	0.973599	0.969882	0.976886	1
O08539	O08539	Myc box-dependent-interacting protein 1	Bin1	S	321	0.757016	0.936094	0.0449969	0.821404	0	0	1	0.703405	0.953321
O08539	O08539	Myc box-dependent-interacting protein 1	Bin1	S	324	0.447264	0.90669	-0.0294559	0.982415	1	0.921526	0.979252	0.869321	0.984204
O08539	O08539	Myc box-dependent-interacting protein 1	Bin1	S	332	0.454983	0.90769	0.0118917	0.979163	0.974217	0.994562	1	0.911908	0.926559
O08539	O08539	Myc box-dependent-interacting protein 1	Bin1	S	286	0.531816	0.917676	-0.0509448	0.838612	0.674726	0	0.656844	1	0
O08539	O08539	Myc box-dependent-interacting protein 1	Bin1	S	296	0.00169187	8.47763e-06	-0.118176	0.985406	0.968017	0.750193	0.740256	1	0.953859
O08539	O08539	Myc box-dependent-interacting protein 1	Bin1	S	298	0.00169187	8.47763e-06	-0.118176	0.985406	0.968017	0.750193	0.740256	1	0.953859
O08539	O08539	Myc box-dependent-interacting protein 1	Bin1	S	304	0.379692	0.894606	-0.0574648	0.74756	0.968017	0.750193	0.740256	1	0.763116
Q62210	Q62210	Baculoviral IAP repeat-containing protein 2	Birc2	S	152	0.343138	0.887083	-0.109803	1	0.767711	0	0.925925	0.863325	0.833038
Q62210	Q62210	Baculoviral IAP repeat-containing protein 2	Birc2	S	153	0.0988217	0.683619	-0.172235	0.992721	0.95673	0	0	1	0
Q62210	Q62210	Baculoviral IAP repeat-containing protein 2	Birc2	S	123	0.300932	0.87833	-0.0292745	0.864776	0	0.732694	0	0.967442	1
O88738	O88738	Baculoviral IAP repeat-containing protein 6	Birc6	S	483	0.374637	0.893572	-0.0193033	0.969532	1	0.976041	0.919621	0.943716	0.981821
O88738	O88738	Baculoviral IAP repeat-containing protein 6	Birc6	S	2978	0.0283923	0.221363	-0.0998891	1	0.974578	0.871758	0.725348	0.883163	0.883471
Q91Z96	Q91Z96	BMP-2-inducible protein kinase	Bmp2k	S	1087	0.281011	0.868906	0.0930742	0	0	0	1	0.969963	0.97239
Q91Z96	Q91Z96	BMP-2-inducible protein kinase	Bmp2k	S	908	0.41491	0.901257	0.0155807	0.973065	0.943735	0.968874	1	0.927607	0.949958
Q8BMQ3	Q8BMQ3	Zinc finger protein basonuclin-2	Bnc2	S	431	0.00235992	6.40395e-05	-0.108364	0.969509	0.975558	0.740219	0.740467	1	0.945675
O54940	O54940	BCL2/adenovirus E1B 19 kDa protein-interacting protein 2	Bnip2	S	114	0.902659	0.943411	-0.00206268	0.970326	1	0.984658	0.979613	0.972426	0.980873
O55003	O55003	BCL2/adenovirus E1B 19 kDa protein-interacting protein 3	Bnip3	S	88	0.651563	0.928683	0.014851	0.872317	0.878206	0.89491	0.901243	0.879098	1
O55003	O55003	BCL2/adenovirus E1B 19 kDa protein-interacting protein 3	Bnip3	T	86	0.971634	0.946369	-0.00293539	0.988008	1	0.989922	0.988794	0.975423	0.623675
Q9Z2F7	Q9Z2F7	BCL2/adenovirus E1B 19 kDa protein-interacting protein 3-like	Bnip3l	S	119	0.0368256	0.321443	0.0557109	0.907614	0.894131	0.972925	1	0.963083	0.919043
Q9Z2F7	Q9Z2F7	BCL2/adenovirus E1B 19 kDa protein-interacting protein 3-like	Bnip3l	S	61	0.113653	0.719497	-0.0618895	1	0.861288	0.790886	0.842524	0.802414	0.809554
Q9Z2F7	Q9Z2F7	BCL2/adenovirus E1B 19 kDa protein-interacting protein 3-like	Bnip3l	S	62	0.113653	0.719497	-0.0618895	1	0.861288	0.790886	0.842524	0.802414	0.809554
Q9Z2F7	Q9Z2F7	BCL2/adenovirus E1B 19 kDa protein-interacting protein 3-like	Bnip3l	S	63	0.113653	0.719497	-0.0618895	1	0.861288	0.790886	0.842524	0.802414	0.809554
Q9Z2F7	Q9Z2F7	BCL2/adenovirus E1B 19 kDa protein-interacting protein 3-like	Bnip3l	S	64	0.113653	0.719497	-0.0618895	1	0.861288	0.790886	0.842524	0.802414	0.809554
E9Q6J5	E9Q6J5	NA	Bod1l	S	1676	0.952309	0.945574	-0.00159549	0.839836	0.93996	0.829225	0.942076	0.943491	1
E9Q6J5	E9Q6J5	NA	Bod1l	S	3010	0.972519	0.946405	0.00211244	0.9627	1	0.974505	0.996056	0.688651	0.988676
E9Q6J5	E9Q6J5	NA	Bod1l	T	2890	0.0752677	0.599705	0.14365	0	0.860224	0.956581	1	0.851931	0.899783
E9Q6J5	E9Q6J5	NA	Bod1l	S	2001	0.119088	0.730675	-0.0358938	0.984816	1	0.920985	0.956835	0.923056	0.889814
E9Q6J5	E9Q6J5	NA	Bod1l	S	237	0.897705	0.943144	-0.00389566	0.844378	0	0.732408	0.698404	1	0
E9Q6J5	E9Q6J5	NA	Bod1l	S	795	0.0457307	0.41073	0.118551	0.692809	0.76742	0.919983	1	0.736798	0.932853
E9Q6J5	E9Q6J5	NA	Bod1l	S	656	0.0232925	0.155327	0.152305	0.790583	0	1	0.974793	0.841905	0.890522
E9Q6J5	E9Q6J5	NA	Bod1l	S	480	0.361406	0.892626	-0.0507373	1	0.691699	0	0.709705	0.794991	0
E9Q6J5	E9Q6J5	NA	Bod1l	T	1072	0.0316202	0.272516	0.121614	0	0	1	0.927903	0	0.860729
Q9D6W8	Q9D6W8	Uncharacterized protein C17orf59 homolog	Borcs6	T	201	0.0285676	0.225736	0.128795	0	0.825447	0.995766	1	0.803245	0.75093
P28028	P28028	Serine/threonine-protein kinase B-raf	Braf	S	787	0.874841	0.9426	0.0156692	0.919957	0	1	0	0	0
P28028	P28028	Serine/threonine-protein kinase B-raf	Braf	S	483	0.221771	0.840229	-0.0327567	1	0.92756	0.916944	0.907582	0.962532	0.924636
P28028	P28028	Serine/threonine-protein kinase B-raf	Braf	S	484	0.335303	0.884841	0.126714	0	1	0.909467	0.985999	0.728037	0.932358
P28028	P28028	Serine/threonine-protein kinase B-raf	Braf	S	766	0.746288	0.935162	-0.00507659	0.984918	0.965909	0.963658	0.968856	1	0.990718
Q8C3R1	Q8C3R1	BRCA1-associated ATM activator 1	Brat1	S	684	0.307954	0.875852	0.11977	1	0	0.910879	0.991762	0.942265	0.974539
Q8C3R1	Q8C3R1	BRCA1-associated ATM activator 1	Brat1	S	685	0.275274	0.86535	-0.036047	1	0.987042	0.989797	0.871328	0.96388	0.919138
Q7JJ13	Q7JJ13	Bromodomain-containing protein 2	Brd2	S	297	0.506512	0.914631	0.0144951	0.969718	0.916057	0.976068	0.965016	1	0.943699
Q8K2F0	Q8K2F0	Bromodomain-containing protein 3	Brd3	S	262	0.229165	0.844289	0.0212459	0.96131	0.957831	1	0.980729	0.999941	0.987772
Q9ESU6	Q9ESU6	Bromodomain-containing protein 4	Brd4	S	1153	0.161132	0.790134	0.152308	0.944278	0	1	0.990682	0.74818	0.863107
O88665	O88665	Bromodomain-containing protein 7	Brd7	S	279	0.501112	0.913968	0.0145868	0.927898	0.990567	0.975203	1	0.947617	0.988735
Q8R3B7	Q8R3B7	Bromodomain-containing protein 8	Brd8	S	284	0.418223	0.904062	0.0665807	0	0.829849	0.654908	1	0.962132	0.927194
Q8R3B7	Q8R3B7	Bromodomain-containing protein 8	Brd8	S	460	0.215913	0.842173	-0.119156	1	0.820871	0.786765	0	0.827777	0
Q8R3B7	Q8R3B7	Bromodomain-containing protein 8	Brd8	T	264	0.0163282	0.0726948	-0.0687745	1	0.991401	0.837614	0.866682	0.929926	0.988363
Q3UQU0	Q3UQU0	Bromodomain-containing protein 9	Brd9	S	103	0.40722	0.902586	-0.0105812	0	0	0	0	0.928221	1
Q3UQU0	Q3UQU0	Bromodomain-containing protein 9	Brd9	S	587	0.928353	0.9445	0.00147076	0.984828	0	1	0	0.949972	0.966964
Q8CFK2	Q8CFK2	Transcription factor IIIB 90 kDa subunit	Brf1	S	552	0.737997	0.934699	0.0512552	0.917893	0.433174	0.556093	1	0.863208	0.357383
B2RRD7	B2RRD7	NA	Brpf1	S	1074	0.341773	0.885945	-0.0183227	1	0.947689	0.90401	0.950946	0.937724	0.925136
B2RRD7	B2RRD7	NA	Brpf1	S	1079	0.350076	0.892727	0.0467777	1	0.664742	0	0	0	0.708062
Q921C3	Q921C3	Bromodomain and WD repeat-containing protein 1	Brwd1	S	1830	0.403019	0.899127	0.0144671	0.964161	0.983424	1	0.998376	0.958959	0.986705
Q921C3	Q921C3	Bromodomain and WD repeat-containing protein 1	Brwd1	T	1926	0.396915	0.898088	0.0296332	0.868514	0.830152	0.831201	1	0.840694	0.899104
Q64152	Q64152	Transcription factor BTF3	Btf3	S	171	0.846621	0.940757	-0.00657012	0.844437	0.792515	0.874112	0.733577	0.890627	1
Q64152	Q64152	Transcription factor BTF3	Btf3	S	156	0.102333	0.69763	-0.192929	1	0.779235	0.518219	0	0.894734	0
Q9Z1S0	Q9Z1S0	Mitotic checkpoint serine/threonine-protein kinase BUB1 beta	Bub1b	S	659	0.188468	0.81604	0.0816204	0	0.717868	0.973144	0.956992	1	0
Q8R149	Q8R149	BUD13 homolog	Bud13	S	238	0.363116	0.891014	0.0169601	0.979306	0.953373	1	0.997706	0.952276	0.99419
Q8R149	Q8R149	BUD13 homolog	Bud13	S	200	0.45273	0.907512	0.0291519	0.838422	0.826459	0.8121	0.989666	1	0.869746
Q8R149	Q8R149	BUD13 homolog	Bud13	T	183	0.851301	0.94086	0.00813614	0	0.864005	0.88424	0	0.999732	1
Q8R149	Q8R149	BUD13 homolog	Bud13	T	131	0.740055	0.93481	0.00912043	0.802157	1	0.904667	0.957363	0.954029	0.969496
Q8R149	Q8R149	BUD13 homolog	Bud13	T	222	0.658342	0.930274	0.0162438	0	0.733902	0.825586	0	1	0.800448
Q8R149	Q8R149	BUD13 homolog	Bud13	S	200	0.140552	0.766481	0.0387615	0.865728	0.932752	0.945268	0.997072	1	0.981123
Q8R149	Q8R149	BUD13 homolog	Bud13	S	148	0.366485	0.89177	0.0149756	0.957891	0.975391	0.990179	0.993909	0.986381	1
Q8R149	Q8R149	BUD13 homolog	Bud13	S	187	0.864845	0.941437	0.000714368	0	0.864005	0.88424	0	0.999732	1
Q8R149	Q8R149	BUD13 homolog	Bud13	S	135	0.0428427	0.383544	0.045173	0.827395	0.78734	0.933131	0.987485	0.984046	1
Q8R149	Q8R149	BUD13 homolog	Bud13	S	226	0.67403	0.931362	0.0145592	0	0.733902	0.825586	0	1	0.800448
Q8R149	Q8R149	BUD13 homolog	Bud13	T	196	0.140552	0.766481	0.0387615	0.865728	0.932752	0.945268	0.997072	1	0.981123
Q8R149	Q8R149	BUD13 homolog	Bud13	T	144	0.366485	0.89177	0.0149756	0.957891	0.975391	0.990179	0.993909	0.986381	1
O54825	O54825	Bystin	Bysl	S	97	0.836369	0.940216	-0.00319488	0.988639	1	0.987168	0.992714	0.99335	0.98665
Q7TPS5	Q7TPS5	C2 domain-containing protein 5	C2cd5	S	817	0.420148	0.902202	0.0168719	0.946007	0.952813	0.964893	1	0.884522	0.946654
Q7TPS5	Q7TPS5	C2 domain-containing protein 5	C2cd5	S	259	0.394	0.896788	0.0751188	0.86241	0.858478	0.982858	1	0	0.819253
Q7TPS5	Q7TPS5	C2 domain-containing protein 5	C2cd5	S	260	0.341531	0.886025	-0.144468	0	1	0	0	0.912815	0
Q7TPS5	Q7TPS5	C2 domain-containing protein 5	C2cd5	T	818	0.420148	0.902202	0.0168719	0.946007	0.952813	0.964893	1	0.884522	0.946654
P97445	P97445	Voltage-dependent P/Q-type calcium channel subunit alpha-1A	Cacna1a	S	2303	0.591849	0.923585	0.0100592	0.953422	0.996683	0.99242	0.991483	1	0.976017
P97445	P97445	Voltage-dependent P/Q-type calcium channel subunit alpha-1A	Cacna1a	S	2318	0.634608	0.928001	-0.0342366	1	0	0.853476	0	0	0
P97445	P97445	Voltage-dependent P/Q-type calcium channel subunit alpha-1A	Cacna1a	S	2220	0.897476	0.943191	-0.00752248	0.766078	0.43685	0	0.553185	1	0
P97445	P97445	Voltage-dependent P/Q-type calcium channel subunit alpha-1A	Cacna1a	S	2091	0.9679	0.946217	-0.0014422	0.865749	0.945705	0.820292	0.985166	1	0.971463
O88427	O88427	Voltage-dependent T-type calcium channel subunit alpha-1H	Cacna1h	T	1801	0.198327	0.826402	-0.123811	0.912789	0	0	0	0.944634	1
O88427	O88427	Voltage-dependent T-type calcium channel subunit alpha-1H	Cacna1h	T	1803	0.20453	0.829203	-0.122205	0.912789	0	0	0	0.944634	1
O88427	O88427	Voltage-dependent T-type calcium channel subunit alpha-1H	Cacna1h	T	1811	0.199861	0.830932	-0.121014	0.912789	0	0	0	0.944634	1
Q9CS00	Q9CS00	Cactin	Cactin	S	148	0.177297	0.808032	-0.0826677	1	0.919452	0.930266	0.676628	0.835813	0.87985
B2RQC6	B2RQC6	CAD protein;Glutamine-dependent carbamoyl-phosphate synthase;Aspartate carbamoyltransferase;Dihydroorotase	Cad	S	1859	0.119055	0.73059	0.048939	0.869083	0.955439	0.981564	1	0.897811	0.937186
B2RQC6	B2RQC6	CAD protein;Glutamine-dependent carbamoyl-phosphate synthase;Aspartate carbamoyltransferase;Dihydroorotase	Cad	S	1823	0.343466	0.888946	0.09271	0	0	0	1	0	0.807747
B2RQC6	B2RQC6	CAD protein;Glutamine-dependent carbamoyl-phosphate synthase;Aspartate carbamoyltransferase;Dihydroorotase	Cad	S	1406	0.227042	0.843734	0.12035	0	0.855564	0.86169	0.876428	0.83536	1
B2RQC6	B2RQC6	CAD protein;Glutamine-dependent carbamoyl-phosphate synthase;Aspartate carbamoyltransferase;Dihydroorotase	Cad	S	1038	0.773725	0.937028	0.0085065	0.91838	0.95716	0.90862	1	0	0
B2RQC6	B2RQC6	CAD protein;Glutamine-dependent carbamoyl-phosphate synthase;Aspartate carbamoyltransferase;Dihydroorotase	Cad	T	1824	0.768377	0.936487	0.0325669	0	0.847311	1	0	0	0
B2RQC6	B2RQC6	CAD protein;Glutamine-dependent carbamoyl-phosphate synthase;Aspartate carbamoyltransferase;Dihydroorotase	Cad	T	1037	0.766452	0.937323	0.0085065	0.91838	0.95716	0.90862	1	0	0
P0DP28;P0DP27;P0DP26	P0DP28	NA	Calm1	S	102;102;102	0.638192	0.927639	-0.034831	0.971389	0	0.816734	0	0	1
O35887	O35887	Calumenin	Calu	S	69	0.907389	0.943635	-0.0048111	0.821929	0.849483	0.813142	0.839696	0.799923	1
Q6PHZ2	Q6PHZ2	Calcium/calmodulin-dependent protein kinase type II subunit delta	Camk2d	S	330	0.340038	0.885473	-0.0771529	0.969481	0.986754	0.706388	1	0.692543	0.540529
Q6PHZ2	Q6PHZ2	Calcium/calmodulin-dependent protein kinase type II subunit delta	Camk2d	S	319	0.153431	0.783103	0.0253745	0.947128	0.963385	1	0.999759	0.942623	0.953253
Q6PHZ2	Q6PHZ2	Calcium/calmodulin-dependent protein kinase type II subunit delta	Camk2d	T	337	0.99354	0.947239	-0.00101395	0.949171	0.532409	0.514191	0.963726	0.94858	1
Q6PHZ2	Q6PHZ2	Calcium/calmodulin-dependent protein kinase type II subunit delta	Camk2d	S	315	0.701675	0.932324	0.0175587	0.937154	0.770549	0.834359	0.93762	1	0.911798
Q6PHZ2	Q6PHZ2	Calcium/calmodulin-dependent protein kinase type II subunit delta	Camk2d	S	319	0.701675	0.932324	0.0175587	0.937154	0.770549	0.834359	0.93762	1	0.911798
Q923T9	Q923T9	Calcium/calmodulin-dependent protein kinase type II subunit gamma	Camk2g	S	311	0.0571173	0.516123	0.0619445	0.778508	0.869987	0.987229	1	0	0
Q923T9	Q923T9	Calcium/calmodulin-dependent protein kinase type II subunit gamma	Camk2g	S	384	0.458966	0.907919	0.111794	0	0	0	0.955634	1	0
Q923T9	Q923T9	Calcium/calmodulin-dependent protein kinase type II subunit gamma	Camk2g	T	382	0.224941	0.842281	-0.149104	1	0.980189	0.938559	0	0.66305	0.99905
Q923T9	Q923T9	Calcium/calmodulin-dependent protein kinase type II subunit gamma	Camk2g	T	287	0.900951	0.943331	0.00193057	0.9899	0.990852	0.986768	1	0.982776	0.994099
Q8C078	Q8C078	Calcium/calmodulin-dependent protein kinase kinase 2	Camkk2	S	572	0.838017	0.940942	0.00790336	0	1	0.836776	0.845731	0	0
Q8C078	Q8C078	Calcium/calmodulin-dependent protein kinase kinase 2	Camkk2	S	495	0.197633	0.824537	0.0581596	0.798306	0.710083	0.779176	1	0.847821	0.87332
P49070	P49070	Calcium signal-modulating cyclophilin ligand	Camlg	S	88	0.0015989	6.81119e-06	-0.249884	1	0.886362	0	0	0.868918	0.982021
A2AHC3	A2AHC3	Calmodulin-regulated spectrin-associated protein 1	Camsap1	S	1069	0.0388882	0.343549	0.0805847	0.896077	0.788766	1	0.962123	0.895472	0.92007
A2AHC3	A2AHC3	Calmodulin-regulated spectrin-associated protein 1	Camsap1	S	481	0.952318	0.945576	0.00204153	0.958487	0.92091	1	0.887736	0.867284	0.991625
A2AHC3	A2AHC3	Calmodulin-regulated spectrin-associated protein 1	Camsap1	S	1135	0.12211	0.736341	0.0985312	0.944892	0.683094	0.99849	1	0.918096	0.975467
A2AHC3	A2AHC3	Calmodulin-regulated spectrin-associated protein 1	Camsap1	S	560	0.58858	0.923356	-0.0148798	0.949338	0.862499	0.908438	0.846169	0.94909	1
A2AHC3	A2AHC3	Calmodulin-regulated spectrin-associated protein 1	Camsap1	T	559	0.58858	0.923356	-0.0148798	0.949338	0.862499	0.908438	0.846169	0.94909	1
Q8C1B1	Q8C1B1	Calmodulin-regulated spectrin-associated protein 2	Camsap2	S	1285	0.391949	0.897093	-0.0443857	0.956296	0.837502	0.783222	0.845475	0.801145	1
Q8C1B1	Q8C1B1	Calmodulin-regulated spectrin-associated protein 2	Camsap2	S	1291	0.696968	0.935159	-0.0212892	1	0	0.910804	0	0	0.800122
Q8C1B1	Q8C1B1	Calmodulin-regulated spectrin-associated protein 2	Camsap2	S	439	0.207585	0.837204	-0.126596	0.901058	0	0	0	1	0.849939
P35564	P35564	Calnexin	Canx	S	582	0.878587	0.942294	0.00241491	0.987463	1	0.998808	0.993837	0.980002	0.986359
P35564	P35564	Calnexin	Canx	S	553	0.402862	0.90111	0.165409	0	0.953616	0.968687	0.913803	0	1
P35564	P35564	Calnexin	Canx	S	553	0.826667	0.939737	0.00643488	0.85054	0.910542	0.898932	0.889735	0.86511	1
P35564	P35564	Calnexin	Canx	S	563	0.826667	0.939737	0.00643488	0.85054	0.910542	0.898932	0.889735	0.86511	1
P40124	P40124	Adenylyl cyclase-associated protein 1	Cap1	S	307	0.503925	0.914838	-0.0394326	1	0.795497	0.856177	0.713488	0.959841	0
P24452	P24452	Macrophage-capping protein	Capg	S	341	0.78003	0.937192	-0.00683808	0.956774	0.938834	0.911684	0.956288	0.904985	1
P24452	P24452	Macrophage-capping protein	Capg	T	330	0.0721567	0.585539	-0.185723	0.975031	1	0	0	0.968281	0
P47753	P47753	F-actin-capping protein subunit alpha-1	Capza1	S	9	0.559586	0.920447	0.00915251	0.973885	0.979592	0.999233	0.984673	0.998535	1
P47754	P47754	F-actin-capping protein subunit alpha-2	Capza2	S	9	0.402864	0.899098	-0.0147839	1	0.989686	0.964646	0.983619	0.997547	0.976645
P47757	P47757	F-actin-capping protein subunit beta	Capzb	S	263	0.902344	0.94359	-0.000742225	0.630545	0.961959	1	0	0.829887	0.805539
Q9CR86	Q9CR86	Calcium-regulated heat stable protein 1	Carhsp1	S	31	0.0755632	0.602128	-0.101096	0.976126	0.958044	0.738821	0.903768	0.959957	1
Q9CR86	Q9CR86	Calcium-regulated heat stable protein 1	Carhsp1	S	42	0.163689	0.794743	-0.0685266	1	0.87056	0.83189	0.824494	0.95846	0.843505
Q9CR86	Q9CR86	Calcium-regulated heat stable protein 1	Carhsp1	S	53	0.419859	0.901781	-0.187855	0.948005	0.960611	0	1	0	0.975104
Q9CR86	Q9CR86	Calcium-regulated heat stable protein 1	Carhsp1	S	31	0.63263	0.927189	-0.0187209	0.798557	0.880869	0.759862	0.857398	1	0.900595
Q9CR86	Q9CR86	Calcium-regulated heat stable protein 1	Carhsp1	S	33	0.63263	0.927189	-0.0187209	0.798557	0.880869	0.759862	0.857398	1	0.900595
Q9CR86	Q9CR86	Calcium-regulated heat stable protein 1	Carhsp1	S	31	0.54396	0.918948	0.0254225	0.818963	0.664452	0.839874	0.734777	0.990696	1
Q9CR86	Q9CR86	Calcium-regulated heat stable protein 1	Carhsp1	S	33	0.54396	0.918948	0.0254225	0.818963	0.664452	0.839874	0.734777	0.990696	1
Q9CR86	Q9CR86	Calcium-regulated heat stable protein 1	Carhsp1	S	42	0.54396	0.918948	0.0254225	0.818963	0.664452	0.839874	0.734777	0.990696	1
Q9ER72	Q9ER72	Cysteine--tRNA ligase, cytoplasmic	Cars	S	390	0.42457	0.903062	0.0260326	0.855651	1	0.979695	0.976841	0.990027	0.970346
Q9ER72	Q9ER72	Cysteine--tRNA ligase, cytoplasmic	Cars	S	102	0.191651	0.819967	-0.0278372	0.965495	1	0.93063	0.90162	0.924097	0.986495
Q8K3W3	Q8K3W3	Protein CASC3	Casc3	S	262	0.90546	0.943547	0.00372022	0.976667	0.935782	0.923623	1	0.919219	0.991955
Q8K3W3	Q8K3W3	Protein CASC3	Casc3	S	263	0.306634	0.876156	-0.0217634	0.979051	1	0.933199	0.981679	0.974046	0.973781
Q8K3W3	Q8K3W3	Protein CASC3	Casc3	S	145	0.462224	0.908761	0.0146913	0.97513	0.955078	1	0.988222	0.928239	0.989906
Q8VHK1	Q8VHK1	Caskin-2	Caskin2	S	797	0.0509371	0.455086	-0.0867028	0.985907	1	0	0	0	0.948781
Q8VHK1	Q8VHK1	Caskin-2	Caskin2	S	799	0.408449	0.901283	0.0828252	0	0.900514	1	0.843808	0.912237	0
Q8VHK1	Q8VHK1	Caskin-2	Caskin2	S	403	0.334679	0.884129	-0.0173429	1	0.990986	0.981632	0.949246	0.971196	0.954719
O08736	O08736	Caspase-12	Casp12	S	104	0.241187	0.850856	-0.124032	0.878782	0.891679	0	0.883899	0.845343	1
O08736	O08736	Caspase-12	Casp12	S	85	0.729203	0.93401	-0.0471251	0.930165	0.982572	0.937462	0.80945	1	0
O08736	O08736	Caspase-12	Casp12	S	89	0.839604	0.940406	0.00944051	0.988174	0.838997	0.862706	1	0.863574	0.96593
P70677	P70677	Caspase-3;Caspase-3 subunit p17;Caspase-3 subunit p12	Casp3	S	26	0.000521845	2.60575e-10	-0.156982	0.989459	1	0.716129	0.734545	0.984623	0.947704
O08738	O08738	Caspase-6;Caspase-6 subunit p18;Caspase-6 subunit p11	Casp6	S	62	0.529251	0.917347	0.0197068	0.830146	0.944031	0.885047	1	0.773915	0.899837
P97864	P97864	Caspase-7;Caspase-7 subunit p20;Caspase-7 subunit p11	Casp7	S	16	0.20603	0.832931	-0.108438	0	1	0	0	0.906054	0.95671
O89110	O89110	Caspase-8;Caspase-8 subunit p18;Caspase-8 subunit p10	Casp8	S	188	0.582752	0.922289	0.0540593	0.816467	0.937226	1	0.955549	0	0.936065
P51125	P51125	Calpastatin	Cast	S	163	0.0241405	0.167423	-0.0808269	0.926227	1	0.812261	0.816277	0.845309	0.777119
P51125	P51125	Calpastatin	Cast	S	165	0.353879	0.889934	-0.0667697	0.848173	0.868447	0.894533	0	0.85585	1
P51125	P51125	Calpastatin	Cast	S	303	0.0413296	0.365608	0.242941	0.789326	0	1	0.998385	0.96447	0.846654
P51125	P51125	Calpastatin	Cast	S	324	0.191569	0.819992	0.0541765	0.886687	0.830582	0.889565	1	0.997997	0.918212
P51125	P51125	Calpastatin	Cast	S	444	0.509296	0.914905	-0.0102426	0.999178	0.996009	0.981157	0.982578	0.992273	1
P51125	P51125	Calpastatin	Cast	S	11	0.974457	0.946413	0.00347221	0.745876	1	0.879237	0.880443	0.937884	0
P51125	P51125	Calpastatin	Cast	S	79	0.430702	0.90645	-0.0398168	0	0.965794	0	0	0	1
P51125	P51125	Calpastatin	Cast	S	81	0.163987	0.794817	-0.170595	1	0.99492	0.954033	0	0.909687	0.897956
P51125	P51125	Calpastatin	Cast	T	216	0.106725	0.703867	-0.0362896	0.988813	0.938802	0.861947	0.861774	1	0.927514
P51125	P51125	Calpastatin	Cast	T	521	0.0573235	0.508054	0.162764	0	0.70017	1	0.913749	0.75172	0
P51125	P51125	Calpastatin	Cast	T	479	0.957937	0.945808	-0.00139356	0.935504	1	0.937967	0.992727	0.849537	0.790814
P51125	P51125	Calpastatin	Cast	S	219	0.867414	0.941763	0.00284363	0.986272	0.970947	0.992392	0.972634	0.982584	1
P51125	P51125	Calpastatin	Cast	T	309	0.417135	0.901749	-0.0423569	0.917856	0.916111	0.770579	0.925219	1	0.853396
P51125	P51125	Calpastatin	Cast	S	323	0.736792	0.934594	-0.0285725	0	0.694121	0	0	1	0
P51125	P51125	Calpastatin	Cast	S	324	0.0197903	0.112686	0.0670593	0.880803	0.849731	1	0.968022	0.820802	0.7799
P51125	P51125	Calpastatin	Cast	T	309	0.00786416	0.0105211	0.0817752	0.847434	0.812561	1	0.963939	0.906426	0.924744
P51125	P51125	Calpastatin	Cast	S	594	0.605665	0.925787	0.0502674	1	0	0.814583	0.95216	0.608479	0.892396
P51125	P51125	Calpastatin	Cast	S	604	0.665596	0.930589	-0.0533008	0.846037	0.75107	0	0.984648	1	0.892262
P51125	P51125	Calpastatin	Cast	S	502	0.0509392	0.454241	-0.122172	0.856334	1	0	0.775061	0.89485	0.927484
A2ARP9	A2ARP9	Cation channel sperm-associated protein 2	Catsper2	S	454	0.428175	0.903615	-0.0640123	0.95787	1	0.936341	0.812046	0.870024	0.555377
C6KI89	C6KI89	Cation channel sperm-associated protein subunit gamma 2	Catsperg2	T	189	0.744316	0.935002	0.043229	0.875022	0.882649	0.952564	0.957341	1	0
P49817	P49817	Caveolin-1	Cav1	S	2	0.807633	0.938711	0.0042632	0.980556	0.970391	0.964137	1	0.968968	0.961105
P49817	P49817	Caveolin-1	Cav1	S	9	0.97494	0.946501	0.000692434	0.978189	0.991319	0.971988	1	0.997448	0.924237
P49817	P49817	Caveolin-1	Cav1	Y	14	0.652982	0.92873	-0.00793706	0.962255	0.995471	0.95751	0.974297	0.985279	1
Q9WVC3	Q9WVC3	Caveolin-2	Cav2	S	23	0.266505	0.861942	0.0229867	0.964311	0.916015	0.967965	0.988492	1	0.989163
Q9WVC3	Q9WVC3	Caveolin-2	Cav2	S	20	0.581875	0.922737	-0.0295699	0.903933	0.96795	0.795674	0.980999	0.894585	1
Q9WVC3	Q9WVC3	Caveolin-2	Cav2	S	23	0.816512	0.939199	0.00531067	0.94482	1	0.983324	0.976626	0.957262	0.995077
Q9WVC3	Q9WVC3	Caveolin-2	Cav2	Y	19	0.829671	0.939882	-0.00416404	0.971813	1	0.983324	0.976626	0.957262	0.995077
O70374	O70374	Protein CBFA2T2	Cbfa2t2	S	24	0.0673634	0.572603	-0.0842856	0.973003	1	0	0.780213	0	0.944512
Q08024	Q08024	Core-binding factor subunit beta	Cbfb	S	173	0.0591405	0.513617	-0.0938611	0.853709	1	0.773517	0.726257	0.768426	0.871241
P48758	P48758	Carbonyl reductase [NADPH] 1	Cbr1	S	30	0.196533	0.817924	-0.0827598	1	0	0.610555	0	0.522103	0
Q8K354	Q8K354	Carbonyl reductase [NADPH] 3	Cbr3	S	30	0.658651	0.928932	0.043761	0.727508	0.795484	0.7535	0.946659	0	1
P83917	P83917	Chromobox protein homolog 1	Cbx1	S	89	0.904474	0.943505	0.00603422	0.92993	0.834642	0.893893	0.894739	1	0.75604
P23198	P23198	Chromobox protein homolog 3	Cbx3	S	93	0.757726	0.936401	0.0429568	0.850503	0	1	0.465535	0.941832	0.888784
P23198	P23198	Chromobox protein homolog 3	Cbx3	S	95	0.832603	0.940029	-0.00369239	0.975662	1	0.992477	0.971819	0.992586	0.972516
P23198	P23198	Chromobox protein homolog 3	Cbx3	S	97	0.41321	0.901683	-0.140522	0.893971	0.948085	0.932701	0	0	1
P23198	P23198	Chromobox protein homolog 3	Cbx3	S	176	0.417349	0.901824	-0.0264764	0.988086	0.998189	0.909011	1	0.97659	0.916102
P23198	P23198	Chromobox protein homolog 3	Cbx3	T	173	0.370517	0.893366	0.182334	0	0	1	0	0	0.991291
P23198	P23198	Chromobox protein homolog 3	Cbx3	S	93	0.0446983	0.401211	0.0620167	0.727022	0.7713	0.917262	0.836614	1	0.959127
P23198	P23198	Chromobox protein homolog 3	Cbx3	S	95	0.719546	0.933414	0.0307029	0	0.729684	0	0.915812	1	0
P23198	P23198	Chromobox protein homolog 3	Cbx3	S	97	0.71173	0.933476	0.0296799	0	0.729684	0	0.915812	1	0
Q9QXV1	Q9QXV1	Chromobox protein homolog 8	Cbx8	S	284	0.000346454	1.09433e-12	0.270195	0	0	1	0.909911	0.919105	0.886258
Q9QXV1	Q9QXV1	Chromobox protein homolog 8	Cbx8	S	164	0.766013	0.936358	0.00501274	0.963214	0.9918	1	0.973981	0.993817	1
Q9D1C2	Q9D1C2	Protein chibby homolog 1	Cby1	S	20	0.411656	0.900834	-0.0243614	0.965935	1	0.99668	0.878777	0.907926	0.907435
Q8K1A6	Q8K1A6	Coiled-coil and C2 domain-containing protein 1A	Cc2d1a	S	435	0.434415	0.904584	-0.0170359	0.944733	0.986864	0.925475	0.942231	0.939891	1
Q8VDP4	Q8VDP4	Cell cycle and apoptosis regulator protein 2	Ccar2	S	610	0.789337	0.937733	0.0182304	1	0.887393	0.981006	0.95667	0.719799	0.942004
Q8VDP4	Q8VDP4	Cell cycle and apoptosis regulator protein 2	Ccar2	S	612	0.750454	0.936537	0.0560242	0	0.736741	0	0.902758	1	0.884754
Q8VDP4	Q8VDP4	Cell cycle and apoptosis regulator protein 2	Ccar2	S	625	0.575634	0.922841	-0.114344	0.949463	0.2789	0	0	1	0
Q8VDP4	Q8VDP4	Cell cycle and apoptosis regulator protein 2	Ccar2	S	626	0.840602	0.940454	0.00671306	0.89036	1	0.988273	0.923436	0.938106	0.96186
Q3TMW1	Q3TMW1	Coiled-coil domain-containing protein 102A	Ccdc102a	S	536	0.74091	0.935164	-0.0107602	0.845235	0	0.808094	0	1	0.815179
Q3TMW1	Q3TMW1	Coiled-coil domain-containing protein 102A	Ccdc102a	S	26	0.0609456	0.53075	0.122143	0.788425	0	0.859657	1	0.829865	0.903193
Q3TMW1	Q3TMW1	Coiled-coil domain-containing protein 102A	Ccdc102a	S	28	0.91494	0.944031	0.00639536	0.92238	0.920755	0.875464	1	0.907632	0
Q8R344	Q8R344	Coiled-coil domain-containing protein 12	Ccdc12	S	165	0.848725	0.940846	0.00329196	0.984644	0.973672	0.977079	0.991077	0.969875	1
Q8CI71	Q8CI71	Coiled-coil domain-containing protein 132	Ccdc132	S	492	0.830843	0.939586	-0.024037	0	1	0.893445	0	0.915859	0
Q3TVA9	Q3TVA9	Coiled-coil domain-containing protein 136	Ccdc136	S	50	0.405598	0.899696	-0.0357604	1	0.895622	0.898684	0.829277	0.975575	0.764247
Q6PDM4	Q6PDM4	Coiled-coil domain-containing protein 36	Ccdc36	T	180	0.770874	0.936678	-0.0153022	0.780061	1	0.895658	0.833348	0.898394	0.888386
Q9CR29	Q9CR29	Coiled-coil domain-containing protein 43	Ccdc43	T	137	0.408297	0.900084	-0.0161974	0.994241	0.959693	0.938104	0.963156	1	0.973509
D3YZP9	D3YZP9	Coiled-coil domain-containing protein 6	Ccdc6	S	237	0.140884	0.766805	0.0271018	0.951782	0.954381	0.989037	1	0.960664	0.980144
D3YZP9	D3YZP9	Coiled-coil domain-containing protein 6	Ccdc6	S	233	0.0351567	0.302685	-0.11905	0.972108	0.999368	0.877725	0.710057	1	0.999061
D3YZP9	D3YZP9	Coiled-coil domain-containing protein 6	Ccdc6	S	237	0.0351567	0.302685	-0.11905	0.972108	0.999368	0.877725	0.710057	1	0.999061
Q8CDV6	Q8CDV6	Coiled-coil domain-containing protein 63	Ccdc63	S	459	0.127394	0.745368	0.164986	0.870296	0	0.904587	0.981145	1	0.982854
Q5SP85	Q5SP85	Coiled-coil domain-containing protein 85A	Ccdc85a	S	342	0.199055	0.826179	-0.108459	0.8471	1	0.818596	0	0.777879	0
E9Q6B2	E9Q6B2	Coiled-coil domain-containing protein 85C	Ccdc85c	S	247	0.89907	0.943418	0.00798615	0	1	0.77758	0.915718	0.930635	0
Q9JJ89	Q9JJ89	Coiled-coil domain-containing protein 86	Ccdc86	S	18	0.386102	0.895886	-0.0139063	0.988301	1	0.967749	0.97374	0.953124	0.947396
Q9JJ89	Q9JJ89	Coiled-coil domain-containing protein 86	Ccdc86	S	283	0.927412	0.94473	0.0051871	0.893973	0	0	0.942452	1	0
Q5SNZ0	Q5SNZ0	Girdin	Ccdc88a	S	1677	0.591637	0.923601	-0.0116515	1	0.941123	0.941616	0.954487	0.966052	0.912814
Q5SNZ0	Q5SNZ0	Girdin	Ccdc88a	S	1680	0.433678	0.906215	-0.0749965	1	0.834217	0	0.967744	0.758214	0
Q5SNZ0	Q5SNZ0	Girdin	Ccdc88a	S	1417	0.341302	0.884917	-0.053697	0.86935	0.939224	0	0	1	0
Q9D6J3	Q9D6J3	Coiled-coil domain-containing protein 94	Ccdc94	S	211	0.346408	0.88716	0.0257239	0.767369	0.868792	0.856517	0.883	0.951611	1
Q9D6J3	Q9D6J3	Coiled-coil domain-containing protein 94	Ccdc94	S	213	0.346408	0.88716	0.0257239	0.767369	0.868792	0.856517	0.883	0.951611	1
A3KGF9	A3KGF9	Uncharacterized protein C15orf52 homolog	Ccdc9b	T	146	0.152424	0.781543	-0.206459	0.872779	1	0.873828	0	0.943524	0.998087
A3KGF9	A3KGF9	Uncharacterized protein C15orf52 homolog	Ccdc9b	T	496	0.612797	0.92586	0.114865	0	1	0.95867	0.936715	0	0.983464
A3KGF9	A3KGF9	Uncharacterized protein C15orf52 homolog	Ccdc9b	S	138	0.00757161	0.00903763	0.223695	0	0.705838	1	0.997445	0.774398	0.818381
Q8K2Y9	Q8K2Y9	Cerebral cavernous malformations protein 2 homolog	Ccm2	S	402	0.31847	0.880881	0.0703775	0.601288	0	1	0	0	0.999651
Q8K2Y9	Q8K2Y9	Cerebral cavernous malformations protein 2 homolog	Ccm2	S	393	0.545139	0.918949	0.00943973	0.97605	0.986815	0.994287	1	0.969423	0.97483
Q8K2Y9	Q8K2Y9	Cerebral cavernous malformations protein 2 homolog	Ccm2	T	403	0.620387	0.926129	0.010417	0.944287	0.940758	1	0.937853	0.90144	0.978952
Q61457	Q61457	G1/S-specific cyclin-E1	Ccne1	S	385	0.15759	0.788088	-0.0473094	1	0.869816	0.840296	0.848047	0.797215	0.817804
Q61458	Q61458	Cyclin-H	Ccnh	T	315	0.319326	0.879964	-0.0248336	0.917184	0.960396	0.907927	0.870093	0.92	1
O88874	O88874	Cyclin-K	Ccnk	S	341	0.986772	0.946972	-0.000321097	0.960896	1	0.98917	0.970574	0.939741	0.982016
O88874	O88874	Cyclin-K	Ccnk	S	325	0.341897	0.886044	0.0249113	0.911762	0.865957	0.890941	0.981193	1	0.987434
O88874	O88874	Cyclin-K	Ccnk	S	329	0.341897	0.886044	0.0249113	0.911762	0.865957	0.890941	0.981193	1	0.987434
Q52KE7	Q52KE7	Cyclin-L1	Ccnl1	S	358	0.810245	0.938845	0.00374883	0.981642	0.985093	0.99186	0.98581	0.984283	1
Q52KE7	Q52KE7	Cyclin-L1	Ccnl1	S	347	0.444913	0.906443	-0.0998621	0	0.766195	0	0	1	0.511093
Q52KE7	Q52KE7	Cyclin-L1	Ccnl1	S	341	0.134461	0.757377	0.0543049	0.858403	0.865299	0.88961	1	0.873887	0.844798
Q52KE7	Q52KE7	Cyclin-L1	Ccnl1	S	347	0.157346	0.787764	0.0957543	0.96529	0.725815	0.992436	1	0.933022	0.991465
Q7TQK0	Q7TQK0	NA	Ccnt2	S	477	0.930048	0.944633	0.00482393	0.838918	0.948112	0.805294	1	0.799466	0.958507
Q7TQK0	Q7TQK0	NA	Ccnt2	T	476	0.859862	0.941437	0.0173466	0.92887	0	1	0	0	0
Q8BGU5	Q8BGU5	Cyclin-Y	Ccny	S	71	0.908315	0.9435	0.000811752	0.966691	0	0	1	0	0.899419
Q8BGU5	Q8BGU5	Cyclin-Y	Ccny	S	73	0.539485	0.918434	-0.0152844	0.826062	0.877424	0.864756	0.774469	1	0.962779
Q8BGU5	Q8BGU5	Cyclin-Y	Ccny	S	25	0.167444	0.798463	-0.172159	0.989436	1	0	0.953615	0.95144	0.933149
Q8BGU5	Q8BGU5	Cyclin-Y	Ccny	S	324	0.631535	0.927094	0.0313822	0.690833	1	0.870311	0.937043	0.903705	0.944359
Q8BGU5	Q8BGU5	Cyclin-Y	Ccny	S	326	0.105808	0.701572	-0.0297625	0.969967	0.981016	0.927607	0.914965	1	0.993158
Q9WU84	Q9WU84	Copper chaperone for superoxide dismutase	Ccs	S	267	0.407201	0.90369	-0.0198309	0.632866	0	0	0	0.935157	1
Q8C0C4	Q8C0C4	Serine-rich coiled-coil domain-containing protein 1	Ccser1	S	375	0.792747	0.938364	-0.020653	1	0	0	0.931814	0	0
P80314	P80314	T-complex protein 1 subunit beta	Cct2	S	3	0.392498	0.89714	-0.0144521	1	0.990375	0.980606	0.953051	0.979171	0.965553
P80314	P80314	T-complex protein 1 subunit beta	Cct2	S	168	0.878238	0.942018	-0.00546041	0	0.92064	0.759985	0.826623	1	0.474295
P80314	P80314	T-complex protein 1 subunit beta	Cct2	S	169	0.542601	0.919382	-0.0517744	0.855541	0	0	0	1	0
P80314	P80314	T-complex protein 1 subunit beta	Cct2	S	389	0.158165	0.788704	-0.0832502	1	0.892665	0.691861	0.848871	0.885252	0.672149
P80314	P80314	T-complex protein 1 subunit beta	Cct2	S	27	0.443469	0.903759	-0.00557132	0	0	0	0	1	0.907686
P80318	P80318	T-complex protein 1 subunit gamma	Cct3	S	252	0.459272	0.908471	-0.0333856	0.826073	1	0.91261	0.783071	0.743929	0.771535
Q9JLQ0	Q9JLQ0	CD2-associated protein	Cd2ap	S	510	0.815564	0.939139	0.0082139	0.830068	0.938654	0.924408	0.901494	1	0
Q9JLQ0	Q9JLQ0	CD2-associated protein	Cd2ap	S	458	0.0255585	0.185624	0.049022	0.92385	0.917406	0.987155	1	0.933158	0.929946
Q9CWK3	Q9CWK3	CD2 antigen cytoplasmic tail-binding protein 2	Cd2bp2	S	196	0.550482	0.919622	0.0529799	0.714945	0.650732	1	0.613285	0.583262	0.964188
Q76KJ5	Q76KJ5	DNA-directed RNA polymerase I subunit RPA34	Cd3eap	S	170	0.213054	0.835847	-0.119895	1	0.973607	0.976241	0	0	0
P15379	P15379	CD44 antigen	Cd44	S	733	0.174211	0.805258	0.0348722	0.928388	0.851388	0.946348	0.951435	0.983532	1
P15379	P15379	CD44 antigen	Cd44	T	726	0.0168777	0.0788367	-0.0568581	0.981291	1	0.90248	0.892664	0.97733	0.970264
Q8R349	Q8R349	Cell division cycle protein 16 homolog	Cdc16	S	560	0.535829	0.918024	-0.0144763	0.97521	1	0.961554	0.946637	0.83454	0.939822
Q8BGZ4	Q8BGZ4	Cell division cycle protein 23 homolog	Cdc23	S	588	0.959806	0.945881	-0.000761701	0.992378	1	0.995632	0.994364	0.958247	0.963799
Q8BGZ4	Q8BGZ4	Cell division cycle protein 23 homolog	Cdc23	T	562	0.337437	0.886294	0.115621	0	0	0	1	0	0.793148
Q99JP4	Q99JP4	Anaphase-promoting complex subunit CDC26	Cdc26	S	42	0.715405	0.933244	-0.0167659	0.89486	0.973389	0.79891	1	0.872888	0.986515
Q99JP4	Q99JP4	Anaphase-promoting complex subunit CDC26	Cdc26	T	41	0.0358287	0.316214	-0.0825468	0.876787	1	0	0.77203	0.846127	0.907622
A2A6Q5	A2A6Q5	Cell division cycle protein 27 homolog	Cdc27	S	365	0.158489	0.79629	0.0561216	0.85208	0.791712	0.914874	1	0	0.780673
Q61081	Q61081	Hsp90 co-chaperone Cdc37;Hsp90 co-chaperone Cdc37, N-terminally processed	Cdc37	S	13	0.36515	0.891476	0.0496408	1	0.770602	0.964983	0.973113	0.92989	0.940307
Q9CZP7	Q9CZP7	Hsp90 co-chaperone Cdc37-like 1	Cdc37l1	S	86	0.445368	0.90649	-0.0596205	0.825482	1	0.838566	0.732633	0.831339	0
Q7TT50	Q7TT50	Serine/threonine-protein kinase MRCK beta	Cdc42bpb	S	1692	0.195339	0.822847	0.0493219	0.825569	0.829748	0.910329	0.91893	1	0.852691
Q91W92	Q91W92	Cdc42 effector protein 1	Cdc42ep1	S	368	0.0815393	0.626657	-0.038181	0.998509	1	0.934256	0.956472	0.961809	0.931988
Q91W92	Q91W92	Cdc42 effector protein 1	Cdc42ep1	S	371	0.531631	0.916391	-0.0107637	0	0	0	0	1	0.881067
Q91W92	Q91W92	Cdc42 effector protein 1	Cdc42ep1	S	121	0.058465	0.509167	0.0470739	0.905516	0.871861	0.949629	1	0.935496	0.947942
Q91W92	Q91W92	Cdc42 effector protein 1	Cdc42ep1	S	207	0.351754	0.888396	-0.0153183	0.984818	1	0.97262	0.971608	0.97594	0.974224
Q91W92	Q91W92	Cdc42 effector protein 1	Cdc42ep1	S	368	0.139496	0.764885	0.0619557	0.805351	0.939808	0.945154	1	0.90377	0.912902
Q91W92	Q91W92	Cdc42 effector protein 1	Cdc42ep1	S	371	0.139496	0.764885	0.0619557	0.805351	0.939808	0.945154	1	0.90377	0.912902
Q8JZX9	Q8JZX9	Cdc42 effector protein 2	Cdc42ep2	S	109	0.0349507	0.306374	0.106716	0.634418	0.570321	1	0.825452	0.799188	0
Q8JZX9	Q8JZX9	Cdc42 effector protein 2	Cdc42ep2	S	2	0.200432	0.828859	-0.0631989	0.759202	0.887235	0.788775	0	1	0.946157
Q8JZX9	Q8JZX9	Cdc42 effector protein 2	Cdc42ep2	T	3	0.198373	0.829337	-0.0654301	0.759202	0.887235	0.788775	0	1	0.946157
Q8JZX9	Q8JZX9	Cdc42 effector protein 2	Cdc42ep2	S	137	0.311934	0.878915	0.0734455	0	0	0	0.900599	0.883011	1
Q8JZX9	Q8JZX9	Cdc42 effector protein 2	Cdc42ep2	S	141	0.392805	0.896731	0.0609599	0	0	0	0.900599	0.883011	1
Q9CQC5	Q9CQC5	Cdc42 effector protein 3	Cdc42ep3	S	89	0.0972399	0.679013	-0.0646065	0.993164	1	0.927947	0.841216	0.955522	0.851371
Q9CQC5	Q9CQC5	Cdc42 effector protein 3	Cdc42ep3	S	144	0.241097	0.850539	0.045974	0.986466	0.831046	0.996248	1	0.872994	0.796987
Q9CQC5	Q9CQC5	Cdc42 effector protein 3	Cdc42ep3	S	108	0.32841	0.882464	-0.0205104	0.967363	1	0.904465	0.971261	0.913477	0.888249
Q9JM96	Q9JM96	Cdc42 effector protein 4	Cdc42ep4	S	64	0.243502	0.851751	0.0255776	0.906456	0.932005	0.93679	1	0.932609	0.949161
Q9JM96	Q9JM96	Cdc42 effector protein 4	Cdc42ep4	T	161	0.19035	0.823102	0.0506186	0.674628	0	1	0	0	0.732571
Q9Z0X0	Q9Z0X0	Cdc42 effector protein 5	Cdc42ep5	S	22	0.333446	0.883779	-0.034792	0.904487	1	0.863061	0.882834	0.779123	0.941372
Q8BHL7	Q8BHL7	CDC42 small effector protein 1	Cdc42se1	S	77	0.809301	0.938488	-0.0135909	0	1	0.772207	0.790697	0.550248	0
Q6A068	Q6A068	Cell division cycle 5-like protein	Cdc5l	S	303	0.874748	0.942122	-0.00355384	0.964417	1	0.992909	0.959597	0.99105	0.931102
Q6A068	Q6A068	Cell division cycle 5-like protein	Cdc5l	T	227	0.728016	0.934049	0.00930813	0.951819	0.983642	0.971933	1	0.970553	0.860668
Q6A068	Q6A068	Cell division cycle 5-like protein	Cdc5l	Y	232	0.738809	0.93528	0.0402147	0.806297	0	0	1	0	0.710311
Q8BHX3	Q8BHX3	Borealin	Cdca8	S	233	0.853716	0.94052	0.00610835	0	0.967725	1	0	0.931225	0
P55288	P55288	Cadherin-11	Cdh11	S	788	0.920108	0.944198	0.00320703	0.911066	0.987505	1	0.90903	0.885995	0.92841
P55288	P55288	Cadherin-11	Cdh11	S	714	0.275641	0.865468	0.0177864	0.974483	0.976493	0.995657	1	0.968063	0.963444
P11440;Q80YP0;P97377	P11440	Cyclin-dependent kinase 1;Cyclin-dependent kinase 3;Cyclin-dependent kinase 2	Cdk1;Cdk3;Cdk2	T	14;14;14	0.544209	0.918966	-0.0391449	0.908268	0.850593	0.833025	0.799722	1	0.738245
P11440	P11440	Cyclin-dependent kinase 1	Cdk1	T	161	0.502951	0.914178	-0.0138097	0.951699	1	0.929925	0.969952	0.853055	0.825697
P11440;Q80YP0;P97377	P11440	Cyclin-dependent kinase 1;Cyclin-dependent kinase 3;Cyclin-dependent kinase 2	Cdk1;Cdk3;Cdk2	Y	15;15;15	0.941368	0.94511	-0.00122503	0.985746	0.998145	0.980631	1	0.979295	0.992928
P11440;Q80YP0;P97377	P11440	Cyclin-dependent kinase 1;Cyclin-dependent kinase 3;Cyclin-dependent kinase 2	Cdk1;Cdk3;Cdk2	T	14;14;14	0.116557	0.725545	-0.0739224	1	0.928375	0.839197	0.862522	0.949078	0.813685
P11440;Q80YP0;P97377	P11440	Cyclin-dependent kinase 1;Cyclin-dependent kinase 3;Cyclin-dependent kinase 2	Cdk1;Cdk3;Cdk2	Y	15;15;15	0.116557	0.725545	-0.0739224	1	0.928375	0.839197	0.862522	0.949078	0.813685
P24788	P24788	Cyclin-dependent kinase 11B	Cdk11b	S	578	0.849183	0.941509	-0.0214788	0	1	0.910573	0	0.874885	0
P24788	P24788	Cyclin-dependent kinase 11B	Cdk11b	S	65	0.016721	0.0769782	-0.102595	1	0.965879	0.832987	0.712548	0.809254	0.758381
P24788	P24788	Cyclin-dependent kinase 11B	Cdk11b	S	234	0.67404	0.93187	-0.0434034	0.778707	1	0.976453	0	0.963502	0
P24788	P24788	Cyclin-dependent kinase 11B	Cdk11b	T	584	0.271243	0.866381	-0.0328642	0.996003	1	0.947004	0	0	0
P24788	P24788	Cyclin-dependent kinase 11B	Cdk11b	T	61	0.308013	0.87713	0.0734504	0	1	0.95368	0.98754	0	0
P24788	P24788	Cyclin-dependent kinase 11B	Cdk11b	S	578	0.138765	0.763823	-0.0669593	0.91102	0.889144	0.805265	0.706477	1	0.813338
P24788	P24788	Cyclin-dependent kinase 11B	Cdk11b	T	584	0.138765	0.763823	-0.0669593	0.91102	0.889144	0.805265	0.706477	1	0.813338
Q14AX6	Q14AX6	Cyclin-dependent kinase 12	Cdk12	S	677	0.370657	0.892772	0.0250068	0.999446	0.884827	0.981244	1	0.983058	0.984368
Q14AX6	Q14AX6	Cyclin-dependent kinase 12	Cdk12	S	1079	0.764094	0.936281	-0.0164698	0.95937	0.838528	0.989203	0.746307	0.977365	1
Q14AX6	Q14AX6	Cyclin-dependent kinase 12	Cdk12	T	889	0.991133	0.947144	0.000277305	0.972315	0.929156	0.932034	0.970473	0.915726	1
Q14AX6	Q14AX6	Cyclin-dependent kinase 12	Cdk12	S	677	0.763177	0.936202	0.00602857	0.960254	0.956967	0.938126	1	0.968948	0.962209
Q14AX6	Q14AX6	Cyclin-dependent kinase 12	Cdk12	S	681	0.763177	0.936202	0.00602857	0.960254	0.956967	0.938126	1	0.968948	0.962209
Q14AX6	Q14AX6	Cyclin-dependent kinase 12	Cdk12	S	381	0.373787	0.89301	0.105508	0.76486	0.696886	0.943837	0.898292	0	1
Q14AX6	Q14AX6	Cyclin-dependent kinase 12	Cdk12	S	382	0.377794	0.894204	-0.066934	0.921395	0.909299	0.695732	0.914706	1	0.769958
Q14AX6	Q14AX6	Cyclin-dependent kinase 12	Cdk12	S	384	0.941358	0.945113	-0.00177854	0.947257	0.928679	0.899882	0.970201	1	0.954852
Q69ZA1	Q69ZA1	Cyclin-dependent kinase 13	Cdk13	S	664	0.964554	0.946081	-0.00204494	0.987133	0.984085	0.984168	0.980014	1	0.794978
Q69ZA1	Q69ZA1	Cyclin-dependent kinase 13	Cdk13	S	384	0.245652	0.852772	-0.0286147	1	0.94689	0.889752	0.952628	0.98509	0.966967
Q69ZA1	Q69ZA1	Cyclin-dependent kinase 13	Cdk13	S	867	0.0503917	0.437938	-0.206549	1	0.8995	0	0	0.866122	0
Q69ZA1	Q69ZA1	Cyclin-dependent kinase 13	Cdk13	T	1245	0.982913	0.946819	-0.000365882	0.966548	1	0.975589	0.989778	0.949486	0.94546
Q69ZA1	Q69ZA1	Cyclin-dependent kinase 13	Cdk13	T	871	0.879822	0.942359	0.00290345	0.975774	0.918646	0.948072	0.957054	0.981666	1
O35495	O35495	Cyclin-dependent kinase 14	Cdk14	S	95	0.833838	0.939273	-0.0219318	0.870472	0	0	0.807466	1	0
Q04735	Q04735	Cyclin-dependent kinase 16	Cdk16	S	138	0.633639	0.926989	-0.0260997	1	0.856437	0.867162	0.866623	0.78756	0
Q04735;Q8K0D0	Q04735	Cyclin-dependent kinase 16;Cyclin-dependent kinase 17	Cdk16;Cdk17	S	119;146	0.765757	0.936364	-0.00728875	0.977171	0.96351	1	0.912991	0.984912	0.937873
Q04735	Q04735	Cyclin-dependent kinase 16	Cdk16	S	153	0.397946	0.898311	-0.0246371	0.973803	1	0.884364	0.997778	0.978967	0.952148
Q8K0D0	Q8K0D0	Cyclin-dependent kinase 17	Cdk17	S	137	0.0172385	0.0812388	-0.169287	0.994819	1	0.737456	0	0.932484	0.764088
Q04899	Q04899	Cyclin-dependent kinase 18	Cdk18	S	109	0.445477	0.906322	-0.016783	0.949536	1	0.970855	0.919266	0.98801	0.979291
Q04899	Q04899	Cyclin-dependent kinase 18	Cdk18	S	66	0.0171763	0.085718	-0.127356	0.862197	1	0	0	0	0
P30285	P30285	Cyclin-dependent kinase 4	Cdk4	S	300	0.534846	0.91797	-0.0201375	0.991528	0.874286	0.841017	0.942894	0.998631	1
Q99J95	Q99J95	Cyclin-dependent kinase 9	Cdk9	T	186	0.984187	0.946871	-0.00256185	0.827986	0.770211	0.814608	0.772575	1	0.247288
P46414	P46414	Cyclin-dependent kinase inhibitor 1B	Cdkn1b	S	10	0.208918	0.834745	-0.117965	0.768184	0.846958	0	0.746814	1	0.736046
A2A6T1	A2A6T1	Cerebellar degeneration-related protein 2-like	Cdr2l	S	179	0.673192	0.930271	-0.00802087	0.992866	1	0.989665	0.977886	0.968559	0.921245
Q99L43	Q99L43	Phosphatidate cytidylyltransferase 2	Cds2	S	20	0.901403	0.943153	0.00053527	0.993385	0	0.998574	0	1	0.966995
Q99L43	Q99L43	Phosphatidate cytidylyltransferase 2	Cds2	S	22	0.895325	0.942983	0.00140214	0.993385	0	0.998574	0	1	0.966995
Q99L43	Q99L43	Phosphatidate cytidylyltransferase 2	Cds2	S	32	0.161855	0.792765	-0.110688	0.978617	0.953093	0.609055	0.931143	0.944189	1
Q4VAA2	Q4VAA2	Protein CDV3	Cdv3	S	51	0.125177	0.743343	-0.1082	1	0.999822	0	0.934325	0.969183	0.981757
Q4VAA2	Q4VAA2	Protein CDV3	Cdv3	Y	213	0.214368	0.835687	-0.0259273	0.975275	0.960988	0.950159	0.90188	1	0.992238
Q9WTK2	Q9WTK2	Chromodomain Y-like protein	Cdyl	S	196	0.155402	0.785544	0.0566888	0.862198	0.824082	0.926181	1	0.822802	0.984908
P28033	P28033	CCAAT/enhancer-binding protein beta	Cebpb	S	184	0.455945	0.907744	-0.00734618	0	0	0	0	1	0.96077
Q00322	Q00322	CCAAT/enhancer-binding protein delta	Cebpd	S	10	0.995579	0.947318	8.8724e-05	0.98014	1	0.997711	0.982722	0.96489	0.972504
P53569	P53569	CCAAT/enhancer-binding protein zeta	Cebpz	S	670	0.12884	0.750288	0.127867	0.902997	0	1	0.944377	0.913922	0.98571
P53569	P53569	CCAAT/enhancer-binding protein zeta	Cebpz	S	2	0.853822	0.941499	0.00484322	1	0.88882	0.986656	0.931646	0	0
P49452	P49452	Centromere protein C	Cenpc	S	158	0.126848	0.744881	0.0669298	0.710969	0.880183	0.883855	1	0.764808	0.757832
Q3TJM4	Q3TJM4	Centromere protein T	Cenpt	S	279	0.705551	0.932813	0.029878	0.839957	0.909154	1	0.857771	0	0.797309
Q8C4M7	Q8C4M7	Centromere protein U	Cenpu	S	164	0.019365	0.107802	-0.0587687	0.963303	1	0.880867	0.862946	0.88421	0.88161
Q62036	Q62036	Centrosomal protein of 131 kDa	Cep131	S	78	0.149242	0.78103	-0.0662242	1	0.917622	0.896501	0	0	0
Q6A065	Q6A065	Centrosomal protein of 170 kDa	Cep170	S	1564	0.770256	0.936636	-0.0101527	0.927422	0.95836	1	0.847236	0.799252	0.843804
Q6A065	Q6A065	Centrosomal protein of 170 kDa	Cep170	S	1102	0.585708	0.923007	-0.00992315	0.960692	1	0.972136	0.95577	0.966685	0.978522
Q6A065	Q6A065	Centrosomal protein of 170 kDa	Cep170	S	829	0.619873	0.926028	-0.0081724	0.995855	1	0.985209	0.987597	0.957188	0.980966
Q6A065	Q6A065	Centrosomal protein of 170 kDa	Cep170	S	443	0.483636	0.911687	-0.0133854	1	0.983653	0.953908	0.989643	0.966578	0.945169
Q6A065	Q6A065	Centrosomal protein of 170 kDa	Cep170	S	1515	0.138171	0.762918	-0.135568	1	0.992062	0.926236	0	0.761246	0.632618
Q6A065	Q6A065	Centrosomal protein of 170 kDa	Cep170	S	1384	0.102415	0.693032	-0.139831	0.999268	1	0	0.906892	0.972257	0.931962
Q6A065	Q6A065	Centrosomal protein of 170 kDa	Cep170	S	1048	0.613523	0.925592	-0.019778	0.921076	0.994369	0.844012	1	0.990565	0.957043
Q6A065	Q6A065	Centrosomal protein of 170 kDa	Cep170	S	1407	0.150185	0.779292	0.0344673	0.86359	0.907872	1	0.938132	0.838495	0.780019
Q6A065	Q6A065	Centrosomal protein of 170 kDa	Cep170	T	1405	0.0408405	0.363659	0.0927846	0.644442	0.840147	1	0.977253	0.794821	0.893529
Q6A065	Q6A065	Centrosomal protein of 170 kDa	Cep170	S	870	0.238915	0.849458	-0.042918	1	0.867468	0.842339	0.867251	0.906186	0.970533
Q6A065	Q6A065	Centrosomal protein of 170 kDa	Cep170	S	872	0.130089	0.750328	0.112472	0.890157	0.707103	0.983819	0.996821	0.777475	1
Q6A065	Q6A065	Centrosomal protein of 170 kDa	Cep170	S	378	0.788825	0.937702	-0.0126249	0.818992	1	0.917376	0.855417	0.848383	0.962765
Q6A065	Q6A065	Centrosomal protein of 170 kDa	Cep170	S	1152	0.460581	0.90802	0.141492	0	0	0	0.911833	1	0
Q6A065	Q6A065	Centrosomal protein of 170 kDa	Cep170	S	1155	0.893503	0.943005	-0.00571369	0.972984	1	0.974783	0.979617	0.775408	0.951142
Q6A065	Q6A065	Centrosomal protein of 170 kDa	Cep170	S	1157	0.950823	0.945519	-0.00609739	0.954889	1	0.994925	0.936807	0	0.973846
Q6A065	Q6A065	Centrosomal protein of 170 kDa	Cep170	S	1188	0.799916	0.938288	-0.00427224	0.986279	1	0.979493	0.991807	0.960879	0.929172
Q80U49	Q80U49	Centrosomal protein of 170 kDa protein B	Cep170b	S	1122	0.381702	0.89499	0.0161343	0.952954	0.952529	0.971747	1	0.916536	0.959668
Q80U49	Q80U49	Centrosomal protein of 170 kDa protein B	Cep170b	S	1341	0.533958	0.917376	0.0455048	0	0	0	1	0.928648	0
Q80U49	Q80U49	Centrosomal protein of 170 kDa protein B	Cep170b	S	881	0.907202	0.943624	0.00305001	0.92562	0.975339	1	0.912633	0.968529	0.918153
Q80U49	Q80U49	Centrosomal protein of 170 kDa protein B	Cep170b	S	882	0.656343	0.929036	-0.0109865	0.979346	0.975339	1	0.912633	0.968529	0.918153
Q80U49	Q80U49	Centrosomal protein of 170 kDa protein B	Cep170b	S	1283	0.83271	0.939553	-0.0128664	1	0	0.951362	0	0.971907	0.711862
Q80U49	Q80U49	Centrosomal protein of 170 kDa protein B	Cep170b	T	1289	0.862164	0.942302	0.00775448	0.823292	0.714062	0	1	0.895026	0.890775
E9Q309	E9Q309	NA	Cep350	S	874	0.498652	0.914655	0.0508511	0	0.800772	1	0.676171	0.831824	0
E9Q309	E9Q309	NA	Cep350	S	2221	0.20098	0.826762	-0.137056	0.99403	1	0	0.982261	0.92672	0.968006
Q8BT07	Q8BT07	Centrosomal protein of 55 kDa	Cep55	S	40	0.819482	0.939368	0.0142738	0.744421	0.784281	0.794916	0.789383	1	0.679663
Q8BT07	Q8BT07	Centrosomal protein of 55 kDa	Cep55	S	428	0.101832	0.695086	0.127431	0.804758	0	0.833857	1	0	0
A9Q751	A9Q751	Cilia- and flagella-associated protein 221	Cfap221	T	736	0.471257	0.910161	-0.0235144	0.96615	1	0.877538	0.979292	0.895968	0.755318
Q5F201	Q5F201	Cilia- and flagella-associated protein 52	Cfap52	S	363	0.681682	0.930924	0.0143339	1	0.84092	0.94352	0.951154	0.792629	0.808787
Q5F201	Q5F201	Cilia- and flagella-associated protein 52	Cfap52	T	503	0.000537424	2.94151e-10	0.25124	0	0	0.996723	1	0	0
O88271	O88271	Craniofacial development protein 1	Cfdp1	S	203	0.119707	0.731786	0.0844211	0.923426	0.710983	1	0.990165	0.898549	0.765189
O88271	O88271	Craniofacial development protein 1	Cfdp1	S	246	0.922179	0.944282	-0.00169218	0.965135	1	0.974577	0.985145	0.949961	0.961642
P18760	P18760	Cofilin-1	Cfl1	S	3	0.0386231	0.341067	-0.0672991	1	0.998628	0.891227	0.857885	0.949878	0.860138
P18760	P18760	Cofilin-1	Cfl1	S	41	0.546117	0.921111	0.0305358	0	1	0.935753	0.884178	0.947335	0.926486
P45591	P45591	Cofilin-2	Cfl2	S	3	0.603698	0.924628	-0.00790783	0.99836	1	0.988929	0.990392	0.99314	0.99443
Q6AW69	Q6AW69	Cingulin-like protein 1	Cgnl1	S	252	0.156355	0.786037	0.156792	0.947904	0	0.99128	1	0.962781	0.982061
Q6AW69	Q6AW69	Cingulin-like protein 1	Cgnl1	S	415	0.435495	0.905109	-0.0352157	1	0.889557	0.833055	0.892606	0	0.819921
Q6AW69	Q6AW69	Cingulin-like protein 1	Cgnl1	S	416	0.804682	0.938647	-0.018641	0	1	0	0.937114	0.958934	0.955947
Q6AW69	Q6AW69	Cingulin-like protein 1	Cgnl1	S	284	0.143161	0.770061	0.050143	0.847376	0.964935	0.992906	1	0.938377	0.983351
Q6AW69	Q6AW69	Cingulin-like protein 1	Cgnl1	S	389	0.00970158	0.0187115	0.127482	0	0	0.888777	0.902255	0.856791	1
Q6AW69	Q6AW69	Cingulin-like protein 1	Cgnl1	S	392	0.133956	0.751492	-0.0414616	1	0.945396	0.87966	0.842043	0	0
Q9QWF0	Q9QWF0	Chromatin assembly factor 1 subunit A	Chaf1a	S	173	0.827765	0.939916	-0.0324805	0	1	0.887517	0	0.929151	0
Q8K327	Q8K327	Chromosome alignment-maintaining phosphoprotein 1	Champ1	S	532	0.0420737	0.37613	0.0540352	0.901803	0.947553	0.990941	1	0.943885	0.949664
Q8K327	Q8K327	Chromosome alignment-maintaining phosphoprotein 1	Champ1	S	405	0.130692	0.751218	0.0287214	0.937379	0.963978	0.992896	1	0.950657	0.955782
Q8K327	Q8K327	Chromosome alignment-maintaining phosphoprotein 1	Champ1	S	394	0.0367964	0.314927	0.161535	0	0	1	0.969403	0	0.910178
Q8K327	Q8K327	Chromosome alignment-maintaining phosphoprotein 1	Champ1	S	416	0.944171	0.945229	0.0011907	0.988044	0.989246	0.98102	1	0.947021	0.976075
Q8K327	Q8K327	Chromosome alignment-maintaining phosphoprotein 1	Champ1	S	464	0.106741	0.703698	-0.0322282	0.962426	0.925066	0.876724	0.888055	0.998835	1
Q8K327	Q8K327	Chromosome alignment-maintaining phosphoprotein 1	Champ1	T	593	0.360569	0.89169	0.0548045	0	0.995347	0.941634	1	0	0.830043
Q8K327	Q8K327	Chromosome alignment-maintaining phosphoprotein 1	Champ1	S	237	0.00813228	0.0116272	-0.163967	0.823943	0.889336	0	0	1	0.837997
Q8K327	Q8K327	Chromosome alignment-maintaining phosphoprotein 1	Champ1	S	254	0.209627	0.835159	-0.0785967	0.983229	0	0	0	0.981332	1
Q8K327	Q8K327	Chromosome alignment-maintaining phosphoprotein 1	Champ1	S	617	0.829486	0.939873	-0.0042276	0.943808	0.911269	0.909641	0.929606	0.94764	1
Q8K327	Q8K327	Chromosome alignment-maintaining phosphoprotein 1	Champ1	S	105	0.311166	0.877493	0.0605738	0.757379	0.95738	1	0.939772	0.970161	0.79301
Q8K327	Q8K327	Chromosome alignment-maintaining phosphoprotein 1	Champ1	S	204	0.911814	0.943829	-0.00271003	0.910212	0.985526	0.966337	0.917575	0.927021	1
Q8K327	Q8K327	Chromosome alignment-maintaining phosphoprotein 1	Champ1	S	237	0.586486	0.92317	0.0279935	0.881563	0.86198	0.846645	1	0.725123	0.912878
Q8K327	Q8K327	Chromosome alignment-maintaining phosphoprotein 1	Champ1	S	243	0.496893	0.913466	0.0638827	0	0.903825	0.795032	0.985762	0	1
Q8K327	Q8K327	Chromosome alignment-maintaining phosphoprotein 1	Champ1	S	254	0.499448	0.914702	-0.0709682	1	0.765346	0.987638	0	0.886891	0.869481
Q8K327	Q8K327	Chromosome alignment-maintaining phosphoprotein 1	Champ1	S	603	0.483335	0.911774	0.0510807	0.694678	0.911128	0.787683	0.991091	0.88147	1
Q8K327	Q8K327	Chromosome alignment-maintaining phosphoprotein 1	Champ1	S	272	0.236381	0.848169	-0.0464019	0.965429	1	0.826502	0.97233	0.865291	0.919257
Q91VN4	Q91VN4	MICOS complex subunit Mic25	Chchd6	S	164	0.559745	0.920579	-0.0288728	0.918804	0.766667	0.825093	0.642562	1	0.587773
Q91VN4	Q91VN4	MICOS complex subunit Mic25	Chchd6	T	166	0.559745	0.920579	-0.0288728	0.918804	0.766667	0.825093	0.642562	1	0.587773
P40201	P40201	Chromodomain-helicase-DNA-binding protein 1	Chd1	S	1678	0.205223	0.831788	0.127423	0.934053	0	0.999194	1	0.743716	0
E9PZM4	E9PZM4	Chromodomain-helicase-DNA-binding protein 2	Chd2	S	1365	0.0464623	0.433881	0.0953591	0	0.872465	1	0.991282	0.985159	0.976018
Q6PDQ2	Q6PDQ2	Chromodomain-helicase-DNA-binding protein 4	Chd4	S	1528	0.285216	0.869044	0.0222045	0.93026	0.978842	1	0.982577	0.979559	0.99862
A3KFM7	A3KFM7	Chromodomain-helicase-DNA-binding protein 6	Chd6	S	1357	0.555107	0.918593	-0.0275068	0	1	0	0	0.990709	0
Q09XV5	Q09XV5	Chromodomain-helicase-DNA-binding protein 8	Chd8	S	2213	0.374574	0.893911	-0.0882725	1	0.862892	0.90635	0	0.877604	0
Q8BYH8	Q8BYH8	Chromodomain-helicase-DNA-binding protein 9	Chd9	S	653	0.491156	0.913759	-0.075382	0.990259	0.987381	0.853197	0.817551	1	0
Q8BJF9	Q8BJF9	Charged multivesicular body protein 2b	Chmp2b	S	199	0.425049	0.902992	-0.0136029	0.980585	1	0.964392	0.977266	0.98368	0.995192
Q9CQ10	Q9CQ10	Charged multivesicular body protein 3	Chmp3	S	200	0.151843	0.781879	-0.16874	0.964467	1	0	0.924096	0.944762	0.856034
Q9D1P4	Q9D1P4	Cysteine and histidine-rich domain-containing protein 1	Chordc1	T	47	0.597531	0.923687	0.0292732	0	0	0	0.98349	1	0
Q9JKP8	Q9JKP8	Chromatin accessibility complex protein 1	Chrac1	S	122	0.837642	0.940286	0.00347728	0.963824	0.983549	0.97033	0.990106	0.970214	1
Q8BIW9	Q8BIW9	Chromosome transmission fidelity protein 18 homolog	Chtf18	S	70	0.384293	0.896149	0.102173	0	1	0.914826	0.913977	0.972825	0.888593
Q8WTY4	Q8WTY4	Anamorsin	Ciapin1	S	213	0.0929789	0.662597	-0.188213	0.961688	0.835717	0	0	0	1
Q924A2	Q924A2	Protein capicua homolog	Cic	S	20	0.70097	0.933427	0.000713793	0	1	0.993315	0	0.838238	0.879509
Q924A2	Q924A2	Protein capicua homolog	Cic	S	2147	0.94794	0.945388	-0.00106919	0.964739	0.943967	0.961623	0.943149	1	0.981044
Q924A2	Q924A2	Protein capicua homolog	Cic	S	2148	0.94794	0.945388	-0.00106919	0.964739	0.943967	0.961623	0.943149	1	0.981044
Q924A2	Q924A2	Protein capicua homolog	Cic	S	2247	0.00158861	5.57076e-06	-0.12723	0.982038	0.988209	0.699065	0.626349	0.97261	1
Q924A2	Q924A2	Protein capicua homolog	Cic	S	1080	0.314266	0.878733	0.112947	1	0	0.913296	0.987412	0.947905	0.881593
Q924A2	Q924A2	Protein capicua homolog	Cic	T	2283	0.194918	0.821136	-0.128661	1	0.99519	0.775058	0.663698	0.944581	0
Q924A2	Q924A2	Protein capicua homolog	Cic	S	2275	0.42016	0.902167	0.0138759	0.975195	0.964658	0.979141	1	0.955926	0.969463
Q924A2	Q924A2	Protein capicua homolog	Cic	S	2284	0.434872	0.904729	0.0382993	0.89854	0.964658	0.971638	1	0.78072	0.938346
Q924A2	Q924A2	Protein capicua homolog	Cic	T	2283	0.620411	0.927002	-0.0809062	0.968073	0	0.717871	0	1	0.875471
Q924A2	Q924A2	Protein capicua homolog	Cic	S	1807	0.201123	0.831497	-0.0918176	0.940397	0	0	0	0.943297	1
Q924A2	Q924A2	Protein capicua homolog	Cic	S	1809	0.593452	0.923794	-0.0137161	1	0.963569	0.954554	0.953419	0.947006	0.840301
Q924A2	Q924A2	Protein capicua homolog	Cic	S	766	0.256755	0.857845	0.022612	0.934322	0.951099	0.963628	1	0.91418	0.944087
Q9DA19	Q9DA19	Corepressor interacting with RBPJ 1	Cir1	S	202	0.698062	0.931714	-0.0286455	0.954017	0.905199	0.794618	0.919854	1	0
Q8BMK4	Q8BMK4	Cytoskeleton-associated protein 4	Ckap4	S	367	0.775711	0.936922	0.00463683	0.978715	0.997074	1	0.990829	0.970411	0.988898
Q80TV8	Q80TV8	CLIP-associating protein 1	Clasp1	S	1193	0.820126	0.939382	-0.00418766	0.976621	1	0.971057	0.992663	0.952369	0.984106
Q80TV8	Q80TV8	CLIP-associating protein 1	Clasp1	S	1088	0.93727	0.944935	-0.00126759	0.978759	0.961655	0.977597	0.958284	0.986087	1
Q80TV8	Q80TV8	CLIP-associating protein 1	Clasp1	S	598	0.884897	0.942607	0.00688606	0.806021	0.853131	0.871612	0.809197	0.822199	1
Q80TV8	Q80TV8	CLIP-associating protein 1	Clasp1	S	600	0.875561	0.942163	0.00391382	0.987466	0.938301	0.950037	0.987428	1	0.946364
Q80TV8	Q80TV8	CLIP-associating protein 1	Clasp1	S	794	0.00598314	0.00435878	-0.0766245	0.999509	1	0.874589	0.888933	0.943402	0.961066
Q80TV8	Q80TV8	CLIP-associating protein 1	Clasp1	S	636	0.218717	0.839108	-0.0964491	1	0.903846	0.942395	0	0.948672	0.972882
Q8BRT1	Q8BRT1	CLIP-associating protein 2	Clasp2	S	376	0.899438	0.942814	0.0112643	0.806386	0	0.853348	0	0.843239	1
Q8CFC7	Q8CFC7	CLK4-associating serine/arginine rich protein	Clasrp	S	335	0.987263	0.946991	0.000282664	0.997343	0.970824	0.969177	1	0.976741	0.954284
Q8CFC7	Q8CFC7	CLK4-associating serine/arginine rich protein	Clasrp	S	285	0.583896	0.922845	-0.0102853	0.956955	0.962181	0.933549	0.945901	1	0.944771
Q8CFC7	Q8CFC7	CLK4-associating serine/arginine rich protein	Clasrp	S	541	0.834557	0.940084	0.0196791	1	0.839542	0.966599	0.947715	0	0.928433
Q99LI2	Q99LI2	Chloride channel CLIC-like protein 1	Clcc1	S	497	0.585193	0.923474	0.0543254	0	0	0.826997	0	1	0
Q99LI2	Q99LI2	Chloride channel CLIC-like protein 1	Clcc1	S	58	0.499146	0.913798	0.0389422	0.982373	0.756804	0.987902	0.883918	0.961316	1
Q99LI2	Q99LI2	Chloride channel CLIC-like protein 1	Clcc1	S	59	0.420778	0.902543	0.110671	0	1	0.97459	0.974458	0	0.998691
Q99LI2	Q99LI2	Chloride channel CLIC-like protein 1	Clcc1	S	429	0.0590805	0.520801	0.173899	0	0	0.71687	1	0	0.725152
Q99LI2	Q99LI2	Chloride channel CLIC-like protein 1	Clcc1	S	433	0.0529002	0.470912	0.178247	0	0	0.71687	1	0	0.725152
Q5M6W3	Q5M6W3	Clathrin heavy chain linker domain-containing protein 1	Clhc1	Y	53	0.887228	0.942608	-0.00467114	0	0.972202	0	0.973037	0.95453	1
Q99KN9	Q99KN9	Clathrin interactor 1	Clint1	S	253	0.387349	0.895689	0.102071	0	0.987402	0.906534	1	0.850881	0.484174
Q922J3;Q9Z0H8	Q922J3	CAP-Gly domain-containing linker protein 1;CAP-Gly domain-containing linker protein 2	Clip1;Clip2	S	347;353	0.943723	0.945209	0.00114926	0.984816	0.992793	1	0.981169	0.998149	0.980029
Q922J3	Q922J3	CAP-Gly domain-containing linker protein 1	Clip1	S	194	0.298965	0.874027	-0.128058	0.96118	0.929966	0.994002	0	0.98605	1
Q922J3	Q922J3	CAP-Gly domain-containing linker protein 1	Clip1	S	199	0.835676	0.940519	-0.021985	0	0.696827	0.627621	0	1	0
Q922J3	Q922J3	CAP-Gly domain-containing linker protein 1	Clip1	S	203	0.831009	0.939968	-0.0111125	0.945956	0.844578	0.892721	0.858362	0.783219	1
Q9Z0H8	Q9Z0H8	CAP-Gly domain-containing linker protein 2	Clip2	S	924	0.880929	0.942406	-0.00242738	0.97965	1	0.978924	0.993044	0.957271	0.967683
O35491	O35491	Dual specificity protein kinase CLK2	Clk2	S	141	0.684822	0.931155	0.0293474	0.852449	0.91986	0.890608	1	0.958314	0.594105
O35492	O35492	Dual specificity protein kinase CLK3	Clk3	S	157	0.242267	0.851112	-0.0449106	1	0.98532	0.917539	0.903071	0.963039	0.805145
O35493	O35493	Dual specificity protein kinase CLK4	Clk4	S	138	0.0572839	0.51679	-0.168155	0.985041	1	0	0	0.920622	0
O35493;P22518	O35493	Dual specificity protein kinase CLK4;Dual specificity protein kinase CLK1	Clk4;Clk1	S	339;340	0.222767	0.840782	-0.048252	0.937702	1	0.883376	0.888927	0.81678	0.956226
O35493;P22518	O35493	Dual specificity protein kinase CLK4;Dual specificity protein kinase CLK1	Clk4;Clk1	T	340;341	0.629031	0.926839	0.0587342	0.93055	0.863601	1	0.998067	0.923144	0
Q68FD5	Q68FD5	Clathrin heavy chain 1	Cltc	S	131	0.280022	0.869375	0.119752	0	0	0	0.832978	1	0.948808
Q68FD5	Q68FD5	Clathrin heavy chain 1	Cltc	T	118	0.269593	0.86563	0.123255	0	0	0	0.832978	1	0.948808
Q68FD5	Q68FD5	Clathrin heavy chain 1	Cltc	T	123	0.272388	0.867915	0.121437	0	0	0	0.832978	1	0.948808
Q8R3P7	Q8R3P7	Clusterin-associated protein 1	Cluap1	S	409	0.459976	0.908862	0.0913728	0.965642	0	0.867744	0.852188	1	0.826399
Q9DBC3	Q9DBC3	Cap-specific mRNA (nucleoside-2'-O-)-methyltransferase 1	Cmtr1	S	27	0.0411008	0.366396	-0.0464584	0.979256	1	0.935527	0.913176	0.970203	0.974537
Q9DBC3	Q9DBC3	Cap-specific mRNA (nucleoside-2'-O-)-methyltransferase 1	Cmtr1	S	27	0.911109	0.943802	-0.00627563	0.874873	0.819138	0.707374	0.964296	0.975823	1
Q9DBC3	Q9DBC3	Cap-specific mRNA (nucleoside-2'-O-)-methyltransferase 1	Cmtr1	S	28	0.48706	0.912268	-0.0351199	0.802612	0.90996	0.877127	0.719666	1	0.910634
Q9DBC3	Q9DBC3	Cap-specific mRNA (nucleoside-2'-O-)-methyltransferase 1	Cmtr1	S	30	0.0344974	0.295216	0.0812224	0.701381	0.744913	0.824784	0.934845	1	0.959602
Q9DBC3	Q9DBC3	Cap-specific mRNA (nucleoside-2'-O-)-methyltransferase 1	Cmtr1	T	29	0.990784	0.947165	-0.000958035	1	0.827234	0.915932	0.907198	0	0.97754
Q70KF4	Q70KF4	Cardiomyopathy-associated protein 5	Cmya5	S	1956	0.93964	0.945097	0.015712	0.949495	0	1	0	0	0
P53996	P53996	Cellular nucleic acid-binding protein	Cnbp	S	47	0.00270668	0.000126085	0.141394	0	0	1	0.961645	0.836663	0.924455
P53996	P53996	Cellular nucleic acid-binding protein	Cnbp	S	48	0.568173	0.921249	-0.0364659	0	0.882111	0	0	1	0
P53996	P53996	Cellular nucleic acid-binding protein	Cnbp	S	49	0.00631269	0.00521652	0.0912874	0.764394	0.827853	1	0.98537	0.902802	0.874205
Q69ZF7	Q69ZF7	Metal transporter CNNM4	Cnnm4	S	661	0.165057	0.796179	0.0675742	0.788238	0.748838	0.891975	0.926284	1	0.777948
Q8K0V4	Q8K0V4	CCR4-NOT transcription complex subunit 3	Cnot3	S	299	0.639447	0.927723	0.0130209	0.998712	0.879166	0.937951	0.997669	1	0.960096
Q8K0V4	Q8K0V4	CCR4-NOT transcription complex subunit 3	Cnot3	T	529	0.215113	0.836259	0.0315315	0.916381	0.907715	0.957476	1	0.90811	0.999134
Q8BT14	Q8BT14	CCR4-NOT transcription complex subunit 4	Cnot4	S	432	0.825562	0.939709	0.0289988	0.865781	0	0	1	0.88386	0.993947
Q8BT14	Q8BT14	CCR4-NOT transcription complex subunit 4	Cnot4	S	324	0.83068	0.93993	-0.00370699	0.994688	0.991943	1	0.972094	0.94091	0.978161
Q9QXT0	Q9QXT0	Protein canopy homolog 2	Cnpy2	S	115	0.123272	0.738518	-0.0598173	0.937415	1	0.904722	0.753854	0.973972	0.881122
Q8BQ47	Q8BQ47	Protein canopy homolog 4	Cnpy4	S	64	0.0358965	0.303972	-0.284775	1	0.98249	0	0	0.880419	0
Q3UMF0	Q3UMF0	Cordon-bleu protein-like 1	Cobll1	S	1028	0.571021	0.921697	-0.0293768	1	0.806105	0.947458	0.71708	0.846419	0.955526
Q3UMF0	Q3UMF0	Cordon-bleu protein-like 1	Cobll1	S	1092	0.212242	0.834457	-0.185647	0.89769	0.991145	0	0.933501	1	0.931668
Q3UMF0	Q3UMF0	Cordon-bleu protein-like 1	Cobll1	S	1266	0.450481	0.907177	0.0273206	0.907552	0.84159	0.86587	0.983204	0.917567	1
[truncated: 5,502 more rows]

## Sheet: sig_ISMvsINS_log_filter
proteins	protein	prot_name	gene	aa	pos	pval	padjval	fc	BSA_1	BSA_2	INS_1	INS_2	ISM1_1	ISM1_2
[truncated: 6,555 more rows]
