# Supplementary material for: Phosphoproteomic mapping reveals distinct signaling actions and activation of muscle protein synthesis by Isthmin-1
Source: eLife. 2022 Sep 28;11:e80014. doi: 10.7554/eLife.80014 (PMC9592085; doi:10.7554/eLife.80014)
Supplement: Figure 1—source data 2. [file elife-80014-fig1-data2.xlsx]

## Sheet: Detected phosphopeptides
gene	BSA	INS	ISM1	phospep	pathway	gene	AA	pos	protein
Osbpl8	TRUE	TRUE	TRUE	Osbpl8	IR signalling	Osbpl8	S	65	B9EJ86
Soga1	TRUE	TRUE	TRUE	Soga1	IR signalling	Soga1	S	1015	E1U8D0
Pak1	TRUE	TRUE	TRUE	Pak1	IR signalling	Pak1	S	115	O88643
Pak1.1	TRUE	TRUE	TRUE	Pak1.1	IR signalling	Pak1	S	204	O88643
Pak1.2	TRUE	TRUE	TRUE	Pak1.2	IR signalling	Pak1	S	144	O88643
Src	FALSE	TRUE	FALSE	Src	IR signalling	Src	S	74	P05480
Src.1	TRUE	TRUE	TRUE	Src.1	IR signalling	Src	S	17	P05480
Src.2	FALSE	TRUE	TRUE	Src.2	IR signalling	Src	S	21	P05480
Marcks	TRUE	TRUE	TRUE	Marcks	IR signalling	Marcks	S	138	P26645
Marcks.1	FALSE	FALSE	TRUE	Marcks.1	IR signalling	Marcks	S	140	P26645
Marcks.2	FALSE	TRUE	TRUE	Marcks.2	IR signalling	Marcks	S	141	P26645
Marcks.3	FALSE	TRUE	TRUE	Marcks.3	IR signalling	Marcks	S	112	P26645
Marcks.4	FALSE	TRUE	TRUE	Marcks.4	IR signalling	Marcks	S	113	P26645
Marcks.5	TRUE	TRUE	TRUE	Marcks.5	IR signalling	Marcks	S	27	P26645
Marcks.6	TRUE	TRUE	TRUE	Marcks.6	IR signalling	Marcks	S	160	P26645
Marcks.7	TRUE	TRUE	TRUE	Marcks.7	IR signalling	Marcks	S	163	P26645
Prkcd	TRUE	TRUE	TRUE	Prkcd	IR signalling	Prkcd	S	504	P28867
Prkcd.1	TRUE	TRUE	FALSE	Prkcd.1	IR signalling	Prkcd	S	662	P28867
Prkcd.2	TRUE	TRUE	TRUE	Prkcd.2	IR signalling	Prkcd	S	643	P28867
Prkcd.3	TRUE	TRUE	TRUE	Prkcd.3	IR signalling	Prkcd	S	645	P28867
Prkcd.4	TRUE	TRUE	TRUE	Prkcd.4	IR signalling	Prkcd	S	130	P28867
Cdk4	TRUE	TRUE	TRUE	Cdk4	IR signalling	Cdk4	S	300	P30285
Irs1	TRUE	TRUE	TRUE	Irs1	IR signalling	Irs1	S	3	P35569
Irs1.1	TRUE	TRUE	TRUE	Irs1.1	IR signalling	Irs1	S	1097	P35569
Irs1.2	FALSE	TRUE	TRUE	Irs1.2	IR signalling	Irs1	S	1213	P35569
Irs1.3	TRUE	TRUE	TRUE	Irs1.3	IR signalling	Irs1	S	1214	P35569
Irs1.4	TRUE	TRUE	TRUE	Irs1.4	IR signalling	Irs1	S	887	P35569
Irs1.5	TRUE	TRUE	TRUE	Irs1.5	IR signalling	Irs1	S	1074	P35569
Ptpn1	TRUE	TRUE	TRUE	Ptpn1	IR signalling	Ptpn1	S	335	P35821
Ptpn1.1	TRUE	TRUE	TRUE	Ptpn1.1	IR signalling	Ptpn1	S	392	P35821
Ptpn1.2	TRUE	TRUE	TRUE	Ptpn1.2	IR signalling	Ptpn1	S	50	P35821
Ybx1	TRUE	TRUE	TRUE	Ybx1	IR signalling	Ybx1	S	311	P62960
Ybx1.1	TRUE	TRUE	TRUE	Ybx1.1	IR signalling	Ybx1	S	312	P62960
Ybx1.2	TRUE	TRUE	TRUE	Ybx1.2	IR signalling	Ybx1	S	163	P62960
Ybx1.3	FALSE	TRUE	TRUE	Ybx1.3	IR signalling	Ybx1	S	165	P62960
Ybx1.4	TRUE	TRUE	TRUE	Ybx1.4	IR signalling	Ybx1	S	172	P62960
Ybx1.5	TRUE	TRUE	TRUE	Ybx1.5	IR signalling	Ybx1;Ybx2;Ybx3	S	100;139;126	Q9JKB3
Irs2	TRUE	TRUE	FALSE	Irs2	IR signalling	Irs2	S	615	P81122
Irs2.1	TRUE	TRUE	TRUE	Irs2.1	IR signalling	Irs2	S	616	P81122
Irs2.2	FALSE	FALSE	TRUE	Irs2.2	IR signalling	Irs2	S	588	P81122
Irs2.3	TRUE	TRUE	FALSE	Irs2.3	IR signalling	Irs2	S	590	P81122
Irs2.4	TRUE	TRUE	TRUE	Irs2.4	IR signalling	Irs2	S	556	P81122
Irs2.5	FALSE	TRUE	TRUE	Irs2.5	IR signalling	Irs2	S	675	P81122
Irs2.6	FALSE	TRUE	TRUE	Irs2.6	IR signalling	Irs2	S	515	P81122
Irs2.7	TRUE	TRUE	TRUE	Irs2.7	IR signalling	Irs2	S	573	P81122
Irs2.8	TRUE	TRUE	TRUE	Irs2.8	IR signalling	Irs2	S	1089	P81122
Srsf3	TRUE	TRUE	TRUE	Srsf3	IR signalling	Srsf3	S	5	P84104
Smarcc1	TRUE	TRUE	FALSE	Smarcc1	IR signalling	Smarcc1	S	327	P97496
Smarcc1.1	TRUE	TRUE	FALSE	Smarcc1.1	IR signalling	Smarcc1	S	329	P97496
Smarcc1.2	TRUE	TRUE	TRUE	Smarcc1.2	IR signalling	Smarcc1	S	309	P97496
Shc1	TRUE	TRUE	TRUE	Shc1	IR signalling	Shc1	S	422	P98083
Shc1.1	TRUE	TRUE	TRUE	Shc1.1	IR signalling	Shc1	S	139	P98083
Ptpn2	FALSE	TRUE	TRUE	Ptpn2	IR signalling	Ptpn2	S	298	Q06180
Gsk3a	TRUE	TRUE	TRUE	Gsk3a	IR signalling	Gsk3a;Gsk3b	S	278;215	Q2NL51
Prkaa1	FALSE	TRUE	TRUE	Prkaa1	IR signalling	Prkaa1	S	356	Q5EG47
Prkaa1.1	FALSE	FALSE	TRUE	Prkaa1.1	IR signalling	Prkaa1	S	486	Q5EG47
Grb10	TRUE	TRUE	TRUE	Grb10	IR signalling	Grb10	S	503	Q60760
Grb10.1	FALSE	FALSE	TRUE	Grb10.1	IR signalling	Grb10	S	453	Q60760
Grb10.2	TRUE	FALSE	TRUE	Grb10.2	IR signalling	Grb10	S	455	Q60760
Grb10.3	TRUE	TRUE	TRUE	Grb10.3	IR signalling	Grb10	S	96	Q60760
Eif4ebp1	TRUE	TRUE	TRUE	Eif4ebp1	IR signalling	Eif4ebp1	S	64	Q60876
Eif4ebp1.1	TRUE	TRUE	TRUE	Eif4ebp1.1	IR signalling	Eif4ebp1	S	2	Q60876
Eif4ebp1.2	FALSE	FALSE	TRUE	Eif4ebp1.2	IR signalling	Eif4ebp1	S	5	Q60876
Tsc2	FALSE	FALSE	TRUE	Tsc2	IR signalling	Tsc2	S	1805	Q61037
Tsc2.1	TRUE	TRUE	TRUE	Tsc2.1	IR signalling	Tsc2	S	1806	Q61037
Tsc2.2	TRUE	TRUE	TRUE	Tsc2.2	IR signalling	Tsc2	S	981	Q61037
Tsc2.3	TRUE	TRUE	FALSE	Tsc2.3	IR signalling	Tsc2	S	1419	Q61037
Tsc2.4	TRUE	TRUE	TRUE	Tsc2.4	IR signalling	Tsc2	S	1421	Q61037
Apc	TRUE	TRUE	TRUE	Apc	IR signalling	Apc	S	778	Q61315
Apc.1	TRUE	TRUE	TRUE	Apc.1	IR signalling	Apc	S	2283	Q61315
Apc.2	TRUE	FALSE	FALSE	Apc.2	IR signalling	Apc	S	1036	Q61315
Apc.3	FALSE	FALSE	TRUE	Apc.3	IR signalling	Apc	S	1040	Q61315
Foxc2	TRUE	TRUE	TRUE	Foxc2	IR signalling	Foxc2	S	218	Q61850
Foxc2.1	TRUE	TRUE	TRUE	Foxc2.1	IR signalling	Foxc2	S	239	Q61850
Sorbs1	TRUE	TRUE	TRUE	Sorbs1	IR signalling	Sorbs1	S	185	Q62417
Sorbs1.1	TRUE	TRUE	TRUE	Sorbs1.1	IR signalling	Sorbs1	S	432	Q62417
Zbtb7b	TRUE	TRUE	TRUE	Zbtb7b	IR signalling	Zbtb7b	S	3	Q64321
Zbtb7b.1	FALSE	TRUE	TRUE	Zbtb7b.1	IR signalling	Zbtb7b	S	150	Q64321
Slc39a14	TRUE	FALSE	FALSE	Slc39a14	IR signalling	Slc39a14	S	306	Q75N73
C2cd5	TRUE	TRUE	TRUE	C2cd5	IR signalling	C2cd5	S	817	Q7TPS5
C2cd5.1	TRUE	TRUE	TRUE	C2cd5.1	IR signalling	C2cd5	S	259	Q7TPS5
C2cd5.2	TRUE	FALSE	TRUE	C2cd5.2	IR signalling	C2cd5	S	260	Q7TPS5
Nucks1	TRUE	TRUE	TRUE	Nucks1	IR signalling	Nucks1	S	181	Q80XU3
Nucks1.1	TRUE	TRUE	TRUE	Nucks1.1	IR signalling	Nucks1	S	79	Q80XU3
Nucks1.2	TRUE	TRUE	TRUE	Nucks1.2	IR signalling	Nucks1	S	214	Q80XU3
Nucks1.3	TRUE	TRUE	TRUE	Nucks1.3	IR signalling	Nucks1	S	19	Q80XU3
Nucks1.4	TRUE	TRUE	TRUE	Nucks1.4	IR signalling	Nucks1	S	58	Q80XU3
Rps6kb1	TRUE	TRUE	TRUE	Rps6kb1	IR signalling	Rps6kb1	S	447	Q8BSK8
Sik2	TRUE	TRUE	TRUE	Sik2	IR signalling	Sik2	S	587	Q8CFH6
Tns2	FALSE	FALSE	TRUE	Tns2	IR signalling	Tns2	S	830	Q8CGB6
Tns2.1	TRUE	TRUE	TRUE	Tns2.1	IR signalling	Tns2	S	832	Q8CGB6
Tns2.2	TRUE	TRUE	TRUE	Tns2.2	IR signalling	Tns2	S	811	Q8CGB6
Tns2.3	TRUE	TRUE	FALSE	Tns2.3	IR signalling	Tns2	S	874	Q8CGB6
Tns2.4	TRUE	FALSE	TRUE	Tns2.4	IR signalling	Tns2	S	915	Q8CGB6
Tns2.5	TRUE	TRUE	TRUE	Tns2.5	IR signalling	Tns2	S	481	Q8CGB6
Tns2.6	TRUE	FALSE	FALSE	Tns2.6	IR signalling	Tns2	S	1082	Q8CGB6
Tns2.7	TRUE	TRUE	TRUE	Tns2.7	IR signalling	Tns2	S	1087	Q8CGB6
Tns2.8	TRUE	TRUE	TRUE	Tns2.8	IR signalling	Tns2	S	941	Q8CGB6
Tns2.9	TRUE	TRUE	TRUE	Tns2.9	IR signalling	Tns2	S	931	Q8CGB6
Tns2.10	TRUE	FALSE	FALSE	Tns2.10	IR signalling	Tns2	S	118	Q8CGB6
Tns2.11	TRUE	TRUE	TRUE	Tns2.11	IR signalling	Tns2	S	120	Q8CGB6
Tns2.12	TRUE	TRUE	TRUE	Tns2.12	IR signalling	Tns2	S	1003	Q8CGB6
Phip	TRUE	TRUE	TRUE	Phip	IR signalling	Phip	S	1315	Q8VDD9
Phip.1	TRUE	TRUE	TRUE	Phip.1	IR signalling	Phip	S	1783	Q8VDD9
Phip.2	TRUE	TRUE	TRUE	Phip.2	IR signalling	Phip	S	1476	Q8VDD9
Phip.3	TRUE	TRUE	TRUE	Phip.3	IR signalling	Phip	S	674	Q8VDD9
Ncoa5	TRUE	TRUE	FALSE	Ncoa5	IR signalling	Ncoa5	S	377	Q91W39
Ncoa5.1	TRUE	TRUE	TRUE	Ncoa5.1	IR signalling	Ncoa5	S	378	Q91W39
Ncoa5.2	FALSE	TRUE	FALSE	Ncoa5.2	IR signalling	Ncoa5	S	381	Q91W39
Ncoa5.3	FALSE	TRUE	FALSE	Ncoa5.3	IR signalling	Ncoa5	S	6	Q91W39
Ncoa5.4	TRUE	TRUE	TRUE	Ncoa5.4	IR signalling	Ncoa5	S	9	Q91W39
Sirt1	TRUE	TRUE	TRUE	Sirt1	IR signalling	Sirt1	S	14	Q923E4
Sirt1.1	TRUE	TRUE	TRUE	Sirt1.1	IR signalling	Sirt1	S	16	Q923E4
Nck1	TRUE	TRUE	TRUE	Nck1	IR signalling	Nck1	S	166	Q99M51
Nck1.1	TRUE	TRUE	TRUE	Nck1.1	IR signalling	Nck1	S	85	Q99M51
Baiap2l1	TRUE	TRUE	TRUE	Baiap2l1	IR signalling	Baiap2l1	S	281	Q9DBJ3
Sh2b2	TRUE	TRUE	TRUE	Sh2b2	IR signalling	Sh2b2	S	106	Q9JID9
Sh2b2.1	TRUE	TRUE	TRUE	Sh2b2.1	IR signalling	Sh2b2	S	107	Q9JID9
Grb14	FALSE	TRUE	TRUE	Grb14	IR signalling	Grb14	S	20	Q9JLM9
Grb14.1	TRUE	TRUE	TRUE	Grb14.1	IR signalling	Grb14	S	86	Q9JLM9
Grb14.2	TRUE	TRUE	TRUE	Grb14.2	IR signalling	Grb14	S	49	Q9JLM9
Foxo1	TRUE	TRUE	TRUE	Foxo1	IR signalling	Foxo1	S	284	Q9R1E0
Cav2	TRUE	TRUE	TRUE	Cav2	IR signalling	Cav2	S	23	Q9WVC3
Pak1.3	TRUE	TRUE	TRUE	Pak1.3	IR signalling	Pak1	T	225	O88643
Pak1.4	TRUE	FALSE	FALSE	Pak1.4	IR signalling	Pak1	T	229	O88643
Pak1.5	TRUE	FALSE	TRUE	Pak1.5	IR signalling	Pak1	T	230	O88643
Pak1.6	TRUE	TRUE	TRUE	Pak1.6	IR signalling	Pak1	T	212	O88643
Prkca	TRUE	TRUE	TRUE	Prkca	IR signalling	Prkca	T	638	P20444
Prkca.1	TRUE	TRUE	TRUE	Prkca.1	IR signalling	Prkca;Prkcb;Prkcg	T	497;500;514	P20444
Marcks.8	TRUE	TRUE	TRUE	Marcks.8	IR signalling	Marcks	T	143	P26645
Marcks.9	TRUE	FALSE	TRUE	Marcks.9	IR signalling	Marcks	T	181	P26645
Prkcd.5	TRUE	TRUE	TRUE	Prkcd.5	IR signalling	Prkcd	T	218	P28867
Irs2.9	TRUE	TRUE	TRUE	Irs2.9	IR signalling	Irs2	T	517	P81122
Irs2.10	TRUE	TRUE	TRUE	Irs2.10	IR signalling	Irs2	T	524	P81122
Irs2.11	FALSE	TRUE	FALSE	Irs2.11	IR signalling	Irs2	T	347	P81122
Prkaa1.2	FALSE	TRUE	FALSE	Prkaa1.2	IR signalling	Prkaa1	T	355	Q5EG47
Prkaa1.3	TRUE	TRUE	TRUE	Prkaa1.3	IR signalling	Prkaa1;Prkaa2	T	183;172	Q5EG47
Akt2	TRUE	TRUE	TRUE	Akt2	IR signalling	Akt2	T	451	Q60823
Eif4ebp1.3	TRUE	TRUE	TRUE	Eif4ebp1.3	IR signalling	Eif4ebp1	T	69	Q60876
Eif4ebp1.4	TRUE	TRUE	TRUE	Eif4ebp1.4	IR signalling	Eif4ebp1	T	45	Q60876
Bcar1	TRUE	TRUE	TRUE	Bcar1	IR signalling	Bcar1	T	330	Q61140
Bcar1.1	TRUE	TRUE	TRUE	Bcar1.1	IR signalling	Bcar1	T	389	Q61140
Sorbs1.2	TRUE	TRUE	TRUE	Sorbs1.2	IR signalling	Sorbs1	T	184	Q62417
Sorbs1.3	FALSE	TRUE	FALSE	Sorbs1.3	IR signalling	Sorbs1	T	435	Q62417
C2cd5.3	TRUE	TRUE	TRUE	C2cd5.3	IR signalling	C2cd5	T	818	Q7TPS5
Rps6kb1.1	FALSE	FALSE	TRUE	Rps6kb1.1	IR signalling	Rps6kb1	T	444	Q8BSK8
Tns2.13	TRUE	TRUE	TRUE	Tns2.13	IR signalling	Tns2	T	937	Q8CGB6
Ncoa5.5	FALSE	FALSE	TRUE	Ncoa5.5	IR signalling	Ncoa5	T	11	Q91W39
Insr	FALSE	TRUE	TRUE	Insr	IR signalling	Insr;Igf1r	Y	1175;1163	P15208
Ptpra	TRUE	TRUE	TRUE	Ptpra	IR signalling	Ptpra	Y	825	P18052
Prkcd.6	TRUE	TRUE	TRUE	Prkcd.6	IR signalling	Prkcd	Y	311	P28867
Ptpn11	TRUE	TRUE	TRUE	Ptpn11	IR signalling	Ptpn11	Y	584	P35235
Fer	TRUE	TRUE	TRUE	Fer	IR signalling	Fer	Y	715	P70451
Fer.1	TRUE	TRUE	TRUE	Fer.1	IR signalling	Fer	Y	402	P70451
Shc1.2	TRUE	TRUE	TRUE	Shc1.2	IR signalling	Shc1	Y	423	P98083
Gsk3a.1	TRUE	TRUE	TRUE	Gsk3a.1	IR signalling	Gsk3a;Gsk3b	Y	279;216	Q2NL51
Bcar1.2	TRUE	TRUE	TRUE	Bcar1.2	IR signalling	Bcar1	Y	253	Q61140
Bcar1.3	TRUE	TRUE	TRUE	Bcar1.3	IR signalling	Bcar1	Y	391	Q61140
Bcar1.4	TRUE	TRUE	TRUE	Bcar1.4	IR signalling	Bcar1	Y	414	Q61140
Tns2.14	TRUE	TRUE	TRUE	Tns2.14	IR signalling	Tns2	Y	483	Q8CGB6
Tns2.15	TRUE	TRUE	TRUE	Tns2.15	IR signalling	Tns2	Y	705	Q8CGB6
Prkca.2	TRUE	TRUE	TRUE	Prkca.2	IR signalling	Prkca	S	657	P20444
Marcks.10	TRUE	TRUE	TRUE	Marcks.10	IR signalling	Marcks	S	160	P26645
Srsf3.1	FALSE	TRUE	TRUE	Srsf3.1	IR signalling	Srsf3	S	138	P84104
Srsf3.2	FALSE	TRUE	TRUE	Srsf3.2	IR signalling	Srsf3	S	140	P84104
Smarcc1.3	TRUE	TRUE	TRUE	Smarcc1.3	IR signalling	Smarcc1	S	327	P97496
Smarcc1.4	TRUE	TRUE	TRUE	Smarcc1.4	IR signalling	Smarcc1	S	329	P97496
Foxc2.2	TRUE	TRUE	TRUE	Foxc2.2	IR signalling	Foxc2	S	239	Q61850
Tns2.16	FALSE	FALSE	TRUE	Tns2.16	IR signalling	Tns2	S	830	Q8CGB6
Tns2.17	FALSE	FALSE	TRUE	Tns2.17	IR signalling	Tns2	S	832	Q8CGB6
Phip.4	TRUE	TRUE	TRUE	Phip.4	IR signalling	Phip	S	1281	Q8VDD9
Phip.5	TRUE	TRUE	TRUE	Phip.5	IR signalling	Phip	S	1283	Q8VDD9
Ncoa5.6	TRUE	TRUE	TRUE	Ncoa5.6	IR signalling	Ncoa5	S	29	Q91W39
Ncoa5.7	TRUE	TRUE	TRUE	Ncoa5.7	IR signalling	Ncoa5	S	34	Q91W39
Ncoa5.8	TRUE	TRUE	TRUE	Ncoa5.8	IR signalling	Ncoa5	S	377	Q91W39
Ncoa5.9	FALSE	TRUE	FALSE	Ncoa5.9	IR signalling	Ncoa5	S	378	Q91W39
Ncoa5.10	TRUE	TRUE	TRUE	Ncoa5.10	IR signalling	Ncoa5	S	381	Q91W39
Cav2.1	TRUE	TRUE	TRUE	Cav2.1	IR signalling	Cav2	S	20	Q9WVC3
Cav2.2	TRUE	TRUE	TRUE	Cav2.2	IR signalling	Cav2	S	23	Q9WVC3
Prkca.3	TRUE	TRUE	TRUE	Prkca.3	IR signalling	Prkca	T	638	P20444
Eif4ebp2	FALSE	FALSE	TRUE	Eif4ebp2	IR signalling	Eif4ebp2	T	37	P70445
Eif4ebp2.1	TRUE	TRUE	TRUE	Eif4ebp2.1	IR signalling	Eif4ebp2	T	46	P70445
Eif4ebp1.5	FALSE	TRUE	FALSE	Eif4ebp1.5	IR signalling	Eif4ebp1	T	35	Q60876
Eif4ebp1.6	TRUE	TRUE	TRUE	Eif4ebp1.6	IR signalling	Eif4ebp1	T	36	Q60876
Eif4ebp1.7	TRUE	TRUE	TRUE	Eif4ebp1.7	IR signalling	Eif4ebp1	T	45	Q60876
Eif4ebp2.2	TRUE	TRUE	FALSE	Eif4ebp2.2	IR signalling	Eif4ebp2	Y	34	P70445
Eif4ebp1.8	TRUE	TRUE	TRUE	Eif4ebp1.8	IR signalling	Eif4ebp1	Y	33	Q60876
Cav2.3	TRUE	TRUE	TRUE	Cav2.3	IR signalling	Cav2	Y	19	Q9WVC3
Szt2	TRUE	TRUE	TRUE	Szt2	TOR complex	Szt2	S	3226	A2A9C3
Szt2.1	TRUE	TRUE	TRUE	Szt2.1	TOR complex	Szt2	S	3230	A2A9C3
Araf	TRUE	TRUE	TRUE	Araf	TOR complex	Araf;Raf1	S	580;621	Q99N57
Rpl23a	TRUE	TRUE	TRUE	Rpl23a	TOR complex	Rpl23a	S	43	P62751
Gsk3a1	TRUE	TRUE	TRUE	Gsk3a	TOR complex	Gsk3a;Gsk3b	S	278;215	Q2NL51
Otud5	TRUE	TRUE	TRUE	Otud5	TOR complex	Otud5	S	64	Q3U2S4
Smcr8	TRUE	TRUE	TRUE	Smcr8	TOR complex	Smcr8	S	486	Q3UMB5
Smcr8.1	TRUE	TRUE	TRUE	Smcr8.1	TOR complex	Smcr8	S	488	Q3UMB5
Smcr8.2	TRUE	TRUE	TRUE	Smcr8.2	TOR complex	Smcr8	S	416	Q3UMB5
Prkaa11	FALSE	TRUE	TRUE	Prkaa1	TOR complex	Prkaa1	S	356	Q5EG47
Prkaa1.11	FALSE	FALSE	TRUE	Prkaa1.1	TOR complex	Prkaa1	S	486	Q5EG47
Ccdc88a	TRUE	TRUE	TRUE	Ccdc88a	TOR complex	Ccdc88a	S	1677	Q5SNZ0
Ccdc88a.1	TRUE	TRUE	TRUE	Ccdc88a.1	TOR complex	Ccdc88a	S	1680	Q5SNZ0
Ccdc88a.2	TRUE	FALSE	TRUE	Ccdc88a.2	TOR complex	Ccdc88a	S	1417	Q5SNZ0
Ccdc88a.3	FALSE	TRUE	FALSE	Ccdc88a.3	TOR complex	Ccdc88a	S	1719	Q5SNZ0
Eif4ebp11	TRUE	TRUE	TRUE	Eif4ebp1	TOR complex	Eif4ebp1	S	64	Q60876
Eif4ebp1.11	TRUE	TRUE	TRUE	Eif4ebp1.1	TOR complex	Eif4ebp1	S	2	Q60876
Eif4ebp1.21	FALSE	FALSE	TRUE	Eif4ebp1.2	TOR complex	Eif4ebp1	S	5	Q60876
Tsc21	FALSE	FALSE	TRUE	Tsc2	TOR complex	Tsc2	S	1805	Q61037
Tsc2.11	TRUE	TRUE	TRUE	Tsc2.1	TOR complex	Tsc2	S	1806	Q61037
Tsc2.21	TRUE	TRUE	TRUE	Tsc2.2	TOR complex	Tsc2	S	981	Q61037
Tsc2.31	TRUE	TRUE	FALSE	Tsc2.3	TOR complex	Tsc2	S	1419	Q61037
Tsc2.41	TRUE	TRUE	TRUE	Tsc2.4	TOR complex	Tsc2	S	1421	Q61037
Fnip1	TRUE	FALSE	TRUE	Fnip1	TOR complex	Fnip1	S	945	Q68FD7
Sik3	TRUE	TRUE	TRUE	Sik3	TOR complex	Sik3	S	534	Q6P4S6
Sik3.1	TRUE	FALSE	TRUE	Sik3.1	TOR complex	Sik3	S	721	Q6P4S6
Sik3.2	TRUE	TRUE	TRUE	Sik3.2	TOR complex	Sik3	S	493	Q6P4S6
Dgkq	TRUE	TRUE	TRUE	Dgkq	TOR complex	Dgkq	S	22	Q6P5E8
Rictor	TRUE	TRUE	TRUE	Rictor	TOR complex	Rictor	S	1387	Q6QI06
Rictor.1	TRUE	TRUE	TRUE	Rictor.1	TOR complex	Rictor	S	21	Q6QI06
Larp1	TRUE	TRUE	TRUE	Larp1	TOR complex	Larp1	S	81	Q6ZQ58
Larp1.1	TRUE	TRUE	TRUE	Larp1.1	TOR complex	Larp1	S	494	Q6ZQ58
Larp1.2	FALSE	TRUE	FALSE	Larp1.2	TOR complex	Larp1	S	498	Q6ZQ58
Larp1.3	TRUE	TRUE	TRUE	Larp1.3	TOR complex	Larp1	S	525	Q6ZQ58
Larp1.4	TRUE	TRUE	FALSE	Larp1.4	TOR complex	Larp1	S	531	Q6ZQ58
Larp1.5	TRUE	TRUE	FALSE	Larp1.5	TOR complex	Larp1	S	533	Q6ZQ58
Larp1.6	TRUE	FALSE	FALSE	Larp1.6	TOR complex	Larp1	S	800	Q6ZQ58
Larp1.7	TRUE	TRUE	TRUE	Larp1.7	TOR complex	Larp1	S	801	Q6ZQ58
Larp1.8	TRUE	TRUE	TRUE	Larp1.8	TOR complex	Larp1	S	138	Q6ZQ58
Larp1.9	TRUE	TRUE	TRUE	Larp1.9	TOR complex	Larp1	S	608	Q6ZQ58
Larp1.10	TRUE	TRUE	TRUE	Larp1.10	TOR complex	Larp1	S	743	Q6ZQ58
Larp1.11	TRUE	TRUE	TRUE	Larp1.11	TOR complex	Larp1	S	751	Q6ZQ58
Larp1.12	TRUE	FALSE	FALSE	Larp1.12	TOR complex	Larp1	S	299	Q6ZQ58
Larp1.13	TRUE	TRUE	TRUE	Larp1.13	TOR complex	Larp1	S	302	Q6ZQ58
Prr5	TRUE	TRUE	FALSE	Prr5	TOR complex	Prr5	S	11	Q812A5
Mapkap1	TRUE	FALSE	TRUE	Mapkap1	TOR complex	Mapkap1	S	510	Q8BKH7
Rps6kb11	TRUE	TRUE	TRUE	Rps6kb1	TOR complex	Rps6kb1	S	447	Q8BSK8
Wdr59	TRUE	FALSE	FALSE	Wdr59	TOR complex	Wdr59	S	840	Q8C0M0
Rptor	TRUE	FALSE	FALSE	Rptor	TOR complex	Rptor	S	877	Q8K4Q0
Rptor.1	TRUE	TRUE	TRUE	Rptor.1	TOR complex	Rptor	S	863	Q8K4Q0
Rptor.2	TRUE	TRUE	TRUE	Rptor.2	TOR complex	Rptor	S	722	Q8K4Q0
Flcn	TRUE	TRUE	TRUE	Flcn	TOR complex	Flcn	S	62	Q8QZS3
Mios	TRUE	TRUE	TRUE	Mios	TOR complex	Mios	S	766	Q8VE19
Sh3bp4	TRUE	TRUE	TRUE	Sh3bp4	TOR complex	Sh3bp4	S	295	Q921I6
Sh3bp4.1	TRUE	TRUE	TRUE	Sh3bp4.1	TOR complex	Sh3bp4	S	245	Q921I6
Sirt11	TRUE	TRUE	TRUE	Sirt1	TOR complex	Sirt1	S	14	Q923E4
Sirt1.11	TRUE	TRUE	TRUE	Sirt1.1	TOR complex	Sirt1	S	16	Q923E4
Wac	TRUE	FALSE	TRUE	Wac	TOR complex	Wac	S	445	Q924H7
Wac.1	FALSE	TRUE	TRUE	Wac.1	TOR complex	Wac	S	446	Q924H7
Klhl22	TRUE	TRUE	TRUE	Klhl22	TOR complex	Klhl22	S	596	Q99JN2
Rragc	TRUE	TRUE	TRUE	Rragc	TOR complex	Rragc	S	94	Q99K70
Rragc.1	TRUE	TRUE	TRUE	Rragc.1	TOR complex	Rragc	S	15	Q99K70
Lamtor1	FALSE	TRUE	FALSE	Lamtor1	TOR complex	Lamtor1	S	55	Q9CQ22
Lamtor1.1	FALSE	TRUE	FALSE	Lamtor1.1	TOR complex	Lamtor1	S	56	Q9CQ22
Pih1d1	FALSE	FALSE	TRUE	Pih1d1	TOR complex	Pih1d1	S	4	Q9CQJ2
Pih1d1.1	TRUE	TRUE	TRUE	Pih1d1.1	TOR complex	Pih1d1	S	12	Q9CQJ2
Golph3	TRUE	TRUE	TRUE	Golph3	TOR complex	Golph3	S	35	Q9CRA5
Akt1s1	TRUE	TRUE	TRUE	Akt1s1	TOR complex	Akt1s1	S	184	Q9D1F4
Akt1s1.1	FALSE	FALSE	TRUE	Akt1s1.1	TOR complex	Akt1s1	S	212	Q9D1F4
Akt1s1.2	TRUE	TRUE	TRUE	Akt1s1.2	TOR complex	Akt1s1	S	213	Q9D1F4
Tsc1	TRUE	TRUE	TRUE	Tsc1	TOR complex	Tsc1	S	592	Q9EP53
Stk11	TRUE	TRUE	TRUE	Stk11	TOR complex	Stk11	S	31	Q9WTK7
Rps6kb2	FALSE	TRUE	TRUE	Rps6kb2	TOR complex	Rps6kb2	S	15	Q9Z1M4
Szt2.2	TRUE	TRUE	TRUE	Szt2.2	TOR complex	Szt2	T	2433	A2A9C3
Rpl23a.1	FALSE	TRUE	TRUE	Rpl23a.1	TOR complex	Rpl23a	T	42	P62751
Prkaa1.21	FALSE	TRUE	FALSE	Prkaa1.2	TOR complex	Prkaa1	T	355	Q5EG47
Prkaa1.31	TRUE	TRUE	TRUE	Prkaa1.3	TOR complex	Prkaa1;Prkaa2	T	183;172	Q5EG47
Eif4ebp1.31	TRUE	TRUE	TRUE	Eif4ebp1.3	TOR complex	Eif4ebp1	T	69	Q60876
Eif4ebp1.41	TRUE	TRUE	TRUE	Eif4ebp1.4	TOR complex	Eif4ebp1	T	45	Q60876
Sik3.3	FALSE	TRUE	TRUE	Sik3.3	TOR complex	Sik3	T	163	Q6P4S6
Sik3.4	TRUE	TRUE	TRUE	Sik3.4	TOR complex	Sik3	T	411	Q6P4S6
Larp1.14	TRUE	TRUE	TRUE	Larp1.14	TOR complex	Larp1	T	503	Q6ZQ58
Larp1.15	FALSE	FALSE	TRUE	Larp1.15	TOR complex	Larp1	T	492	Q6ZQ58
Larp1.16	TRUE	TRUE	TRUE	Larp1.16	TOR complex	Larp1	T	626	Q6ZQ58
Rps6kb1.11	FALSE	FALSE	TRUE	Rps6kb1.1	TOR complex	Rps6kb1	T	444	Q8BSK8
Klhl22.1	TRUE	TRUE	TRUE	Klhl22.1	TOR complex	Klhl22	T	605	Q99JN2
Rragc.2	TRUE	TRUE	TRUE	Rragc.2	TOR complex	Rragc	T	95	Q99K70
Lamtor1.2	TRUE	TRUE	TRUE	Lamtor1.2	TOR complex	Lamtor1	T	28	Q9CQ22
Akt1s1.3	TRUE	TRUE	TRUE	Akt1s1.3	TOR complex	Akt1s1	T	247	Q9D1F4
Syap1	TRUE	TRUE	TRUE	Syap1	TOR complex	Syap1	T	262	Q9D5V6
Rps6kb2.1	TRUE	TRUE	TRUE	Rps6kb2.1	TOR complex	Rps6kb2	T	11	Q9Z1M4
Araf.1	TRUE	TRUE	TRUE	Araf.1	TOR complex	Araf	Y	155	P04627
Gsk3a.11	TRUE	TRUE	TRUE	Gsk3a.1	TOR complex	Gsk3a;Gsk3b	Y	279;216	Q2NL51
Rps6	TRUE	TRUE	TRUE	Rps6	TOR complex	Rps6	S	235	P62754
Rps6.1	TRUE	TRUE	FALSE	Rps6.1	TOR complex	Rps6	S	236	P62754
Rps6.2	TRUE	TRUE	FALSE	Rps6.2	TOR complex	Rps6	S	240	P62754
Rps6.3	FALSE	TRUE	FALSE	Rps6.3	TOR complex	Rps6	S	244	P62754
Dgkq.1	TRUE	TRUE	TRUE	Dgkq.1	TOR complex	Dgkq	S	22	Q6P5E8
Dgkq.2	TRUE	TRUE	TRUE	Dgkq.2	TOR complex	Dgkq	S	26	Q6P5E8
Rictor.2	TRUE	TRUE	TRUE	Rictor.2	TOR complex	Rictor	S	1384	Q6QI06
Rictor.3	TRUE	TRUE	TRUE	Rictor.3	TOR complex	Rictor	S	1387	Q6QI06
Rictor.4	TRUE	TRUE	TRUE	Rictor.4	TOR complex	Rictor	S	1176	Q6QI06
Larp1.17	TRUE	TRUE	TRUE	Larp1.17	TOR complex	Larp1	S	525	Q6ZQ58
Larp1.18	TRUE	TRUE	TRUE	Larp1.18	TOR complex	Larp1	S	531	Q6ZQ58
Larp1.19	TRUE	TRUE	TRUE	Larp1.19	TOR complex	Larp1	S	604	Q6ZQ58
Larp1.20	TRUE	TRUE	TRUE	Larp1.20	TOR complex	Larp1	S	608	Q6ZQ58
Larp1.21	TRUE	TRUE	TRUE	Larp1.21	TOR complex	Larp1	S	743	Q6ZQ58
Larp1.22	TRUE	TRUE	TRUE	Larp1.22	TOR complex	Larp1	S	751	Q6ZQ58
Larp1.23	TRUE	FALSE	FALSE	Larp1.23	TOR complex	Larp1	S	299	Q6ZQ58
Larp1.24	TRUE	TRUE	TRUE	Larp1.24	TOR complex	Larp1	S	302	Q6ZQ58
Rptor.3	TRUE	TRUE	TRUE	Rptor.3	TOR complex	Rptor	S	859	Q8K4Q0
Rptor.4	TRUE	TRUE	TRUE	Rptor.4	TOR complex	Rptor	S	863	Q8K4Q0
Rragc.3	FALSE	TRUE	TRUE	Rragc.3	TOR complex	Rragc	S	2	Q99K70
Rragc.4	FALSE	TRUE	TRUE	Rragc.4	TOR complex	Rragc	S	15	Q99K70
Eif4ebp21	FALSE	FALSE	TRUE	Eif4ebp2	TOR complex	Eif4ebp2	T	37	P70445
Eif4ebp2.11	TRUE	TRUE	TRUE	Eif4ebp2.1	TOR complex	Eif4ebp2	T	46	P70445
Eif4ebp1.51	FALSE	TRUE	FALSE	Eif4ebp1.5	TOR complex	Eif4ebp1	T	35	Q60876
Eif4ebp1.61	TRUE	TRUE	TRUE	Eif4ebp1.6	TOR complex	Eif4ebp1	T	36	Q60876
Eif4ebp1.71	TRUE	TRUE	TRUE	Eif4ebp1.7	TOR complex	Eif4ebp1	T	45	Q60876
Rictor.5	TRUE	TRUE	TRUE	Rictor.5	TOR complex	Rictor	T	1174	Q6QI06
Rptor.5	TRUE	TRUE	FALSE	Rptor.5	TOR complex	Rptor	T	857	Q8K4Q0
Eif4ebp2.21	TRUE	TRUE	FALSE	Eif4ebp2.2	TOR complex	Eif4ebp2	Y	34	P70445
Eif4ebp1.81	TRUE	TRUE	TRUE	Eif4ebp1.8	TOR complex	Eif4ebp1	Y	33	Q60876
Arid1a	TRUE	TRUE	TRUE	Arid1a	Muscle	Arid1a	S	697	A2BH40
Arid1a.1	TRUE	FALSE	TRUE	Arid1a.1	Muscle	Arid1a	S	770	A2BH40
Arid1a.2	TRUE	TRUE	FALSE	Arid1a.2	Muscle	Arid1a	S	773	A2BH40
Arid1a.3	TRUE	TRUE	TRUE	Arid1a.3	Muscle	Arid1a	S	365	A2BH40
Ep300	TRUE	TRUE	TRUE	Ep300	Muscle	Ep300	S	12	B2RWS6
Ep300.1	TRUE	FALSE	TRUE	Ep300.1	Muscle	Ep300	S	1715	B2RWS6
Dock5	TRUE	TRUE	TRUE	Dock5	Muscle	Dock5	S	1656	B2RY04
Dock5.1	TRUE	TRUE	TRUE	Dock5.1	Muscle	Dock5	S	1788	B2RY04
Dock5.2	TRUE	TRUE	TRUE	Dock5.2	Muscle	Dock5	S	1832	B2RY04
Dock5.3	TRUE	TRUE	TRUE	Dock5.3	Muscle	Dock5	S	1765	B2RY04
Dock5.4	FALSE	TRUE	FALSE	Dock5.4	Muscle	Dock5	S	1804	B2RY04
Zbed6	TRUE	TRUE	TRUE	Zbed6	Muscle	Zbed6	S	381	D2EAC2
Zbed6.1	TRUE	TRUE	TRUE	Zbed6.1	Muscle	Zbed6	S	383	D2EAC2
Piezo1	TRUE	TRUE	TRUE	Piezo1	Muscle	Piezo1	S	1864	E2JF22
Piezo1.1	TRUE	TRUE	TRUE	Piezo1.1	Muscle	Piezo1	S	1385	E2JF22
Piezo1.2	TRUE	TRUE	TRUE	Piezo1.2	Muscle	Piezo1	S	1646	E2JF22
Chd2	TRUE	TRUE	TRUE	Chd2	Muscle	Chd2	S	1365	E9PZM4
Akap13	FALSE	FALSE	TRUE	Akap13	Muscle	Akap13	S	1890	E9Q394
Akap13.1	TRUE	TRUE	TRUE	Akap13.1	Muscle	Akap13	S	1892	E9Q394
Akap13.2	TRUE	TRUE	TRUE	Akap13.2	Muscle	Akap13	S	2663	E9Q394
Akap13.3	TRUE	TRUE	TRUE	Akap13.3	Muscle	Akap13	S	1613	E9Q394
Akap13.4	FALSE	TRUE	TRUE	Akap13.4	Muscle	Akap13	S	2308	E9Q394
Akap13.5	TRUE	TRUE	TRUE	Akap13.5	Muscle	Akap13	S	1839	E9Q394
Akap13.6	FALSE	FALSE	TRUE	Akap13.6	Muscle	Akap13	S	2682	E9Q394
Akap13.7	TRUE	TRUE	TRUE	Akap13.7	Muscle	Akap13	S	2692	E9Q394
Akap13.8	TRUE	FALSE	FALSE	Akap13.8	Muscle	Akap13	S	1253	E9Q394
Arid2	TRUE	TRUE	FALSE	Arid2	Muscle	Arid2	S	631	E9Q7E2
Atp2b1	TRUE	TRUE	TRUE	Atp2b1	Muscle	Atp2b1	S	1155	G5E829
Atp2b1.1	TRUE	TRUE	TRUE	Atp2b1.1	Muscle	Atp2b1	S	17	G5E829
Atp2b1.2	TRUE	FALSE	TRUE	Atp2b1.2	Muscle	Atp2b1	S	1139	G5E829
Atp2b1.3	TRUE	FALSE	TRUE	Atp2b1.3	Muscle	Atp2b1	S	1140	G5E829
S1pr1	TRUE	FALSE	TRUE	S1pr1	Muscle	S1pr1	S	351	O08530
Bin1	TRUE	TRUE	TRUE	Bin1	Muscle	Bin1	S	296	O08539
Bin1.1	TRUE	TRUE	TRUE	Bin1.1	Muscle	Bin1	S	298	O08539
Bin1.2	TRUE	TRUE	TRUE	Bin1.2	Muscle	Bin1	S	304	O08539
Bin1.3	TRUE	TRUE	TRUE	Bin1.3	Muscle	Bin1	S	321	O08539
Bin1.4	TRUE	TRUE	TRUE	Bin1.4	Muscle	Bin1	S	324	O08539
Bin1.5	TRUE	TRUE	TRUE	Bin1.5	Muscle	Bin1	S	332	O08539
Emd	TRUE	TRUE	TRUE	Emd	Muscle	Emd	S	141	O08579
Akap1	FALSE	FALSE	TRUE	Akap1	Muscle	Akap1	S	428	O08715
Akap1.1	TRUE	TRUE	TRUE	Akap1.1	Muscle	Akap1	S	55	O08715
Akap1.2	TRUE	TRUE	TRUE	Akap1.2	Muscle	Akap1	S	101	O08715
Akap1.3	TRUE	TRUE	TRUE	Akap1.3	Muscle	Akap1	S	103	O08715
Akap1.4	FALSE	TRUE	TRUE	Akap1.4	Muscle	Akap1	S	104	O08715
Casp12	TRUE	TRUE	TRUE	Casp12	Muscle	Casp12	S	104	O08736
Casp12.1	TRUE	TRUE	TRUE	Casp12.1	Muscle	Casp12	S	85	O08736
Casp12.2	TRUE	TRUE	TRUE	Casp12.2	Muscle	Casp12	S	89	O08736
Map2k6	TRUE	TRUE	TRUE	Map2k6	Muscle	Map2k6;Map2k3	S	207;218	P70236
Map3k5	TRUE	FALSE	TRUE	Map3k5	Muscle	Map3k5	S	1040	O35099
Cx3cl1	FALSE	TRUE	FALSE	Cx3cl1	Muscle	Cx3cl1	S	259	O35188
Cx3cl1.1	TRUE	TRUE	TRUE	Cx3cl1.1	Muscle	Cx3cl1	S	262	O35188
Pkd2	TRUE	FALSE	FALSE	Pkd2	Muscle	Pkd2	S	70	O35245
Pkd2.1	FALSE	TRUE	TRUE	Pkd2.1	Muscle	Pkd2	S	72	O35245
Pkd2.2	FALSE	TRUE	TRUE	Pkd2.2	Muscle	Pkd2	S	946	O35245
Pkd2.3	TRUE	TRUE	TRUE	Pkd2.3	Muscle	Pkd2	S	827	O35245
E2f3	TRUE	TRUE	TRUE	E2f3	Muscle	E2f3	S	158	O35261
Bnip2	TRUE	TRUE	TRUE	Bnip2	Muscle	Bnip2	S	114	O54940
Bnip3	FALSE	TRUE	FALSE	Bnip3	Muscle	Bnip3	S	85	O55003
Bnip3.1	TRUE	TRUE	TRUE	Bnip3.1	Muscle	Bnip3	S	88	O55003
Acot1	TRUE	TRUE	TRUE	Acot1	Muscle	Acot1;Acot3;Acot6;Acot4;Acot5	S	56;67;56;56;56	O55137
Acot1.1	TRUE	TRUE	TRUE	Acot1.1	Muscle	Acot1	S	416	O55137
Atp2a2	TRUE	FALSE	FALSE	Atp2a2	Muscle	Atp2a2	S	661	O55143
Atp2a2.1	TRUE	TRUE	TRUE	Atp2a2.1	Muscle	Atp2a2	S	663	O55143
Grem1	TRUE	TRUE	TRUE	Grem1	Muscle	Grem1	S	76	O70326
Grem1.1	TRUE	TRUE	TRUE	Grem1.1	Muscle	Grem1	S	77	O70326
Lrp6	TRUE	TRUE	FALSE	Lrp6	Muscle	Lrp6	S	1490	O88572
Comt	TRUE	TRUE	TRUE	Comt	Muscle	Comt	S	261	O88587
Pak11	TRUE	TRUE	TRUE	Pak1	Muscle	Pak1	S	115	O88643
Pak1.11	TRUE	TRUE	TRUE	Pak1.1	Muscle	Pak1	S	204	O88643
Pak1.21	TRUE	TRUE	TRUE	Pak1.2	Muscle	Pak1	S	144	O88643
Zfand5	TRUE	TRUE	TRUE	Zfand5	Muscle	Zfand5	S	48	O88878
Actn3	TRUE	TRUE	TRUE	Actn3	Muscle	Actn3;Actn4;Actn2;Actn1	S	153;160;147;140	P57780
Casp8	TRUE	TRUE	TRUE	Casp8	Muscle	Casp8	S	188	O89110
Aldoa	TRUE	TRUE	TRUE	Aldoa	Muscle	Aldoa	S	36	P05064
Aldoa.1	TRUE	TRUE	TRUE	Aldoa.1	Muscle	Aldoa	S	39	P05064
Aldoa.2	TRUE	TRUE	TRUE	Aldoa.2	Muscle	Aldoa	S	46	P05064
Src1	FALSE	TRUE	FALSE	Src	Muscle	Src	S	74	P05480
Src.11	TRUE	TRUE	TRUE	Src.1	Muscle	Src	S	17	P05480
Src.21	FALSE	TRUE	TRUE	Src.2	Muscle	Src	S	21	P05480
Pdgfrb	TRUE	TRUE	TRUE	Pdgfrb	Muscle	Pdgfrb	S	996	P05622
Jun	TRUE	TRUE	TRUE	Jun	Muscle	Jun;Jund	S	73;100	P15066
Jun.1	TRUE	TRUE	TRUE	Jun.1	Muscle	Jun	S	246	P05627
Jun.2	TRUE	TRUE	TRUE	Jun.2	Muscle	Jun	S	63	P05627
Nr3c1	TRUE	TRUE	TRUE	Nr3c1	Muscle	Nr3c1	S	515	P06537
Nr3c1.1	TRUE	TRUE	TRUE	Nr3c1.1	Muscle	Nr3c1	S	275	P06537
Nr3c1.2	TRUE	TRUE	TRUE	Nr3c1.2	Muscle	Nr3c1	S	212	P06537
Calm1	TRUE	TRUE	TRUE	Calm1	Muscle	Calm1	S	102;102;102	P0DP28
Anxa1	TRUE	TRUE	TRUE	Anxa1	Muscle	Anxa1	S	34	P10107
Anxa1.1	TRUE	TRUE	TRUE	Anxa1.1	Muscle	Anxa1	S	37	P10107
Ncam1	TRUE	TRUE	TRUE	Ncam1	Muscle	Ncam1	S	770	P13595
Ncam1.1	TRUE	TRUE	TRUE	Ncam1.1	Muscle	Ncam1	S	774	P13595
Ncam1.2	TRUE	TRUE	TRUE	Ncam1.2	Muscle	Ncam1	S	886	P13595
Ncam1.3	TRUE	TRUE	TRUE	Ncam1.3	Muscle	Ncam1	S	887	P13595
Ncam1.4	FALSE	TRUE	TRUE	Ncam1.4	Muscle	Ncam1	S	1005	P13595
Dnmt1	TRUE	FALSE	TRUE	Dnmt1	Muscle	Dnmt1	S	122	P13864
Dnmt1.1	TRUE	FALSE	TRUE	Dnmt1.1	Muscle	Dnmt1	S	125	P13864
Dnmt1.2	TRUE	TRUE	TRUE	Dnmt1.2	Muscle	Dnmt1	S	140	P13864
Hmox1	TRUE	TRUE	TRUE	Hmox1	Muscle	Hmox1	S	242	P14901
Lgals1	TRUE	TRUE	TRUE	Lgals1	Muscle	Lgals1	S	8	P16045
Lgals1.1	TRUE	TRUE	TRUE	Lgals1.1	Muscle	Lgals1	S	30	P16045
Atf2	TRUE	TRUE	TRUE	Atf2	Muscle	Atf2	S	94	P16951
Eno1	TRUE	TRUE	TRUE	Eno1	Muscle	Eno1;Eno2;Eno3	S	40;40;40	P17182
Eno1.1	TRUE	TRUE	TRUE	Eno1.1	Muscle	Eno1;Eno2;Eno3	S	373;373;373	P17182
Serpine1	TRUE	TRUE	TRUE	Serpine1	Muscle	Serpine1	S	257	P22777
Mdm2	TRUE	TRUE	TRUE	Mdm2	Muscle	Mdm2	S	161	P23804
Mdm2.1	TRUE	TRUE	TRUE	Mdm2.1	Muscle	Mdm2	S	163	P23804
Mdm2.2	TRUE	TRUE	TRUE	Mdm2.2	Muscle	Mdm2	S	183	P23804
Mdm2.3	TRUE	TRUE	TRUE	Mdm2.3	Muscle	Mdm2	S	185	P23804
Zfp36l1	TRUE	TRUE	TRUE	Zfp36l1	Muscle	Zfp36l1	S	54	P23950
Zfp36l1.1	TRUE	TRUE	TRUE	Zfp36l1.1	Muscle	Zfp36l1	S	92	P23950
Nfkb1	TRUE	TRUE	TRUE	Nfkb1	Muscle	Nfkb1	S	940	P25799
Pdgfra	TRUE	TRUE	TRUE	Pdgfra	Muscle	Pdgfra	S	1013	P26618
Pdgfra.1	TRUE	TRUE	TRUE	Pdgfra.1	Muscle	Pdgfra	S	1016	P26618
Pdgfra.2	TRUE	TRUE	TRUE	Pdgfra.2	Muscle	Pdgfra	S	767	P26618
Fkbp1a	TRUE	FALSE	TRUE	Fkbp1a	Muscle	Fkbp1a	S	9	P26883
Apex1	TRUE	TRUE	TRUE	Apex1	Muscle	Apex1	S	18	P28352
Rxra	TRUE	TRUE	TRUE	Rxra	Muscle	Rxra	S	22	P28700
Ahr	TRUE	FALSE	FALSE	Ahr	Muscle	Ahr	S	468	P30561
Map2k1	FALSE	FALSE	TRUE	Map2k1	Muscle	Map2k1;Map2k2	S	212;216	P31938
Map2k1.1	TRUE	TRUE	TRUE	Map2k1.1	Muscle	Map2k1;Map2k2	S	222;226	P31938
Ptk2	TRUE	TRUE	TRUE	Ptk2	Muscle	Ptk2	S	910	P34152
Ptk2.1	TRUE	TRUE	TRUE	Ptk2.1	Muscle	Ptk2	S	722	P34152
Hsf1	TRUE	FALSE	TRUE	Hsf1	Muscle	Hsf1	S	303	P38532
Hsf1.1	TRUE	TRUE	TRUE	Hsf1.1	Muscle	Hsf1	S	314	P38532
Hsf1.2	FALSE	TRUE	TRUE	Hsf1.2	Muscle	Hsf1	S	326	P38532
Cdkn1a	TRUE	FALSE	FALSE	Cdkn1a	Muscle	Cdkn1a	S	78	P39689
Foxk1	TRUE	TRUE	TRUE	Foxk1	Muscle	Foxk1	S	199	P42128
Foxk1.1	TRUE	TRUE	TRUE	Foxk1.1	Muscle	Foxk1	S	431	P42128
Foxk1.2	TRUE	TRUE	TRUE	Foxk1.2	Muscle	Foxk1	S	406	P42128
Stat3	TRUE	TRUE	TRUE	Stat3	Muscle	Stat3	S	727	P42227
Cfl2	TRUE	TRUE	TRUE	Cfl2	Muscle	Cfl2	S	3	P45591
Cdkn1b	TRUE	TRUE	TRUE	Cdkn1b	Muscle	Cdkn1b	S	10	P46414
Yap1	TRUE	TRUE	TRUE	Yap1	Muscle	Yap1	S	112	P46938
Yap1.1	TRUE	TRUE	TRUE	Yap1.1	Muscle	Yap1	S	113	P46938
Yap1.2	TRUE	TRUE	FALSE	Yap1.2	Muscle	Yap1	S	382	P46938
Yap1.3	TRUE	FALSE	FALSE	Yap1.3	Muscle	Yap1	S	385	P46938
Yap1.4	FALSE	FALSE	TRUE	Yap1.4	Muscle	Yap1	S	393	P46938
Yap1.5	TRUE	TRUE	TRUE	Yap1.5	Muscle	Yap1	S	46	P46938
Yap1.6	FALSE	TRUE	FALSE	Yap1.6	Muscle	Yap1	S	261	P46938
Yap1.7	TRUE	TRUE	TRUE	Yap1.7	Muscle	Yap1	S	20	P46938
Yap1.8	TRUE	FALSE	FALSE	Yap1.8	Muscle	Yap1	S	22	P46938
Yap1.9	TRUE	TRUE	TRUE	Yap1.9	Muscle	Yap1	S	94	P46938
Yap1.10	TRUE	TRUE	TRUE	Yap1.10	Muscle	Yap1	S	274	P46938
Yap1.11	TRUE	TRUE	TRUE	Yap1.11	Muscle	Yap1	S	148	P46938
Yap1.12	TRUE	TRUE	TRUE	Yap1.12	Muscle	Yap1	S	149	P46938
Yap1.13	TRUE	TRUE	TRUE	Yap1.13	Muscle	Yap1	S	351	P46938
Yap1.14	TRUE	TRUE	TRUE	Yap1.14	Muscle	Yap1	S	352	P46938
Capzb	TRUE	TRUE	TRUE	Capzb	Muscle	Capzb	S	263	P47757
Map2k4	TRUE	TRUE	TRUE	Map2k4	Muscle	Map2k4	S	255	P47809
Map2k4.1	TRUE	TRUE	TRUE	Map2k4.1	Muscle	Map2k4	S	78	P47809
Mapk14	TRUE	TRUE	TRUE	Mapk14	Muscle	Mapk14	S	2	P47811
Crkl	TRUE	TRUE	TRUE	Crkl	Muscle	Crkl	S	107	P47941
Lmna	TRUE	TRUE	TRUE	Lmna	Muscle	Lmna	S	611	P48678
Lmna.1	TRUE	TRUE	TRUE	Lmna.1	Muscle	Lmna	S	613	P48678
Lmna.2	TRUE	TRUE	TRUE	Lmna.2	Muscle	Lmna	S	614	P48678
Lmna.3	TRUE	TRUE	TRUE	Lmna.3	Muscle	Lmna	S	616	P48678
Lmna.4	TRUE	TRUE	TRUE	Lmna.4	Muscle	Lmna	S	620	P48678
Lmna.5	TRUE	TRUE	TRUE	Lmna.5	Muscle	Lmna	S	404	P48678
Lmna.6	TRUE	TRUE	TRUE	Lmna.6	Muscle	Lmna	S	570	P48678
Lmna.7	TRUE	TRUE	TRUE	Lmna.7	Muscle	Lmna	S	573	P48678
Lmna.8	TRUE	TRUE	FALSE	Lmna.8	Muscle	Lmna	S	575	P48678
Lmna.9	TRUE	TRUE	TRUE	Lmna.9	Muscle	Lmna	S	301	P48678
Lmna.10	TRUE	TRUE	TRUE	Lmna.10	Muscle	Lmna	S	66	P48678
Lmna.11	TRUE	TRUE	TRUE	Lmna.11	Muscle	Lmna	S	277	P48678
Lmna.12	FALSE	TRUE	FALSE	Lmna.12	Muscle	Lmna	S	107	P48678
Lmna.13	TRUE	TRUE	TRUE	Lmna.13	Muscle	Lmna	S	390	P48678
Lmna.14	TRUE	TRUE	TRUE	Lmna.14	Muscle	Lmna	S	392	P48678
Lmna.15	FALSE	TRUE	TRUE	Lmna.15	Muscle	Lmna	S	212	P48678
Lmna.16	TRUE	TRUE	TRUE	Lmna.16	Muscle	Lmna	S	458	P48678
Lmna.17	TRUE	TRUE	TRUE	Lmna.17	Muscle	Lmna	S	463	P48678
Lmna.18	TRUE	TRUE	TRUE	Lmna.18	Muscle	Lmna	S	12	P48678
Lmna.19	TRUE	TRUE	TRUE	Lmna.19	Muscle	Lmna	S	22	P48678
Lmna.20	TRUE	TRUE	TRUE	Lmna.20	Muscle	Lmna	S	546	P48678
Lmna.21	TRUE	TRUE	TRUE	Lmna.21	Muscle	Lmna	S	629	P48678
Lmna.22	TRUE	TRUE	TRUE	Lmna.22	Muscle	Lmna	S	633	P48678
Lmna.23	TRUE	FALSE	TRUE	Lmna.23	Muscle	Lmna	S	637	P48678
Lmna.24	TRUE	TRUE	TRUE	Lmna.24	Muscle	Lmna	S	652	P48678
Lmna.25	TRUE	TRUE	TRUE	Lmna.25	Muscle	Lmna	S	653	P48678
Lmna.26	TRUE	TRUE	TRUE	Lmna.26	Muscle	Lmna	S	533	P48678
Lmna.27	TRUE	TRUE	TRUE	Lmna.27	Muscle	Lmna	S	51	P48678
Cav1	TRUE	TRUE	TRUE	Cav1	Muscle	Cav1	S	2	P49817
Cav1.1	TRUE	TRUE	TRUE	Cav1.1	Muscle	Cav1	S	9	P49817
Pkm	TRUE	TRUE	TRUE	Pkm	Muscle	Pkm	S	100	P52480
Pkm.1	TRUE	TRUE	TRUE	Pkm.1	Muscle	Pkm	S	37	P52480
Tpm1	TRUE	TRUE	TRUE	Tpm1	Muscle	Tpm1	S	174	P58771
Lpar1	FALSE	TRUE	TRUE	Lpar1	Muscle	Lpar1	S	346	P61793
Ybx11	TRUE	TRUE	TRUE	Ybx1	Muscle	Ybx1	S	311	P62960
Ybx1.11	TRUE	TRUE	TRUE	Ybx1.1	Muscle	Ybx1	S	312	P62960
Ybx1.21	TRUE	TRUE	TRUE	Ybx1.2	Muscle	Ybx1	S	163	P62960
Ybx1.31	FALSE	TRUE	TRUE	Ybx1.3	Muscle	Ybx1	S	165	P62960
Ybx1.41	TRUE	TRUE	TRUE	Ybx1.4	Muscle	Ybx1	S	172	P62960
Ybx1.51	TRUE	TRUE	TRUE	Ybx1.5	Muscle	Ybx1;Ybx2;Ybx3	S	100;139;126	Q9JKB3
Hspa8	TRUE	FALSE	TRUE	Hspa8	Muscle	Hspa8	S	2	P63017
Sumo1	TRUE	TRUE	TRUE	Sumo1	Muscle	Sumo1	S	2	P63166
Ppp3ca	FALSE	TRUE	TRUE	Ppp3ca	Muscle	Ppp3ca	S	469	P63328
Npr3	TRUE	TRUE	TRUE	Npr3	Muscle	Npr3	S	528	P70180
Hdac2	TRUE	TRUE	TRUE	Hdac2	Muscle	Hdac2	S	422	P70288
Hdac2.1	TRUE	TRUE	TRUE	Hdac2.1	Muscle	Hdac2	S	394	P70288
Stim1	TRUE	TRUE	TRUE	Stim1	Muscle	Stim1	S	257	P70302
Stim1.1	TRUE	FALSE	FALSE	Stim1.1	Muscle	Stim1	S	519	P70302
Stim1.2	TRUE	TRUE	TRUE	Stim1.2	Muscle	Stim1	S	575	P70302
Naca	TRUE	TRUE	TRUE	Naca	Muscle	Naca	S	166;2138	Q60817
Csrp1	TRUE	TRUE	TRUE	Csrp1	Muscle	Csrp1	S	192	P97315
Tarbp2	TRUE	TRUE	FALSE	Tarbp2	Muscle	Tarbp2	S	151	P97473
Shc11	TRUE	TRUE	TRUE	Shc1	Muscle	Shc1	S	422	P98083
Shc1.11	TRUE	TRUE	TRUE	Shc1.1	Muscle	Shc1	S	139	P98083
Il6st	TRUE	TRUE	TRUE	Il6st	Muscle	Il6st	S	665	Q00560
Il6st.1	TRUE	TRUE	TRUE	Il6st.1	Muscle	Il6st	S	837	Q00560
Hmgcr	TRUE	FALSE	TRUE	Hmgcr	Muscle	Hmgcr	S	871	Q01237
Ctnnb1	TRUE	TRUE	TRUE	Ctnnb1	Muscle	Ctnnb1	S	45	Q02248
Ctnnb1.1	TRUE	TRUE	TRUE	Ctnnb1.1	Muscle	Ctnnb1	S	191	Q02248
Ctnnb1.2	TRUE	TRUE	TRUE	Ctnnb1.2	Muscle	Ctnnb1	S	675	Q02248
Ctnnb1.3	TRUE	TRUE	TRUE	Ctnnb1.3	Muscle	Ctnnb1	S	552	Q02248
Nf1	FALSE	FALSE	TRUE	Nf1	Muscle	Nf1	S	2517	Q04690
Nf1.1	TRUE	TRUE	TRUE	Nf1.1	Muscle	Nf1	S	2599	Q04690
Nf1.2	TRUE	TRUE	TRUE	Nf1.2	Muscle	Nf1	S	2545	Q04690
Tanc1	TRUE	FALSE	TRUE	Tanc1	Muscle	Tanc1	S	445	Q0VGY8
Tanc1.1	TRUE	TRUE	TRUE	Tanc1.1	Muscle	Tanc1	S	267	Q0VGY8
Gsk3a2	TRUE	TRUE	TRUE	Gsk3a	Muscle	Gsk3a;Gsk3b	S	278;215	Q2NL51
Pdlim7	TRUE	TRUE	TRUE	Pdlim7	Muscle	Pdlim7	S	111	Q3TJD7
Smarca4	TRUE	TRUE	TRUE	Smarca4	Muscle	Smarca4	S	1419	Q3TKT4
Smarca4.1	TRUE	TRUE	TRUE	Smarca4.1	Muscle	Smarca4	S	695	Q3TKT4
Smarca4.2	TRUE	FALSE	FALSE	Smarca4.2	Muscle	Smarca4	S	610	Q3TKT4
Smarca4.3	TRUE	TRUE	TRUE	Smarca4.3	Muscle	Smarca4	S	613	Q3TKT4
P2rx3	TRUE	TRUE	TRUE	P2rx3	Muscle	P2rx3	S	292	Q3UR32
Slmap	TRUE	TRUE	TRUE	Slmap	Muscle	Slmap	S	469	Q3URD3
Sorbs2	TRUE	FALSE	FALSE	Sorbs2	Muscle	Sorbs2	S	1097	Q3UTJ2
Sorbs2.1	FALSE	FALSE	TRUE	Sorbs2.1	Muscle	Sorbs2	S	1098	Q3UTJ2
Sorbs2.2	TRUE	TRUE	TRUE	Sorbs2.2	Muscle	Sorbs2	S	339	Q3UTJ2
Sorbs2.3	FALSE	TRUE	TRUE	Sorbs2.3	Muscle	Sorbs2	S	382	Q3UTJ2
Sorbs2.4	TRUE	TRUE	TRUE	Sorbs2.4	Muscle	Sorbs2	S	27	Q3UTJ2
Spag9	TRUE	TRUE	TRUE	Spag9	Muscle	Spag9	S	203	Q58A65
Prkaa12	FALSE	TRUE	TRUE	Prkaa1	Muscle	Prkaa1	S	356	Q5EG47
Prkaa1.12	FALSE	FALSE	TRUE	Prkaa1.1	Muscle	Prkaa1	S	486	Q5EG47
Ppp1r13l	TRUE	TRUE	TRUE	Ppp1r13l	Muscle	Ppp1r13l	S	485	Q5I1X5
Cttn	TRUE	TRUE	TRUE	Cttn	Muscle	Cttn	S	11	Q60598
Cttn.1	FALSE	FALSE	TRUE	Cttn.1	Muscle	Cttn	S	405	Q60598
Cttn.2	TRUE	FALSE	FALSE	Cttn.2	Muscle	Cttn	S	407	Q60598
Cttn.3	TRUE	TRUE	TRUE	Cttn.3	Muscle	Cttn	S	417	Q60598
Cttn.4	TRUE	TRUE	TRUE	Cttn.4	Muscle	Cttn	S	418	Q60598
Sik1	FALSE	TRUE	TRUE	Sik1	Muscle	Sik1	S	547	Q60670
Sik1.1	TRUE	TRUE	TRUE	Sik1.1	Muscle	Sik1	S	577	Q60670
Sik1.2	TRUE	FALSE	FALSE	Sik1.2	Muscle	Sik1	S	435	Q60670
Sik1.3	TRUE	TRUE	TRUE	Sik1.3	Muscle	Sik1	S	437	Q60670
Ski	TRUE	TRUE	TRUE	Ski	Muscle	Ski	S	429	Q60698
Grb101	TRUE	TRUE	TRUE	Grb10	Muscle	Grb10	S	503	Q60760
Grb10.11	FALSE	FALSE	TRUE	Grb10.1	Muscle	Grb10	S	453	Q60760
Grb10.21	TRUE	FALSE	TRUE	Grb10.2	Muscle	Grb10	S	455	Q60760
Grb10.31	TRUE	TRUE	TRUE	Grb10.3	Muscle	Grb10	S	96	Q60760
Mef2a	TRUE	TRUE	TRUE	Mef2a	Muscle	Mef2a	S	406	Q60929
Meis1	FALSE	FALSE	TRUE	Meis1	Muscle	Meis1	S	194	Q60954
Meis1.1	TRUE	TRUE	TRUE	Meis1.1	Muscle	Meis1	S	196	Q60954
Slc9a1	TRUE	TRUE	TRUE	Slc9a1	Muscle	Slc9a1	S	707	Q61165
Slc9a1.1	TRUE	TRUE	TRUE	Slc9a1.1	Muscle	Slc9a1	S	801	Q61165
Slc9a1.2	TRUE	TRUE	TRUE	Slc9a1.2	Muscle	Slc9a1	S	697	Q61165
Rgl2	TRUE	TRUE	TRUE	Rgl2	Muscle	Rgl2	S	617	Q61193
Apc1	TRUE	TRUE	TRUE	Apc	Muscle	Apc	S	778	Q61315
Apc.11	TRUE	TRUE	TRUE	Apc.1	Muscle	Apc	S	2283	Q61315
Apc.21	TRUE	FALSE	FALSE	Apc.2	Muscle	Apc	S	1036	Q61315
Apc.31	FALSE	FALSE	TRUE	Apc.3	Muscle	Apc	S	1040	Q61315
Zfhx3	TRUE	TRUE	TRUE	Zfhx3	Muscle	Zfhx3	S	2237	Q61329
Fxr1	TRUE	FALSE	FALSE	Fxr1	Muscle	Fxr1	S	641	Q61584
Fxr1.1	TRUE	TRUE	TRUE	Fxr1.1	Muscle	Fxr1	S	643	Q61584
Fxr1.2	TRUE	TRUE	TRUE	Fxr1.2	Muscle	Fxr1	S	449	Q61584
Pdcd4	TRUE	TRUE	TRUE	Pdcd4	Muscle	Pdcd4	S	76	Q61823
Pdcd4.1	TRUE	TRUE	TRUE	Pdcd4.1	Muscle	Pdcd4	S	457	Q61823
Pdcd4.2	FALSE	FALSE	TRUE	Pdcd4.2	Muscle	Pdcd4	S	94	Q61823
Foxc21	TRUE	TRUE	TRUE	Foxc2	Muscle	Foxc2	S	218	Q61850
Foxc2.11	TRUE	TRUE	TRUE	Foxc2.1	Muscle	Foxc2	S	239	Q61850
Myh10	FALSE	FALSE	TRUE	Myh10	Muscle	Myh10	S	1935	Q61879
Myh10.1	FALSE	FALSE	TRUE	Myh10.1	Muscle	Myh10	S	1952	Q61879
Myh10.2	TRUE	TRUE	TRUE	Myh10.2	Muscle	Myh10	S	1956	Q61879
Npm1	TRUE	TRUE	TRUE	Npm1	Muscle	Npm1	S	125	Q61937
Npm1.1	TRUE	TRUE	TRUE	Npm1.1	Muscle	Npm1	S	70	Q61937
Npm1.2	TRUE	FALSE	FALSE	Npm1.2	Muscle	Npm1	S	216	Q61937
Npm1.3	TRUE	TRUE	TRUE	Npm1.3	Muscle	Npm1	S	4	Q61937
Npm1.4	TRUE	TRUE	TRUE	Npm1.4	Muscle	Npm1	S	10	Q61937
Jak2	TRUE	TRUE	TRUE	Jak2	Muscle	Jak2	S	523	Q62120
Sin3b	TRUE	TRUE	TRUE	Sin3b	Muscle	Sin3b	S	115	Q62141
Ralbp1	TRUE	FALSE	TRUE	Ralbp1	Muscle	Ralbp1	S	11	Q62172
Ralbp1.1	TRUE	TRUE	TRUE	Ralbp1.1	Muscle	Ralbp1	S	29	Q62172
Ralbp1.2	FALSE	TRUE	FALSE	Ralbp1.2	Muscle	Ralbp1	S	30	Q62172
Sorbs11	TRUE	TRUE	TRUE	Sorbs1	Muscle	Sorbs1	S	185	Q62417
Sorbs1.11	TRUE	TRUE	TRUE	Sorbs1.1	Muscle	Sorbs1	S	432	Q62417
Mef2d	TRUE	TRUE	TRUE	Mef2d	Muscle	Mef2d	S	231	Q63943
Mef2d.1	TRUE	TRUE	TRUE	Mef2d.1	Muscle	Mef2d	S	180	Q63943
Mef2d.2	TRUE	TRUE	TRUE	Mef2d.2	Muscle	Mef2d	S	251	Q63943
Zeb1	TRUE	TRUE	TRUE	Zeb1	Muscle	Zeb1	S	663	Q64318
Zeb1.1	TRUE	TRUE	TRUE	Zeb1.1	Muscle	Zeb1	S	664	Q64318
Atp7a	TRUE	FALSE	TRUE	Atp7a	Muscle	Atp7a	S	1454	Q64430
Atp7a.1	TRUE	TRUE	TRUE	Atp7a.1	Muscle	Atp7a	S	356	Q64430
Atp7a.2	TRUE	FALSE	FALSE	Atp7a.2	Muscle	Atp7a	S	359	Q64430
Bcl9l	TRUE	TRUE	TRUE	Bcl9l	Muscle	Bcl9l	S	21	Q67FY2
Bcl9l.1	TRUE	TRUE	TRUE	Bcl9l.1	Muscle	Bcl9l	S	747	Q67FY2
Bcl9l.2	TRUE	TRUE	TRUE	Bcl9l.2	Muscle	Bcl9l	S	118	Q67FY2
Myof	TRUE	TRUE	TRUE	Myof	Muscle	Myof	S	340	Q69ZN7
Myof.1	TRUE	TRUE	TRUE	Myof.1	Muscle	Myof	S	174	Q69ZN7
Smarca2	TRUE	FALSE	FALSE	Smarca2	Muscle	Smarca2	S	1382	Q6DIC0
Lemd2	TRUE	TRUE	TRUE	Lemd2	Muscle	Lemd2	S	5	Q6DVA0
Lemd2.1	TRUE	TRUE	TRUE	Lemd2.1	Muscle	Lemd2	S	149	Q6DVA0
Lemd2.2	TRUE	TRUE	TRUE	Lemd2.2	Muscle	Lemd2	S	150	Q6DVA0
Lemd2.3	TRUE	TRUE	TRUE	Lemd2.3	Muscle	Lemd2	S	507	Q6DVA0
Tpm4	TRUE	TRUE	TRUE	Tpm4	Muscle	Tpm4	S	6	Q6IRU2
Hdac4	TRUE	TRUE	TRUE	Hdac4	Muscle	Hdac4	S	629	Q6NZM9
Hdac4.1	FALSE	FALSE	TRUE	Hdac4.1	Muscle	Hdac4	S	630	Q6NZM9
Hdac4.2	TRUE	FALSE	TRUE	Hdac4.2	Muscle	Hdac4	S	562	Q6NZM9
Hdac4.3	TRUE	TRUE	TRUE	Hdac4.3	Muscle	Hdac4	S	465	Q6NZM9
Smarcd3	TRUE	TRUE	TRUE	Smarcd3	Muscle	Smarcd3	S	175	Q6P9Z1
Srsf1	TRUE	TRUE	TRUE	Srsf1	Muscle	Srsf1	S	2	Q6PDM2
Srsf1.1	TRUE	TRUE	TRUE	Srsf1.1	Muscle	Srsf1	S	199	Q6PDM2
Mylk	TRUE	TRUE	TRUE	Mylk	Muscle	Mylk	S	355	Q6PDN3
Sort1	TRUE	TRUE	TRUE	Sort1	Muscle	Sort1	S	819	Q6PHU5
Camk2d	TRUE	TRUE	TRUE	Camk2d	Muscle	Camk2d	S	330	Q6PHZ2
Camk2d.1	TRUE	TRUE	TRUE	Camk2d.1	Muscle	Camk2d	S	319	Q6PHZ2
Maml1	TRUE	TRUE	TRUE	Maml1	Muscle	Maml1	S	45	Q6T264
Kdm1a	TRUE	TRUE	TRUE	Kdm1a	Muscle	Kdm1a	S	167	Q6ZQ88
Syne1	TRUE	TRUE	TRUE	Syne1	Muscle	Syne1	S	8308	Q6ZWR6
Cmya5	TRUE	TRUE	FALSE	Cmya5	Muscle	Cmya5	S	1956	Q70KF4
Trpm4	TRUE	FALSE	TRUE	Trpm4	Muscle	Trpm4	S	1207	Q7TN37
Prr14	FALSE	TRUE	TRUE	Prr14	Muscle	Prr14	S	554	Q7TPN9
Prr14.1	FALSE	TRUE	TRUE	Prr14.1	Muscle	Prr14	S	555	Q7TPN9
Nexn	TRUE	TRUE	TRUE	Nexn	Muscle	Nexn	S	16	Q7TPW1
Nexn.1	TRUE	TRUE	TRUE	Nexn.1	Muscle	Nexn	S	296	Q7TPW1
Ccnt2	TRUE	TRUE	TRUE	Ccnt2	Muscle	Ccnt2	S	477	Q7TQK0
Ctdp1	TRUE	TRUE	TRUE	Ctdp1	Muscle	Ctdp1	S	730	Q7TSG2
Ppp1r10	TRUE	TRUE	TRUE	Ppp1r10	Muscle	Ppp1r10	S	313	Q80W00
Flnb	TRUE	TRUE	TRUE	Flnb	Muscle	Flnb	S	2478	Q80X90
Flnb.1	TRUE	FALSE	TRUE	Flnb.1	Muscle	Flnb	S	2481	Q80X90
Flnb.2	TRUE	TRUE	TRUE	Flnb.2	Muscle	Flnb	S	1505	Q80X90
Dlg1	TRUE	TRUE	TRUE	Dlg1	Muscle	Dlg1;Dlg2	S	301;175	Q811D0
Dlg1.1	TRUE	TRUE	TRUE	Dlg1.1	Muscle	Dlg1	S	573	Q811D0
Dlg1.2	TRUE	TRUE	TRUE	Dlg1.2	Muscle	Dlg1	S	575	Q811D0
Dlg1.3	TRUE	FALSE	TRUE	Dlg1.3	Muscle	Dlg1	S	619	Q811D0
Ehd2	TRUE	TRUE	TRUE	Ehd2	Muscle	Ehd2	S	438	Q8BH64
Ehd2.1	TRUE	FALSE	TRUE	Ehd2.1	Muscle	Ehd2	S	470	Q8BH64
Plekhm3	TRUE	TRUE	TRUE	Plekhm3	Muscle	Plekhm3	S	489	Q8BM47
Plekhm3.1	TRUE	TRUE	TRUE	Plekhm3.1	Muscle	Plekhm3	S	132	Q8BM47
Arid5b	TRUE	TRUE	TRUE	Arid5b	Muscle	Arid5b	S	1032	Q8BM75
Rps6kb12	TRUE	TRUE	TRUE	Rps6kb1	Muscle	Rps6kb1	S	447	Q8BSK8
Pbrm1	TRUE	TRUE	TRUE	Pbrm1	Muscle	Pbrm1	S	10	Q8BSQ9
Pbrm1.1	FALSE	TRUE	FALSE	Pbrm1.1	Muscle	Pbrm1	S	343	Q8BSQ9
Pbrm1.2	TRUE	TRUE	TRUE	Pbrm1.2	Muscle	Pbrm1	S	353	Q8BSQ9
Pbrm1.3	TRUE	TRUE	TRUE	Pbrm1.3	Muscle	Pbrm1	S	39	Q8BSQ9
Pbrm1.4	FALSE	FALSE	TRUE	Pbrm1.4	Muscle	Pbrm1	S	371	Q8BSQ9
Flna	TRUE	TRUE	TRUE	Flna	Muscle	Flna	S	1084	Q8BTM8
Flna.1	TRUE	TRUE	TRUE	Flna.1	Muscle	Flna	S	2152	Q8BTM8
Flna.2	FALSE	TRUE	TRUE	Flna.2	Muscle	Flna	S	2158	Q8BTM8
Flna.3	FALSE	FALSE	TRUE	Flna.3	Muscle	Flna	S	2163	Q8BTM8
Flna.4	TRUE	TRUE	TRUE	Flna.4	Muscle	Flna	S	2180	Q8BTM8
Flna.5	TRUE	TRUE	TRUE	Flna.5	Muscle	Flna	S	16	Q8BTM8
Flna.6	TRUE	FALSE	TRUE	Flna.6	Muscle	Flna	S	20	Q8BTM8
Flna.7	TRUE	FALSE	FALSE	Flna.7	Muscle	Flna	S	23	Q8BTM8
Flna.8	TRUE	TRUE	TRUE	Flna.8	Muscle	Flna	S	1459	Q8BTM8
Flna.9	TRUE	TRUE	TRUE	Flna.9	Muscle	Flna	S	1518	Q8BTM8
Flna.10	TRUE	TRUE	TRUE	Flna.10	Muscle	Flna	S	2128	Q8BTM8
Flna.11	TRUE	TRUE	TRUE	Flna.11	Muscle	Flna	S	2327	Q8BTM8
Flna.12	TRUE	TRUE	TRUE	Flna.12	Muscle	Flna	S	1010	Q8BTM8
Flna.13	TRUE	TRUE	FALSE	Flna.13	Muscle	Flna	S	1012	Q8BTM8
Flna.14	TRUE	TRUE	TRUE	Flna.14	Muscle	Flna	S	966	Q8BTM8
Flna.15	TRUE	TRUE	TRUE	Flna.15	Muscle	Flna	S	968	Q8BTM8
Flna.16	TRUE	FALSE	FALSE	Flna.16	Muscle	Flna	S	1976	Q8BTM8
Flna.17	TRUE	TRUE	TRUE	Flna.17	Muscle	Flna	S	1630	Q8BTM8
Lmod1	TRUE	TRUE	TRUE	Lmod1	Muscle	Lmod1	S	85	Q8BVA4
Lmod1.1	FALSE	TRUE	TRUE	Lmod1.1	Muscle	Lmod1	S	12	Q8BVA4
Lmod1.2	TRUE	TRUE	TRUE	Lmod1.2	Muscle	Lmod1	S	135	Q8BVA4
Ldlrap1	TRUE	TRUE	TRUE	Ldlrap1	Muscle	Ldlrap1	S	198	Q8C142
Frs2	TRUE	TRUE	TRUE	Frs2	Muscle	Frs2	S	211	Q8C180
Frs2.1	TRUE	TRUE	TRUE	Frs2.1	Muscle	Frs2	S	292	Q8C180
Frs2.2	TRUE	TRUE	TRUE	Frs2.2	Muscle	Frs2	S	503	Q8C180
Frs2.3	TRUE	TRUE	TRUE	Frs2.3	Muscle	Frs2	S	365	Q8C180
Frs2.4	TRUE	TRUE	TRUE	Frs2.4	Muscle	Frs2	S	177	Q8C180
Frs2.5	TRUE	TRUE	TRUE	Frs2.5	Muscle	Frs2	S	327	Q8C180
Frs2.6	TRUE	TRUE	TRUE	Frs2.6	Muscle	Frs2	S	354	Q8C180
Frs2.7	TRUE	TRUE	TRUE	Frs2.7	Muscle	Frs2	S	428	Q8C180
Frs2.8	TRUE	TRUE	TRUE	Frs2.8	Muscle	Frs2	S	35	Q8C180
Frs2.9	TRUE	TRUE	TRUE	Frs2.9	Muscle	Frs2	S	155	Q8C180
Frs2.10	TRUE	FALSE	FALSE	Frs2.10	Muscle	Frs2	S	160	Q8C180
Frs2.11	TRUE	TRUE	TRUE	Frs2.11	Muscle	Frs2	S	161	Q8C180
Hdac7	TRUE	TRUE	TRUE	Hdac7	Muscle	Hdac7	S	582	Q8C2B3
Hdac7.1	TRUE	FALSE	TRUE	Hdac7.1	Muscle	Hdac7	S	560	Q8C2B3
Hdac7.2	FALSE	FALSE	TRUE	Hdac7.2	Muscle	Hdac7	S	204	Q8C2B3
Hdac7.3	TRUE	TRUE	TRUE	Hdac7.3	Muscle	Hdac7	S	398	Q8C2B3
Hdac7.4	TRUE	FALSE	TRUE	Hdac7.4	Muscle	Hdac7	S	178	Q8C2B3
Ank2	TRUE	FALSE	TRUE	Ank2	Muscle	Ank2	S	846	Q8C8R3
Ank2.1	TRUE	FALSE	FALSE	Ank2.1	Muscle	Ank2	S	3786	Q8C8R3
Zfpm2	TRUE	TRUE	FALSE	Zfpm2	Muscle	Zfpm2	S	433	Q8CCH7
Zfpm2.1	TRUE	TRUE	TRUE	Zfpm2.1	Muscle	Zfpm2	S	581	Q8CCH7
Zfpm2.2	TRUE	TRUE	TRUE	Zfpm2.2	Muscle	Zfpm2	S	900	Q8CCH7
Zfpm2.3	TRUE	TRUE	TRUE	Zfpm2.3	Muscle	Zfpm2	S	903	Q8CCH7
Zfpm2.4	TRUE	TRUE	TRUE	Zfpm2.4	Muscle	Zfpm2	S	904	Q8CCH7
Tns21	FALSE	FALSE	TRUE	Tns2	Muscle	Tns2	S	830	Q8CGB6
Tns2.18	TRUE	TRUE	TRUE	Tns2.1	Muscle	Tns2	S	832	Q8CGB6
Tns2.21	TRUE	TRUE	TRUE	Tns2.2	Muscle	Tns2	S	811	Q8CGB6
Tns2.31	TRUE	TRUE	FALSE	Tns2.3	Muscle	Tns2	S	874	Q8CGB6
Tns2.41	TRUE	FALSE	TRUE	Tns2.4	Muscle	Tns2	S	915	Q8CGB6
Tns2.51	TRUE	TRUE	TRUE	Tns2.5	Muscle	Tns2	S	481	Q8CGB6
Tns2.61	TRUE	FALSE	FALSE	Tns2.6	Muscle	Tns2	S	1082	Q8CGB6
Tns2.71	TRUE	TRUE	TRUE	Tns2.7	Muscle	Tns2	S	1087	Q8CGB6
Tns2.81	TRUE	TRUE	TRUE	Tns2.8	Muscle	Tns2	S	941	Q8CGB6
Tns2.91	TRUE	TRUE	TRUE	Tns2.9	Muscle	Tns2	S	931	Q8CGB6
Tns2.101	TRUE	FALSE	FALSE	Tns2.10	Muscle	Tns2	S	118	Q8CGB6
Tns2.111	TRUE	TRUE	TRUE	Tns2.11	Muscle	Tns2	S	120	Q8CGB6
Tns2.121	TRUE	TRUE	TRUE	Tns2.12	Muscle	Tns2	S	1003	Q8CGB6
Trip10	TRUE	TRUE	TRUE	Trip10	Muscle	Trip10	S	296	Q8CJ53
Nfatc4	TRUE	TRUE	TRUE	Nfatc4	Muscle	Nfatc4	S	289	Q8K120
Nfatc4.1	TRUE	TRUE	TRUE	Nfatc4.1	Muscle	Nfatc4	S	334	Q8K120
Svil	TRUE	TRUE	TRUE	Svil	Muscle	Svil	S	666	Q8K4L3
Svil.1	TRUE	TRUE	TRUE	Svil.1	Muscle	Svil	S	1181	Q8K4L3
Svil.2	TRUE	TRUE	TRUE	Svil.2	Muscle	Svil	S	1011	Q8K4L3
Svil.3	TRUE	TRUE	TRUE	Svil.3	Muscle	Svil	S	857	Q8K4L3
Svil.4	TRUE	TRUE	TRUE	Svil.4	Muscle	Svil	S	233	Q8K4L3
Svil.5	TRUE	TRUE	TRUE	Svil.5	Muscle	Svil	S	241	Q8K4L3
Svil.6	TRUE	TRUE	TRUE	Svil.6	Muscle	Svil	S	960	Q8K4L3
Svil.7	TRUE	FALSE	TRUE	Svil.7	Muscle	Svil	S	220	Q8K4L3
Svil.8	TRUE	TRUE	TRUE	Svil.8	Muscle	Svil	S	227	Q8K4L3
Svil.9	TRUE	FALSE	FALSE	Svil.9	Muscle	Svil	S	508	Q8K4L3
Svil.10	TRUE	TRUE	TRUE	Svil.10	Muscle	Svil	S	510	Q8K4L3
Svil.11	TRUE	TRUE	TRUE	Svil.11	Muscle	Svil	S	1278	Q8K4L3
Svil.12	TRUE	TRUE	TRUE	Svil.12	Muscle	Svil	S	632	Q8K4L3
Svil.13	FALSE	TRUE	TRUE	Svil.13	Muscle	Svil	S	634	Q8K4L3
Flcn1	TRUE	TRUE	TRUE	Flcn	Muscle	Flcn	S	62	Q8QZS3
Dock7	FALSE	TRUE	TRUE	Dock7	Muscle	Dock7	S	945	Q8R1A4
Dock7.1	FALSE	TRUE	FALSE	Dock7.1	Muscle	Dock7	S	2119	Q8R1A4
Dock7.2	TRUE	FALSE	TRUE	Dock7.2	Muscle	Dock7	S	862	Q8R1A4
Dock7.3	TRUE	TRUE	TRUE	Dock7.3	Muscle	Dock7	S	864	Q8R1A4
Dock7.4	TRUE	TRUE	TRUE	Dock7.4	Muscle	Dock7	S	1382	Q8R1A4
Dock7.5	TRUE	TRUE	TRUE	Dock7.5	Muscle	Dock7	S	963	Q8R1A4
Dock7.6	TRUE	TRUE	TRUE	Dock7.6	Muscle	Dock7	S	898	Q8R1A4
Dock7.7	TRUE	TRUE	TRUE	Dock7.7	Muscle	Dock7	S	900	Q8R1A4
Dock7.8	TRUE	TRUE	TRUE	Dock7.8	Muscle	Dock7	S	180	Q8R1A4
Dock7.9	TRUE	TRUE	TRUE	Dock7.9	Muscle	Dock7	S	182	Q8R1A4
Dock7.10	TRUE	TRUE	TRUE	Dock7.10	Muscle	Dock7	S	1422	Q8R1A4
Dock7.11	FALSE	FALSE	TRUE	Dock7.11	Muscle	Dock7	S	452	Q8R1A4
Pdlim2	TRUE	TRUE	TRUE	Pdlim2	Muscle	Pdlim2	S	210	Q8R1G6
Pdlim2.1	TRUE	FALSE	FALSE	Pdlim2.1	Muscle	Pdlim2	S	137	Q8R1G6
Pdlim2.2	FALSE	TRUE	FALSE	Pdlim2.2	Muscle	Pdlim2	S	143	Q8R1G6
Pdlim2.3	TRUE	TRUE	TRUE	Pdlim2.3	Muscle	Pdlim2	S	124	Q8R1G6
Pdlim2.4	TRUE	TRUE	TRUE	Pdlim2.4	Muscle	Pdlim2	S	199	Q8R1G6
Pdlim2.5	TRUE	TRUE	TRUE	Pdlim2.5	Muscle	Pdlim2	S	204	Q8R1G6
Pdlim2.6	TRUE	FALSE	FALSE	Pdlim2.6	Muscle	Pdlim2	S	205	Q8R1G6
Rapgef3	TRUE	TRUE	TRUE	Rapgef3	Muscle	Rapgef3	S	859	Q8VCC8
Myh9	TRUE	TRUE	TRUE	Myh9	Muscle	Myh9	S	1114	Q8VDD5
Myh9.1	TRUE	TRUE	TRUE	Myh9.1	Muscle	Myh9	S	1943	Q8VDD5
Hnrnpu	TRUE	TRUE	TRUE	Hnrnpu	Muscle	Hnrnpu	S	247	Q8VEK3
Hnrnpu.1	TRUE	TRUE	TRUE	Hnrnpu.1	Muscle	Hnrnpu	S	58	Q8VEK3
Hnrnpu.2	TRUE	TRUE	TRUE	Hnrnpu.2	Muscle	Hnrnpu	S	4	Q8VEK3
Flnc	TRUE	TRUE	TRUE	Flnc	Muscle	Flnc	S	2234	Q8VHX6
Flnc.1	TRUE	TRUE	TRUE	Flnc.1	Muscle	Flnc	S	2237	Q8VHX6
Flnc.2	TRUE	TRUE	TRUE	Flnc.2	Muscle	Flnc	S	2603	Q8VHX6
Trex1	FALSE	TRUE	FALSE	Trex1	Muscle	Trex1	S	78	Q91XB0
Egln1	FALSE	TRUE	TRUE	Egln1	Muscle	Egln1	S	131	Q91YE3
Twf1	TRUE	TRUE	TRUE	Twf1	Muscle	Twf1	S	142	Q91YR1
Twf1.1	TRUE	TRUE	TRUE	Twf1.1	Muscle	Twf1	S	143	Q91YR1
Lrp1	TRUE	TRUE	FALSE	Lrp1	Muscle	Lrp1	S	4521	Q91ZX7
Sirt12	TRUE	TRUE	TRUE	Sirt1	Muscle	Sirt1	S	14	Q923E4
Sirt1.12	TRUE	TRUE	TRUE	Sirt1.1	Muscle	Sirt1	S	16	Q923E4
Camk2g	TRUE	TRUE	FALSE	Camk2g	Muscle	Camk2g	S	311	Q923T9
Camk2g.1	FALSE	TRUE	TRUE	Camk2g.1	Muscle	Camk2g	S	384	Q923T9
Myo5a	TRUE	TRUE	TRUE	Myo5a	Muscle	Myo5a	S	600	Q99104
Myo5a.1	TRUE	TRUE	TRUE	Myo5a.1	Muscle	Myo5a	S	1650	Q99104
Errfi1	TRUE	TRUE	TRUE	Errfi1	Muscle	Errfi1	S	301	Q99JZ7
Rbm10	TRUE	TRUE	TRUE	Rbm10	Muscle	Rbm10	S	718	Q99KG3
Rbm10.1	TRUE	TRUE	TRUE	Rbm10.1	Muscle	Rbm10	S	723	Q99KG3
Raf1	FALSE	TRUE	FALSE	Raf1	Muscle	Raf1	S	29	Q99N57
Raf1.1	TRUE	TRUE	TRUE	Raf1.1	Muscle	Raf1	S	43	Q99N57
Raf1.2	FALSE	FALSE	TRUE	Raf1.2	Muscle	Raf1	S	257	Q99N57
Raf1.3	TRUE	FALSE	FALSE	Raf1.3	Muscle	Raf1	S	259	Q99N57
Ankrd17	TRUE	TRUE	TRUE	Ankrd17	Muscle	Ankrd17	S	2401	Q99NH0
Ankrd17.1	TRUE	FALSE	FALSE	Ankrd17.1	Muscle	Ankrd17	S	2406	Q99NH0
Ankrd17.2	FALSE	TRUE	FALSE	Ankrd17.2	Muscle	Ankrd17	S	15	Q99NH0
Nup155	TRUE	TRUE	TRUE	Nup155	Muscle	Nup155	S	992	Q99P88
Rer1	TRUE	TRUE	TRUE	Rer1	Muscle	Rer1	S	95	Q9CQU3
Rer1.1	TRUE	FALSE	FALSE	Rer1.1	Muscle	Rer1	S	100	Q9CQU3
Snw1	TRUE	FALSE	TRUE	Snw1	Muscle	Snw1	S	14	Q9CSN1
Snw1.1	TRUE	TRUE	TRUE	Snw1.1	Muscle	Snw1	S	224	Q9CSN1
Tomm70a	TRUE	TRUE	TRUE	Tomm70a	Muscle	Tomm70a	S	94	Q9CZW5
Cby1	TRUE	TRUE	TRUE	Cby1	Muscle	Cby1	S	20	Q9D1C2
Bcl9	TRUE	TRUE	TRUE	Bcl9	Muscle	Bcl9	S	686	Q9D219
Bcl9.1	FALSE	TRUE	FALSE	Bcl9.1	Muscle	Bcl9	S	688	Q9D219
Prkar1a	TRUE	TRUE	TRUE	Prkar1a	Muscle	Prkar1a	S	83	Q9DBC7
Apbb2	TRUE	TRUE	TRUE	Apbb2	Muscle	Apbb2	S	334	Q9DBR4
Apbb2.1	TRUE	TRUE	TRUE	Apbb2.1	Muscle	Apbb2	S	160	Q9DBR4
Apbb2.2	TRUE	FALSE	FALSE	Apbb2.2	Muscle	Apbb2	S	330	Q9DBR4
Tsc11	TRUE	TRUE	TRUE	Tsc1	Muscle	Tsc1	S	592	Q9EP53
Parva	FALSE	FALSE	TRUE	Parva	Muscle	Parva	S	47	Q9EPC1
Parva.1	FALSE	TRUE	TRUE	Parva.1	Muscle	Parva	S	62	Q9EPC1
Parva.2	TRUE	FALSE	TRUE	Parva.2	Muscle	Parva	S	65	Q9EPC1
Parva.3	TRUE	TRUE	TRUE	Parva.3	Muscle	Parva	S	8	Q9EPC1
Ube4b	TRUE	TRUE	TRUE	Ube4b	Muscle	Ube4b	S	238	Q9ES00
Ube4b.1	TRUE	FALSE	FALSE	Ube4b.1	Muscle	Ube4b	S	103	Q9ES00
Ube4b.2	TRUE	TRUE	TRUE	Ube4b.2	Muscle	Ube4b	S	105	Q9ES00
Tmod3	FALSE	TRUE	FALSE	Tmod3	Muscle	Tmod3	S	71	Q9JHJ0
Ybx3	FALSE	FALSE	TRUE	Ybx3	Muscle	Ybx3	S	358	Q9JKB3
Ybx3.1	TRUE	TRUE	TRUE	Ybx3.1	Muscle	Ybx3	S	2	Q9JKB3
Ybx3.2	TRUE	TRUE	TRUE	Ybx3.2	Muscle	Ybx3	S	33	Q9JKB3
Ybx3.3	TRUE	TRUE	TRUE	Ybx3.3	Muscle	Ybx3	S	37	Q9JKB3
Ybx3.4	TRUE	TRUE	TRUE	Ybx3.4	Muscle	Ybx3	S	52	Q9JKB3
Ybx3.5	TRUE	TRUE	TRUE	Ybx3.5	Muscle	Ybx3	S	328	Q9JKB3
Iqgap1	TRUE	TRUE	TRUE	Iqgap1	Muscle	Iqgap1	S	2	Q9JKF1
Bag3	TRUE	TRUE	TRUE	Bag3	Muscle	Bag3	S	404	Q9JLV1
Bag3.1	TRUE	TRUE	TRUE	Bag3.1	Muscle	Bag3	S	274	Q9JLV1
Bag3.2	TRUE	TRUE	TRUE	Bag3.2	Muscle	Bag3	S	297	Q9JLV1
Bag3.3	FALSE	TRUE	FALSE	Bag3.3	Muscle	Bag3	S	386	Q9JLV1
Bag3.4	TRUE	TRUE	TRUE	Bag3.4	Muscle	Bag3	S	390	Q9JLV1
Srf	TRUE	TRUE	TRUE	Srf	Muscle	Srf	S	217	Q9JM73
Srf.1	TRUE	TRUE	TRUE	Srf.1	Muscle	Srf	S	220	Q9JM73
Srf.2	FALSE	FALSE	TRUE	Srf.2	Muscle	Srf	S	224	Q9JM73
Srf.3	TRUE	TRUE	TRUE	Srf.3	Muscle	Srf	S	97	Q9JM73
Srf.4	TRUE	TRUE	TRUE	Srf.4	Muscle	Srf	S	99	Q9JM73
Ptk2b	TRUE	TRUE	TRUE	Ptk2b	Muscle	Ptk2b	S	375	Q9QVP9
Plec	FALSE	TRUE	FALSE	Plec	Muscle	Plec	S	4381	Q9QXS1
Plec.1	TRUE	TRUE	TRUE	Plec.1	Muscle	Plec	S	4389	Q9QXS1
Plec.2	TRUE	TRUE	TRUE	Plec.2	Muscle	Plec	S	1443	Q9QXS1
Plec.3	TRUE	TRUE	TRUE	Plec.3	Muscle	Plec	S	728	Q9QXS1
Plec.4	FALSE	FALSE	TRUE	Plec.4	Muscle	Plec	S	4620	Q9QXS1
Plec.5	TRUE	TRUE	TRUE	Plec.5	Muscle	Plec	S	4627	Q9QXS1
Plec.6	TRUE	TRUE	TRUE	Plec.6	Muscle	Plec	S	1729	Q9QXS1
Plec.7	TRUE	TRUE	TRUE	Plec.7	Muscle	Plec	S	4649	Q9QXS1
Plec.8	TRUE	TRUE	TRUE	Plec.8	Muscle	Plec	S	114	Q9QXS1
Plec.9	TRUE	TRUE	TRUE	Plec.9	Muscle	Plec	S	4413	Q9QXS1
Dbn1	TRUE	TRUE	TRUE	Dbn1	Muscle	Dbn1	S	274	Q9QXS6
Dbn1.1	TRUE	TRUE	TRUE	Dbn1.1	Muscle	Dbn1	S	141	Q9QXS6
Dbn1.2	TRUE	TRUE	TRUE	Dbn1.2	Muscle	Dbn1	S	142	Q9QXS6
Dbn1.3	TRUE	FALSE	FALSE	Dbn1.3	Muscle	Dbn1	S	385	Q9QXS6
Dbn1.4	TRUE	TRUE	TRUE	Dbn1.4	Muscle	Dbn1	S	387	Q9QXS6
Foxo11	TRUE	TRUE	TRUE	Foxo1	Muscle	Foxo1	S	284	Q9R1E0
Lemd3	TRUE	TRUE	TRUE	Lemd3	Muscle	Lemd3	S	140	Q9WU40
Cav21	TRUE	TRUE	TRUE	Cav2	Muscle	Cav2	S	23	Q9WVC3
Osr1	TRUE	TRUE	TRUE	Osr1	Muscle	Osr1	S	142	Q9WVG7
Foxo3	TRUE	TRUE	TRUE	Foxo3	Muscle	Foxo3	S	7	Q9WVH4
Foxo3.1	FALSE	FALSE	TRUE	Foxo3.1	Muscle	Foxo3	S	12	Q9WVH4
Foxo3.2	TRUE	FALSE	TRUE	Foxo3.2	Muscle	Foxo3	S	298	Q9WVH4
Foxo3.3	TRUE	FALSE	TRUE	Foxo3.3	Muscle	Foxo3	S	299	Q9WVH4
Ehd1	TRUE	TRUE	TRUE	Ehd1	Muscle	Ehd1	S	456	Q9WVK4
Orc1	TRUE	TRUE	TRUE	Orc1	Muscle	Orc1	S	332	Q9Z1N2
Pdpk1	TRUE	TRUE	TRUE	Pdpk1	Muscle	Pdpk1	S	244	Q9Z2A0
Mecp2	FALSE	TRUE	TRUE	Mecp2	Muscle	Mecp2	S	78	Q9Z2D6
Mecp2.1	TRUE	TRUE	TRUE	Mecp2.1	Muscle	Mecp2	S	80	Q9Z2D6
Hdac6	TRUE	TRUE	TRUE	Hdac6	Muscle	Hdac6	S	21	Q9Z2V5
Hdac5	FALSE	FALSE	TRUE	Hdac5	Muscle	Hdac5	S	488	Q9Z2V6
Arid1a.4	FALSE	TRUE	TRUE	Arid1a.4	Muscle	Arid1a	T	1886	A2BH40
Arid1a.5	TRUE	TRUE	TRUE	Arid1a.5	Muscle	Arid1a	T	1874	A2BH40
Atp2b1.4	TRUE	TRUE	TRUE	Atp2b1.4	Muscle	Atp2b1	T	1165	G5E829
Bnip3.2	TRUE	TRUE	TRUE	Bnip3.2	Muscle	Bnip3	T	86	O55003
Pak1.31	TRUE	TRUE	TRUE	Pak1.3	Muscle	Pak1	T	225	O88643
Pak1.41	TRUE	FALSE	FALSE	Pak1.4	Muscle	Pak1	T	229	O88643
Pak1.51	TRUE	FALSE	TRUE	Pak1.5	Muscle	Pak1	T	230	O88643
Pak1.61	TRUE	TRUE	TRUE	Pak1.6	Muscle	Pak1	T	212	O88643
Aldoa.3	TRUE	FALSE	FALSE	Aldoa.3	Muscle	Aldoa	T	37	P05064
Jun.3	TRUE	FALSE	FALSE	Jun.3	Muscle	Jun	T	242	P05627
Cdk1	TRUE	TRUE	TRUE	Cdk1	Muscle	Cdk1;Cdk3;Cdk2	T	14;14;14	P11440
Cdk1.1	TRUE	TRUE	TRUE	Cdk1.1	Muscle	Cdk1	T	161	P11440
Dnmt1.3	TRUE	TRUE	TRUE	Dnmt1.3	Muscle	Dnmt1	T	308	P13864
Gapdh	FALSE	TRUE	FALSE	Gapdh	Muscle	Gapdh	T	180	P16858
Gapdh.1	TRUE	TRUE	TRUE	Gapdh.1	Muscle	Gapdh	T	182	P16858
Eno1.2	TRUE	TRUE	FALSE	Eno1.2	Muscle	Eno1;Eno2;Eno3	T	41;41;41	P17182
Tmsb4x	TRUE	FALSE	TRUE	Tmsb4x	Muscle	Tmsb4x	T	29	P20065
Prkca1	TRUE	TRUE	TRUE	Prkca	Muscle	Prkca	T	638	P20444
Prkca.11	TRUE	TRUE	TRUE	Prkca.1	Muscle	Prkca;Prkcb;Prkcg	T	497;500;514	P20444
Serpine1.1	TRUE	TRUE	TRUE	Serpine1.1	Muscle	Serpine1	T	255	P22777
Mdm2.4	FALSE	FALSE	TRUE	Mdm2.4	Muscle	Mdm2	T	165	P23804
Nfkb1.1	TRUE	TRUE	TRUE	Nfkb1.1	Muscle	Nfkb1	T	942	P25799
Map2k1.2	TRUE	TRUE	TRUE	Map2k1.2	Muscle	Map2k1	T	386	P31938
Stat3.1	TRUE	FALSE	FALSE	Stat3.1	Muscle	Stat3	T	721	P42227
Yap1.15	TRUE	TRUE	TRUE	Yap1.15	Muscle	Yap1	T	48	P46938
Yap1.16	FALSE	FALSE	TRUE	Yap1.16	Muscle	Yap1	T	26	P46938
Yap1.17	FALSE	TRUE	FALSE	Yap1.17	Muscle	Yap1	T	95	P46938
Yap1.18	FALSE	FALSE	TRUE	Yap1.18	Muscle	Yap1	T	104	P46938
Yap1.19	FALSE	FALSE	TRUE	Yap1.19	Muscle	Yap1	T	346	P46938
Lmna.28	TRUE	TRUE	TRUE	Lmna.28	Muscle	Lmna	T	548	P48678
Pkm.2	FALSE	FALSE	TRUE	Pkm.2	Muscle	Pkm	T	95	P52480
Lpar1.1	TRUE	TRUE	FALSE	Lpar1.1	Muscle	Lpar1	T	351	P61793
Mapk1	FALSE	TRUE	FALSE	Mapk1	Muscle	Mapk1	T	183	P63085
Ctnnb1.4	TRUE	FALSE	FALSE	Ctnnb1.4	Muscle	Ctnnb1	T	551	Q02248
Ctnnb1.5	TRUE	TRUE	TRUE	Ctnnb1.5	Muscle	Ctnnb1	T	556	Q02248
Nf1.3	TRUE	TRUE	TRUE	Nf1.3	Muscle	Nf1	T	2516	Q04690
Pdlim7.1	TRUE	TRUE	TRUE	Pdlim7.1	Muscle	Pdlim7	T	96	Q3TJD7
Smarca4.4	TRUE	TRUE	TRUE	Smarca4.4	Muscle	Smarca4	T	1390	Q3TKT4
Smarca4.5	FALSE	FALSE	TRUE	Smarca4.5	Muscle	Smarca4	T	609	Q3TKT4
Xirp2	TRUE	TRUE	TRUE	Xirp2	Muscle	Xirp2	T	1407	Q4U4S6
Xirp2.1	TRUE	TRUE	TRUE	Xirp2.1	Muscle	Xirp2	T	1409	Q4U4S6
Spag9.1	TRUE	TRUE	TRUE	Spag9.1	Muscle	Spag9	T	217	Q58A65
Prkaa1.22	FALSE	TRUE	FALSE	Prkaa1.2	Muscle	Prkaa1	T	355	Q5EG47
Prkaa1.32	TRUE	TRUE	TRUE	Prkaa1.3	Muscle	Prkaa1;Prkaa2	T	183;172	Q5EG47
Ppp1r13l.1	TRUE	FALSE	FALSE	Ppp1r13l.1	Muscle	Ppp1r13l	T	479	Q5I1X5
Cttn.5	FALSE	FALSE	TRUE	Cttn.5	Muscle	Cttn	T	13	Q60598
Cttn.6	TRUE	TRUE	TRUE	Cttn.6	Muscle	Cttn	T	401	Q60598
Slc9a1.3	FALSE	TRUE	TRUE	Slc9a1.3	Muscle	Slc9a1	T	689	Q61165
Ezh2	TRUE	TRUE	TRUE	Ezh2	Muscle	Ezh2	T	482	Q61188
Ezh2.1	TRUE	TRUE	TRUE	Ezh2.1	Muscle	Ezh2	T	487	Q61188
Zfhx3.1	TRUE	TRUE	TRUE	Zfhx3.1	Muscle	Zfhx3	T	428	Q61329
Fxr1.3	TRUE	TRUE	TRUE	Fxr1.3	Muscle	Fxr1	T	398	Q61584
Pdcd4.3	FALSE	FALSE	TRUE	Pdcd4.3	Muscle	Pdcd4	T	93	Q61823
Myh10.3	FALSE	FALSE	TRUE	Myh10.3	Muscle	Myh10	T	1960	Q61879
Npm1.5	TRUE	TRUE	TRUE	Npm1.5	Muscle	Npm1	T	75	Q61937
Npm1.6	TRUE	TRUE	TRUE	Npm1.6	Muscle	Npm1	T	217	Q61937
Dag1	TRUE	TRUE	TRUE	Dag1	Muscle	Dag1	T	788	Q62165
Sorbs1.21	TRUE	TRUE	TRUE	Sorbs1.2	Muscle	Sorbs1	T	184	Q62417
Sorbs1.31	FALSE	TRUE	FALSE	Sorbs1.3	Muscle	Sorbs1	T	435	Q62417
Myof.2	TRUE	TRUE	TRUE	Myof.2	Muscle	Myof	T	172	Q69ZN7
Hdac4.4	TRUE	TRUE	TRUE	Hdac4.4	Muscle	Hdac4	T	463	Q6NZM9
Camk2d.2	FALSE	FALSE	TRUE	Camk2d.2	Muscle	Camk2d	T	331	Q6PHZ2
Camk2d.3	TRUE	TRUE	TRUE	Camk2d.3	Muscle	Camk2d	T	337	Q6PHZ2
Ccnt2.1	TRUE	TRUE	FALSE	Ccnt2.1	Muscle	Ccnt2	T	476	Q7TQK0
Flnb.3	TRUE	TRUE	TRUE	Flnb.3	Muscle	Flnb	T	519	Q80X90
Rps6kb1.12	FALSE	FALSE	TRUE	Rps6kb1.1	Muscle	Rps6kb1	T	444	Q8BSK8
Flna.18	FALSE	TRUE	FALSE	Flna.18	Muscle	Flna	T	2179	Q8BTM8
Flna.19	TRUE	TRUE	TRUE	Flna.19	Muscle	Flna	T	1750	Q8BTM8
Flna.20	FALSE	TRUE	FALSE	Flna.20	Muscle	Flna	T	2336	Q8BTM8
Smad3	TRUE	FALSE	TRUE	Smad3	Muscle	Smad3	T	8	Q8BUN5
Frs2.12	TRUE	FALSE	FALSE	Frs2.12	Muscle	Frs2	T	326	Q8C180
Hdac7.5	TRUE	TRUE	TRUE	Hdac7.5	Muscle	Hdac7	T	404	Q8C2B3
Hdac7.6	FALSE	FALSE	TRUE	Hdac7.6	Muscle	Hdac7	T	342	Q8C2B3
Ank2.2	FALSE	TRUE	TRUE	Ank2.2	Muscle	Ank2	T	853	Q8C8R3
Tns2.131	TRUE	TRUE	TRUE	Tns2.13	Muscle	Tns2	T	937	Q8CGB6
Trip10.1	TRUE	FALSE	FALSE	Trip10.1	Muscle	Trip10	T	302	Q8CJ53
Nfatc4.2	FALSE	FALSE	TRUE	Nfatc4.2	Muscle	Nfatc4	T	333	Q8K120
Svil.14	FALSE	TRUE	FALSE	Svil.14	Muscle	Svil	T	1018	Q8K4L3
Svil.15	FALSE	FALSE	TRUE	Svil.15	Muscle	Svil	T	865	Q8K4L3
Svil.16	TRUE	TRUE	TRUE	Svil.16	Muscle	Svil	T	811	Q8K4L3
Myh9.2	TRUE	FALSE	FALSE	Myh9.2	Muscle	Myh9	T	1657	Q8VDD5
Myh9.3	FALSE	FALSE	TRUE	Myh9.3	Muscle	Myh9	T	1111	Q8VDD5
Myh9.4	TRUE	TRUE	TRUE	Myh9.4	Muscle	Myh9	T	1939	Q8VDD5
Hnrnpu.3	FALSE	TRUE	FALSE	Hnrnpu.3	Muscle	Hnrnpu	T	262	Q8VEK3
Camk2g.2	TRUE	TRUE	TRUE	Camk2g.2	Muscle	Camk2g	T	382	Q923T9
Camk2g.3	TRUE	TRUE	TRUE	Camk2g.3	Muscle	Camk2g	T	287	Q923T9
Med1	TRUE	FALSE	TRUE	Med1	Muscle	Med1	T	805	Q925J9
Med1.1	TRUE	TRUE	TRUE	Med1.1	Muscle	Med1	T	1051	Q925J9
Myo5a.2	TRUE	FALSE	TRUE	Myo5a.2	Muscle	Myo5a	T	1656	Q99104
Cdk9	TRUE	TRUE	TRUE	Cdk9	Muscle	Cdk9	T	186	Q99J95
Bcl9.2	TRUE	TRUE	TRUE	Bcl9.2	Muscle	Bcl9	T	315	Q9D219
Ube4b.3	TRUE	TRUE	TRUE	Ube4b.3	Muscle	Ube4b	T	234	Q9ES00
Bag3.5	TRUE	TRUE	TRUE	Bag3.5	Muscle	Bag3	T	560	Q9JLV1
Plec.10	TRUE	TRUE	TRUE	Plec.10	Muscle	Plec	T	4037	Q9QXS1
Dbn1.5	FALSE	FALSE	TRUE	Dbn1.5	Muscle	Dbn1	T	648	Q9QXS6
Ddx39b	TRUE	TRUE	TRUE	Ddx39b	Muscle	Ddx39b	T	172	Q9Z1N5
Arhgap42	TRUE	FALSE	FALSE	Arhgap42	Muscle	Arhgap42	Y	759	B2RQE8
Cdk1.2	TRUE	TRUE	TRUE	Cdk1.2	Muscle	Cdk1;Cdk3;Cdk2	Y	15;15;15	P11440
Eno1.3	TRUE	TRUE	TRUE	Eno1.3	Muscle	Eno1;Eno2;Eno3	Y	44;44;44	P17182
Pdgfra.3	FALSE	FALSE	TRUE	Pdgfra.3	Muscle	Pdgfra	Y	1018	P26618
Ptk2.2	FALSE	TRUE	TRUE	Ptk2.2	Muscle	Ptk2	Y	576	P34152
Stat3.2	TRUE	TRUE	TRUE	Stat3.2	Muscle	Stat3	Y	705	P42227
Yap1.20	FALSE	TRUE	TRUE	Yap1.20	Muscle	Yap1	Y	392	P46938
Mapk14.1	TRUE	TRUE	TRUE	Mapk14.1	Muscle	Mapk14	Y	182	P47811
Lmna.29	TRUE	FALSE	FALSE	Lmna.29	Muscle	Lmna	Y	211	P48678
Cav1.2	TRUE	TRUE	TRUE	Cav1.2	Muscle	Cav1	Y	14	P49817
Mapk1.1	TRUE	TRUE	TRUE	Mapk1.1	Muscle	Mapk1	Y	185	P63085
Shc1.21	TRUE	TRUE	TRUE	Shc1.2	Muscle	Shc1	Y	423	P98083
Gsk3a.12	TRUE	TRUE	TRUE	Gsk3a.1	Muscle	Gsk3a;Gsk3b	Y	279;216	Q2NL51
Fzd7	FALSE	FALSE	TRUE	Fzd7	Muscle	Fzd7	Y	242	Q61090
Dyrk1b	FALSE	TRUE	TRUE	Dyrk1b	Muscle	Dyrk1b;Dyrk1a	Y	271;319	Q9Z188
Dyrk1b.1	TRUE	TRUE	TRUE	Dyrk1b.1	Muscle	Dyrk1b;Dyrk1a	Y	273;321	Q9Z188
Npm1.7	TRUE	FALSE	FALSE	Npm1.7	Muscle	Npm1	Y	67	Q61937
Pbrm1.5	FALSE	TRUE	FALSE	Pbrm1.5	Muscle	Pbrm1	Y	351	Q8BSQ9
Frs2.13	TRUE	TRUE	TRUE	Frs2.13	Muscle	Frs2	Y	306	Q8C180
Frs2.14	TRUE	TRUE	TRUE	Frs2.14	Muscle	Frs2	Y	349	Q8C180
Frs2.15	TRUE	FALSE	TRUE	Frs2.15	Muscle	Frs2	Y	471	Q8C180
Tns2.141	TRUE	TRUE	TRUE	Tns2.14	Muscle	Tns2	Y	483	Q8CGB6
Tns2.151	TRUE	TRUE	TRUE	Tns2.15	Muscle	Tns2	Y	705	Q8CGB6
Ptk2b.1	TRUE	TRUE	TRUE	Ptk2b.1	Muscle	Ptk2b	Y	580	Q9QVP9
Ddx39b.1	TRUE	TRUE	TRUE	Ddx39b.1	Muscle	Ddx39b	Y	13	Q9Z1N5
Dock5.5	FALSE	TRUE	FALSE	Dock5.5	Muscle	Dock5	S	1788	B2RY04
Atp2b1.5	TRUE	TRUE	TRUE	Atp2b1.5	Muscle	Atp2b1	S	1155	G5E829
Bin1.6	TRUE	TRUE	TRUE	Bin1.6	Muscle	Bin1	S	286	O08539
Bin1.7	TRUE	TRUE	TRUE	Bin1.7	Muscle	Bin1	S	296	O08539
Bin1.8	TRUE	TRUE	TRUE	Bin1.8	Muscle	Bin1	S	298	O08539
Bin1.9	TRUE	TRUE	TRUE	Bin1.9	Muscle	Bin1	S	304	O08539
Bnip3.3	FALSE	FALSE	TRUE	Bnip3.3	Muscle	Bnip3	S	85	O55003
Prkca.21	TRUE	TRUE	TRUE	Prkca.2	Muscle	Prkca	S	657	P20444
Mdm2.5	TRUE	TRUE	TRUE	Mdm2.5	Muscle	Mdm2	S	161	P23804
Mdm2.6	TRUE	TRUE	TRUE	Mdm2.6	Muscle	Mdm2	S	163	P23804
Xrcc5	TRUE	FALSE	TRUE	Xrcc5	Muscle	Xrcc5	S	480	P27641
Hsf1.3	TRUE	FALSE	FALSE	Hsf1.3	Muscle	Hsf1	S	303	P38532
Hsf1.4	TRUE	FALSE	FALSE	Hsf1.4	Muscle	Hsf1	S	307	P38532
Hsf1.5	TRUE	TRUE	TRUE	Hsf1.5	Muscle	Hsf1	S	314	P38532
Hsf1.6	TRUE	TRUE	TRUE	Hsf1.6	Muscle	Hsf1	S	326	P38532
Foxk1.3	TRUE	FALSE	TRUE	Foxk1.3	Muscle	Foxk1	S	402	P42128
Foxk1.4	TRUE	FALSE	TRUE	Foxk1.4	Muscle	Foxk1	S	406	P42128
Yap1.21	TRUE	TRUE	TRUE	Yap1.21	Muscle	Yap1	S	112	P46938
Yap1.22	TRUE	TRUE	FALSE	Yap1.22	Muscle	Yap1	S	113	P46938
Yap1.23	TRUE	TRUE	TRUE	Yap1.23	Muscle	Yap1	S	123	P46938
Yap1.24	TRUE	TRUE	TRUE	Yap1.24	Muscle	Yap1	S	94	P46938
Yap1.25	TRUE	TRUE	TRUE	Yap1.25	Muscle	Yap1	S	90	P46938
Lmna.30	FALSE	TRUE	TRUE	Lmna.30	Muscle	Lmna	S	403	P48678
Lmna.31	TRUE	TRUE	TRUE	Lmna.31	Muscle	Lmna	S	404	P48678
Lmna.32	TRUE	TRUE	TRUE	Lmna.32	Muscle	Lmna	S	407	P48678
Lmna.33	TRUE	TRUE	TRUE	Lmna.33	Muscle	Lmna	S	390	P48678
Lmna.34	TRUE	TRUE	TRUE	Lmna.34	Muscle	Lmna	S	392	P48678
Naca.1	FALSE	TRUE	TRUE	Naca.1	Muscle	Naca	S	151;2123	Q60817
Naca.2	FALSE	TRUE	TRUE	Naca.2	Muscle	Naca	S	166;2138	Q60817
Cttn.7	FALSE	FALSE	TRUE	Cttn.7	Muscle	Cttn	S	405	Q60598
Cttn.8	TRUE	TRUE	TRUE	Cttn.8	Muscle	Cttn	S	407	Q60598
Cttn.9	TRUE	TRUE	TRUE	Cttn.9	Muscle	Cttn	S	417	Q60598
Cttn.10	TRUE	TRUE	TRUE	Cttn.10	Muscle	Cttn	S	418	Q60598
Foxc2.21	TRUE	TRUE	TRUE	Foxc2.2	Muscle	Foxc2	S	239	Q61850
Myh10.4	TRUE	FALSE	TRUE	Myh10.4	Muscle	Myh10	S	1952	Q61879
Myh10.5	TRUE	FALSE	TRUE	Myh10.5	Muscle	Myh10	S	1956	Q61879
Sf1	TRUE	TRUE	TRUE	Sf1	Muscle	Sf1	S	80	Q64213
Sf1.1	TRUE	TRUE	TRUE	Sf1.1	Muscle	Sf1	S	82	Q64213
Bcl9l.3	TRUE	TRUE	TRUE	Bcl9l.3	Muscle	Bcl9l	S	21	Q67FY2
Bcl9l.4	TRUE	TRUE	TRUE	Bcl9l.4	Muscle	Bcl9l	S	25	Q67FY2
Camk2d.4	TRUE	TRUE	TRUE	Camk2d.4	Muscle	Camk2d	S	315	Q6PHZ2
Camk2d.5	TRUE	TRUE	TRUE	Camk2d.5	Muscle	Camk2d	S	319	Q6PHZ2
Pbrm1.6	TRUE	TRUE	TRUE	Pbrm1.6	Muscle	Pbrm1	S	10	Q8BSQ9
Pbrm1.7	TRUE	TRUE	TRUE	Pbrm1.7	Muscle	Pbrm1	S	14	Q8BSQ9
Pbrm1.8	TRUE	TRUE	TRUE	Pbrm1.8	Muscle	Pbrm1	S	371	Q8BSQ9
Pbrm1.9	TRUE	TRUE	TRUE	Pbrm1.9	Muscle	Pbrm1	S	375	Q8BSQ9
Zfpm2.5	TRUE	TRUE	TRUE	Zfpm2.5	Muscle	Zfpm2	S	472	Q8CCH7
Zfpm2.6	TRUE	TRUE	TRUE	Zfpm2.6	Muscle	Zfpm2	S	475	Q8CCH7
Zfpm2.7	FALSE	FALSE	TRUE	Zfpm2.7	Muscle	Zfpm2	S	476	Q8CCH7
Tns2.161	FALSE	FALSE	TRUE	Tns2.16	Muscle	Tns2	S	830	Q8CGB6
Tns2.171	FALSE	FALSE	TRUE	Tns2.17	Muscle	Tns2	S	832	Q8CGB6
Svil.17	TRUE	TRUE	TRUE	Svil.17	Muscle	Svil	S	233	Q8K4L3
Svil.18	TRUE	TRUE	TRUE	Svil.18	Muscle	Svil	S	234	Q8K4L3
Svil.19	TRUE	TRUE	TRUE	Svil.19	Muscle	Svil	S	241	Q8K4L3
Svil.20	TRUE	FALSE	TRUE	Svil.20	Muscle	Svil	S	220	Q8K4L3
Svil.21	TRUE	FALSE	TRUE	Svil.21	Muscle	Svil	S	227	Q8K4L3
Dock7.12	TRUE	TRUE	TRUE	Dock7.12	Muscle	Dock7	S	896	Q8R1A4
Dock7.13	TRUE	TRUE	TRUE	Dock7.13	Muscle	Dock7	S	898	Q8R1A4
Dock7.14	TRUE	TRUE	TRUE	Dock7.14	Muscle	Dock7	S	900	Q8R1A4
Dock7.15	TRUE	FALSE	TRUE	Dock7.15	Muscle	Dock7	S	894	Q8R1A4
Pdlim2.7	FALSE	FALSE	TRUE	Pdlim2.7	Muscle	Pdlim2	S	134	Q8R1G6
Pdlim2.8	FALSE	FALSE	TRUE	Pdlim2.8	Muscle	Pdlim2	S	143	Q8R1G6
Pdlim2.9	TRUE	TRUE	TRUE	Pdlim2.9	Muscle	Pdlim2	S	199	Q8R1G6
Pdlim2.10	TRUE	TRUE	TRUE	Pdlim2.10	Muscle	Pdlim2	S	204	Q8R1G6
Pdlim2.11	TRUE	TRUE	TRUE	Pdlim2.11	Muscle	Pdlim2	S	205	Q8R1G6
Snw1.2	TRUE	TRUE	TRUE	Snw1.2	Muscle	Snw1	S	224	Q9CSN1
Snw1.3	TRUE	TRUE	TRUE	Snw1.3	Muscle	Snw1	S	232	Q9CSN1
Snw1.4	TRUE	FALSE	FALSE	Snw1.4	Muscle	Snw1	S	234	Q9CSN1
Plec.11	FALSE	TRUE	TRUE	Plec.11	Muscle	Plec	S	4396	Q9QXS1
Cav2.11	TRUE	TRUE	TRUE	Cav2.1	Muscle	Cav2	S	20	Q9WVC3
Cav2.21	TRUE	TRUE	TRUE	Cav2.2	Muscle	Cav2	S	23	Q9WVC3
Foxo3.4	TRUE	TRUE	FALSE	Foxo3.4	Muscle	Foxo3	S	7	Q9WVH4
Foxo3.5	TRUE	TRUE	FALSE	Foxo3.5	Muscle	Foxo3	S	12	Q9WVH4
Kcnd2	TRUE	TRUE	TRUE	Kcnd2	Muscle	Kcnd2	S	160	Q9Z0V2
Obscn	TRUE	TRUE	TRUE	Obscn	Muscle	Obscn	T	6263	A2AAJ9
Obscn.1	TRUE	TRUE	TRUE	Obscn.1	Muscle	Obscn	T	6266	A2AAJ9
Obscn.2	TRUE	TRUE	TRUE	Obscn.2	Muscle	Obscn	T	6259	A2AAJ9
Dock5.6	FALSE	TRUE	FALSE	Dock5.6	Muscle	Dock5	T	1793	B2RY04
Atp2b1.6	TRUE	TRUE	TRUE	Atp2b1.6	Muscle	Atp2b1	T	1165	G5E829
Bnip3.4	FALSE	FALSE	TRUE	Bnip3.4	Muscle	Bnip3	T	86	O55003
Cdk1.3	TRUE	TRUE	TRUE	Cdk1.3	Muscle	Cdk1;Cdk3;Cdk2	T	14;14;14	P11440
Prkca.31	TRUE	TRUE	TRUE	Prkca.3	Muscle	Prkca	T	638	P20444
Mdm2.7	TRUE	TRUE	TRUE	Mdm2.7	Muscle	Mdm2	T	165	P23804
Mdm2.8	FALSE	FALSE	TRUE	Mdm2.8	Muscle	Mdm2	T	169	P23804
Xrcc5.1	TRUE	FALSE	TRUE	Xrcc5.1	Muscle	Xrcc5	T	479	P27641
Yap1.26	FALSE	TRUE	FALSE	Yap1.26	Muscle	Yap1	T	126	P46938
Yap1.27	TRUE	TRUE	TRUE	Yap1.27	Muscle	Yap1	T	95	P46938
Yap1.28	TRUE	TRUE	FALSE	Yap1.28	Muscle	Yap1	T	99	P46938
Yap1.29	TRUE	TRUE	TRUE	Yap1.29	Muscle	Yap1	T	104	P46938
Mapk14.2	TRUE	TRUE	TRUE	Mapk14.2	Muscle	Mapk14	T	180	P47811
Lmna.35	TRUE	FALSE	TRUE	Lmna.35	Muscle	Lmna	T	394	P48678
Mapk1.2	FALSE	TRUE	FALSE	Mapk1.2	Muscle	Mapk1	T	179	P63085
Mapk1.3	TRUE	TRUE	TRUE	Mapk1.3	Muscle	Mapk1	T	183	P63085
Cttn.11	TRUE	TRUE	TRUE	Cttn.11	Muscle	Cttn	T	401	Q60598
Sf1.2	FALSE	FALSE	TRUE	Sf1.2	Muscle	Sf1	T	67	Q64213
Kcnd2.1	TRUE	TRUE	TRUE	Kcnd2.1	Muscle	Kcnd2	T	157	Q9Z0V2
Kcnd2.2	TRUE	TRUE	TRUE	Kcnd2.2	Muscle	Kcnd2	T	166	Q9Z0V2
Cdk1.4	TRUE	TRUE	TRUE	Cdk1.4	Muscle	Cdk1;Cdk3;Cdk2	Y	15;15;15	P11440
Mapk14.3	TRUE	TRUE	TRUE	Mapk14.3	Muscle	Mapk14	Y	182	P47811
Mapk1.4	TRUE	TRUE	TRUE	Mapk1.4	Muscle	Mapk1	Y	185	P63085
Cav2.31	TRUE	TRUE	TRUE	Cav2.3	Muscle	Cav2	Y	19	Q9WVC3
Obscn.3	FALSE	TRUE	TRUE	Obscn.3	Muscle	Obscn	S	6271	A2AAJ9
Mamstr	FALSE	TRUE	FALSE	Mamstr	Muscle	Mamstr	S	7	Q0ZCJ7
Mamstr.1	FALSE	TRUE	FALSE	Mamstr.1	Muscle	Mamstr	S	10	Q0ZCJ7
Cttn.12	TRUE	TRUE	TRUE	Cttn.12	Muscle	Cttn	S	405	Q60598
Cttn.13	TRUE	TRUE	TRUE	Cttn.13	Muscle	Cttn	S	407	Q60598
Cttn.14	TRUE	TRUE	TRUE	Cttn.14	Muscle	Cttn	S	417	Q60598
Cttn.15	TRUE	FALSE	FALSE	Cttn.15	Muscle	Cttn	S	418	Q60598
Rps6ka2	TRUE	FALSE	FALSE	Rps6ka2	Muscle	Rps6ka2	S	634	Q9WUT3
Rps6ka2.1	TRUE	FALSE	TRUE	Rps6ka2.1	Muscle	Rps6ka2	S	640	Q9WUT3
Rps6ka2.2	TRUE	TRUE	TRUE	Rps6ka2.2	Muscle	Rps6ka2	S	642	Q9WUT3
Rps6ka2.3	TRUE	TRUE	TRUE	Rps6ka2.3	Muscle	Rps6ka2	S	650	Q9WUT3
Obscn.4	FALSE	TRUE	TRUE	Obscn.4	Muscle	Obscn	T	6266	A2AAJ9
Obscn.5	FALSE	TRUE	TRUE	Obscn.5	Muscle	Obscn	T	6273	A2AAJ9
Cacna1h	TRUE	FALSE	TRUE	Cacna1h	Muscle	Cacna1h	T	1801	O88427
Cacna1h.1	TRUE	FALSE	TRUE	Cacna1h.1	Muscle	Cacna1h	T	1803	O88427
Cacna1h.2	TRUE	FALSE	TRUE	Cacna1h.2	Muscle	Cacna1h	T	1811	O88427
Mamstr.2	FALSE	TRUE	FALSE	Mamstr.2	Muscle	Mamstr	T	2	Q0ZCJ7
Cttn.16	TRUE	TRUE	TRUE	Cttn.16	Muscle	Cttn	T	401	Q60598
Lemd2.4	TRUE	TRUE	TRUE	Lemd2.4	Muscle	Lemd2	Y	316	Q6DVA0
Rps6ka2.4	TRUE	TRUE	TRUE	Rps6ka2.4	Muscle	Rps6ka2	Y	631	Q9WUT3

## Sheet: Specific muscle pathways
go_id	gene	muterm
GO:0003009	Actn3	skeletal muscle contraction
GO:0003010	Actn3	voluntary skeletal muscle contraction
GO:0003012	Actn3	muscle system process
GO:0003012	Akap1	muscle system process
GO:0003012	Akap13	muscle system process
GO:0003012	Aldoa	muscle system process
GO:0003012	Ank2	muscle system process
GO:0003012	Apbb2	muscle system process
GO:0003012	Arhgap42	muscle system process
GO:0003012	Atp2a2	muscle system process
GO:0003012	Atp2b1	muscle system process
GO:0003012	Bin1	muscle system process
GO:0003012	Cacna1h	muscle system process
GO:0003012	Calm1	muscle system process
GO:0003012	Camk2d	muscle system process
GO:0003012	Camk2g	muscle system process
GO:0003012	Cav1	muscle system process
GO:0003012	Cdk9	muscle system process
GO:0003012	Cmya5	muscle system process
GO:0003012	Ctdp1	muscle system process
GO:0003012	Cttn	muscle system process
GO:0003012	Dbn1	muscle system process
GO:0003012	Ddx39b	muscle system process
GO:0003012	Dlg1	muscle system process
GO:0003012	Dock5	muscle system process
GO:0003012	Eno1	muscle system process
GO:0003012	Errfi1	muscle system process
GO:0003012	Ezh2	muscle system process
GO:0003012	Fkbp1a	muscle system process
GO:0003012	Flna	muscle system process
GO:0003012	Foxo1	muscle system process
GO:0003012	Foxo3	muscle system process
GO:0003012	Gsk3a	muscle system process
GO:0003012	Hdac4	muscle system process
GO:0003012	Lmna	muscle system process
GO:0003012	Lmod1	muscle system process
GO:0003012	Map2k1	muscle system process
GO:0003012	Map2k4	muscle system process
GO:0003012	Map2k6	muscle system process
GO:0003012	Mef2a	muscle system process
GO:0003012	Mylk	muscle system process
GO:0003012	Nr3c1	muscle system process
GO:0003012	Nup155	muscle system process
GO:0003012	P2rx3	muscle system process
GO:0003012	Pak1	muscle system process
GO:0003012	Ppp1r13l	muscle system process
GO:0003012	Ppp3ca	muscle system process
GO:0003012	Prkca	muscle system process
GO:0003012	Ptk2	muscle system process
GO:0003012	Shc1	muscle system process
GO:0003012	Sirt1	muscle system process
GO:0003012	Slc9a1	muscle system process
GO:0003012	Slmap	muscle system process
GO:0003012	Smad3	muscle system process
GO:0003012	Sorbs2	muscle system process
GO:0003012	Srf	muscle system process
GO:0003012	Srsf1	muscle system process
GO:0003012	Sumo1	muscle system process
GO:0003012	Tmod3	muscle system process
GO:0003012	Tomm70a	muscle system process
GO:0003012	Tpm1	muscle system process
GO:0003012	Tpm4	muscle system process
GO:0003012	Trip10	muscle system process
GO:0003012	Trpm4	muscle system process
GO:0003012	Twf1	muscle system process
GO:0003056	Arhgap42	regulation of vascular associated smooth muscle contraction
GO:0003056	Atp2b1	regulation of vascular associated smooth muscle contraction
GO:0003056	Dock5	regulation of vascular associated smooth muscle contraction
GO:0003056	Map2k1	regulation of vascular associated smooth muscle contraction
GO:0003221	Zfpm2	right ventricular cardiac muscle tissue morphogenesis
GO:0003228	Trex1	atrial cardiac muscle tissue development
GO:0003229	Ctnnb1	ventricular cardiac muscle tissue development
GO:0003229	Fkbp1a	ventricular cardiac muscle tissue development
GO:0003229	Foxc2	ventricular cardiac muscle tissue development
GO:0003229	Med1	ventricular cardiac muscle tissue development
GO:0003229	Ppp1r13l	ventricular cardiac muscle tissue development
GO:0003229	Rxra	ventricular cardiac muscle tissue development
GO:0003229	Tpm1	ventricular cardiac muscle tissue development
GO:0003229	Ube4b	ventricular cardiac muscle tissue development
GO:0003229	Zfpm2	ventricular cardiac muscle tissue development
GO:0003245	S1pr1	cardiac muscle tissue growth involved in heart morphogenesis
GO:0003298	Akap13	physiological muscle hypertrophy
GO:0003298	Camk2d	physiological muscle hypertrophy
GO:0003298	Ctdp1	physiological muscle hypertrophy
GO:0003298	Ddx39b	physiological muscle hypertrophy
GO:0003298	Gsk3a	physiological muscle hypertrophy
GO:0003298	Map2k4	physiological muscle hypertrophy
GO:0003298	Nr3c1	physiological muscle hypertrophy
GO:0003298	Pak1	physiological muscle hypertrophy
GO:0003298	Sirt1	physiological muscle hypertrophy
GO:0003298	Sorbs2	physiological muscle hypertrophy
GO:0003298	Tomm70a	physiological muscle hypertrophy
GO:0003298	Trip10	physiological muscle hypertrophy
GO:0003299	Atp2a2	muscle hypertrophy in response to stress
GO:0003299	Errfi1	muscle hypertrophy in response to stress
GO:0003299	Ezh2	muscle hypertrophy in response to stress
GO:0003299	Foxo1	muscle hypertrophy in response to stress
GO:0003299	Lmna	muscle hypertrophy in response to stress
GO:0003299	Ppp3ca	muscle hypertrophy in response to stress
GO:0003299	Smad3	muscle hypertrophy in response to stress
GO:0003300	Akap1	cardiac muscle hypertrophy
GO:0003300	Akap13	cardiac muscle hypertrophy
GO:0003300	Atp2a2	cardiac muscle hypertrophy
GO:0003300	Camk2d	cardiac muscle hypertrophy
GO:0003300	Cdk9	cardiac muscle hypertrophy
GO:0003300	Ctdp1	cardiac muscle hypertrophy
GO:0003300	Ddx39b	cardiac muscle hypertrophy
GO:0003300	Errfi1	cardiac muscle hypertrophy
GO:0003300	Ezh2	cardiac muscle hypertrophy
GO:0003300	Foxo1	cardiac muscle hypertrophy
GO:0003300	Gsk3a	cardiac muscle hypertrophy
GO:0003300	Lmna	cardiac muscle hypertrophy
GO:0003300	Map2k4	cardiac muscle hypertrophy
GO:0003300	Mef2a	cardiac muscle hypertrophy
GO:0003300	Nr3c1	cardiac muscle hypertrophy
GO:0003300	Pak1	cardiac muscle hypertrophy
GO:0003300	Ppp3ca	cardiac muscle hypertrophy
GO:0003300	Prkca	cardiac muscle hypertrophy
GO:0003300	Ptk2	cardiac muscle hypertrophy
GO:0003300	Sirt1	cardiac muscle hypertrophy
GO:0003300	Slc9a1	cardiac muscle hypertrophy
GO:0003300	Smad3	cardiac muscle hypertrophy
GO:0003300	Sorbs2	cardiac muscle hypertrophy
GO:0003300	Tomm70a	cardiac muscle hypertrophy
GO:0003300	Trip10	cardiac muscle hypertrophy
GO:0003300	Twf1	cardiac muscle hypertrophy
GO:0003301	Akap13	physiological cardiac muscle hypertrophy
GO:0003301	Camk2d	physiological cardiac muscle hypertrophy
GO:0003301	Ctdp1	physiological cardiac muscle hypertrophy
GO:0003301	Ddx39b	physiological cardiac muscle hypertrophy
GO:0003301	Gsk3a	physiological cardiac muscle hypertrophy
GO:0003301	Map2k4	physiological cardiac muscle hypertrophy
GO:0003301	Nr3c1	physiological cardiac muscle hypertrophy
GO:0003301	Pak1	physiological cardiac muscle hypertrophy
GO:0003301	Sirt1	physiological cardiac muscle hypertrophy
GO:0003301	Sorbs2	physiological cardiac muscle hypertrophy
GO:0003301	Tomm70a	physiological cardiac muscle hypertrophy
GO:0003301	Trip10	physiological cardiac muscle hypertrophy
GO:0005862	Tpm1	muscle thin filament tropomyosin
GO:0005863	Obscn	striated muscle myosin thick filament
GO:0005865	Actn3	striated muscle thin filament
GO:0005865	Lmod1	striated muscle thin filament
GO:0005865	Tmod3	striated muscle thin filament
GO:0005865	Tpm1	striated muscle thin filament
GO:0006936	Actn3	muscle contraction
GO:0006936	Aldoa	muscle contraction
GO:0006936	Ank2	muscle contraction
GO:0006936	Apbb2	muscle contraction
GO:0006936	Arhgap42	muscle contraction
GO:0006936	Atp2a2	muscle contraction
GO:0006936	Atp2b1	muscle contraction
GO:0006936	Bin1	muscle contraction
GO:0006936	Cacna1h	muscle contraction
GO:0006936	Calm1	muscle contraction
GO:0006936	Camk2d	muscle contraction
GO:0006936	Cav1	muscle contraction
GO:0006936	Cttn	muscle contraction
GO:0006936	Dbn1	muscle contraction
GO:0006936	Dlg1	muscle contraction
GO:0006936	Dock5	muscle contraction
GO:0006936	Eno1	muscle contraction
GO:0006936	Fkbp1a	muscle contraction
GO:0006936	Flna	muscle contraction
GO:0006936	Hdac4	muscle contraction
GO:0006936	Lmod1	muscle contraction
GO:0006936	Map2k1	muscle contraction
GO:0006936	Map2k6	muscle contraction
GO:0006936	Mylk	muscle contraction
GO:0006936	Nup155	muscle contraction
GO:0006936	P2rx3	muscle contraction
GO:0006936	Ppp1r13l	muscle contraction
GO:0006936	Prkca	muscle contraction
GO:0006936	Shc1	muscle contraction
GO:0006936	Slc9a1	muscle contraction
GO:0006936	Slmap	muscle contraction
GO:0006936	Srf	muscle contraction
GO:0006936	Srsf1	muscle contraction
GO:0006936	Sumo1	muscle contraction
GO:0006936	Tmod3	muscle contraction
GO:0006936	Tpm1	muscle contraction
GO:0006936	Tpm4	muscle contraction
GO:0006936	Trpm4	muscle contraction
GO:0006937	Actn3	regulation of muscle contraction
GO:0006937	Ank2	regulation of muscle contraction
GO:0006937	Arhgap42	regulation of muscle contraction
GO:0006937	Atp2a2	regulation of muscle contraction
GO:0006937	Atp2b1	regulation of muscle contraction
GO:0006937	Bin1	regulation of muscle contraction
GO:0006937	Cacna1h	regulation of muscle contraction
GO:0006937	Calm1	regulation of muscle contraction
GO:0006937	Cav1	regulation of muscle contraction
GO:0006937	Cttn	regulation of muscle contraction
GO:0006937	Dbn1	regulation of muscle contraction
GO:0006937	Dlg1	regulation of muscle contraction
GO:0006937	Dock5	regulation of muscle contraction
GO:0006937	Eno1	regulation of muscle contraction
GO:0006937	Hdac4	regulation of muscle contraction
GO:0006937	Map2k1	regulation of muscle contraction
GO:0006937	Prkca	regulation of muscle contraction
GO:0006937	Shc1	regulation of muscle contraction
GO:0006937	Slc9a1	regulation of muscle contraction
GO:0006937	Srf	regulation of muscle contraction
GO:0006937	Sumo1	regulation of muscle contraction
GO:0006937	Trpm4	regulation of muscle contraction
GO:0006939	Apbb2	smooth muscle contraction
GO:0006939	Arhgap42	smooth muscle contraction
GO:0006939	Atp2b1	smooth muscle contraction
GO:0006939	Cav1	smooth muscle contraction
GO:0006939	Cttn	smooth muscle contraction
GO:0006939	Dlg1	smooth muscle contraction
GO:0006939	Dock5	smooth muscle contraction
GO:0006939	Map2k1	smooth muscle contraction
GO:0006939	Mylk	smooth muscle contraction
GO:0006939	P2rx3	smooth muscle contraction
GO:0006939	Shc1	smooth muscle contraction
GO:0006939	Srf	smooth muscle contraction
GO:0006940	Arhgap42	regulation of smooth muscle contraction
GO:0006940	Atp2b1	regulation of smooth muscle contraction
GO:0006940	Cav1	regulation of smooth muscle contraction
GO:0006940	Cttn	regulation of smooth muscle contraction
GO:0006940	Dock5	regulation of smooth muscle contraction
GO:0006940	Map2k1	regulation of smooth muscle contraction
GO:0006940	Shc1	regulation of smooth muscle contraction
GO:0006940	Srf	regulation of smooth muscle contraction
GO:0006941	Actn3	striated muscle contraction
GO:0006941	Aldoa	striated muscle contraction
GO:0006941	Ank2	striated muscle contraction
GO:0006941	Atp2a2	striated muscle contraction
GO:0006941	Bin1	striated muscle contraction
GO:0006941	Cacna1h	striated muscle contraction
GO:0006941	Calm1	striated muscle contraction
GO:0006941	Camk2d	striated muscle contraction
GO:0006941	Cav1	striated muscle contraction
GO:0006941	Dlg1	striated muscle contraction
GO:0006941	Flna	striated muscle contraction
GO:0006941	Hdac4	striated muscle contraction
GO:0006941	Map2k6	striated muscle contraction
GO:0006941	Nup155	striated muscle contraction
GO:0006941	Ppp1r13l	striated muscle contraction
GO:0006941	Slc9a1	striated muscle contraction
GO:0006941	Srsf1	striated muscle contraction
GO:0006941	Sumo1	striated muscle contraction
GO:0006941	Tpm1	striated muscle contraction
GO:0006941	Trpm4	striated muscle contraction
GO:0006942	Actn3	regulation of striated muscle contraction
GO:0006942	Ank2	regulation of striated muscle contraction
GO:0006942	Atp2a2	regulation of striated muscle contraction
GO:0006942	Bin1	regulation of striated muscle contraction
GO:0006942	Cacna1h	regulation of striated muscle contraction
GO:0006942	Calm1	regulation of striated muscle contraction
GO:0006942	Cav1	regulation of striated muscle contraction
GO:0006942	Dlg1	regulation of striated muscle contraction
GO:0006942	Hdac4	regulation of striated muscle contraction
GO:0006942	Slc9a1	regulation of striated muscle contraction
GO:0006942	Sumo1	regulation of striated muscle contraction
GO:0006942	Trpm4	regulation of striated muscle contraction
GO:0007517	Actn3	muscle organ development
GO:0007517	Arid5b	muscle organ development
GO:0007517	Bcl9	muscle organ development
GO:0007517	Bcl9l	muscle organ development
GO:0007517	Cav1	muscle organ development
GO:0007517	Cav2	muscle organ development
GO:0007517	Ccnt2	muscle organ development
GO:0007517	Cfl2	muscle organ development
GO:0007517	Chd2	muscle organ development
GO:0007517	Ctnnb1	muscle organ development
GO:0007517	Dag1	muscle organ development
GO:0007517	Egln1	muscle organ development
GO:0007517	Emd	muscle organ development
GO:0007517	Ep300	muscle organ development
GO:0007517	Fkbp1a	muscle organ development
GO:0007517	Flnb	muscle organ development
GO:0007517	Foxc2	muscle organ development
GO:0007517	Foxk1	muscle organ development
GO:0007517	Fxr1	muscle organ development
GO:0007517	Hdac4	muscle organ development
GO:0007517	Hdac5	muscle organ development
GO:0007517	Hdac6	muscle organ development
GO:0007517	Hdac7	muscle organ development
GO:0007517	Hmgcr	muscle organ development
GO:0007517	Lemd2	muscle organ development
GO:0007517	Lemd3	muscle organ development
GO:0007517	Lmna	muscle organ development
GO:0007517	Lrp6	muscle organ development
GO:0007517	Mapk14	muscle organ development
GO:0007517	Med1	muscle organ development
GO:0007517	Mef2d	muscle organ development
GO:0007517	Mylk	muscle organ development
GO:0007517	Naca	muscle organ development
GO:0007517	Nf1	muscle organ development
GO:0007517	Plec	muscle organ development
GO:0007517	Ppp3ca	muscle organ development
GO:0007517	Prkaa1	muscle organ development
GO:0007517	Prr14	muscle organ development
GO:0007517	Rps6kb1	muscle organ development
GO:0007517	Rxra	muscle organ development
GO:0007517	S1pr1	muscle organ development
GO:0007517	Sin3b	muscle organ development
GO:0007517	Sirt1	muscle organ development
GO:0007517	Ski	muscle organ development
GO:0007517	Smad3	muscle organ development
GO:0007517	Snw1	muscle organ development
GO:0007517	Svil	muscle organ development
GO:0007517	Tpm1	muscle organ development
GO:0007517	Ube4b	muscle organ development
GO:0007517	Xirp2	muscle organ development
GO:0007517	Ybx3	muscle organ development
GO:0007517	Zfhx3	muscle organ development
GO:0007517	Zfpm2	muscle organ development
GO:0007519	Actn3	skeletal muscle tissue development
GO:0007519	Bcl9	skeletal muscle tissue development
GO:0007519	Bcl9l	skeletal muscle tissue development
GO:0007519	Cav1	skeletal muscle tissue development
GO:0007519	Cav2	skeletal muscle tissue development
GO:0007519	Ccnt2	skeletal muscle tissue development
GO:0007519	Cfl2	skeletal muscle tissue development
GO:0007519	Ctnnb1	skeletal muscle tissue development
GO:0007519	Emd	skeletal muscle tissue development
GO:0007519	Ep300	skeletal muscle tissue development
GO:0007519	Flnb	skeletal muscle tissue development
GO:0007519	Hdac4	skeletal muscle tissue development
GO:0007519	Hdac5	skeletal muscle tissue development
GO:0007519	Hdac6	skeletal muscle tissue development
GO:0007519	Hmgcr	skeletal muscle tissue development
GO:0007519	Lemd2	skeletal muscle tissue development
GO:0007519	Lemd3	skeletal muscle tissue development
GO:0007519	Mapk14	skeletal muscle tissue development
GO:0007519	Mef2d	skeletal muscle tissue development
GO:0007519	Naca	skeletal muscle tissue development
GO:0007519	Nf1	skeletal muscle tissue development
GO:0007519	Plec	skeletal muscle tissue development
GO:0007519	Ppp3ca	skeletal muscle tissue development
GO:0007519	Prkaa1	skeletal muscle tissue development
GO:0007519	Rps6kb1	skeletal muscle tissue development
GO:0007519	Sin3b	skeletal muscle tissue development
GO:0007519	Ski	skeletal muscle tissue development
GO:0007519	Snw1	skeletal muscle tissue development
GO:0007519	Svil	skeletal muscle tissue development
GO:0007519	Ybx3	skeletal muscle tissue development
GO:0008307	Csrp1	structural constituent of muscle
GO:0008307	Dag1	structural constituent of muscle
GO:0008307	Nexn	structural constituent of muscle
GO:0008307	Obscn	structural constituent of muscle
GO:0008307	Plec	structural constituent of muscle
GO:0010611	Akap1	regulation of cardiac muscle hypertrophy
GO:0010611	Camk2d	regulation of cardiac muscle hypertrophy
GO:0010611	Cdk9	regulation of cardiac muscle hypertrophy
GO:0010611	Ctdp1	regulation of cardiac muscle hypertrophy
GO:0010611	Ddx39b	regulation of cardiac muscle hypertrophy
GO:0010611	Errfi1	regulation of cardiac muscle hypertrophy
GO:0010611	Foxo1	regulation of cardiac muscle hypertrophy
GO:0010611	Gsk3a	regulation of cardiac muscle hypertrophy
GO:0010611	Lmna	regulation of cardiac muscle hypertrophy
GO:0010611	Mef2a	regulation of cardiac muscle hypertrophy
GO:0010611	Nr3c1	regulation of cardiac muscle hypertrophy
GO:0010611	Pak1	regulation of cardiac muscle hypertrophy
GO:0010611	Ppp3ca	regulation of cardiac muscle hypertrophy
GO:0010611	Prkca	regulation of cardiac muscle hypertrophy
GO:0010611	Ptk2	regulation of cardiac muscle hypertrophy
GO:0010611	Sirt1	regulation of cardiac muscle hypertrophy
GO:0010611	Slc9a1	regulation of cardiac muscle hypertrophy
GO:0010611	Smad3	regulation of cardiac muscle hypertrophy
GO:0010611	Tomm70a	regulation of cardiac muscle hypertrophy
GO:0010611	Trip10	regulation of cardiac muscle hypertrophy
GO:0010611	Twf1	regulation of cardiac muscle hypertrophy
GO:0010612	Errfi1	regulation of cardiac muscle adaptation
GO:0010612	Foxo1	regulation of cardiac muscle adaptation
GO:0010612	Lmna	regulation of cardiac muscle adaptation
GO:0010612	Ppp3ca	regulation of cardiac muscle adaptation
GO:0010612	Smad3	regulation of cardiac muscle adaptation
GO:0010613	Camk2d	positive regulation of cardiac muscle hypertrophy
GO:0010613	Cdk9	positive regulation of cardiac muscle hypertrophy
GO:0010613	Ddx39b	positive regulation of cardiac muscle hypertrophy
GO:0010613	Mef2a	positive regulation of cardiac muscle hypertrophy
GO:0010613	Nr3c1	positive regulation of cardiac muscle hypertrophy
GO:0010613	Ppp3ca	positive regulation of cardiac muscle hypertrophy
GO:0010613	Prkca	positive regulation of cardiac muscle hypertrophy
GO:0010613	Ptk2	positive regulation of cardiac muscle hypertrophy
GO:0010613	Sirt1	positive regulation of cardiac muscle hypertrophy
GO:0010613	Slc9a1	positive regulation of cardiac muscle hypertrophy
GO:0010613	Trip10	positive regulation of cardiac muscle hypertrophy
GO:0010613	Twf1	positive regulation of cardiac muscle hypertrophy
GO:0010614	Akap1	negative regulation of cardiac muscle hypertrophy
GO:0010614	Ctdp1	negative regulation of cardiac muscle hypertrophy
GO:0010614	Errfi1	negative regulation of cardiac muscle hypertrophy
GO:0010614	Foxo1	negative regulation of cardiac muscle hypertrophy
GO:0010614	Gsk3a	negative regulation of cardiac muscle hypertrophy
GO:0010614	Lmna	negative regulation of cardiac muscle hypertrophy
GO:0010614	Pak1	negative regulation of cardiac muscle hypertrophy
GO:0010614	Smad3	negative regulation of cardiac muscle hypertrophy
GO:0010614	Tomm70a	negative regulation of cardiac muscle hypertrophy
GO:0010615	Ppp3ca	positive regulation of cardiac muscle adaptation
GO:0010616	Errfi1	negative regulation of cardiac muscle adaptation
GO:0010616	Foxo1	negative regulation of cardiac muscle adaptation
GO:0010616	Lmna	negative regulation of cardiac muscle adaptation
GO:0010616	Smad3	negative regulation of cardiac muscle adaptation
GO:0010656	Acot1	negative regulation of muscle cell apoptotic process
GO:0010656	Bag3	negative regulation of muscle cell apoptotic process
GO:0010656	Cav1	negative regulation of muscle cell apoptotic process
GO:0010656	Dnmt1	negative regulation of muscle cell apoptotic process
GO:0010656	Gapdh	negative regulation of muscle cell apoptotic process
GO:0010656	Hmgcr	negative regulation of muscle cell apoptotic process
GO:0010656	Hmox1	negative regulation of muscle cell apoptotic process
GO:0010656	Hsf1	negative regulation of muscle cell apoptotic process
GO:0010656	Hspa8	negative regulation of muscle cell apoptotic process
GO:0010656	Jak2	negative regulation of muscle cell apoptotic process
GO:0010656	Lrp6	negative regulation of muscle cell apoptotic process
GO:0010656	Naca	negative regulation of muscle cell apoptotic process
GO:0010656	Npm1	negative regulation of muscle cell apoptotic process
GO:0010656	Pdpk1	negative regulation of muscle cell apoptotic process
GO:0010656	Ppp1r10	negative regulation of muscle cell apoptotic process
GO:0010656	Ptk2b	negative regulation of muscle cell apoptotic process
GO:0010656	Rapgef3	negative regulation of muscle cell apoptotic process
GO:0010656	Rgl2	negative regulation of muscle cell apoptotic process
GO:0010656	Sirt1	negative regulation of muscle cell apoptotic process
GO:0010656	Trip10	negative regulation of muscle cell apoptotic process
GO:0010657	Acot1	muscle cell apoptotic process
GO:0010657	Bag3	muscle cell apoptotic process
GO:0010657	Bnip3	muscle cell apoptotic process
GO:0010657	Camk2d	muscle cell apoptotic process
GO:0010657	Casp12	muscle cell apoptotic process
GO:0010657	Cav1	muscle cell apoptotic process
GO:0010657	Dnmt1	muscle cell apoptotic process
GO:0010657	E2f3	muscle cell apoptotic process
GO:0010657	Gapdh	muscle cell apoptotic process
GO:0010657	Hmgcr	muscle cell apoptotic process
GO:0010657	Hmox1	muscle cell apoptotic process
GO:0010657	Hsf1	muscle cell apoptotic process
GO:0010657	Hspa8	muscle cell apoptotic process
GO:0010657	Jak2	muscle cell apoptotic process
GO:0010657	Lrp6	muscle cell apoptotic process
GO:0010657	Map2k4	muscle cell apoptotic process
GO:0010657	Naca	muscle cell apoptotic process
GO:0010657	Npm1	muscle cell apoptotic process
GO:0010657	Pdcd4	muscle cell apoptotic process
GO:0010657	Pdpk1	muscle cell apoptotic process
GO:0010657	Ppp1r10	muscle cell apoptotic process
GO:0010657	Ptk2b	muscle cell apoptotic process
GO:0010657	Rapgef3	muscle cell apoptotic process
GO:0010657	Rbm10	muscle cell apoptotic process
GO:0010657	Rgl2	muscle cell apoptotic process
GO:0010657	Rps6ka2	muscle cell apoptotic process
GO:0010657	Sirt1	muscle cell apoptotic process
GO:0010657	Trip10	muscle cell apoptotic process
GO:0010658	Acot1	striated muscle cell apoptotic process
GO:0010658	Bag3	striated muscle cell apoptotic process
GO:0010658	Bnip3	striated muscle cell apoptotic process
GO:0010658	Camk2d	striated muscle cell apoptotic process
GO:0010658	Casp12	striated muscle cell apoptotic process
GO:0010658	Hmgcr	striated muscle cell apoptotic process
GO:0010658	Hsf1	striated muscle cell apoptotic process
GO:0010658	Hspa8	striated muscle cell apoptotic process
GO:0010658	Jak2	striated muscle cell apoptotic process
GO:0010658	Naca	striated muscle cell apoptotic process
GO:0010658	Npm1	striated muscle cell apoptotic process
GO:0010658	Pdpk1	striated muscle cell apoptotic process
GO:0010658	Ppp1r10	striated muscle cell apoptotic process
GO:0010658	Rapgef3	striated muscle cell apoptotic process
GO:0010658	Rgl2	striated muscle cell apoptotic process
GO:0010658	Rps6ka2	striated muscle cell apoptotic process
GO:0010658	Sirt1	striated muscle cell apoptotic process
GO:0010658	Trip10	striated muscle cell apoptotic process
GO:0010659	Acot1	cardiac muscle cell apoptotic process
GO:0010659	Bnip3	cardiac muscle cell apoptotic process
GO:0010659	Camk2d	cardiac muscle cell apoptotic process
GO:0010659	Hmgcr	cardiac muscle cell apoptotic process
GO:0010659	Hsf1	cardiac muscle cell apoptotic process
GO:0010659	Hspa8	cardiac muscle cell apoptotic process
GO:0010659	Jak2	cardiac muscle cell apoptotic process
GO:0010659	Npm1	cardiac muscle cell apoptotic process
GO:0010659	Pdpk1	cardiac muscle cell apoptotic process
GO:0010659	Ppp1r10	cardiac muscle cell apoptotic process
GO:0010659	Rapgef3	cardiac muscle cell apoptotic process
GO:0010659	Rgl2	cardiac muscle cell apoptotic process
GO:0010659	Rps6ka2	cardiac muscle cell apoptotic process
GO:0010659	Sirt1	cardiac muscle cell apoptotic process
GO:0010659	Trip10	cardiac muscle cell apoptotic process
GO:0010660	Acot1	regulation of muscle cell apoptotic process
GO:0010660	Bag3	regulation of muscle cell apoptotic process
GO:0010660	Bnip3	regulation of muscle cell apoptotic process
GO:0010660	Camk2d	regulation of muscle cell apoptotic process
GO:0010660	Casp12	regulation of muscle cell apoptotic process
GO:0010660	Cav1	regulation of muscle cell apoptotic process
GO:0010660	Dnmt1	regulation of muscle cell apoptotic process
GO:0010660	E2f3	regulation of muscle cell apoptotic process
GO:0010660	Gapdh	regulation of muscle cell apoptotic process
GO:0010660	Hmgcr	regulation of muscle cell apoptotic process
GO:0010660	Hmox1	regulation of muscle cell apoptotic process
GO:0010660	Hsf1	regulation of muscle cell apoptotic process
GO:0010660	Hspa8	regulation of muscle cell apoptotic process
GO:0010660	Jak2	regulation of muscle cell apoptotic process
GO:0010660	Lrp6	regulation of muscle cell apoptotic process
GO:0010660	Map2k4	regulation of muscle cell apoptotic process
GO:0010660	Naca	regulation of muscle cell apoptotic process
GO:0010660	Npm1	regulation of muscle cell apoptotic process
GO:0010660	Pdcd4	regulation of muscle cell apoptotic process
GO:0010660	Pdpk1	regulation of muscle cell apoptotic process
GO:0010660	Ppp1r10	regulation of muscle cell apoptotic process
GO:0010660	Ptk2b	regulation of muscle cell apoptotic process
GO:0010660	Rapgef3	regulation of muscle cell apoptotic process
GO:0010660	Rbm10	regulation of muscle cell apoptotic process
GO:0010660	Rgl2	regulation of muscle cell apoptotic process
GO:0010660	Sirt1	regulation of muscle cell apoptotic process
GO:0010660	Trip10	regulation of muscle cell apoptotic process
GO:0010661	Bnip3	positive regulation of muscle cell apoptotic process
GO:0010661	Camk2d	positive regulation of muscle cell apoptotic process
GO:0010661	Casp12	positive regulation of muscle cell apoptotic process
GO:0010661	E2f3	positive regulation of muscle cell apoptotic process
GO:0010661	Hmgcr	positive regulation of muscle cell apoptotic process
GO:0010661	Map2k4	positive regulation of muscle cell apoptotic process
GO:0010661	Pdcd4	positive regulation of muscle cell apoptotic process
GO:0010661	Rbm10	positive regulation of muscle cell apoptotic process
GO:0010662	Acot1	regulation of striated muscle cell apoptotic process
GO:0010662	Bag3	regulation of striated muscle cell apoptotic process
GO:0010662	Bnip3	regulation of striated muscle cell apoptotic process
GO:0010662	Camk2d	regulation of striated muscle cell apoptotic process
GO:0010662	Casp12	regulation of striated muscle cell apoptotic process
GO:0010662	Hmgcr	regulation of striated muscle cell apoptotic process
GO:0010662	Hsf1	regulation of striated muscle cell apoptotic process
GO:0010662	Hspa8	regulation of striated muscle cell apoptotic process
GO:0010662	Jak2	regulation of striated muscle cell apoptotic process
GO:0010662	Naca	regulation of striated muscle cell apoptotic process
GO:0010662	Npm1	regulation of striated muscle cell apoptotic process
GO:0010662	Pdpk1	regulation of striated muscle cell apoptotic process
GO:0010662	Ppp1r10	regulation of striated muscle cell apoptotic process
GO:0010662	Rapgef3	regulation of striated muscle cell apoptotic process
GO:0010662	Rgl2	regulation of striated muscle cell apoptotic process
GO:0010662	Sirt1	regulation of striated muscle cell apoptotic process
GO:0010662	Trip10	regulation of striated muscle cell apoptotic process
GO:0010663	Bnip3	positive regulation of striated muscle cell apoptotic process
GO:0010663	Camk2d	positive regulation of striated muscle cell apoptotic process
GO:0010663	Casp12	positive regulation of striated muscle cell apoptotic process
GO:0010663	Hmgcr	positive regulation of striated muscle cell apoptotic process
GO:0010664	Acot1	negative regulation of striated muscle cell apoptotic process
GO:0010664	Bag3	negative regulation of striated muscle cell apoptotic process
GO:0010664	Hmgcr	negative regulation of striated muscle cell apoptotic process
GO:0010664	Hsf1	negative regulation of striated muscle cell apoptotic process
GO:0010664	Hspa8	negative regulation of striated muscle cell apoptotic process
GO:0010664	Jak2	negative regulation of striated muscle cell apoptotic process
GO:0010664	Naca	negative regulation of striated muscle cell apoptotic process
GO:0010664	Npm1	negative regulation of striated muscle cell apoptotic process
GO:0010664	Pdpk1	negative regulation of striated muscle cell apoptotic process
GO:0010664	Ppp1r10	negative regulation of striated muscle cell apoptotic process
GO:0010664	Rapgef3	negative regulation of striated muscle cell apoptotic process
GO:0010664	Rgl2	negative regulation of striated muscle cell apoptotic process
GO:0010664	Sirt1	negative regulation of striated muscle cell apoptotic process
GO:0010664	Trip10	negative regulation of striated muscle cell apoptotic process
GO:0010665	Acot1	regulation of cardiac muscle cell apoptotic process
GO:0010665	Bnip3	regulation of cardiac muscle cell apoptotic process
GO:0010665	Camk2d	regulation of cardiac muscle cell apoptotic process
GO:0010665	Hmgcr	regulation of cardiac muscle cell apoptotic process
GO:0010665	Hsf1	regulation of cardiac muscle cell apoptotic process
GO:0010665	Hspa8	regulation of cardiac muscle cell apoptotic process
GO:0010665	Jak2	regulation of cardiac muscle cell apoptotic process
GO:0010665	Npm1	regulation of cardiac muscle cell apoptotic process
GO:0010665	Pdpk1	regulation of cardiac muscle cell apoptotic process
GO:0010665	Ppp1r10	regulation of cardiac muscle cell apoptotic process
GO:0010665	Rapgef3	regulation of cardiac muscle cell apoptotic process
GO:0010665	Rgl2	regulation of cardiac muscle cell apoptotic process
GO:0010665	Sirt1	regulation of cardiac muscle cell apoptotic process
GO:0010665	Trip10	regulation of cardiac muscle cell apoptotic process
GO:0010666	Bnip3	positive regulation of cardiac muscle cell apoptotic process
GO:0010666	Camk2d	positive regulation of cardiac muscle cell apoptotic process
GO:0010666	Hmgcr	positive regulation of cardiac muscle cell apoptotic process
GO:0010667	Acot1	negative regulation of cardiac muscle cell apoptotic process
GO:0010667	Hsf1	negative regulation of cardiac muscle cell apoptotic process
GO:0010667	Hspa8	negative regulation of cardiac muscle cell apoptotic process
GO:0010667	Jak2	negative regulation of cardiac muscle cell apoptotic process
GO:0010667	Npm1	negative regulation of cardiac muscle cell apoptotic process
GO:0010667	Pdpk1	negative regulation of cardiac muscle cell apoptotic process
GO:0010667	Ppp1r10	negative regulation of cardiac muscle cell apoptotic process
GO:0010667	Rapgef3	negative regulation of cardiac muscle cell apoptotic process
GO:0010667	Rgl2	negative regulation of cardiac muscle cell apoptotic process
GO:0010667	Sirt1	negative regulation of cardiac muscle cell apoptotic process
GO:0010667	Trip10	negative regulation of cardiac muscle cell apoptotic process
GO:0010881	Ank2	regulation of cardiac muscle contraction by regulation of the release of sequestered calcium ion
GO:0010882	Ank2	regulation of cardiac muscle contraction by calcium ion signaling
GO:0010882	Atp2a2	regulation of cardiac muscle contraction by calcium ion signaling
GO:0010882	Hdac4	regulation of cardiac muscle contraction by calcium ion signaling
GO:0010882	Slc9a1	regulation of cardiac muscle contraction by calcium ion signaling
GO:0014706	Actn3	striated muscle tissue development
GO:0014706	Akap13	striated muscle tissue development
GO:0014706	Apc	striated muscle tissue development
GO:0014706	Arid1a	striated muscle tissue development
GO:0014706	Arid2	striated muscle tissue development
GO:0014706	Bcl9	striated muscle tissue development
GO:0014706	Bcl9l	striated muscle tissue development
GO:0014706	Camk2d	striated muscle tissue development
GO:0014706	Casp8	striated muscle tissue development
GO:0014706	Cav1	striated muscle tissue development
GO:0014706	Cav2	striated muscle tissue development
GO:0014706	Cby1	striated muscle tissue development
GO:0014706	Ccnt2	striated muscle tissue development
GO:0014706	Cdk1	striated muscle tissue development
GO:0014706	Cfl2	striated muscle tissue development
GO:0014706	Ctdp1	striated muscle tissue development
GO:0014706	Ctnnb1	striated muscle tissue development
GO:0014706	Ddx39b	striated muscle tissue development
GO:0014706	Egln1	striated muscle tissue development
GO:0014706	Emd	striated muscle tissue development
GO:0014706	Ep300	striated muscle tissue development
GO:0014706	Fkbp1a	striated muscle tissue development
GO:0014706	Flnb	striated muscle tissue development
GO:0014706	Foxc2	striated muscle tissue development
GO:0014706	Frs2	striated muscle tissue development
GO:0014706	Fzd7	striated muscle tissue development
GO:0014706	Grem1	striated muscle tissue development
GO:0014706	Gsk3a	striated muscle tissue development
GO:0014706	Hdac2	striated muscle tissue development
GO:0014706	Hdac4	striated muscle tissue development
GO:0014706	Hdac5	striated muscle tissue development
GO:0014706	Hdac6	striated muscle tissue development
GO:0014706	Hdac7	striated muscle tissue development
GO:0014706	Hmgcr	striated muscle tissue development
GO:0014706	Hnrnpu	striated muscle tissue development
GO:0014706	Lemd2	striated muscle tissue development
GO:0014706	Lemd3	striated muscle tissue development
GO:0014706	Lmna	striated muscle tissue development
GO:0014706	Lrp6	striated muscle tissue development
GO:0014706	Maml1	striated muscle tissue development
GO:0014706	Map2k4	striated muscle tissue development
GO:0014706	Mapk1	striated muscle tissue development
GO:0014706	Mapk14	striated muscle tissue development
GO:0014706	Med1	striated muscle tissue development
GO:0014706	Mef2a	striated muscle tissue development
GO:0014706	Mef2d	striated muscle tissue development
GO:0014706	Meis1	striated muscle tissue development
GO:0014706	Myh10	striated muscle tissue development
GO:0014706	Naca	striated muscle tissue development
GO:0014706	Ncam1	striated muscle tissue development
GO:0014706	Nf1	striated muscle tissue development
GO:0014706	Nr3c1	striated muscle tissue development
GO:0014706	Pak1	striated muscle tissue development
GO:0014706	Pdgfra	striated muscle tissue development
GO:0014706	Pdgfrb	striated muscle tissue development
GO:0014706	Plec	striated muscle tissue development
GO:0014706	Ppp1r13l	striated muscle tissue development
GO:0014706	Ppp3ca	striated muscle tissue development
GO:0014706	Prkar1a	striated muscle tissue development
GO:0014706	Prkaa1	striated muscle tissue development
GO:0014706	Rps6kb1	striated muscle tissue development
GO:0014706	Rxra	striated muscle tissue development
GO:0014706	S1pr1	striated muscle tissue development
GO:0014706	Sik1	striated muscle tissue development
GO:0014706	Sin3b	striated muscle tissue development
GO:0014706	Sirt1	striated muscle tissue development
GO:0014706	Ski	striated muscle tissue development
GO:0014706	Slc9a1	striated muscle tissue development
GO:0014706	Smad3	striated muscle tissue development
GO:0014706	Snw1	striated muscle tissue development
GO:0014706	Sorbs2	striated muscle tissue development
GO:0014706	Srf	striated muscle tissue development
GO:0014706	Svil	striated muscle tissue development
GO:0014706	Tomm70a	striated muscle tissue development
GO:0014706	Tpm1	striated muscle tissue development
GO:0014706	Trip10	striated muscle tissue development
GO:0014706	Tsc1	striated muscle tissue development
GO:0014706	Ube4b	striated muscle tissue development
GO:0014706	Xirp2	striated muscle tissue development
GO:0014706	Yap1	striated muscle tissue development
GO:0014706	Ybx3	striated muscle tissue development
GO:0014706	Zfpm2	striated muscle tissue development
GO:0014721	Actn3	twitch skeletal muscle contraction
GO:0014724	Actn3	regulation of twitch skeletal muscle contraction
GO:0014728	Actn3	regulation of the force of skeletal muscle contraction
GO:0014732	Actn3	skeletal muscle atrophy
GO:0014733	Actn3	regulation of skeletal muscle adaptation
GO:0014733	Atp2a2	regulation of skeletal muscle adaptation
GO:0014733	Cmya5	regulation of skeletal muscle adaptation
GO:0014733	Ppp3ca	regulation of skeletal muscle adaptation
GO:0014735	Foxo3	regulation of muscle atrophy
GO:0014737	Foxo3	positive regulation of muscle atrophy
GO:0014741	Akap1	negative regulation of muscle hypertrophy
GO:0014741	Ctdp1	negative regulation of muscle hypertrophy
GO:0014741	Errfi1	negative regulation of muscle hypertrophy
GO:0014741	Foxo1	negative regulation of muscle hypertrophy
GO:0014741	Gsk3a	negative regulation of muscle hypertrophy
GO:0014741	Lmna	negative regulation of muscle hypertrophy
GO:0014741	Pak1	negative regulation of muscle hypertrophy
GO:0014741	Smad3	negative regulation of muscle hypertrophy
GO:0014741	Tomm70a	negative regulation of muscle hypertrophy
GO:0014742	Camk2d	positive regulation of muscle hypertrophy
GO:0014742	Cdk9	positive regulation of muscle hypertrophy
GO:0014742	Ddx39b	positive regulation of muscle hypertrophy
GO:0014742	Mef2a	positive regulation of muscle hypertrophy
GO:0014742	Nr3c1	positive regulation of muscle hypertrophy
GO:0014742	Ppp3ca	positive regulation of muscle hypertrophy
GO:0014742	Prkca	positive regulation of muscle hypertrophy
GO:0014742	Ptk2	positive regulation of muscle hypertrophy
GO:0014742	Sirt1	positive regulation of muscle hypertrophy
GO:0014742	Slc9a1	positive regulation of muscle hypertrophy
GO:0014742	Trip10	positive regulation of muscle hypertrophy
GO:0014742	Twf1	positive regulation of muscle hypertrophy
GO:0014743	Akap1	regulation of muscle hypertrophy
GO:0014743	Camk2d	regulation of muscle hypertrophy
GO:0014743	Cdk9	regulation of muscle hypertrophy
GO:0014743	Ctdp1	regulation of muscle hypertrophy
GO:0014743	Ddx39b	regulation of muscle hypertrophy
GO:0014743	Errfi1	regulation of muscle hypertrophy
GO:0014743	Foxo1	regulation of muscle hypertrophy
GO:0014743	Gsk3a	regulation of muscle hypertrophy
GO:0014743	Lmna	regulation of muscle hypertrophy
GO:0014743	Mef2a	regulation of muscle hypertrophy
GO:0014743	Nr3c1	regulation of muscle hypertrophy
GO:0014743	Pak1	regulation of muscle hypertrophy
GO:0014743	Ppp3ca	regulation of muscle hypertrophy
GO:0014743	Prkca	regulation of muscle hypertrophy
GO:0014743	Ptk2	regulation of muscle hypertrophy
GO:0014743	Sirt1	regulation of muscle hypertrophy
GO:0014743	Slc9a1	regulation of muscle hypertrophy
GO:0014743	Smad3	regulation of muscle hypertrophy
GO:0014743	Tomm70a	regulation of muscle hypertrophy
GO:0014743	Trip10	regulation of muscle hypertrophy
GO:0014743	Twf1	regulation of muscle hypertrophy
GO:0014744	Foxo3	positive regulation of muscle adaptation
GO:0014744	Ppp3ca	positive regulation of muscle adaptation
GO:0014745	Errfi1	negative regulation of muscle adaptation
GO:0014745	Foxo1	negative regulation of muscle adaptation
GO:0014745	Lmna	negative regulation of muscle adaptation
GO:0014745	Smad3	negative regulation of muscle adaptation
GO:0014812	Anxa1	muscle cell migration
GO:0014812	Apex1	muscle cell migration
GO:0014812	Atp7a	muscle cell migration
GO:0014812	Camk2d	muscle cell migration
GO:0014812	Dock5	muscle cell migration
GO:0014812	Dock7	muscle cell migration
GO:0014812	Grb10	muscle cell migration
GO:0014812	Hdac4	muscle cell migration
GO:0014812	Il6st	muscle cell migration
GO:0014812	Iqgap1	muscle cell migration
GO:0014812	Lpar1	muscle cell migration
GO:0014812	Lrp1	muscle cell migration
GO:0014812	Mdm2	muscle cell migration
GO:0014812	Myo5a	muscle cell migration
GO:0014812	Naca	muscle cell migration
GO:0014812	Pak1	muscle cell migration
GO:0014812	Parva	muscle cell migration
GO:0014812	Pdgfrb	muscle cell migration
GO:0014812	Ptk2	muscle cell migration
GO:0014812	Rapgef3	muscle cell migration
GO:0014812	Rps6kb1	muscle cell migration
GO:0014812	Serpine1	muscle cell migration
GO:0014812	Src	muscle cell migration
GO:0014812	Tmsb4x	muscle cell migration
GO:0014812	Tpm1	muscle cell migration
GO:0014819	Actn3	regulation of skeletal muscle contraction
GO:0014820	Mylk	tonic smooth muscle contraction
GO:0014821	Dlg1	phasic smooth muscle contraction
GO:0014821	P2rx3	phasic smooth muscle contraction
GO:0014829	Arhgap42	vascular associated smooth muscle contraction
GO:0014829	Atp2b1	vascular associated smooth muscle contraction
GO:0014829	Dock5	vascular associated smooth muscle contraction
GO:0014829	Map2k1	vascular associated smooth muscle contraction
GO:0014832	P2rx3	urinary bladder smooth muscle contraction
GO:0014834	Ezh2	skeletal muscle satellite cell maintenance involved in skeletal muscle regeneration
GO:0014834	Fzd7	skeletal muscle satellite cell maintenance involved in skeletal muscle regeneration
GO:0014835	Mapk14	myoblast differentiation involved in skeletal muscle regeneration
GO:0014839	Anxa1	myoblast migration involved in skeletal muscle regeneration
GO:0014841	Jak2	skeletal muscle satellite cell proliferation
GO:0014841	Stat3	skeletal muscle satellite cell proliferation
GO:0014842	Jak2	regulation of skeletal muscle satellite cell proliferation
GO:0014842	Stat3	regulation of skeletal muscle satellite cell proliferation
GO:0014848	P2rx3	urinary tract smooth muscle contraction
GO:0014850	Tns2	response to muscle activity
GO:0014855	Apc	striated muscle cell proliferation
GO:0014855	Arid2	striated muscle cell proliferation
GO:0014855	Cdk1	striated muscle cell proliferation
GO:0014855	Ctnnb1	striated muscle cell proliferation
GO:0014855	Foxc2	striated muscle cell proliferation
GO:0014855	Hdac2	striated muscle cell proliferation
GO:0014855	Jak2	striated muscle cell proliferation
GO:0014855	Mapk1	striated muscle cell proliferation
GO:0014855	Mapk14	striated muscle cell proliferation
GO:0014855	Meis1	striated muscle cell proliferation
GO:0014855	Ncam1	striated muscle cell proliferation
GO:0014855	Prkar1a	striated muscle cell proliferation
GO:0014855	Rxra	striated muscle cell proliferation
GO:0014855	Sirt1	striated muscle cell proliferation
GO:0014855	Stat3	striated muscle cell proliferation
GO:0014855	Yap1	striated muscle cell proliferation
GO:0014855	Zfpm2	striated muscle cell proliferation
GO:0014856	Jak2	skeletal muscle cell proliferation
GO:0014856	Sirt1	skeletal muscle cell proliferation
GO:0014856	Stat3	skeletal muscle cell proliferation
GO:0014857	Jak2	regulation of skeletal muscle cell proliferation
GO:0014857	Sirt1	regulation of skeletal muscle cell proliferation
GO:0014857	Stat3	regulation of skeletal muscle cell proliferation
GO:0014858	Jak2	positive regulation of skeletal muscle cell proliferation
GO:0014858	Sirt1	positive regulation of skeletal muscle cell proliferation
GO:0014858	Stat3	positive regulation of skeletal muscle cell proliferation
GO:0014862	Actn3	regulation of skeletal muscle contraction by chemo-mechanical energy conversion
GO:0014870	Actn3	response to muscle inactivity
GO:0014870	Hdac4	response to muscle inactivity
GO:0014874	Actn3	response to stimulus involved in regulation of muscle adaptation
GO:0014874	Hdac4	response to stimulus involved in regulation of muscle adaptation
GO:0014877	Actn3	response to muscle inactivity involved in regulation of muscle adaptation
GO:0014877	Hdac4	response to muscle inactivity involved in regulation of muscle adaptation
GO:0014887	Atp2a2	cardiac muscle adaptation
GO:0014887	Errfi1	cardiac muscle adaptation
GO:0014887	Ezh2	cardiac muscle adaptation
GO:0014887	Foxo1	cardiac muscle adaptation
GO:0014887	Lmna	cardiac muscle adaptation
GO:0014887	Ppp3ca	cardiac muscle adaptation
GO:0014887	Smad3	cardiac muscle adaptation
GO:0014888	Actn3	striated muscle adaptation
GO:0014888	Atp2a2	striated muscle adaptation
GO:0014888	Cmya5	striated muscle adaptation
GO:0014888	Errfi1	striated muscle adaptation
GO:0014888	Ezh2	striated muscle adaptation
GO:0014888	Foxo1	striated muscle adaptation
GO:0014888	Lmna	striated muscle adaptation
GO:0014888	Ppp3ca	striated muscle adaptation
GO:0014888	Smad3	striated muscle adaptation
GO:0014889	Actn3	muscle atrophy
GO:0014889	Foxo3	muscle atrophy
GO:0014891	Actn3	striated muscle atrophy
GO:0014894	Actn3	response to denervation involved in regulation of muscle adaptation
GO:0014894	Hdac4	response to denervation involved in regulation of muscle adaptation
GO:0014896	Akap1	muscle hypertrophy
GO:0014896	Akap13	muscle hypertrophy
GO:0014896	Atp2a2	muscle hypertrophy
GO:0014896	Camk2d	muscle hypertrophy
GO:0014896	Cdk9	muscle hypertrophy
GO:0014896	Ctdp1	muscle hypertrophy
GO:0014896	Ddx39b	muscle hypertrophy
GO:0014896	Errfi1	muscle hypertrophy
GO:0014896	Ezh2	muscle hypertrophy
GO:0014896	Foxo1	muscle hypertrophy
GO:0014896	Gsk3a	muscle hypertrophy
GO:0014896	Lmna	muscle hypertrophy
GO:0014896	Map2k4	muscle hypertrophy
GO:0014896	Mef2a	muscle hypertrophy
GO:0014896	Nr3c1	muscle hypertrophy
GO:0014896	Pak1	muscle hypertrophy
GO:0014896	Ppp3ca	muscle hypertrophy
GO:0014896	Prkca	muscle hypertrophy
GO:0014896	Ptk2	muscle hypertrophy
GO:0014896	Sirt1	muscle hypertrophy
GO:0014896	Slc9a1	muscle hypertrophy
GO:0014896	Smad3	muscle hypertrophy
GO:0014896	Sorbs2	muscle hypertrophy
GO:0014896	Tomm70a	muscle hypertrophy
GO:0014896	Trip10	muscle hypertrophy
GO:0014896	Twf1	muscle hypertrophy
GO:0014897	Akap1	striated muscle hypertrophy
GO:0014897	Akap13	striated muscle hypertrophy
GO:0014897	Atp2a2	striated muscle hypertrophy
GO:0014897	Camk2d	striated muscle hypertrophy
GO:0014897	Cdk9	striated muscle hypertrophy
GO:0014897	Ctdp1	striated muscle hypertrophy
GO:0014897	Ddx39b	striated muscle hypertrophy
GO:0014897	Errfi1	striated muscle hypertrophy
GO:0014897	Ezh2	striated muscle hypertrophy
GO:0014897	Foxo1	striated muscle hypertrophy
GO:0014897	Gsk3a	striated muscle hypertrophy
GO:0014897	Lmna	striated muscle hypertrophy
GO:0014897	Map2k4	striated muscle hypertrophy
GO:0014897	Mef2a	striated muscle hypertrophy
GO:0014897	Nr3c1	striated muscle hypertrophy
GO:0014897	Pak1	striated muscle hypertrophy
GO:0014897	Ppp3ca	striated muscle hypertrophy
GO:0014897	Prkca	striated muscle hypertrophy
GO:0014897	Ptk2	striated muscle hypertrophy
GO:0014897	Sirt1	striated muscle hypertrophy
GO:0014897	Slc9a1	striated muscle hypertrophy
GO:0014897	Smad3	striated muscle hypertrophy
GO:0014897	Sorbs2	striated muscle hypertrophy
GO:0014897	Tomm70a	striated muscle hypertrophy
GO:0014897	Trip10	striated muscle hypertrophy
GO:0014897	Twf1	striated muscle hypertrophy
GO:0014898	Atp2a2	cardiac muscle hypertrophy in response to stress
GO:0014898	Errfi1	cardiac muscle hypertrophy in response to stress
GO:0014898	Ezh2	cardiac muscle hypertrophy in response to stress
GO:0014898	Foxo1	cardiac muscle hypertrophy in response to stress
GO:0014898	Lmna	cardiac muscle hypertrophy in response to stress
GO:0014898	Ppp3ca	cardiac muscle hypertrophy in response to stress
GO:0014898	Smad3	cardiac muscle hypertrophy in response to stress
GO:0014908	Bcl9	myotube differentiation involved in skeletal muscle regeneration
GO:0014909	Apex1	smooth muscle cell migration
GO:0014909	Atp7a	smooth muscle cell migration
GO:0014909	Camk2d	smooth muscle cell migration
GO:0014909	Dock5	smooth muscle cell migration
GO:0014909	Dock7	smooth muscle cell migration
GO:0014909	Grb10	smooth muscle cell migration
GO:0014909	Hdac4	smooth muscle cell migration
GO:0014909	Il6st	smooth muscle cell migration
GO:0014909	Iqgap1	smooth muscle cell migration
GO:0014909	Lpar1	smooth muscle cell migration
GO:0014909	Lrp1	smooth muscle cell migration
GO:0014909	Mdm2	smooth muscle cell migration
GO:0014909	Myo5a	smooth muscle cell migration
GO:0014909	Pak1	smooth muscle cell migration
GO:0014909	Parva	smooth muscle cell migration
GO:0014909	Pdgfrb	smooth muscle cell migration
GO:0014909	Ptk2	smooth muscle cell migration
GO:0014909	Rapgef3	smooth muscle cell migration
GO:0014909	Rps6kb1	smooth muscle cell migration
GO:0014909	Serpine1	smooth muscle cell migration
GO:0014909	Src	smooth muscle cell migration
GO:0014909	Tmsb4x	smooth muscle cell migration
GO:0014909	Tpm1	smooth muscle cell migration
GO:0014910	Apex1	regulation of smooth muscle cell migration
GO:0014910	Atp7a	regulation of smooth muscle cell migration
GO:0014910	Camk2d	regulation of smooth muscle cell migration
GO:0014910	Dock5	regulation of smooth muscle cell migration
GO:0014910	Dock7	regulation of smooth muscle cell migration
GO:0014910	Hdac4	regulation of smooth muscle cell migration
GO:0014910	Il6st	regulation of smooth muscle cell migration
GO:0014910	Iqgap1	regulation of smooth muscle cell migration
GO:0014910	Lpar1	regulation of smooth muscle cell migration
GO:0014910	Lrp1	regulation of smooth muscle cell migration
GO:0014910	Mdm2	regulation of smooth muscle cell migration
GO:0014910	Myo5a	regulation of smooth muscle cell migration
GO:0014910	Pak1	regulation of smooth muscle cell migration
GO:0014910	Pdgfrb	regulation of smooth muscle cell migration
GO:0014910	Ptk2	regulation of smooth muscle cell migration
GO:0014910	Rapgef3	regulation of smooth muscle cell migration
GO:0014910	Rps6kb1	regulation of smooth muscle cell migration
GO:0014910	Serpine1	regulation of smooth muscle cell migration
GO:0014910	Src	regulation of smooth muscle cell migration
GO:0014910	Tmsb4x	regulation of smooth muscle cell migration
GO:0014910	Tpm1	regulation of smooth muscle cell migration
GO:0014911	Atp7a	positive regulation of smooth muscle cell migration
GO:0014911	Camk2d	positive regulation of smooth muscle cell migration
GO:0014911	Dock5	positive regulation of smooth muscle cell migration
GO:0014911	Dock7	positive regulation of smooth muscle cell migration
GO:0014911	Hdac4	positive regulation of smooth muscle cell migration
GO:0014911	Il6st	positive regulation of smooth muscle cell migration
GO:0014911	Iqgap1	positive regulation of smooth muscle cell migration
GO:0014911	Lpar1	positive regulation of smooth muscle cell migration
GO:0014911	Lrp1	positive regulation of smooth muscle cell migration
GO:0014911	Mdm2	positive regulation of smooth muscle cell migration
GO:0014911	Myo5a	positive regulation of smooth muscle cell migration
GO:0014911	Pak1	positive regulation of smooth muscle cell migration
GO:0014911	Pdgfrb	positive regulation of smooth muscle cell migration
GO:0014911	Ptk2	positive regulation of smooth muscle cell migration
GO:0014911	Rapgef3	positive regulation of smooth muscle cell migration
GO:0014911	Rps6kb1	positive regulation of smooth muscle cell migration
GO:0014911	Src	positive regulation of smooth muscle cell migration
GO:0014911	Tmsb4x	positive regulation of smooth muscle cell migration
GO:0014912	Apex1	negative regulation of smooth muscle cell migration
GO:0014912	Lrp1	negative regulation of smooth muscle cell migration
GO:0014912	Serpine1	negative regulation of smooth muscle cell migration
GO:0014912	Tpm1	negative regulation of smooth muscle cell migration
GO:0016202	Actn3	regulation of striated muscle tissue development
GO:0016202	Ctnnb1	regulation of striated muscle tissue development
GO:0016202	Hdac5	regulation of striated muscle tissue development
GO:0016202	Hdac7	regulation of striated muscle tissue development
GO:0016202	Hmgcr	regulation of striated muscle tissue development
GO:0016202	Naca	regulation of striated muscle tissue development
GO:0016202	Prkaa1	regulation of striated muscle tissue development
GO:0016202	Rps6kb1	regulation of striated muscle tissue development
GO:0016202	Smad3	regulation of striated muscle tissue development
GO:0016202	Ybx3	regulation of striated muscle tissue development
GO:0016203	Dag1	muscle attachment
GO:0030049	Dbn1	muscle filament sliding
GO:0030049	Tpm1	muscle filament sliding
GO:0031443	Actn3	fast-twitch skeletal muscle fiber contraction
GO:0031446	Actn3	regulation of fast-twitch skeletal muscle fiber contraction
GO:0031448	Actn3	positive regulation of fast-twitch skeletal muscle fiber contraction
GO:0032971	Dbn1	regulation of muscle filament sliding
GO:0033002	Apc	muscle cell proliferation
GO:0033002	Arid2	muscle cell proliferation
GO:0033002	Camk2d	muscle cell proliferation
GO:0033002	Cav1	muscle cell proliferation
GO:0033002	Cdk1	muscle cell proliferation
GO:0033002	Cdkn1a	muscle cell proliferation
GO:0033002	Cdkn1b	muscle cell proliferation
GO:0033002	Comt	muscle cell proliferation
GO:0033002	Ctnnb1	muscle cell proliferation
GO:0033002	Cx3cl1	muscle cell proliferation
GO:0033002	Ddx39b	muscle cell proliferation
GO:0033002	Dnmt1	muscle cell proliferation
GO:0033002	Foxc2	muscle cell proliferation
GO:0033002	Frs2	muscle cell proliferation
GO:0033002	Hdac2	muscle cell proliferation
GO:0033002	Hdac4	muscle cell proliferation
GO:0033002	Hmgcr	muscle cell proliferation
GO:0033002	Hmox1	muscle cell proliferation
GO:0033002	Jak2	muscle cell proliferation
GO:0033002	Jun	muscle cell proliferation
GO:0033002	Ldlrap1	muscle cell proliferation
GO:0033002	Mapk1	muscle cell proliferation
GO:0033002	Mapk14	muscle cell proliferation
GO:0033002	Mdm2	muscle cell proliferation
GO:0033002	Mef2d	muscle cell proliferation
GO:0033002	Meis1	muscle cell proliferation
GO:0033002	Ncam1	muscle cell proliferation
GO:0033002	Npr3	muscle cell proliferation
GO:0033002	Orc1	muscle cell proliferation
GO:0033002	Pak1	muscle cell proliferation
GO:0033002	Pdcd4	muscle cell proliferation
GO:0033002	Pdgfrb	muscle cell proliferation
GO:0033002	Prkar1a	muscle cell proliferation
GO:0033002	Prkca	muscle cell proliferation
GO:0033002	Ptk2	muscle cell proliferation
GO:0033002	Ralbp1	muscle cell proliferation
GO:0033002	Rps6kb1	muscle cell proliferation
GO:0033002	Rxra	muscle cell proliferation
GO:0033002	S1pr1	muscle cell proliferation
GO:0033002	Sf1	muscle cell proliferation
GO:0033002	Shc1	muscle cell proliferation
GO:0033002	Sirt1	muscle cell proliferation
GO:0033002	Src	muscle cell proliferation
GO:0033002	Stat3	muscle cell proliferation
GO:0033002	Tpm1	muscle cell proliferation
GO:0033002	Xrcc5	muscle cell proliferation
GO:0033002	Yap1	muscle cell proliferation
GO:0033002	Zfpm2	muscle cell proliferation
GO:0034390	Dnmt1	smooth muscle cell apoptotic process
GO:0034390	E2f3	smooth muscle cell apoptotic process
GO:0034390	Gapdh	smooth muscle cell apoptotic process
GO:0034390	Lrp6	smooth muscle cell apoptotic process
GO:0034390	Map2k4	smooth muscle cell apoptotic process
GO:0034390	Pdcd4	smooth muscle cell apoptotic process
GO:0034390	Rbm10	smooth muscle cell apoptotic process
GO:0034390	Sirt1	smooth muscle cell apoptotic process
GO:0034391	Dnmt1	regulation of smooth muscle cell apoptotic process
GO:0034391	E2f3	regulation of smooth muscle cell apoptotic process
GO:0034391	Gapdh	regulation of smooth muscle cell apoptotic process
GO:0034391	Lrp6	regulation of smooth muscle cell apoptotic process
GO:0034391	Map2k4	regulation of smooth muscle cell apoptotic process
GO:0034391	Pdcd4	regulation of smooth muscle cell apoptotic process
GO:0034391	Rbm10	regulation of smooth muscle cell apoptotic process
GO:0034391	Sirt1	regulation of smooth muscle cell apoptotic process
GO:0034392	Dnmt1	negative regulation of smooth muscle cell apoptotic process
GO:0034392	Gapdh	negative regulation of smooth muscle cell apoptotic process
GO:0034392	Lrp6	negative regulation of smooth muscle cell apoptotic process
GO:0034393	E2f3	positive regulation of smooth muscle cell apoptotic process
GO:0034393	Map2k4	positive regulation of smooth muscle cell apoptotic process
GO:0034393	Pdcd4	positive regulation of smooth muscle cell apoptotic process
GO:0034393	Rbm10	positive regulation of smooth muscle cell apoptotic process
GO:0035886	Ctnnb1	vascular associated smooth muscle cell differentiation
GO:0035886	Dnmt1	vascular associated smooth muscle cell differentiation
GO:0035886	Pbrm1	vascular associated smooth muscle cell differentiation
GO:0035886	Pdcd4	vascular associated smooth muscle cell differentiation
GO:0035886	Pdgfrb	vascular associated smooth muscle cell differentiation
GO:0035886	Smarca2	vascular associated smooth muscle cell differentiation
GO:0035886	Smarca4	vascular associated smooth muscle cell differentiation
GO:0035886	Srf	vascular associated smooth muscle cell differentiation
GO:0035887	Smarca2	aortic smooth muscle cell differentiation
GO:0035887	Smarca4	aortic smooth muscle cell differentiation
GO:0035914	Bcl9	skeletal muscle cell differentiation
GO:0035914	Bcl9l	skeletal muscle cell differentiation
GO:0035914	Emd	skeletal muscle cell differentiation
GO:0035914	Lemd2	skeletal muscle cell differentiation
GO:0035914	Lemd3	skeletal muscle cell differentiation
GO:0035914	Mef2d	skeletal muscle cell differentiation
GO:0035914	Snw1	skeletal muscle cell differentiation
GO:0035994	Jun	response to muscle stretch
GO:0035994	Mapk14	response to muscle stretch
GO:0035994	Nfkb1	response to muscle stretch
GO:0035994	Raf1	response to muscle stretch
GO:0035994	Slc9a1	response to muscle stretch
GO:0042692	Actn3	muscle cell differentiation
GO:0042692	Akap13	muscle cell differentiation
GO:0042692	Ank2	muscle cell differentiation
GO:0042692	Ankrd17	muscle cell differentiation
GO:0042692	Arid1a	muscle cell differentiation
GO:0042692	Atp2a2	muscle cell differentiation
GO:0042692	Bcl9	muscle cell differentiation
GO:0042692	Bin1	muscle cell differentiation
GO:0042692	Bnip2	muscle cell differentiation
GO:0042692	Camk2d	muscle cell differentiation
GO:0042692	Capzb	muscle cell differentiation
GO:0042692	Cav2	muscle cell differentiation
GO:0042692	Cby1	muscle cell differentiation
GO:0042692	Ccnt2	muscle cell differentiation
GO:0042692	Cdk9	muscle cell differentiation
GO:0042692	Cfl2	muscle cell differentiation
GO:0042692	Csrp1	muscle cell differentiation
GO:0042692	Ctdp1	muscle cell differentiation
GO:0042692	Ctnnb1	muscle cell differentiation
GO:0042692	Ddx39b	muscle cell differentiation
GO:0042692	Dnmt1	muscle cell differentiation
GO:0042692	Dyrk1b	muscle cell differentiation
GO:0042692	Ehd1	muscle cell differentiation
GO:0042692	Ehd2	muscle cell differentiation
GO:0042692	Ezh2	muscle cell differentiation
GO:0042692	Flnc	muscle cell differentiation
GO:0042692	Frs2	muscle cell differentiation
GO:0042692	Fzd7	muscle cell differentiation
GO:0042692	Grem1	muscle cell differentiation
GO:0042692	Gsk3a	muscle cell differentiation
GO:0042692	Hdac2	muscle cell differentiation
GO:0042692	Hdac4	muscle cell differentiation
GO:0042692	Hdac5	muscle cell differentiation
GO:0042692	Hdac6	muscle cell differentiation
GO:0042692	Hnrnpu	muscle cell differentiation
GO:0042692	Kdm1a	muscle cell differentiation
GO:0042692	Lmna	muscle cell differentiation
GO:0042692	Lmod1	muscle cell differentiation
GO:0042692	Maml1	muscle cell differentiation
GO:0042692	Mamstr	muscle cell differentiation
GO:0042692	Map2k4	muscle cell differentiation
GO:0042692	Mapk14	muscle cell differentiation
GO:0042692	Mdm2	muscle cell differentiation
GO:0042692	Mecp2	muscle cell differentiation
GO:0042692	Mef2a	muscle cell differentiation
GO:0042692	Myh10	muscle cell differentiation
GO:0042692	Myh9	muscle cell differentiation
GO:0042692	Myof	muscle cell differentiation
GO:0042692	Naca	muscle cell differentiation
GO:0042692	Nfatc4	muscle cell differentiation
GO:0042692	Nr3c1	muscle cell differentiation
GO:0042692	Pak1	muscle cell differentiation
GO:0042692	Pbrm1	muscle cell differentiation
GO:0042692	Pdcd4	muscle cell differentiation
GO:0042692	Pdgfra	muscle cell differentiation
GO:0042692	Pdgfrb	muscle cell differentiation
GO:0042692	Piezo1	muscle cell differentiation
GO:0042692	Plec	muscle cell differentiation
GO:0042692	Ppp3ca	muscle cell differentiation
GO:0042692	Prkar1a	muscle cell differentiation
GO:0042692	Rxra	muscle cell differentiation
GO:0042692	Sik1	muscle cell differentiation
GO:0042692	Sirt1	muscle cell differentiation
GO:0042692	Ski	muscle cell differentiation
GO:0042692	Slc9a1	muscle cell differentiation
GO:0042692	Smarca2	muscle cell differentiation
GO:0042692	Smarca4	muscle cell differentiation
GO:0042692	Smarcd3	muscle cell differentiation
GO:0042692	Sorbs2	muscle cell differentiation
GO:0042692	Sort1	muscle cell differentiation
GO:0042692	Spag9	muscle cell differentiation
GO:0042692	Srf	muscle cell differentiation
GO:0042692	Stim1	muscle cell differentiation
GO:0042692	Syne1	muscle cell differentiation
GO:0042692	Tanc1	muscle cell differentiation
GO:0042692	Tarbp2	muscle cell differentiation
GO:0042692	Tmod3	muscle cell differentiation
GO:0042692	Tmsb4x	muscle cell differentiation
GO:0042692	Tomm70a	muscle cell differentiation
GO:0042692	Tpm1	muscle cell differentiation
GO:0042692	Trip10	muscle cell differentiation
GO:0042692	Tsc1	muscle cell differentiation
GO:0042692	Ybx1	muscle cell differentiation
GO:0042692	Zbed6	muscle cell differentiation
GO:0042692	Zeb1	muscle cell differentiation
GO:0043403	Anxa1	skeletal muscle tissue regeneration
GO:0043403	Bcl9	skeletal muscle tissue regeneration
GO:0043403	Ezh2	skeletal muscle tissue regeneration
GO:0043403	Fzd7	skeletal muscle tissue regeneration
GO:0043403	Mapk14	skeletal muscle tissue regeneration
GO:0043403	Naca	skeletal muscle tissue regeneration
GO:0043403	Pkm	skeletal muscle tissue regeneration
GO:0043403	Tarbp2	skeletal muscle tissue regeneration
GO:0043500	Actn3	muscle adaptation
GO:0043500	Akap1	muscle adaptation
GO:0043500	Atp2a2	muscle adaptation
GO:0043500	Camk2d	muscle adaptation
GO:0043500	Cdk9	muscle adaptation
GO:0043500	Cmya5	muscle adaptation
GO:0043500	Ctdp1	muscle adaptation
GO:0043500	Ddx39b	muscle adaptation
GO:0043500	Errfi1	muscle adaptation
GO:0043500	Ezh2	muscle adaptation
GO:0043500	Foxo1	muscle adaptation
GO:0043500	Foxo3	muscle adaptation
GO:0043500	Gsk3a	muscle adaptation
GO:0043500	Hdac4	muscle adaptation
GO:0043500	Lmna	muscle adaptation
GO:0043500	Mef2a	muscle adaptation
GO:0043500	Nr3c1	muscle adaptation
GO:0043500	Pak1	muscle adaptation
GO:0043500	Ppp3ca	muscle adaptation
GO:0043500	Prkca	muscle adaptation
GO:0043500	Ptk2	muscle adaptation
GO:0043500	Sirt1	muscle adaptation
GO:0043500	Slc9a1	muscle adaptation
GO:0043500	Smad3	muscle adaptation
GO:0043500	Tomm70a	muscle adaptation
GO:0043500	Trip10	muscle adaptation
GO:0043500	Twf1	muscle adaptation
GO:0043501	Actn3	skeletal muscle adaptation
GO:0043501	Atp2a2	skeletal muscle adaptation
GO:0043501	Cmya5	skeletal muscle adaptation
GO:0043501	Ppp3ca	skeletal muscle adaptation
GO:0043502	Actn3	regulation of muscle adaptation
GO:0043502	Akap1	regulation of muscle adaptation
GO:0043502	Atp2a2	regulation of muscle adaptation
GO:0043502	Camk2d	regulation of muscle adaptation
GO:0043502	Cdk9	regulation of muscle adaptation
GO:0043502	Cmya5	regulation of muscle adaptation
GO:0043502	Ctdp1	regulation of muscle adaptation
GO:0043502	Ddx39b	regulation of muscle adaptation
GO:0043502	Errfi1	regulation of muscle adaptation
GO:0043502	Foxo1	regulation of muscle adaptation
GO:0043502	Foxo3	regulation of muscle adaptation
GO:0043502	Gsk3a	regulation of muscle adaptation
GO:0043502	Hdac4	regulation of muscle adaptation
GO:0043502	Lmna	regulation of muscle adaptation
GO:0043502	Mef2a	regulation of muscle adaptation
GO:0043502	Nr3c1	regulation of muscle adaptation
GO:0043502	Pak1	regulation of muscle adaptation
GO:0043502	Ppp3ca	regulation of muscle adaptation
GO:0043502	Prkca	regulation of muscle adaptation
GO:0043502	Ptk2	regulation of muscle adaptation
GO:0043502	Sirt1	regulation of muscle adaptation
GO:0043502	Slc9a1	regulation of muscle adaptation
GO:0043502	Smad3	regulation of muscle adaptation
GO:0043502	Tomm70a	regulation of muscle adaptation
GO:0043502	Trip10	regulation of muscle adaptation
GO:0043502	Twf1	regulation of muscle adaptation
GO:0045843	Hdac5	negative regulation of striated muscle tissue development
GO:0045843	Hdac7	negative regulation of striated muscle tissue development
GO:0045843	Ybx3	negative regulation of striated muscle tissue development
GO:0045844	Actn3	positive regulation of striated muscle tissue development
GO:0045844	Ctnnb1	positive regulation of striated muscle tissue development
GO:0045844	Hmgcr	positive regulation of striated muscle tissue development
GO:0045844	Naca	positive regulation of striated muscle tissue development
GO:0045844	Prkaa1	positive regulation of striated muscle tissue development
GO:0045844	Rps6kb1	positive regulation of striated muscle tissue development
GO:0045932	Arhgap42	negative regulation of muscle contraction
GO:0045932	Bin1	negative regulation of muscle contraction
GO:0045932	Dbn1	negative regulation of muscle contraction
GO:0045932	Dock5	negative regulation of muscle contraction
GO:0045933	Actn3	positive regulation of muscle contraction
GO:0045933	Cttn	positive regulation of muscle contraction
GO:0045933	Eno1	positive regulation of muscle contraction
GO:0045933	Map2k1	positive regulation of muscle contraction
GO:0045933	Srf	positive regulation of muscle contraction
GO:0045986	Arhgap42	negative regulation of smooth muscle contraction
GO:0045986	Dock5	negative regulation of smooth muscle contraction
GO:0045987	Cttn	positive regulation of smooth muscle contraction
GO:0045987	Srf	positive regulation of smooth muscle contraction
GO:0045988	Bin1	negative regulation of striated muscle contraction
GO:0045989	Actn3	positive regulation of striated muscle contraction
GO:0046716	Aldoa	muscle cell cellular homeostasis
GO:0046716	Apc	muscle cell cellular homeostasis
GO:0046716	Bag3	muscle cell cellular homeostasis
GO:0046716	Cfl2	muscle cell cellular homeostasis
GO:0046716	Srf	muscle cell cellular homeostasis
GO:0048630	Actn3	skeletal muscle tissue growth
GO:0048630	Naca	skeletal muscle tissue growth
GO:0048630	Rps6kb1	skeletal muscle tissue growth
GO:0048631	Actn3	regulation of skeletal muscle tissue growth
GO:0048631	Naca	regulation of skeletal muscle tissue growth
GO:0048631	Rps6kb1	regulation of skeletal muscle tissue growth
GO:0048633	Actn3	positive regulation of skeletal muscle tissue growth
GO:0048633	Naca	positive regulation of skeletal muscle tissue growth
GO:0048633	Rps6kb1	positive regulation of skeletal muscle tissue growth
GO:0048634	Actn3	regulation of muscle organ development
GO:0048634	Ctnnb1	regulation of muscle organ development
GO:0048634	Hdac5	regulation of muscle organ development
GO:0048634	Hdac7	regulation of muscle organ development
GO:0048634	Hmgcr	regulation of muscle organ development
GO:0048634	Naca	regulation of muscle organ development
GO:0048634	Prkaa1	regulation of muscle organ development
GO:0048634	Rps6kb1	regulation of muscle organ development
GO:0048634	Smad3	regulation of muscle organ development
GO:0048634	Ybx3	regulation of muscle organ development
GO:0048635	Hdac5	negative regulation of muscle organ development
GO:0048635	Hdac7	negative regulation of muscle organ development
GO:0048635	Ybx3	negative regulation of muscle organ development
GO:0048636	Actn3	positive regulation of muscle organ development
GO:0048636	Ctnnb1	positive regulation of muscle organ development
GO:0048636	Hmgcr	positive regulation of muscle organ development
GO:0048636	Naca	positive regulation of muscle organ development
GO:0048636	Prkaa1	positive regulation of muscle organ development
GO:0048636	Rps6kb1	positive regulation of muscle organ development
GO:0048641	Actn3	regulation of skeletal muscle tissue development
GO:0048641	Ctnnb1	regulation of skeletal muscle tissue development
GO:0048641	Hmgcr	regulation of skeletal muscle tissue development
GO:0048641	Naca	regulation of skeletal muscle tissue development
GO:0048641	Prkaa1	regulation of skeletal muscle tissue development
GO:0048641	Rps6kb1	regulation of skeletal muscle tissue development
GO:0048641	Ybx3	regulation of skeletal muscle tissue development
GO:0048642	Ybx3	negative regulation of skeletal muscle tissue development
GO:0048643	Actn3	positive regulation of skeletal muscle tissue development
GO:0048643	Ctnnb1	positive regulation of skeletal muscle tissue development
GO:0048643	Hmgcr	positive regulation of skeletal muscle tissue development
GO:0048643	Naca	positive regulation of skeletal muscle tissue development
GO:0048643	Prkaa1	positive regulation of skeletal muscle tissue development
GO:0048643	Rps6kb1	positive regulation of skeletal muscle tissue development
GO:0048644	Arid5b	muscle organ morphogenesis
GO:0048644	Ctnnb1	muscle organ morphogenesis
GO:0048644	Egln1	muscle organ morphogenesis
GO:0048644	Fkbp1a	muscle organ morphogenesis
GO:0048644	Foxc2	muscle organ morphogenesis
GO:0048644	Lrp6	muscle organ morphogenesis
GO:0048644	Med1	muscle organ morphogenesis
GO:0048644	Mylk	muscle organ morphogenesis
GO:0048644	Rxra	muscle organ morphogenesis
GO:0048644	S1pr1	muscle organ morphogenesis
GO:0048644	Tpm1	muscle organ morphogenesis
GO:0048644	Ube4b	muscle organ morphogenesis
GO:0048644	Xirp2	muscle organ morphogenesis
GO:0048644	Zfpm2	muscle organ morphogenesis
GO:0048659	Camk2d	smooth muscle cell proliferation
GO:0048659	Cav1	smooth muscle cell proliferation
GO:0048659	Cdkn1a	smooth muscle cell proliferation
GO:0048659	Cdkn1b	smooth muscle cell proliferation
GO:0048659	Comt	smooth muscle cell proliferation
GO:0048659	Ctnnb1	smooth muscle cell proliferation
GO:0048659	Cx3cl1	smooth muscle cell proliferation
GO:0048659	Ddx39b	smooth muscle cell proliferation
GO:0048659	Dnmt1	smooth muscle cell proliferation
GO:0048659	Frs2	smooth muscle cell proliferation
GO:0048659	Hdac4	smooth muscle cell proliferation
GO:0048659	Hmgcr	smooth muscle cell proliferation
GO:0048659	Hmox1	smooth muscle cell proliferation
GO:0048659	Jak2	smooth muscle cell proliferation
GO:0048659	Jun	smooth muscle cell proliferation
GO:0048659	Ldlrap1	smooth muscle cell proliferation
GO:0048659	Mdm2	smooth muscle cell proliferation
GO:0048659	Mef2d	smooth muscle cell proliferation
GO:0048659	Npr3	smooth muscle cell proliferation
GO:0048659	Orc1	smooth muscle cell proliferation
GO:0048659	Pak1	smooth muscle cell proliferation
GO:0048659	Pdcd4	smooth muscle cell proliferation
GO:0048659	Pdgfrb	smooth muscle cell proliferation
GO:0048659	Prkca	smooth muscle cell proliferation
GO:0048659	Ptk2	smooth muscle cell proliferation
GO:0048659	Ralbp1	smooth muscle cell proliferation
GO:0048659	Rps6kb1	smooth muscle cell proliferation
GO:0048659	S1pr1	smooth muscle cell proliferation
GO:0048659	Sf1	smooth muscle cell proliferation
GO:0048659	Shc1	smooth muscle cell proliferation
GO:0048659	Src	smooth muscle cell proliferation
GO:0048659	Tpm1	smooth muscle cell proliferation
GO:0048659	Xrcc5	smooth muscle cell proliferation
GO:0048660	Camk2d	regulation of smooth muscle cell proliferation
GO:0048660	Cav1	regulation of smooth muscle cell proliferation
GO:0048660	Cdkn1a	regulation of smooth muscle cell proliferation
GO:0048660	Cdkn1b	regulation of smooth muscle cell proliferation
GO:0048660	Comt	regulation of smooth muscle cell proliferation
GO:0048660	Ctnnb1	regulation of smooth muscle cell proliferation
GO:0048660	Cx3cl1	regulation of smooth muscle cell proliferation
GO:0048660	Ddx39b	regulation of smooth muscle cell proliferation
GO:0048660	Dnmt1	regulation of smooth muscle cell proliferation
GO:0048660	Frs2	regulation of smooth muscle cell proliferation
GO:0048660	Hdac4	regulation of smooth muscle cell proliferation
GO:0048660	Hmgcr	regulation of smooth muscle cell proliferation
GO:0048660	Hmox1	regulation of smooth muscle cell proliferation
GO:0048660	Jak2	regulation of smooth muscle cell proliferation
GO:0048660	Jun	regulation of smooth muscle cell proliferation
GO:0048660	Ldlrap1	regulation of smooth muscle cell proliferation
GO:0048660	Mdm2	regulation of smooth muscle cell proliferation
GO:0048660	Mef2d	regulation of smooth muscle cell proliferation
GO:0048660	Npr3	regulation of smooth muscle cell proliferation
GO:0048660	Orc1	regulation of smooth muscle cell proliferation
GO:0048660	Pak1	regulation of smooth muscle cell proliferation
GO:0048660	Pdcd4	regulation of smooth muscle cell proliferation
GO:0048660	Pdgfrb	regulation of smooth muscle cell proliferation
GO:0048660	Prkca	regulation of smooth muscle cell proliferation
GO:0048660	Ptk2	regulation of smooth muscle cell proliferation
GO:0048660	Ralbp1	regulation of smooth muscle cell proliferation
GO:0048660	Rps6kb1	regulation of smooth muscle cell proliferation
GO:0048660	S1pr1	regulation of smooth muscle cell proliferation
GO:0048660	Sf1	regulation of smooth muscle cell proliferation
GO:0048660	Shc1	regulation of smooth muscle cell proliferation
GO:0048660	Src	regulation of smooth muscle cell proliferation
GO:0048660	Tpm1	regulation of smooth muscle cell proliferation
GO:0048660	Xrcc5	regulation of smooth muscle cell proliferation
GO:0048661	Camk2d	positive regulation of smooth muscle cell proliferation
GO:0048661	Cx3cl1	positive regulation of smooth muscle cell proliferation
GO:0048661	Ddx39b	positive regulation of smooth muscle cell proliferation
GO:0048661	Dnmt1	positive regulation of smooth muscle cell proliferation
GO:0048661	Frs2	positive regulation of smooth muscle cell proliferation
GO:0048661	Hdac4	positive regulation of smooth muscle cell proliferation
GO:0048661	Hmgcr	positive regulation of smooth muscle cell proliferation
GO:0048661	Hmox1	positive regulation of smooth muscle cell proliferation
GO:0048661	Jak2	positive regulation of smooth muscle cell proliferation
GO:0048661	Jun	positive regulation of smooth muscle cell proliferation
GO:0048661	Ldlrap1	positive regulation of smooth muscle cell proliferation
GO:0048661	Mdm2	positive regulation of smooth muscle cell proliferation
GO:0048661	Mef2d	positive regulation of smooth muscle cell proliferation
GO:0048661	Orc1	positive regulation of smooth muscle cell proliferation
GO:0048661	Pak1	positive regulation of smooth muscle cell proliferation
GO:0048661	Pdgfrb	positive regulation of smooth muscle cell proliferation
GO:0048661	Prkca	positive regulation of smooth muscle cell proliferation
GO:0048661	Ptk2	positive regulation of smooth muscle cell proliferation
GO:0048661	Rps6kb1	positive regulation of smooth muscle cell proliferation
GO:0048661	S1pr1	positive regulation of smooth muscle cell proliferation
GO:0048661	Shc1	positive regulation of smooth muscle cell proliferation
GO:0048661	Src	positive regulation of smooth muscle cell proliferation
GO:0048662	Cav1	negative regulation of smooth muscle cell proliferation
GO:0048662	Cdkn1a	negative regulation of smooth muscle cell proliferation
GO:0048662	Cdkn1b	negative regulation of smooth muscle cell proliferation
GO:0048662	Comt	negative regulation of smooth muscle cell proliferation
GO:0048662	Hmox1	negative regulation of smooth muscle cell proliferation
GO:0048662	Npr3	negative regulation of smooth muscle cell proliferation
GO:0048662	Pdcd4	negative regulation of smooth muscle cell proliferation
GO:0048662	Ralbp1	negative regulation of smooth muscle cell proliferation
GO:0048662	Sf1	negative regulation of smooth muscle cell proliferation
GO:0048662	Tpm1	negative regulation of smooth muscle cell proliferation
GO:0048738	Akap13	cardiac muscle tissue development
GO:0048738	Apc	cardiac muscle tissue development
GO:0048738	Arid1a	cardiac muscle tissue development
GO:0048738	Arid2	cardiac muscle tissue development
GO:0048738	Camk2d	cardiac muscle tissue development
GO:0048738	Casp8	cardiac muscle tissue development
GO:0048738	Cby1	cardiac muscle tissue development
GO:0048738	Cdk1	cardiac muscle tissue development
GO:0048738	Ctdp1	cardiac muscle tissue development
GO:0048738	Ctnnb1	cardiac muscle tissue development
GO:0048738	Ddx39b	cardiac muscle tissue development
GO:0048738	Egln1	cardiac muscle tissue development
GO:0048738	Fkbp1a	cardiac muscle tissue development
GO:0048738	Foxc2	cardiac muscle tissue development
GO:0048738	Frs2	cardiac muscle tissue development
GO:0048738	Fzd7	cardiac muscle tissue development
GO:0048738	Grem1	cardiac muscle tissue development
GO:0048738	Gsk3a	cardiac muscle tissue development
GO:0048738	Hdac2	cardiac muscle tissue development
GO:0048738	Hnrnpu	cardiac muscle tissue development
GO:0048738	Lmna	cardiac muscle tissue development
GO:0048738	Lrp6	cardiac muscle tissue development
GO:0048738	Maml1	cardiac muscle tissue development
GO:0048738	Map2k4	cardiac muscle tissue development
GO:0048738	Mapk1	cardiac muscle tissue development
GO:0048738	Mapk14	cardiac muscle tissue development
GO:0048738	Med1	cardiac muscle tissue development
GO:0048738	Mef2a	cardiac muscle tissue development
GO:0048738	Meis1	cardiac muscle tissue development
GO:0048738	Myh10	cardiac muscle tissue development
GO:0048738	Ncam1	cardiac muscle tissue development
GO:0048738	Nr3c1	cardiac muscle tissue development
GO:0048738	Pak1	cardiac muscle tissue development
GO:0048738	Pdgfra	cardiac muscle tissue development
GO:0048738	Pdgfrb	cardiac muscle tissue development
GO:0048738	Plec	cardiac muscle tissue development
GO:0048738	Ppp1r13l	cardiac muscle tissue development
GO:0048738	Prkar1a	cardiac muscle tissue development
GO:0048738	Rxra	cardiac muscle tissue development
GO:0048738	S1pr1	cardiac muscle tissue development
GO:0048738	Sik1	cardiac muscle tissue development
GO:0048738	Sin3b	cardiac muscle tissue development
GO:0048738	Sirt1	cardiac muscle tissue development
GO:0048738	Slc9a1	cardiac muscle tissue development
GO:0048738	Sorbs2	cardiac muscle tissue development
GO:0048738	Srf	cardiac muscle tissue development
GO:0048738	Tomm70a	cardiac muscle tissue development
GO:0048738	Tpm1	cardiac muscle tissue development
GO:0048738	Trip10	cardiac muscle tissue development
GO:0048738	Tsc1	cardiac muscle tissue development
GO:0048738	Ube4b	cardiac muscle tissue development
GO:0048738	Xirp2	cardiac muscle tissue development
GO:0048738	Yap1	cardiac muscle tissue development
GO:0048738	Zfpm2	cardiac muscle tissue development
GO:0048741	Actn3	skeletal muscle fiber development
GO:0048741	Cav2	skeletal muscle fiber development
GO:0048741	Hdac4	skeletal muscle fiber development
GO:0048741	Hdac5	skeletal muscle fiber development
GO:0048741	Naca	skeletal muscle fiber development
GO:0048741	Plec	skeletal muscle fiber development
GO:0048741	Ppp3ca	skeletal muscle fiber development
GO:0048741	Ski	skeletal muscle fiber development
GO:0048742	Actn3	regulation of skeletal muscle fiber development
GO:0048742	Hdac4	regulation of skeletal muscle fiber development
GO:0048742	Hdac5	regulation of skeletal muscle fiber development
GO:0048742	Naca	regulation of skeletal muscle fiber development
GO:0048743	Actn3	positive regulation of skeletal muscle fiber development
GO:0048745	Ahr	smooth muscle tissue development
GO:0048745	Dlg1	smooth muscle tissue development
GO:0048745	Mylk	smooth muscle tissue development
GO:0048745	Nf1	smooth muscle tissue development
GO:0048745	Osr1	smooth muscle tissue development
GO:0048745	Pdgfrb	smooth muscle tissue development
GO:0048745	Srf	smooth muscle tissue development
GO:0048745	Zfand5	smooth muscle tissue development
GO:0051145	Ankrd17	smooth muscle cell differentiation
GO:0051145	Ctnnb1	smooth muscle cell differentiation
GO:0051145	Dnmt1	smooth muscle cell differentiation
GO:0051145	Mecp2	smooth muscle cell differentiation
GO:0051145	Nfatc4	smooth muscle cell differentiation
GO:0051145	Pbrm1	smooth muscle cell differentiation
GO:0051145	Pdcd4	smooth muscle cell differentiation
GO:0051145	Pdgfrb	smooth muscle cell differentiation
GO:0051145	Sirt1	smooth muscle cell differentiation
GO:0051145	Smarca2	smooth muscle cell differentiation
GO:0051145	Smarca4	smooth muscle cell differentiation
GO:0051145	Smarcd3	smooth muscle cell differentiation
GO:0051145	Srf	smooth muscle cell differentiation
GO:0051145	Tmsb4x	smooth muscle cell differentiation
GO:0051145	Zeb1	smooth muscle cell differentiation
GO:0051146	Actn3	striated muscle cell differentiation
GO:0051146	Akap13	striated muscle cell differentiation
GO:0051146	Arid1a	striated muscle cell differentiation
GO:0051146	Bcl9	striated muscle cell differentiation
GO:0051146	Bnip2	striated muscle cell differentiation
GO:0051146	Camk2d	striated muscle cell differentiation
GO:0051146	Cav2	striated muscle cell differentiation
GO:0051146	Cby1	striated muscle cell differentiation
GO:0051146	Cfl2	striated muscle cell differentiation
GO:0051146	Csrp1	striated muscle cell differentiation
GO:0051146	Ctdp1	striated muscle cell differentiation
GO:0051146	Ddx39b	striated muscle cell differentiation
GO:0051146	Dyrk1b	striated muscle cell differentiation
GO:0051146	Ehd1	striated muscle cell differentiation
GO:0051146	Ehd2	striated muscle cell differentiation
GO:0051146	Ezh2	striated muscle cell differentiation
GO:0051146	Flnc	striated muscle cell differentiation
GO:0051146	Frs2	striated muscle cell differentiation
GO:0051146	Fzd7	striated muscle cell differentiation
GO:0051146	Grem1	striated muscle cell differentiation
GO:0051146	Gsk3a	striated muscle cell differentiation
GO:0051146	Hdac2	striated muscle cell differentiation
GO:0051146	Hdac4	striated muscle cell differentiation
GO:0051146	Hdac5	striated muscle cell differentiation
GO:0051146	Hdac6	striated muscle cell differentiation
GO:0051146	Hnrnpu	striated muscle cell differentiation
GO:0051146	Lmna	striated muscle cell differentiation
GO:0051146	Lmod1	striated muscle cell differentiation
GO:0051146	Maml1	striated muscle cell differentiation
GO:0051146	Mamstr	striated muscle cell differentiation
GO:0051146	Map2k4	striated muscle cell differentiation
GO:0051146	Mapk14	striated muscle cell differentiation
GO:0051146	Mef2a	striated muscle cell differentiation
GO:0051146	Myh10	striated muscle cell differentiation
GO:0051146	Myh9	striated muscle cell differentiation
GO:0051146	Myof	striated muscle cell differentiation
GO:0051146	Naca	striated muscle cell differentiation
GO:0051146	Nr3c1	striated muscle cell differentiation
GO:0051146	Pak1	striated muscle cell differentiation
GO:0051146	Pdgfra	striated muscle cell differentiation
GO:0051146	Pdgfrb	striated muscle cell differentiation
GO:0051146	Piezo1	striated muscle cell differentiation
GO:0051146	Plec	striated muscle cell differentiation
GO:0051146	Ppp3ca	striated muscle cell differentiation
GO:0051146	Prkar1a	striated muscle cell differentiation
GO:0051146	Rxra	striated muscle cell differentiation
GO:0051146	Sik1	striated muscle cell differentiation
GO:0051146	Sirt1	striated muscle cell differentiation
GO:0051146	Ski	striated muscle cell differentiation
GO:0051146	Slc9a1	striated muscle cell differentiation
GO:0051146	Sorbs2	striated muscle cell differentiation
GO:0051146	Sort1	striated muscle cell differentiation
GO:0051146	Spag9	striated muscle cell differentiation
GO:0051146	Srf	striated muscle cell differentiation
GO:0051146	Stim1	striated muscle cell differentiation
GO:0051146	Tanc1	striated muscle cell differentiation
GO:0051146	Tmod3	striated muscle cell differentiation
GO:0051146	Tomm70a	striated muscle cell differentiation
GO:0051146	Tpm1	striated muscle cell differentiation
GO:0051146	Trip10	striated muscle cell differentiation
GO:0051146	Tsc1	striated muscle cell differentiation
GO:0051146	Ybx1	striated muscle cell differentiation
GO:0051147	Actn3	regulation of muscle cell differentiation
GO:0051147	Ankrd17	regulation of muscle cell differentiation
GO:0051147	Ccnt2	regulation of muscle cell differentiation
GO:0051147	Cdk9	regulation of muscle cell differentiation
GO:0051147	Ctdp1	regulation of muscle cell differentiation
GO:0051147	Ddx39b	regulation of muscle cell differentiation
GO:0051147	Dnmt1	regulation of muscle cell differentiation
GO:0051147	Ezh2	regulation of muscle cell differentiation
GO:0051147	Frs2	regulation of muscle cell differentiation
GO:0051147	Fzd7	regulation of muscle cell differentiation
GO:0051147	Grem1	regulation of muscle cell differentiation
GO:0051147	Gsk3a	regulation of muscle cell differentiation
GO:0051147	Hdac4	regulation of muscle cell differentiation
GO:0051147	Hdac5	regulation of muscle cell differentiation
GO:0051147	Maml1	regulation of muscle cell differentiation
GO:0051147	Mamstr	regulation of muscle cell differentiation
GO:0051147	Mapk14	regulation of muscle cell differentiation
GO:0051147	Mdm2	regulation of muscle cell differentiation
GO:0051147	Mecp2	regulation of muscle cell differentiation
GO:0051147	Naca	regulation of muscle cell differentiation
GO:0051147	Nr3c1	regulation of muscle cell differentiation
GO:0051147	Pak1	regulation of muscle cell differentiation
GO:0051147	Pdcd4	regulation of muscle cell differentiation
GO:0051147	Piezo1	regulation of muscle cell differentiation
GO:0051147	Sik1	regulation of muscle cell differentiation
GO:0051147	Sirt1	regulation of muscle cell differentiation
GO:0051147	Smarcd3	regulation of muscle cell differentiation
GO:0051147	Tarbp2	regulation of muscle cell differentiation
GO:0051147	Tmsb4x	regulation of muscle cell differentiation
GO:0051147	Tomm70a	regulation of muscle cell differentiation
GO:0051147	Trip10	regulation of muscle cell differentiation
GO:0051147	Ybx1	regulation of muscle cell differentiation
GO:0051147	Zbed6	regulation of muscle cell differentiation
GO:0051147	Zeb1	regulation of muscle cell differentiation
GO:0051148	Ankrd17	negative regulation of muscle cell differentiation
GO:0051148	Ctdp1	negative regulation of muscle cell differentiation
GO:0051148	Dnmt1	negative regulation of muscle cell differentiation
GO:0051148	Ezh2	negative regulation of muscle cell differentiation
GO:0051148	Frs2	negative regulation of muscle cell differentiation
GO:0051148	Fzd7	negative regulation of muscle cell differentiation
GO:0051148	Gsk3a	negative regulation of muscle cell differentiation
GO:0051148	Hdac4	negative regulation of muscle cell differentiation
GO:0051148	Hdac5	negative regulation of muscle cell differentiation
GO:0051148	Mecp2	negative regulation of muscle cell differentiation
GO:0051148	Pak1	negative regulation of muscle cell differentiation
GO:0051148	Pdcd4	negative regulation of muscle cell differentiation
GO:0051148	Tomm70a	negative regulation of muscle cell differentiation
GO:0051148	Ybx1	negative regulation of muscle cell differentiation
GO:0051148	Zbed6	negative regulation of muscle cell differentiation
GO:0051149	Actn3	positive regulation of muscle cell differentiation
GO:0051149	Ddx39b	positive regulation of muscle cell differentiation
GO:0051149	Grem1	positive regulation of muscle cell differentiation
GO:0051149	Maml1	positive regulation of muscle cell differentiation
GO:0051149	Mamstr	positive regulation of muscle cell differentiation
GO:0051149	Mapk14	positive regulation of muscle cell differentiation
GO:0051149	Mdm2	positive regulation of muscle cell differentiation
GO:0051149	Nr3c1	positive regulation of muscle cell differentiation
GO:0051149	Piezo1	positive regulation of muscle cell differentiation
GO:0051149	Sirt1	positive regulation of muscle cell differentiation
GO:0051149	Smarcd3	positive regulation of muscle cell differentiation
GO:0051149	Tarbp2	positive regulation of muscle cell differentiation
GO:0051149	Tmsb4x	positive regulation of muscle cell differentiation
GO:0051149	Trip10	positive regulation of muscle cell differentiation
GO:0051150	Ankrd17	regulation of smooth muscle cell differentiation
GO:0051150	Dnmt1	regulation of smooth muscle cell differentiation
GO:0051150	Mecp2	regulation of smooth muscle cell differentiation
GO:0051150	Pdcd4	regulation of smooth muscle cell differentiation
GO:0051150	Sirt1	regulation of smooth muscle cell differentiation
GO:0051150	Smarcd3	regulation of smooth muscle cell differentiation
GO:0051150	Tmsb4x	regulation of smooth muscle cell differentiation
GO:0051150	Zeb1	regulation of smooth muscle cell differentiation
GO:0051151	Ankrd17	negative regulation of smooth muscle cell differentiation
GO:0051151	Dnmt1	negative regulation of smooth muscle cell differentiation
GO:0051151	Mecp2	negative regulation of smooth muscle cell differentiation
GO:0051151	Pdcd4	negative regulation of smooth muscle cell differentiation
GO:0051152	Sirt1	positive regulation of smooth muscle cell differentiation
GO:0051152	Smarcd3	positive regulation of smooth muscle cell differentiation
GO:0051152	Tmsb4x	positive regulation of smooth muscle cell differentiation
GO:0051153	Actn3	regulation of striated muscle cell differentiation
GO:0051153	Ctdp1	regulation of striated muscle cell differentiation
GO:0051153	Ddx39b	regulation of striated muscle cell differentiation
GO:0051153	Ezh2	regulation of striated muscle cell differentiation
GO:0051153	Frs2	regulation of striated muscle cell differentiation
GO:0051153	Fzd7	regulation of striated muscle cell differentiation
GO:0051153	Grem1	regulation of striated muscle cell differentiation
GO:0051153	Gsk3a	regulation of striated muscle cell differentiation
GO:0051153	Hdac4	regulation of striated muscle cell differentiation
GO:0051153	Hdac5	regulation of striated muscle cell differentiation
GO:0051153	Maml1	regulation of striated muscle cell differentiation
GO:0051153	Mamstr	regulation of striated muscle cell differentiation
GO:0051153	Mapk14	regulation of striated muscle cell differentiation
GO:0051153	Naca	regulation of striated muscle cell differentiation
GO:0051153	Nr3c1	regulation of striated muscle cell differentiation
GO:0051153	Pak1	regulation of striated muscle cell differentiation
GO:0051153	Piezo1	regulation of striated muscle cell differentiation
GO:0051153	Sik1	regulation of striated muscle cell differentiation
GO:0051153	Sirt1	regulation of striated muscle cell differentiation
GO:0051153	Tomm70a	regulation of striated muscle cell differentiation
GO:0051153	Trip10	regulation of striated muscle cell differentiation
GO:0051153	Ybx1	regulation of striated muscle cell differentiation
GO:0051154	Ctdp1	negative regulation of striated muscle cell differentiation
GO:0051154	Ezh2	negative regulation of striated muscle cell differentiation
GO:0051154	Frs2	negative regulation of striated muscle cell differentiation
GO:0051154	Fzd7	negative regulation of striated muscle cell differentiation
GO:0051154	Gsk3a	negative regulation of striated muscle cell differentiation
GO:0051154	Hdac4	negative regulation of striated muscle cell differentiation
GO:0051154	Hdac5	negative regulation of striated muscle cell differentiation
GO:0051154	Pak1	negative regulation of striated muscle cell differentiation
GO:0051154	Tomm70a	negative regulation of striated muscle cell differentiation
GO:0051154	Ybx1	negative regulation of striated muscle cell differentiation
GO:0051155	Actn3	positive regulation of striated muscle cell differentiation
GO:0051155	Ddx39b	positive regulation of striated muscle cell differentiation
GO:0051155	Grem1	positive regulation of striated muscle cell differentiation
GO:0051155	Maml1	positive regulation of striated muscle cell differentiation
GO:0051155	Mamstr	positive regulation of striated muscle cell differentiation
GO:0051155	Mapk14	positive regulation of striated muscle cell differentiation
GO:0051155	Nr3c1	positive regulation of striated muscle cell differentiation
GO:0051155	Piezo1	positive regulation of striated muscle cell differentiation
GO:0051155	Sirt1	positive regulation of striated muscle cell differentiation
GO:0051155	Trip10	positive regulation of striated muscle cell differentiation
GO:0051371	Pdlim2	muscle alpha-actinin binding
GO:0051371	Pdlim7	muscle alpha-actinin binding
GO:0051371	Pkd2	muscle alpha-actinin binding
GO:0055001	Actn3	muscle cell development
GO:0055001	Akap13	muscle cell development
GO:0055001	Ank2	muscle cell development
GO:0055001	Atp2a2	muscle cell development
GO:0055001	Bin1	muscle cell development
GO:0055001	Camk2d	muscle cell development
GO:0055001	Capzb	muscle cell development
GO:0055001	Cav2	muscle cell development
GO:0055001	Cfl2	muscle cell development
GO:0055001	Csrp1	muscle cell development
GO:0055001	Ctdp1	muscle cell development
GO:0055001	Ddx39b	muscle cell development
GO:0055001	Flnc	muscle cell development
GO:0055001	Gsk3a	muscle cell development
GO:0055001	Hdac2	muscle cell development
GO:0055001	Hdac4	muscle cell development
GO:0055001	Hdac5	muscle cell development
GO:0055001	Hnrnpu	muscle cell development
GO:0055001	Kdm1a	muscle cell development
GO:0055001	Lmna	muscle cell development
GO:0055001	Lmod1	muscle cell development
GO:0055001	Maml1	muscle cell development
GO:0055001	Map2k4	muscle cell development
GO:0055001	Mef2a	muscle cell development
GO:0055001	Myh10	muscle cell development
GO:0055001	Myof	muscle cell development
GO:0055001	Naca	muscle cell development
GO:0055001	Nfatc4	muscle cell development
GO:0055001	Nr3c1	muscle cell development
GO:0055001	Pak1	muscle cell development
GO:0055001	Pbrm1	muscle cell development
GO:0055001	Pdgfra	muscle cell development
GO:0055001	Pdgfrb	muscle cell development
GO:0055001	Plec	muscle cell development
GO:0055001	Ppp3ca	muscle cell development
GO:0055001	Prkar1a	muscle cell development
GO:0055001	Sirt1	muscle cell development
GO:0055001	Ski	muscle cell development
GO:0055001	Sorbs2	muscle cell development
GO:0055001	Srf	muscle cell development
GO:0055001	Tmod3	muscle cell development
GO:0055001	Tomm70a	muscle cell development
GO:0055001	Tpm1	muscle cell development
GO:0055001	Trip10	muscle cell development
GO:0055002	Akap13	striated muscle cell development
GO:0055002	Cfl2	striated muscle cell development
GO:0055002	Csrp1	striated muscle cell development
GO:0055002	Flnc	striated muscle cell development
GO:0055002	Hdac2	striated muscle cell development
GO:0055002	Lmod1	striated muscle cell development
GO:0055002	Mef2a	striated muscle cell development
GO:0055002	Myh10	striated muscle cell development
GO:0055002	Pdgfra	striated muscle cell development
GO:0055002	Pdgfrb	striated muscle cell development
GO:0055002	Plec	striated muscle cell development
GO:0055002	Prkar1a	striated muscle cell development
GO:0055002	Srf	striated muscle cell development
GO:0055002	Tmod3	striated muscle cell development
GO:0055002	Tpm1	striated muscle cell development
GO:0055007	Akap13	cardiac muscle cell differentiation
GO:0055007	Arid1a	cardiac muscle cell differentiation
GO:0055007	Camk2d	cardiac muscle cell differentiation
GO:0055007	Cby1	cardiac muscle cell differentiation
GO:0055007	Ctdp1	cardiac muscle cell differentiation
GO:0055007	Ddx39b	cardiac muscle cell differentiation
GO:0055007	Frs2	cardiac muscle cell differentiation
GO:0055007	Fzd7	cardiac muscle cell differentiation
GO:0055007	Grem1	cardiac muscle cell differentiation
GO:0055007	Gsk3a	cardiac muscle cell differentiation
GO:0055007	Hdac2	cardiac muscle cell differentiation
GO:0055007	Hnrnpu	cardiac muscle cell differentiation
GO:0055007	Lmna	cardiac muscle cell differentiation
GO:0055007	Maml1	cardiac muscle cell differentiation
GO:0055007	Map2k4	cardiac muscle cell differentiation
GO:0055007	Mef2a	cardiac muscle cell differentiation
GO:0055007	Myh10	cardiac muscle cell differentiation
GO:0055007	Nr3c1	cardiac muscle cell differentiation
GO:0055007	Pak1	cardiac muscle cell differentiation
GO:0055007	Pdgfra	cardiac muscle cell differentiation
GO:0055007	Pdgfrb	cardiac muscle cell differentiation
GO:0055007	Plec	cardiac muscle cell differentiation
GO:0055007	Rxra	cardiac muscle cell differentiation
GO:0055007	Sik1	cardiac muscle cell differentiation
GO:0055007	Sirt1	cardiac muscle cell differentiation
GO:0055007	Slc9a1	cardiac muscle cell differentiation
GO:0055007	Sorbs2	cardiac muscle cell differentiation
GO:0055007	Srf	cardiac muscle cell differentiation
GO:0055007	Tomm70a	cardiac muscle cell differentiation
GO:0055007	Trip10	cardiac muscle cell differentiation
GO:0055007	Tsc1	cardiac muscle cell differentiation
GO:0055008	Ctnnb1	cardiac muscle tissue morphogenesis
GO:0055008	Egln1	cardiac muscle tissue morphogenesis
GO:0055008	Fkbp1a	cardiac muscle tissue morphogenesis
GO:0055008	Foxc2	cardiac muscle tissue morphogenesis
GO:0055008	Lrp6	cardiac muscle tissue morphogenesis
GO:0055008	Med1	cardiac muscle tissue morphogenesis
GO:0055008	Rxra	cardiac muscle tissue morphogenesis
GO:0055008	S1pr1	cardiac muscle tissue morphogenesis
GO:0055008	Tpm1	cardiac muscle tissue morphogenesis
GO:0055008	Ube4b	cardiac muscle tissue morphogenesis
GO:0055008	Xirp2	cardiac muscle tissue morphogenesis
GO:0055008	Zfpm2	cardiac muscle tissue morphogenesis
GO:0055010	Ctnnb1	ventricular cardiac muscle tissue morphogenesis
GO:0055010	Fkbp1a	ventricular cardiac muscle tissue morphogenesis
GO:0055010	Foxc2	ventricular cardiac muscle tissue morphogenesis
GO:0055010	Med1	ventricular cardiac muscle tissue morphogenesis
GO:0055010	Rxra	ventricular cardiac muscle tissue morphogenesis
GO:0055010	Tpm1	ventricular cardiac muscle tissue morphogenesis
GO:0055010	Ube4b	ventricular cardiac muscle tissue morphogenesis
GO:0055010	Zfpm2	ventricular cardiac muscle tissue morphogenesis
GO:0055012	Lmna	ventricular cardiac muscle cell differentiation
GO:0055012	Mef2a	ventricular cardiac muscle cell differentiation
GO:0055012	Myh10	ventricular cardiac muscle cell differentiation
GO:0055012	Rxra	ventricular cardiac muscle cell differentiation
GO:0055013	Akap13	cardiac muscle cell development
GO:0055013	Camk2d	cardiac muscle cell development
GO:0055013	Ctdp1	cardiac muscle cell development
GO:0055013	Ddx39b	cardiac muscle cell development
GO:0055013	Gsk3a	cardiac muscle cell development
GO:0055013	Hdac2	cardiac muscle cell development
GO:0055013	Hnrnpu	cardiac muscle cell development
GO:0055013	Lmna	cardiac muscle cell development
GO:0055013	Maml1	cardiac muscle cell development
GO:0055013	Map2k4	cardiac muscle cell development
GO:0055013	Mef2a	cardiac muscle cell development
GO:0055013	Myh10	cardiac muscle cell development
GO:0055013	Nr3c1	cardiac muscle cell development
GO:0055013	Pak1	cardiac muscle cell development
GO:0055013	Pdgfra	cardiac muscle cell development
GO:0055013	Pdgfrb	cardiac muscle cell development
GO:0055013	Plec	cardiac muscle cell development
GO:0055013	Sirt1	cardiac muscle cell development
GO:0055013	Sorbs2	cardiac muscle cell development
GO:0055013	Srf	cardiac muscle cell development
GO:0055013	Tomm70a	cardiac muscle cell development
GO:0055013	Trip10	cardiac muscle cell development
GO:0055015	Lmna	ventricular cardiac muscle cell development
GO:0055015	Mef2a	ventricular cardiac muscle cell development
GO:0055015	Myh10	ventricular cardiac muscle cell development
GO:0055017	Akap13	cardiac muscle tissue growth
GO:0055017	Apc	cardiac muscle tissue growth
GO:0055017	Arid2	cardiac muscle tissue growth
GO:0055017	Camk2d	cardiac muscle tissue growth
GO:0055017	Cdk1	cardiac muscle tissue growth
GO:0055017	Ctdp1	cardiac muscle tissue growth
GO:0055017	Ctnnb1	cardiac muscle tissue growth
GO:0055017	Ddx39b	cardiac muscle tissue growth
GO:0055017	Foxc2	cardiac muscle tissue growth
GO:0055017	Gsk3a	cardiac muscle tissue growth
GO:0055017	Hdac2	cardiac muscle tissue growth
GO:0055017	Map2k4	cardiac muscle tissue growth
GO:0055017	Mapk1	cardiac muscle tissue growth
GO:0055017	Mapk14	cardiac muscle tissue growth
GO:0055017	Meis1	cardiac muscle tissue growth
GO:0055017	Ncam1	cardiac muscle tissue growth
GO:0055017	Nr3c1	cardiac muscle tissue growth
GO:0055017	Pak1	cardiac muscle tissue growth
GO:0055017	Prkar1a	cardiac muscle tissue growth
GO:0055017	Rxra	cardiac muscle tissue growth
GO:0055017	S1pr1	cardiac muscle tissue growth
GO:0055017	Sirt1	cardiac muscle tissue growth
GO:0055017	Sorbs2	cardiac muscle tissue growth
GO:0055017	Tomm70a	cardiac muscle tissue growth
GO:0055017	Trip10	cardiac muscle tissue growth
GO:0055017	Yap1	cardiac muscle tissue growth
GO:0055017	Zfpm2	cardiac muscle tissue growth
GO:0055021	Apc	regulation of cardiac muscle tissue growth
GO:0055021	Cdk1	regulation of cardiac muscle tissue growth
GO:0055021	Ctdp1	regulation of cardiac muscle tissue growth
GO:0055021	Ddx39b	regulation of cardiac muscle tissue growth
GO:0055021	Gsk3a	regulation of cardiac muscle tissue growth
GO:0055021	Hdac2	regulation of cardiac muscle tissue growth
GO:0055021	Mapk1	regulation of cardiac muscle tissue growth
GO:0055021	Mapk14	regulation of cardiac muscle tissue growth
GO:0055021	Meis1	regulation of cardiac muscle tissue growth
GO:0055021	Ncam1	regulation of cardiac muscle tissue growth
GO:0055021	Nr3c1	regulation of cardiac muscle tissue growth
GO:0055021	Pak1	regulation of cardiac muscle tissue growth
GO:0055021	Sirt1	regulation of cardiac muscle tissue growth
GO:0055021	Tomm70a	regulation of cardiac muscle tissue growth
GO:0055021	Trip10	regulation of cardiac muscle tissue growth
GO:0055021	Yap1	regulation of cardiac muscle tissue growth
GO:0055021	Zfpm2	regulation of cardiac muscle tissue growth
GO:0055022	Apc	negative regulation of cardiac muscle tissue growth
GO:0055022	Ctdp1	negative regulation of cardiac muscle tissue growth
GO:0055022	Gsk3a	negative regulation of cardiac muscle tissue growth
GO:0055022	Hdac2	negative regulation of cardiac muscle tissue growth
GO:0055022	Meis1	negative regulation of cardiac muscle tissue growth
GO:0055022	Pak1	negative regulation of cardiac muscle tissue growth
GO:0055022	Tomm70a	negative regulation of cardiac muscle tissue growth
GO:0055023	Cdk1	positive regulation of cardiac muscle tissue growth
GO:0055023	Ddx39b	positive regulation of cardiac muscle tissue growth
GO:0055023	Mapk1	positive regulation of cardiac muscle tissue growth
GO:0055023	Mapk14	positive regulation of cardiac muscle tissue growth
GO:0055023	Ncam1	positive regulation of cardiac muscle tissue growth
GO:0055023	Nr3c1	positive regulation of cardiac muscle tissue growth
GO:0055023	Sirt1	positive regulation of cardiac muscle tissue growth
GO:0055023	Trip10	positive regulation of cardiac muscle tissue growth
GO:0055023	Yap1	positive regulation of cardiac muscle tissue growth
GO:0055023	Zfpm2	positive regulation of cardiac muscle tissue growth
GO:0055117	Ank2	regulation of cardiac muscle contraction
GO:0055117	Atp2a2	regulation of cardiac muscle contraction
GO:0055117	Bin1	regulation of cardiac muscle contraction
GO:0055117	Cacna1h	regulation of cardiac muscle contraction
GO:0055117	Calm1	regulation of cardiac muscle contraction
GO:0055117	Cav1	regulation of cardiac muscle contraction
GO:0055117	Dlg1	regulation of cardiac muscle contraction
GO:0055117	Hdac4	regulation of cardiac muscle contraction
GO:0055117	Slc9a1	regulation of cardiac muscle contraction
GO:0055117	Sumo1	regulation of cardiac muscle contraction
GO:0055117	Trpm4	regulation of cardiac muscle contraction
GO:0055118	Bin1	negative regulation of cardiac muscle contraction
GO:0055119	Atp2a2	relaxation of cardiac muscle
GO:0055119	Camk2d	relaxation of cardiac muscle
GO:0055119	Camk2g	relaxation of cardiac muscle
GO:0060038	Apc	cardiac muscle cell proliferation
GO:0060038	Arid2	cardiac muscle cell proliferation
GO:0060038	Cdk1	cardiac muscle cell proliferation
GO:0060038	Ctnnb1	cardiac muscle cell proliferation
GO:0060038	Foxc2	cardiac muscle cell proliferation
GO:0060038	Hdac2	cardiac muscle cell proliferation
GO:0060038	Mapk1	cardiac muscle cell proliferation
GO:0060038	Mapk14	cardiac muscle cell proliferation
GO:0060038	Meis1	cardiac muscle cell proliferation
GO:0060038	Ncam1	cardiac muscle cell proliferation
GO:0060038	Prkar1a	cardiac muscle cell proliferation
GO:0060038	Rxra	cardiac muscle cell proliferation
GO:0060038	Yap1	cardiac muscle cell proliferation
GO:0060038	Zfpm2	cardiac muscle cell proliferation
GO:0060043	Apc	regulation of cardiac muscle cell proliferation
GO:0060043	Cdk1	regulation of cardiac muscle cell proliferation
GO:0060043	Hdac2	regulation of cardiac muscle cell proliferation
GO:0060043	Mapk1	regulation of cardiac muscle cell proliferation
GO:0060043	Mapk14	regulation of cardiac muscle cell proliferation
GO:0060043	Meis1	regulation of cardiac muscle cell proliferation
GO:0060043	Ncam1	regulation of cardiac muscle cell proliferation
GO:0060043	Yap1	regulation of cardiac muscle cell proliferation
GO:0060043	Zfpm2	regulation of cardiac muscle cell proliferation
GO:0060044	Apc	negative regulation of cardiac muscle cell proliferation
GO:0060044	Hdac2	negative regulation of cardiac muscle cell proliferation
GO:0060044	Meis1	negative regulation of cardiac muscle cell proliferation
GO:0060045	Cdk1	positive regulation of cardiac muscle cell proliferation
GO:0060045	Mapk1	positive regulation of cardiac muscle cell proliferation
GO:0060045	Mapk14	positive regulation of cardiac muscle cell proliferation
GO:0060045	Ncam1	positive regulation of cardiac muscle cell proliferation
GO:0060045	Yap1	positive regulation of cardiac muscle cell proliferation
GO:0060045	Zfpm2	positive regulation of cardiac muscle cell proliferation
GO:0060048	Ank2	cardiac muscle contraction
GO:0060048	Atp2a2	cardiac muscle contraction
GO:0060048	Bin1	cardiac muscle contraction
GO:0060048	Cacna1h	cardiac muscle contraction
GO:0060048	Calm1	cardiac muscle contraction
GO:0060048	Camk2d	cardiac muscle contraction
GO:0060048	Cav1	cardiac muscle contraction
GO:0060048	Dlg1	cardiac muscle contraction
GO:0060048	Flna	cardiac muscle contraction
GO:0060048	Hdac4	cardiac muscle contraction
GO:0060048	Map2k6	cardiac muscle contraction
GO:0060048	Nup155	cardiac muscle contraction
GO:0060048	Ppp1r13l	cardiac muscle contraction
GO:0060048	Slc9a1	cardiac muscle contraction
GO:0060048	Srsf1	cardiac muscle contraction
GO:0060048	Sumo1	cardiac muscle contraction
GO:0060048	Tpm1	cardiac muscle contraction
GO:0060048	Trpm4	cardiac muscle contraction
GO:0060307	Ank2	regulation of ventricular cardiac muscle cell membrane repolarization
GO:0060372	Flna	regulation of atrial cardiac muscle cell membrane repolarization
GO:0060414	Mylk	aorta smooth muscle tissue morphogenesis
GO:0060415	Ctnnb1	muscle tissue morphogenesis
GO:0060415	Egln1	muscle tissue morphogenesis
GO:0060415	Fkbp1a	muscle tissue morphogenesis
GO:0060415	Foxc2	muscle tissue morphogenesis
GO:0060415	Lrp6	muscle tissue morphogenesis
GO:0060415	Med1	muscle tissue morphogenesis
GO:0060415	Mylk	muscle tissue morphogenesis
GO:0060415	Rxra	muscle tissue morphogenesis
GO:0060415	S1pr1	muscle tissue morphogenesis
GO:0060415	Tpm1	muscle tissue morphogenesis
GO:0060415	Ube4b	muscle tissue morphogenesis
GO:0060415	Xirp2	muscle tissue morphogenesis
GO:0060415	Zfpm2	muscle tissue morphogenesis
GO:0060537	Actn3	muscle tissue development
GO:0060537	Ahr	muscle tissue development
GO:0060537	Akap13	muscle tissue development
GO:0060537	Apc	muscle tissue development
GO:0060537	Arid1a	muscle tissue development
GO:0060537	Arid2	muscle tissue development
GO:0060537	Bcl9	muscle tissue development
GO:0060537	Bcl9l	muscle tissue development
GO:0060537	Camk2d	muscle tissue development
GO:0060537	Casp8	muscle tissue development
GO:0060537	Cav1	muscle tissue development
GO:0060537	Cav2	muscle tissue development
GO:0060537	Cby1	muscle tissue development
GO:0060537	Ccnt2	muscle tissue development
GO:0060537	Cdk1	muscle tissue development
GO:0060537	Cfl2	muscle tissue development
GO:0060537	Csrp1	muscle tissue development
GO:0060537	Ctdp1	muscle tissue development
GO:0060537	Ctnnb1	muscle tissue development
GO:0060537	Ddx39b	muscle tissue development
GO:0060537	Dlg1	muscle tissue development
GO:0060537	Egln1	muscle tissue development
GO:0060537	Emd	muscle tissue development
GO:0060537	Ep300	muscle tissue development
GO:0060537	Fkbp1a	muscle tissue development
GO:0060537	Flcn	muscle tissue development
GO:0060537	Flnb	muscle tissue development
GO:0060537	Foxc2	muscle tissue development
GO:0060537	Frs2	muscle tissue development
GO:0060537	Fzd7	muscle tissue development
GO:0060537	Grem1	muscle tissue development
GO:0060537	Gsk3a	muscle tissue development
GO:0060537	Hdac2	muscle tissue development
GO:0060537	Hdac4	muscle tissue development
GO:0060537	Hdac5	muscle tissue development
GO:0060537	Hdac6	muscle tissue development
GO:0060537	Hdac7	muscle tissue development
GO:0060537	Hmgcr	muscle tissue development
GO:0060537	Hnrnpu	muscle tissue development
GO:0060537	Lemd2	muscle tissue development
GO:0060537	Lemd3	muscle tissue development
GO:0060537	Lmna	muscle tissue development
GO:0060537	Lrp6	muscle tissue development
GO:0060537	Maml1	muscle tissue development
GO:0060537	Map2k4	muscle tissue development
GO:0060537	Mapk1	muscle tissue development
GO:0060537	Mapk14	muscle tissue development
GO:0060537	Med1	muscle tissue development
GO:0060537	Mef2a	muscle tissue development
GO:0060537	Mef2d	muscle tissue development
GO:0060537	Meis1	muscle tissue development
GO:0060537	Myh10	muscle tissue development
GO:0060537	Mylk	muscle tissue development
GO:0060537	Naca	muscle tissue development
GO:0060537	Ncam1	muscle tissue development
GO:0060537	Nf1	muscle tissue development
[truncated: 546 more rows]
