# Supplementary material for: Phosphoproteomic mapping reveals distinct signaling actions and activation of muscle protein synthesis by Isthmin-1
Source: eLife. 2022 Sep 28;11:e80014. doi: 10.7554/eLife.80014 (PMC9592085; doi:10.7554/eLife.80014)
Supplement: Figure 2—source data 1. [file elife-80014-fig2-data1.xlsx]

## Sheet: Enriched pathways by ISM1vsBSA
GO ID	GO Term	Annotated	Significant	Expected	Rank in classicFisher	classicFisher	classicKS	elimKS	KSnumeric	Enrichment score
GO:0006900	vesicle budding from membrane	16	8	0.7	2	2.3e-08	4.9e-05	0.07494	4.9e-05	11.4286
GO:0071479	cellular response to ionizing radiation	13	6	0.57	5	2.6e-06	0.00081	0.10625	0.00081	10.5263
GO:0010324	membrane invagination	13	5	0.57	12	5.5e-05	0.00025	0.52486	0.00025	8.77193
GO:0045945	positive regulation of transcription by RNA polymerase III	11	4	0.48	21	0.00042	0.00906	0.69814	0.00906	8.33333
GO:0007422	peripheral nervous system development	12	4	0.52	239	0.03513	3.7e-05	0.01223	3.7e-05	7.69231
GO:0006359	regulation of transcription by RNA polymerase III	12	4	0.52	1812	1	0.00419	0.53873	0.00419	7.69231
GO:0030330	DNA damage response, signal transduction by p53 class mediator	12	4	0.52	25	0.00061	0.00661	0.10502	0.00661	7.69231
GO:0006356	regulation of transcription by RNA polymerase I	10	3	0.44	78	0.00442	0.00061	0.57022	0.00061	6.81818
GO:0060038	cardiac muscle cell proliferation	14	4	0.61	36	0.00117	2.2e-05	0.0922	2.2e-05	6.55738
GO:0045669	positive regulation of osteoblast differentiation	14	4	0.61	37	0.00117	0.00966	0.41053	0.00966	6.55738
GO:0000245	spliceosomal complex assembly	21	6	0.92	76	0.00427	0.00033	0.15574	0.00033	6.52174
GO:0061640	cytoskeleton-dependent cytokinesis	25	7	1.09	28	0.00078	5.8e-06	0.31661	5.8e-06	6.42202
GO:0014031	mesenchymal cell development	11	3	0.48	1511	1	2.8e-05	1	2.8e-05	6.25
GO:0014032	neural crest cell development	11	3	0.48	91	0.00592	2.8e-05	0.00449	2.8e-05	6.25
GO:0014037	Schwann cell differentiation	11	3	0.48	92	0.00592	0.00013	0.0222	0.00013	6.25
GO:0046434	organophosphate catabolic process	11	3	0.48	93	0.00592	0.00019	0.00831	0.00019	6.25
GO:0033144	negative regulation of intracellular steroid hormone receptor signaling pathway	11	3	0.48	94	0.00592	0.00251	0.03218	0.00251	6.25
GO:0007062	sister chromatid cohesion	11	3	0.48	95	0.00592	0.00508	0.18175	0.00508	6.25
GO:0048013	ephrin receptor signaling pathway	11	3	0.48	96	0.00592	0.00572	0.389	0.00572	6.25
GO:0051567	histone H3-K9 methylation	11	3	0.48	1860	1	0.00655	0.80741	0.00655	6.25
GO:0120034	positive regulation of plasma membrane bounded cell projection assembly	26	7	1.13	9	2.4e-05	0.00022	0.42727	0.00022	6.19469
GO:0051489	regulation of filopodium assembly	15	4	0.65	47	0.00156	0.00107	0.00957	0.00107	6.15385
GO:0010212	response to ionizing radiation	27	7	1.18	1035	0.3899	0.00013	0.03404	0.00013	5.9322
GO:0106106	cold-induced thermogenesis	27	7	1.18	1732	1	0.00176	0.36782	0.00176	5.9322
GO:0120161	regulation of cold-induced thermogenesis	27	7	1.18	1733	1	0.00176	0.36782	0.00176	5.9322
GO:0002064	epithelial cell development	39	10	1.7	3	1.4e-07	1.5e-05	0.80865	1.5e-05	5.88235
GO:0048864	stem cell development	12	3	0.52	1474	1	6.6e-06	0.58174	6.6e-06	5.76923
GO:0034394	protein localization to cell surface	12	3	0.52	112	0.00769	4.1e-05	0.74438	4.1e-05	5.76923
GO:0016073	snRNA metabolic process	12	3	0.52	113	0.00769	0.00696	0.12527	0.00696	5.76923
GO:0036465	synaptic vesicle recycling	20	5	0.87	401	0.06878	0.00314	0.57315	0.00314	5.74713
GO:1990845	adaptive thermogenesis	28	7	1.22	1757	1	0.00237	0.43146	0.00237	5.7377
GO:0002065	columnar/cuboidal epithelial cell differentiation	16	4	0.7	54	0.00202	0.00836	0.05341	0.00836	5.71429
GO:0001659	temperature homeostasis	29	7	1.27	1604	1	0.00031	0.5589	0.00031	5.51181
GO:0046390	ribose phosphate biosynthetic process	25	6	1.09	395	0.06852	0.00021	0.04904	0.00021	5.50459
GO:0014855	striated muscle cell proliferation	17	4	0.74	1534	1	5.2e-05	0.08424	5.2e-05	5.40541
GO:0001824	blastocyst development	34	8	1.48	19	0.0003	0.00076	0.58382	0.00076	5.40541
GO:0033077	T cell differentiation in thymus	17	4	0.74	58	0.00257	0.00137	0.43418	0.00137	5.40541
GO:0072583	clathrin-dependent endocytosis	17	4	0.74	59	0.00257	0.0026	0.36215	0.0026	5.40541
GO:0009913	epidermal cell differentiation	30	7	1.31	63	0.00304	0.00043	0.35494	0.00043	5.34351
GO:0007009	plasma membrane organization	30	7	1.31	22	0.00052	0.00199	0.68969	0.00199	5.34351
GO:0014033	neural crest cell differentiation	13	3	0.57	1503	1	2.3e-05	0.4882	2.3e-05	5.26316
GO:0021955	central nervous system neuron axonogenesis	13	3	0.57	127	0.00974	0.00774	0.91796	0.00774	5.26316
GO:0055017	cardiac muscle tissue growth	27	6	1.18	1478	1	8.1e-06	0.07196	8.1e-06	5.08475
GO:0046847	filopodium assembly	18	4	0.79	1645	1	0.00057	0.35775	0.00057	5.06329
GO:0048488	synaptic vesicle endocytosis	18	4	0.79	66	0.00321	0.00185	0.656	0.00185	5.06329
GO:0140238	presynaptic endocytosis	18	4	0.79	1735	1	0.00185	0.656	0.00185	5.06329
GO:0030865	cortical cytoskeleton organization	18	4	0.79	1761	1	0.00247	0.45185	0.00247	5.06329
GO:1903038	negative regulation of leukocyte cell-cell adhesion	18	4	0.79	409	0.06908	0.00825	0.86067	0.00825	5.06329
GO:0009260	ribonucleotide biosynthetic process	23	5	1	403	0.06882	0.0003	0.09419	0.0003	5
GO:0033143	regulation of intracellular steroid hormone receptor signaling pathway	23	5	1	1787	1	0.00295	0.36265	0.00295	5
GO:0060419	heart growth	28	6	1.22	1455	1	3e-06	0.06693	3e-06	4.91803
GO:0008344	adult locomotory behavior	14	3	0.61	139	0.01207	0.00037	0.2783	0.00037	4.91803
GO:0090312	positive regulation of protein deacetylation	14	3	0.61	243	0.0353	0.00058	0.12951	0.00058	4.91803
GO:0046627	negative regulation of insulin receptor signaling pathway	14	3	0.61	140	0.01207	0.00372	0.36763	0.00372	4.91803
GO:1900077	negative regulation of cellular response to insulin stimulus	14	3	0.61	1804	1	0.00372	0.36763	0.00372	4.91803
GO:0000281	mitotic cytokinesis	19	4	0.83	73	0.00396	0.00141	0.41365	0.00141	4.81928
GO:0031113	regulation of microtubule polymerization	19	4	0.83	723	0.22156	0.00544	0.52093	0.00544	4.81928
GO:0008544	epidermis development	53	11	2.31	192	0.02198	2e-05	0.51759	2e-05	4.7619
GO:0006164	purine nucleotide biosynthetic process	24	5	1.05	525	0.10143	0.00253	0.11895	0.00253	4.7619
GO:0032272	negative regulation of protein polymerization	24	5	1.05	526	0.10143	0.00535	0.04054	0.00535	4.7619
GO:0009165	nucleotide biosynthetic process	29	6	1.27	1562	1	0.0001	0.0287	0.0001	4.72441
GO:1901293	nucleoside phosphate biosynthetic process	29	6	1.27	1563	1	0.0001	0.0287	0.0001	4.72441
GO:0000910	cytokinesis	44	9	1.92	1483	1	9.5e-06	0.47259	9.5e-06	4.6875
GO:0120032	regulation of plasma membrane bounded cell projection assembly	44	9	1.92	1568	1	0.00012	0.73058	0.00012	4.6875
GO:0006360	transcription by RNA polymerase I	15	3	0.65	1664	1	0.00077	0.35955	0.00077	4.61538
GO:0009141	nucleoside triphosphate metabolic process	15	3	0.65	1683	1	0.00103	0.22169	0.00103	4.61538
GO:0008366	axon ensheathment	25	5	1.09	1537	1	5.7e-05	0.19652	5.7e-05	4.58716
GO:0042552	myelination	25	5	1.09	51	0.00161	5.7e-05	0.19652	5.7e-05	4.58716
GO:0007272	ensheathment of neurons	25	5	1.09	1538	1	5.7e-05	0.19652	5.7e-05	4.58716
GO:0072522	purine-containing compound biosynthetic process	25	5	1.09	1680	1	0.00101	0.07612	0.00101	4.58716
GO:0090504	epiboly	10	2	0.44	1594	1	0.00026	0.30793	0.00026	4.54545
GO:0090505	epiboly involved in wound healing	10	2	0.44	1595	1	0.00026	0.30793	0.00026	4.54545
GO:0044319	wound healing, spreading of cells	10	2	0.44	282	0.04692	0.00026	0.30793	0.00026	4.54545
GO:2001259	positive regulation of cation channel activity	10	2	0.44	283	0.04692	0.00169	0.10037	0.00169	4.54545
GO:0090162	establishment of epithelial cell polarity	10	2	0.44	284	0.04692	0.00408	0.53543	0.00408	4.54545
GO:0060421	positive regulation of heart growth	10	2	0.44	1842	1	0.00582	0.11451	0.00582	4.54545
GO:0055023	positive regulation of cardiac muscle tissue growth	10	2	0.44	285	0.04692	0.00582	0.11451	0.00582	4.54545
GO:1902305	regulation of sodium ion transmembrane transport	10	2	0.44	1843	1	0.00583	0.2229	0.00583	4.54545
GO:2000649	regulation of sodium ion transmembrane transporter activity	10	2	0.44	286	0.04692	0.00583	0.2229	0.00583	4.54545
GO:0097320	plasma membrane tubulation	10	2	0.44	287	0.04692	0.00762	0.81969	0.00762	4.54545
GO:0043409	negative regulation of MAPK cascade	36	7	1.57	107	0.00738	0.00038	0.18417	0.00038	4.4586
GO:0022408	negative regulation of cell-cell adhesion	26	5	1.13	750	0.24813	0.00335	0.74027	0.00335	4.42478
GO:0003231	cardiac ventricle development	26	5	1.13	1886	1	0.00802	0.29869	0.00802	4.42478
GO:0104004	cellular response to environmental stimulus	52	10	2.27	1641	1	0.00053	0.06946	0.00053	4.40529
GO:0071214	cellular response to abiotic stimulus	52	10	2.27	1033	0.38676	0.00053	0.06946	0.00053	4.40529
GO:0048871	multicellular organismal homeostasis	73	14	3.18	15	0.00015	2.2e-09	0.45207	2.2e-09	4.40252
GO:0006470	protein dephosphorylation	47	9	2.05	7	6.8e-06	0.00015	0.18329	0.00015	4.39024
GO:0060491	regulation of cell projection assembly	47	9	2.05	1590	1	0.00022	0.65257	0.00022	4.39024
GO:0008037	cell recognition	21	4	0.92	870	0.32537	0.00034	0.31425	0.00034	4.34783
GO:0009152	purine ribonucleotide biosynthetic process	21	4	0.92	89	0.00578	0.00214	0.20327	0.00214	4.34783
GO:0030837	negative regulation of actin filament polymerization	21	4	0.92	651	0.16389	0.0062	0.10081	0.0062	4.34783
GO:0060997	dendritic spine morphogenesis	16	3	0.7	105	0.00716	0.00061	0.91259	0.00061	4.28571
GO:0030534	adult behavior	16	3	0.7	1655	1	0.00068	0.2623	0.00068	4.28571
GO:0016572	histone phosphorylation	16	3	0.7	170	0.01762	0.00074	0.0297	0.00074	4.28571
GO:0061951	establishment of protein localization to plasma membrane	16	3	0.7	655	0.16448	0.00279	0.36735	0.00279	4.28571
GO:0043401	steroid hormone mediated signaling pathway	32	6	1.4	237	0.03491	0.00346	0.50049	0.00346	4.28571
GO:0032232	negative regulation of actin filament bundle assembly	16	3	0.7	1810	1	0.0041	0.11236	0.0041	4.28571
GO:0042471	ear morphogenesis	16	3	0.7	656	0.16448	0.00961	0.21697	0.00961	4.28571
GO:0060485	mesenchyme development	54	10	2.36	269	0.04439	4.8e-10	0.33779	4.8e-10	4.23729
GO:2001242	regulation of intrinsic apoptotic signaling pathway	38	7	1.66	1744	1	0.00196	0.31421	0.00196	4.21687
GO:0030855	epithelial cell differentiation	104	19	4.54	626	0.15287	7.8e-07	0.7312	7.8e-07	4.18502
GO:0048762	mesenchymal cell differentiation	44	8	1.92	1378	1	1.9e-09	0.46973	1.9e-09	4.16667
GO:0010717	regulation of epithelial to mesenchymal transition	22	4	0.96	100	0.00687	6.2e-06	0.00281	6.2e-06	4.16667
GO:0045070	positive regulation of viral genome replication	11	2	0.48	320	0.05603	0.00033	0.73842	0.00033	4.16667
GO:0034767	positive regulation of ion transmembrane transport	22	4	0.96	410	0.06912	0.00047	0.58066	0.00047	4.16667
GO:0043062	extracellular structure organization	33	6	1.44	1708	1	0.00138	0.3734	0.00138	4.16667
GO:0045229	external encapsulating structure organization	33	6	1.44	1709	1	0.00138	0.3734	0.00138	4.16667
GO:0030198	extracellular matrix organization	33	6	1.44	33	0.00093	0.00138	0.3734	0.00138	4.16667
GO:0035019	somatic stem cell population maintenance	11	2	0.48	321	0.05603	0.00172	0.04732	0.00172	4.16667
GO:0046622	positive regulation of organ growth	11	2	0.48	1756	1	0.0023	0.11472	0.0023	4.16667
GO:0043588	skin development	44	8	1.92	41	0.00133	0.00232	0.63964	0.00232	4.16667
GO:0043001	Golgi to plasma membrane protein transport	11	2	0.48	322	0.05603	0.00387	0.19106	0.00387	4.16667
GO:0003013	circulatory system process	67	12	2.92	1533	1	5.1e-05	0.76838	5.1e-05	4.10959
GO:0016311	dephosphorylation	56	10	2.44	514	0.09963	0.0005	0.25601	0.0005	4.09836
GO:0007411	axon guidance	28	5	1.22	61	0.00273	0.00276	0.38297	0.00276	4.09836
GO:0097485	neuron projection guidance	28	5	1.22	1779	1	0.00276	0.38297	0.00276	4.09836
GO:0030856	regulation of epithelial cell differentiation	28	5	1.22	62	0.00273	0.00314	0.34559	0.00314	4.09836
GO:0003018	vascular process in circulatory system	28	5	1.22	1877	1	0.00747	0.69765	0.00747	4.09836
GO:0140546	defense response to symbiont	45	8	1.96	1489	1	1.1e-05	0.42979	1.1e-05	4.08163
GO:0051607	defense response to virus	45	8	1.96	70	0.00356	1.1e-05	0.42979	1.1e-05	4.08163
GO:0048193	Golgi vesicle transport	62	11	2.7	85	0.00526	5.6e-06	0.05052	5.6e-06	4.07407
GO:0031507	heterochromatin assembly	34	6	1.48	24	0.0006	3e-05	0.35796	3e-05	4.05405
GO:0045814	negative regulation of gene expression, epigenetic	34	6	1.48	1515	1	3e-05	0.35796	3e-05	4.05405
GO:0031497	chromatin assembly	51	9	2.22	1561	1	0.0001	0.16033	0.0001	4.05405
GO:1902904	negative regulation of supramolecular fiber organization	51	9	2.22	1566	1	0.00011	0.3634	0.00011	4.05405
GO:0007019	microtubule depolymerization	17	3	0.74	413	0.06939	0.00031	0.18952	0.00031	4.05405
GO:0051653	spindle localization	17	3	0.74	244	0.03532	0.0005	0.8318	0.0005	4.05405
GO:0070972	protein localization to endoplasmic reticulum	17	3	0.74	181	0.02085	0.00066	0.20559	0.00066	4.05405
GO:0031122	cytoplasmic microtubule organization	17	3	0.74	182	0.02085	0.00089	0.32779	0.00089	4.05405
GO:0055021	regulation of cardiac muscle tissue growth	17	3	0.74	728	0.22243	0.00141	0.21383	0.00141	4.05405
GO:0046718	viral entry into host cell	17	3	0.74	183	0.02085	0.00143	0.11231	0.00143	4.05405
GO:0031111	negative regulation of microtubule polymerization or depolymerization	17	3	0.74	534	0.10224	0.00195	0.5139	0.00195	4.05405
GO:0007229	integrin-mediated signaling pathway	17	3	0.74	184	0.02085	0.00688	0.96873	0.00688	4.05405
GO:0002761	regulation of myeloid leukocyte differentiation	23	4	1	871	0.32546	0.00207	0.2353	0.00207	4
GO:0002440	production of molecular mediator of immune response	23	4	1	1888	1	0.00819	0.33435	0.00819	4
GO:0051494	negative regulation of cytoskeleton organization	52	9	2.27	1494	1	1.6e-05	0.43256	1.6e-05	3.96476
GO:0031060	regulation of histone methylation	29	5	1.27	404	0.06888	0.00263	0.92914	0.00263	3.93701
GO:0072331	signal transduction by p53 class mediator	29	5	1.27	1825	1	0.00471	0.02384	0.00471	3.93701
GO:0001649	osteoblast differentiation	35	6	1.53	779	0.27367	0.00016	0.42581	0.00016	3.92157
GO:0007600	sensory perception	35	6	1.53	805	0.29901	0.00056	0.11545	0.00056	3.92157
GO:0009755	hormone-mediated signaling pathway	35	6	1.53	1722	1	0.00156	0.41206	0.00156	3.92157
GO:0042113	B cell activation	35	6	1.53	647	0.16281	0.00639	0.53042	0.00639	3.92157
GO:0016575	histone deacetylation	41	7	1.79	245	0.03535	1.5e-05	0.00922	1.5e-05	3.91061
GO:0048738	cardiac muscle tissue development	53	9	2.31	1470	1	5.4e-06	0.45991	5.4e-06	3.8961
GO:0008015	blood circulation	59	10	2.57	1580	1	0.00017	0.77546	0.00017	3.89105
GO:0009636	response to toxic substance	12	2	0.52	362	0.0657	8.2e-05	0.01161	8.2e-05	3.84615
GO:0048844	artery morphogenesis	12	2	0.52	363	0.0657	0.00113	0.26118	0.00113	3.84615
GO:0045665	negative regulation of neuron differentiation	12	2	0.52	364	0.0657	0.00492	0.05301	0.00492	3.84615
GO:0002831	regulation of response to biotic stimulus	48	8	2.09	1799	1	0.00357	0.26924	0.00357	3.82775
GO:0051261	protein depolymerization	42	7	1.83	517	0.1008	0.00121	0.16926	0.00121	3.82514
GO:0018022	peptidyl-lysine methylation	36	6	1.57	1704	1	0.00132	0.69691	0.00132	3.82166
GO:0034968	histone lysine methylation	36	6	1.57	780	0.27371	0.00132	0.69691	0.00132	3.82166
GO:0061024	membrane organization	126	21	5.5	625	0.15262	6.2e-09	0.46487	6.2e-09	3.81818
GO:0031032	actomyosin structure organization	60	10	2.62	74	0.00412	0.00032	0.79191	0.00032	3.81679
GO:0055007	cardiac muscle cell differentiation	30	5	1.31	751	0.24827	0.00083	0.75062	0.00083	3.81679
GO:0003015	heart process	30	5	1.31	102	0.00707	0.00897	0.81266	0.00897	3.81679
GO:0055006	cardiac cell development	24	4	1.05	1796	1	0.00344	0.85043	0.00344	3.80952
GO:2001243	negative regulation of intrinsic apoptotic signaling pathway	24	4	1.05	125	0.00944	0.00445	0.23095	0.00445	3.80952
GO:0007029	endoplasmic reticulum organization	18	3	0.79	201	0.02438	3.7e-05	0.11375	3.7e-05	3.79747
GO:0060420	regulation of heart growth	18	3	0.79	1638	1	0.00051	0.19395	0.00051	3.79747
GO:0044409	entry into host	18	3	0.79	1647	1	0.00058	0.07285	0.00058	3.79747
GO:0021954	central nervous system neuron development	18	3	0.79	1670	1	0.00091	0.75265	0.00091	3.79747
GO:1904064	positive regulation of cation transmembrane transport	18	3	0.79	1679	1	0.00101	0.31611	0.00101	3.79747
GO:0008277	regulation of G protein-coupled receptor signaling pathway	18	3	0.79	202	0.02438	0.00691	0.03914	0.00691	3.79747
GO:0071347	cellular response to interleukin-1	18	3	0.79	203	0.02438	0.00692	0.0793	0.00692	3.79747
GO:0030835	negative regulation of actin filament depolymerization	18	3	0.79	1881	1	0.00764	0.18932	0.00764	3.79747
GO:0030316	osteoclast differentiation	18	3	0.79	1915	1	0.0095	0.54373	0.0095	3.79747
GO:0014706	striated muscle tissue development	55	9	2.4	1469	1	5.3e-06	0.44038	5.3e-06	3.75
GO:0007423	sensory organ development	86	14	3.75	389	0.06663	3.1e-05	0.33933	3.1e-05	3.73333
GO:0070828	heterochromatin organization	37	6	1.61	1506	1	2.5e-05	0.28396	2.5e-05	3.72671
GO:0015980	energy derivation by oxidation of organic compounds	37	6	1.61	1830	1	0.00493	0.32775	0.00493	3.72671
GO:0150063	visual system development	62	10	2.7	1443	1	1.8e-06	0.47345	1.8e-06	3.7037
GO:0001654	eye development	62	10	2.7	393	0.06765	1.8e-06	0.47345	1.8e-06	3.7037
GO:0048880	sensory system development	62	10	2.7	1444	1	1.8e-06	0.47345	1.8e-06	3.7037
GO:1901880	negative regulation of protein depolymerization	31	5	1.35	1715	1	0.00148	0.32686	0.00148	3.7037
GO:0031110	regulation of microtubule polymerization or depolymerization	31	5	1.35	405	0.06891	0.00151	0.75624	0.00151	3.7037
GO:0030218	erythrocyte differentiation	31	5	1.35	72	0.00392	0.00395	0.07222	0.00395	3.7037
GO:0030518	intracellular steroid hormone receptor signaling pathway	31	5	1.35	1861	1	0.00664	0.54334	0.00664	3.7037
GO:0016050	vesicle organization	56	9	2.44	1663	1	0.00077	0.32087	0.00077	3.68852
GO:0006892	post-Golgi vesicle-mediated transport	25	4	1.09	222	0.03022	0.00057	0.04887	0.00057	3.66972
GO:0045995	regulation of embryonic development	25	4	1.09	134	0.01093	0.00116	0.03977	0.00116	3.66972
GO:0061008	hepaticobiliary system development	25	4	1.09	240	0.0352	0.00147	0.11385	0.00147	3.66972
GO:0090311	regulation of protein deacetylation	25	4	1.09	1905	1	0.00886	0.18157	0.00886	3.66972
GO:0031056	regulation of histone modification	63	10	2.75	1882	1	0.00765	0.71022	0.00765	3.63636
GO:0002011	morphogenesis of an epithelial sheet	19	3	0.83	788	0.2764	5.8e-05	0.32501	5.8e-05	3.61446
GO:0007188	adenylate cyclase-modulating G protein-coupled receptor signaling pathway	19	3	0.83	658	0.16456	0.00107	0.7949	0.00107	3.61446
GO:0032411	positive regulation of transporter activity	19	3	0.83	414	0.06941	0.00194	0.1355	0.00194	3.61446
GO:0003205	cardiac chamber development	38	6	1.66	1866	1	0.00683	0.34165	0.00683	3.61446
GO:0070507	regulation of microtubule cytoskeleton organization	51	8	2.22	273	0.04513	6.2e-05	0.61168	6.2e-05	3.6036
GO:0001503	ossification	64	10	2.79	347	0.06239	1.5e-06	0.111	1.5e-06	3.58423
GO:0048545	response to steroid hormone	45	7	1.96	1496	1	1.8e-05	0.35498	1.8e-05	3.57143
GO:1902105	regulation of leukocyte differentiation	45	7	1.96	1608	1	0.00033	0.39517	0.00033	3.57143
GO:0045598	regulation of fat cell differentiation	32	5	1.4	1702	1	0.00129	0.16835	0.00129	3.57143
GO:0022407	regulation of cell-cell adhesion	58	9	2.53	642	0.16122	0.00937	0.82388	0.00937	3.55731
GO:0046620	regulation of organ growth	26	4	1.13	530	0.10193	1.1e-05	0.14438	1.1e-05	3.53982
GO:0015711	organic anion transport	26	4	1.13	531	0.10193	4.6e-05	0.058	4.6e-05	3.53982
GO:1904019	epithelial cell apoptotic process	26	4	1.13	196	0.02321	0.00126	0.35169	0.00126	3.53982
GO:0010001	glial cell differentiation	39	6	1.7	522	0.10122	2.5e-09	0.0361	2.5e-09	3.52941
GO:0048639	positive regulation of developmental growth	39	6	1.7	167	0.01715	8.2e-07	0.08588	8.2e-07	3.52941
GO:0007162	negative regulation of cell adhesion	39	6	1.7	1570	1	0.00012	0.28261	0.00012	3.52941
GO:0071383	cellular response to steroid hormone stimulus	39	6	1.7	1609	1	0.00035	0.491	0.00035	3.52941
GO:0031065	positive regulation of histone deacetylation	13	2	0.57	437	0.07587	0.00114	0.13881	0.00114	3.50877
GO:2000134	negative regulation of G1/S transition of mitotic cell cycle	13	2	0.57	438	0.07587	0.00146	0.38322	0.00146	3.50877
GO:1901379	regulation of potassium ion transmembrane transport	13	2	0.57	1858	1	0.00651	0.74467	0.00651	3.50877
GO:0044088	regulation of vacuole organization	13	2	0.57	1868	1	0.00689	0.69061	0.00689	3.50877
GO:2000785	regulation of autophagosome assembly	13	2	0.57	439	0.07587	0.00689	0.69061	0.00689	3.50877
GO:0030900	forebrain development	72	11	3.14	6	3.2e-06	1.1e-07	0.40643	1.1e-07	3.50318
GO:0019058	viral life cycle	59	9	2.57	693	0.19022	2e-05	0.71457	2e-05	3.50195
GO:0002252	immune effector process	59	9	2.57	69	0.00352	0.00345	0.22521	0.00345	3.50195
GO:0035601	protein deacylation	46	7	2.01	1490	1	1.4e-05	0.96048	1.4e-05	3.48259
GO:0006476	protein deacetylation	46	7	2.01	1491	1	1.4e-05	0.96048	1.4e-05	3.48259
GO:0098732	macromolecule deacylation	46	7	2.01	1492	1	1.4e-05	0.96048	1.4e-05	3.48259
GO:0008286	insulin receptor signaling pathway	46	7	2.01	213	0.02719	0.00077	0.55779	0.00077	3.48259
GO:0030705	cytoskeleton-dependent intracellular transport	46	7	2.01	1914	1	0.00949	0.82473	0.00949	3.48259
GO:0001837	epithelial to mesenchymal transition	33	5	1.44	866	0.32464	1.1e-07	0.31991	1.1e-07	3.47222
GO:0031109	microtubule polymerization or depolymerization	33	5	1.44	1724	1	0.00156	0.54496	0.00156	3.47222
GO:0000724	double-strand break repair via homologous recombination	33	5	1.44	168	0.01732	0.00162	0.12376	0.00162	3.47222
GO:0000725	recombinational repair	33	5	1.44	1726	1	0.00162	0.12376	0.00162	3.47222
GO:0043242	negative regulation of protein-containing complex disassembly	33	5	1.44	1817	1	0.00436	0.4368	0.00436	3.47222
GO:0035196	production of miRNAs involved in gene silencing by miRNA	20	3	0.87	228	0.03234	0.00091	0.18043	0.00091	3.44828
GO:0070918	primary sncRNA processing	20	3	0.87	1671	1	0.00091	0.18043	0.00091	3.44828
GO:0006814	sodium ion transport	20	3	0.87	416	0.06942	0.00605	0.31107	0.00605	3.44828
GO:0060840	artery development	20	3	0.87	1903	1	0.0088	0.5812	0.0088	3.44828
GO:0006302	double-strand break repair	60	9	2.62	272	0.04486	0.00043	0.12334	0.00043	3.43511
GO:0030522	intracellular receptor signaling pathway	47	7	2.05	548	0.10567	6.1e-05	0.53888	6.1e-05	3.41463
GO:0051099	positive regulation of binding	47	7	2.05	124	0.00939	0.00068	0.6762	0.00068	3.41463
GO:0048592	eye morphogenesis	27	4	1.18	652	0.16404	0.00021	0.60175	0.00021	3.38983
GO:0048562	embryonic organ morphogenesis	54	8	2.36	75	0.00422	0.00045	0.42228	0.00045	3.38983
GO:0001701	in utero embryonic development	122	18	5.32	18	0.00021	2.7e-10	0.20272	2.7e-10	3.38346
GO:0007163	establishment or maintenance of cell polarity	61	9	2.66	106	0.00727	3e-07	0.82702	3e-07	3.38346
GO:0042060	wound healing	61	9	2.66	27	0.00066	0.00601	0.98246	0.00601	3.38346
GO:0007626	locomotory behavior	34	5	1.48	627	0.15468	0.00015	0.32263	0.00015	3.37838
GO:0110020	regulation of actomyosin structure organization	34	5	1.48	407	0.06894	0.00116	0.35972	0.00116	3.37838
GO:0090596	sensory organ morphogenesis	41	6	1.79	1550	1	7.7e-05	0.34801	7.7e-05	3.35196
GO:0045444	fat cell differentiation	48	7	2.09	463	0.08389	0.0018	0.13692	0.0018	3.34928
GO:2001233	regulation of apoptotic signaling pathway	83	12	3.62	1591	1	0.00023	0.54524	0.00023	3.31492
GO:0010639	negative regulation of organelle organization	90	13	3.93	687	0.18776	6.8e-09	0.51027	6.8e-09	3.30789
GO:0010256	endomembrane system organization	118	17	5.15	862	0.3129	1.3e-08	0.45944	1.3e-08	3.30097
GO:0043010	camera-type eye development	56	8	2.44	427	0.07313	2.4e-05	0.66288	2.4e-05	3.27869
GO:0009615	response to virus	56	8	2.44	1560	1	9e-05	0.50005	9e-05	3.27869
GO:0045637	regulation of myeloid cell differentiation	42	6	1.83	523	0.10126	0.00021	0.09071	0.00021	3.27869
GO:0030217	T cell differentiation	42	6	1.83	1651	1	0.00061	0.64334	0.00061	3.27869
GO:0007026	negative regulation of microtubule depolymerization	14	2	0.61	467	0.08651	0.00182	0.46032	0.00182	3.27869
GO:0009199	ribonucleoside triphosphate metabolic process	14	2	0.61	1736	1	0.00185	0.22708	0.00185	3.27869
GO:0009144	purine nucleoside triphosphate metabolic process	14	2	0.61	247	0.03547	0.00185	0.41497	0.00185	3.27869
GO:0021782	glial cell development	14	2	0.61	468	0.08651	0.00259	0.17574	0.00259	3.27869
GO:0002028	regulation of sodium ion transport	14	2	0.61	1795	1	0.00344	0.36358	0.00344	3.27869
GO:0016571	histone methylation	42	6	1.83	1826	1	0.00482	0.81061	0.00482	3.27869
GO:1901796	regulation of signal transduction by p53 class mediator	14	2	0.61	469	0.08651	0.00509	0.10891	0.00509	3.27869
GO:0071364	cellular response to epidermal growth factor stimulus	14	2	0.61	470	0.08651	0.0051	0.20468	0.0051	3.27869
GO:1903317	regulation of protein maturation	14	2	0.61	1846	1	0.00589	0.56164	0.00589	3.27869
GO:0070613	regulation of protein processing	14	2	0.61	471	0.08651	0.00589	0.56164	0.00589	3.27869
GO:0048538	thymus development	14	2	0.61	472	0.08651	0.00988	0.41283	0.00988	3.27869
GO:1902532	negative regulation of intracellular signal transduction	105	15	4.58	1407	1	9.4e-08	0.01629	9.4e-08	3.27511
GO:0007266	Rho protein signal transduction	35	5	1.53	314	0.05503	9.1e-05	0.35507	9.1e-05	3.26797
GO:0034764	positive regulation of transmembrane transport	35	5	1.53	1584	1	0.0002	0.45827	0.0002	3.26797
GO:1901879	regulation of protein depolymerization	35	5	1.53	1694	1	0.00113	0.3366	0.00113	3.26797
GO:0006937	regulation of muscle contraction	21	3	0.92	261	0.03823	0.0003	0.15208	0.0003	3.26087
GO:0001570	vasculogenesis	21	3	0.92	252	0.03676	0.00087	0.55679	0.00087	3.26087
GO:0010595	positive regulation of endothelial cell migration	21	3	0.92	602	0.13402	0.00388	0.253	0.00388	3.26087
GO:0032922	circadian regulation of gene expression	21	3	0.92	253	0.03676	0.00543	0.50032	0.00543	3.26087
GO:0052126	movement in host environment	21	3	0.92	1839	1	0.00549	0.15305	0.00549	3.26087
GO:0003158	endothelium development	21	3	0.92	603	0.13402	0.007	0.66301	0.007	3.26087
GO:0030834	regulation of actin filament depolymerization	21	3	0.92	1901	1	0.00866	0.14862	0.00866	3.26087
GO:0044089	positive regulation of cellular component biogenesis	128	18	5.58	457	0.07824	5.9e-07	0.9869	5.9e-07	3.22581
GO:0031334	positive regulation of protein-containing complex assembly	57	8	2.49	227	0.03093	0.00309	0.67097	0.00309	3.21285
GO:0019827	stem cell population maintenance	43	6	1.88	208	0.025	3.2e-05	0.06932	3.2e-05	3.19149
GO:0006997	nucleus organization	43	6	1.88	57	0.00229	0.00077	0.59351	0.00077	3.19149
GO:0031058	positive regulation of histone modification	43	6	1.88	429	0.07407	0.00104	0.68301	0.00104	3.19149
GO:0044782	cilium organization	43	6	1.88	524	0.10128	0.00119	0.81908	0.00119	3.19149
GO:0033673	negative regulation of kinase activity	43	6	1.88	1809	1	0.0041	0.17843	0.0041	3.19149
GO:0051258	protein polymerization	79	11	3.45	1616	1	0.00039	0.5638	0.00039	3.18841
GO:0019079	viral genome replication	36	5	1.57	752	0.24849	0.00133	0.88122	0.00133	3.18471
GO:0034101	erythrocyte homeostasis	36	5	1.57	1751	1	0.00218	0.06017	0.00218	3.18471
GO:0007507	heart development	137	19	5.98	189	0.02144	8.6e-08	0.30508	8.6e-08	3.17726
GO:1903131	mononuclear cell differentiation	65	9	2.84	718	0.21838	0.00394	0.75208	0.00394	3.16901
GO:0006897	endocytosis	123	17	5.37	156	0.01462	3.2e-13	0.30552	3.2e-13	3.16574
GO:0009117	nucleotide metabolic process	58	8	2.53	1441	1	1.5e-06	0.00697	1.5e-06	3.16206
GO:0006753	nucleoside phosphate metabolic process	58	8	2.53	1442	1	1.5e-06	1	1.5e-06	3.16206
GO:0030098	lymphocyte differentiation	58	8	2.53	1851	1	0.00608	0.75727	0.00608	3.16206
GO:0051249	regulation of lymphocyte activation	51	7	2.22	1622	1	0.00042	0.47706	0.00042	3.15315
GO:0032989	cellular component morphogenesis	160	22	6.98	1362	1	1.2e-10	0.98141	1.2e-10	3.15186
GO:0018107	peptidyl-threonine phosphorylation	29	4	1.27	215	0.02799	6.6e-06	0.20391	6.6e-06	3.14961
GO:0018210	peptidyl-threonine modification	29	4	1.27	1475	1	6.6e-06	0.20391	6.6e-06	3.14961
GO:0045165	cell fate commitment	29	4	1.27	174	0.01837	2.1e-05	0.6381	2.1e-05	3.14961
GO:0002833	positive regulation of response to biotic stimulus	29	4	1.27	43	0.00139	0.00374	0.26477	0.00374	3.14961
GO:0030029	actin filament-based process	219	30	9.55	1363	1	1.3e-10	0.7236	1.3e-10	3.14136
GO:0030155	regulation of cell adhesion	117	16	5.1	715	0.21342	2.1e-07	0.84143	2.1e-07	3.13725
GO:0003008	system process	205	28	8.94	1344	1	1.2e-11	0.61724	1.2e-11	3.13199
GO:0030036	actin cytoskeleton organization	205	28	8.94	68	0.00348	3.7e-10	0.86831	3.7e-10	3.13199
GO:0035265	organ growth	44	6	1.92	1462	1	3.9e-06	0.13272	3.9e-06	3.125
GO:0098727	maintenance of cell number	44	6	1.92	1493	1	1.5e-05	0.06176	1.5e-05	3.125
GO:1990823	response to leukemia inhibitory factor	22	3	0.96	1509	1	2.7e-05	0.02986	2.7e-05	3.125
GO:1990830	cellular response to leukemia inhibitory factor	22	3	0.96	264	0.04148	2.7e-05	0.02986	2.7e-05	3.125
GO:0032886	regulation of microtubule-based process	66	9	2.88	1056	0.41004	0.00011	0.70955	0.00011	3.125
GO:0000070	mitotic sister chromatid segregation	44	6	1.92	46	0.00153	0.00027	0.22313	0.00027	3.125
GO:0007088	regulation of mitotic nuclear division	22	3	0.96	361	0.06535	0.0003	0.04818	0.0003	3.125
GO:0006909	phagocytosis	22	3	0.96	880	0.32668	0.00124	0.28764	0.00124	3.125
GO:0032409	regulation of transporter activity	44	6	1.92	1766	1	0.00257	0.11374	0.00257	3.125
GO:0098739	import across plasma membrane	22	3	0.96	265	0.04148	0.00416	0.14916	0.00416	3.125
GO:0048593	camera-type eye morphogenesis	22	3	0.96	266	0.04148	0.00482	0.73571	0.00482	3.125
GO:0006898	receptor-mediated endocytosis	59	8	2.57	313	0.05403	1.3e-05	0.58539	1.3e-05	3.11284
GO:0030100	regulation of endocytosis	59	8	2.57	350	0.06336	0.00022	0.42257	0.00022	3.11284
GO:0001667	ameboidal-type cell migration	89	12	3.88	343	0.06178	2.8e-05	0.94255	2.8e-05	3.09278
GO:0048667	cell morphogenesis involved in neuron differentiation	119	16	5.19	132	0.01068	8.6e-11	0.9651	8.6e-11	3.08285
GO:0065003	protein-containing complex assembly	283	38	12.34	8	1.3e-05	1.1e-16	0.32461	1.1e-16	3.07942
GO:0120193	tight junction organization	15	2	0.65	248	0.03547	0.00022	0.98143	0.00022	3.07692
GO:0031114	regulation of microtubule depolymerization	15	2	0.65	1678	1	0.00101	0.3593	0.00101	3.07692
GO:1902807	negative regulation of cell cycle G1/S phase transition	15	2	0.65	1720	1	0.00151	0.45559	0.00151	3.07692
GO:0002250	adaptive immune response	45	6	1.96	354	0.06417	0.00316	0.43033	0.00316	3.06122
GO:0040013	negative regulation of locomotion	45	6	1.96	399	0.06874	0.00434	0.46046	0.00434	3.06122
GO:0051493	regulation of cytoskeleton organization	150	20	6.54	629	0.15548	2e-08	0.17104	2e-08	3.0581
GO:0006091	generation of precursor metabolites and energy	60	8	2.62	1587	1	0.00021	0.1119	0.00021	3.05344
GO:1904018	positive regulation of vasculature development	30	4	1.31	1856	1	0.00645	0.05199	0.00645	3.05344
GO:0045766	positive regulation of angiogenesis	30	4	1.31	180	0.02063	0.00645	0.05199	0.00645	3.05344
GO:0019693	ribose phosphate metabolic process	53	7	2.31	1467	1	4.9e-06	0.007	4.9e-06	3.0303
GO:0006163	purine nucleotide metabolic process	53	7	2.31	236	0.03487	1.9e-05	0.02326	1.9e-05	3.0303
GO:2001234	negative regulation of apoptotic signaling pathway	53	7	2.31	1542	1	6.1e-05	0.15337	6.1e-05	3.0303
GO:0090407	organophosphate biosynthetic process	53	7	2.31	1177	0.57262	0.00167	0.06396	0.00167	3.0303
GO:0097435	supramolecular fiber organization	182	24	7.94	131	0.00985	3.8e-09	0.64714	3.8e-09	3.02267
GO:0050770	regulation of axonogenesis	38	5	1.66	178	0.02053	2.7e-06	0.66792	2.7e-06	3.01205
GO:0044057	regulation of system process	76	10	3.32	745	0.24475	9.3e-06	0.29294	9.3e-06	3.01205
GO:0006935	chemotaxis	76	10	3.32	1495	1	1.7e-05	0.56108	1.7e-05	3.01205
GO:0035051	cardiocyte differentiation	38	5	1.66	1519	1	3.2e-05	0.65123	3.2e-05	3.01205
GO:0046649	lymphocyte activation	99	13	4.32	1623	1	0.00043	0.5427	0.00043	3.00926
GO:0050768	negative regulation of neurogenesis	23	3	1	275	0.04649	4.8e-06	0.22785	4.8e-06	3
GO:0051961	negative regulation of nervous system development	23	3	1	1466	1	4.8e-06	0.22785	4.8e-06	3
GO:0046942	carboxylic acid transport	23	3	1	881	0.32673	2e-05	0.0603	2e-05	3
GO:0045069	regulation of viral genome replication	23	3	1	1581	1	0.00017	0.98255	0.00017	3
GO:0097061	dendritic spine organization	23	3	1	1637	1	0.00048	0.80058	0.00048	3
GO:0051304	chromosome separation	23	3	1	604	0.13406	0.00064	0.28256	0.00064	3
GO:0046394	carboxylic acid biosynthetic process	23	3	1	659	0.16466	0.00071	0.24093	0.00071	3
GO:0016053	organic acid biosynthetic process	23	3	1	1658	1	0.00071	0.24093	0.00071	3
GO:0051983	regulation of chromosome segregation	23	3	1	605	0.13406	0.00163	0.79451	0.00163	3
GO:0000381	regulation of alternative mRNA splicing, via spliceosome	23	3	1	276	0.04649	0.00215	0.30125	0.00215	3
GO:0006406	mRNA export from nucleus	23	3	1	277	0.04649	0.00278	0.35968	0.00278	3
GO:0071674	mononuclear cell migration	23	3	1	1876	1	0.00746	0.47708	0.00746	3
GO:0120031	plasma membrane bounded cell projection assembly	92	12	4.01	1123	0.48382	7.4e-07	0.66933	7.4e-07	2.99252
GO:0009314	response to radiation	69	9	3.01	1544	1	6.3e-05	0.0975	6.3e-05	2.99003
GO:0042110	T cell activation	69	9	3.01	1667	1	0.00082	0.54447	0.00082	2.99003
GO:0030010	establishment of cell polarity	46	6	2.01	319	0.05591	7.8e-06	0.91167	7.8e-06	2.98507
GO:0045732	positive regulation of protein catabolic process	46	6	2.01	53	0.00199	0.00383	0.68393	0.00383	2.98507
GO:0010038	response to metal ion	46	6	2.01	56	0.00213	0.00654	0.20642	0.00654	2.98507
GO:0032956	regulation of actin cytoskeleton organization	100	13	4.36	777	0.2683	4.2e-05	0.28669	4.2e-05	2.98165
GO:0048589	developmental growth	154	20	6.72	771	0.26234	1.6e-12	0.22223	1.6e-12	2.97619
GO:0042330	taxis	77	10	3.36	1516	1	3e-05	0.60287	3e-05	2.97619
GO:0016570	histone modification	139	18	6.06	1425	1	4.2e-07	0.52579	4.2e-07	2.9703
GO:0048588	developmental cell growth	54	7	2.36	645	0.16257	6.3e-08	0.15142	6.3e-08	2.9661
GO:0072521	purine-containing compound metabolic process	54	7	2.36	1482	1	9.4e-06	0.01676	9.4e-06	2.9661
GO:0040029	regulation of gene expression, epigenetic	54	7	2.36	1507	1	2.6e-05	0.79813	2.6e-05	2.9661
GO:1902903	regulation of supramolecular fiber organization	116	15	5.06	390	0.06663	1e-06	0.26816	1e-06	2.96443
GO:0032869	cellular response to insulin stimulus	62	8	2.7	975	0.36831	1.9e-06	0.24599	1.9e-06	2.96296
GO:1903706	regulation of hemopoiesis	62	8	2.7	1549	1	7.5e-05	0.26801	7.5e-05	2.96296
GO:0090130	tissue migration	62	8	2.7	1558	1	8.9e-05	0.92974	8.9e-05	2.96296
GO:0090132	epithelium migration	62	8	2.7	1559	1	8.9e-05	0.92974	8.9e-05	2.96296
GO:0010631	epithelial cell migration	62	8	2.7	29	0.00079	8.9e-05	0.92974	8.9e-05	2.96296
GO:0048872	homeostasis of number of cells	62	8	2.7	1758	1	0.00239	0.27401	0.00239	2.96296
GO:0072593	reactive oxygen species metabolic process	31	4	1.35	197	0.02325	0.00247	0.10663	0.00247	2.96296
GO:0044087	regulation of cellular component biogenesis	240	31	10.47	1324	1	1.4e-13	0.90242	1.4e-13	2.96084
GO:0032271	regulation of protein polymerization	70	9	3.05	1602	1	0.0003	0.34377	0.0003	2.95082
GO:0032970	regulation of actin filament-based process	109	14	4.75	776	0.26751	1.6e-05	0.23591	1.6e-05	2.94737
GO:0048863	stem cell differentiation	39	5	1.7	698	0.19297	4e-06	0.76172	4e-06	2.94118
GO:0007010	cytoskeleton organization	344	44	15.01	649	0.16301	< 1e-30	0.54693	1e-30	2.93138
GO:0033002	muscle cell proliferation	47	6	2.05	1649	1	0.00059	0.49928	0.00059	2.92683
GO:0098609	cell-cell adhesion	102	13	4.45	1179	0.57972	5.2e-06	0.4131	5.2e-06	2.92135
GO:0000904	cell morphogenesis involved in differentiation	157	20	6.85	486	0.08753	3.4e-13	0.96794	3.4e-13	2.91971
GO:0051017	actin filament bundle assembly	55	7	2.4	109	0.00744	0.00027	0.62909	0.00027	2.91667
GO:0061572	actin filament bundle organization	55	7	2.4	1598	1	0.00027	0.62909	0.00027	2.91667
GO:0030041	actin filament polymerization	55	7	2.4	135	0.01138	0.00411	0.47418	0.00411	2.91667
GO:0072359	circulatory system development	228	29	9.95	1358	1	8.8e-11	0.203	8.8e-11	2.91457
GO:0032984	protein-containing complex disassembly	63	8	2.75	1058	0.41141	0.00011	0.41128	0.00011	2.90909
GO:0048638	regulation of developmental growth	71	9	3.1	1369	1	5.3e-10	0.03022	5.3e-10	2.90323
GO:0031647	regulation of protein stability	71	9	3.1	212	0.02681	8.3e-05	0.76485	8.3e-05	2.90323
GO:0050865	regulation of cell activation	71	9	3.1	1673	1	0.00092	0.56271	0.00092	2.90323
GO:0030031	cell projection assembly	95	12	4.14	1439	1	1.4e-06	0.70696	1.4e-06	2.89855
GO:0018205	peptidyl-lysine modification	87	11	3.8	641	0.1605	7.6e-07	0.51712	7.6e-07	2.89474
GO:0022607	cellular component assembly	531	67	23.16	1272	1	< 1e-30	0.45361	1e-30	2.89292
GO:0007155	cell adhesion	191	24	8.33	435	0.07558	2.1e-10	0.72787	2.1e-10	2.88115
GO:0048585	negative regulation of response to stimulus	255	32	11.12	623	0.14907	< 1e-30	0.02557	1e-30	2.8777
GO:0040011	locomotion	303	38	13.22	1227	1	< 1e-30	0.96469	1e-30	2.87443
GO:0002573	myeloid leukocyte differentiation	40	5	1.74	868	0.32495	0.00011	0.12092	0.00011	2.87356
GO:0002262	myeloid cell homeostasis	40	5	1.74	1765	1	0.00254	0.07411	0.00254	2.87356
GO:0060271	cilium assembly	40	5	1.74	430	0.07438	0.00296	0.79496	0.00296	2.87356
GO:1902115	regulation of organelle assembly	48	6	2.09	781	0.27418	0.00039	0.90118	0.00039	2.87081
GO:0001655	urogenital system development	64	8	2.79	516	0.10069	0.00112	0.56532	0.00112	2.86738
GO:0042692	muscle cell differentiation	80	10	3.49	1446	1	2e-06	0.75987	2e-06	2.86533
GO:0007409	axonogenesis	88	11	3.84	149	0.01371	4.5e-10	0.71943	4.5e-10	2.86458
GO:0002521	leukocyte differentiation	88	11	3.84	1461	1	3.8e-06	0.61641	3.8e-06	2.86458
GO:0051783	regulation of nuclear division	24	3	1.05	1596	1	0.00026	0.05356	0.00026	2.85714
GO:0090090	negative regulation of canonical Wnt signaling pathway	32	4	1.4	209	0.02562	0.00108	0.76566	0.00108	2.85714
GO:0009410	response to xenobiotic stimulus	24	3	1.05	306	0.05179	0.0011	0.44573	0.0011	2.85714
GO:0051293	establishment of spindle localization	16	2	0.7	663	0.16519	0.0012	0.86264	0.0012	2.85714
GO:0044242	cellular lipid catabolic process	16	2	0.7	550	0.10897	0.00132	0.02858	0.00132	2.85714
GO:0007405	neuroblast proliferation	16	2	0.7	551	0.10897	0.00146	0.96545	0.00146	2.85714
GO:0006090	pyruvate metabolic process	24	3	1.05	417	0.06946	0.00219	0.0314	0.00219	2.85714
GO:0051302	regulation of cell division	32	4	1.4	756	0.24938	0.00255	0.17669	0.00255	2.85714
GO:1902106	negative regulation of leukocyte differentiation	16	2	0.7	1769	1	0.00261	0.65574	0.00261	2.85714
GO:0051492	regulation of stress fiber assembly	32	4	1.4	1788	1	0.0031	0.47076	0.0031	2.85714
GO:2001251	negative regulation of chromosome organization	24	3	1.05	307	0.05179	0.00316	0.60291	0.00316	2.85714
GO:0001889	liver development	24	3	1.05	308	0.05179	0.00336	0.12863	0.00336	2.85714
GO:0045599	negative regulation of fat cell differentiation	16	2	0.7	552	0.10897	0.00353	0.15177	0.00353	2.85714
GO:0032092	positive regulation of protein binding	24	3	1.05	309	0.05179	0.00434	0.77379	0.00434	2.85714
GO:0042742	defense response to bacterium	16	2	0.7	553	0.10897	0.00436	0.19955	0.00436	2.85714
GO:0035023	regulation of Rho protein signal transduction	24	3	1.05	310	0.05179	0.00466	0.70347	0.00466	2.85714
GO:2001257	regulation of cation channel activity	24	3	1.05	1037	0.39556	0.00808	0.17616	0.00808	2.85714
GO:0006612	protein targeting to membrane	24	3	1.05	311	0.05179	0.00961	0.98134	0.00961	2.85714
GO:0045321	leukocyte activation	121	15	5.28	1548	1	7.4e-05	0.30795	7.4e-05	2.84091
GO:0006281	DNA repair	113	14	4.93	263	0.04006	6.5e-06	0.19984	6.5e-06	2.83976
GO:0009968	negative regulation of signal transduction	218	27	9.51	1095	0.44159	4.4e-16	0.00373	4.4e-16	2.83912
GO:0043933	protein-containing complex organization	323	40	14.09	617	0.14461	1.1e-16	0.47502	1.1e-16	2.83889
GO:0000398	mRNA splicing, via spliceosome	105	13	4.58	561	0.11705	2.7e-11	0.04777	2.7e-11	2.83843
GO:0000375	RNA splicing, via transesterification reactions	105	13	4.58	1347	1	2.7e-11	0.04777	2.7e-11	2.83843
GO:0000377	RNA splicing, via transesterification reactions with bulged adenosine as nucleophile	105	13	4.58	1348	1	2.7e-11	0.04777	2.7e-11	2.83843
GO:0110053	regulation of actin filament organization	89	11	3.88	392	0.06763	3.9e-05	0.31564	3.9e-05	2.83505
GO:0040012	regulation of locomotion	179	22	7.81	1339	1	5.1e-12	0.98515	5.1e-12	2.8169
GO:0002694	regulation of leukocyte activation	65	8	2.84	585	0.13196	0.00092	0.52849	0.00092	2.8169
GO:0006310	DNA recombination	57	7	2.49	1078	0.43305	0.00039	0.11719	0.00039	2.81124
GO:0051301	cell division	147	18	6.41	148	0.01302	2.9e-13	0.29613	2.9e-13	2.80811
GO:0051270	regulation of cellular component movement	188	23	8.2	211	0.02673	5.3e-11	0.98134	5.3e-11	2.80488
GO:0006928	movement of cell or subcellular component	360	44	15.7	1271	1	< 1e-30	0.99999	1e-30	2.80255
GO:0048812	neuron projection morphogenesis	131	16	5.71	1365	1	2.5e-10	0.97425	2.5e-10	2.8021
GO:0019752	carboxylic acid metabolic process	82	10	3.58	1526	1	4e-05	0.14045	4e-05	2.7933
GO:0043244	regulation of protein-containing complex disassembly	41	5	1.79	1662	1	0.00073	0.51683	0.00073	2.7933
GO:0043270	positive regulation of ion transport	41	5	1.79	869	0.32499	0.00143	0.29764	0.00143	2.7933
GO:0006820	anion transport	41	5	1.79	1711	1	0.00143	0.31302	0.00143	2.7933
GO:0072657	protein localization to membrane	115	14	5.02	191	0.02181	8.3e-09	0.84164	8.3e-09	2.78884
GO:0016477	cell migration	272	33	11.87	126	0.00956	< 1e-30	0.97997	1e-30	2.78012
GO:0000226	microtubule cytoskeleton organization	132	16	5.76	230	0.03289	5.2e-12	0.27355	5.2e-12	2.77778
GO:0006631	fatty acid metabolic process	33	4	1.44	875	0.32591	0.00193	0.15304	0.00193	2.77778
GO:0007044	cell-substrate junction assembly	33	4	1.44	17	0.00017	0.00472	0.62652	0.00472	2.77778
GO:0048513	animal organ development	529	64	23.08	1280	1	< 1e-30	0.00433	1e-30	2.77296
GO:0007169	transmembrane receptor protein tyrosine kinase signaling pathway	124	15	5.41	1183	0.59172	2.1e-09	0.15412	2.1e-09	2.77264
GO:0044085	cellular component biogenesis	596	72	26	1245	1	< 1e-30	0.55341	1e-30	2.76923
GO:0042063	gliogenesis	58	7	2.53	1389	1	2.2e-08	0.18391	2.2e-08	2.7668
GO:0032990	cell part morphogenesis	141	17	6.15	579	0.1281	2.4e-11	0.96924	2.4e-11	2.76423
GO:0002520	immune system development	166	20	7.24	685	0.18398	1.7e-09	0.5733	1.7e-09	2.76243
GO:0043436	oxoacid metabolic process	83	10	3.62	1543	1	6.2e-05	0.15298	6.2e-05	2.76243
GO:0043009	chordate embryonic development	183	22	7.98	1336	1	1.1e-12	0.33343	1.1e-12	2.75689
GO:0000902	cell morphogenesis	233	28	10.16	52	0.0019	4.9e-15	0.88258	4.9e-15	2.75591
GO:0007017	microtubule-based process	175	21	7.63	1332	1	7.6e-13	0.53815	7.6e-13	2.75229
GO:0048024	regulation of mRNA splicing, via spliceosome	50	6	2.18	697	0.19246	5e-08	0.35529	5e-08	2.75229
GO:0019637	organophosphate metabolic process	100	12	4.36	1428	1	4.7e-07	0.37631	4.7e-07	2.75229
GO:0009185	ribonucleoside diphosphate metabolic process	25	3	1.09	246	0.03537	0.0002	0.01284	0.0002	2.75229
GO:0044255	cellular lipid metabolic process	75	9	3.27	1597	1	0.00026	0.02995	0.00026	2.75229
GO:0001822	kidney development	50	6	2.18	199	0.02383	0.00033	0.62055	0.00033	2.75229
GO:1901137	carbohydrate derivative biosynthetic process	50	6	2.18	1628	1	0.00045	0.0545	0.00045	2.75229
GO:0042147	retrograde transport, endosome to Golgi	25	3	1.09	339	0.05736	0.00046	0.01343	0.00046	2.75229
GO:0106027	neuron projection organization	25	3	1.09	1642	1	0.00053	0.97913	0.00053	2.75229
GO:0090150	establishment of protein localization to membrane	50	6	2.18	1762	1	0.0025	0.99026	0.0025	2.75229
GO:0070372	regulation of ERK1 and ERK2 cascade	50	6	2.18	136	0.01147	0.00302	0.91619	0.00302	2.75229
GO:0010769	regulation of cell morphogenesis involved in differentiation	25	3	1.09	1871	1	0.00721	0.88461	0.00721	2.75229
GO:0000018	regulation of DNA recombination	25	3	1.09	761	0.25015	0.0096	0.31556	0.0096	2.75229
GO:0033043	regulation of organelle organization	275	33	12	679	0.17577	2.4e-14	0.86131	2.4e-14	2.75
GO:0032870	cellular response to hormone stimulus	117	14	5.1	1368	1	4.2e-10	0.04212	4.2e-10	2.7451
GO:0006974	cellular response to DNA damage stimulus	184	22	8.03	175	0.01881	6.2e-09	0.0465	6.2e-09	2.73973
GO:0050684	regulation of mRNA processing	67	8	2.92	258	0.03713	1.2e-08	0.41121	1.2e-08	2.73973
GO:0055086	nucleobase-containing small molecule metabolic process	67	8	2.92	1420	1	2.6e-07	0.0379	2.6e-07	2.73973
GO:0010720	positive regulation of cell development	67	8	2.92	643	0.16217	6.2e-07	0.81529	6.2e-07	2.73973
GO:0051495	positive regulation of cytoskeleton organization	67	8	2.92	351	0.06351	0.00205	0.07673	0.00205	2.73973
GO:0008154	actin polymerization or depolymerization	67	8	2.92	1918	1	0.00969	0.59038	0.00969	2.73973
GO:0016071	mRNA metabolic process	226	27	9.86	1255	1	< 1e-30	0.2797	1e-30	2.73834
GO:0016049	cell growth	109	13	4.75	1372	1	9e-10	0.2519	9e-10	2.73684
GO:0016482	cytosolic transport	42	5	1.83	564	0.11876	0.0001	0.04019	0.0001	2.73224
GO:0051651	maintenance of location in cell	42	5	1.83	346	0.06219	0.00022	0.33706	0.00022	2.73224
GO:0090316	positive regulation of intracellular protein transport	42	5	1.83	179	0.02057	0.00366	0.66682	0.00366	2.73224
GO:0007420	brain development	126	15	5.5	560	0.11543	1.7e-09	0.11516	1.7e-09	2.72727
GO:0051674	localization of cell	286	34	12.48	1249	1	< 1e-30	0.99264	1e-30	2.72436
GO:0048870	cell motility	286	34	12.48	920	0.34103	< 1e-30	0.99264	1e-30	2.72436
GO:0045927	positive regulation of growth	59	7	2.57	1413	1	1.8e-07	0.07576	1.8e-07	2.72374
GO:0031668	cellular response to extracellular stimulus	59	7	2.57	160	0.0167	0.00018	0.79941	0.00018	2.72374
GO:0048534	hematopoietic or lymphoid organ development	160	19	6.98	578	0.12727	2.9e-09	0.49802	2.9e-09	2.72206
GO:0051656	establishment of organelle localization	101	12	4.41	1473	1	6.5e-06	0.98182	6.5e-06	2.72109
GO:0043254	regulation of protein-containing complex assembly	118	14	5.15	426	0.07077	2.6e-06	0.85464	2.6e-06	2.71845
GO:0045785	positive regulation of cell adhesion	76	9	3.32	45	0.00148	0.00077	0.40428	0.00077	2.71084
GO:0009259	ribonucleotide metabolic process	51	6	2.22	1468	1	5e-06	0.01185	5e-06	2.7027
GO:0000819	sister chromatid segregation	51	6	2.22	1524	1	3.5e-05	0.16019	3.5e-05	2.7027
GO:0031047	gene silencing by RNA	34	4	1.48	598	0.1337	0.0002	0.11715	0.0002	2.7027
GO:0070849	response to epidermal growth factor	17	2	0.74	1607	1	0.00032	0.21755	0.00032	2.7027
GO:1903900	regulation of viral life cycle	34	4	1.48	876	0.32595	0.00035	0.91262	0.00035	2.7027
GO:0006633	fatty acid biosynthetic process	17	2	0.74	567	0.12072	0.00172	0.20989	0.00172	2.7027
GO:0043297	apical junction assembly	17	2	0.74	664	0.16522	0.00252	0.96128	0.00252	2.7027
GO:0010569	regulation of double-strand break repair via homologous recombination	17	2	0.74	568	0.12072	0.00259	0.17878	0.00259	2.7027
GO:0150115	cell-substrate junction organization	34	4	1.48	1774	1	0.00272	0.59713	0.00272	2.7027
GO:0032414	positive regulation of ion transmembrane transporter activity	17	2	0.74	1782	1	0.00289	0.30019	0.00289	2.7027
GO:0010634	positive regulation of epithelial cell migration	34	4	1.48	982	0.37255	0.00312	0.71848	0.00312	2.7027
GO:1903707	negative regulation of hemopoiesis	17	2	0.74	1864	1	0.00676	0.62102	0.00676	2.7027
GO:0043536	positive regulation of blood vessel endothelial cell migration	17	2	0.74	569	0.12072	0.00787	0.16124	0.00787	2.7027
GO:0009792	embryo development ending in birth or egg hatching	187	22	8.16	1329	1	2.9e-13	0.2964	2.9e-13	2.69608
GO:0006338	chromatin remodeling	68	8	2.97	305	0.05016	0.00443	0.28467	0.00443	2.6936
GO:0007015	actin filament organization	128	15	5.58	622	0.14684	5.9e-07	0.73637	5.9e-07	2.68817
GO:0060429	epithelium development	205	24	8.94	1351	1	5e-11	0.93611	5e-11	2.68456
GO:0016032	viral process	94	11	4.1	865	0.31965	8.5e-06	0.78928	8.5e-06	2.68293
GO:0030099	myeloid cell differentiation	77	9	3.36	1512	1	2.9e-05	0.11643	2.9e-05	2.67857
GO:0120039	plasma membrane bounded cell projection morphogenesis	137	16	5.98	1355	1	7.8e-11	0.97157	7.8e-11	2.67559
GO:0048858	cell projection morphogenesis	137	16	5.98	1356	1	7.8e-11	0.97157	7.8e-11	2.67559
GO:0051094	positive regulation of developmental process	240	28	10.47	388	0.06606	1.5e-13	0.56656	1.5e-13	2.67431
GO:0033157	regulation of intracellular protein transport	60	7	2.62	586	0.13245	7.7e-05	0.61943	7.7e-05	2.67176
GO:0045184	establishment of protein localization	309	36	13.48	565	0.11972	1.4e-15	0.63221	1.4e-15	2.67062
GO:0006397	mRNA processing	172	20	7.5	315	0.05526	1.8e-14	0.15933	1.8e-14	2.66667
GO:2000145	regulation of cell motility	172	20	7.5	34	0.00112	4.1e-11	0.98756	4.1e-11	2.66667
GO:0060537	muscle tissue development	86	10	3.75	1463	1	4.4e-06	0.56133	4.4e-06	2.66667
GO:0051668	localization within membrane	129	15	5.63	1370	1	6.5e-10	0.7011	6.5e-10	2.6643
GO:0097190	apoptotic signaling pathway	129	15	5.63	639	0.15863	0.00048	0.55251	0.00048	2.6643
GO:0050821	protein stabilization	43	5	1.88	169	0.0174	0.00012	0.40034	0.00012	2.65957
GO:0007264	small GTPase mediated signal transduction	112	13	4.89	342	0.06167	3.1e-08	0.85393	3.1e-08	2.65849
GO:0032868	response to insulin	69	8	3.01	1445	1	1.9e-06	0.2213	1.9e-06	2.65781
GO:0009132	nucleoside diphosphate metabolic process	26	3	1.13	1554	1	8.4e-05	0.01043	8.4e-05	2.65487
GO:1900076	regulation of cellular response to insulin stimulus	26	3	1.13	1698	1	0.00121	0.8348	0.00121	2.65487
GO:2000779	regulation of double-strand break repair	26	3	1.13	1734	1	0.00181	0.37233	0.00181	2.65487
GO:0048525	negative regulation of viral process	26	3	1.13	922	0.35063	0.00384	0.76843	0.00384	2.65487
GO:0009611	response to wounding	78	9	3.4	1707	1	0.00136	0.90226	0.00136	2.64706
GO:0010648	negative regulation of cell communication	234	27	10.21	1315	1	9.7e-15	0.67064	9.7e-15	2.64447
GO:0023057	negative regulation of signaling	234	27	10.21	1316	1	9.7e-15	0.67064	9.7e-15	2.64447
GO:0072001	renal system development	52	6	2.27	1593	1	0.00024	0.63805	0.00024	2.64317
GO:0048468	cell development	391	45	17.06	1034	0.38792	< 1e-30	0.74408	1e-30	2.63775
GO:0030097	hemopoiesis	148	17	6.46	863	0.31422	2.4e-08	0.60427	2.4e-08	2.63158
GO:0003012	muscle system process	61	7	2.66	1525	1	3.8e-05	0.59651	3.8e-05	2.63158
GO:0010035	response to inorganic substance	87	10	3.8	312	0.05356	0.0015	0.31185	0.0015	2.63158
GO:1902905	positive regulation of supramolecular fiber organization	61	7	2.66	696	0.19195	0.00678	0.20633	0.00678	2.63158
GO:0051239	regulation of multicellular organismal process	401	46	17.49	487	0.08769	< 1e-30	0.20313	1e-30	2.63007
GO:0042592	homeostatic process	245	28	10.69	1309	1	8.9e-16	0.02278	8.9e-16	2.61927
GO:0051240	positive regulation of multicellular organismal process	219	25	9.55	257	0.03709	2.2e-13	0.31918	2.2e-13	2.6178
GO:0045664	regulation of neuron differentiation	35	4	1.53	786	0.27591	0.0004	0.4389	0.0004	2.61438
GO:0000122	negative regulation of transcription by RNA polymerase II	202	23	8.81	4	5.9e-07	1.9e-10	0.58882	1.9e-10	2.61067
GO:0006082	organic acid metabolic process	88	10	3.84	1486	1	1.1e-05	0.10199	1.1e-05	2.60417
GO:0099173	postsynapse organization	44	5	1.92	464	0.08517	0.0009	0.62414	0.0009	2.60417
GO:0006996	organelle organization	775	88	33.81	638	0.15832	< 1e-30	0.87917	1e-30	2.60278
GO:0061564	axon development	97	11	4.23	1367	1	4e-10	0.85918	4e-10	2.60047
GO:1903311	regulation of mRNA metabolic process	106	12	4.62	1377	1	1.7e-09	0.42373	1.7e-09	2.5974
GO:0060560	developmental growth involved in morphogenesis	53	6	2.31	498	0.09551	6e-07	0.41842	6e-07	2.5974
GO:0018193	peptidyl-amino acid modification	221	25	9.64	497	0.09546	9.8e-13	0.74442	9.8e-13	2.59336
GO:0048731	system development	672	76	29.31	1252	1	< 1e-30	0.40087	1e-30	2.59297
GO:0007275	multicellular organism development	787	89	34.33	692	0.19006	< 1e-30	0.44714	1e-30	2.59248
GO:0009888	tissue development	336	38	14.66	1240	1	< 1e-30	0.08933	1e-30	2.59209
GO:0002682	regulation of immune system process	177	20	7.72	1430	1	5e-07	0.0388	5e-07	2.59067
GO:0001775	cell activation	133	15	5.8	1564	1	0.0001	0.61699	0.0001	2.58621
GO:0040007	growth	213	24	9.29	1323	1	5.3e-14	0.27943	5.3e-14	2.58342
GO:0015031	protein transport	293	33	12.78	13	5.8e-05	6.3e-15	0.81357	6.3e-15	2.58216
GO:0032501	multicellular organismal process	964	108	42.05	1263	1	< 1e-30	0.04604	1e-30	2.56837
GO:0009790	embryo development	260	29	11.34	1301	1	1.1e-16	0.082	1.1e-16	2.55732
GO:0009653	anatomical structure morphogenesis	494	55	21.55	1257	1	< 1e-30	0.8641	1e-30	2.5522
GO:0060541	respiratory system development	45	5	1.96	595	0.13333	0.00129	0.4124	0.00129	2.55102
GO:0018394	peptidyl-lysine acetylation	45	5	1.96	1737	1	0.00186	0.20666	0.00186	2.55102
GO:0048732	gland development	81	9	3.53	719	0.2189	5.9e-05	0.46779	5.9e-05	2.54958
GO:0008380	RNA splicing	144	16	6.28	338	0.05702	1.9e-13	0.0241	1.9e-13	2.54777
GO:0034655	nucleobase-containing compound catabolic process	72	8	3.14	644	0.1623	2.9e-06	0.74572	2.9e-06	2.54777
GO:0006936	muscle contraction	36	4	1.57	599	0.13374	0.00194	0.53158	0.00194	2.54777
GO:0043122	regulation of I-kappaB kinase/NF-kappaB signaling	36	4	1.57	1792	1	0.00331	0.28669	0.00331	2.54777
GO:0050900	leukocyte migration	36	4	1.57	1854	1	0.0063	0.80722	0.0063	2.54777
GO:0022402	cell cycle process	261	29	11.39	495	0.09387	< 1e-30	0.20523	1e-30	2.54609
GO:0051640	organelle localization	126	14	5.5	1448	1	2.1e-06	0.99188	2.1e-06	2.54545
GO:0010721	negative regulation of cell development	27	3	1.18	1458	1	3.2e-06	0.42573	3.2e-06	2.54237
GO:0019221	cytokine-mediated signaling pathway	54	6	2.36	681	0.17942	6.1e-05	0.08243	6.1e-05	2.54237
GO:0071902	positive regulation of protein serine/threonine kinase activity	54	6	2.36	1124	0.49168	9.9e-05	0.38023	9.9e-05	2.54237
GO:0048511	rhythmic process	54	6	2.36	594	0.13293	0.00012	0.34488	0.00012	2.54237
GO:0003007	heart morphogenesis	54	6	2.36	1036	0.39273	0.00184	0.32066	0.00184	2.54237
GO:0007186	G protein-coupled receptor signaling pathway	54	6	2.36	1818	1	0.00442	0.63631	0.00442	2.54237
GO:1903046	meiotic cell cycle process	27	3	1.18	1833	1	0.0051	0.33654	0.0051	2.54237
GO:0072330	monocarboxylic acid biosynthetic process	18	2	0.79	1669	1	0.00087	0.2868	0.00087	2.53165
GO:1905818	regulation of chromosome separation	18	2	0.79	542	0.10272	0.00207	0.50981	0.00207	2.53165
GO:0046907	intracellular transport	327	36	14.26	711	0.20053	5.1e-15	0.96634	5.1e-15	2.52454
GO:0071396	cellular response to lipid	91	10	3.97	1152	0.52189	2e-06	0.10012	2e-06	2.51889
GO:0007417	central nervous system development	164	18	7.15	1361	1	1.2e-10	0.62089	1.2e-10	2.51748
GO:0140014	mitotic nuclear division	73	8	3.18	1405	1	8.4e-08	0.19554	8.4e-08	2.51572
GO:0044270	cellular nitrogen compound catabolic process	73	8	3.18	1464	1	4.8e-06	0.76709	4.8e-06	2.51572
GO:0046700	heterocycle catabolic process	73	8	3.18	1465	1	4.8e-06	0.76709	4.8e-06	2.51572
GO:0032879	regulation of localization	474	52	20.68	340	0.05803	< 1e-30	0.51647	1e-30	2.51451
GO:0048856	anatomical structure development	904	99	39.43	1265	1	< 1e-30	< 1e-30	1e-30	2.51078
GO:0090068	positive regulation of cell cycle process	64	7	2.79	40	0.00131	1.9e-06	0.04893	1.9e-06	2.50896
GO:0016043	cellular component organization	1060	116	46.24	1258	1	< 1e-30	0.38937	1e-30	2.50865
GO:0009725	response to hormone	137	15	5.98	1346	1	2.7e-11	0.04336	2.7e-11	2.50836
GO:0051179	localization	888	97	38.74	1294	1	< 1e-30	0.95754	1e-30	2.50387
GO:0006259	DNA metabolic process	211	23	9.2	358	0.06506	5.1e-10	0.47065	5.1e-10	2.5
GO:0051962	positive regulation of nervous system development	55	6	2.4	527	0.10147	1.9e-05	0.92656	1.9e-05	2.5
GO:0032787	monocarboxylic acid metabolic process	55	6	2.4	1552	1	8e-05	0.07033	8e-05	2.5
GO:0008104	protein localization	477	52	20.81	1266	1	< 1e-30	0.99542	1e-30	2.4988
GO:0022603	regulation of anatomical structure morphogenesis	193	21	8.42	214	0.02783	4.1e-12	0.76995	4.1e-12	2.49406
GO:0051128	regulation of cellular component organization	515	56	22.47	1295	1	< 1e-30	0.63793	1e-30	2.49221
GO:0007051	spindle organization	46	5	2.01	699	0.19318	0.00082	0.62228	0.00082	2.48756
GO:0051271	negative regulation of cellular component movement	46	5	2.01	1862	1	0.0067	0.63893	0.0067	2.48756
GO:0007049	cell cycle	378	41	16.49	44	0.00143	< 1e-30	0.16638	1e-30	2.48636
GO:0051649	establishment of localization in cell	406	44	17.71	1251	1	< 1e-30	0.9924	1e-30	2.48447
GO:0032231	regulation of actin filament bundle assembly	37	4	1.61	1674	1	0.00092	0.51469	0.00092	2.48447
GO:0019932	second-messenger-mediated signaling	37	4	1.61	1695	1	0.00114	0.24121	0.00114	2.48447
GO:0045597	positive regulation of cell differentiation	157	17	6.85	703	0.19409	6e-10	0.76127	6e-10	2.48175
GO:0051130	positive regulation of cellular component organization	268	29	11.69	356	0.06469	4.6e-15	0.89847	4.6e-15	2.48075
GO:0071375	cellular response to peptide hormone stimulus	74	8	3.23	1408	1	1.2e-07	0.14777	1.2e-07	2.47678
GO:0019439	aromatic compound catabolic process	74	8	3.23	1476	1	7.8e-06	0.78786	7.8e-06	2.47678
GO:0030334	regulation of cell migration	167	18	7.28	190	0.02154	3.7e-10	0.98924	3.7e-10	2.47253
GO:0043086	negative regulation of catalytic activity	102	11	4.45	220	0.02909	0.00092	0.97521	0.00092	2.47191
GO:0072659	protein localization to plasma membrane	65	7	2.84	491	0.09228	4.9e-07	0.80155	4.9e-07	2.46479
GO:0001933	negative regulation of protein phosphorylation	65	7	2.84	1187	0.61635	0.00328	0.76933	0.00328	2.46479
GO:2001020	regulation of response to DNA damage stimulus	65	7	2.84	1853	1	0.00626	0.4263	0.00626	2.46479
GO:0032101	regulation of response to external stimulus	121	13	5.28	1390	1	2.6e-08	0.07301	2.6e-08	2.46212
GO:0061061	muscle structure development	121	13	5.28	689	0.18865	6.4e-08	0.4768	6.4e-08	2.46212
GO:0120035	regulation of plasma membrane bounded cell projection organization	149	16	6.5	1342	1	8e-12	0.72005	8e-12	2.46154
GO:1901653	cellular response to peptide	84	9	3.66	804	0.29744	7e-08	0.28283	7e-08	2.45902
GO:0015849	organic acid transport	28	3	1.22	1677	1	0.00093	0.16316	0.00093	2.45902
GO:0022618	ribonucleoprotein complex assembly	56	6	2.44	1682	1	0.00103	0.3691	0.00103	2.45902
GO:0061014	positive regulation of mRNA catabolic process	28	3	1.22	418	0.06951	0.00237	0.78739	0.00237	2.45902
GO:0008064	regulation of actin polymerization or depolymerization	56	6	2.44	238	0.03505	0.00274	0.37292	0.00274	2.45902
GO:0030832	regulation of actin filament length	56	6	2.44	1778	1	0.00274	0.37292	0.00274	2.45902
GO:0022612	gland morphogenesis	28	3	1.22	436	0.07567	0.00672	0.73751	0.00672	2.45902
GO:0048646	anatomical structure formation involved in morphogenesis	224	24	9.77	158	0.01635	1.1e-09	0.38805	1.1e-09	2.4565
GO:0060284	regulation of cell development	103	11	4.49	1341	1	6.4e-12	0.72283	6.4e-12	2.44989
GO:0006325	chromatin organization	159	17	6.94	425	0.07014	2e-05	0.61456	2e-05	2.44957
GO:0071840	cellular component organization or biogenesis	1115	119	48.64	1244	1	< 1e-30	0.43481	1e-30	2.44655
GO:0060322	head development	141	15	6.15	1386	1	7.9e-09	0.30666	7.9e-09	2.43902
GO:0031346	positive regulation of cell projection organization	94	10	4.1	1419	1	2.5e-07	0.80165	2.5e-07	2.43902
GO:0048568	embryonic organ development	94	10	4.1	974	0.36704	2.8e-07	0.33968	2.8e-07	2.43902
GO:0007018	microtubule-based movement	66	7	2.88	1079	0.43354	0.0036	0.9059	0.0036	2.43056
GO:2000026	regulation of multicellular organismal development	236	25	10.29	1326	1	1.8e-13	0.43615	1.8e-13	2.42954
GO:0071705	nitrogen compound transport	359	38	15.66	1239	1	< 1e-30	0.59609	1e-30	2.42656
GO:0051960	regulation of nervous system development	85	9	3.71	1364	1	1.7e-10	0.65104	1.7e-10	2.42588
GO:0007399	nervous system development	407	43	17.75	465	0.08529	< 1e-30	0.67608	1e-30	2.42254
GO:0009628	response to abiotic stimulus	161	17	7.02	232	0.03381	5.9e-09	0.0522	5.9e-09	2.42165
GO:0033036	macromolecule localization	540	57	23.56	1246	1	< 1e-30	0.99122	1e-30	2.41935
GO:0032502	developmental process	957	101	41.75	1264	1	< 1e-30	< 1e-30	1e-30	2.41916
GO:0043087	regulation of GTPase activity	95	10	4.14	161	0.01671	1e-09	0.99579	1e-09	2.41546
GO:0008285	negative regulation of cell population proliferation	114	12	4.97	122	0.00827	3.8e-07	0.70235	3.8e-07	2.41449
GO:0050877	nervous system process	114	12	4.97	513	0.09963	7.6e-06	0.3865	7.6e-06	2.41449
GO:0048869	cellular developmental process	665	70	29.01	1262	1	< 1e-30	0.04531	1e-30	2.41296
GO:0050767	regulation of neurogenesis	76	8	3.32	519	0.10089	3.1e-09	0.72087	3.1e-09	2.40964
GO:1990138	neuron projection extension	38	4	1.66	77	0.00442	1.7e-06	0.30255	1.7e-06	2.40964
GO:1901361	organic cyclic compound catabolic process	76	8	3.32	1450	1	2.1e-06	0.73669	2.1e-06	2.40964
GO:0060996	dendritic spine development	38	4	1.66	1164	0.54557	7.7e-05	0.99181	7.7e-05	2.40964
GO:0070371	ERK1 and ERK2 cascade	57	6	2.49	1551	1	7.9e-05	0.60605	7.9e-05	2.40964
GO:0015931	nucleobase-containing compound transport	57	6	2.49	528	0.10151	0.00016	0.82218	0.00016	2.40964
GO:1901888	regulation of cell junction assembly	38	4	1.66	726	0.22219	0.00016	0.63064	0.00016	2.40964
GO:0051235	maintenance of location	57	6	2.49	1588	1	0.00021	0.21471	0.00021	2.40964
GO:0016358	dendrite development	76	8	3.32	159	0.01664	0.00035	0.99916	0.00035	2.40964
GO:0055088	lipid homeostasis	19	2	0.83	1652	1	0.00062	0.08479	0.00062	2.40964
GO:1904035	regulation of epithelial cell apoptotic process	19	2	0.83	793	0.27751	0.00098	0.25507	0.00098	2.40964
GO:0007369	gastrulation	38	4	1.66	200	0.02429	0.00119	0.39874	0.00119	2.40964
GO:0030308	negative regulation of cell growth	38	4	1.66	270	0.04464	0.00682	0.52776	0.00682	2.40964
GO:0002376	immune system process	343	36	14.96	1302	1	1.1e-16	0.50157	1.1e-16	2.40642
GO:0035556	intracellular signal transduction	477	50	20.81	10	4.8e-05	< 1e-30	0.21225	1e-30	2.40269
GO:0030154	cell differentiation	659	69	28.75	694	0.19073	< 1e-30	0.04622	1e-30	2.4
GO:0006886	intracellular protein transport	172	18	7.5	188	0.02111	8.7e-09	0.99811	8.7e-09	2.4
GO:0045787	positive regulation of cell cycle	86	9	3.75	461	0.08342	6.2e-07	0.20511	6.2e-07	2.4
GO:0031344	regulation of cell projection organization	153	16	6.67	1343	1	8.1e-12	0.69663	8.1e-12	2.3988
GO:0006401	RNA catabolic process	67	7	2.92	521	0.10121	7.8e-06	0.85658	7.8e-06	2.39726
GO:0071496	cellular response to external stimulus	67	7	2.92	1573	1	0.00014	0.91063	0.00014	2.39726
GO:0040008	regulation of growth	134	14	5.85	1350	1	5e-11	0.08831	5e-11	2.39316
GO:0051028	mRNA transport	48	5	2.09	720	0.21921	0.00099	0.83889	0.00099	2.39234
GO:0046822	regulation of nucleocytoplasmic transport	48	5	2.09	194	0.02317	0.00245	0.7911	0.00245	2.39234
GO:0006473	protein acetylation	48	5	2.09	1863	1	0.00675	0.28738	0.00675	2.39234
GO:0040017	positive regulation of locomotion	115	12	5.02	1434	1	7.5e-07	0.92547	7.5e-07	2.39044
GO:0032386	regulation of intracellular transport	96	10	4.19	1504	1	2.3e-05	0.64764	2.3e-05	2.38663
GO:0018105	peptidyl-serine phosphorylation	77	8	3.36	30	0.00082	6.3e-07	0.89566	6.3e-07	2.38095
GO:0018209	peptidyl-serine modification	77	8	3.36	1433	1	6.3e-07	0.89566	6.3e-07	2.38095
GO:0051641	cellular localization	541	56	23.6	1250	1	< 1e-30	0.99871	1e-30	2.37288
GO:0051146	striated muscle cell differentiation	58	6	2.53	1528	1	4.2e-05	0.60351	4.2e-05	2.37154
GO:0007265	Ras protein signal transduction	87	9	3.8	1057	0.41115	1.7e-06	0.73635	1.7e-06	2.36842
GO:0022008	neurogenesis	320	33	13.96	1248	1	< 1e-30	0.73909	1e-30	2.3639
GO:0016192	vesicle-mediated transport	262	27	11.43	885	0.32856	< 1e-30	0.35687	1e-30	2.3622
GO:0031099	regeneration	29	3	1.27	660	0.16481	0.00024	0.14065	0.00024	2.3622
GO:0035195	miRNA-mediated gene silencing	29	3	1.27	1690	1	0.00111	0.21843	0.00111	2.3622
GO:0038127	ERBB signaling pathway	29	3	1.27	1805	1	0.00375	0.13758	0.00375	2.3622
GO:0008284	positive regulation of cell population proliferation	165	17	7.2	26	0.00062	3.8e-07	0.36831	3.8e-07	2.36111
GO:0051056	regulation of small GTPase mediated signal transduction	68	7	2.97	748	0.24758	4.5e-05	0.72946	4.5e-05	2.3569
GO:0007059	chromosome segregation	78	8	3.4	1477	1	7.9e-06	0.18341	7.9e-06	2.35294
GO:0032412	regulation of ion transmembrane transporter activity	39	4	1.7	1848	1	0.006	0.24706	0.006	2.35294
GO:0080134	regulation of response to stress	234	24	10.21	499	0.09586	2e-10	0.06777	2e-10	2.35064
GO:0008219	cell death	400	41	17.45	1305	1	1.1e-16	0.38755	1.1e-16	2.34957
GO:0050793	regulation of developmental process	449	46	19.59	673	0.16896	< 1e-30	0.10261	1e-30	2.34814
GO:0071702	organic substance transport	391	40	17.06	1237	1	< 1e-30	0.49975	1e-30	2.34467
GO:0022411	cellular component disassembly	88	9	3.84	1182	0.58607	7.2e-07	0.2157	7.2e-07	2.34375
GO:1901135	carbohydrate derivative metabolic process	88	9	3.84	428	0.0732	2e-06	0.32472	2e-06	2.34375
GO:0051716	cellular response to stimulus	989	101	43.14	64	0.00305	< 1e-30	< 1e-30	1e-30	2.34121
GO:0071345	cellular response to cytokine stimulus	137	14	5.98	1110	0.4648	5.5e-12	0.1944	5.5e-12	2.34114
GO:0030030	cell projection organization	294	30	12.82	496	0.09391	< 1e-30	0.85229	1e-30	2.34009
GO:0009150	purine ribonucleotide metabolic process	49	5	2.14	1499	1	2e-05	0.02727	2e-05	2.33645
GO:0045926	negative regulation of growth	49	5	2.14	1789	1	0.00314	0.35038	0.00314	2.33645
GO:0009987	cellular process	2003	204	87.37	1207	1	< 1e-30	< 1e-30	1e-30	2.3349
GO:0007165	signal transduction	756	77	32.98	20	0.00041	< 1e-30	< 1e-30	1e-30	2.33475
GO:0071826	ribonucleoprotein complex subunit organization	59	6	2.57	1633	1	0.00048	0.35245	0.00048	2.33463
GO:0045595	regulation of cell differentiation	275	28	12	1293	1	< 1e-30	0.50819	1e-30	2.33333
GO:0006955	immune response	177	18	7.72	580	0.12823	3.4e-07	0.43025	3.4e-07	2.33161
GO:0043412	macromolecule modification	649	66	28.31	1210	1	< 1e-30	0.15078	1e-30	2.33133
GO:0051272	positive regulation of cellular component movement	118	12	5.15	690	0.18941	1.5e-06	0.92578	1.5e-06	2.3301
GO:0050896	response to stimulus	1094	111	47.72	1285	1	< 1e-30	< 1e-30	1e-30	2.32607
GO:0008150	biological_process	2129	216	92.87	1	6.4e-11	< 1e-30	< 1e-30	1e-30	2.32583
GO:0006260	DNA replication	69	7	3.01	1829	1	0.00493	0.77137	0.00493	2.32558
GO:0000165	MAPK cascade	148	15	6.46	640	0.15911	2.3e-10	0.10213	2.3e-10	2.32198
GO:0051050	positive regulation of transport	168	17	7.33	1392	1	2.6e-08	0.23518	2.6e-08	2.31924
GO:0042326	negative regulation of phosphorylation	79	8	3.45	778	0.27315	0.00019	0.38854	0.00019	2.31884
GO:1903507	negative regulation of nucleic acid-templated transcription	267	27	11.65	1327	1	2.4e-13	0.44909	2.4e-13	2.3176
GO:0045892	negative regulation of transcription, DNA-templated	267	27	11.65	654	0.16444	2.4e-13	0.44909	2.4e-13	2.3176
GO:1902679	negative regulation of RNA biosynthetic process	267	27	11.65	1328	1	2.4e-13	0.44909	2.4e-13	2.3176
GO:0006913	nucleocytoplasmic transport	109	11	4.75	1422	1	3.5e-07	0.94521	3.5e-07	2.31579
GO:0051169	nuclear transport	109	11	4.75	1423	1	3.5e-07	0.94521	3.5e-07	2.31579
GO:0098542	defense response to other organism	119	12	5.19	1457	1	3.2e-06	0.2645	3.2e-06	2.31214
GO:0006396	RNA processing	278	28	12.13	1349	1	2.8e-11	0.27039	2.8e-11	2.30833
GO:0001944	vasculature development	149	15	6.5	251	0.03577	4.9e-07	0.38644	4.9e-07	2.30769
GO:0044092	negative regulation of molecular function	169	17	7.37	581	0.12868	2.3e-06	0.87349	2.3e-06	2.30665
GO:0120036	plasma membrane bounded cell projection organization	289	29	12.61	1231	1	< 1e-30	0.81822	1e-30	2.29976
GO:0065007	biological regulation	1605	161	70.01	1267	1	< 1e-30	< 1e-30	1e-30	2.29967
GO:0030307	positive regulation of cell growth	40	4	1.74	431	0.0752	2.2e-05	0.06402	2.2e-05	2.29885
GO:0030178	negative regulation of Wnt signaling pathway	40	4	1.74	1582	1	0.00019	0.32857	0.00019	2.29885
GO:0043542	endothelial cell migration	40	4	1.74	1619	1	0.0004	0.3394	0.0004	2.29885
GO:1905952	regulation of lipid localization	20	2	0.87	543	0.10275	0.00065	0.09749	0.00065	2.29885
GO:0048704	embryonic skeletal system morphogenesis	20	2	0.87	1687	1	0.00107	0.28982	0.00107	2.29885
GO:1902117	positive regulation of organelle assembly	20	2	0.87	633	0.15759	0.00522	0.98824	0.00522	2.29885
GO:0061351	neural precursor cell proliferation	40	4	1.74	1906	1	0.00891	0.86388	0.00891	2.29885
GO:0022898	regulation of transmembrane transporter activity	40	4	1.74	1910	1	0.00923	0.19729	0.00923	2.29885
GO:0006139	nucleobase-containing compound metabolic process	938	94	40.92	1275	1	< 1e-30	0.00181	1e-30	2.29717
GO:0051234	establishment of localization	649	65	28.31	1215	1	< 1e-30	0.77279	1e-30	2.29601
GO:1904951	positive regulation of establishment of protein localization	70	7	3.05	648	0.16297	0.00066	0.45112	0.00066	2.29508
GO:0048598	embryonic morphogenesis	120	12	5.23	1414	1	2.1e-07	0.3581	2.1e-07	2.29446
GO:0030833	regulation of actin filament polymerization	50	5	2.18	1874	1	0.00738	0.41641	0.00738	2.29358
GO:0042127	regulation of cell population proliferation	280	28	12.21	1333	1	8.2e-13	0.27851	8.2e-13	2.2932
GO:0043408	regulation of MAPK cascade	130	13	5.67	1411	1	1.5e-07	0.3982	1.5e-07	2.29277
GO:0070925	organelle assembly	160	16	6.98	1402	1	6.5e-08	0.91384	6.5e-08	2.29226
GO:1990778	protein localization to cell periphery	80	8	3.49	1431	1	5e-07	0.94317	5e-07	2.29226
GO:0001501	skeletal system development	80	8	3.49	1718	1	0.0015	0.58915	0.0015	2.29226
GO:0033554	cellular response to stress	380	38	16.58	1312	1	3.9e-15	0.0814	3.9e-15	2.29192
GO:0030335	positive regulation of cell migration	110	11	4.8	576	0.12268	2.3e-06	0.93099	2.3e-06	2.29167
GO:0000280	nuclear division	90	9	3.93	1391	1	2.6e-08	0.11562	2.6e-08	2.29008
GO:0021953	central nervous system neuron differentiation	30	3	1.31	1480	1	9.2e-06	0.89583	9.2e-06	2.29008
GO:0098813	nuclear chromosome segregation	60	6	2.62	1502	1	2.3e-05	0.11615	2.3e-05	2.29008
GO:0035194	post-transcriptional gene silencing by RNA	30	3	1.31	1650	1	0.0006	0.1792	0.0006	2.29008
GO:0090630	activation of GTPase activity	30	3	1.31	490	0.08914	0.00101	0.6175	0.00101	2.29008
GO:0043534	blood vessel endothelial cell migration	30	3	1.31	1746	1	0.00208	0.36762	0.00208	2.29008
GO:0061138	morphogenesis of a branching epithelium	30	3	1.31	538	0.10246	0.00677	0.91029	0.00677	2.29008
GO:0010594	regulation of endothelial cell migration	30	3	1.31	1869	1	0.00703	0.28409	0.00703	2.29008
GO:0036211	protein modification process	611	61	26.65	1247	1	< 1e-30	0.13529	1e-30	2.28893
GO:0006464	cellular protein modification process	611	61	26.65	1055	0.40576	< 1e-30	0.13529	1e-30	2.28893
GO:0090304	nucleic acid metabolic process	892	89	38.91	1211	1	< 1e-30	0.14501	1e-30	2.28733
GO:0050794	regulation of cellular process	1515	151	66.09	155	0.01447	< 1e-30	< 1e-30	1e-30	2.28476
GO:0046483	heterocycle metabolic process	945	94	41.22	1230	1	< 1e-30	0.02088	1e-30	2.28045
GO:0009887	animal organ morphogenesis	171	17	7.46	864	0.31525	5.1e-08	0.09512	5.1e-08	2.27882
GO:0050789	regulation of biological process	1560	155	68.05	1274	1	< 1e-30	< 1e-30	1e-30	2.27774
GO:1901699	cellular response to nitrogen compound	141	14	6.15	86	0.00543	6.2e-08	0.28177	6.2e-08	2.27642
GO:0034330	cell junction organization	151	15	6.59	1379	1	2.8e-09	0.99062	2.8e-09	2.27618
GO:0080135	regulation of cellular response to stress	151	15	6.59	1054	0.40529	1.3e-07	0.09309	1.3e-07	2.27618
GO:0006725	cellular aromatic compound metabolic process	947	94	41.31	1206	1	< 1e-30	0.00799	1e-30	2.27548
GO:0012501	programmed cell death	373	37	16.27	88	0.00576	2.2e-14	0.44905	2.2e-14	2.27412
GO:0048522	positive regulation of cellular process	958	95	41.79	1278	1	< 1e-30	0.72267	1e-30	2.27327
GO:0030261	chromosome condensation	10	1	0.44	814	0.30393	0.00016	0.03078	0.00016	2.27273
GO:0050795	regulation of behavior	10	1	0.44	815	0.30393	0.00888	0.15753	0.00888	2.27273
GO:0060341	regulation of cellular localization	212	21	9.25	352	0.06365	6.4e-12	0.35801	6.4e-12	2.27027
GO:0048583	regulation of response to stimulus	596	59	26	1276	1	< 1e-30	7.8e-08	1e-30	2.26923
GO:0099177	regulation of trans-synaptic signaling	81	8	3.53	1631	1	0.00046	0.93917	0.00046	2.26629
GO:0050804	modulation of chemical synaptic transmission	81	8	3.53	60	0.00259	0.00046	0.93917	0.00046	2.26629
GO:0006950	response to stress	567	56	24.73	1269	1	< 1e-30	0.09427	1e-30	2.26446
GO:0048878	chemical homeostasis	142	14	6.19	219	0.02866	1.6e-09	0.015	1.6e-09	2.26171
GO:0051253	negative regulation of RNA metabolic process	305	30	13.3	1313	1	6.4e-15	0.50398	6.4e-15	2.25564
GO:0043543	protein acylation	51	5	2.22	1797	1	0.00348	0.27249	0.00348	2.25225
GO:0065008	regulation of biological quality	550	54	23.99	1153	0.52615	< 1e-30	0.44804	1e-30	2.25094
GO:2000147	positive regulation of cell motility	112	11	4.89	1438	1	1e-06	0.93007	1e-06	2.24949
GO:0010628	positive regulation of gene expression	204	20	8.9	14	0.00013	2.3e-11	0.55314	2.3e-11	2.24719
GO:0065009	regulation of molecular function	470	46	20.5	1268	1	< 1e-30	0.75323	1e-30	2.2439
GO:0010638	positive regulation of organelle organization	143	14	6.24	1421	1	3.2e-07	0.96498	3.2e-07	2.24359
GO:0042221	response to chemical	563	55	24.56	1232	1	< 1e-30	1.7e-09	1e-30	2.23941
GO:0032880	regulation of protein localization	215	21	9.38	84	0.00484	1.2e-15	0.44182	1.2e-15	2.23881
GO:1901360	organic cyclic compound metabolic process	963	94	42.01	1212	1	< 1e-30	1.8e-06	1e-30	2.23756
GO:0007623	circadian rhythm	41	4	1.79	1138	0.51202	0.00022	0.1255	0.00022	2.23464
GO:0007249	I-kappaB kinase/NF-kappaB signaling	41	4	1.79	1706	1	0.00136	0.15918	0.00136	2.23464
GO:0048705	skeletal system morphogenesis	41	4	1.79	877	0.32627	0.00206	0.22377	0.00206	2.23464
GO:0030324	lung development	41	4	1.79	1125	0.49423	0.00841	0.54792	0.00841	2.23464
GO:0048519	negative regulation of biological process	924	90	40.31	1283	1	< 1e-30	< 1e-30	1e-30	2.2327
GO:0050790	regulation of catalytic activity	339	33	14.79	150	0.01422	1.2e-14	0.97038	1.2e-14	2.23124
GO:0030111	regulation of Wnt signaling pathway	72	7	3.14	587	0.1327	6.1e-05	0.72926	6.1e-05	2.2293
GO:0034613	cellular protein localization	350	34	15.27	615	0.14418	< 1e-30	0.99794	1e-30	2.22659
GO:0044237	cellular metabolic process	1433	139	62.51	1225	1	< 1e-30	< 1e-30	1e-30	2.22364
GO:0034641	cellular nitrogen compound metabolic process	1021	99	44.54	65	0.00319	< 1e-30	< 1e-30	1e-30	2.22272
GO:0044260	cellular macromolecule metabolic process	949	92	41.4	304	0.04816	< 1e-30	0.07793	1e-30	2.22222
GO:0008283	cell population proliferation	330	32	14.4	1334	1	8.8e-13	0.50492	8.8e-13	2.22222
GO:0051276	chromosome organization	258	25	11.25	1371	1	7.6e-10	0.54837	7.6e-10	2.22222
GO:0016441	post-transcriptional gene silencing	31	3	1.35	1605	1	0.00032	0.28387	0.00032	2.22222
GO:0006405	RNA export from nucleus	31	3	1.35	1791	1	0.00331	0.31287	0.00331	2.22222
GO:0009896	positive regulation of catabolic process	124	12	5.41	1410	1	1.5e-07	0.27677	1.5e-07	2.21811
GO:0007154	cell communication	817	79	35.64	1261	1	< 1e-30	3.8e-08	1e-30	2.21661
GO:0010941	regulation of cell death	331	32	14.44	494	0.09351	2.2e-13	0.43307	2.2e-13	2.21607
GO:0023052	signaling	807	78	35.2	1236	1	< 1e-30	2.6e-05	1e-30	2.21591
GO:0070727	cellular macromolecule localization	352	34	15.35	1288	1	< 1e-30	0.99787	1e-30	2.21498
GO:0006810	transport	622	60	27.13	1217	1	< 1e-30	0.59255	1e-30	2.21157
GO:0048699	generation of neurons	280	27	12.21	1287	1	< 1e-30	0.99842	1e-30	2.2113
GO:0048518	positive regulation of biological process	1006	97	43.88	1281	1	< 1e-30	0.23006	1e-30	2.21057
GO:0034329	cell junction assembly	83	8	3.62	1472	1	5.9e-06	0.98114	5.9e-06	2.20994
GO:0006807	nitrogen compound metabolic process	1361	131	59.37	1220	1	< 1e-30	< 1e-30	1e-30	2.2065
GO:0016070	RNA metabolic process	800	77	34.9	1254	1	< 1e-30	0.12999	1e-30	2.2063
GO:0008152	metabolic process	1488	143	64.91	1253	1	< 1e-30	0.00018	1e-30	2.20305
GO:0050769	positive regulation of neurogenesis	52	5	2.27	872	0.32549	3e-05	0.94548	3e-05	2.20264
GO:0071692	protein localization to extracellular region	52	5	2.27	1823	1	0.0047	0.18149	0.0047	2.20264
GO:0009306	protein secretion	52	5	2.27	111	0.00763	0.0047	0.18149	0.0047	2.20264
GO:0035592	establishment of protein localization to extracellular region	52	5	2.27	1824	1	0.0047	0.18149	0.0047	2.20264
GO:0044093	positive regulation of molecular function	302	29	13.17	712	0.20673	3.3e-16	0.90659	3.3e-16	2.20197
GO:0009991	response to extracellular stimulus	73	7	3.18	1437	1	9.7e-07	0.5224	9.7e-07	2.20126
GO:0009893	positive regulation of metabolic process	677	65	29.53	1234	1	< 1e-30	0.51509	1e-30	2.20115
GO:0051173	positive regulation of nitrogen compound metabolic process	594	57	25.91	558	0.1117	< 1e-30	0.45065	1e-30	2.19992
GO:0048666	neuron development	230	22	10.03	686	0.1841	1.1e-16	0.99004	1.1e-16	2.19342
GO:0045596	negative regulation of cell differentiation	115	11	5.02	1151	0.52159	1.1e-09	0.40144	1.1e-09	2.19124
GO:0007167	enzyme linked receptor protein signaling pathway	178	17	7.76	233	0.03391	2.2e-12	0.30093	2.2e-12	2.19072
GO:0051129	negative regulation of cellular component organization	157	15	6.85	1109	0.46426	2.5e-11	0.59987	2.5e-11	2.18978
GO:0045935	positive regulation of nucleobase-containing compound metabolic process	398	38	17.36	345	0.06205	< 1e-30	0.22732	1e-30	2.18894
GO:0006915	apoptotic process	367	35	16.01	559	0.1138	4.9e-14	0.39915	4.9e-14	2.18613
GO:0051321	meiotic cell cycle	42	4	1.83	1061	0.41634	3.8e-05	0.02787	3.8e-05	2.18579
GO:0050792	regulation of viral process	42	4	1.83	1600	1	0.00029	0.91576	0.00029	2.18579
GO:0000723	telomere maintenance	42	4	1.83	1688	1	0.00109	0.57766	0.00109	2.18579
GO:0009267	cellular response to starvation	42	4	1.83	1811	1	0.00418	0.60209	0.00418	2.18579
GO:0030323	respiratory tube development	42	4	1.83	1836	1	0.00534	0.51168	0.00534	2.18579
GO:0009607	response to biotic stimulus	168	16	7.33	391	0.06688	9.5e-08	0.10358	9.5e-08	2.18281
GO:0043170	macromolecule metabolic process	1355	129	59.11	1219	1	< 1e-30	1.2e-05	1e-30	2.18237
GO:0006403	RNA localization	63	6	2.75	807	0.30018	9e-05	0.87229	9e-05	2.18182
GO:0031175	neuron projection development	221	21	9.64	628	0.15523	1.4e-15	0.99119	1.4e-15	2.17842
GO:1901701	cellular response to oxygen-containing compound	211	20	9.2	176	0.01914	2.3e-13	0.166	2.3e-13	2.17391
GO:1903829	positive regulation of protein localization	116	11	5.06	973	0.3667	1.5e-08	0.46256	1.5e-08	2.17391
GO:0014013	regulation of gliogenesis	21	2	0.92	795	0.27759	6.9e-05	0.51054	6.9e-05	2.17391
GO:0050772	positive regulation of axonogenesis	21	2	0.92	796	0.27759	0.00042	0.26949	0.00042	2.17391
GO:0071805	potassium ion transmembrane transport	21	2	0.92	1719	1	0.0015	0.29413	0.0015	2.17391
GO:0031062	positive regulation of histone methylation	21	2	0.92	884	0.3279	0.0031	0.936	0.0031	2.17391
GO:0010604	positive regulation of macromolecule metabolic process	635	60	27.7	1228	1	< 1e-30	0.57244	1e-30	2.16606
GO:0031669	cellular response to nutrient levels	53	5	2.31	873	0.32553	0.0002	0.63973	0.0002	2.1645
GO:0051236	establishment of RNA localization	53	5	2.31	1610	1	0.00036	0.89295	0.00036	2.1645
GO:0050657	nucleic acid transport	53	5	2.31	1611	1	0.00036	0.89295	0.00036	2.1645
GO:0050658	RNA transport	53	5	2.31	1612	1	0.00036	0.89295	0.00036	2.1645
GO:0044238	primary metabolic process	1400	132	61.07	1226	1	< 1e-30	< 1e-30	1e-30	2.16145
GO:0045934	negative regulation of nucleobase-containing compound metabolic process	329	31	14.35	1322	1	4.1e-14	0.60844	4.1e-14	2.16028
GO:1901564	organonitrogen compound metabolic process	892	84	38.91	1277	1	< 1e-30	0.03966	1e-30	2.15883
GO:0045859	regulation of protein kinase activity	117	11	5.1	515	0.10015	7.6e-08	0.71824	7.6e-08	2.15686
GO:0033993	response to lipid	117	11	5.1	1435	1	7.8e-07	0.04996	7.8e-07	2.15686
GO:0019725	cellular homeostasis	117	11	5.1	87	0.00544	1.4e-06	0.12003	1.4e-06	2.15686
GO:0042176	regulation of protein catabolic process	85	8	3.71	646	0.16262	8.7e-06	0.35524	8.7e-06	2.15633
GO:0050808	synapse organization	85	8	3.71	977	0.36944	5.2e-05	0.81071	5.2e-05	2.15633
GO:0019538	protein metabolic process	831	78	36.25	677	0.17131	< 1e-30	0.06303	1e-30	2.15172
GO:0071704	organic substance metabolic process	1449	136	63.21	1238	1	< 1e-30	< 1e-30	1e-30	2.15156
GO:0070887	cellular response to chemical stimulus	469	44	20.46	746	0.24562	< 1e-30	0.00175	1e-30	2.15054
GO:0032103	positive regulation of response to external stimulus	64	6	2.79	110	0.00757	3.8e-06	0.07258	3.8e-06	2.15054
GO:0033044	regulation of chromosome organization	64	6	2.79	1517	1	3.1e-05	0.96463	3.1e-05	2.15054
GO:0002244	hematopoietic progenitor cell differentiation	32	3	1.4	547	0.10352	0.00229	0.93734	0.00229	2.14286
GO:0071222	cellular response to lipopolysaccharide	32	3	1.4	616	0.14448	0.00541	0.17512	0.00541	2.14286
GO:0071219	cellular response to molecule of bacterial origin	32	3	1.4	1837	1	0.00541	0.17512	0.00541	2.14286
GO:0031400	negative regulation of protein modification process	107	10	4.67	1077	0.43107	0.00273	0.63771	0.00273	2.14133
GO:1901698	response to nitrogen compound	193	18	8.42	1383	1	4.2e-09	0.39624	4.2e-09	2.13777
GO:0010558	negative regulation of macromolecule biosynthetic process	322	30	14.05	1300	1	1.1e-16	0.49604	1.1e-16	2.13523
GO:0009966	regulation of signal transduction	484	45	21.11	919	0.33349	< 1e-30	1.5e-06	1e-30	2.13169
GO:0051252	regulation of RNA metabolic process	635	59	27.7	1208	1	< 1e-30	0.16331	1e-30	2.12996
GO:0048584	positive regulation of response to stimulus	323	30	14.09	682	0.17978	5.1e-14	0.39335	5.1e-14	2.12917
GO:0001568	blood vessel development	140	13	6.11	577	0.12598	3.3e-07	0.27553	3.3e-07	2.12766
GO:1903313	positive regulation of mRNA metabolic process	43	4	1.88	1569	1	0.00012	0.64824	0.00012	2.12766
GO:0090257	regulation of muscle system process	43	4	1.88	1578	1	0.00017	0.64498	0.00017	2.12766
GO:0032200	telomere organization	43	4	1.88	1644	1	0.00056	0.516	0.00056	2.12766
GO:0007030	Golgi organization	43	4	1.88	359	0.06518	0.00198	0.24275	0.00198	2.12766
GO:0042981	regulation of apoptotic process	302	28	13.17	223	0.03029	1.7e-11	0.42967	1.7e-11	2.12604
GO:0044267	cellular protein metabolic process	800	74	34.9	1221	1	< 1e-30	0.08736	1e-30	2.12034
GO:0044403	biological process involved in symbiotic interaction	54	5	2.36	1770	1	0.00264	0.09508	0.00264	2.11864
GO:0060828	regulation of canonical Wnt signaling pathway	54	5	2.36	1852	1	0.00611	0.82052	0.00611	2.11864
GO:0051336	regulation of hydrolase activity	184	17	8.03	133	0.0108	6e-09	0.99119	6e-09	2.11706
GO:0050673	epithelial cell proliferation	65	6	2.84	753	0.24851	0.00044	0.11778	0.00044	2.11268
GO:0051222	positive regulation of protein transport	65	6	2.84	1743	1	0.00196	0.47812	0.00196	2.11268
GO:0051093	negative regulation of developmental process	152	14	6.63	754	0.24911	6e-11	0.68854	6e-11	2.11161
GO:0051707	response to other organism	163	15	7.11	1399	1	4.7e-08	0.11747	4.7e-08	2.1097
GO:0043207	response to external biotic stimulus	163	15	7.11	1400	1	4.7e-08	0.11747	4.7e-08	2.1097
GO:0044281	small molecule metabolic process	163	15	7.11	1424	1	3.6e-07	0.19848	3.6e-07	2.1097
GO:0048523	negative regulation of cellular process	859	79	37.47	1279	1	< 1e-30	< 1e-30	1e-30	2.10835
GO:0048285	organelle fission	98	9	4.27	1394	1	3.5e-08	0.08699	3.5e-08	2.10773
GO:1901652	response to peptide	98	9	4.27	1397	1	4.1e-08	0.37037	4.1e-08	2.10773
GO:0009056	catabolic process	370	34	16.14	348	0.06311	< 1e-30	0.22359	1e-30	2.10657
GO:0043067	regulation of programmed cell death	305	28	13.3	1345	1	1.7e-11	0.43946	1.7e-11	2.10526
GO:0043434	response to peptide hormone	87	8	3.8	1398	1	4.4e-08	0.12006	4.4e-08	2.10526
GO:0022604	regulation of cell morphogenesis	87	8	3.8	582	0.12917	8.2e-06	0.69827	8.2e-06	2.10526
GO:0031327	negative regulation of cellular biosynthetic process	327	30	14.26	1306	1	1.1e-16	0.64998	1.1e-16	2.10379
GO:0031399	regulation of protein modification process	327	30	14.26	1320	1	1.9e-14	0.81487	1.9e-14	2.10379
GO:0035295	tube development	218	20	9.51	631	0.15716	8.1e-11	0.36598	8.1e-11	2.10305
GO:0019219	regulation of nucleobase-containing compound metabolic process	698	64	30.45	1260	1	< 1e-30	0.09962	1e-30	2.10181
GO:1901575	organic substance catabolic process	307	28	13.39	1282	1	< 1e-30	0.25272	1e-30	2.09111
GO:0051172	negative regulation of nitrogen compound metabolic process	472	43	20.59	1291	1	< 1e-30	0.36968	1e-30	2.08839
GO:0031325	positive regulation of cellular metabolic process	627	57	27.35	688	0.1882	< 1e-30	0.5805	1e-30	2.0841
GO:0034097	response to cytokine	154	14	6.72	1337	1	2.5e-12	0.27928	2.5e-12	2.08333
GO:0000380	alternative mRNA splicing, via spliceosome	33	3	1.44	1531	1	4.9e-05	0.13003	4.9e-05	2.08333
GO:0031347	regulation of defense response	77	7	3.36	1572	1	0.00014	0.55131	0.00014	2.08333
GO:0045685	regulation of glial cell differentiation	11	1	0.48	886	0.32872	0.00041	0.08986	0.00041	2.08333
GO:0046578	regulation of Ras protein signal transduction	55	5	2.4	1681	1	0.00102	0.55569	0.00102	2.08333
GO:0010464	regulation of mesenchymal cell proliferation	11	1	0.48	887	0.32872	0.0011	0.7315	0.0011	2.08333
GO:0060606	tube closure	33	3	1.44	1703	1	0.0013	0.29511	0.0013	2.08333
GO:0001843	neural tube closure	33	3	1.44	557	0.11104	0.0013	0.29511	0.0013	2.08333
GO:0006096	glycolytic process	22	2	0.96	809	0.30325	0.00254	0.04528	0.00254	2.08333
GO:0006757	ATP generation from ADP	22	2	0.96	1764	1	0.00254	0.04528	0.00254	2.08333
GO:0032204	regulation of telomere maintenance	33	3	1.44	539	0.1025	0.00294	0.67259	0.00294	2.08333
GO:0022613	ribonucleoprotein complex biogenesis	121	11	5.28	1803	1	0.0037	0.74678	0.0037	2.08333
GO:0051703	biological process involved in intraspecies interaction between organisms	11	1	0.48	1819	1	0.0045	0.12548	0.0045	2.08333
GO:0035176	social behavior	11	1	0.48	888	0.32872	0.0045	0.12548	0.0045	2.08333
GO:0062012	regulation of small molecule metabolic process	55	5	2.4	1822	1	0.00465	0.54222	0.00465	2.08333
GO:0086001	cardiac muscle cell action potential	11	1	0.48	889	0.32872	0.00501	0.78081	0.00501	2.08333
GO:0098876	vesicle-mediated transport to the plasma membrane	33	3	1.44	1849	1	0.00602	0.40407	0.00602	2.08333
GO:0043903	regulation of biological process involved in symbiotic interaction	11	1	0.48	1916	1	0.00951	0.22653	0.00951	2.08333
GO:0052372	modulation by symbiont of entry into host	11	1	0.48	890	0.32872	0.00951	0.22653	0.00951	2.08333
GO:0007166	cell surface receptor signaling pathway	375	34	16.36	1176	0.57104	< 1e-30	0.15952	1e-30	2.07824
GO:0034654	nucleobase-containing compound biosynthetic process	618	56	26.96	1256	1	< 1e-30	0.30162	1e-30	2.07715
GO:0009057	macromolecule catabolic process	254	23	11.08	801	0.28725	1.6e-15	0.51766	1.6e-15	2.07581
GO:0009891	positive regulation of biosynthetic process	387	35	16.88	492	0.09292	1.1e-15	0.55355	1.1e-15	2.07346
GO:0090066	regulation of anatomical structure size	111	10	4.84	1415	1	2.3e-07	0.43753	2.3e-07	2.06612
GO:0009890	negative regulation of biosynthetic process	333	30	14.53	1303	1	1.1e-16	0.59056	1.1e-16	2.06469
GO:0140694	non-membrane-bounded organelle assembly	89	8	3.88	971	0.35914	3.2e-05	0.9618	3.2e-05	2.06186
GO:0006796	phosphate-containing compound metabolic process	456	41	19.89	1292	1	< 1e-30	0.3183	1e-30	2.06134
GO:0018130	heterocycle biosynthetic process	623	56	27.18	1218	1	< 1e-30	0.30488	1e-30	2.06034
GO:0070997	neuron death	78	7	3.4	1887	1	0.00807	0.55518	0.00807	2.05882
GO:0006793	phosphorus metabolic process	457	41	19.93	1289	1	< 1e-30	0.25366	1e-30	2.0572
GO:0019438	aromatic compound biosynthetic process	625	56	27.26	1243	1	< 1e-30	0.31781	1e-30	2.05429
GO:0051247	positive regulation of protein metabolic process	313	28	13.65	1299	1	1.1e-16	0.53799	1.1e-16	2.05128
GO:0043066	negative regulation of apoptotic process	190	17	8.29	271	0.04472	1.8e-06	0.27647	1.8e-06	2.05066
GO:0016197	endosomal transport	56	5	2.44	672	0.16813	6.3e-06	0.27919	6.3e-06	2.04918
GO:0050678	regulation of epithelial cell proliferation	56	5	2.44	700	0.19347	0.00206	0.1203	0.00206	2.04918
GO:0010033	response to organic substance	470	42	20.5	123	0.00919	< 1e-30	0.10773	1e-30	2.04878
GO:0051254	positive regulation of RNA metabolic process	347	31	15.14	1209	1	< 1e-30	0.47891	1e-30	2.04756
GO:0030182	neuron differentiation	269	24	11.73	1029	0.37666	< 1e-30	0.99852	1e-30	2.04604
GO:0060548	negative regulation of cell death	213	19	9.29	972	0.35991	2.4e-07	0.23044	2.4e-07	2.04521
GO:0051241	negative regulation of multicellular organismal process	157	14	6.85	740	0.23484	1.5e-08	0.3315	1.5e-08	2.0438
GO:0010646	regulation of cell communication	539	48	23.51	674	0.16964	< 1e-30	1.4e-05	1e-30	2.04168
GO:0043393	regulation of protein binding	45	4	1.96	1834	1	0.00513	0.64739	0.00513	2.04082
GO:1902531	regulation of intracellular signal transduction	304	27	13.26	1321	1	2e-14	0.43425	2e-14	2.0362
GO:0032774	RNA biosynthetic process	563	50	24.56	488	0.08814	< 1e-30	0.29493	1e-30	2.03583
GO:0001558	regulation of cell growth	90	8	3.93	1403	1	6.9e-08	0.2381	6.9e-08	2.03562
GO:0051049	regulation of transport	282	25	12.3	1335	1	9e-13	0.05705	9e-13	2.03252
GO:0010564	regulation of cell cycle process	158	14	6.89	344	0.06198	9.2e-10	0.04861	9.2e-10	2.03193
GO:0098771	inorganic ion homeostasis	79	7	3.45	402	0.0688	0.00214	0.71022	0.00214	2.02899
GO:0048514	blood vessel morphogenesis	113	10	4.93	1401	1	5.9e-08	0.26049	5.9e-08	2.0284
GO:0002009	morphogenesis of an epithelium	113	10	4.93	747	0.24609	1.3e-06	0.9288	1.3e-06	2.0284
GO:0007052	mitotic spindle organization	34	3	1.48	1165	0.54704	0.00101	0.79836	0.00101	2.02703
GO:0031401	positive regulation of protein modification process	215	19	9.38	1331	1	5.3e-13	0.40375	5.3e-13	2.02559
GO:0043549	regulation of kinase activity	136	12	5.93	1382	1	3.3e-09	0.83856	3.3e-09	2.02361
GO:0023051	regulation of signaling	544	48	23.73	707	0.19512	< 1e-30	2.1e-06	1e-30	2.02276
GO:0044419	biological process involved in interspecies interaction between organisms	204	18	8.9	1381	1	3.1e-09	0.10475	3.1e-09	2.02247
GO:1901362	organic cyclic compound biosynthetic process	635	56	27.7	1213	1	< 1e-30	0.22851	1e-30	2.02166
GO:0043484	regulation of RNA splicing	68	6	2.97	1404	1	8.1e-08	0.47485	8.1e-08	2.0202
GO:0031667	response to nutrient levels	68	6	2.97	1427	1	4.5e-07	0.49443	4.5e-07	2.0202
GO:1901565	organonitrogen compound catabolic process	193	17	8.42	458	0.08043	7.1e-12	0.72558	7.1e-12	2.019
GO:0043069	negative regulation of programmed cell death	193	17	8.42	1451	1	2.2e-06	0.28407	2.2e-06	2.019
GO:0010467	gene expression	988	87	43.1	511	0.09832	< 1e-30	0.28235	1e-30	2.01856
GO:1903508	positive regulation of nucleic acid-templated transcription	307	27	13.39	1311	1	1.9e-15	0.23375	1.9e-15	2.01643
GO:0045893	positive regulation of transcription, DNA-templated	307	27	13.39	683	0.18023	1.9e-15	0.23375	1.9e-15	2.01643
GO:0010563	negative regulation of phosphorus metabolic process	91	8	3.97	1535	1	5.3e-05	0.26392	5.3e-05	2.01511
GO:0045936	negative regulation of phosphate metabolic process	91	8	3.97	1536	1	5.3e-05	0.26392	5.3e-05	2.01511
GO:0045087	innate immune response	91	8	3.97	268	0.04329	0.00022	0.52659	0.00022	2.01511
GO:0006351	transcription, DNA-templated	558	49	24.34	489	0.08857	< 1e-30	0.31397	1e-30	2.01315
GO:1902533	positive regulation of intracellular signal transduction	171	15	7.46	556	0.11	4.9e-06	0.89821	4.9e-06	2.01072
GO:0097659	nucleic acid-templated transcription	559	49	24.38	1235	1	< 1e-30	0.32754	1e-30	2.00984
GO:1902680	positive regulation of RNA biosynthetic process	308	27	13.44	1310	1	1.1e-15	0.25747	1.1e-15	2.00893
GO:0034250	positive regulation of cellular amide metabolic process	57	5	2.49	725	0.22188	0.00737	0.53799	0.00737	2.00803
GO:0071900	regulation of protein serine/threonine kinase activity	80	7	3.49	1556	1	8.7e-05	0.80606	8.7e-05	2.00573
GO:0050801	ion homeostasis	80	7	3.49	1699	1	0.00126	0.73271	0.00126	2.00573
GO:0060627	regulation of vesicle-mediated transport	103	9	4.49	1505	1	2.4e-05	0.16377	2.4e-05	2.00445
GO:0071310	cellular response to organic substance	401	35	17.49	1286	1	< 1e-30	0.0468	1e-30	2.00114
GO:0010605	negative regulation of macromolecule metabolic process	527	46	22.99	1229	1	< 1e-30	0.32133	1e-30	2.00087
GO:0014070	response to organic cyclic compound	126	11	5.5	1096	0.45019	1.1e-07	0.33275	1.1e-07	2
GO:0006165	nucleoside diphosphate phosphorylation	23	2	1	1692	1	0.00112	0.03711	0.00112	2
GO:0043535	regulation of blood vessel endothelial cell migration	23	2	1	1701	1	0.00129	0.1331	0.00129	2
GO:0048706	embryonic skeletal system development	23	2	1	1847	1	0.00599	0.32339	0.00599	2
GO:0060401	cytosolic calcium ion transport	23	2	1	1912	1	0.00934	0.14434	0.00934	2
GO:0019222	regulation of metabolic process	1056	92	46.06	1259	1	< 1e-30	0.15068	1e-30	1.99739
GO:0031328	positive regulation of cellular biosynthetic process	379	33	16.53	210	0.02571	2.1e-15	0.44003	2.1e-15	1.99637
GO:0070647	protein modification by small protein conjugation or removal	161	14	7.02	1456	1	3e-06	0.6874	3e-06	1.9943
GO:0045216	cell-cell junction organization	46	4	2.01	1553	1	8.1e-05	0.74841	8.1e-05	1.99005
GO:0009894	regulation of catabolic process	219	19	9.55	1360	1	9.6e-11	0.65508	9.6e-11	1.98953
GO:0006355	regulation of transcription, DNA-templated	542	47	23.64	177	0.01965	< 1e-30	0.31345	1e-30	1.98816
GO:0043065	positive regulation of apoptotic process	127	11	5.54	671	0.16775	1e-06	0.44474	1e-06	1.98556
GO:1903506	regulation of nucleic acid-templated transcription	543	47	23.69	1273	1	< 1e-30	0.32728	1e-30	1.98396
GO:0051054	positive regulation of DNA metabolic process	81	7	3.53	749	0.24805	0.00014	0.39179	0.00014	1.983
GO:0046777	protein autophosphorylation	81	7	3.53	229	0.03271	0.00023	0.62902	0.00023	1.983
GO:0009605	response to external stimulus	324	28	14.13	739	0.23442	< 1e-30	0.41021	1e-30	1.9816
GO:2001141	regulation of RNA biosynthetic process	544	47	23.73	1270	1	< 1e-30	0.35015	1e-30	1.98062
GO:0070201	regulation of establishment of protein localization	116	10	5.06	1459	1	3.3e-06	0.46403	3.3e-06	1.97628
GO:0050776	regulation of immune response	93	8	4.06	1902	1	0.00868	0.16946	0.00868	1.97044
GO:0006366	transcription by RNA polymerase II	419	36	18.28	262	0.03897	< 1e-30	0.24248	1e-30	1.96937
GO:0051171	regulation of nitrogen compound metabolic process	943	81	41.13	1290	1	< 1e-30	0.13496	1e-30	1.96937
GO:0080090	regulation of primary metabolic process	955	82	41.66	1216	1	< 1e-30	0.10737	1e-30	1.96831
GO:0006873	cellular ion homeostasis	70	6	3.05	408	0.06902	0.00439	0.45687	0.00439	1.96721
GO:0033365	protein localization to organelle	210	18	9.16	722	0.22028	5.7e-12	0.91091	5.7e-12	1.96507
GO:0060255	regulation of macromolecule metabolic process	1004	86	43.8	512	0.09935	< 1e-30	0.23031	1e-30	1.96347
GO:0014020	primary neural tube formation	35	3	1.53	1777	1	0.00273	0.32458	0.00273	1.96078
GO:0009967	positive regulation of signal transduction	246	21	10.73	1053	0.40249	3.8e-10	0.81089	3.8e-10	1.95713
GO:0044248	cellular catabolic process	328	28	14.31	918	0.33023	< 1e-30	0.12343	1e-30	1.95667
GO:0048729	tissue morphogenesis	129	11	5.63	394	0.06807	2.6e-07	0.93526	2.6e-07	1.95382
GO:0043068	positive regulation of programmed cell death	129	11	5.63	1447	1	2e-06	0.46276	2e-06	1.95382
GO:0051098	regulation of binding	94	8	4.1	1613	1	0.00038	0.45098	0.00038	1.95122
GO:0010632	regulation of epithelial cell migration	47	4	2.05	1759	1	0.00241	0.9323	0.00241	1.95122
GO:0031324	negative regulation of cellular metabolic process	494	42	21.55	1297	1	< 1e-30	0.42218	1e-30	1.94896
GO:0006402	mRNA catabolic process	59	5	2.57	241	0.03523	4.8e-05	0.88609	4.8e-05	1.94553
GO:0032388	positive regulation of intracellular transport	59	5	2.57	1730	1	0.00166	0.78691	0.00166	1.94553
GO:0051338	regulation of transferase activity	165	14	7.2	1376	1	1.6e-09	0.87415	1.6e-09	1.94444
GO:0009892	negative regulation of metabolic process	566	48	24.69	1233	1	< 1e-30	0.38203	1e-30	1.94411
GO:0035239	tube morphogenesis	177	15	7.72	583	0.13006	5.3e-10	0.42265	5.3e-10	1.94301
GO:0009719	response to endogenous stimulus	260	22	11.34	502	0.09723	4.4e-16	0.09126	4.4e-16	1.94004
GO:0071417	cellular response to organonitrogen compound	130	11	5.67	1406	1	9.1e-08	0.44259	9.1e-08	1.94004
GO:0031323	regulation of cellular metabolic process	983	83	42.88	1296	1	< 1e-30	0.08337	1e-30	1.93563
GO:0043547	positive regulation of GTPase activity	71	6	3.1	678	0.17439	3.2e-07	0.99933	3.2e-07	1.93548
GO:0062197	cellular response to chemical stress	71	6	3.1	103	0.00709	0.00924	0.27039	0.00924	1.93548
GO:0071495	cellular response to endogenous stimulus	237	20	10.34	1317	1	1.3e-14	0.08299	1.3e-14	1.93424
GO:0043603	cellular amide metabolic process	178	15	7.76	1353	1	5.7e-11	0.62565	5.7e-11	1.93299
GO:0072594	establishment of protein localization to organelle	95	8	4.14	493	0.09343	3.8e-06	0.76697	3.8e-06	1.93237
GO:0010557	positive regulation of macromolecule biosynthetic process	368	31	16.05	769	0.25766	7.5e-15	0.72547	7.5e-15	1.93146
GO:0032270	positive regulation of cellular protein metabolic process	297	25	12.96	1307	1	2.2e-16	0.67668	2.2e-16	1.92901
GO:0007584	response to nutrient	12	1	0.52	927	0.35263	0.0003	0.30328	0.0003	1.92308
GO:0045197	establishment or maintenance of epithelial cell apical/basal polarity	12	1	0.52	928	0.35263	0.00144	0.56055	0.00144	1.92308
GO:0070830	bicellular tight junction assembly	12	1	0.52	929	0.35263	0.00172	0.98509	0.00172	1.92308
GO:0016601	Rac protein signal transduction	12	1	0.52	930	0.35263	0.00192	0.28704	0.00192	1.92308
GO:0097530	granulocyte migration	12	1	0.52	1771	1	0.00269	0.03807	0.00269	1.92308
GO:0016233	telomere capping	12	1	0.52	931	0.35263	0.00397	0.02216	0.00397	1.92308
GO:0016925	protein sumoylation	12	1	0.52	932	0.35263	0.00548	0.97176	0.00548	1.92308
GO:0045773	positive regulation of axon extension	12	1	0.52	933	0.35263	0.00603	0.72802	0.00603	1.92308
GO:0045646	regulation of erythrocyte differentiation	12	1	0.52	934	0.35263	0.00773	0.11483	0.00773	1.92308
GO:0010468	regulation of gene expression	787	66	34.33	978	0.37047	< 1e-30	0.25665	1e-30	1.92252
GO:0044271	cellular nitrogen compound biosynthetic process	740	62	32.28	1222	1	< 1e-30	0.42359	1e-30	1.92069
GO:0030163	protein catabolic process	179	15	7.81	744	0.24321	1.6e-11	0.85464	1.6e-11	1.92061
GO:0051223	regulation of protein transport	108	9	4.71	1481	1	9.3e-06	0.5187	9.3e-06	1.91083
GO:0001763	morphogenesis of a branching structure	36	3	1.57	1675	1	0.00092	0.56023	0.00092	1.91083
GO:0051480	regulation of cytosolic calcium ion concentration	36	3	1.57	661	0.16499	0.00102	0.26704	0.00102	1.91083
GO:0046034	ATP metabolic process	36	3	1.57	790	0.27707	0.00256	0.07532	0.00256	1.91083
GO:0044283	small molecule biosynthetic process	60	5	2.62	1565	1	0.00011	0.06636	0.00011	1.9084
GO:0006357	regulation of transcription by RNA polymerase II	409	34	17.84	770	0.2623	3.3e-16	0.21226	3.3e-16	1.90583
GO:0009179	purine ribonucleoside diphosphate metabolic process	24	2	1.05	1634	1	0.00048	0.02382	0.00048	1.90476
GO:0009135	purine nucleoside diphosphate metabolic process	24	2	1.05	1635	1	0.00048	0.02382	0.00048	1.90476
GO:0046031	ADP metabolic process	24	2	1.05	1636	1	0.00048	0.02382	0.00048	1.90476
GO:0046939	nucleotide phosphorylation	24	2	1.05	1752	1	0.00219	0.04657	0.00219	1.90476
GO:0032535	regulation of cellular component size	97	8	4.23	1453	1	2.3e-06	0.46401	2.3e-06	1.89125
GO:0007610	behavior	97	8	4.23	1589	1	0.00021	0.99128	0.00021	1.89125
GO:0010562	positive regulation of phosphorus metabolic process	170	14	7.42	1340	1	5.9e-12	0.22371	5.9e-12	1.88679
GO:0045937	positive regulation of phosphate metabolic process	170	14	7.42	584	0.13053	5.9e-12	0.22371	5.9e-12	1.88679
GO:0034762	regulation of transmembrane transport	73	6	3.18	1648	1	0.00058	0.61664	0.00058	1.88679
GO:0001819	positive regulation of cytokine production	61	5	2.66	867	0.3249	0.00092	0.52284	0.00092	1.8797
GO:0045944	positive regulation of transcription by RNA polymerase II	232	19	10.12	23	0.00054	2.9e-12	0.12548	2.9e-12	1.87747
GO:0010647	positive regulation of cell communication	269	22	11.73	1352	1	5.6e-11	0.80921	5.6e-11	1.87553
GO:0006629	lipid metabolic process	110	9	4.8	1716	1	0.00148	0.44967	0.00148	1.875
GO:0010556	regulation of macromolecule biosynthetic process	650	53	28.35	341	0.05953	< 1e-30	0.412	1e-30	1.86949
GO:0010876	lipid localization	49	4	2.14	1601	1	0.0003	0.16095	0.0003	1.86916
GO:0042594	response to starvation	49	4	2.14	1657	1	0.00069	0.83162	0.00069	1.86916
GO:0010942	positive regulation of cell death	135	11	5.89	1452	1	2.2e-06	0.47277	2.2e-06	1.86757
GO:0043085	positive regulation of catalytic activity	221	18	9.64	613	0.13526	1.1e-11	0.99819	1.1e-11	1.86722
GO:0051246	regulation of protein metabolic process	504	41	21.99	1214	1	< 1e-30	0.90572	1e-30	1.86448
GO:2001252	positive regulation of chromosome organization	37	3	1.61	883	0.32736	0.00145	0.9241	0.00145	1.86335
GO:0007548	sex differentiation	37	3	1.61	540	0.10257	0.00636	0.65554	0.00636	1.86335
GO:0043604	amide biosynthetic process	160	13	6.98	16	0.00016	1.1e-09	0.59256	1.1e-09	1.86246
GO:1901576	organic substance biosynthetic process	813	66	35.46	1284	1	< 1e-30	0.4283	1e-30	1.86125
GO:0019220	regulation of phosphate metabolic process	271	22	11.82	1318	1	1.6e-14	0.30042	1.6e-14	1.86125
GO:0051174	regulation of phosphorus metabolic process	271	22	11.82	1319	1	1.6e-14	0.30042	1.6e-14	1.86125
GO:0009058	biosynthetic process	826	67	36.03	1241	1	< 1e-30	0.36774	1e-30	1.85956
GO:0031331	positive regulation of cellular catabolic process	111	9	4.84	151	0.01422	5.6e-06	0.59525	5.6e-06	1.8595
GO:0002684	positive regulation of immune system process	111	9	4.84	1530	1	4.7e-05	0.03806	4.7e-05	1.8595
GO:0099536	synaptic signaling	111	9	4.84	695	0.19173	0.00016	0.98942	0.00016	1.8595
GO:0051726	regulation of cell cycle	235	19	10.25	621	0.14576	8.3e-13	0.20037	8.3e-13	1.85366
GO:0051052	regulation of DNA metabolic process	124	10	5.41	1540	1	5.9e-05	0.54916	5.9e-05	1.84843
GO:0023056	positive regulation of signaling	273	22	11.91	1354	1	6.8e-11	0.82068	6.8e-11	1.84719
GO:1901700	response to oxygen-containing compound	261	21	11.39	1031	0.38089	6.4e-14	0.20996	6.4e-14	1.84372
GO:0051347	positive regulation of transferase activity	112	9	4.89	976	0.36935	1.2e-07	0.55312	1.2e-07	1.84049
GO:0009889	regulation of biosynthetic process	673	54	29.36	221	0.03017	< 1e-30	0.38535	1e-30	1.83924
GO:0000278	mitotic cell cycle	212	17	9.25	1032	0.38447	2.3e-15	0.29111	2.3e-15	1.83784
GO:0009059	macromolecule biosynthetic process	737	59	32.15	1242	1	< 1e-30	0.39368	1e-30	1.83515
GO:1901342	regulation of vasculature development	50	4	2.18	1639	1	0.00052	0.06794	0.00052	1.83486
GO:0045765	regulation of angiogenesis	50	4	2.18	1640	1	0.00052	0.06794	0.00052	1.83486
GO:0043487	regulation of RNA stability	50	4	2.18	1643	1	0.00055	0.82988	0.00055	1.83486
GO:0016042	lipid catabolic process	25	2	1.09	1660	1	0.00072	0.00412	0.00072	1.83486
GO:0006605	protein targeting	50	4	2.18	1126	0.49475	0.0025	0.89786	0.0025	1.83486
GO:0045727	positive regulation of translation	50	4	2.18	518	0.10081	0.00292	0.63273	0.00292	1.83486
GO:0000045	autophagosome assembly	25	2	1.09	1899	1	0.00859	0.36837	0.00859	1.83486
GO:0032268	regulation of cellular protein metabolic process	475	38	20.72	1223	1	< 1e-30	0.89196	1e-30	1.83398
GO:0051345	positive regulation of hydrolase activity	113	9	4.93	353	0.06384	5.3e-08	0.99901	5.3e-08	1.82556
GO:0010243	response to organonitrogen compound	176	14	7.68	717	0.21727	1.7e-08	0.65162	1.7e-08	1.82292
GO:0044249	cellular biosynthetic process	806	64	35.16	1224	1	< 1e-30	0.32798	1e-30	1.82025
GO:0060070	canonical Wnt signaling pathway	63	5	2.75	1767	1	0.00259	0.78949	0.00259	1.81818
GO:0051248	negative regulation of protein metabolic process	202	16	8.81	1396	1	3.9e-08	0.84219	3.9e-08	1.81612
GO:0044265	cellular macromolecule catabolic process	215	17	9.38	1330	1	4.8e-13	0.78722	4.8e-13	1.81237
GO:0045860	positive regulation of protein kinase activity	76	6	3.32	1484	1	9.5e-06	0.40055	9.5e-06	1.80723
GO:0031326	regulation of cellular biosynthetic process	660	52	28.79	1298	1	< 1e-30	0.31944	1e-30	1.80618
GO:0033674	positive regulation of kinase activity	89	7	3.88	979	0.37105	7.8e-07	0.62293	7.8e-07	1.80412
GO:0061013	regulation of mRNA catabolic process	51	4	2.22	1599	1	0.00029	0.84283	0.00029	1.8018
GO:0071407	cellular response to organic cyclic compound	102	8	4.45	1204	0.83021	6.1e-06	0.46126	6.1e-06	1.79775
GO:0006468	protein phosphorylation	332	26	14.48	716	0.2143	< 1e-30	0.94911	1e-30	1.79558
GO:0006508	proteolysis	230	18	10.03	217	0.0284	7.6e-10	0.96869	7.6e-10	1.79462
GO:1903047	mitotic cell cycle process	179	14	7.81	691	0.18949	1.6e-13	0.21433	1.6e-13	1.79257
GO:0032269	negative regulation of cellular protein metabolic process	192	15	8.38	1416	1	2.4e-07	0.87187	2.4e-07	1.78998
GO:0031589	cell-substrate adhesion	77	6	3.36	1575	1	0.00015	0.98585	0.00015	1.78571
GO:0098916	anterograde trans-synaptic signaling	103	8	4.49	1545	1	7e-05	0.98696	7e-05	1.78174
GO:0007268	chemical synaptic transmission	103	8	4.49	1546	1	7e-05	0.98696	7e-05	1.78174
GO:0022414	reproductive process	206	16	8.99	1308	1	3.3e-16	0.11443	3.3e-16	1.77976
GO:0006811	ion transport	129	10	5.63	235	0.03481	1.5e-06	0.26025	1.5e-06	1.7762
GO:0001932	regulation of protein phosphorylation	220	17	9.6	1325	1	1.7e-13	0.63289	1.7e-13	1.77083
GO:0031023	microtubule organizing center organization	26	2	1.13	1749	1	0.00218	0.17609	0.00218	1.76991
GO:0032206	positive regulation of telomere maintenance	26	2	1.13	987	0.37495	0.00677	0.38261	0.00677	1.76991
GO:0061157	mRNA destabilization	26	2	1.13	735	0.22366	0.00981	0.76365	0.00981	1.76991
GO:1902850	microtubule cytoskeleton organization involved in mitosis	39	3	1.7	1557	1	8.9e-05	0.79154	8.9e-05	1.76471
GO:0006869	lipid transport	39	3	1.7	741	0.23497	0.0004	0.14645	0.0004	1.76471
GO:0001841	neural tube formation	39	3	1.7	1685	1	0.00106	0.36147	0.00106	1.76471
GO:0055080	cation homeostasis	78	6	3.4	1727	1	0.00162	0.70095	0.00162	1.76471
GO:0000003	reproduction	208	16	9.07	1304	1	1.1e-16	0.11155	1.1e-16	1.76406
GO:0010629	negative regulation of gene expression	221	17	9.64	1200	0.72858	1.2e-14	0.36289	1.2e-14	1.76349
GO:0043410	positive regulation of MAPK cascade	91	7	3.97	1060	0.41441	0.00043	0.46175	0.00043	1.76322
GO:0007517	muscle organ development	52	4	2.27	760	0.2501	5.1e-05	0.6763	5.1e-05	1.76211
GO:0072503	cellular divalent inorganic cation homeostasis	52	4	2.27	537	0.10235	0.00325	0.50529	0.00325	1.76211
GO:0042325	regulation of phosphorylation	248	19	10.82	1314	1	8.1e-15	0.50732	8.1e-15	1.75601
GO:0006414	translational elongation	13	1	0.57	989	0.37569	0.00056	0.01817	0.00056	1.75439
GO:0009299	mRNA transcription	13	1	0.57	990	0.37569	0.00066	0.32641	0.00066	1.75439
GO:0051148	negative regulation of muscle cell differentiation	13	1	0.57	991	0.37569	0.0028	0.3747	0.0028	1.75439
GO:1905954	positive regulation of lipid localization	13	1	0.57	992	0.37569	0.00288	0.13521	0.00288	1.75439
GO:0009205	purine ribonucleoside triphosphate metabolic process	13	1	0.57	993	0.37569	0.00333	0.42869	0.00333	1.75439
GO:0061245	establishment or maintenance of bipolar cell polarity	13	1	0.57	1801	1	0.00366	0.60433	0.00366	1.75439
GO:0035088	establishment or maintenance of apical/basal cell polarity	13	1	0.57	1802	1	0.00366	0.60433	0.00366	1.75439
GO:0007032	endosome organization	13	1	0.57	994	0.37569	0.00596	0.09922	0.00596	1.75439
GO:0007568	aging	13	1	0.57	995	0.37569	0.00613	0.00408	0.00613	1.75439
GO:0010463	mesenchymal cell proliferation	13	1	0.57	1873	1	0.00731	0.77121	0.00731	1.75439
GO:0048678	response to axon injury	13	1	0.57	996	0.37569	0.00842	0.19516	0.00842	1.75439
GO:0071867	response to monoamine	13	1	0.57	1893	1	0.00844	0.5496	0.00844	1.75439
GO:0071868	cellular response to monoamine stimulus	13	1	0.57	1894	1	0.00844	0.5496	0.00844	1.75439
GO:0071869	response to catecholamine	13	1	0.57	1895	1	0.00844	0.5496	0.00844	1.75439
GO:0071870	cellular response to catecholamine stimulus	13	1	0.57	1896	1	0.00844	0.5496	0.00844	1.75439
GO:0048026	positive regulation of mRNA splicing, via spliceosome	13	1	0.57	997	0.37569	0.00932	0.70742	0.00932	1.75439
GO:1901566	organonitrogen compound biosynthetic process	223	17	9.73	736	0.22582	3.9e-11	0.35281	3.9e-11	1.74717
GO:0099537	trans-synaptic signaling	105	8	4.58	1514	1	2.9e-05	0.988	2.9e-05	1.74672
GO:0034765	regulation of ion transmembrane transport	53	4	2.31	1755	1	0.0023	0.75451	0.0023	1.7316
GO:0042327	positive regulation of phosphorylation	159	12	6.94	1338	1	3.7e-12	0.31275	3.7e-12	1.72911
GO:0032446	protein modification by small protein conjugation	133	10	5.8	1567	1	0.00011	0.80116	0.00011	1.72414
GO:0016310	phosphorylation	373	28	16.27	1205	1	< 1e-30	0.88484	1e-30	1.72096
GO:1905114	cell surface receptor signaling pathway involved in cell-cell signaling	107	8	4.67	1409	1	1.4e-07	0.27254	1.4e-07	1.71306
GO:0009617	response to bacterium	67	5	2.92	983	0.37278	1.9e-05	0.08785	1.9e-05	1.71233
GO:0003006	developmental process involved in reproduction	148	11	6.46	234	0.03475	1.3e-11	0.26907	1.3e-11	1.70279
GO:0001934	positive regulation of protein phosphorylation	148	11	6.46	614	0.13721	7e-11	0.27152	7e-11	1.70279
GO:0034220	ion transmembrane transport	81	6	3.53	1603	1	0.0003	0.24978	0.0003	1.69972
GO:0060562	epithelial tube morphogenesis	81	6	3.53	1654	1	0.00067	0.77861	0.00067	1.69972
GO:0016052	carbohydrate catabolic process	27	2	1.18	1668	1	0.00085	0.01654	0.00085	1.69492
GO:0071453	cellular response to oxygen levels	27	2	1.18	612	0.13474	0.00182	0.04831	0.00182	1.69492
GO:0050779	RNA destabilization	27	2	1.18	1828	1	0.00488	0.68785	0.00488	1.69492
GO:0048754	branching morphogenesis of an epithelial tube	27	2	1.18	755	0.24916	0.00802	0.91719	0.00802	1.69492
GO:0001525	angiogenesis	95	7	4.14	984	0.37445	2.3e-05	0.34703	2.3e-05	1.69082
GO:0030003	cellular cation homeostasis	68	5	2.97	1841	1	0.00562	0.37689	0.00562	1.6835
GO:0032496	response to lipopolysaccharide	41	3	1.79	1653	1	0.00066	0.2957	0.00066	1.67598
GO:0016567	protein ubiquitination	123	9	5.37	768	0.25614	0.00081	0.74115	0.00081	1.67598
GO:0016055	Wnt signaling pathway	96	7	4.19	1436	1	7.9e-07	0.2603	7.9e-07	1.67064
GO:0055082	cellular chemical homeostasis	96	7	4.19	1532	1	5e-05	0.1023	5e-05	1.67064
GO:0010975	regulation of neuron projection development	110	8	4.8	1366	1	3.9e-10	0.88458	3.9e-10	1.66667
GO:0006518	peptide metabolic process	165	12	7.2	137	0.01151	1.3e-08	0.70535	1.3e-08	1.66667
GO:0006606	protein import into nucleus	55	4	2.4	545	0.10332	1e-05	0.51316	1e-05	1.66667
GO:0051170	import into nucleus	55	4	2.4	1485	1	1e-05	0.51316	1e-05	1.66667
GO:0008610	lipid biosynthetic process	55	4	2.4	1184	0.60721	0.00175	0.09021	0.00175	1.66667
GO:0010959	regulation of metal ion transport	55	4	2.4	1891	1	0.00841	0.75111	0.00841	1.66667
GO:0055065	metal ion homeostasis	69	5	3.01	727	0.22227	0.00332	0.67295	0.00332	1.66113
GO:0045862	positive regulation of proteolysis	69	5	3.01	432	0.07525	0.00499	0.46517	0.00499	1.66113
GO:0007267	cell-cell signaling	235	17	10.25	1199	0.71363	2.6e-11	0.72149	2.6e-11	1.65854
GO:0198738	cell-cell signaling by wnt	97	7	4.23	1440	1	1.5e-06	0.28817	1.5e-06	1.65485
GO:0048608	reproductive structure development	84	6	3.66	653	0.16405	3.7e-08	0.21692	3.7e-08	1.63934
GO:0061458	reproductive system development	84	6	3.66	1395	1	3.7e-08	0.21692	3.7e-08	1.63934
GO:0031345	negative regulation of cell projection organization	42	3	1.83	386	0.06573	2.1e-05	0.15117	2.1e-05	1.63934
GO:0002237	response to molecule of bacterial origin	42	3	1.83	1618	1	0.0004	0.27748	0.0004	1.63934
GO:0120192	tight junction assembly	14	1	0.61	1627	1	0.00045	0.98425	0.00045	1.63934
GO:0001764	neuron migration	28	2	1.22	772	0.2625	0.00272	0.85903	0.00272	1.63934
GO:1900087	positive regulation of G1/S transition of mitotic cell cycle	14	1	0.61	1041	0.39794	0.00386	0.60553	0.00386	1.63934
GO:0031102	neuron projection regeneration	14	1	0.61	1042	0.39794	0.00446	0.23508	0.00446	1.63934
GO:0072507	divalent inorganic cation homeostasis	56	4	2.44	1827	1	0.00483	0.46859	0.00483	1.63934
GO:0051225	spindle assembly	28	2	1.22	773	0.2625	0.00572	0.53985	0.00572	1.63934
GO:1903201	regulation of oxidative stress-induced cell death	14	1	0.61	1857	1	0.00645	0.03929	0.00645	1.63934
GO:1901799	negative regulation of proteasomal protein catabolic process	14	1	0.61	1870	1	0.00708	0.60206	0.00708	1.63934
GO:0044262	cellular carbohydrate metabolic process	56	4	2.44	1875	1	0.00741	0.23744	0.00741	1.63934
GO:0051603	proteolysis involved in cellular protein catabolic process	141	10	6.15	520	0.10101	1.9e-10	0.92677	1.9e-10	1.62602
GO:0006952	defense response	184	13	8.03	1384	1	4.8e-09	0.43017	4.8e-09	1.61893
GO:0030001	metal ion transport	85	6	3.71	1625	1	0.00044	0.67701	0.00044	1.61725
GO:0005975	carbohydrate metabolic process	85	6	3.71	1794	1	0.0034	0.25213	0.0034	1.61725
GO:0031329	regulation of cellular catabolic process	186	13	8.11	1373	1	9.7e-10	0.59884	9.7e-10	1.60296
GO:0006511	ubiquitin-dependent protein catabolic process	129	9	5.63	231	0.03352	1.9e-09	0.95592	1.9e-09	1.59858
GO:0008361	regulation of cell size	43	3	1.88	632	0.15738	5.4e-07	0.38727	5.4e-07	1.59574
GO:0019941	modification-dependent protein catabolic process	130	9	5.67	1374	1	1.3e-09	0.95503	1.3e-09	1.5873
GO:0043632	modification-dependent macromolecule catabolic process	130	9	5.67	1375	1	1.3e-09	0.95503	1.3e-09	1.5873
GO:0048609	multicellular organismal reproductive process	116	8	5.06	1097	0.45448	2.1e-06	0.23742	2.1e-06	1.58103
GO:0032504	multicellular organism reproduction	116	8	5.06	1449	1	2.1e-06	0.23742	2.1e-06	1.58103
GO:1905477	positive regulation of protein localization to membrane	29	2	1.27	784	0.27585	0.00025	0.80421	0.00025	1.5748
GO:0007519	skeletal muscle tissue development	29	2	1.27	785	0.27585	0.00347	0.72414	0.00347	1.5748
GO:0006006	glucose metabolic process	44	3	1.92	387	0.06577	0.00074	0.52865	0.00074	1.5625
GO:0072175	epithelial tube formation	44	3	1.92	1772	1	0.00272	0.54543	0.00272	1.5625
GO:0001838	embryonic epithelial tube formation	44	3	1.92	1773	1	0.00272	0.54543	0.00272	1.5625
GO:0051403	stress-activated MAPK cascade	59	4	2.57	1571	1	0.00013	0.02799	0.00013	1.55642
GO:0050778	positive regulation of immune response	59	4	2.57	1656	1	0.00068	0.03405	0.00068	1.55642
GO:0098662	inorganic cation transmembrane transport	59	4	2.57	1666	1	0.00081	0.57875	0.00081	1.55642
GO:0055085	transmembrane transport	119	8	5.19	1059	0.41438	5.5e-05	0.41333	5.5e-05	1.54143
GO:0044257	cellular protein catabolic process	149	10	6.5	1357	1	8.8e-11	0.85536	8.8e-11	1.53846
GO:0048025	negative regulation of mRNA splicing, via spliceosome	15	1	0.65	1063	0.41939	0.0004	0.0042	0.0004	1.53846
GO:0032387	negative regulation of intracellular transport	15	1	0.65	1064	0.41939	0.00704	0.18082	0.00704	1.53846
GO:0008584	male gonad development	15	1	0.65	1065	0.41939	0.00926	0.56681	0.00926	1.53846
GO:0046546	development of primary male sexual characteristics	15	1	0.65	1911	1	0.00926	0.56681	0.00926	1.53846
GO:0033500	carbohydrate homeostasis	45	3	1.96	1479	1	9e-06	0.01319	9e-06	1.53061
GO:0042593	glucose homeostasis	45	3	1.96	588	0.13272	9e-06	0.01319	9e-06	1.53061
GO:0019318	hexose metabolic process	45	3	1.96	1629	1	0.00045	0.55079	0.00045	1.53061
GO:0005996	monosaccharide metabolic process	45	3	1.96	1630	1	0.00045	0.55079	0.00045	1.53061
GO:0043269	regulation of ion transport	75	5	3.27	1632	1	0.00046	0.32065	0.00046	1.52905
GO:0009266	response to temperature stimulus	30	2	1.31	670	0.16555	0.00598	0.40332	0.00598	1.52672
GO:0006875	cellular metal ion homeostasis	60	4	2.62	882	0.32712	0.0068	0.37507	0.0068	1.52672
GO:0031098	stress-activated protein kinase signaling cascade	61	4	2.66	1576	1	0.00015	0.0332	0.00015	1.50376
GO:0098660	inorganic ion transmembrane transport	61	4	2.66	1728	1	0.00162	0.63698	0.00162	1.50376
GO:0043488	regulation of mRNA stability	46	3	2.01	1665	1	0.00077	0.75043	0.00077	1.49254
GO:0021537	telencephalon development	46	3	2.01	456	0.07598	0.00131	0.49721	0.00131	1.49254
GO:0016331	morphogenesis of embryonic epithelium	46	3	2.01	1816	1	0.00431	0.65849	0.00431	1.49254
GO:0046903	secretion	123	8	5.37	1520	1	3.3e-05	0.10532	3.3e-05	1.48976
GO:0034504	protein localization to nucleus	108	7	4.71	721	0.21938	1.1e-06	0.72558	1.1e-06	1.4862
GO:0060538	skeletal muscle organ development	31	2	1.35	1684	1	0.00105	0.74368	0.00105	1.48148
GO:0007043	cell-cell junction assembly	31	2	1.35	1689	1	0.0011	0.88467	0.0011	1.48148
GO:0051147	regulation of muscle cell differentiation	31	2	1.35	1725	1	0.00159	0.48881	0.00159	1.48148
GO:0042177	negative regulation of protein catabolic process	31	2	1.35	800	0.27799	0.00471	0.72607	0.00471	1.48148
GO:0007276	gamete generation	94	6	4.1	1508	1	2.7e-05	0.44783	2.7e-05	1.46341
GO:0008360	regulation of cell shape	47	3	2.05	738	0.23318	0.00138	0.60345	0.00138	1.46341
GO:0000209	protein polyubiquitination	47	3	2.05	1712	1	0.00144	0.89998	0.00144	1.46341
GO:0042391	regulation of membrane potential	47	3	2.05	1745	1	0.00198	0.34304	0.00198	1.46341
GO:0070302	regulation of stress-activated protein kinase signaling cascade	47	3	2.05	1768	1	0.0026	0.17429	0.0026	1.46341
GO:0032872	regulation of stress-activated MAPK cascade	47	3	2.05	667	0.16526	0.0026	0.17429	0.0026	1.46341
GO:0009416	response to light stimulus	47	3	2.05	1814	1	0.0043	0.62458	0.0043	1.46341
GO:0010810	regulation of cell-substrate adhesion	47	3	2.05	1859	1	0.00652	0.83533	0.00652	1.46341
GO:0001816	cytokine production	110	7	4.8	597	0.1335	7.7e-05	0.41962	7.7e-05	1.45833
GO:0017038	protein import	63	4	2.75	1522	1	3.5e-05	0.5887	3.5e-05	1.45455
GO:0009895	negative regulation of catabolic process	79	5	3.45	729	0.22261	3.8e-05	0.74749	3.8e-05	1.44928
GO:1905475	regulation of protein localization to membrane	48	3	2.09	1127	0.49628	0.00011	0.5356	0.00011	1.43541
GO:0045930	negative regulation of mitotic cell cycle	48	3	2.09	668	0.16529	0.00074	0.43621	0.00074	1.43541
GO:0035148	tube formation	48	3	2.09	1729	1	0.00163	0.40441	0.00163	1.43541
GO:0007005	mitochondrion organization	64	4	2.79	1030	0.37869	0.00907	0.98331	0.00907	1.43369
GO:0010608	post-transcriptional regulation of gene expression	144	9	6.28	1359	1	9.3e-11	0.76463	9.3e-11	1.43312
GO:0045786	negative regulation of cell cycle	80	5	3.49	1487	1	1.1e-05	0.20293	1.1e-05	1.43266
GO:0032940	secretion by cell	112	7	4.89	1501	1	2.3e-05	0.1399	2.3e-05	1.43149
GO:0032434	regulation of proteasomal ubiquitin-dependent protein catabolic process	32	2	1.4	1800	1	0.00357	0.75575	0.00357	1.42857
GO:1902808	positive regulation of cell cycle G1/S phase transition	16	1	0.7	1821	1	0.00464	0.70368	0.00464	1.42857
GO:0090398	cellular senescence	16	1	0.7	1081	0.44009	0.0049	0.22251	0.0049	1.42857
GO:0045638	negative regulation of myeloid cell differentiation	16	1	0.7	1082	0.44009	0.00612	0.27224	0.00612	1.42857
GO:1903533	regulation of protein targeting	16	1	0.7	1083	0.44009	0.00691	0.87432	0.00691	1.42857
GO:0050685	positive regulation of mRNA processing	16	1	0.7	1880	1	0.00761	0.65357	0.00761	1.42857
GO:0034248	regulation of cellular amide metabolic process	113	7	4.93	1432	1	5.4e-07	0.63486	5.4e-07	1.41988
GO:0061919	process utilizing autophagic mechanism	97	6	4.23	1527	1	4.1e-05	0.5402	4.1e-05	1.41844
GO:0006914	autophagy	97	6	4.23	316	0.05558	4.1e-05	0.5402	4.1e-05	1.41844
GO:0022412	cellular process involved in reproduction in multicellular organism	49	3	2.14	923	0.35172	0.00091	0.30052	0.00091	1.40187
GO:0006874	cellular calcium ion homeostasis	49	3	2.14	1879	1	0.00758	0.33748	0.00758	1.40187
GO:0010948	negative regulation of cell cycle process	66	4	2.88	762	0.25062	4.7e-05	0.31847	4.7e-05	1.38889
GO:0006812	cation transport	99	6	4.32	1547	1	7.3e-05	0.50159	7.3e-05	1.38889
GO:2000045	regulation of G1/S transition of mitotic cell cycle	33	2	1.44	1579	1	0.00017	0.40429	0.00017	1.38889
GO:0098655	cation transmembrane transport	66	4	2.88	1583	1	0.0002	0.50579	0.0002	1.38889
GO:0070588	calcium ion transmembrane transport	33	2	1.44	1897	1	0.00849	0.24229	0.00849	1.38889
GO:0006412	translation	150	9	6.54	737	0.23161	2.1e-08	0.60838	2.1e-08	1.37615
GO:0043043	peptide biosynthetic process	151	9	6.59	1393	1	3.4e-08	0.60332	3.4e-08	1.36571
GO:0000082	G1/S transition of mitotic cell cycle	51	3	2.22	1111	0.47797	1.4e-05	0.46029	1.4e-05	1.35135
GO:0048708	astrocyte differentiation	17	1	0.74	1099	0.46005	0.00011	0.26107	0.00011	1.35135
GO:1902806	regulation of cell cycle G1/S phase transition	34	2	1.48	1615	1	0.00038	0.58354	0.00038	1.35135
GO:1900182	positive regulation of protein localization to nucleus	34	2	1.48	1098	0.45943	0.00362	0.58779	0.00362	1.35135
GO:0021915	neural tube development	51	3	2.22	1820	1	0.00454	0.874	0.00454	1.35135
GO:0055074	calcium ion homeostasis	51	3	2.22	1845	1	0.00587	0.36906	0.00587	1.35135
GO:0046661	male sex differentiation	17	1	0.74	1865	1	0.00676	0.57515	0.00676	1.35135
GO:0042307	positive regulation of protein import into nucleus	17	1	0.74	1100	0.46005	0.00743	0.39811	0.00743	1.35135
GO:0097529	myeloid leukocyte migration	17	1	0.74	1919	1	0.00973	0.20119	0.00973	1.35135
GO:0033045	regulation of sister chromatid segregation	17	1	0.74	1920	1	0.00995	0.86868	0.00995	1.35135
GO:0140352	export from cell	119	7	5.19	1429	1	4.8e-07	0.0685	4.8e-07	1.34875
GO:0043161	proteasome-mediated ubiquitin-dependent protein catabolic process	85	5	3.71	680	0.17691	3.6e-07	0.97874	3.6e-07	1.34771
GO:0006417	regulation of translation	103	6	4.49	1426	1	4.4e-07	0.64621	4.4e-07	1.3363
GO:0007283	spermatogenesis	69	4	3.01	743	0.24219	0.00025	0.46943	0.00025	1.3289
GO:0044843	cell cycle G1/S phase transition	52	3	2.27	1513	1	2.9e-05	0.60493	2.9e-05	1.32159
GO:0017148	negative regulation of translation	52	3	2.27	1185	0.60877	4.5e-05	0.7683	4.5e-05	1.32159
GO:1900180	regulation of protein localization to nucleus	52	3	2.27	925	0.35186	0.00019	0.65103	0.00019	1.32159
GO:0048232	male gamete generation	70	4	3.05	1614	1	0.00038	0.45056	0.00038	1.31148
GO:0016051	carbohydrate biosynthetic process	35	2	1.53	1913	1	0.00946	0.42739	0.00946	1.30719
GO:0019953	sexual reproduction	108	6	4.71	1460	1	3.7e-06	0.41251	3.7e-06	1.27389
GO:1903312	negative regulation of mRNA metabolic process	36	2	1.57	1541	1	6e-05	0.87329	6e-05	1.27389
GO:0030902	hindbrain development	36	2	1.57	767	0.25158	0.00099	0.70161	0.00099	1.27389
GO:2000113	negative regulation of cellular macromolecule biosynthetic process	54	3	2.36	1488	1	1.1e-05	0.74929	1.1e-05	1.27119
GO:0021761	limbic system development	18	1	0.79	1740	1	0.00194	0.08631	0.00194	1.26582
GO:0033119	negative regulation of RNA splicing	18	1	0.79	1786	1	0.00295	0.85252	0.00295	1.26582
GO:0001508	action potential	18	1	0.79	1900	1	0.00859	0.47075	0.00859	1.26582
GO:0034645	cellular macromolecule biosynthetic process	182	10	7.94	1380	1	3.1e-09	0.5523	3.1e-09	1.25945
GO:0034249	negative regulation of cellular amide metabolic process	55	3	2.4	1497	1	1.9e-05	0.87656	1.9e-05	1.25
GO:1901991	negative regulation of mitotic cell cycle phase transition	37	2	1.61	1700	1	0.00129	0.23932	0.00129	1.24224
GO:0002696	positive regulation of leukocyte activation	37	2	1.61	1808	1	0.00409	0.35182	0.00409	1.24224
GO:0007346	regulation of mitotic cell cycle	112	6	4.89	1454	1	2.3e-06	0.2004	2.3e-06	1.22699
GO:2000112	regulation of cellular macromolecule biosynthetic process	114	6	4.97	1388	1	1.9e-08	0.47981	1.9e-08	1.20724
GO:0045931	positive regulation of mitotic cell cycle	38	2	1.66	813	0.30392	0.00046	0.18244	0.00046	1.20482
GO:0031349	positive regulation of defense response	38	2	1.66	1646	1	0.00057	0.00883	0.00057	1.20482
GO:1904377	positive regulation of protein localization to cell periphery	19	1	0.83	1128	0.49787	0.00146	0.54877	0.00146	1.20482
GO:0048167	regulation of synaptic plasticity	38	2	1.66	1155	0.53239	0.00273	0.73467	0.00273	1.20482
GO:0034605	cellular response to heat	19	1	0.83	1129	0.49787	0.00357	0.48679	0.00357	1.20482
GO:0051153	regulation of striated muscle cell differentiation	19	1	0.83	1130	0.49787	0.00704	0.74721	0.00704	1.20482
GO:2000736	regulation of stem cell differentiation	19	1	0.83	1904	1	0.00884	0.89522	0.00884	1.20482
GO:0010498	proteasomal protein catabolic process	96	5	4.19	1412	1	1.7e-07	0.99056	1.7e-07	1.19332
GO:1901988	negative regulation of cell cycle phase transition	58	3	2.53	1659	1	0.00072	0.38676	0.00072	1.18577
GO:0016236	macroautophagy	58	3	2.53	1798	1	0.00354	0.46029	0.00354	1.18577
GO:0030162	regulation of proteolysis	117	6	5.1	1624	1	0.00043	0.98572	0.00043	1.17647
GO:0051051	negative regulation of transport	79	4	3.45	1855	1	0.00642	0.52705	0.00642	1.15942
GO:0030516	regulation of axon extension	20	1	0.87	1539	1	5.7e-05	0.21421	5.7e-05	1.14943
GO:0050686	negative regulation of mRNA processing	20	1	0.87	1585	1	0.0002	0.76662	0.0002	1.14943
GO:0048469	cell maturation	20	1	0.87	1141	0.51578	0.00025	0.14204	0.00025	1.14943
GO:0061136	regulation of proteasomal protein catabolic process	40	2	1.74	1721	1	0.00155	0.75998	0.00155	1.14943
GO:0033120	positive regulation of RNA splicing	20	1	0.87	1753	1	0.00223	0.44097	0.00223	1.14943
GO:0099072	regulation of postsynaptic membrane neurotransmitter receptor levels	20	1	0.87	1142	0.51578	0.00296	0.17007	0.00296	1.14943
GO:0001704	formation of primary germ layer	20	1	0.87	1793	1	0.00333	0.887	0.00333	1.14943
GO:0045639	positive regulation of myeloid cell differentiation	20	1	0.87	1143	0.51578	0.00676	0.18685	0.00676	1.14943
GO:0044706	multi-multicellular organism process	20	1	0.87	1144	0.51578	0.0082	0.30916	0.0082	1.14943
GO:0001817	regulation of cytokine production	102	5	4.45	1574	1	0.00014	0.36636	0.00014	1.1236
GO:2000058	regulation of ubiquitin-dependent protein catabolic process	42	2	1.83	1750	1	0.00218	0.49832	0.00218	1.0929
GO:0031330	negative regulation of cellular catabolic process	63	3	2.75	1731	1	0.0017	0.79646	0.0017	1.09091
GO:0014902	myotube differentiation	21	1	0.92	1156	0.53305	0.0002	0.2462	0.0002	1.08696
GO:0071456	cellular response to hypoxia	21	1	0.92	1157	0.53305	0.0005	0.01261	0.0005	1.08696
GO:1904591	positive regulation of protein import	21	1	0.92	1806	1	0.00395	0.35591	0.00395	1.08696
GO:0070301	cellular response to hydrogen peroxide	21	1	0.92	1158	0.53305	0.0079	0.00898	0.0079	1.08696
GO:0010506	regulation of autophagy	65	3	2.84	575	0.12138	0.00105	0.62316	0.00105	1.05634
GO:0001890	placenta development	44	2	1.92	1076	0.41944	3.1e-06	0.16395	3.1e-06	1.04167
GO:0021700	developmental maturation	44	2	1.92	860	0.30418	3.7e-05	0.35625	3.7e-05	1.04167
GO:0006446	regulation of translational initiation	22	1	0.96	1166	0.54971	0.0006	0.79558	0.0006	1.04167
GO:0048284	organelle fusion	22	1	0.96	1807	1	0.00404	0.60698	0.00404	1.04167
GO:0006304	DNA modification	22	1	0.96	1840	1	0.00551	0.75301	0.00551	1.04167
GO:0061025	membrane fusion	22	1	0.96	1867	1	0.00686	0.60507	0.00686	1.04167
GO:0051090	regulation of DNA-binding transcription factor activity	89	4	3.88	1850	1	0.00608	0.59954	0.00608	1.03093
GO:0007160	cell-matrix adhesion	45	2	1.96	861	0.30422	0.00199	0.61412	0.00199	1.02041
GO:0061387	regulation of extent of cell growth	23	1	1	1498	1	2e-05	0.3724	2e-05	1
GO:0050905	neuromuscular process	23	1	1	1172	0.56578	0.00026	0.41432	0.00026	1
GO:0036294	cellular response to decreased oxygen levels	23	1	1	1710	1	0.0014	0.01325	0.0014	1
GO:0048640	negative regulation of developmental growth	23	1	1	1713	1	0.00144	0.26582	0.00144	1
GO:0042306	regulation of protein import into nucleus	23	1	1	1738	1	0.00188	0.31741	0.00188	1
GO:0001935	endothelial cell proliferation	23	1	1	1838	1	0.00544	0.56964	0.00544	1
GO:0070482	response to oxygen levels	48	2	2.09	1500	1	2.1e-05	0.04799	2.1e-05	0.956938
GO:0071326	cellular response to monosaccharide stimulus	24	1	1.05	1620	1	0.00041	0.03556	0.00041	0.952381
GO:0071331	cellular response to hexose stimulus	24	1	1.05	1621	1	0.00041	0.03556	0.00041	0.952381
GO:0071333	cellular response to glucose stimulus	24	1	1.05	1180	0.58128	0.00041	0.03556	0.00041	0.952381
GO:2000241	regulation of reproductive process	24	1	1.05	1697	1	0.00117	0.24625	0.00117	0.952381
GO:1903050	regulation of proteolysis involved in cellular protein catabolic process	50	2	2.18	1672	1	0.00091	0.51158	0.00091	0.917431
GO:1902414	protein localization to cell junction	25	1	1.09	1780	1	0.00281	0.60365	0.00281	0.917431
GO:0006954	inflammatory response	77	3	3.36	1202	0.73813	0.00107	0.27499	0.00107	0.892857
GO:0006979	response to oxidative stress	77	3	3.36	1776	1	0.00273	0.60691	0.00273	0.892857
GO:0010976	positive regulation of neuron projection development	52	2	2.27	1171	0.55706	0.00012	0.73982	0.00012	0.881057
GO:0001678	cellular glucose homeostasis	27	1	1.18	1606	1	0.00032	0.07669	0.00032	0.847458
GO:1904589	regulation of protein import	27	1	1.18	1717	1	0.00148	0.24226	0.00148	0.847458
GO:0043500	muscle adaptation	27	1	1.18	1872	1	0.00725	0.72886	0.00725	0.847458
GO:1903362	regulation of cellular protein catabolic process	55	2	2.4	1696	1	0.00114	0.65906	0.00114	0.833333
GO:0048675	axon extension	28	1	1.22	1471	1	5.5e-06	0.44452	5.5e-06	0.819672
GO:0071322	cellular response to carbohydrate stimulus	28	1	1.22	1518	1	3.2e-05	0.04171	3.2e-05	0.819672
GO:1901992	positive regulation of mitotic cell cycle phase transition	28	1	1.22	1617	1	0.00039	0.16296	0.00039	0.819672
GO:0051896	regulation of protein kinase B signaling	28	1	1.22	1188	0.63795	0.00229	0.42434	0.00229	0.819672
GO:0051046	regulation of secretion	85	3	3.71	546	0.10336	0.00519	0.28077	0.00519	0.808625
GO:0044770	cell cycle phase transition	116	4	5.06	1417	1	2.4e-07	0.27787	2.4e-07	0.790514
GO:0071356	cellular response to tumor necrosis factor	29	1	1.27	1577	1	0.00016	0.04141	0.00016	0.787402
GO:0001892	embryonic placenta development	29	1	1.27	1191	0.65089	0.00283	0.27134	0.00283	0.787402
GO:0010977	negative regulation of neuron projection development	30	1	1.31	1192	0.66336	5.2e-05	0.08989	5.2e-05	0.763359
GO:0034284	response to monosaccharide	30	1	1.31	1783	1	0.00291	0.05835	0.00291	0.763359
GO:0009746	response to hexose	30	1	1.31	1784	1	0.00291	0.05835	0.00291	0.763359
GO:0009749	response to glucose	30	1	1.31	1785	1	0.00291	0.05835	0.00291	0.763359
GO:0000956	nuclear-transcribed mRNA catabolic process	30	1	1.31	1884	1	0.00767	0.74685	0.00767	0.763359
GO:0071363	cellular response to growth factor stimulus	123	4	5.37	1387	1	9.1e-09	0.51053	9.1e-09	0.744879
GO:1901987	regulation of cell cycle phase transition	93	3	4.06	1521	1	3.4e-05	0.20989	3.4e-05	0.738916
GO:0070848	response to growth factor	129	4	5.63	1385	1	6.2e-09	0.42981	6.2e-09	0.71048
GO:0044772	mitotic cell cycle phase transition	97	3	4.23	1418	1	2.5e-07	0.16006	2.5e-07	0.70922
GO:0006413	translational initiation	33	1	1.44	1723	1	0.00156	0.95423	0.00156	0.694444
GO:0043491	protein kinase B signaling	33	1	1.44	1885	1	0.00784	0.506	0.00784	0.694444
GO:0071695	anatomical structure maturation	34	1	1.48	1586	1	0.0002	0.39359	0.0002	0.675676
GO:1901989	positive regulation of cell cycle phase transition	34	1	1.48	1626	1	0.00045	0.10303	0.00045	0.675676
GO:0034612	response to tumor necrosis factor	34	1	1.48	1693	1	0.00113	0.07242	0.00113	0.675676
GO:1904375	regulation of protein localization to cell periphery	35	1	1.53	1714	1	0.00145	0.21698	0.00145	0.653595
GO:0009743	response to carbohydrate	36	1	1.57	1705	1	0.00135	0.12453	0.00135	0.636943
GO:0015833	peptide transport	36	1	1.57	1201	0.72941	0.00582	0.55831	0.00582	0.636943
GO:1901990	regulation of mitotic cell cycle phase transition	73	2	3.18	1555	1	8.5e-05	0.10978	8.5e-05	0.628931
GO:0007254	JNK cascade	38	1	1.66	1754	1	0.00225	0.16201	0.00225	0.60241
GO:0042886	amide transport	38	1	1.66	1844	1	0.00586	0.55435	0.00586	0.60241
GO:1903530	regulation of secretion by cell	82	2	3.58	1890	1	0.00835	0.18838	0.00835	0.558659
GO:0001666	response to hypoxia	43	1	1.88	1510	1	2.8e-05	0.04728	2.8e-05	0.531915
GO:0036293	response to decreased oxygen levels	45	1	1.96	1523	1	3.5e-05	0.04512	3.5e-05	0.510204
GO:1903828	negative regulation of protein localization	48	1	2.09	1203	0.82529	0.00046	0.48984	0.00046	0.478469
GO:0090287	regulation of cellular response to growth factor stimulus	52	1	2.27	1676	1	0.00093	0.86478	0.00093	0.440529
GO:0007178	transmembrane receptor protein serine/threonine kinase signaling pathway	63	1	2.75	1529	1	4.7e-05	0.69656	4.7e-05	0.363636
GO:0010817	regulation of hormone levels	50	0	2.18	1592	1	0.00024	0.59842	0.00024	0
GO:0007179	transforming growth factor beta receptor signaling pathway	45	0	1.96	1661	1	0.00073	0.74866	0.00073	0
GO:0042752	regulation of circadian rhythm	21	0	0.92	1686	1	0.00106	0.26014	0.00106	0
GO:0023061	signal release	64	0	2.79	1691	1	0.00111	0.41981	0.00111	0
GO:0097305	response to alcohol	23	0	1	1739	1	0.00191	0.47085	0.00191	0
GO:0009914	hormone transport	38	0	1.66	1741	1	0.00196	0.3693	0.00196	0
GO:0046879	hormone secretion	38	0	1.66	1742	1	0.00196	0.3693	0.00196	0
GO:0071560	cellular response to transforming growth factor beta stimulus	55	0	2.4	1747	1	0.00209	0.66349	0.00209	0
GO:0051224	negative regulation of protein transport	25	0	1.09	1748	1	0.00216	0.59313	0.00216	0
GO:0002532	production of molecular mediator involved in inflammatory response	15	0	0.65	1760	1	0.00246	0.06699	0.00246	0
GO:0010718	positive regulation of epithelial to mesenchymal transition	11	0	0.48	1763	1	0.00251	0.01768	0.00251	0
GO:1900181	negative regulation of protein localization to nucleus	13	0	0.57	1775	1	0.00273	0.18367	0.00273	0
GO:0071559	response to transforming growth factor beta	56	0	2.44	1781	1	0.00285	0.72401	0.00285	0
GO:0015850	organic hydroxy compound transport	19	0	0.83	1790	1	0.00329	0.09541	0.00329	0
GO:1903078	positive regulation of protein localization to plasma membrane	15	0	0.65	1813	1	0.0043	0.46152	0.0043	0
GO:0006694	steroid biosynthetic process	16	0	0.7	1815	1	0.00431	0.05518	0.00431	0
GO:0097194	execution phase of apoptosis	10	0	0.44	1831	1	0.00499	0.06688	0.00499	0
GO:0097306	cellular response to alcohol	15	0	0.65	1832	1	0.00506	0.54979	0.00506	0
GO:0042789	mRNA transcription by RNA polymerase II	11	0	0.48	1835	1	0.00521	0.52541	0.00521	0
GO:0007492	endoderm development	16	0	0.7	1878	1	0.00749	0.12857	0.00749	0
GO:0035249	synaptic transmission, glutamatergic	14	0	0.61	1883	1	0.00766	0.85217	0.00766	0
GO:0006368	transcription elongation from RNA polymerase II promoter	19	0	0.83	1889	1	0.00829	0.59577	0.00829	0
GO:0035418	protein localization to synapse	13	0	0.57	1892	1	0.00842	0.8865	0.00842	0
GO:1904950	negative regulation of establishment of protein localization	27	0	1.18	1898	1	0.00855	0.59072	0.00855	0
GO:0000768	syncytium formation by plasma membrane fusion	12	0	0.52	1907	1	0.00909	0.28495	0.00909	0
GO:0006949	syncytium formation	12	0	0.52	1908	1	0.00909	0.28495	0.00909	0
GO:0140253	cell-cell fusion	12	0	0.52	1909	1	0.00909	0.28495	0.00909	0
GO:1903076	regulation of protein localization to plasma membrane	28	0	1.22	1917	1	0.00953	0.52544	0.00953	0

## Sheet: Clusters for enriched GO terms
V1	V2	term	cluster	parent	parentTerm	size	GOID	escore	classicKS	branch	clust.x	clust.y
-0.33652	0.196473	phosphorylation	10	GO:0006793	phosphorus metabolic process	598	GO:0016310	1.72096	< 1e-30	1	-0.356723	0.174624
-0.393235	0.227581	cellular aromatic compound metabolic process	12	GO:0044267	cellular protein metabolic process	6	GO:0006725	2.27548	< 1e-30	1	-0.356723	0.174624
0.0258114	-0.0687807	cell cycle process	24	GO:0022402	cell cycle process	0	GO:0022402	2.54609	< 1e-30	2	0.0154734	-0.10849
0.00811063	-0.0355062	cellular process	33	GO:0009987	cellular process	0	GO:0009987	2.3349	< 1e-30	2	0.0154734	-0.10849
-0.428662	0.2738	protein metabolic process	12	GO:0044267	cellular protein metabolic process	14	GO:0019538	2.15172	< 1e-30	1	-0.356723	0.174624
0.0414843	-0.235793	cellular response to chemical stimulus	2	GO:0070887	cellular response to chemical stimulus	0	GO:0070887	2.15054	< 1e-30	2	0.0154734	-0.10849
-0.448581	0.174665	regulation of RNA metabolic process	12	GO:0044267	cellular protein metabolic process	12	GO:0051252	2.12996	< 1e-30	1	-0.356723	0.174624
-0.419703	0.141374	positive regulation of RNA metabolic process	8	GO:0010604	positive regulation of macromolecule metabolic process	0	GO:0051254	2.04756	< 1e-30	1	-0.356723	0.174624
-0.370953	0.235825	macromolecule modification	6	GO:0036211	protein modification process	0	GO:0043412	2.33133	< 1e-30	1	-0.356723	0.174624
-0.433313	0.254695	nucleic acid metabolic process	12	GO:0044267	cellular protein metabolic process	0	GO:0090304	2.28733	< 1e-30	1	-0.356723	0.174624
0.0643286	-0.229833	response to organic substance	2	GO:0070887	cellular response to chemical stimulus	62	GO:0010033	2.04878	< 1e-30	2	0.0154734	-0.10849
-0.401375	0.254072	organic cyclic compound metabolic process	12	GO:0044267	cellular protein metabolic process	3	GO:1901360	2.23756	< 1e-30	1	-0.356723	0.174624
-0.418514	0.265527	organic cyclic compound biosynthetic process	14	GO:0009059	macromolecule biosynthetic process	0	GO:1901362	2.02166	< 1e-30	1	-0.356723	0.174624
-0.435333	0.189544	regulation of protein metabolic process	23	GO:0032268	regulation of cellular protein metabolic process	13	GO:0051246	1.86448	< 1e-30	1	-0.356723	0.174624
0.0851877	-0.0938636	cytoskeleton organization	25	GO:0007010	cytoskeleton organization	127	GO:0007010	2.93138	< 1e-30	2	0.0154734	-0.10849
0.0853539	-0.397604	establishment of localization	15	GO:0051179	localization	1	GO:0051234	2.29601	< 1e-30	3	0.060492	-0.328451
0.188157	0.11949	regulation of multicellular organismal process	30	GO:0051239	regulation of multicellular organismal process	0	GO:0051239	2.63007	< 1e-30	4	0.314749	0.225188
0.0698301	-0.338028	cell migration	19	GO:0048870	cell motility	328	GO:0016477	2.78012	< 1e-30	3	0.060492	-0.328451
0.0245943	-0.0678399	cell cycle	24	GO:0022402	cell cycle process	626	GO:0007049	2.48636	< 1e-30	2	0.0154734	-0.10849
-0.409828	0.159311	regulation of primary metabolic process	12	GO:0044267	cellular protein metabolic process	0	GO:0080090	1.96831	< 1e-30	1	-0.356723	0.174624
-0.425272	0.178917	regulation of macromolecule biosynthetic process	14	GO:0009059	macromolecule biosynthetic process	0	GO:0010556	1.86949	< 1e-30	1	-0.356723	0.174624
0.0854335	-0.398737	transport	15	GO:0051179	localization	36	GO:0006810	2.21157	< 1e-30	3	0.060492	-0.328451
-0.410014	0.240242	heterocycle biosynthetic process	14	GO:0009059	macromolecule biosynthetic process	0	GO:0018130	2.06034	< 1e-30	1	-0.356723	0.174624
-0.396406	0.251775	macromolecule metabolic process	12	GO:0044267	cellular protein metabolic process	0	GO:0043170	2.18237	< 1e-30	1	-0.356723	0.174624
-0.402205	0.255345	nitrogen compound metabolic process	12	GO:0044267	cellular protein metabolic process	23	GO:0006807	2.2065	< 1e-30	1	-0.356723	0.174624
0.0828077	-0.374182	vesicle-mediated transport	18	GO:0016192	vesicle-mediated transport	277	GO:0016192	2.3622	< 1e-30	3	0.060492	-0.328451
0.384687	0.305268	cell development	22	GO:0048468	cell development	39	GO:0048468	2.63775	< 1e-30	4	0.314749	0.225188
-0.404295	0.234664	cellular macromolecule metabolic process	12	GO:0044267	cellular protein metabolic process	2	GO:0044260	2.22222	< 1e-30	1	-0.356723	0.174624
-0.42883	0.252492	cellular protein metabolic process	12	GO:0044267	cellular protein metabolic process	11	GO:0044267	2.12034	< 1e-30	1	-0.356723	0.174624
0.0300529	-0.215219	cellular response to stimulus	4	GO:0050896	response to stimulus	0	GO:0051716	2.34121	< 1e-30	2	0.0154734	-0.10849
0.0975276	-0.0741918	cell projection organization	16	GO:0120036	plasma membrane bounded cell projection organization	200	GO:0030030	2.34009	< 1e-30	2	0.0154734	-0.10849
-0.426838	0.250748	cellular nitrogen compound biosynthetic process	14	GO:0009059	macromolecule biosynthetic process	0	GO:0044271	1.92069	< 1e-30	1	-0.356723	0.174624
-0.430911	0.169691	regulation of cellular protein metabolic process	23	GO:0032268	regulation of cellular protein metabolic process	8	GO:0032268	1.83398	< 1e-30	1	-0.356723	0.174624
-0.33722	0.19639	cellular catabolic process	17	GO:1901575	organic substance catabolic process	0	GO:0044248	1.95667	< 1e-30	1	-0.356723	0.174624
-0.374467	0.218132	cellular biosynthetic process	14	GO:0009059	macromolecule biosynthetic process	3	GO:0044249	1.82025	< 1e-30	1	-0.356723	0.174624
-0.364923	0.209172	cellular metabolic process	12	GO:0044267	cellular protein metabolic process	12	GO:0044237	2.22364	< 1e-30	1	-0.356723	0.174624
-0.385968	0.245547	primary metabolic process	12	GO:0044267	cellular protein metabolic process	0	GO:0044238	2.16145	< 1e-30	1	-0.356723	0.174624
0.0634953	-0.0715354	locomotion	38	GO:0040011	locomotion	14	GO:0040011	2.87443	< 1e-30	3	0.060492	-0.328451
-0.0542595	-0.148466	regulation of cell communication	31	GO:0007154	cell communication	2	GO:0010646	2.04168	< 1e-30	2	0.0154734	-0.10849
-0.387117	0.126573	positive regulation of macromolecule metabolic process	8	GO:0010604	positive regulation of macromolecule metabolic process	0	GO:0010604	2.16606	< 1e-30	1	-0.356723	0.174624
-0.385408	0.134313	negative regulation of macromolecule metabolic process	13	GO:0048523	negative regulation of cellular process	0	GO:0010605	2.00087	< 1e-30	1	-0.356723	0.174624
-0.393483	0.227723	heterocycle metabolic process	12	GO:0044267	cellular protein metabolic process	3	GO:0046483	2.28045	< 1e-30	1	-0.356723	0.174624
0.0977551	-0.073771	plasma membrane bounded cell projection organization	16	GO:0120036	plasma membrane bounded cell projection organization	1	GO:0120036	2.29976	< 1e-30	2	0.0154734	-0.10849
0.0638593	-0.22895	response to chemical	2	GO:0070887	cellular response to chemical stimulus	0	GO:0042221	2.23941	< 1e-30	2	0.0154734	-0.10849
-0.355	0.11148	negative regulation of metabolic process	13	GO:0048523	negative regulation of cellular process	1	GO:0009892	1.94411	< 1e-30	1	-0.356723	0.174624
-0.356523	0.103308	positive regulation of metabolic process	8	GO:0010604	positive regulation of macromolecule metabolic process	0	GO:0009893	2.20115	< 1e-30	1	-0.356723	0.174624
-0.451172	0.267672	nucleic acid-templated transcription	14	GO:0009059	macromolecule biosynthetic process	0	GO:0097659	2.00984	< 1e-30	1	-0.356723	0.174624
-0.445028	0.263374	RNA biosynthetic process	14	GO:0009059	macromolecule biosynthetic process	0	GO:0032774	2.03583	< 1e-30	1	-0.356723	0.174624
-0.0350758	-0.149423	regulation of signaling	32	GO:0007165	signal transduction	5	GO:0023051	2.02276	< 1e-30	2	0.0154734	-0.10849
0.0341006	-0.127208	signaling	32	GO:0007165	signal transduction	7	GO:0023052	2.21591	< 1e-30	2	0.0154734	-0.10849
0.0835934	-0.387359	organic substance transport	15	GO:0051179	localization	6	GO:0071702	2.34467	< 1e-30	3	0.060492	-0.328451
-0.367856	0.234794	organic substance metabolic process	12	GO:0044267	cellular protein metabolic process	5	GO:0071704	2.15156	< 1e-30	1	-0.356723	0.174624
0.0826213	-0.381076	nitrogen compound transport	15	GO:0051179	localization	3	GO:0071705	2.42656	< 1e-30	3	0.060492	-0.328451
0.392527	0.303186	tissue development	29	GO:0009888	tissue development	43	GO:0009888	2.59209	< 1e-30	4	0.314749	0.225188
-0.397033	0.1583	regulation of biosynthetic process	14	GO:0009059	macromolecule biosynthetic process	0	GO:0009889	1.83924	< 1e-30	1	-0.356723	0.174624
0.459044	0.357725	nervous system development	9	GO:0030182	neuron differentiation	448	GO:0007399	2.42254	< 1e-30	4	0.314749	0.225188
-0.321702	0.204461	catabolic process	17	GO:1901575	organic substance catabolic process	1	GO:0009056	2.10657	< 1e-30	1	-0.356723	0.174624
-0.360345	0.229553	biosynthetic process	14	GO:0009059	macromolecule biosynthetic process	37	GO:0009058	1.85956	< 1e-30	1	-0.356723	0.174624
-0.401574	0.255322	macromolecule biosynthetic process	14	GO:0009059	macromolecule biosynthetic process	0	GO:0009059	1.83515	< 1e-30	1	-0.356723	0.174624
-0.409549	0.239937	aromatic compound biosynthetic process	14	GO:0009059	macromolecule biosynthetic process	1	GO:0019438	2.05429	< 1e-30	1	-0.356723	0.174624
0.0835407	-0.0854354	cellular component organization or biogenesis	25	GO:0007010	cytoskeleton organization	0	GO:0071840	2.44655	< 1e-30	2	0.0154734	-0.10849
-0.432231	0.2566	transcription by RNA polymerase II	14	GO:0009059	macromolecule biosynthetic process	117	GO:0006366	1.96937	< 1e-30	1	-0.356723	0.174624
-0.451133	0.267649	transcription, DNA-templated	14	GO:0009059	macromolecule biosynthetic process	104	GO:0006351	2.01315	< 1e-30	1	-0.356723	0.174624
0.0835352	-0.0875692	cellular component biogenesis	26	GO:0051128	regulation of cellular component organization	0	GO:0044085	2.76923	< 1e-30	2	0.0154734	-0.10849
-0.468344	0.190154	regulation of transcription, DNA-templated	14	GO:0009059	macromolecule biosynthetic process	1155	GO:0006355	1.98816	< 1e-30	1	-0.356723	0.174624
-0.396852	0.250848	gene expression	21	GO:0010468	regulation of gene expression	209	GO:0010467	2.01856	< 1e-30	1	-0.356723	0.174624
-0.415655	0.166797	regulation of gene expression	21	GO:0010468	regulation of gene expression	484	GO:0010468	1.92252	< 1e-30	1	-0.356723	0.174624
-0.415507	0.137033	positive regulation of nucleobase-containing compound metabolic process	8	GO:0010604	positive regulation of macromolecule metabolic process	0	GO:0045935	2.18894	< 1e-30	1	-0.356723	0.174624
0.0833357	-0.391193	macromolecule localization	36	GO:0008104	protein localization	1	GO:0033036	2.41935	< 1e-30	3	0.060492	-0.328451
-0.418318	0.267452	protein modification process	6	GO:0036211	protein modification process	1	GO:0036211	2.28893	< 1e-30	1	-0.356723	0.174624
0.0109062	-0.395518	regulation of localization	15	GO:0051179	localization	1	GO:0032879	2.51451	< 1e-30	3	0.060492	-0.328451
0.43832	0.352365	neurogenesis	9	GO:0030182	neuron differentiation	81	GO:0022008	2.3639	< 1e-30	4	0.314749	0.225188
0.0633384	-0.33103	localization of cell	19	GO:0048870	cell motility	0	GO:0051674	2.72436	< 1e-30	3	0.060492	-0.328451
0.0609096	-0.373325	cellular localization	5	GO:0070727	cellular macromolecule localization	2	GO:0051641	2.37288	< 1e-30	3	0.060492	-0.328451
0.0630658	-0.38843	establishment of localization in cell	5	GO:0070727	cellular macromolecule localization	15	GO:0051649	2.48447	< 1e-30	3	0.060492	-0.328451
-0.422028	0.249226	cellular protein modification process	6	GO:0036211	protein modification process	45	GO:0006464	2.28893	< 1e-30	1	-0.356723	0.174624
-0.430243	0.256496	protein phosphorylation	10	GO:0006793	phosphorus metabolic process	794	GO:0006468	1.79558	< 1e-30	1	-0.356723	0.174624
0.463683	0.363663	system development	28	GO:0048513	animal organ development	2	GO:0048731	2.59297	< 1e-30	4	0.314749	0.225188
-0.348749	0.222267	metabolic process	12	GO:0044267	cellular protein metabolic process	178	GO:0008152	2.20305	< 1e-30	1	-0.356723	0.174624
-0.430703	0.253137	RNA metabolic process	12	GO:0044267	cellular protein metabolic process	11	GO:0016070	2.2063	< 1e-30	1	-0.356723	0.174624
-0.371043	0.217397	mRNA metabolic process	42	GO:0016071	mRNA metabolic process	7	GO:0016071	2.73834	< 1e-30	1	-0.356723	0.174624
-0.436146	0.257797	nucleobase-containing compound biosynthetic process	14	GO:0009059	macromolecule biosynthetic process	0	GO:0034654	2.07715	< 1e-30	1	-0.356723	0.174624
0.416223	0.322553	anatomical structure morphogenesis	41	GO:0009653	anatomical structure morphogenesis	72	GO:0009653	2.5522	< 1e-30	4	0.314749	0.225188
0.0843553	-0.0859691	cellular component organization	25	GO:0007010	cytoskeleton organization	10	GO:0016043	2.50865	< 1e-30	2	0.0154734	-0.10849
-0.380273	0.136626	regulation of metabolic process	12	GO:0044267	cellular protein metabolic process	26	GO:0019222	1.99739	< 1e-30	1	-0.356723	0.174624
0.0637965	-0.389078	cellular protein localization	5	GO:0070727	cellular macromolecule localization	103	GO:0034613	2.22659	< 1e-30	3	0.060492	-0.328451
-0.443785	0.170122	regulation of nucleobase-containing compound metabolic process	12	GO:0044267	cellular protein metabolic process	0	GO:0019219	2.10181	< 1e-30	1	-0.356723	0.174624
-0.413509	0.240454	cellular nitrogen compound metabolic process	12	GO:0044267	cellular protein metabolic process	0	GO:0034641	2.22272	< 1e-30	1	-0.356723	0.174624
-0.0436307	-0.248089	signal transduction	32	GO:0007165	signal transduction	1231	GO:0007165	2.33475	< 1e-30	2	0.0154734	-0.10849
-0.0337797	-0.236798	cell surface receptor signaling pathway	37	GO:0007166	cell surface receptor signaling pathway	219	GO:0007166	2.07824	< 1e-30	2	0.0154734	-0.10849
0.0851584	-0.0920156	organelle organization	25	GO:0007010	cytoskeleton organization	15	GO:0006996	2.60278	< 1e-30	2	0.0154734	-0.10849
0.0113001	-0.125186	cell communication	31	GO:0007154	cell communication	37	GO:0007154	2.21661	< 1e-30	2	0.0154734	-0.10849
0.381001	0.305352	cellular developmental process	22	GO:0048468	cell development	1	GO:0048869	2.41296	< 1e-30	4	0.314749	0.225188
0.287541	0.196453	multicellular organismal process	39	GO:0032501	multicellular organismal process	0	GO:0032501	2.56837	< 1e-30	4	0.314749	0.225188
0.392645	0.303423	developmental process	28	GO:0048513	animal organ development	23	GO:0032502	2.41916	< 1e-30	4	0.314749	0.225188
0.40909	0.318804	anatomical structure development	28	GO:0048513	animal organ development	67	GO:0048856	2.51078	< 1e-30	4	0.314749	0.225188
0.0829582	-0.389868	protein localization	36	GO:0008104	protein localization	112	GO:0008104	2.4988	< 1e-30	3	0.060492	-0.328451
0.0696964	-0.340056	cell motility	19	GO:0048870	cell motility	38	GO:0048870	2.72436	< 1e-30	3	0.060492	-0.328451
0.0599492	-0.192941	response to external stimulus	7	GO:0009605	response to external stimulus	0	GO:0009605	1.9816	< 1e-30	2	0.0154734	-0.10849
-0.0435653	-0.0845982	biological regulation	20	GO:0050789	regulation of biological process	0	GO:0065007	2.29967	< 1e-30	1	-0.356723	0.174624
-0.0202162	-0.0848728	regulation of biological quality	40	GO:0065008	regulation of biological quality	0	GO:0065008	2.25094	< 1e-30	2	0.0154734	-0.10849
-0.0310448	-0.0858095	regulation of molecular function	27	GO:0065009	regulation of molecular function	0	GO:0065009	2.2439	< 1e-30	2	0.0154734	-0.10849
0.0543272	-0.199626	response to stress	11	GO:0006950	response to stress	6	GO:0006950	2.26446	< 1e-30	2	0.0154734	-0.10849
-0.465374	0.187886	regulation of RNA biosynthetic process	14	GO:0009059	macromolecule biosynthetic process	4	GO:2001141	1.98062	< 1e-30	1	-0.356723	0.174624
-0.412845	0.161205	regulation of macromolecule metabolic process	12	GO:0044267	cellular protein metabolic process	0	GO:0060255	1.96347	< 1e-30	1	-0.356723	0.174624
0.0420192	-0.0761808	movement of cell or subcellular component	3	GO:0006928	movement of cell or subcellular component	13	GO:0006928	2.80255	< 1e-30	3	0.060492	-0.328451
0.0842182	-0.0880308	cellular component assembly	26	GO:0051128	regulation of cellular component organization	1	GO:0022607	2.89292	< 1e-30	2	0.0154734	-0.10849
0.287508	0.221134	regulation of developmental process	1	GO:0050793	regulation of developmental process	5	GO:0050793	2.34814	< 1e-30	4	0.314749	0.225188
-0.0784328	-0.0963174	regulation of cellular process	20	GO:0050789	regulation of biological process	0	GO:0050794	2.28476	< 1e-30	1	-0.356723	0.174624
-0.466834	0.189133	regulation of nucleic acid-templated transcription	14	GO:0009059	macromolecule biosynthetic process	2	GO:1903506	1.98396	< 1e-30	1	-0.356723	0.174624
-0.0555582	-0.0915076	regulation of biological process	20	GO:0050789	regulation of biological process	0	GO:0050789	2.27774	< 1e-30	1	-0.356723	0.174624
-0.427564	0.251022	nucleobase-containing compound metabolic process	12	GO:0044267	cellular protein metabolic process	29	GO:0006139	2.29717	< 1e-30	1	-0.356723	0.174624
0.381174	0.305479	cell differentiation	22	GO:0048468	cell development	1025	GO:0030154	2.4	< 1e-30	4	0.314749	0.225188
0.433434	0.346881	neuron differentiation	9	GO:0030182	neuron differentiation	205	GO:0030182	2.04604	< 1e-30	4	0.314749	0.225188
-0.0189138	-0.223883	regulation of response to stimulus	34	GO:0048583	regulation of response to stimulus	0	GO:0048583	2.26923	< 1e-30	2	0.0154734	-0.10849
0.452948	0.353766	multicellular organism development	28	GO:0048513	animal organ development	1092	GO:0007275	2.59248	< 1e-30	4	0.314749	0.225188
-0.0535624	-0.197896	negative regulation of response to stimulus	34	GO:0048583	regulation of response to stimulus	0	GO:0048585	2.8777	< 1e-30	2	0.0154734	-0.10849
-0.420172	0.267976	organonitrogen compound metabolic process	12	GO:0044267	cellular protein metabolic process	0	GO:1901564	2.15883	< 1e-30	1	-0.356723	0.174624
-0.0913279	-0.101522	positive regulation of cellular process	8	GO:0010604	positive regulation of macromolecule metabolic process	0	GO:0048522	2.27327	< 1e-30	1	-0.356723	0.174624
-0.101348	-0.0836351	negative regulation of cellular process	13	GO:0048523	negative regulation of cellular process	0	GO:0048523	2.10835	< 1e-30	1	-0.356723	0.174624
0.419521	0.329845	animal organ development	28	GO:0048513	animal organ development	22	GO:0048513	2.77296	< 1e-30	4	0.314749	0.225188
-0.0730181	-0.0967751	positive regulation of biological process	8	GO:0010604	positive regulation of macromolecule metabolic process	0	GO:0048518	2.21057	< 1e-30	1	-0.356723	0.174624
-0.333479	0.212178	organic substance catabolic process	17	GO:1901575	organic substance catabolic process	0	GO:1901575	2.09111	< 1e-30	1	-0.356723	0.174624
-0.0849091	-0.0781756	negative regulation of biological process	13	GO:0048523	negative regulation of cellular process	0	GO:0048519	2.2327	< 1e-30	1	-0.356723	0.174624
-0.376737	0.240306	organic substance biosynthetic process	14	GO:0009059	macromolecule biosynthetic process	0	GO:1901576	1.86125	< 1e-30	1	-0.356723	0.174624
0.0563379	-0.20496	response to stimulus	4	GO:0050896	response to stimulus	224	GO:0050896	2.32607	< 1e-30	2	0.0154734	-0.10849
0.0427927	-0.236891	cellular response to organic substance	2	GO:0070887	cellular response to chemical stimulus	43	GO:0071310	2.00114	< 1e-30	2	0.0154734	-0.10849
0.435151	0.348865	generation of neurons	9	GO:0030182	neuron differentiation	17	GO:0048699	2.2113	< 1e-30	4	0.314749	0.225188
-0.0325839	-0.239903	intracellular signal transduction	35	GO:0035556	intracellular signal transduction	505	GO:0035556	2.40269	< 1e-30	2	0.0154734	-0.10849
0.0636571	-0.387302	cellular macromolecule localization	5	GO:0070727	cellular macromolecule localization	0	GO:0070727	2.21498	< 1e-30	3	0.060492	-0.328451
-0.348727	0.20368	phosphorus metabolic process	10	GO:0006793	phosphorus metabolic process	2	GO:0006793	2.0572	< 1e-30	1	-0.356723	0.174624
-0.421916	0.168134	regulation of nitrogen compound metabolic process	12	GO:0044267	cellular protein metabolic process	2	GO:0051171	1.96937	< 1e-30	1	-0.356723	0.174624
-0.392493	0.140393	negative regulation of nitrogen compound metabolic process	13	GO:0048523	negative regulation of cellular process	0	GO:0051172	2.08839	< 1e-30	1	-0.356723	0.174624
-0.39523	0.133384	positive regulation of nitrogen compound metabolic process	8	GO:0010604	positive regulation of macromolecule metabolic process	3	GO:0051173	2.19992	< 1e-30	1	-0.356723	0.174624
-0.348603	0.203651	phosphate-containing compound metabolic process	10	GO:0006793	phosphorus metabolic process	10	GO:0006796	2.06134	< 1e-30	1	-0.356723	0.174624
0.290391	0.2314	regulation of cell differentiation	1	GO:0050793	regulation of developmental process	42	GO:0045595	2.33333	< 1e-30	4	0.314749	0.225188
0.0838608	-0.379267	localization	15	GO:0051179	localization	0	GO:0051179	2.50387	< 1e-30	3	0.060492	-0.328451
0.0166628	-0.128298	regulation of cellular component organization	26	GO:0051128	regulation of cellular component organization	3	GO:0051128	2.49221	< 1e-30	2	0.0154734	-0.10849
-0.391257	0.126985	regulation of cellular metabolic process	12	GO:0044267	cellular protein metabolic process	5	GO:0031323	1.93563	< 1e-30	1	-0.356723	0.174624
-0.364643	0.10397	negative regulation of cellular metabolic process	13	GO:0048523	negative regulation of cellular process	0	GO:0031324	1.94896	< 1e-30	1	-0.356723	0.174624
-0.367065	0.0953323	positive regulation of cellular metabolic process	8	GO:0010604	positive regulation of macromolecule metabolic process	0	GO:0031325	2.0841	< 1e-30	1	-0.356723	0.174624
-0.409013	0.147249	regulation of cellular biosynthetic process	14	GO:0009059	macromolecule biosynthetic process	0	GO:0031326	1.80618	< 1e-30	1	-0.356723	0.174624
-0.0364441	-0.252567	regulation of signal transduction	31	GO:0007154	cell communication	54	GO:0009966	2.13169	< 1e-30	2	0.0154734	-0.10849
-0.41734	0.159204	positive regulation of protein metabolic process	23	GO:0032268	regulation of cellular protein metabolic process	10	GO:0051247	2.05128	1.1e-16	1	-0.356723	0.174624
-0.39781	0.152328	negative regulation of macromolecule biosynthetic process	13	GO:0048523	negative regulation of cellular process	0	GO:0010558	2.13523	1.1e-16	1	-0.356723	0.174624
0.0823687	-0.0848679	protein-containing complex organization	44	GO:0065003	protein-containing complex assembly	3	GO:0043933	2.83889	1.1e-16	2	0.0154734	-0.10849
0.405241	0.310225	embryo development	43	GO:0009790	embryo development	72	GO:0009790	2.55732	1.1e-16	4	0.314749	0.225188
0.0891001	-0.00247706	immune system process	45	GO:0002376	immune system process	506	GO:0002376	2.40642	1.1e-16	4	0.314749	0.225188
-0.372351	0.133562	negative regulation of biosynthetic process	13	GO:0048523	negative regulation of cellular process	3	GO:0009890	2.06469	1.1e-16	1	-0.356723	0.174624
0.067695	-0.00718508	reproduction	46	GO:0000003	reproduction	2	GO:0000003	1.76406	1.1e-16	4	0.314749	0.225188
0.0837058	-0.0891976	protein-containing complex assembly	44	GO:0065003	protein-containing complex assembly	118	GO:0065003	3.07942	1.1e-16	2	0.0154734	-0.10849
0.0183858	-0.0513103	cell death	47	GO:0008219	cell death	40	GO:0008219	2.34957	1.1e-16	2	0.0154734	-0.10849
0.431976	0.344906	neuron development	9	GO:0030182	neuron differentiation	73	GO:0048666	2.19342	1.1e-16	4	0.314749	0.225188
-0.383498	0.124603	negative regulation of cellular biosynthetic process	13	GO:0048523	negative regulation of cellular process	0	GO:0031327	2.10379	1.1e-16	1	-0.356723	0.174624
-0.414131	0.140916	positive regulation of cellular protein metabolic process	23	GO:0032268	regulation of cellular protein metabolic process	16	GO:0032270	1.92901	2.2e-16	1	-0.356723	0.174624
-0.0272833	-0.0838256	positive regulation of molecular function	27	GO:0065009	regulation of molecular function	1	GO:0044093	2.20197	3.3e-16	2	0.0154734	-0.10849
-0.450739	0.184204	regulation of transcription by RNA polymerase II	14	GO:0009059	macromolecule biosynthetic process	1755	GO:0006357	1.90583	3.3e-16	1	-0.356723	0.174624
0.0677012	-0.00717938	reproductive process	46	GO:0000003	reproduction	12	GO:0022414	1.77976	3.3e-16	4	0.314749	0.225188
-0.0683159	-0.227792	negative regulation of signal transduction	31	GO:0007154	cell communication	56	GO:0009968	2.83912	4.4e-16	2	0.0154734	-0.10849
0.0555688	-0.18963	response to endogenous stimulus	48	GO:0009719	response to endogenous stimulus	0	GO:0009719	1.94004	4.4e-16	2	0.0154734	-0.10849
-0.0120483	-0.0809489	homeostatic process	40	GO:0065008	regulation of biological quality	6	GO:0042592	2.61927	8.9e-16	2	0.0154734	-0.10849
-0.37092	0.125166	positive regulation of biosynthetic process	8	GO:0010604	positive regulation of macromolecule metabolic process	0	GO:0009891	2.07346	1.1e-15	1	-0.356723	0.174624
-0.437097	0.155109	positive regulation of RNA biosynthetic process	8	GO:0010604	positive regulation of macromolecule metabolic process	2	GO:1902680	2.00893	1.1e-15	1	-0.356723	0.174624
0.0220558	-0.401204	regulation of protein localization	36	GO:0008104	protein localization	127	GO:0032880	2.23881	1.2e-15	3	0.060492	-0.328451
0.454464	0.271061	neuron projection development	9	GO:0030182	neuron differentiation	197	GO:0031175	2.17842	1.4e-15	4	0.314749	0.225188
0.0838506	-0.401876	establishment of protein localization	36	GO:0008104	protein localization	52	GO:0045184	2.67062	1.4e-15	3	0.060492	-0.328451
-0.351221	0.222454	macromolecule catabolic process	17	GO:1901575	organic substance catabolic process	0	GO:0009057	2.07581	1.6e-15	1	-0.356723	0.174624
-0.43849	0.156315	positive regulation of nucleic acid-templated transcription	8	GO:0010604	positive regulation of macromolecule metabolic process	1	GO:1903508	2.01643	1.9e-15	1	-0.356723	0.174624
-0.439858	0.157155	positive regulation of transcription, DNA-templated	8	GO:0010604	positive regulation of macromolecule metabolic process	885	GO:0045893	2.01643	1.9e-15	1	-0.356723	0.174624
-0.381947	0.115308	positive regulation of cellular biosynthetic process	8	GO:0010604	positive regulation of macromolecule metabolic process	4	GO:0031328	1.99637	2.1e-15	1	-0.356723	0.174624
0.0266327	-0.0674922	mitotic cell cycle	24	GO:0022402	cell cycle process	130	GO:0000278	1.83784	2.3e-15	2	0.0154734	-0.10849
0.0331982	-0.20564	cellular response to stress	11	GO:0006950	response to stress	16	GO:0033554	2.29192	3.9e-15	2	0.0154734	-0.10849
-0.00592312	-0.131196	positive regulation of cellular component organization	26	GO:0051128	regulation of cellular component organization	1	GO:0051130	2.48075	4.6e-15	2	0.0154734	-0.10849
0.386756	0.293112	cell morphogenesis	41	GO:0009653	anatomical structure morphogenesis	110	GO:0000902	2.75591	4.9e-15	4	0.314749	0.225188
0.0633099	-0.382942	intracellular transport	5	GO:0070727	cellular macromolecule localization	24	GO:0046907	2.52454	5.1e-15	3	0.060492	-0.328451
0.0848323	-0.408351	protein transport	36	GO:0008104	protein localization	633	GO:0015031	2.58216	6.3e-15	3	0.060492	-0.328451
-0.416311	0.148299	negative regulation of RNA metabolic process	13	GO:0048523	negative regulation of cellular process	0	GO:0051253	2.25564	6.4e-15	1	-0.356723	0.174624
-0.396536	0.144271	positive regulation of macromolecule biosynthetic process	8	GO:0010604	positive regulation of macromolecule metabolic process	1	GO:0010557	1.93146	7.5e-15	1	-0.356723	0.174624
-0.369357	0.13598	regulation of phosphorylation	10	GO:0006793	phosphorus metabolic process	19	GO:0042325	1.75601	8.1e-15	1	-0.356723	0.174624
-0.083504	-0.132021	negative regulation of cell communication	31	GO:0007154	cell communication	0	GO:0010648	2.64447	9.7e-15	2	0.0154734	-0.10849
-0.0678469	-0.132151	negative regulation of signaling	32	GO:0007165	signal transduction	1	GO:0023057	2.64447	9.7e-15	2	0.0154734	-0.10849
-0.369089	0.132805	negative regulation of gene expression	13	GO:0048523	negative regulation of cellular process	431	GO:0010629	1.76349	1.2e-14	1	-0.356723	0.174624
-0.0287576	-0.0838554	regulation of catalytic activity	27	GO:0065009	regulation of molecular function	28	GO:0050790	2.23124	1.2e-14	2	0.0154734	-0.10849
0.0554624	-0.188386	cellular response to endogenous stimulus	48	GO:0009719	response to endogenous stimulus	0	GO:0071495	1.93424	1.3e-14	2	0.0154734	-0.10849
-0.371159	0.13607	regulation of phosphate metabolic process	10	GO:0006793	phosphorus metabolic process	0	GO:0019220	1.86125	1.6e-14	1	-0.356723	0.174624
-0.37109	0.136019	regulation of phosphorus metabolic process	10	GO:0006793	phosphorus metabolic process	3	GO:0051174	1.86125	1.6e-14	1	-0.356723	0.174624
-0.368401	0.216532	mRNA processing	42	GO:0016071	mRNA metabolic process	352	GO:0006397	2.66667	1.8e-14	1	-0.356723	0.174624
-0.422024	0.168908	regulation of protein modification process	23	GO:0032268	regulation of cellular protein metabolic process	0	GO:0031399	2.10379	1.9e-14	1	-0.356723	0.174624
-0.0307856	-0.249431	regulation of intracellular signal transduction	35	GO:0035556	intracellular signal transduction	8	GO:1902531	2.0362	2e-14	2	0.0154734	-0.10849
0.0186582	-0.0514464	programmed cell death	47	GO:0008219	cell death	41	GO:0012501	2.27412	2.2e-14	2	0.0154734	-0.10849
0.0231416	-0.129881	regulation of organelle organization	26	GO:0051128	regulation of cellular component organization	4	GO:0033043	2.75	2.4e-14	2	0.0154734	-0.10849
-0.411842	0.144036	negative regulation of nucleobase-containing compound metabolic process	13	GO:0048523	negative regulation of cellular process	0	GO:0045934	2.16028	4.1e-14	1	-0.356723	0.174624
0.018738	-0.0514079	apoptotic process	47	GO:0008219	cell death	610	GO:0006915	2.18613	4.9e-14	2	0.0154734	-0.10849
-0.0415869	-0.219935	positive regulation of response to stimulus	34	GO:0048583	regulation of response to stimulus	0	GO:0048584	2.12917	5.1e-14	2	0.0154734	-0.10849
0.0816807	0.00298506	growth	49	GO:0040007	growth	1	GO:0040007	2.58342	5.3e-14	4	0.314749	0.225188
0.0633423	-0.218192	response to oxygen-containing compound	2	GO:0070887	cellular response to chemical stimulus	0	GO:1901700	1.84372	6.4e-14	2	0.0154734	-0.10849
0.0191066	-0.118518	regulation of cellular component biogenesis	26	GO:0051128	regulation of cellular component organization	0	GO:0044087	2.96084	1.4e-13	2	0.0154734	-0.10849
0.242012	0.190979	positive regulation of developmental process	1	GO:0050793	regulation of developmental process	0	GO:0051094	2.67431	1.5e-13	4	0.314749	0.225188
0.027227	-0.0685828	mitotic cell cycle process	24	GO:0022402	cell cycle process	1	GO:1903047	1.79257	1.6e-13	2	0.0154734	-0.10849
-0.443856	0.187506	regulation of protein phosphorylation	10	GO:0006793	phosphorus metabolic process	79	GO:0001932	1.77083	1.7e-13	1	-0.356723	0.174624
0.337837	0.25921	regulation of multicellular organismal development	1	GO:0050793	regulation of developmental process	0	GO:2000026	2.42954	1.8e-13	4	0.314749	0.225188
-0.357769	0.210469	RNA splicing	21	GO:0010468	regulation of gene expression	274	GO:0008380	2.54777	1.9e-13	1	-0.356723	0.174624
-0.0433564	-0.0933809	regulation of cell death	47	GO:0008219	cell death	12	GO:0010941	2.21607	2.2e-13	2	0.0154734	-0.10849
0.147951	0.0961585	positive regulation of multicellular organismal process	30	GO:0051239	regulation of multicellular organismal process	0	GO:0051240	2.6178	2.2e-13	4	0.314749	0.225188
0.0440315	-0.226156	cellular response to oxygen-containing compound	2	GO:0070887	cellular response to chemical stimulus	0	GO:1901701	2.17391	2.3e-13	2	0.0154734	-0.10849
-0.43534	0.163186	negative regulation of nucleic acid-templated transcription	13	GO:0048523	negative regulation of cellular process	5	GO:1903507	2.3176	2.4e-13	1	-0.356723	0.174624
-0.436009	0.163842	negative regulation of transcription, DNA-templated	13	GO:0048523	negative regulation of cellular process	751	GO:0045892	2.3176	2.4e-13	1	-0.356723	0.174624
-0.434078	0.162028	negative regulation of RNA biosynthetic process	13	GO:0048523	negative regulation of cellular process	1	GO:1902679	2.3176	2.4e-13	1	-0.356723	0.174624
0.387915	0.294184	embryo development ending in birth or egg hatching	43	GO:0009790	embryo development	18	GO:0009792	2.69608	2.9e-13	4	0.314749	0.225188
0.025808	-0.0359519	cell division	50	GO:0051301	cell division	387	GO:0051301	2.80811	2.9e-13	2	0.0154734	-0.10849
0.0798889	-0.349501	endocytosis	18	GO:0016192	vesicle-mediated transport	219	GO:0006897	3.16574	3.2e-13	3	0.060492	-0.328451
0.395512	0.312435	cell morphogenesis involved in differentiation	41	GO:0009653	anatomical structure morphogenesis	11	GO:0000904	2.91971	3.4e-13	4	0.314749	0.225188
-0.376427	0.221075	cellular macromolecule catabolic process	17	GO:1901575	organic substance catabolic process	3	GO:0044265	1.81237	4.8e-13	1	-0.356723	0.174624
-0.411206	0.142824	positive regulation of protein modification process	23	GO:0032268	regulation of cellular protein metabolic process	5	GO:0031401	2.02559	5.3e-13	1	-0.356723	0.174624
0.0290587	-0.0494328	microtubule-based process	51	GO:0007017	microtubule-based process	37	GO:0007017	2.75229	7.6e-13	2	0.0154734	-0.10849
-0.0369444	-0.0800466	regulation of cell population proliferation	52	GO:0042127	regulation of cell population proliferation	226	GO:0042127	2.2932	8.2e-13	2	0.0154734	-0.10849
-0.0324163	-0.107335	regulation of cell cycle	24	GO:0022402	cell cycle process	281	GO:0051726	1.85366	8.3e-13	2	0.0154734	-0.10849
0.0258337	-0.0349208	cell population proliferation	52	GO:0042127	regulation of cell population proliferation	194	GO:0008283	2.22222	8.8e-13	2	0.0154734	-0.10849
0.0161461	-0.409363	regulation of transport	15	GO:0051179	localization	3	GO:0051049	2.03252	9e-13	3	0.060492	-0.328451
-0.380684	0.225422	peptidyl-amino acid modification	6	GO:0036211	protein modification process	4	GO:0018193	2.59336	9.8e-13	1	-0.356723	0.174624
0.387497	0.293804	chordate embryonic development	43	GO:0009790	embryo development	9	GO:0043009	2.75689	1.1e-12	4	0.314749	0.225188
0.32722	0.235204	developmental growth	49	GO:0040007	growth	34	GO:0048589	2.97619	1.6e-12	4	0.314749	0.225188
-0.0248543	-0.221493	enzyme linked receptor protein signaling pathway	37	GO:0007166	cell surface receptor signaling pathway	7	GO:0007167	2.19072	2.2e-12	2	0.0154734	-0.10849
0.0628044	-0.212368	response to cytokine	2	GO:0070887	cellular response to chemical stimulus	64	GO:0034097	2.08333	2.5e-12	2	0.0154734	-0.10849
-0.428389	0.153633	positive regulation of transcription by RNA polymerase II	8	GO:0010604	positive regulation of macromolecule metabolic process	1950	GO:0045944	1.87747	2.9e-12	1	-0.356723	0.174624
-0.363898	0.112692	positive regulation of phosphorylation	10	GO:0006793	phosphorus metabolic process	45	GO:0042327	1.72911	3.7e-12	1	-0.356723	0.174624
0.323948	0.249626	regulation of anatomical structure morphogenesis	41	GO:0009653	anatomical structure morphogenesis	0	GO:0022603	2.49406	4.1e-12	4	0.314749	0.225188
0.00234101	-0.109761	regulation of locomotion	38	GO:0040011	locomotion	8	GO:0040012	2.8169	5.1e-12	3	0.060492	-0.328451
0.0844454	-0.0940291	microtubule cytoskeleton organization	51	GO:0007017	microtubule-based process	170	GO:0000226	2.77778	5.2e-12	2	0.0154734	-0.10849
0.0442257	-0.222428	cellular response to cytokine stimulus	2	GO:0070887	cellular response to chemical stimulus	42	GO:0071345	2.34114	5.5e-12	2	0.0154734	-0.10849
0.0636276	-0.376026	protein localization to organelle	36	GO:0008104	protein localization	32	GO:0033365	1.96507	5.7e-12	3	0.060492	-0.328451
-0.364563	0.112165	positive regulation of phosphorus metabolic process	10	GO:0006793	phosphorus metabolic process	0	GO:0010562	1.88679	5.9e-12	1	-0.356723	0.174624
-0.364651	0.112233	positive regulation of phosphate metabolic process	10	GO:0006793	phosphorus metabolic process	0	GO:0045937	1.88679	5.9e-12	1	-0.356723	0.174624
0.296703	0.231579	regulation of cell development	1	GO:0050793	regulation of developmental process	2	GO:0060284	2.44989	6.4e-12	4	0.314749	0.225188
0.00307992	-0.384649	regulation of cellular localization	15	GO:0051179	localization	8	GO:0060341	2.27027	6.4e-12	3	0.060492	-0.328451
-0.392885	0.250234	organonitrogen compound catabolic process	17	GO:1901575	organic substance catabolic process	2	GO:1901565	2.019	7.1e-12	1	-0.356723	0.174624
0.0376137	-0.113587	regulation of plasma membrane bounded cell projection organization	16	GO:0120036	plasma membrane bounded cell projection organization	3	GO:0120035	2.46154	8e-12	2	0.0154734	-0.10849
0.0371538	-0.113954	regulation of cell projection organization	16	GO:0120036	plasma membrane bounded cell projection organization	6	GO:0031344	2.3988	8.1e-12	2	0.0154734	-0.10849
-0.0256086	-0.08226	positive regulation of catalytic activity	27	GO:0065009	regulation of molecular function	40	GO:0043085	1.86722	1.1e-11	2	0.0154734	-0.10849
0.255265	0.165349	system process	53	GO:0003008	system process	0	GO:0003008	3.13199	1.2e-11	4	0.314749	0.225188
0.333682	0.243743	developmental process involved in reproduction	46	GO:0000003	reproduction	4	GO:0003006	1.70279	1.3e-11	4	0.314749	0.225188
-0.398742	0.254134	protein catabolic process	17	GO:1901575	organic substance catabolic process	56	GO:0030163	1.92061	1.6e-11	1	-0.356723	0.174624
-0.0418492	-0.0927735	regulation of apoptotic process	47	GO:0008219	cell death	214	GO:0042981	2.12604	1.7e-11	2	0.0154734	-0.10849
-0.0421539	-0.0929933	regulation of programmed cell death	47	GO:0008219	cell death	7	GO:0043067	2.10526	1.7e-11	2	0.0154734	-0.10849
-0.359509	0.121574	positive regulation of gene expression	8	GO:0010604	positive regulation of macromolecule metabolic process	655	GO:0010628	2.24719	2.3e-11	1	-0.356723	0.174624
0.406788	0.236082	cell part morphogenesis	41	GO:0009653	anatomical structure morphogenesis	1	GO:0032990	2.76423	2.4e-11	4	0.314749	0.225188
-0.0150273	-0.113503	negative regulation of cellular component organization	26	GO:0051128	regulation of cellular component organization	0	GO:0051129	2.18978	2.5e-11	2	0.0154734	-0.10849
0.0160429	-0.125967	cell-cell signaling	54	GO:0007267	cell-cell signaling	100	GO:0007267	1.65854	2.6e-11	2	0.0154734	-0.10849
0.063003	-0.21493	response to hormone	48	GO:0009719	response to endogenous stimulus	46	GO:0009725	2.50836	2.7e-11	2	0.0154734	-0.10849
-0.352032	0.206721	mRNA splicing, via spliceosome	21	GO:0010468	regulation of gene expression	206	GO:0000398	2.83843	2.7e-11	1	-0.356723	0.174624
-0.343578	0.202022	RNA splicing, via transesterification reactions	21	GO:0010468	regulation of gene expression	9	GO:0000375	2.83843	2.7e-11	1	-0.356723	0.174624
-0.343164	0.20178	RNA splicing, via transesterification reactions with bulged adenosine as nucleophile	21	GO:0010468	regulation of gene expression	0	GO:0000377	2.83843	2.7e-11	1	-0.356723	0.174624
-0.383821	0.226033	RNA processing	21	GO:0010468	regulation of gene expression	77	GO:0006396	2.30833	2.8e-11	1	-0.356723	0.174624
-0.404551	0.258017	organonitrogen compound biosynthetic process	14	GO:0009059	macromolecule biosynthetic process	0	GO:1901566	1.74717	3.9e-11	1	-0.356723	0.174624
0.00945975	-0.369472	regulation of cell motility	3	GO:0006928	movement of cell or subcellular component	13	GO:2000145	2.66667	4.1e-11	3	0.060492	-0.328451
0.0218616	-0.0403923	regulation of growth	49	GO:0040007	growth	81	GO:0040008	2.39316	5e-11	4	0.314749	0.225188
0.379581	0.290769	epithelium development	29	GO:0009888	tissue development	10	GO:0060429	2.68456	5e-11	4	0.314749	0.225188
0.00729249	-0.363553	regulation of cellular component movement	3	GO:0006928	movement of cell or subcellular component	2	GO:0051270	2.80488	5.3e-11	3	0.060492	-0.328451
-0.0730931	-0.151127	positive regulation of cell communication	31	GO:0007154	cell communication	0	GO:0010647	1.87553	5.6e-11	2	0.0154734	-0.10849
-0.343942	0.199913	cellular amide metabolic process	55	GO:0043603	cellular amide metabolic process	0	GO:0043603	1.93299	5.7e-11	1	-0.356723	0.174624
0.221682	0.197681	negative regulation of developmental process	1	GO:0050793	regulation of developmental process	0	GO:0051093	2.11161	6e-11	4	0.314749	0.225188
-0.0556518	-0.151601	positive regulation of signaling	32	GO:0007165	signal transduction	1	GO:0023056	1.84719	6.8e-11	2	0.0154734	-0.10849
-0.434475	0.162224	positive regulation of protein phosphorylation	10	GO:0006793	phosphorus metabolic process	280	GO:0001934	1.70279	7e-11	1	-0.356723	0.174624
0.413737	0.236991	plasma membrane bounded cell projection morphogenesis	41	GO:0009653	anatomical structure morphogenesis	1	GO:0120039	2.67559	7.8e-11	4	0.314749	0.225188
0.413843	0.237109	cell projection morphogenesis	41	GO:0009653	anatomical structure morphogenesis	5	GO:0048858	2.67559	7.8e-11	4	0.314749	0.225188
0.403846	0.309089	tube development	56	GO:0035295	tube development	2	GO:0035295	2.10305	8.1e-11	4	0.314749	0.225188
0.442428	0.35282	cell morphogenesis involved in neuron differentiation	41	GO:0009653	anatomical structure morphogenesis	16	GO:0048667	3.08285	8.6e-11	4	0.314749	0.225188
-0.394519	0.234477	cellular protein catabolic process	17	GO:1901575	organic substance catabolic process	16	GO:0044257	1.53846	8.8e-11	1	-0.356723	0.174624
0.428066	0.331546	circulatory system development	57	GO:0072359	circulatory system development	22	GO:0072359	2.91457	8.8e-11	4	0.314749	0.225188
-0.336309	0.135024	post-transcriptional regulation of gene expression	21	GO:0010468	regulation of gene expression	44	GO:0010608	1.43312	9.3e-11	1	-0.356723	0.174624
-0.340489	0.136467	regulation of catabolic process	17	GO:1901575	organic substance catabolic process	0	GO:0009894	1.98953	9.6e-11	1	-0.356723	0.174624
0.424261	0.325449	central nervous system development	9	GO:0030182	neuron differentiation	122	GO:0007417	2.51748	1.2e-10	4	0.314749	0.225188
0.409135	0.237811	cellular component morphogenesis	41	GO:0009653	anatomical structure morphogenesis	0	GO:0032989	3.15186	1.2e-10	4	0.314749	0.225188
0.0289247	-0.050415	actin filament-based process	58	GO:0030029	actin filament-based process	4	GO:0030029	3.14136	1.3e-10	2	0.0154734	-0.10849
0.353676	0.270245	regulation of nervous system development	30	GO:0051239	regulation of multicellular organismal process	3	GO:0051960	2.42588	1.7e-10	4	0.314749	0.225188
-0.422852	0.159427	negative regulation of transcription by RNA polymerase II	13	GO:0048523	negative regulation of cellular process	1349	GO:0000122	2.61067	1.9e-10	1	-0.356723	0.174624
-0.394927	0.234724	proteolysis involved in cellular protein catabolic process	17	GO:1901575	organic substance catabolic process	91	GO:0051603	1.62602	1.9e-10	1	-0.356723	0.174624
-0.00874649	-0.216192	regulation of response to stress	34	GO:0048583	regulation of response to stimulus	0	GO:0080134	2.35064	2e-10	2	0.0154734	-0.10849
0.021446	-0.0390497	cell adhesion	59	GO:0007155	cell adhesion	616	GO:0007155	2.88115	2.1e-10	2	0.0154734	-0.10849
-0.0231268	-0.223117	MAPK cascade	35	GO:0035556	intracellular signal transduction	102	GO:0000165	2.32198	2.3e-10	2	0.0154734	-0.10849
0.469653	0.286769	neuron projection morphogenesis	41	GO:0009653	anatomical structure morphogenesis	94	GO:0048812	2.8021	2.5e-10	4	0.314749	0.225188
0.371538	0.278961	in utero embryonic development	43	GO:0009790	embryo development	353	GO:0001701	3.38346	2.7e-10	4	0.314749	0.225188
0.0841703	-0.0935898	actin cytoskeleton organization	58	GO:0030029	actin filament-based process	222	GO:0030036	3.13199	3.7e-10	2	0.0154734	-0.10849
0.00984521	-0.368517	regulation of cell migration	3	GO:0006928	movement of cell or subcellular component	133	GO:0030334	2.47253	3.7e-10	3	0.060492	-0.328451
-0.0565101	-0.246897	positive regulation of signal transduction	31	GO:0007154	cell communication	14	GO:0009967	1.95713	3.8e-10	2	0.0154734	-0.10849
0.350589	0.187219	regulation of neuron projection development	16	GO:0120036	plasma membrane bounded cell projection organization	52	GO:0010975	1.66667	3.9e-10	2	0.0154734	-0.10849
0.437342	0.257936	axon development	16	GO:0120036	plasma membrane bounded cell projection organization	29	GO:0061564	2.60047	4e-10	2	0.0154734	-0.10849
0.0453989	-0.222349	cellular response to hormone stimulus	48	GO:0009719	response to endogenous stimulus	17	GO:0032870	2.7451	4.2e-10	2	0.0154734	-0.10849
0.461526	0.280606	axonogenesis	16	GO:0120036	plasma membrane bounded cell projection organization	133	GO:0007409	2.86458	4.5e-10	2	0.0154734	-0.10849
0.368118	0.281127	mesenchyme development	29	GO:0009888	tissue development	9	GO:0060485	4.23729	4.8e-10	4	0.314749	0.225188
-0.411307	0.24208	DNA metabolic process	60	GO:0006259	DNA metabolic process	15	GO:0006259	2.5	5.1e-10	1	-0.356723	0.174624
0.424824	0.326204	tube morphogenesis	56	GO:0035295	tube development	8	GO:0035239	1.94301	5.3e-10	4	0.314749	0.225188
0.270949	0.195182	regulation of developmental growth	49	GO:0040007	growth	2	GO:0048638	2.90323	5.3e-10	4	0.314749	0.225188
0.248297	0.203445	positive regulation of cell differentiation	1	GO:0050793	regulation of developmental process	56	GO:0045597	2.48175	6e-10	4	0.314749	0.225188
0.0607811	-0.341981	localization within membrane	5	GO:0070727	cellular macromolecule localization	4	GO:0051668	2.6643	6.5e-10	3	0.060492	-0.328451
0.081284	-0.08788	chromosome organization	25	GO:0007010	cytoskeleton organization	41	GO:0051276	2.22222	7.6e-10	2	0.0154734	-0.10849
-0.380479	0.242598	proteolysis	23	GO:0032268	regulation of cellular protein metabolic process	623	GO:0006508	1.79462	7.6e-10	1	-0.356723	0.174624
0.065188	-0.00290303	cell growth	49	GO:0040007	growth	1	GO:0016049	2.73684	9e-10	4	0.314749	0.225188
-0.0288865	-0.106675	regulation of cell cycle process	24	GO:0022402	cell cycle process	18	GO:0010564	2.03193	9.2e-10	2	0.0154734	-0.10849
-0.353913	0.130168	regulation of cellular catabolic process	17	GO:1901575	organic substance catabolic process	0	GO:0031329	1.60296	9.7e-10	1	-0.356723	0.174624
-0.0188494	-0.0773478	regulation of GTPase activity	27	GO:0065009	regulation of molecular function	98	GO:0043087	2.41546	1e-09	2	0.0154734	-0.10849
0.386593	0.294819	anatomical structure formation involved in morphogenesis	41	GO:0009653	anatomical structure morphogenesis	25	GO:0048646	2.4565	1.1e-09	4	0.314749	0.225188
-0.36683	0.215545	amide biosynthetic process	55	GO:0043603	cellular amide metabolic process	3	GO:0043604	1.86246	1.1e-09	1	-0.356723	0.174624
0.231716	0.212119	negative regulation of cell differentiation	1	GO:0050793	regulation of developmental process	52	GO:0045596	2.19124	1.1e-09	4	0.314749	0.225188
-0.388034	0.230693	modification-dependent protein catabolic process	17	GO:1901575	organic substance catabolic process	10	GO:0019941	1.5873	1.3e-09	1	-0.356723	0.174624
-0.356907	0.209715	modification-dependent macromolecule catabolic process	17	GO:1901575	organic substance catabolic process	0	GO:0043632	1.5873	1.3e-09	1	-0.356723	0.174624
-0.00963647	-0.0797113	chemical homeostasis	40	GO:0065008	regulation of biological quality	3	GO:0048878	2.26171	1.6e-09	2	0.0154734	-0.10849
-0.0245758	-0.0800852	regulation of transferase activity	27	GO:0065009	regulation of molecular function	0	GO:0051338	1.94444	1.6e-09	2	0.0154734	-0.10849
0.420472	0.305609	immune system development	45	GO:0002376	immune system process	5	GO:0002520	2.76243	1.7e-09	4	0.314749	0.225188
-0.371511	0.148068	regulation of mRNA metabolic process	42	GO:0016071	mRNA metabolic process	0	GO:1903311	2.5974	1.7e-09	1	-0.356723	0.174624
0.433398	0.33493	brain development	61	GO:0007420	brain development	221	GO:0007420	2.72727	1.7e-09	4	0.314749	0.225188
-0.387625	0.230436	ubiquitin-dependent protein catabolic process	17	GO:1901575	organic substance catabolic process	327	GO:0006511	1.59858	1.9e-09	1	-0.356723	0.174624
0.366775	0.286996	mesenchymal cell differentiation	29	GO:0009888	tissue development	12	GO:0048762	4.16667	1.9e-09	4	0.314749	0.225188
-0.0206615	-0.213169	transmembrane receptor protein tyrosine kinase signaling pathway	37	GO:0007166	cell surface receptor signaling pathway	138	GO:0007169	2.77264	2.1e-09	2	0.0154734	-0.10849
0.152727	0.0669836	multicellular organismal homeostasis	40	GO:0065008	regulation of biological quality	4	GO:0048871	4.40252	2.2e-09	2	0.0154734	-0.10849
0.384967	0.299139	glial cell differentiation	9	GO:0030182	neuron differentiation	25	GO:0010001	3.52941	2.5e-09	4	0.314749	0.225188
0.0833798	-0.0796584	cell junction organization	62	GO:0034330	cell junction organization	0	GO:0034330	2.27618	2.8e-09	2	0.0154734	-0.10849
0.433733	0.318916	hematopoietic or lymphoid organ development	45	GO:0002376	immune system process	2	GO:0048534	2.72206	2.9e-09	4	0.314749	0.225188
-0.382438	0.22475	cellular macromolecule biosynthetic process	14	GO:0009059	macromolecule biosynthetic process	3	GO:0034645	1.25945	3.1e-09	1	-0.356723	0.174624
0.347274	0.274171	regulation of neurogenesis	30	GO:0051239	regulation of multicellular organismal process	51	GO:0050767	2.40964	3.1e-09	4	0.314749	0.225188
0.0464981	-0.0487207	biological process involved in interspecies interaction between organisms	63	GO:0044419	biological process involved in interspecies interaction between organisms	24	GO:0044419	2.02247	3.1e-09	2	0.0154734	-0.10849
-0.349914	0.10873	regulation of kinase activity	27	GO:0065009	regulation of molecular function	6	GO:0043549	2.02361	3.3e-09	2	0.0154734	-0.10849
0.0821324	-0.0845162	supramolecular fiber organization	26	GO:0051128	regulation of cellular component organization	13	GO:0097435	3.02267	3.8e-09	2	0.0154734	-0.10849
0.0623175	-0.210043	response to nitrogen compound	2	GO:0070887	cellular response to chemical stimulus	0	GO:1901698	2.13777	4.2e-09	2	0.0154734	-0.10849
0.0537347	-0.188413	defense response	11	GO:0006950	response to stress	138	GO:0006952	1.61893	4.8e-09	2	0.0154734	-0.10849
0.0546871	-0.16894	response to abiotic stimulus	64	GO:0009628	response to abiotic stimulus	0	GO:0009628	2.42165	5.9e-09	2	0.0154734	-0.10849
-0.0244044	-0.0810789	regulation of hydrolase activity	27	GO:0065009	regulation of molecular function	1	GO:0051336	2.11706	6e-09	2	0.0154734	-0.10849
0.0810593	-0.079	membrane organization	62	GO:0034330	cell junction organization	29	GO:0061024	3.81818	6.2e-09	2	0.0154734	-0.10849
0.0623969	-0.208645	response to growth factor	2	GO:0070887	cellular response to chemical stimulus	8	GO:0070848	0.71048	6.2e-09	2	0.0154734	-0.10849
0.0330445	-0.196953	cellular response to DNA damage stimulus	11	GO:0006950	response to stress	554	GO:0006974	2.73973	6.2e-09	2	0.0154734	-0.10849
-0.00928922	-0.117064	negative regulation of organelle organization	26	GO:0051128	regulation of cellular component organization	0	GO:0010639	3.30789	6.8e-09	2	0.0154734	-0.10849
0.333785	0.247792	head development	61	GO:0007420	brain development	22	GO:0060322	2.43902	7.9e-09	4	0.314749	0.225188
0.0636061	-0.37146	protein localization to membrane	5	GO:0070727	cellular macromolecule localization	25	GO:0072657	2.78884	8.3e-09	3	0.060492	-0.328451
0.0668358	-0.403643	intracellular protein transport	36	GO:0008104	protein localization	281	GO:0006886	2.4	8.7e-09	3	0.060492	-0.328451
0.0445547	-0.220103	cellular response to growth factor stimulus	2	GO:0070887	cellular response to chemical stimulus	65	GO:0071363	0.744879	9.1e-09	2	0.0154734	-0.10849
-0.355713	0.143591	regulation of mRNA processing	42	GO:0016071	mRNA metabolic process	21	GO:0050684	2.73973	1.2e-08	1	-0.356723	0.174624
-0.373102	0.219637	peptide metabolic process	55	GO:0043603	cellular amide metabolic process	17	GO:0006518	1.66667	1.3e-08	1	-0.356723	0.174624
0.0800706	-0.0767932	endomembrane system organization	65	GO:0010256	endomembrane system organization	2	GO:0010256	3.30097	1.3e-08	2	0.0154734	-0.10849
-0.000497101	-0.378305	positive regulation of protein localization	36	GO:0008104	protein localization	8	GO:1903829	2.17391	1.5e-08	3	0.060492	-0.328451
0.131047	0.105549	negative regulation of multicellular organismal process	30	GO:0051239	regulation of multicellular organismal process	0	GO:0051241	2.0438	1.5e-08	4	0.314749	0.225188
0.0630532	-0.214437	response to organonitrogen compound	2	GO:0070887	cellular response to chemical stimulus	12	GO:0010243	1.82292	1.7e-08	2	0.0154734	-0.10849
-0.372162	0.147962	regulation of cellular macromolecule biosynthetic process	14	GO:0009059	macromolecule biosynthetic process	0	GO:2000112	1.20724	1.9e-08	1	-0.356723	0.174624
0.0280075	-0.129312	regulation of cytoskeleton organization	26	GO:0051128	regulation of cellular component organization	23	GO:0051493	3.0581	2e-08	2	0.0154734	-0.10849
-0.429279	0.256901	translation	55	GO:0043603	cellular amide metabolic process	290	GO:0006412	1.37615	2.1e-08	1	-0.356723	0.174624
0.39183	0.305892	gliogenesis	9	GO:0030182	neuron differentiation	11	GO:0042063	2.7668	2.2e-08	4	0.314749	0.225188
0.431678	0.317114	hemopoiesis	45	GO:0002376	immune system process	94	GO:0030097	2.63158	2.4e-08	4	0.314749	0.225188
-0.00165944	-0.212801	regulation of response to external stimulus	7	GO:0009605	response to external stimulus	0	GO:0032101	2.46212	2.6e-08	2	0.0154734	-0.10849
0.0814296	-0.0852613	nuclear division	25	GO:0007010	cytoskeleton organization	0	GO:0000280	2.29008	2.6e-08	2	0.0154734	-0.10849
-0.00705467	-0.382685	positive regulation of transport	15	GO:0051179	localization	1	GO:0051050	2.31924	2.6e-08	3	0.060492	-0.328451
-0.0178323	-0.212322	small GTPase mediated signal transduction	35	GO:0035556	intracellular signal transduction	107	GO:0007264	2.65849	3.1e-08	2	0.0154734	-0.10849
-0.399708	0.237567	peptide biosynthetic process	55	GO:0043603	cellular amide metabolic process	5	GO:0043043	1.36571	3.4e-08	1	-0.356723	0.174624
0.0815899	-0.0854971	organelle fission	25	GO:0007010	cytoskeleton organization	0	GO:0048285	2.10773	3.5e-08	2	0.0154734	-0.10849
0.387712	0.289819	reproductive structure development	28	GO:0048513	animal organ development	12	GO:0048608	1.63934	3.7e-08	4	0.314749	0.225188
0.377975	0.284007	reproductive system development	28	GO:0048513	animal organ development	6	GO:0061458	1.63934	3.7e-08	4	0.314749	0.225188
-0.417642	0.166488	negative regulation of protein metabolic process	23	GO:0032268	regulation of cellular protein metabolic process	4	GO:0051248	1.81612	3.9e-08	1	-0.356723	0.174624
0.0627393	-0.208292	response to peptide	2	GO:0070887	cellular response to chemical stimulus	3	GO:1901652	2.10773	4.1e-08	2	0.0154734	-0.10849
0.0633394	-0.212938	response to peptide hormone	2	GO:0070887	cellular response to chemical stimulus	50	GO:0043434	2.10526	4.4e-08	2	0.0154734	-0.10849
0.0609347	-0.191507	response to other organism	66	GO:0043207	response to external biotic stimulus	7	GO:0051707	2.1097	4.7e-08	2	0.0154734	-0.10849
0.059661	-0.18875	response to external biotic stimulus	66	GO:0043207	response to external biotic stimulus	2	GO:0043207	2.1097	4.7e-08	2	0.0154734	-0.10849
-0.353094	0.14329	regulation of mRNA splicing, via spliceosome	42	GO:0016071	mRNA metabolic process	24	GO:0048024	2.75229	5e-08	1	-0.356723	0.174624
0.420146	0.327391	animal organ morphogenesis	41	GO:0009653	anatomical structure morphogenesis	168	GO:0009887	2.27882	5.1e-08	4	0.314749	0.225188
-0.0213782	-0.079451	positive regulation of hydrolase activity	27	GO:0065009	regulation of molecular function	5	GO:0051345	1.82556	5.3e-08	2	0.0154734	-0.10849
0.441332	0.342724	blood vessel morphogenesis	57	GO:0072359	circulatory system development	43	GO:0048514	2.0284	5.9e-08	4	0.314749	0.225188
0.044202	-0.216762	cellular response to nitrogen compound	2	GO:0070887	cellular response to chemical stimulus	0	GO:1901699	2.27642	6.2e-08	2	0.0154734	-0.10849
0.352454	0.265607	developmental cell growth	49	GO:0040007	growth	3	GO:0048588	2.9661	6.3e-08	4	0.314749	0.225188
0.334393	0.248619	muscle structure development	67	GO:0061061	muscle structure development	11	GO:0061061	2.46212	6.4e-08	4	0.314749	0.225188
0.0836935	-0.0914924	organelle assembly	26	GO:0051128	regulation of cellular component organization	6	GO:0070925	2.29226	6.5e-08	2	0.0154734	-0.10849
0.0564455	-0.0893724	regulation of cell growth	49	GO:0040007	growth	60	GO:0001558	2.03562	6.9e-08	4	0.314749	0.225188
0.0467691	-0.220504	cellular response to peptide	2	GO:0070887	cellular response to chemical stimulus	5	GO:1901653	2.45902	7e-08	2	0.0154734	-0.10849
-0.422484	0.158959	regulation of protein kinase activity	27	GO:0065009	regulation of molecular function	24	GO:0045859	2.15686	7.6e-08	2	0.0154734	-0.10849
-0.352961	0.141706	regulation of RNA splicing	21	GO:0010468	regulation of gene expression	68	GO:0043484	2.0202	8.1e-08	1	-0.356723	0.174624
0.079398	-0.108768	mitotic nuclear division	25	GO:0007010	cytoskeleton organization	2	GO:0140014	2.51572	8.4e-08	2	0.0154734	-0.10849
0.429912	0.334213	heart development	57	GO:0072359	circulatory system development	311	GO:0007507	3.17726	8.6e-08	4	0.314749	0.225188
0.04566	-0.224281	cellular response to organonitrogen compound	2	GO:0070887	cellular response to chemical stimulus	1	GO:0071417	1.94004	9.1e-08	2	0.0154734	-0.10849
-0.0603266	-0.223849	negative regulation of intracellular signal transduction	31	GO:0007154	cell communication	2	GO:1902532	3.27511	9.4e-08	2	0.0154734	-0.10849
0.055739	-0.181153	response to biotic stimulus	66	GO:0043207	response to external biotic stimulus	0	GO:0009607	2.18281	9.5e-08	2	0.0154734	-0.10849
0.418811	0.321369	forebrain development	61	GO:0007420	brain development	95	GO:0030900	3.50318	1.1e-07	4	0.314749	0.225188
0.0623071	-0.208901	response to organic cyclic compound	2	GO:0070887	cellular response to chemical stimulus	42	GO:0014070	2	1.1e-07	2	0.0154734	-0.10849
0.356599	0.276934	epithelial to mesenchymal transition	29	GO:0009888	tissue development	48	GO:0001837	3.47222	1.1e-07	4	0.314749	0.225188
-0.0222828	-0.0790949	positive regulation of transferase activity	27	GO:0065009	regulation of molecular function	4	GO:0051347	1.84049	1.2e-07	2	0.0154734	-0.10849
0.0469484	-0.220677	cellular response to peptide hormone stimulus	2	GO:0070887	cellular response to chemical stimulus	13	GO:0071375	2.47678	1.2e-07	2	0.0154734	-0.10849
-0.0212462	-0.216794	regulation of cellular response to stress	34	GO:0048583	regulation of response to stimulus	6	GO:0080135	2.27618	1.3e-07	2	0.0154734	-0.10849
-0.0215008	-0.219773	cell surface receptor signaling pathway involved in cell-cell signaling	54	GO:0007267	cell-cell signaling	2	GO:1905114	1.71306	1.4e-07	2	0.0154734	-0.10849
-0.333574	0.113115	positive regulation of catabolic process	17	GO:1901575	organic substance catabolic process	0	GO:0009896	2.21811	1.5e-07	1	-0.356723	0.174624
-0.0245342	-0.238264	regulation of MAPK cascade	35	GO:0035556	intracellular signal transduction	48	GO:0043408	2.29277	1.5e-07	2	0.0154734	-0.10849
-0.380366	0.22615	proteasomal protein catabolic process	17	GO:1901575	organic substance catabolic process	38	GO:0010498	1.19332	1.7e-07	1	-0.356723	0.174624
0.000208369	-0.0489884	positive regulation of growth	49	GO:0040007	growth	10	GO:0045927	2.72374	1.8e-07	4	0.314749	0.225188
-0.0349292	-0.0806866	regulation of cell adhesion	59	GO:0007155	cell adhesion	55	GO:0030155	3.13725	2.1e-07	2	0.0154734	-0.10849
0.420466	0.322221	embryonic morphogenesis	43	GO:0009790	embryo development	25	GO:0048598	2.29446	2.1e-07	4	0.314749	0.225188
-0.0031839	-0.0761096	regulation of anatomical structure size	40	GO:0065008	regulation of biological quality	0	GO:0090066	2.06612	2.3e-07	2	0.0154734	-0.10849
-0.41481	0.149412	negative regulation of cellular protein metabolic process	23	GO:0032268	regulation of cellular protein metabolic process	6	GO:0032269	1.78998	2.4e-07	1	-0.356723	0.174624
-0.0786659	-0.0857371	negative regulation of cell death	47	GO:0008219	cell death	119	GO:0060548	2.04521	2.4e-07	2	0.0154734	-0.10849
0.0277031	-0.0679436	cell cycle phase transition	24	GO:0022402	cell cycle process	6	GO:0044770	0.790514	2.4e-07	2	0.0154734	-0.10849
0.0281737	-0.0683545	mitotic cell cycle phase transition	24	GO:0022402	cell cycle process	22	GO:0044772	0.70922	2.5e-07	2	0.0154734	-0.10849
0.0136966	-0.118833	positive regulation of cell projection organization	16	GO:0120036	plasma membrane bounded cell projection organization	8	GO:0031346	2.43902	2.5e-07	2	0.0154734	-0.10849
-0.368696	0.222421	nucleobase-containing small molecule metabolic process	68	GO:0055086	nucleobase-containing small molecule metabolic process	0	GO:0055086	2.73973	2.6e-07	1	-0.356723	0.174624
0.398779	0.306463	tissue morphogenesis	29	GO:0009888	tissue development	11	GO:0048729	1.95382	2.6e-07	4	0.314749	0.225188
0.401165	0.307663	embryonic organ development	43	GO:0009790	embryo development	50	GO:0048568	2.43902	2.8e-07	4	0.314749	0.225188
0.0276958	-0.0348857	establishment or maintenance of cell polarity	69	GO:0007163	establishment or maintenance of cell polarity	49	GO:0007163	3.38346	3e-07	2	0.0154734	-0.10849
0.001224	-0.132829	positive regulation of organelle organization	26	GO:0051128	regulation of cellular component organization	4	GO:0010638	2.24359	3.2e-07	2	0.0154734	-0.10849
-0.0176453	-0.0769654	positive regulation of GTPase activity	27	GO:0065009	regulation of molecular function	215	GO:0043547	1.93548	3.2e-07	2	0.0154734	-0.10849
0.4069	0.31197	blood vessel development	57	GO:0072359	circulatory system development	80	GO:0001568	2.12766	3.3e-07	4	0.314749	0.225188
0.0984938	-0.143239	immune response	45	GO:0002376	immune system process	421	GO:0006955	2.33161	3.4e-07	4	0.314749	0.225188
0.0623956	-0.353551	nucleocytoplasmic transport	5	GO:0070727	cellular macromolecule localization	38	GO:0006913	2.31579	3.5e-07	3	0.060492	-0.328451
0.0624126	-0.353725	nuclear transport	5	GO:0070727	cellular macromolecule localization	4	GO:0051169	2.31579	3.5e-07	3	0.060492	-0.328451
-0.373931	0.222258	proteasome-mediated ubiquitin-dependent protein catabolic process	17	GO:1901575	organic substance catabolic process	232	GO:0043161	1.34771	3.6e-07	1	-0.356723	0.174624
-0.301192	0.197396	small molecule metabolic process	68	GO:0055086	nucleobase-containing small molecule metabolic process	1	GO:0044281	2.1097	3.6e-07	1	-0.356723	0.174624
-0.0580697	-0.087829	positive regulation of cell population proliferation	52	GO:0042127	regulation of cell population proliferation	711	GO:0008284	2.36111	3.8e-07	2	0.0154734	-0.10849
-0.0677461	-0.0724137	negative regulation of cell population proliferation	52	GO:0042127	regulation of cell population proliferation	508	GO:0008285	2.41449	3.8e-07	2	0.0154734	-0.10849
-0.360672	0.213164	histone modification	6	GO:0036211	protein modification process	17	GO:0016570	2.9703	4.2e-07	1	-0.356723	0.174624
-0.434632	0.189334	regulation of translation	55	GO:0043603	cellular amide metabolic process	144	GO:0006417	1.3363	4.4e-07	1	-0.356723	0.174624
0.0575554	-0.164573	response to nutrient levels	7	GO:0009605	response to external stimulus	42	GO:0031667	2.0202	4.5e-07	2	0.0154734	-0.10849
-0.323073	0.190734	organophosphate metabolic process	10	GO:0006793	phosphorus metabolic process	1	GO:0019637	2.75229	4.7e-07	1	-0.356723	0.174624
0.0601602	-0.339732	export from cell	15	GO:0051179	localization	0	GO:0140352	1.34875	4.8e-07	3	0.060492	-0.328451
0.409553	0.314434	vasculature development	57	GO:0072359	circulatory system development	32	GO:0001944	2.30769	4.9e-07	4	0.314749	0.225188
0.0633338	-0.358284	protein localization to plasma membrane	36	GO:0008104	protein localization	211	GO:0072659	2.46479	4.9e-07	3	0.060492	-0.328451
0.0190997	-0.0511373	regulation of immune system process	45	GO:0002376	immune system process	20	GO:0002682	2.59067	5e-07	4	0.314749	0.225188
0.0631652	-0.360385	protein localization to cell periphery	36	GO:0008104	protein localization	2	GO:1990778	2.29226	5e-07	3	0.060492	-0.328451
0.0444276	-0.100446	regulation of cell size	40	GO:0065008	regulation of biological quality	25	GO:0008361	1.59574	5.4e-07	2	0.0154734	-0.10849
-0.348418	0.130976	regulation of cellular amide metabolic process	55	GO:0043603	cellular amide metabolic process	0	GO:0034248	1.41988	5.4e-07	1	-0.356723	0.174624
-0.00429439	-0.122563	positive regulation of cellular component biogenesis	26	GO:0051128	regulation of cellular component organization	1	GO:0044089	3.22581	5.9e-07	2	0.0154734	-0.10849
0.0836625	-0.0940815	actin filament organization	26	GO:0051128	regulation of cellular component organization	167	GO:0007015	2.68817	5.9e-07	2	0.0154734	-0.10849
0.363762	0.267498	developmental growth involved in morphogenesis	49	GO:0040007	growth	3	GO:0060560	2.5974	6e-07	4	0.314749	0.225188
-0.0475766	-0.109925	positive regulation of cell cycle	24	GO:0022402	cell cycle process	47	GO:0045787	2.4	6.2e-07	2	0.0154734	-0.10849
0.259051	0.207983	positive regulation of cell development	1	GO:0050793	regulation of developmental process	2	GO:0010720	2.73973	6.2e-07	4	0.314749	0.225188
-0.369625	0.221025	peptidyl-serine phosphorylation	6	GO:0036211	protein modification process	241	GO:0018105	2.38095	6.3e-07	1	-0.356723	0.174624
-0.33345	0.1975	peptidyl-serine modification	6	GO:0036211	protein modification process	0	GO:0018209	2.38095	6.3e-07	1	-0.356723	0.174624
0.0795877	-0.0788129	cellular component disassembly	44	GO:0065003	protein-containing complex assembly	0	GO:0022411	2.34375	7.2e-07	2	0.0154734	-0.10849
0.0975399	-0.0754319	plasma membrane bounded cell projection assembly	16	GO:0120036	plasma membrane bounded cell projection organization	0	GO:0120031	2.99252	7.4e-07	2	0.0154734	-0.10849
-0.0205787	-0.114273	positive regulation of locomotion	38	GO:0040011	locomotion	2	GO:0040017	2.39044	7.5e-07	3	0.060492	-0.328451
-0.351191	0.208065	peptidyl-lysine modification	6	GO:0036211	protein modification process	1	GO:0018205	2.89474	7.6e-07	1	-0.356723	0.174624
-0.345074	0.088328	positive regulation of kinase activity	27	GO:0065009	regulation of molecular function	70	GO:0033674	1.80412	7.8e-07	2	0.0154734	-0.10849
0.369729	0.290064	epithelial cell differentiation	29	GO:0009888	tissue development	76	GO:0030855	4.18502	7.8e-07	4	0.314749	0.225188
0.0623108	-0.209054	response to lipid	2	GO:0070887	cellular response to chemical stimulus	13	GO:0033993	2.15686	7.8e-07	2	0.0154734	-0.10849
-0.0205984	-0.218067	Wnt signaling pathway	54	GO:0007267	cell-cell signaling	233	GO:0016055	1.67064	7.9e-07	2	0.0154734	-0.10849
0.233802	0.17201	positive regulation of developmental growth	49	GO:0040007	growth	8	GO:0048639	3.52941	8.2e-07	4	0.314749	0.225188
0.0576237	-0.165245	response to extracellular stimulus	7	GO:0009605	response to external stimulus	3	GO:0009991	2.20126	9.7e-07	2	0.0154734	-0.10849
-0.0136281	-0.348429	positive regulation of cell motility	3	GO:0006928	movement of cell or subcellular component	25	GO:2000147	2.24949	1e-06	3	0.060492	-0.328451
0.0276717	-0.120763	regulation of supramolecular fiber organization	26	GO:0051128	regulation of cellular component organization	0	GO:1902903	2.96443	1e-06	2	0.0154734	-0.10849
-0.0578924	-0.097603	positive regulation of apoptotic process	47	GO:0008219	cell death	446	GO:0043065	1.98556	1e-06	2	0.0154734	-0.10849
0.06298	-0.355771	protein localization to nucleus	36	GO:0008104	protein localization	50	GO:0034504	1.4862	1.1e-06	3	0.060492	-0.328451
0.395247	0.303143	morphogenesis of an epithelium	29	GO:0009888	tissue development	34	GO:0002009	2.0284	1.3e-06	4	0.314749	0.225188
0.0971761	-0.0757546	cell projection assembly	16	GO:0120036	plasma membrane bounded cell projection organization	30	GO:0030031	2.89855	1.4e-06	2	0.0154734	-0.10849
-0.0116581	-0.0735338	cellular homeostasis	40	GO:0065008	regulation of biological quality	15	GO:0019725	2.15686	1.4e-06	2	0.0154734	-0.10849
0.0828898	-0.383562	ion transport	15	GO:0051179	localization	598	GO:0006811	1.7762	1.5e-06	3	0.060492	-0.328451
0.0191815	-0.119365	cell-cell signaling by wnt	54	GO:0007267	cell-cell signaling	2	GO:0198738	1.65485	1.5e-06	2	0.0154734	-0.10849
0.217512	0.132172	ossification	70	GO:0001503	ossification	112	GO:0001503	3.58423	1.5e-06	4	0.314749	0.225188
-0.393527	0.23711	nucleotide metabolic process	68	GO:0055086	nucleobase-containing small molecule metabolic process	26	GO:0009117	3.16206	1.5e-06	1	-0.356723	0.174624
-0.395059	0.237968	nucleoside phosphate metabolic process	68	GO:0055086	nucleobase-containing small molecule metabolic process	2	GO:0006753	3.16206	1.5e-06	1	-0.356723	0.174624
-0.0156667	-0.341969	positive regulation of cellular component movement	3	GO:0006928	movement of cell or subcellular component	13	GO:0051272	2.3301	1.5e-06	3	0.060492	-0.328451
-0.0164417	-0.209279	Ras protein signal transduction	35	GO:0035556	intracellular signal transduction	94	GO:0007265	2.36842	1.7e-06	2	0.0154734	-0.10849
0.45026	0.271611	neuron projection extension	49	GO:0040007	growth	38	GO:1990138	2.40964	1.7e-06	4	0.314749	0.225188
0.374463	0.280833	visual system development	28	GO:0048513	animal organ development	1	GO:0150063	3.7037	1.8e-06	4	0.314749	0.225188
0.394256	0.300277	eye development	28	GO:0048513	animal organ development	54	GO:0001654	3.7037	1.8e-06	4	0.314749	0.225188
0.374592	0.280953	sensory system development	28	GO:0048513	animal organ development	2	GO:0048880	3.7037	1.8e-06	4	0.314749	0.225188
-0.0769982	-0.0853756	negative regulation of apoptotic process	47	GO:0008219	cell death	703	GO:0043066	2.05066	1.8e-06	2	0.0154734	-0.10849
0.0470939	-0.218209	cellular response to insulin stimulus	2	GO:0070887	cellular response to chemical stimulus	117	GO:0032869	2.96296	1.9e-06	2	0.0154734	-0.10849
0.0629702	-0.209488	response to insulin	2	GO:0070887	cellular response to chemical stimulus	64	GO:0032868	2.65781	1.9e-06	2	0.0154734	-0.10849
-0.0451174	-0.110166	positive regulation of cell cycle process	24	GO:0022402	cell cycle process	2	GO:0090068	2.50896	1.9e-06	2	0.0154734	-0.10849
0.338276	0.260643	muscle cell differentiation	67	GO:0061061	muscle structure development	24	GO:0042692	2.86533	2e-06	4	0.314749	0.225188
-0.0582597	-0.0976741	positive regulation of programmed cell death	47	GO:0008219	cell death	11	GO:0043068	1.95382	2e-06	2	0.0154734	-0.10849
0.044748	-0.216858	cellular response to lipid	2	GO:0070887	cellular response to chemical stimulus	6	GO:0071396	2.51889	2e-06	2	0.0154734	-0.10849
-0.266506	0.171113	carbohydrate derivative metabolic process	71	GO:1901135	carbohydrate derivative metabolic process	3	GO:1901135	2.34375	2e-06	1	-0.356723	0.174624
0.0604086	-0.334389	organelle localization	5	GO:0070727	cellular macromolecule localization	3	GO:0051640	2.54545	2.1e-06	3	0.060492	-0.328451
0.241793	0.151458	multicellular organismal reproductive process	46	GO:0000003	reproduction	3	GO:0048609	1.58103	2.1e-06	4	0.314749	0.225188
0.242137	0.151764	multicellular organism reproduction	46	GO:0000003	reproduction	0	GO:0032504	1.58103	2.1e-06	4	0.314749	0.225188
-0.358645	0.226707	organic cyclic compound catabolic process	17	GO:1901575	organic substance catabolic process	0	GO:1901361	2.40964	2.1e-06	1	-0.356723	0.174624
-0.0773103	-0.0853947	negative regulation of programmed cell death	47	GO:0008219	cell death	20	GO:0043069	2.019	2.2e-06	2	0.0154734	-0.10849
-0.0594371	-0.0980914	positive regulation of cell death	47	GO:0008219	cell death	60	GO:0010942	1.86757	2.2e-06	2	0.0154734	-0.10849
-0.0240435	-0.0812584	negative regulation of molecular function	27	GO:0065009	regulation of molecular function	2	GO:0044092	2.30665	2.3e-06	2	0.0154734	-0.10849
0.0432689	-0.103578	regulation of cellular component size	40	GO:0065008	regulation of biological quality	2	GO:0032535	1.89125	2.3e-06	2	0.0154734	-0.10849
-0.0256322	-0.10408	regulation of mitotic cell cycle	24	GO:0022402	cell cycle process	55	GO:0007346	1.22699	2.3e-06	2	0.0154734	-0.10849
-0.0131502	-0.347912	positive regulation of cell migration	3	GO:0006928	movement of cell or subcellular component	283	GO:0030335	2.29167	2.3e-06	3	0.060492	-0.328451
0.0287646	-0.123246	regulation of protein-containing complex assembly	26	GO:0051128	regulation of cellular component organization	24	GO:0043254	2.71845	2.6e-06	2	0.0154734	-0.10849
0.377257	0.214312	regulation of axonogenesis	16	GO:0120036	plasma membrane bounded cell projection organization	31	GO:0050770	3.01205	2.7e-06	2	0.0154734	-0.10849
-0.376674	0.223585	nucleobase-containing compound catabolic process	17	GO:1901575	organic substance catabolic process	0	GO:0034655	2.54777	2.9e-06	1	-0.356723	0.174624
0.388041	0.28957	heart growth	49	GO:0040007	growth	2	GO:0060419	4.91803	3e-06	4	0.314749	0.225188
-0.370932	0.2194	protein modification by small protein conjugation or removal	6	GO:0036211	protein modification process	0	GO:0070647	1.9943	3e-06	1	-0.356723	0.174624
0.379029	0.282803	placenta development	28	GO:0048513	animal organ development	54	GO:0001890	1.04167	3.1e-06	4	0.314749	0.225188
0.0598518	-0.20123	defense response to other organism	66	GO:0043207	response to external biotic stimulus	1	GO:0098542	2.31214	3.2e-06	2	0.0154734	-0.10849
0.241259	0.213275	negative regulation of cell development	1	GO:0050793	regulation of developmental process	2	GO:0010721	2.54237	3.2e-06	4	0.314749	0.225188
0.026102	-0.406145	regulation of establishment of protein localization	36	GO:0008104	protein localization	12	GO:0070201	1.97628	3.3e-06	3	0.060492	-0.328451
0.0671849	-0.00760926	sexual reproduction	46	GO:0000003	reproduction	12	GO:0019953	1.27389	3.7e-06	4	0.314749	0.225188
0.0648392	-0.378792	establishment of protein localization to organelle	36	GO:0008104	protein localization	10	GO:0072594	1.93237	3.8e-06	3	0.060492	-0.328451
-0.0225341	-0.209952	positive regulation of response to external stimulus	7	GO:0009605	response to external stimulus	0	GO:0032103	2.15054	3.8e-06	2	0.0154734	-0.10849
0.41329	0.312363	leukocyte differentiation	45	GO:0002376	immune system process	6	GO:0002521	2.86458	3.8e-06	4	0.314749	0.225188
0.320196	0.224208	organ growth	49	GO:0040007	growth	17	GO:0035265	3.125	3.9e-06	4	0.314749	0.225188
0.306499	0.229171	stem cell differentiation	22	GO:0048468	cell development	46	GO:0048863	2.94118	4e-06	4	0.314749	0.225188
0.350653	0.263769	muscle tissue development	29	GO:0009888	tissue development	5	GO:0060537	2.66667	4.4e-06	4	0.314749	0.225188
-0.36124	0.212717	cellular nitrogen compound catabolic process	17	GO:1901575	organic substance catabolic process	0	GO:0044270	2.51572	4.8e-06	1	-0.356723	0.174624
-0.3514	0.206253	heterocycle catabolic process	17	GO:1901575	organic substance catabolic process	0	GO:0046700	2.51572	4.8e-06	1	-0.356723	0.174624
0.290263	0.254447	negative regulation of neurogenesis	30	GO:0051239	regulation of multicellular organismal process	38	GO:0050768	3	4.8e-06	4	0.314749	0.225188
0.290453	0.246446	negative regulation of nervous system development	30	GO:0051239	regulation of multicellular organismal process	0	GO:0051961	3	4.8e-06	4	0.314749	0.225188
-0.299118	0.177473	ribose phosphate metabolic process	71	GO:1901135	carbohydrate derivative metabolic process	5	GO:0019693	3.0303	4.9e-06	1	-0.356723	0.174624
-0.0524495	-0.247704	positive regulation of intracellular signal transduction	35	GO:0035556	intracellular signal transduction	12	GO:1902533	2.01072	4.9e-06	2	0.0154734	-0.10849
-0.385794	0.233174	ribonucleotide metabolic process	71	GO:1901135	carbohydrate derivative metabolic process	3	GO:0009259	2.7027	5e-06	1	-0.356723	0.174624
0.0227269	-0.0388753	cell-cell adhesion	59	GO:0007155	cell adhesion	235	GO:0098609	2.92135	5.2e-06	2	0.0154734	-0.10849
0.340656	0.254344	striated muscle tissue development	29	GO:0009888	tissue development	5	GO:0014706	3.75	5.3e-06	4	0.314749	0.225188
0.420672	0.325699	cardiac muscle tissue development	29	GO:0009888	tissue development	31	GO:0048738	3.8961	5.4e-06	4	0.314749	0.225188
0.44371	0.266706	axon extension	49	GO:0040007	growth	43	GO:0048675	0.819672	5.5e-06	4	0.314749	0.225188
-0.346935	0.107304	positive regulation of cellular catabolic process	17	GO:1901575	organic substance catabolic process	0	GO:0031331	1.8595	5.6e-06	1	-0.356723	0.174624
0.077444	-0.329289	Golgi vesicle transport	18	GO:0016192	vesicle-mediated transport	21	GO:0048193	4.07407	5.6e-06	3	0.060492	-0.328451
0.0302134	-0.0653852	cytoskeleton-dependent cytokinesis	50	GO:0051301	cell division	17	GO:0061640	6.42202	5.8e-06	2	0.0154734	-0.10849
0.0834023	-0.0832333	cell junction assembly	62	GO:0034330	cell junction organization	8	GO:0034329	2.20994	5.9e-06	2	0.0154734	-0.10849
0.0447709	-0.215949	cellular response to organic cyclic compound	2	GO:0070887	cellular response to chemical stimulus	60	GO:0071407	1.79775	6.1e-06	2	0.0154734	-0.10849
0.305107	0.237156	regulation of epithelial to mesenchymal transition	29	GO:0009888	tissue development	13	GO:0010717	4.16667	6.2e-06	4	0.314749	0.225188
0.0632407	-0.351009	endosomal transport	5	GO:0070727	cellular macromolecule localization	75	GO:0016197	2.04918	6.3e-06	3	0.060492	-0.328451
0.0621083	-0.346828	establishment of organelle localization	5	GO:0070727	cellular macromolecule localization	4	GO:0051656	2.72109	6.5e-06	3	0.060492	-0.328451
-0.365039	0.067861	DNA repair	11	GO:0006950	response to stress	400	GO:0006281	2.83976	6.5e-06	2	0.0154734	-0.10849
0.316022	0.235727	stem cell development	22	GO:0048468	cell development	7	GO:0048864	5.76923	6.6e-06	4	0.314749	0.225188
-0.341968	0.204424	peptidyl-threonine phosphorylation	6	GO:0036211	protein modification process	87	GO:0018107	3.14961	6.6e-06	1	-0.356723	0.174624
-0.306226	0.181268	peptidyl-threonine modification	6	GO:0036211	protein modification process	0	GO:0018210	3.14961	6.6e-06	1	-0.356723	0.174624
0.246875	0.157625	nervous system process	53	GO:0003008	system process	62	GO:0050877	2.41449	7.6e-06	4	0.314749	0.225188
-0.405248	0.241739	RNA catabolic process	17	GO:1901575	organic substance catabolic process	35	GO:0006401	2.39726	7.8e-06	1	-0.356723	0.174624
-0.351454	0.206279	aromatic compound catabolic process	17	GO:1901575	organic substance catabolic process	8	GO:0019439	2.47678	7.8e-06	1	-0.356723	0.174624
0.0283259	-0.0348071	establishment of cell polarity	69	GO:0007163	establishment or maintenance of cell polarity	47	GO:0030010	2.98507	7.8e-06	2	0.0154734	-0.10849
0.0272791	-0.0394781	chromosome segregation	72	GO:0007059	chromosome segregation	111	GO:0007059	2.35294	7.9e-06	2	0.0154734	-0.10849
0.410459	0.310528	cardiac muscle tissue growth	49	GO:0040007	growth	2	GO:0055017	5.08475	8.1e-06	4	0.314749	0.225188
0.311348	0.234008	regulation of cell morphogenesis	41	GO:0009653	anatomical structure morphogenesis	30	GO:0022604	2.10526	8.2e-06	4	0.314749	0.225188
0.0414451	-0.0322976	viral process	73	GO:0016032	viral process	31	GO:0016032	2.68293	8.5e-06	2	0.0154734	-0.10849
-0.404575	0.185939	regulation of protein catabolic process	17	GO:1901575	organic substance catabolic process	21	GO:0042176	2.15633	8.7e-06	1	-0.356723	0.174624
-0.000873175	-0.0739042	carbohydrate homeostasis	40	GO:0065008	regulation of biological quality	2	GO:0033500	1.53061	9e-06	2	0.0154734	-0.10849
-0.00085373	-0.0738936	glucose homeostasis	40	GO:0065008	regulation of biological quality	176	GO:0042593	1.53061	9e-06	2	0.0154734	-0.10849
0.382564	0.296076	central nervous system neuron differentiation	9	GO:0030182	neuron differentiation	13	GO:0021953	2.29008	9.2e-06	4	0.314749	0.225188
0.18016	0.106928	regulation of system process	53	GO:0003008	system process	0	GO:0044057	3.01205	9.3e-06	4	0.314749	0.225188
0.0274847	-0.419029	regulation of protein transport	36	GO:0008104	protein localization	15	GO:0051223	1.91083	9.3e-06	3	0.060492	-0.328451
-0.362229	0.21555	purine-containing compound metabolic process	55	GO:0043603	cellular amide metabolic process	0	GO:0072521	2.9661	9.4e-06	1	-0.356723	0.174624
0.0294988	-0.0663218	cytokinesis	50	GO:0051301	cell division	5	GO:0000910	4.6875	9.5e-06	2	0.0154734	-0.10849
-0.412623	0.136232	positive regulation of protein kinase activity	27	GO:0065009	regulation of molecular function	80	GO:0045860	1.80723	9.5e-06	2	0.0154734	-0.10849
0.0661772	-0.381267	protein import into nucleus	5	GO:0070727	cellular macromolecule localization	138	GO:0006606	1.66667	1e-05	3	0.060492	-0.328451
0.0618992	-0.339753	import into nucleus	5	GO:0070727	cellular macromolecule localization	6	GO:0051170	1.66667	1e-05	3	0.060492	-0.328451
0.275669	0.19207	regulation of organ growth	49	GO:0040007	growth	10	GO:0046620	3.53982	1.1e-05	4	0.314749	0.225188
-0.306469	0.183448	organic acid metabolic process	68	GO:0055086	nucleobase-containing small molecule metabolic process	51	GO:0006082	2.60417	1.1e-05	1	-0.356723	0.174624
-0.06235	-0.0977175	negative regulation of cell cycle	24	GO:0022402	cell cycle process	56	GO:0045786	1.43266	1.1e-05	2	0.0154734	-0.10849
-0.368063	0.133154	negative regulation of cellular macromolecule biosynthetic process	14	GO:0009059	macromolecule biosynthetic process	0	GO:2000113	1.27119	1.1e-05	1	-0.356723	0.174624
0.0579944	-0.180037	defense response to symbiont	66	GO:0043207	response to external biotic stimulus	0	GO:0140546	4.08163	1.1e-05	2	0.0154734	-0.10849
0.0580358	-0.180208	defense response to virus	66	GO:0043207	response to external biotic stimulus	253	GO:0051607	4.08163	1.1e-05	2	0.0154734	-0.10849
0.0772451	-0.327405	receptor-mediated endocytosis	18	GO:0016192	vesicle-mediated transport	88	GO:0006898	3.11284	1.3e-05	3	0.060492	-0.328451
-0.318743	0.188172	protein deacylation	6	GO:0036211	protein modification process	0	GO:0035601	3.48259	1.4e-05	1	-0.356723	0.174624
-0.314469	0.185584	protein deacetylation	6	GO:0036211	protein modification process	24	GO:0006476	3.48259	1.4e-05	1	-0.356723	0.174624
-0.270757	0.171242	macromolecule deacylation	6	GO:0036211	protein modification process	0	GO:0098732	3.48259	1.4e-05	1	-0.356723	0.174624
0.0292506	-0.0674178	G1/S transition of mitotic cell cycle	24	GO:0022402	cell cycle process	65	GO:0000082	1.35135	1.4e-05	2	0.0154734	-0.10849
-0.309187	0.182586	histone deacetylation	6	GO:0036211	protein modification process	66	GO:0016575	3.91061	1.5e-05	1	-0.356723	0.174624
0.276236	0.19311	maintenance of cell number	74	GO:0098727	maintenance of cell number	2	GO:0098727	3.125	1.5e-05	4	0.314749	0.225188
0.359049	0.276774	epithelial cell development	29	GO:0009888	tissue development	15	GO:0002064	5.88235	1.5e-05	4	0.314749	0.225188
-0.00400683	-0.11763	negative regulation of cytoskeleton organization	26	GO:0051128	regulation of cellular component organization	2	GO:0051494	3.96476	1.6e-05	2	0.0154734	-0.10849
-0.0239694	-0.0882079	regulation of actin filament-based process	58	GO:0030029	actin filament-based process	5	GO:0032970	2.94737	1.6e-05	2	0.0154734	-0.10849
0.0802504	-0.251516	chemotaxis	38	GO:0040011	locomotion	141	GO:0006935	3.01205	1.7e-05	3	0.060492	-0.328451
0.0620583	-0.203914	response to steroid hormone	2	GO:0070887	cellular response to chemical stimulus	14	GO:0048545	3.57143	1.8e-05	2	0.0154734	-0.10849
-0.413092	0.250818	purine nucleotide metabolic process	55	GO:0043603	cellular amide metabolic process	6	GO:0006163	3.0303	1.9e-05	1	-0.356723	0.174624
0.0601512	-0.182092	response to bacterium	63	GO:0044419	biological process involved in interspecies interaction between organisms	282	GO:0009617	1.71233	1.9e-05	2	0.0154734	-0.10849
0.312797	0.245357	positive regulation of nervous system development	30	GO:0051239	regulation of multicellular organismal process	0	GO:0051962	2.5	1.9e-05	4	0.314749	0.225188
-0.347032	0.117543	negative regulation of cellular amide metabolic process	55	GO:0043603	cellular amide metabolic process	0	GO:0034249	1.25	1.9e-05	1	-0.356723	0.174624
0.0791717	-0.35629	carboxylic acid transport	15	GO:0051179	localization	0	GO:0046942	3	2e-05	3	0.060492	-0.328451
0.0414482	-0.0323088	viral life cycle	73	GO:0016032	viral process	1	GO:0019058	3.50195	2e-05	2	0.0154734	-0.10849
0.0582244	-0.0941605	regulation of extent of cell growth	40	GO:0065008	regulation of biological quality	0	GO:0061387	1	2e-05	2	0.0154734	-0.10849
-0.411814	0.250651	purine ribonucleotide metabolic process	71	GO:1901135	carbohydrate derivative metabolic process	0	GO:0009150	2.33645	2e-05	1	-0.356723	0.174624
0.340504	0.254065	epidermis development	29	GO:0009888	tissue development	70	GO:0008544	4.7619	2e-05	4	0.314749	0.225188
0.0795947	-0.0854577	chromatin organization	25	GO:0007010	cytoskeleton organization	325	GO:0006325	2.44957	2e-05	2	0.0154734	-0.10849
0.311967	0.234712	cell fate commitment	22	GO:0048468	cell development	89	GO:0045165	3.14961	2.1e-05	4	0.314749	0.225188
0.00544865	-0.101749	negative regulation of cell projection organization	26	GO:0051128	regulation of cellular component organization	4	GO:0031345	1.63934	2.1e-05	2	0.0154734	-0.10849
0.0535642	-0.155014	response to oxygen levels	64	GO:0009628	response to abiotic stimulus	52	GO:0070482	0.956938	2.1e-05	2	0.0154734	-0.10849
0.0325523	-0.0942652	positive regulation of cell growth	49	GO:0040007	growth	108	GO:0030307	2.29885	2.2e-05	4	0.314749	0.225188
0.377829	0.285189	cardiac muscle cell proliferation	52	GO:0042127	regulation of cell population proliferation	22	GO:0060038	6.55738	2.2e-05	2	0.0154734	-0.10849
0.060315	-0.340313	secretion by cell	15	GO:0051179	localization	11	GO:0032940	1.43149	2.3e-05	3	0.060492	-0.328451
0.0285343	-0.0680081	nuclear chromosome segregation	72	GO:0007059	chromosome segregation	1	GO:0098813	2.29008	2.3e-05	2	0.0154734	-0.10849
0.350412	0.270703	neural crest cell differentiation	22	GO:0048468	cell development	12	GO:0014033	5.26316	2.3e-05	4	0.314749	0.225188
0.435847	0.337707	angiogenesis	57	GO:0072359	circulatory system development	313	GO:0001525	1.69082	2.3e-05	4	0.314749	0.225188
0.0103958	-0.389374	regulation of intracellular transport	15	GO:0051179	localization	4	GO:0032386	2.38663	2.3e-05	3	0.060492	-0.328451
0.00461911	-0.378887	regulation of vesicle-mediated transport	18	GO:0016192	vesicle-mediated transport	6	GO:0060627	2.00445	2.4e-05	3	0.060492	-0.328451
0.390776	0.297038	camera-type eye development	28	GO:0048513	animal organ development	81	GO:0043010	3.27869	2.4e-05	4	0.314749	0.225188
0.0757703	-0.0796672	heterochromatin organization	25	GO:0007010	cytoskeleton organization	12	GO:0070828	3.72671	2.5e-05	2	0.0154734	-0.10849
-0.218933	0.0603115	regulation of gene expression, epigenetic	25	GO:0007010	cytoskeleton organization	27	GO:0040029	2.9661	2.6e-05	2	0.0154734	-0.10849
0.239346	0.149209	gamete generation	46	GO:0000003	reproduction	28	GO:0007276	1.46341	2.7e-05	4	0.314749	0.225188
0.0608477	-0.193039	response to leukemia inhibitory factor	2	GO:0070887	cellular response to chemical stimulus	1	GO:1990823	3.125	2.7e-05	2	0.0154734	-0.10849
0.0452417	-0.204589	cellular response to leukemia inhibitory factor	2	GO:0070887	cellular response to chemical stimulus	312	GO:1990830	3.125	2.7e-05	2	0.0154734	-0.10849
0.0530619	-0.16645	response to hypoxia	64	GO:0009628	response to abiotic stimulus	147	GO:0001666	0.531915	2.8e-05	2	0.0154734	-0.10849
0.360977	0.278765	mesenchymal cell development	29	GO:0009888	tissue development	8	GO:0014031	6.25	2.8e-05	4	0.314749	0.225188
0.361803	0.279558	neural crest cell development	22	GO:0048468	cell development	26	GO:0014032	6.25	2.8e-05	4	0.314749	0.225188
0.0698365	-0.308883	ameboidal-type cell migration	19	GO:0048870	cell motility	7	GO:0001667	3.09278	2.8e-05	3	0.060492	-0.328451
0.402522	0.302286	myeloid cell differentiation	45	GO:0002376	immune system process	33	GO:0030099	2.67857	2.9e-05	4	0.314749	0.225188
0.0289661	-0.0668419	cell cycle G1/S phase transition	24	GO:0022402	cell cycle process	2	GO:0044843	1.32159	2.9e-05	2	0.0154734	-0.10849
0.0179905	-0.121946	trans-synaptic signaling	54	GO:0007267	cell-cell signaling	0	GO:0099537	1.74672	2.9e-05	2	0.0154734	-0.10849
0.307819	0.250041	positive regulation of neurogenesis	1	GO:0050793	regulation of developmental process	53	GO:0050769	2.20264	3e-05	4	0.314749	0.225188
-0.228186	0.0516972	heterochromatin assembly	25	GO:0007010	cytoskeleton organization	23	GO:0031507	4.05405	3e-05	2	0.0154734	-0.10849
-0.232788	0.0579329	negative regulation of gene expression, epigenetic	25	GO:0007010	cytoskeleton organization	19	GO:0045814	4.05405	3e-05	2	0.0154734	-0.10849
0.0740323	-0.211182	taxis	38	GO:0040011	locomotion	0	GO:0042330	2.97619	3e-05	3	0.060492	-0.328451
0.36077	0.27438	sensory organ development	75	GO:0007423	sensory organ development	8	GO:0007423	3.73333	3.1e-05	4	0.314749	0.225188
0.0280164	-0.122037	regulation of chromosome organization	26	GO:0051128	regulation of cellular component organization	21	GO:0033044	2.15054	3.1e-05	2	0.0154734	-0.10849
0.046307	-0.205217	cellular response to carbohydrate stimulus	2	GO:0070887	cellular response to chemical stimulus	5	GO:0071322	0.819672	3.2e-05	2	0.0154734	-0.10849
0.293255	0.204692	stem cell population maintenance	74	GO:0098727	maintenance of cell number	88	GO:0019827	3.19149	3.2e-05	4	0.314749	0.225188
0.382084	0.299129	cardiocyte differentiation	57	GO:0072359	circulatory system development	1	GO:0035051	3.01205	3.2e-05	4	0.314749	0.225188
0.0799514	-0.354939	secretion	15	GO:0051179	localization	5	GO:0046903	1.48976	3.3e-05	3	0.060492	-0.328451
-0.0249163	-0.104571	regulation of cell cycle phase transition	24	GO:0022402	cell cycle process	2	GO:1901987	0.738916	3.4e-05	2	0.0154734	-0.10849
0.0800577	-0.369537	protein import	15	GO:0051179	localization	5	GO:0017038	1.45455	3.5e-05	3	0.060492	-0.328451
0.0534175	-0.153281	response to decreased oxygen levels	64	GO:0009628	response to abiotic stimulus	1	GO:0036293	0.510204	3.5e-05	2	0.0154734	-0.10849
0.0770848	-0.107934	sister chromatid segregation	72	GO:0007059	chromosome segregation	3	GO:0000819	2.7027	3.5e-05	2	0.0154734	-0.10849
0.0785173	-0.0799362	endoplasmic reticulum organization	65	GO:0010256	endomembrane system organization	52	GO:0007029	3.79747	3.7e-05	2	0.0154734	-0.10849
0.287588	0.203986	developmental maturation	76	GO:0021700	developmental maturation	0	GO:0021700	1.04167	3.7e-05	4	0.314749	0.225188
0.355828	0.261817	peripheral nervous system development	9	GO:0030182	neuron differentiation	31	GO:0007422	7.69231	3.7e-05	4	0.314749	0.225188
-0.327149	0.117273	negative regulation of catabolic process	17	GO:1901575	organic substance catabolic process	1	GO:0009895	1.44928	3.8e-05	1	-0.356723	0.174624
0.0524142	-0.0443543	meiotic cell cycle	46	GO:0000003	reproduction	188	GO:0051321	2.18579	3.8e-05	2	0.0154734	-0.10849
0.224927	0.137226	muscle system process	53	GO:0003008	system process	2	GO:0003012	2.63158	3.8e-05	4	0.314749	0.225188
0.0310921	-0.128363	regulation of actin filament organization	26	GO:0051128	regulation of cellular component organization	4	GO:0110053	2.83505	3.9e-05	2	0.0154734	-0.10849
-0.304988	0.182521	carboxylic acid metabolic process	68	GO:0055086	nucleobase-containing small molecule metabolic process	16	GO:0019752	2.7933	4e-05	1	-0.356723	0.174624
0.0617494	-0.327234	protein localization to cell surface	36	GO:0008104	protein localization	37	GO:0034394	5.76923	4.1e-05	3	0.060492	-0.328451
0.0179269	-0.0298837	process utilizing autophagic mechanism	77	GO:0061919	process utilizing autophagic mechanism	0	GO:0061919	1.41844	4.1e-05	1	-0.356723	0.174624
-0.295715	0.171957	autophagy	77	GO:0061919	process utilizing autophagic mechanism	208	GO:0006914	1.41844	4.1e-05	1	-0.356723	0.174624
0.332307	0.254591	striated muscle cell differentiation	67	GO:0061061	muscle structure development	21	GO:0051146	2.37154	4.2e-05	4	0.314749	0.225188
0.029656	-0.128719	regulation of actin cytoskeleton organization	58	GO:0030029	actin filament-based process	95	GO:0032956	2.98165	4.2e-05	2	0.0154734	-0.10849
-0.0163843	-0.220639	regulation of small GTPase mediated signal transduction	35	GO:0035556	intracellular signal transduction	21	GO:0051056	2.3569	4.5e-05	2	0.0154734	-0.10849
-0.429191	0.173419	negative regulation of translation	14	GO:0009059	macromolecule biosynthetic process	116	GO:0017148	1.32159	4.5e-05	1	-0.356723	0.174624
0.079781	-0.361438	organic anion transport	15	GO:0051179	localization	31	GO:0015711	3.53982	4.6e-05	3	0.060492	-0.328451
-0.0598092	-0.0981686	negative regulation of cell cycle process	24	GO:0022402	cell cycle process	1	GO:0010948	1.38889	4.7e-05	2	0.0154734	-0.10849
-0.0199436	-0.211452	transmembrane receptor protein serine/threonine kinase signaling pathway	37	GO:0007166	cell surface receptor signaling pathway	23	GO:0007178	0.363636	4.7e-05	2	0.0154734	-0.10849
-0.0059644	-0.0600877	positive regulation of immune system process	45	GO:0002376	immune system process	2	GO:0002684	1.8595	4.7e-05	4	0.314749	0.225188
-0.429689	0.189106	mRNA catabolic process	17	GO:1901575	organic substance catabolic process	48	GO:0006402	1.94553	4.8e-05	1	-0.356723	0.174624
-0.317429	0.186107	alternative mRNA splicing, via spliceosome	42	GO:0016071	mRNA metabolic process	36	GO:0000380	2.08333	4.9e-05	1	-0.356723	0.174624
0.10798	-0.330573	vesicle budding from membrane	25	GO:0007010	cytoskeleton organization	15	GO:0006900	11.4286	4.9e-05	2	0.0154734	-0.10849
-0.0111514	-0.0734693	cellular chemical homeostasis	40	GO:0065008	regulation of biological quality	1	GO:0055082	1.67064	5e-05	2	0.0154734	-0.10849
0.231345	0.143338	circulatory system process	53	GO:0003008	system process	0	GO:0003013	4.10959	5.1e-05	4	0.314749	0.225188
0.346553	0.261152	muscle organ development	67	GO:0061061	muscle structure development	71	GO:0007517	1.76211	5.1e-05	4	0.314749	0.225188
0.0829203	-0.0786114	synapse organization	62	GO:0034330	cell junction organization	87	GO:0050808	2.15633	5.2e-05	2	0.0154734	-0.10849
0.289309	0.169342	negative regulation of neuron projection development	26	GO:0051128	regulation of cellular component organization	100	GO:0010977	0.763359	5.2e-05	2	0.0154734	-0.10849
0.0318086	-0.0332807	striated muscle cell proliferation	52	GO:0042127	regulation of cell population proliferation	0	GO:0014855	5.40541	5.2e-05	2	0.0154734	-0.10849
-0.354334	0.11703	negative regulation of phosphorus metabolic process	10	GO:0006793	phosphorus metabolic process	0	GO:0010563	2.01511	5.3e-05	1	-0.356723	0.174624
-0.354427	0.117101	negative regulation of phosphate metabolic process	10	GO:0006793	phosphorus metabolic process	0	GO:0045936	2.01511	5.3e-05	1	-0.356723	0.174624
0.0605195	-0.359141	transmembrane transport	15	GO:0051179	localization	436	GO:0055085	1.54143	5.5e-05	3	0.060492	-0.328451
0.346533	0.262834	axon ensheathment	9	GO:0030182	neuron differentiation	6	GO:0008366	4.58716	5.7e-05	4	0.314749	0.225188
0.346132	0.262396	myelination	9	GO:0030182	neuron differentiation	88	GO:0042552	4.58716	5.7e-05	4	0.314749	0.225188
0.346533	0.262834	ensheathment of neurons	9	GO:0030182	neuron differentiation	0	GO:0007272	4.58716	5.7e-05	4	0.314749	0.225188
0.37528	0.203093	regulation of axon extension	40	GO:0065008	regulation of biological quality	15	GO:0030516	1.14943	5.7e-05	2	0.0154734	-0.10849
0.342333	0.252823	morphogenesis of an epithelial sheet	29	GO:0009888	tissue development	13	GO:0002011	3.61446	5.8e-05	4	0.314749	0.225188
0.351975	0.265899	gland development	75	GO:0007423	sensory organ development	7	GO:0048732	2.54958	5.9e-05	4	0.314749	0.225188
-0.391761	0.159197	regulation of DNA metabolic process	60	GO:0006259	DNA metabolic process	0	GO:0051052	1.84843	5.9e-05	1	-0.356723	0.174624
-0.351879	0.127358	negative regulation of mRNA metabolic process	42	GO:0016071	mRNA metabolic process	0	GO:1903312	1.27389	6e-05	1	-0.356723	0.174624
-0.0137847	-0.193874	intracellular receptor signaling pathway	31	GO:0007154	cell communication	5	GO:0030522	3.41463	6.1e-05	2	0.0154734	-0.10849
-0.0543024	-0.212699	negative regulation of apoptotic signaling pathway	47	GO:0008219	cell death	46	GO:2001234	3.0303	6.1e-05	2	0.0154734	-0.10849
-0.00819627	-0.249557	cytokine-mediated signaling pathway	2	GO:0070887	cellular response to chemical stimulus	184	GO:0019221	2.54237	6.1e-05	2	0.0154734	-0.10849
-0.0194745	-0.229441	regulation of Wnt signaling pathway	54	GO:0007267	cell-cell signaling	24	GO:0030111	2.2293	6.1e-05	2	0.0154734	-0.10849
0.0327394	-0.125696	regulation of microtubule cytoskeleton organization	51	GO:0007017	microtubule-based process	45	GO:0070507	3.6036	6.2e-05	2	0.0154734	-0.10849
-0.305374	0.182755	oxoacid metabolic process	68	GO:0055086	nucleobase-containing small molecule metabolic process	0	GO:0043436	2.76243	6.2e-05	1	-0.356723	0.174624
0.0539199	-0.15959	response to radiation	64	GO:0009628	response to abiotic stimulus	17	GO:0009314	2.99003	6.3e-05	2	0.0154734	-0.10849
0.331024	0.256187	regulation of gliogenesis	9	GO:0030182	neuron differentiation	4	GO:0014013	2.17391	6.9e-05	4	0.314749	0.225188
0.0180449	-0.121903	anterograde trans-synaptic signaling	54	GO:0007267	cell-cell signaling	0	GO:0098916	1.78174	7e-05	2	0.0154734	-0.10849
0.0180449	-0.121903	chemical synaptic transmission	54	GO:0007267	cell-cell signaling	224	GO:0007268	1.78174	7e-05	2	0.0154734	-0.10849
0.0816668	-0.374387	cation transport	15	GO:0051179	localization	85	GO:0006812	1.38889	7.3e-05	3	0.060492	-0.328451
0.0666607	-0.0114002	leukocyte activation	78	GO:0045321	leukocyte activation	2	GO:0045321	2.84091	7.4e-05	4	0.314749	0.225188
0.359759	0.261856	regulation of hemopoiesis	45	GO:0002376	immune system process	5	GO:1903706	2.96296	7.5e-05	4	0.314749	0.225188
0.0161634	-0.411355	regulation of intracellular protein transport	15	GO:0051179	localization	8	GO:0033157	2.67176	7.7e-05	3	0.060492	-0.328451
0.382258	0.291805	sensory organ morphogenesis	75	GO:0007423	sensory organ development	0	GO:0090596	3.35196	7.7e-05	4	0.314749	0.225188
0.398149	0.228469	dendritic spine development	16	GO:0120036	plasma membrane bounded cell projection organization	24	GO:0060996	2.40964	7.7e-05	4	0.314749	0.225188
-0.123684	0.368113	cytokine production	21	GO:0010468	regulation of gene expression	43	GO:0001816	1.45833	7.7e-05	1	-0.356723	0.174624
-0.0162082	-0.208648	ERK1 and ERK2 cascade	35	GO:0035556	intracellular signal transduction	40	GO:0070371	2.40964	7.9e-05	2	0.0154734	-0.10849
-0.29237	0.175191	monocarboxylic acid metabolic process	68	GO:0055086	nucleobase-containing small molecule metabolic process	1	GO:0032787	2.5	8e-05	1	-0.356723	0.174624
0.080641	-0.0752237	cell-cell junction organization	62	GO:0034330	cell junction organization	34	GO:0045216	1.99005	8.1e-05	2	0.0154734	-0.10849
0.0586786	-0.176647	response to toxic substance	2	GO:0070887	cellular response to chemical stimulus	54	GO:0009636	3.84615	8.2e-05	2	0.0154734	-0.10849
-0.00174289	-0.0722058	regulation of protein stability	40	GO:0065008	regulation of biological quality	98	GO:0031647	2.90323	8.3e-05	2	0.0154734	-0.10849
-0.352759	0.213205	nucleoside diphosphate metabolic process	10	GO:0006793	phosphorus metabolic process	1	GO:0009132	2.65487	8.4e-05	1	-0.356723	0.174624
-0.0225705	-0.10367	regulation of mitotic cell cycle phase transition	24	GO:0022402	cell cycle process	10	GO:1901990	0.628931	8.5e-05	2	0.0154734	-0.10849
-0.40407	0.152051	regulation of protein serine/threonine kinase activity	27	GO:0065009	regulation of molecular function	6	GO:0071900	2.00573	8.7e-05	2	0.0154734	-0.10849
0.0800477	-0.11297	microtubule cytoskeleton organization involved in mitosis	24	GO:0022402	cell cycle process	2	GO:1902850	1.76471	8.9e-05	2	0.0154734	-0.10849
0.215762	0.117181	tissue migration	79	GO:0090130	tissue migration	0	GO:0090130	2.96296	8.9e-05	3	0.060492	-0.328451
0.21568	0.117105	epithelium migration	79	GO:0090130	tissue migration	1	GO:0090132	2.96296	8.9e-05	3	0.060492	-0.328451
0.224134	-0.152728	epithelial cell migration	79	GO:0090130	tissue migration	5	GO:0010631	2.96296	8.9e-05	3	0.060492	-0.328451
0.0588624	-0.169317	response to virus	66	GO:0043207	response to external biotic stimulus	85	GO:0009615	3.27869	9e-05	2	0.0154734	-0.10849
0.0760361	-0.332125	RNA localization	36	GO:0008104	protein localization	3	GO:0006403	2.18182	9e-05	3	0.060492	-0.328451
-0.0120294	-0.19947	Rho protein signal transduction	35	GO:0035556	intracellular signal transduction	70	GO:0007266	3.26797	9.1e-05	2	0.0154734	-0.10849
-0.394736	0.130053	positive regulation of protein serine/threonine kinase activity	27	GO:0065009	regulation of molecular function	53	GO:0071902	2.54237	9.9e-05	2	0.0154734	-0.10849
0.0789789	-0.0868055	chromatin assembly	25	GO:0007010	cytoskeleton organization	10	GO:0031497	4.05405	0.0001	2	0.0154734	-0.10849
-0.399345	0.241333	nucleotide biosynthetic process	10	GO:0006793	phosphorus metabolic process	9	GO:0009165	4.72441	0.0001	1	-0.356723	0.174624
-0.400725	0.24211	nucleoside phosphate biosynthetic process	10	GO:0006793	phosphorus metabolic process	0	GO:1901293	4.72441	0.0001	1	-0.356723	0.174624
0.0308635	-0.0303602	cell activation	78	GO:0045321	leukocyte activation	12	GO:0001775	2.58621	0.0001	4	0.314749	0.225188
0.0618181	-0.335703	cytosolic transport	5	GO:0070727	cellular macromolecule localization	2	GO:0016482	2.73224	0.0001	3	0.060492	-0.328451
0.0793899	-0.0808141	protein-containing complex disassembly	44	GO:0065003	protein-containing complex assembly	8	GO:0032984	2.90909	0.00011	2	0.0154734	-0.10849
0.389221	0.289701	myeloid leukocyte differentiation	45	GO:0002376	immune system process	7	GO:0002573	2.87356	0.00011	4	0.314749	0.225188
-0.310599	0.20244	small molecule biosynthetic process	68	GO:0055086	nucleobase-containing small molecule metabolic process	0	GO:0044283	1.9084	0.00011	1	-0.356723	0.174624
-0.0203943	-0.086464	regulation of microtubule-based process	51	GO:0007017	microtubule-based process	18	GO:0032886	3.125	0.00011	2	0.0154734	-0.10849
0.0132687	-0.384362	regulation of protein localization to membrane	36	GO:0008104	protein localization	6	GO:1905475	1.43541	0.00011	3	0.060492	-0.328451
-0.00558965	-0.111214	negative regulation of supramolecular fiber organization	26	GO:0051128	regulation of cellular component organization	1	GO:1902904	4.05405	0.00011	2	0.0154734	-0.10849
0.362591	0.277195	astrocyte differentiation	9	GO:0030182	neuron differentiation	12	GO:0048708	1.35135	0.00011	4	0.314749	0.225188
-0.363939	0.215223	protein modification by small protein conjugation	6	GO:0036211	protein modification process	14	GO:0032446	1.72414	0.00011	1	-0.356723	0.174624
0.000277556	-0.0706379	protein stabilization	40	GO:0065008	regulation of biological quality	228	GO:0050821	2.65957	0.00012	2	0.0154734	-0.10849
0.0406071	-0.0278063	rhythmic process	80	GO:0048511	rhythmic process	153	GO:0048511	2.54237	0.00012	2	0.0154734	-0.10849
0.301804	0.158197	positive regulation of neuron projection development	16	GO:0120036	plasma membrane bounded cell projection organization	194	GO:0010976	0.881057	0.00012	2	0.0154734	-0.10849
0.0440746	-0.110866	regulation of plasma membrane bounded cell projection assembly	16	GO:0120036	plasma membrane bounded cell projection organization	0	GO:0120032	4.6875	0.00012	2	0.0154734	-0.10849
-0.358433	0.123418	positive regulation of mRNA metabolic process	42	GO:0016071	mRNA metabolic process	0	GO:1903313	2.12766	0.00012	1	-0.356723	0.174624
-0.0642745	-0.0730366	negative regulation of cell adhesion	59	GO:0007155	cell adhesion	60	GO:0007162	3.52941	0.00012	2	0.0154734	-0.10849
-0.0156385	-0.220552	stress-activated MAPK cascade	11	GO:0006950	response to stress	17	GO:0051403	1.55642	0.00013	2	0.0154734	-0.10849
0.0529937	-0.148762	response to ionizing radiation	64	GO:0009628	response to abiotic stimulus	51	GO:0010212	5.9322	0.00013	2	0.0154734	-0.10849
0.351571	0.266381	Schwann cell differentiation	9	GO:0030182	neuron differentiation	8	GO:0014037	6.25	0.00013	4	0.314749	0.225188
-0.00427111	-0.207405	regulation of defense response	34	GO:0048583	regulation of response to stimulus	0	GO:0031347	2.08333	0.00014	2	0.0154734	-0.10849
0.057031	-0.160898	cellular response to external stimulus	7	GO:0009605	response to external stimulus	0	GO:0071496	2.39726	0.00014	2	0.0154734	-0.10849
-0.38183	0.134998	positive regulation of DNA metabolic process	60	GO:0006259	DNA metabolic process	6	GO:0051054	1.983	0.00014	1	-0.356723	0.174624
-0.145161	0.311412	regulation of cytokine production	21	GO:0010468	regulation of gene expression	58	GO:0001817	1.1236	0.00014	1	-0.356723	0.174624
0.0246696	-0.0383726	cell-substrate adhesion	59	GO:0007155	cell adhesion	24	GO:0031589	1.78571	0.00015	2	0.0154734	-0.10849
0.0439457	-0.0279669	locomotory behavior	81	GO:0007626	locomotory behavior	131	GO:0007626	3.37838	0.00015	2	0.0154734	-0.10849
-0.0156166	-0.219394	stress-activated protein kinase signaling cascade	11	GO:0006950	response to stress	7	GO:0031098	1.50376	0.00015	2	0.0154734	-0.10849
-0.36006	0.214891	protein dephosphorylation	10	GO:0006793	phosphorus metabolic process	195	GO:0006470	4.39024	0.00015	1	-0.356723	0.174624
0.07515	-0.0783761	chromosome condensation	25	GO:0007010	cytoskeleton organization	30	GO:0030261	2.27273	0.00016	2	0.0154734	-0.10849
0.0773745	-0.337311	nucleobase-containing compound transport	15	GO:0051179	localization	0	GO:0015931	2.40964	0.00016	3	0.060492	-0.328451
0.323654	0.241632	osteoblast differentiation	70	GO:0001503	ossification	102	GO:0001649	3.92157	0.00016	4	0.314749	0.225188
0.0321321	-0.119988	regulation of cell junction assembly	62	GO:0034330	cell junction organization	7	GO:1901888	2.40964	0.00016	2	0.0154734	-0.10849
0.0179025	-0.122213	synaptic signaling	54	GO:0007267	cell-cell signaling	5	GO:0099536	1.8595	0.00016	2	0.0154734	-0.10849
0.045371	-0.201396	cellular response to tumor necrosis factor	2	GO:0070887	cellular response to chemical stimulus	115	GO:0071356	0.787402	0.00016	2	0.0154734	-0.10849
0.171807	0.097302	regulation of muscle system process	53	GO:0003008	system process	2	GO:0090257	2.12766	0.00017	4	0.314749	0.225188
-0.0179145	-0.100646	regulation of G1/S transition of mitotic cell cycle	24	GO:0022402	cell cycle process	35	GO:2000045	1.38889	0.00017	2	0.0154734	-0.10849
0.230728	0.14277	blood circulation	53	GO:0003008	system process	10	GO:0008015	3.89105	0.00017	4	0.314749	0.225188
-0.00523217	-0.0669199	regulation of viral genome replication	73	GO:0016032	viral process	11	GO:0045069	3	0.00017	2	0.0154734	-0.10849
0.0410357	-0.192425	cellular response to extracellular stimulus	7	GO:0009605	response to external stimulus	22	GO:0031668	2.72374	0.00018	2	0.0154734	-0.10849
-0.353276	0.117284	negative regulation of phosphorylation	10	GO:0006793	phosphorus metabolic process	24	GO:0042326	2.31884	0.00019	1	-0.356723	0.174624
-0.331289	0.198483	organophosphate catabolic process	10	GO:0006793	phosphorus metabolic process	1	GO:0046434	6.25	0.00019	1	-0.356723	0.174624
0.0145777	-0.376317	regulation of protein localization to nucleus	36	GO:0008104	protein localization	10	GO:1900180	1.32159	0.00019	3	0.060492	-0.328451
-0.0519915	-0.213927	negative regulation of Wnt signaling pathway	54	GO:0007267	cell-cell signaling	76	GO:0030178	2.29885	0.00019	2	0.0154734	-0.10849
0.0612588	-0.355615	cation transmembrane transport	15	GO:0051179	localization	31	GO:0098655	1.38889	0.0002	3	0.060492	-0.328451
-0.0158297	-0.351538	positive regulation of transmembrane transport	15	GO:0051179	localization	0	GO:0034764	3.26797	0.0002	3	0.060492	-0.328451
0.315484	0.237777	myotube differentiation	67	GO:0061061	muscle structure development	23	GO:0014902	1.08696	0.0002	4	0.314749	0.225188
-0.317346	0.112828	gene silencing by RNA	13	GO:0048523	negative regulation of cellular process	62	GO:0031047	2.7027	0.0002	1	-0.356723	0.174624
-0.330544	0.121143	negative regulation of mRNA processing	42	GO:0016071	mRNA metabolic process	0	GO:0050686	1.14943	0.0002	1	-0.356723	0.174624
-0.347026	0.209828	ribonucleoside diphosphate metabolic process	10	GO:0006793	phosphorus metabolic process	5	GO:0009185	2.75229	0.0002	1	-0.356723	0.174624
0.300506	0.216087	anatomical structure maturation	76	GO:0021700	developmental maturation	0	GO:0071695	0.675676	0.0002	4	0.314749	0.225188
0.0411278	-0.191146	cellular response to nutrient levels	7	GO:0009605	response to external stimulus	17	GO:0031669	2.1645	0.0002	2	0.0154734	-0.10849
0.33977	0.252636	regulation of myeloid cell differentiation	45	GO:0002376	immune system process	6	GO:0045637	3.27869	0.00021	4	0.314749	0.225188
-0.32555	0.194985	ribose phosphate biosynthetic process	71	GO:1901135	carbohydrate derivative metabolic process	4	GO:0046390	5.50459	0.00021	1	-0.356723	0.174624
-0.23352	0.133171	generation of precursor metabolites and energy	83	GO:0006091	generation of precursor metabolites and energy	14	GO:0006091	3.05344	0.00021	2	0.0154734	-0.10849
0.0734351	-0.293238	maintenance of location	82	GO:0051235	maintenance of location	0	GO:0051235	2.40964	0.00021	3	0.060492	-0.328451
0.404602	0.308349	eye morphogenesis	28	GO:0048513	animal organ development	5	GO:0048592	3.38983	0.00021	4	0.314749	0.225188
0.0439644	-0.0279966	behavior	81	GO:0007626	locomotory behavior	20	GO:0007610	1.89125	0.00021	2	0.0154734	-0.10849
0.0597024	-0.31578	maintenance of location in cell	82	GO:0051235	maintenance of location	1	GO:0051651	2.73224	0.00022	3	0.060492	-0.328451
0.021608	-0.116117	positive regulation of plasma membrane bounded cell projection assembly	16	GO:0120036	plasma membrane bounded cell projection organization	1	GO:0120034	6.19469	0.00022	2	0.0154734	-0.10849
0.0607696	-0.397444	regulation of endocytosis	18	GO:0016192	vesicle-mediated transport	45	GO:0030100	3.11284	0.00022	3	0.060492	-0.328451
0.100943	-0.167193	innate immune response	66	GO:0043207	response to external biotic stimulus	694	GO:0045087	2.01511	0.00022	2	0.0154734	-0.10849
0.0405993	-0.0277927	circadian rhythm	80	GO:0048511	rhythmic process	93	GO:0007623	2.23464	0.00022	2	0.0154734	-0.10849
0.0789646	-0.0728458	tight junction organization	62	GO:0034330	cell junction organization	6	GO:0120193	3.07692	0.00022	2	0.0154734	-0.10849
0.0436741	-0.111194	regulation of cell projection assembly	16	GO:0120036	plasma membrane bounded cell projection organization	6	GO:0060491	4.39024	0.00022	2	0.0154734	-0.10849
-0.356918	0.212763	protein autophosphorylation	10	GO:0006793	phosphorus metabolic process	232	GO:0046777	1.983	0.00023	1	-0.356723	0.174624
-0.0213224	-0.227555	regulation of apoptotic signaling pathway	47	GO:0008219	cell death	4	GO:2001233	3.31492	0.00023	2	0.0154734	-0.10849
0.289594	0.204835	regeneration	84	GO:0031099	regeneration	1	GO:0031099	2.3622	0.00024	4	0.314749	0.225188
-0.00572409	-0.0765483	regulation of hormone levels	40	GO:0065008	regulation of biological quality	5	GO:0010817	0	0.00024	2	0.0154734	-0.10849
0.375759	0.28189	renal system development	28	GO:0048513	animal organ development	1	GO:0072001	2.64317	0.00024	4	0.314749	0.225188
-0.00764812	-0.366236	positive regulation of protein localization to membrane	36	GO:0008104	protein localization	6	GO:1905477	1.5748	0.00025	3	0.060492	-0.328451
0.0777982	-0.0739837	membrane invagination	62	GO:0034330	cell junction organization	6	GO:0010324	8.77193	0.00025	2	0.0154734	-0.10849
0.332377	0.238051	spermatogenesis	46	GO:0000003	reproduction	506	GO:0007283	1.3289	0.00025	4	0.314749	0.225188
0.327863	0.247454	cell maturation	76	GO:0021700	developmental maturation	50	GO:0048469	1.14943	0.00025	4	0.314749	0.225188
0.33246	0.243471	epiboly	29	GO:0009888	tissue development	0	GO:0090504	4.54545	0.00026	4	0.314749	0.225188
0.336229	0.129387	epiboly involved in wound healing	29	GO:0009888	tissue development	0	GO:0090505	4.54545	0.00026	4	0.314749	0.225188
0.34554	-0.104923	wound healing, spreading of cells	29	GO:0009888	tissue development	15	GO:0044319	4.54545	0.00026	4	0.314749	0.225188
0.209988	0.123864	neuromuscular process	53	GO:0003008	system process	44	GO:0050905	1	0.00026	4	0.314749	0.225188
0.0311789	-0.119038	regulation of nuclear division	25	GO:0007010	cytoskeleton organization	0	GO:0051783	2.85714	0.00026	2	0.0154734	-0.10849
-0.286125	0.165775	cellular lipid metabolic process	85	GO:0044255	cellular lipid metabolic process	34	GO:0044255	2.75229	0.00026	2	0.0154734	-0.10849
0.0770376	-0.108693	mitotic sister chromatid segregation	72	GO:0007059	chromosome segregation	37	GO:0000070	3.125	0.00027	2	0.0154734	-0.10849
0.0830648	-0.0952465	actin filament bundle assembly	26	GO:0051128	regulation of cellular component organization	53	GO:0051017	2.91667	0.00027	2	0.0154734	-0.10849
0.0814886	-0.0908161	actin filament bundle organization	26	GO:0051128	regulation of cellular component organization	4	GO:0061572	2.91667	0.00027	2	0.0154734	-0.10849
-0.428783	0.176251	regulation of mRNA catabolic process	42	GO:0016071	mRNA metabolic process	1	GO:0061013	1.8018	0.00029	1	-0.356723	0.174624
-0.0082779	-0.0688441	regulation of viral process	73	GO:0016032	viral process	1	GO:0050792	2.18579	0.00029	2	0.0154734	-0.10849
0.168696	0.0938798	regulation of muscle contraction	53	GO:0003008	system process	24	GO:0006937	3.26087	0.0003	4	0.314749	0.225188
0.0786908	-0.353083	lipid localization	36	GO:0008104	protein localization	1	GO:0010876	1.86916	0.0003	3	0.060492	-0.328451
0.0316193	-0.14027	regulation of mitotic nuclear division	25	GO:0007010	cytoskeleton organization	25	GO:0007088	3.125	0.0003	2	0.0154734	-0.10849
-0.39138	0.237016	ribonucleotide biosynthetic process	71	GO:1901135	carbohydrate derivative metabolic process	0	GO:0009260	5	0.0003	1	-0.356723	0.174624
0.0307726	-0.120327	regulation of protein polymerization	44	GO:0065003	protein-containing complex assembly	0	GO:0032271	2.95082	0.0003	2	0.0154734	-0.10849
0.0615478	-0.185188	response to nutrient	7	GO:0009605	response to external stimulus	21	GO:0007584	1.92308	0.0003	2	0.0154734	-0.10849
0.0612485	-0.359901	ion transmembrane transport	15	GO:0051179	localization	77	GO:0034220	1.69972	0.0003	3	0.060492	-0.328451
0.144304	0.0588632	temperature homeostasis	40	GO:0065008	regulation of biological quality	26	GO:0001659	5.51181	0.00031	2	0.0154734	-0.10849
0.0812757	-0.0937762	microtubule depolymerization	51	GO:0007017	microtubule-based process	20	GO:0007019	4.05405	0.00031	2	0.0154734	-0.10849
-0.318035	0.113804	post-transcriptional gene silencing	21	GO:0010468	regulation of gene expression	8	GO:0016441	2.22222	0.00032	1	-0.356723	0.174624
-0.00189211	-0.0686075	cellular glucose homeostasis	40	GO:0065008	regulation of biological quality	32	GO:0001678	0.847458	0.00032	2	0.0154734	-0.10849
0.0813595	-0.0891868	actomyosin structure organization	58	GO:0030029	actin filament-based process	38	GO:0031032	3.81679	0.00032	2	0.0154734	-0.10849
0.059827	-0.183115	response to epidermal growth factor	2	GO:0070887	cellular response to chemical stimulus	3	GO:0070849	2.7027	0.00032	2	0.0154734	-0.10849
-0.244913	0.126006	spliceosomal complex assembly	44	GO:0065003	protein-containing complex assembly	19	GO:0000245	6.52174	0.00033	2	0.0154734	-0.10849
-0.0205055	-0.0716938	positive regulation of viral genome replication	73	GO:0016032	viral process	28	GO:0045070	4.16667	0.00033	2	0.0154734	-0.10849
0.34694	0.260069	regulation of leukocyte differentiation	45	GO:0002376	immune system process	0	GO:1902105	3.57143	0.00033	4	0.314749	0.225188
0.392642	0.29855	kidney development	28	GO:0048513	animal organ development	181	GO:0001822	2.75229	0.00033	4	0.314749	0.225188
0.0266757	-0.0337384	cell recognition	86	GO:0008037	cell recognition	7	GO:0008037	4.34783	0.00034	2	0.0154734	-0.10849
0.417086	0.242691	dendrite development	16	GO:0120036	plasma membrane bounded cell projection organization	61	GO:0016358	2.40964	0.00035	4	0.314749	0.225188
-0.0074212	-0.0683079	regulation of viral life cycle	73	GO:0016032	viral process	2	GO:1903900	2.7027	0.00035	2	0.0154734	-0.10849
0.0465171	-0.211986	cellular response to steroid hormone stimulus	2	GO:0070887	cellular response to chemical stimulus	12	GO:0071383	3.52941	0.00035	2	0.0154734	-0.10849
0.0776373	-0.348081	establishment of RNA localization	36	GO:0008104	protein localization	0	GO:0051236	2.1645	0.00036	3	0.060492	-0.328451
0.0765352	-0.330457	nucleic acid transport	15	GO:0051179	localization	0	GO:0050657	2.1645	0.00036	3	0.060492	-0.328451
0.0792233	-0.359458	RNA transport	15	GO:0051179	localization	6	GO:0050658	2.1645	0.00036	3	0.060492	-0.328451
0.195811	0.110288	adult locomotory behavior	81	GO:0007626	locomotory behavior	73	GO:0008344	4.91803	0.00037	2	0.0154734	-0.10849
-0.0179156	-0.0775795	regulation of binding	27	GO:0065009	regulation of molecular function	5	GO:0051098	1.95122	0.00038	2	0.0154734	-0.10849
0.234795	0.145053	male gamete generation	46	GO:0000003	reproduction	4	GO:0048232	1.31148	0.00038	4	0.314749	0.225188
-0.0521386	-0.212594	negative regulation of MAPK cascade	31	GO:0007154	cell communication	60	GO:0043409	4.4586	0.00038	2	0.0154734	-0.10849
-0.0190037	-0.100743	regulation of cell cycle G1/S phase transition	24	GO:0022402	cell cycle process	10	GO:1902806	1.35135	0.00038	2	0.0154734	-0.10849
-0.362357	0.212502	DNA recombination	60	GO:0006259	DNA metabolic process	85	GO:0006310	2.81124	0.00039	1	-0.356723	0.174624
0.0312968	-0.124376	regulation of organelle assembly	26	GO:0051128	regulation of cellular component organization	7	GO:1902115	2.87081	0.00039	2	0.0154734	-0.10849
0.0809206	-0.0850578	protein polymerization	44	GO:0065003	protein-containing complex assembly	14	GO:0051258	3.18841	0.00039	2	0.0154734	-0.10849
-0.0375008	-0.106628	positive regulation of mitotic cell cycle phase transition	24	GO:0022402	cell cycle process	3	GO:1901992	0.819672	0.00039	2	0.0154734	-0.10849
-0.330936	0.122291	negative regulation of mRNA splicing, via spliceosome	42	GO:0016071	mRNA metabolic process	30	GO:0048025	1.53846	0.0004	1	-0.356723	0.174624
0.0661118	-0.216819	response to molecule of bacterial origin	63	GO:0044419	biological process involved in interspecies interaction between organisms	12	GO:0002237	1.63934	0.0004	2	0.0154734	-0.10849
0.0812566	-0.375867	lipid transport	36	GO:0008104	protein localization	145	GO:0006869	1.76471	0.0004	3	0.060492	-0.328451
0.328108	0.255821	regulation of neuron differentiation	1	GO:0050793	regulation of developmental process	43	GO:0045664	2.61438	0.0004	4	0.314749	0.225188
0.220915	-0.151292	endothelial cell migration	79	GO:0090130	tissue migration	47	GO:0043542	2.29885	0.0004	3	0.060492	-0.328451
0.0463289	-0.204806	cellular response to monosaccharide stimulus	2	GO:0070887	cellular response to chemical stimulus	0	GO:0071326	0.952381	0.00041	2	0.0154734	-0.10849
0.0463248	-0.204731	cellular response to hexose stimulus	2	GO:0070887	cellular response to chemical stimulus	0	GO:0071331	0.952381	0.00041	2	0.0154734	-0.10849
0.0191592	-0.221358	cellular response to glucose stimulus	2	GO:0070887	cellular response to chemical stimulus	58	GO:0071333	0.952381	0.00041	2	0.0154734	-0.10849
0.314161	0.241201	regulation of glial cell differentiation	9	GO:0030182	neuron differentiation	1	GO:0045685	2.08333	0.00041	4	0.314749	0.225188
0.00793451	-0.0542589	regulation of lymphocyte activation	78	GO:0045321	leukocyte activation	1	GO:0051249	3.15315	0.00042	4	0.314749	0.225188
0.34929	0.203308	positive regulation of axonogenesis	16	GO:0120036	plasma membrane bounded cell projection organization	49	GO:0050772	2.17391	0.00042	2	0.0154734	-0.10849
-0.337295	0.0608	double-strand break repair	60	GO:0006259	DNA metabolic process	100	GO:0006302	3.43511	0.00043	1	-0.356723	0.174624
0.0667043	-0.0114753	lymphocyte activation	78	GO:0045321	leukocyte activation	5	GO:0046649	3.00926	0.00043	4	0.314749	0.225188
-0.0468779	-0.23957	positive regulation of MAPK cascade	35	GO:0035556	intracellular signal transduction	226	GO:0043410	1.76322	0.00043	2	0.0154734	-0.10849
0.347702	0.267999	epidermal cell differentiation	29	GO:0009888	tissue development	12	GO:0009913	5.34351	0.00043	4	0.314749	0.225188
-0.389411	0.171103	regulation of proteolysis	23	GO:0032268	regulation of cellular protein metabolic process	24	GO:0030162	1.17647	0.00043	1	-0.356723	0.174624
0.0289714	-0.0344758	epithelial cell proliferation	52	GO:0042127	regulation of cell population proliferation	15	GO:0050673	2.11268	0.00044	2	0.0154734	-0.10849
0.0809976	-0.369002	metal ion transport	15	GO:0051179	localization	28	GO:0030001	1.61725	0.00044	3	0.060492	-0.328451
-0.0393321	-0.107023	positive regulation of cell cycle phase transition	24	GO:0022402	cell cycle process	0	GO:1901989	0.675676	0.00045	2	0.0154734	-0.10849
0.422193	0.325081	embryonic organ morphogenesis	43	GO:0009790	embryo development	6	GO:0048562	3.38983	0.00045	4	0.314749	0.225188
0.0801208	-0.078362	tight junction assembly	62	GO:0034330	cell junction organization	6	GO:0120192	1.63934	0.00045	2	0.0154734	-0.10849
-0.302578	0.194057	carbohydrate derivative biosynthetic process	71	GO:1901135	carbohydrate derivative metabolic process	2	GO:1901137	2.75229	0.00045	1	-0.356723	0.174624
-0.275764	0.18057	hexose metabolic process	87	GO:0005996	monosaccharide metabolic process	1	GO:0019318	1.53061	0.00045	1	-0.356723	0.174624
-0.27788	0.181948	monosaccharide metabolic process	87	GO:0005996	monosaccharide metabolic process	2	GO:0005996	1.53061	0.00045	1	-0.356723	0.174624
-0.0369337	-0.144381	regulation of trans-synaptic signaling	54	GO:0007267	cell-cell signaling	0	GO:0099177	2.26629	0.00046	2	0.0154734	-0.10849
-0.0369196	-0.144378	modulation of chemical synaptic transmission	54	GO:0007267	cell-cell signaling	124	GO:0050804	2.26629	0.00046	2	0.0154734	-0.10849
-0.0398184	-0.106317	positive regulation of mitotic cell cycle	24	GO:0022402	cell cycle process	39	GO:0045931	1.20482	0.00046	2	0.0154734	-0.10849
-0.0102907	-0.361435	negative regulation of protein localization	36	GO:0008104	protein localization	3	GO:1903828	0.478469	0.00046	3	0.060492	-0.328451
0.021506	-0.398085	regulation of ion transport	15	GO:0051179	localization	9	GO:0043269	1.52905	0.00046	3	0.060492	-0.328451
0.0624908	-0.331774	retrograde transport, endosome to Golgi	5	GO:0070727	cellular macromolecule localization	93	GO:0042147	2.75229	0.00046	3	0.060492	-0.328451
-0.0136713	-0.354395	positive regulation of ion transmembrane transport	15	GO:0051179	localization	6	GO:0034767	4.16667	0.00047	3	0.060492	-0.328451
0.0779686	-0.078053	ribonucleoprotein complex subunit organization	44	GO:0065003	protein-containing complex assembly	0	GO:0071826	2.33463	0.00048	2	0.0154734	-0.10849
-0.022251	-0.215712	apoptotic signaling pathway	47	GO:0008219	cell death	61	GO:0097190	2.6643	0.00048	2	0.0154734	-0.10849
-0.344473	0.208271	purine ribonucleoside diphosphate metabolic process	10	GO:0006793	phosphorus metabolic process	0	GO:0009179	1.90476	0.00048	1	-0.356723	0.174624
-0.345331	0.208803	purine nucleoside diphosphate metabolic process	10	GO:0006793	phosphorus metabolic process	0	GO:0009135	1.90476	0.00048	1	-0.356723	0.174624
-0.372973	0.227722	ADP metabolic process	10	GO:0006793	phosphorus metabolic process	2	GO:0046031	1.90476	0.00048	1	-0.356723	0.174624
0.0953479	-0.0665463	dendritic spine organization	16	GO:0120036	plasma membrane bounded cell projection organization	8	GO:0097061	3	0.00048	2	0.0154734	-0.10849
-0.27968	0.163108	dephosphorylation	10	GO:0006793	phosphorus metabolic process	115	GO:0016311	4.09836	0.0005	1	-0.356723	0.174624
0.0603907	-0.319004	spindle localization	5	GO:0070727	cellular macromolecule localization	6	GO:0051653	4.05405	0.0005	3	0.060492	-0.328451
0.0454671	-0.209942	cellular response to hypoxia	64	GO:0009628	response to abiotic stimulus	89	GO:0071456	1.08696	0.0005	2	0.0154734	-0.10849
0.342589	0.255748	regulation of heart growth	49	GO:0040007	growth	6	GO:0060420	3.79747	0.00051	4	0.314749	0.225188
0.336387	0.255592	regulation of vasculature development	57	GO:0072359	circulatory system development	2	GO:1901342	1.83486	0.00052	4	0.314749	0.225188
0.375252	0.290728	regulation of angiogenesis	57	GO:0072359	circulatory system development	38	GO:0045765	1.83486	0.00052	4	0.314749	0.225188
0.0359932	-0.162782	cellular response to environmental stimulus	4	GO:0050896	response to stimulus	0	GO:0104004	4.40529	0.00053	2	0.0154734	-0.10849
0.03798	-0.171252	cellular response to abiotic stimulus	4	GO:0050896	response to stimulus	0	GO:0071214	4.40529	0.00053	2	0.0154734	-0.10849
0.0931761	-0.0636587	neuron projection organization	16	GO:0120036	plasma membrane bounded cell projection organization	1	GO:0106027	2.75229	0.00053	2	0.0154734	-0.10849
-0.405414	0.167272	regulation of RNA stability	17	GO:1901575	organic substance catabolic process	1	GO:0043487	1.83486	0.00055	1	-0.356723	0.174624
0.239769	0.151113	sensory perception	53	GO:0003008	system process	5	GO:0007600	3.92157	0.00056	4	0.314749	0.225188
-0.354907	0.212371	translational elongation	14	GO:0009059	macromolecule biosynthetic process	50	GO:0006414	1.75439	0.00056	1	-0.356723	0.174624
0.0772386	-0.0822577	telomere organization	25	GO:0007010	cytoskeleton organization	1	GO:0032200	2.12766	0.00056	2	0.0154734	-0.10849
0.0933502	-0.069244	filopodium assembly	16	GO:0120036	plasma membrane bounded cell projection organization	28	GO:0046847	5.06329	0.00057	2	0.0154734	-0.10849
0.0746891	-0.306349	post-Golgi vesicle-mediated transport	18	GO:0016192	vesicle-mediated transport	13	GO:0006892	3.66972	0.00057	3	0.060492	-0.328451
-0.0244818	-0.204963	positive regulation of defense response	34	GO:0048583	regulation of response to stimulus	0	GO:0031349	1.20482	0.00057	2	0.0154734	-0.10849
0.0459761	-0.0465351	entry into host	63	GO:0044419	biological process involved in interspecies interaction between organisms	0	GO:0044409	3.79747	0.00058	2	0.0154734	-0.10849
0.00379593	-0.378485	regulation of transmembrane transport	15	GO:0051179	localization	0	GO:0034762	1.88679	0.00058	3	0.060492	-0.328451
-0.321556	0.112315	positive regulation of protein deacetylation	6	GO:0036211	protein modification process	10	GO:0090312	4.91803	0.00058	1	-0.356723	0.174624
0.0303948	-0.0337568	muscle cell proliferation	52	GO:0042127	regulation of cell population proliferation	1	GO:0033002	2.92683	0.00059	2	0.0154734	-0.10849
-0.317815	0.113749	post-transcriptional gene silencing by RNA	21	GO:0010468	regulation of gene expression	4	GO:0035194	2.29008	0.0006	1	-0.356723	0.174624
-0.38215	0.167549	regulation of translational initiation	14	GO:0009059	macromolecule biosynthetic process	26	GO:0006446	1.04167	0.0006	1	-0.356723	0.174624
0.396192	0.294898	T cell differentiation	78	GO:0045321	leukocyte activation	53	GO:0030217	3.27869	0.00061	4	0.314749	0.225188
0.41548	0.240595	dendritic spine morphogenesis	16	GO:0120036	plasma membrane bounded cell projection organization	26	GO:0060997	4.28571	0.00061	2	0.0154734	-0.10849
-0.31825	0.131102	regulation of transcription by RNA polymerase I	14	GO:0009059	macromolecule biosynthetic process	3	GO:0006356	6.81818	0.00061	1	-0.356723	0.174624
3.44965e-05	-0.0729464	lipid homeostasis	40	GO:0065008	regulation of biological quality	58	GO:0055088	2.40964	0.00062	2	0.0154734	-0.10849
0.0301846	-0.0659347	chromosome separation	72	GO:0007059	chromosome segregation	4	GO:0051304	3	0.00064	2	0.0154734	-0.10849
0.0263243	-0.35622	regulation of lipid localization	36	GO:0008104	protein localization	0	GO:1905952	2.29885	0.00065	3	0.060492	-0.328451
-0.315191	0.186194	mRNA transcription	42	GO:0016071	mRNA metabolic process	6	GO:0009299	1.75439	0.00066	1	-0.356723	0.174624
0.06705	-0.223941	response to lipopolysaccharide	63	GO:0044419	biological process involved in interspecies interaction between organisms	133	GO:0032496	1.67598	0.00066	2	0.0154734	-0.10849
0.00363789	-0.386005	positive regulation of establishment of protein localization	36	GO:0008104	protein localization	7	GO:1904951	2.29508	0.00066	3	0.060492	-0.328451
0.0620899	-0.333234	protein localization to endoplasmic reticulum	36	GO:0008104	protein localization	7	GO:0070972	4.05405	0.00066	3	0.060492	-0.328451
0.424455	0.326386	epithelial tube morphogenesis	29	GO:0009888	tissue development	1	GO:0060562	1.69972	0.00067	4	0.314749	0.225188
-0.0151308	-0.0760017	positive regulation of binding	27	GO:0065009	regulation of molecular function	8	GO:0051099	3.41463	0.00068	2	0.0154734	-0.10849
0.20238	0.116323	adult behavior	81	GO:0007626	locomotory behavior	45	GO:0030534	4.28571	0.00068	2	0.0154734	-0.10849
0.00820085	-0.176637	positive regulation of immune response	45	GO:0002376	immune system process	17	GO:0050778	1.55642	0.00068	4	0.314749	0.225188
0.0560841	-0.170516	response to starvation	7	GO:0009605	response to external stimulus	21	GO:0042594	1.86916	0.00069	2	0.0154734	-0.10849
-0.312439	0.188611	carboxylic acid biosynthetic process	68	GO:0055086	nucleobase-containing small molecule metabolic process	0	GO:0046394	3	0.00071	1	-0.356723	0.174624
-0.312963	0.188904	organic acid biosynthetic process	68	GO:0055086	nucleobase-containing small molecule metabolic process	0	GO:0016053	3	0.00071	1	-0.356723	0.174624
-0.0586523	-0.0981604	negative regulation of cell cycle phase transition	24	GO:0022402	cell cycle process	2	GO:1901988	1.18577	0.00072	2	0.0154734	-0.10849
-0.308974	0.197015	lipid catabolic process	85	GO:0044255	cellular lipid metabolic process	117	GO:0016042	1.83486	0.00072	2	0.0154734	-0.10849
-0.00324714	-0.245979	transforming growth factor beta receptor signaling pathway	2	GO:0070887	cellular response to chemical stimulus	135	GO:0007179	0	0.00073	2	0.0154734	-0.10849
0.0305675	-0.114831	regulation of protein-containing complex disassembly	44	GO:0065003	protein-containing complex assembly	1	GO:0043244	2.7933	0.00073	2	0.0154734	-0.10849
-0.271412	0.177734	glucose metabolic process	87	GO:0005996	monosaccharide metabolic process	87	GO:0006006	1.5625	0.00074	1	-0.356723	0.174624
-0.0577598	-0.09674	negative regulation of mitotic cell cycle	24	GO:0022402	cell cycle process	38	GO:0045930	1.43541	0.00074	2	0.0154734	-0.10849
-0.322967	0.192495	histone phosphorylation	6	GO:0036211	protein modification process	17	GO:0016572	4.28571	0.00074	1	-0.356723	0.174624
0.344392	0.253707	blastocyst development	43	GO:0009790	embryo development	35	GO:0001824	5.40541	0.00076	4	0.314749	0.225188
-0.0559805	-0.0884168	positive regulation of cell adhesion	59	GO:0007155	cell adhesion	72	GO:0045785	2.71084	0.00077	2	0.0154734	-0.10849
0.000190655	-0.24771	insulin receptor signaling pathway	2	GO:0070887	cellular response to chemical stimulus	80	GO:0008286	3.48259	0.00077	2	0.0154734	-0.10849
0.0801699	-0.0831703	vesicle organization	25	GO:0007010	cytoskeleton organization	14	GO:0016050	3.68852	0.00077	2	0.0154734	-0.10849
-0.310642	0.183914	transcription by RNA polymerase I	14	GO:0009059	macromolecule biosynthetic process	8	GO:0006360	4.61538	0.00077	1	-0.356723	0.174624
0.0781942	-0.0796704	nucleus organization	25	GO:0007010	cytoskeleton organization	29	GO:0006997	3.19149	0.00077	2	0.0154734	-0.10849
-0.424289	0.165077	regulation of mRNA stability	17	GO:1901575	organic substance catabolic process	46	GO:0043488	1.49254	0.00077	1	-0.356723	0.174624
0.0388874	-0.158538	cellular response to ionizing radiation	64	GO:0009628	response to abiotic stimulus	46	GO:0071479	10.5263	0.00081	2	0.0154734	-0.10849
0.0612114	-0.352943	inorganic cation transmembrane transport	15	GO:0051179	localization	21	GO:0098662	1.55642	0.00081	3	0.060492	-0.328451
-0.360692	0.213297	protein ubiquitination	6	GO:0036211	protein modification process	416	GO:0016567	1.67598	0.00081	1	-0.356723	0.174624
0.0666782	-0.0117643	T cell activation	78	GO:0045321	leukocyte activation	58	GO:0042110	2.99003	0.00082	4	0.314749	0.225188
0.0805795	-0.112958	spindle organization	51	GO:0007017	microtubule-based process	22	GO:0007051	2.48756	0.00082	2	0.0154734	-0.10849
0.405851	0.32123	cardiac muscle cell differentiation	57	GO:0072359	circulatory system development	51	GO:0055007	3.81679	0.00083	4	0.314749	0.225188
-0.28561	0.182315	carbohydrate catabolic process	87	GO:0005996	monosaccharide metabolic process	2	GO:0016052	1.69492	0.00085	1	-0.356723	0.174624
-0.302876	0.183051	monocarboxylic acid biosynthetic process	68	GO:0055086	nucleobase-containing small molecule metabolic process	0	GO:0072330	2.53165	0.00087	1	-0.356723	0.174624
0.387487	0.302525	vasculogenesis	57	GO:0072359	circulatory system development	79	GO:0001570	3.26087	0.00087	4	0.314749	0.225188
0.0798569	-0.088358	cytoplasmic microtubule organization	51	GO:0007017	microtubule-based process	57	GO:0031122	4.05405	0.00089	2	0.0154734	-0.10849
0.0810654	-0.0754684	postsynapse organization	62	GO:0034330	cell junction organization	17	GO:0099173	2.60417	0.0009	2	0.0154734	-0.10849
0.371037	0.284173	central nervous system neuron development	9	GO:0030182	neuron differentiation	24	GO:0021954	3.79747	0.00091	4	0.314749	0.225188
0.207706	0.130898	cellular process involved in reproduction in multicellular organism	46	GO:0000003	reproduction	0	GO:0022412	1.40187	0.00091	4	0.314749	0.225188
-0.337287	0.136136	production of miRNAs involved in gene silencing by miRNA	13	GO:0048523	negative regulation of cellular process	24	GO:0035196	3.44828	0.00091	1	-0.356723	0.174624
-0.33462	0.134374	primary sncRNA processing	13	GO:0048523	negative regulation of cellular process	0	GO:0070918	3.44828	0.00091	1	-0.356723	0.174624
-0.389246	0.164846	regulation of proteolysis involved in cellular protein catabolic process	17	GO:1901575	organic substance catabolic process	0	GO:1903050	0.917431	0.00091	1	-0.356723	0.174624
-0.0224173	-0.0794683	negative regulation of catalytic activity	27	GO:0065009	regulation of molecular function	25	GO:0043086	2.47191	0.00092	2	0.0154734	-0.10849
-0.0265511	-0.0726881	regulation of cell activation	78	GO:0045321	leukocyte activation	1	GO:0050865	2.90323	0.00092	4	0.314749	0.225188
-0.154714	0.279798	positive regulation of cytokine production	21	GO:0010468	regulation of gene expression	88	GO:0001819	1.8797	0.00092	1	-0.356723	0.174624
0.0353985	-0.127658	regulation of actin filament bundle assembly	26	GO:0051128	regulation of cellular component organization	2	GO:0032231	2.48447	0.00092	2	0.0154734	-0.10849
0.00698379	-0.0547851	regulation of leukocyte activation	78	GO:0045321	leukocyte activation	0	GO:0002694	2.8169	0.00092	4	0.314749	0.225188
0.363075	0.26788	morphogenesis of a branching structure	41	GO:0009653	anatomical structure morphogenesis	13	GO:0001763	1.91083	0.00092	4	0.314749	0.225188
-0.00672386	-0.235997	regulation of cellular response to growth factor stimulus	2	GO:0070887	cellular response to chemical stimulus	1	GO:0090287	0.440529	0.00093	2	0.0154734	-0.10849
0.0785611	-0.345418	organic acid transport	15	GO:0051179	localization	0	GO:0015849	2.45902	0.00093	3	0.060492	-0.328451
-0.0204061	-0.0807691	regulation of epithelial cell apoptotic process	47	GO:0008219	cell death	0	GO:1904035	2.40964	0.00098	2	0.0154734	-0.10849
0.0786261	-0.354448	mRNA transport	15	GO:0051179	localization	91	GO:0051028	2.39234	0.00099	3	0.060492	-0.328451
0.395227	0.299446	hindbrain development	9	GO:0030182	neuron differentiation	24	GO:0030902	1.27389	0.00099	4	0.314749	0.225188
0.0796005	-0.112171	mitotic spindle organization	24	GO:0022402	cell cycle process	55	GO:0007052	2.02703	0.00101	2	0.0154734	-0.10849
-0.0135525	-0.0740688	activation of GTPase activity	27	GO:0065009	regulation of molecular function	117	GO:0090630	2.29008	0.00101	2	0.0154734	-0.10849
0.0376677	-0.123829	regulation of microtubule depolymerization	51	GO:0007017	microtubule-based process	3	GO:0031114	3.07692	0.00101	2	0.0154734	-0.10849
-0.012867	-0.353584	positive regulation of cation transmembrane transport	15	GO:0051179	localization	1	GO:1904064	3.79747	0.00101	3	0.060492	-0.328451
-0.372636	0.223419	purine-containing compound biosynthetic process	55	GO:0043603	cellular amide metabolic process	0	GO:0072522	4.58716	0.00101	1	-0.356723	0.174624
-0.00668662	-0.0712781	regulation of cytosolic calcium ion concentration	40	GO:0065008	regulation of biological quality	57	GO:0051480	1.91083	0.00102	2	0.0154734	-0.10849
-0.0157303	-0.21917	regulation of Ras protein signal transduction	35	GO:0035556	intracellular signal transduction	9	GO:0046578	2.08333	0.00102	2	0.0154734	-0.10849
0.0796247	-0.0829616	ribonucleoprotein complex assembly	44	GO:0065003	protein-containing complex assembly	6	GO:0022618	2.45902	0.00103	2	0.0154734	-0.10849
-0.349162	0.210875	nucleoside triphosphate metabolic process	10	GO:0006793	phosphorus metabolic process	0	GO:0009141	4.61538	0.00103	1	-0.356723	0.174624
-0.354284	0.124378	positive regulation of histone modification	6	GO:0036211	protein modification process	1	GO:0031058	3.19149	0.00104	1	-0.356723	0.174624
-0.326387	0.120155	regulation of autophagy	77	GO:0061919	process utilizing autophagic mechanism	80	GO:0010506	1.05634	0.00105	1	-0.356723	0.174624
0.335871	0.251035	skeletal muscle organ development	67	GO:0061061	muscle structure development	8	GO:0060538	1.48148	0.00105	4	0.314749	0.225188
0.43864	0.34021	neural tube formation	56	GO:0035295	tube development	18	GO:0001841	1.76471	0.00106	4	0.314749	0.225188
-0.00778297	-0.064194	regulation of circadian rhythm	80	GO:0048511	rhythmic process	84	GO:0042752	0	0.00106	2	0.0154734	-0.10849
-0.0146853	-0.19428	adenylate cyclase-modulating G protein-coupled receptor signaling pathway	32	GO:0007165	signal transduction	63	GO:0007188	3.61446	0.00107	2	0.0154734	-0.10849
0.0470945	-0.105051	regulation of filopodium assembly	16	GO:0120036	plasma membrane bounded cell projection organization	22	GO:0051489	6.15385	0.00107	2	0.0154734	-0.10849
0.0527324	-0.173649	inflammatory response	11	GO:0006950	response to stress	431	GO:0006954	0.892857	0.00107	2	0.0154734	-0.10849
0.404552	0.308868	embryonic skeletal system morphogenesis	28	GO:0048513	animal organ development	78	GO:0048704	2.29885	0.00107	4	0.314749	0.225188
-0.0493727	-0.209901	negative regulation of canonical Wnt signaling pathway	54	GO:0007267	cell-cell signaling	198	GO:0090090	2.85714	0.00108	2	0.0154734	-0.10849
-0.286416	0.149855	telomere maintenance	25	GO:0007010	cytoskeleton organization	74	GO:0000723	2.18579	0.00109	2	0.0154734	-0.10849
0.0595847	-0.185156	response to xenobiotic stimulus	2	GO:0070887	cellular response to chemical stimulus	155	GO:0009410	2.85714	0.0011	2	0.0154734	-0.10849
0.0811724	-0.0798953	cell-cell junction assembly	62	GO:0034330	cell junction organization	32	GO:0007043	1.48148	0.0011	2	0.0154734	-0.10849
-0.0121577	-0.0669649	regulation of mesenchymal cell proliferation	52	GO:0042127	regulation of cell population proliferation	1	GO:0010464	2.08333	0.0011	2	0.0154734	-0.10849
-0.315926	0.113023	miRNA-mediated gene silencing	21	GO:0010468	regulation of gene expression	94	GO:0035195	2.3622	0.00111	1	-0.356723	0.174624
0.0541485	-0.408933	signal release	15	GO:0051179	localization	2	GO:0023061	0	0.00111	3	0.060492	-0.328451
0.379193	0.285085	urogenital system development	28	GO:0048513	animal organ development	20	GO:0001655	2.86738	0.00112	4	0.314749	0.225188
-0.349613	0.211269	nucleoside diphosphate phosphorylation	10	GO:0006793	phosphorus metabolic process	18	GO:0006165	2	0.00112	1	-0.356723	0.174624
0.0606365	-0.190938	response to tumor necrosis factor	2	GO:0070887	cellular response to chemical stimulus	27	GO:0034612	0.675676	0.00113	2	0.0154734	-0.10849
0.389508	0.29473	artery morphogenesis	57	GO:0072359	circulatory system development	31	GO:0048844	3.84615	0.00113	4	0.314749	0.225188
0.0312841	-0.113513	regulation of protein depolymerization	44	GO:0065003	protein-containing complex assembly	1	GO:1901879	3.26797	0.00113	2	0.0154734	-0.10849
-0.0160248	-0.206594	second-messenger-mediated signaling	35	GO:0035556	intracellular signal transduction	2	GO:0019932	2.48447	0.00114	2	0.0154734	-0.10849
-0.390549	0.164952	regulation of cellular protein catabolic process	17	GO:1901575	organic substance catabolic process	1	GO:1903362	0.833333	0.00114	1	-0.356723	0.174624
-0.319323	0.112714	positive regulation of histone deacetylation	6	GO:0036211	protein modification process	22	GO:0031065	3.50877	0.00114	1	-0.356723	0.174624
0.304858	0.224831	regulation of embryonic development	30	GO:0051239	regulation of multicellular organismal process	44	GO:0045995	3.66972	0.00116	4	0.314749	0.225188
0.033659	-0.121994	regulation of actomyosin structure organization	58	GO:0030029	actin filament-based process	0	GO:0110020	3.37838	0.00116	2	0.0154734	-0.10849
0.0148116	-0.0465571	regulation of reproductive process	46	GO:0000003	reproduction	0	GO:2000241	0.952381	0.00117	4	0.314749	0.225188
0.0975064	-0.0771374	cilium organization	16	GO:0120036	plasma membrane bounded cell projection organization	34	GO:0044782	3.19149	0.00119	2	0.0154734	-0.10849
0.383005	0.287504	gastrulation	43	GO:0009790	embryo development	40	GO:0007369	2.40964	0.00119	4	0.314749	0.225188
0.109305	-0.381121	establishment of spindle localization	5	GO:0070727	cellular macromolecule localization	7	GO:0051293	2.85714	0.0012	3	0.060492	-0.328451
0.0784143	-0.0794234	protein depolymerization	44	GO:0065003	protein-containing complex assembly	1	GO:0051261	3.82514	0.00121	2	0.0154734	-0.10849
0.00168182	-0.23308	regulation of cellular response to insulin stimulus	2	GO:0070887	cellular response to chemical stimulus	6	GO:1900076	2.65487	0.00121	2	0.0154734	-0.10849
0.078063	-0.334765	phagocytosis	18	GO:0016192	vesicle-mediated transport	105	GO:0006909	3.125	0.00124	3	0.060492	-0.328451
0.0249643	-0.0482524	epithelial cell apoptotic process	47	GO:0008219	cell death	2	GO:1904019	3.53982	0.00126	2	0.0154734	-0.10849
-0.00741031	-0.0782856	ion homeostasis	40	GO:0065008	regulation of biological quality	24	GO:0050801	2.00573	0.00126	2	0.0154734	-0.10849
0.362557	0.26958	respiratory system development	28	GO:0048513	animal organ development	11	GO:0060541	2.55102	0.00129	4	0.314749	0.225188
-0.0550345	-0.0970291	negative regulation of mitotic cell cycle phase transition	24	GO:0022402	cell cycle process	4	GO:1901991	1.24224	0.00129	2	0.0154734	-0.10849
0.16946	-0.179266	regulation of blood vessel endothelial cell migration	79	GO:0090130	tissue migration	7	GO:0043535	2	0.00129	3	0.060492	-0.328451
0.25759	0.192477	regulation of fat cell differentiation	22	GO:0048468	cell development	24	GO:0045598	3.57143	0.00129	4	0.314749	0.225188
0.369982	0.27556	tube closure	56	GO:0035295	tube development	1	GO:0060606	2.08333	0.0013	4	0.314749	0.225188
0.434966	0.336825	neural tube closure	56	GO:0035295	tube development	113	GO:0001843	2.08333	0.0013	4	0.314749	0.225188
0.403846	0.307466	telencephalon development	61	GO:0007420	brain development	26	GO:0021537	1.49254	0.00131	4	0.314749	0.225188
-0.32679	0.193526	peptidyl-lysine methylation	6	GO:0036211	protein modification process	17	GO:0018022	3.82166	0.00132	1	-0.356723	0.174624
-0.325822	0.193089	histone lysine methylation	6	GO:0036211	protein modification process	20	GO:0034968	3.82166	0.00132	1	-0.356723	0.174624
-0.29238	0.172427	cellular lipid catabolic process	85	GO:0044255	cellular lipid metabolic process	6	GO:0044242	2.85714	0.00132	2	0.0154734	-0.10849
0.0414453	-0.032294	viral genome replication	73	GO:0016032	viral process	4	GO:0019079	3.18471	0.00133	2	0.0154734	-0.10849
0.061596	-0.19708	response to carbohydrate	2	GO:0070887	cellular response to chemical stimulus	4	GO:0009743	0.636943	0.00135	2	0.0154734	-0.10849
-0.0149929	-0.204606	I-kappaB kinase/NF-kappaB signaling	35	GO:0035556	intracellular signal transduction	60	GO:0007249	2.23464	0.00136	2	0.0154734	-0.10849
0.053247	-0.167731	response to wounding	11	GO:0006950	response to stress	101	GO:0009611	2.64706	0.00136	2	0.0154734	-0.10849
0.367971	0.268378	T cell differentiation in thymus	78	GO:0045321	leukocyte activation	48	GO:0033077	5.40541	0.00137	4	0.314749	0.225188
0.297259	0.209306	regulation of cell shape	41	GO:0009653	anatomical structure morphogenesis	181	GO:0008360	1.46341	0.00138	4	0.314749	0.225188
0.0781726	-0.0739023	extracellular structure organization	62	GO:0034330	cell junction organization	0	GO:0043062	4.16667	0.00138	2	0.0154734	-0.10849
0.0781726	-0.0739023	external encapsulating structure organization	62	GO:0034330	cell junction organization	0	GO:0045229	4.16667	0.00138	2	0.0154734	-0.10849
0.0783357	-0.0741228	extracellular matrix organization	62	GO:0034330	cell junction organization	211	GO:0030198	4.16667	0.00138	2	0.0154734	-0.10849
0.0461512	-0.198808	cellular response to decreased oxygen levels	64	GO:0009628	response to abiotic stimulus	25	GO:0036294	1	0.0014	2	0.0154734	-0.10849
0.0306273	-0.0658875	mitotic cytokinesis	50	GO:0051301	cell division	61	GO:0000281	4.81928	0.00141	2	0.0154734	-0.10849
0.364361	0.27597	regulation of cardiac muscle tissue growth	49	GO:0040007	growth	0	GO:0055021	4.05405	0.00141	4	0.314749	0.225188
0.000351805	-0.369682	positive regulation of ion transport	15	GO:0051179	localization	9	GO:0043270	2.7933	0.00143	3	0.060492	-0.328451
0.046222	-0.0497891	viral entry into host cell	63	GO:0044419	biological process involved in interspecies interaction between organisms	46	GO:0046718	4.05405	0.00143	2	0.0154734	-0.10849
0.079155	-0.352271	anion transport	15	GO:0051179	localization	31	GO:0006820	2.7933	0.00143	3	0.060492	-0.328451
0.0296396	-0.0344325	establishment or maintenance of epithelial cell apical/basal polarity	69	GO:0007163	establishment or maintenance of cell polarity	26	GO:0045197	1.92308	0.00144	2	0.0154734	-0.10849
-0.331619	0.196066	protein polyubiquitination	6	GO:0036211	protein modification process	229	GO:0000209	1.46341	0.00144	1	-0.356723	0.174624
0.21725	0.179943	negative regulation of developmental growth	49	GO:0040007	growth	1	GO:0048640	1	0.00144	4	0.314749	0.225188
0.00729607	-0.125004	positive regulation of chromosome organization	26	GO:0051128	regulation of cellular component organization	2	GO:2001252	1.86335	0.00145	2	0.0154734	-0.10849
0.0143238	-0.377133	regulation of protein localization to cell periphery	36	GO:0008104	protein localization	1	GO:1904375	0.653595	0.00145	3	0.060492	-0.328451
-0.0483752	-0.0941181	negative regulation of G1/S transition of mitotic cell cycle	24	GO:0022402	cell cycle process	52	GO:2000134	3.50877	0.00146	2	0.0154734	-0.10849
-0.00559912	-0.35716	positive regulation of protein localization to cell periphery	36	GO:0008104	protein localization	0	GO:1904377	1.20482	0.00146	3	0.060492	-0.328451
0.35551	0.266123	neuroblast proliferation	52	GO:0042127	regulation of cell population proliferation	21	GO:0007405	2.85714	0.00146	2	0.0154734	-0.10849
0.339178	0.247789	hepaticobiliary system development	88	GO:0061008	hepaticobiliary system development	0	GO:0061008	3.66972	0.00147	4	0.314749	0.225188
-0.00249686	-0.107478	negative regulation of protein depolymerization	44	GO:0065003	protein-containing complex assembly	0	GO:1901880	3.7037	0.00148	2	0.0154734	-0.10849
-0.31025	0.197988	lipid metabolic process	85	GO:0044255	cellular lipid metabolic process	732	GO:0006629	1.875	0.00148	2	0.0154734	-0.10849
0.0322607	-0.384672	regulation of protein import	15	GO:0051179	localization	0	GO:1904589	0.847458	0.00148	3	0.060492	-0.328451
0.383652	0.289306	skeletal system development	28	GO:0048513	animal organ development	137	GO:0001501	2.29226	0.0015	4	0.314749	0.225188
0.0605706	-0.330767	potassium ion transmembrane transport	15	GO:0051179	localization	164	GO:0071805	2.17391	0.0015	3	0.060492	-0.328451
0.0605882	-0.193905	response to inorganic substance	2	GO:0070887	cellular response to chemical stimulus	23	GO:0010035	2.63158	0.0015	2	0.0154734	-0.10849
0.0340401	-0.123516	regulation of microtubule polymerization or depolymerization	51	GO:0007017	microtubule-based process	20	GO:0031110	3.7037	0.00151	2	0.0154734	-0.10849
-0.0494589	-0.0938967	negative regulation of cell cycle G1/S phase transition	24	GO:0022402	cell cycle process	13	GO:1902807	3.07692	0.00151	2	0.0154734	-0.10849
-0.384147	0.162857	regulation of proteasomal protein catabolic process	17	GO:1901575	organic substance catabolic process	24	GO:0061136	1.14943	0.00155	1	-0.356723	0.174624
-0.00208584	-0.239494	hormone-mediated signaling pathway	48	GO:0009719	response to endogenous stimulus	48	GO:0009755	3.92157	0.00156	2	0.0154734	-0.10849
-0.374828	0.224339	translational initiation	14	GO:0009059	macromolecule biosynthetic process	80	GO:0006413	0.694444	0.00156	1	-0.356723	0.174624
0.0812241	-0.0892598	microtubule polymerization or depolymerization	51	GO:0007017	microtubule-based process	2	GO:0031109	3.47222	0.00156	2	0.0154734	-0.10849
0.273593	0.208112	regulation of muscle cell differentiation	67	GO:0061061	muscle structure development	8	GO:0051147	1.48148	0.00159	4	0.314749	0.225188
-0.319986	0.0565939	double-strand break repair via homologous recombination	60	GO:0006259	DNA metabolic process	129	GO:0000724	3.47222	0.00162	1	-0.356723	0.174624
-0.320546	0.0567789	recombinational repair	60	GO:0006259	DNA metabolic process	4	GO:0000725	3.47222	0.00162	1	-0.356723	0.174624
-0.00703288	-0.0781332	cation homeostasis	40	GO:0065008	regulation of biological quality	2	GO:0055080	1.76471	0.00162	2	0.0154734	-0.10849
0.0610715	-0.353168	inorganic ion transmembrane transport	15	GO:0051179	localization	0	GO:0098660	1.50376	0.00162	3	0.060492	-0.328451
-0.0185458	-0.0746779	regulation of chromosome segregation	72	GO:0007059	chromosome segregation	11	GO:0051983	3	0.00163	2	0.0154734	-0.10849
0.380538	0.285332	tube formation	56	GO:0035295	tube development	13	GO:0035148	1.43541	0.00163	4	0.314749	0.225188
-0.0110469	-0.37166	positive regulation of intracellular transport	15	GO:0051179	localization	6	GO:0032388	1.94553	0.00166	3	0.060492	-0.328451
-0.348353	0.207891	organophosphate biosynthetic process	10	GO:0006793	phosphorus metabolic process	0	GO:0090407	3.0303	0.00167	1	-0.356723	0.174624
-0.0196768	-0.346136	positive regulation of cation channel activity	27	GO:0065009	regulation of molecular function	18	GO:2001259	4.54545	0.00169	2	0.0154734	-0.10849
-0.339094	0.111905	negative regulation of cellular catabolic process	17	GO:1901575	organic substance catabolic process	0	GO:0031330	1.09091	0.0017	1	-0.356723	0.174624
0.272815	0.185698	somatic stem cell population maintenance	74	GO:0098727	maintenance of cell number	47	GO:0035019	4.16667	0.00172	4	0.314749	0.225188
-0.307197	0.18682	fatty acid biosynthetic process	68	GO:0055086	nucleobase-containing small molecule metabolic process	85	GO:0006633	2.7027	0.00172	1	-0.356723	0.174624
0.0799516	-0.078116	bicellular tight junction assembly	62	GO:0034330	cell junction organization	70	GO:0070830	1.92308	0.00172	2	0.0154734	-0.10849
-0.324238	0.206956	lipid biosynthetic process	85	GO:0044255	cellular lipid metabolic process	24	GO:0008610	1.66667	0.00175	2	0.0154734	-0.10849
-0.017551	0.166276	cold-induced thermogenesis	89	GO:0120161	regulation of cold-induced thermogenesis	2	GO:0106106	5.9322	0.00176	2	0.0154734	-0.10849
-0.0643281	0.208759	regulation of cold-induced thermogenesis	89	GO:0120161	regulation of cold-induced thermogenesis	2	GO:0120161	5.9322	0.00176	2	0.0154734	-0.10849
0.30737	0.230115	fat cell differentiation	22	GO:0048468	cell development	107	GO:0045444	3.34928	0.0018	4	0.314749	0.225188
-0.32749	0.0117195	regulation of double-strand break repair	60	GO:0006259	DNA metabolic process	8	GO:2000779	2.65487	0.00181	1	-0.356723	0.174624
0.046192	-0.199794	cellular response to oxygen levels	64	GO:0009628	response to abiotic stimulus	5	GO:0071453	1.69492	0.00182	2	0.0154734	-0.10849
0.00539003	-0.117782	negative regulation of microtubule depolymerization	51	GO:0007017	microtubule-based process	43	GO:0007026	3.27869	0.00182	2	0.0154734	-0.10849
0.436816	0.338945	heart morphogenesis	41	GO:0009653	anatomical structure morphogenesis	82	GO:0003007	2.54237	0.00184	4	0.314749	0.225188
0.0626052	-0.33136	synaptic vesicle endocytosis	18	GO:0016192	vesicle-mediated transport	76	GO:0048488	5.06329	0.00185	3	0.060492	-0.328451
0.0625883	-0.331244	presynaptic endocytosis	18	GO:0016192	vesicle-mediated transport	0	GO:0140238	5.06329	0.00185	3	0.060492	-0.328451
-0.34223	0.206792	ribonucleoside triphosphate metabolic process	10	GO:0006793	phosphorus metabolic process	0	GO:0009199	3.27869	0.00185	1	-0.356723	0.174624
-0.34149	0.206374	purine nucleoside triphosphate metabolic process	10	GO:0006793	phosphorus metabolic process	0	GO:0009144	3.27869	0.00185	1	-0.356723	0.174624
-0.331187	0.196437	peptidyl-lysine acetylation	6	GO:0036211	protein modification process	7	GO:0018394	2.55102	0.00186	1	-0.356723	0.174624
0.0200877	-0.398349	regulation of protein import into nucleus	15	GO:0051179	localization	9	GO:0042306	1	0.00188	3	0.060492	-0.328451
0.0612789	-0.195101	response to alcohol	2	GO:0070887	cellular response to chemical stimulus	1	GO:0097305	0	0.00191	2	0.0154734	-0.10849
-0.00739672	-0.188159	Rac protein signal transduction	35	GO:0035556	intracellular signal transduction	27	GO:0016601	1.92308	0.00192	2	0.0154734	-0.10849
-0.296168	0.178907	fatty acid metabolic process	68	GO:0055086	nucleobase-containing small molecule metabolic process	212	GO:0006631	2.77778	0.00193	1	-0.356723	0.174624
0.377933	0.283401	limbic system development	61	GO:0007420	brain development	2	GO:0021761	1.26582	0.00194	4	0.314749	0.225188
0.22069	0.133334	muscle contraction	53	GO:0003008	system process	61	GO:0006936	2.54777	0.00194	4	0.314749	0.225188
-0.00887006	-0.346557	positive regulation of transporter activity	27	GO:0065009	regulation of molecular function	5	GO:0032411	3.61446	0.00194	2	0.0154734	-0.10849
0.0025552	-0.11505	negative regulation of microtubule polymerization or depolymerization	51	GO:0007017	microtubule-based process	1	GO:0031111	4.05405	0.00195	2	0.0154734	-0.10849
0.0303236	-0.330538	hormone transport	40	GO:0065008	regulation of biological quality	2	GO:0009914	0	0.00196	2	0.0154734	-0.10849
0.0218628	-0.383097	hormone secretion	40	GO:0065008	regulation of biological quality	10	GO:0046879	0	0.00196	2	0.0154734	-0.10849
0.00504759	-0.401595	positive regulation of protein transport	36	GO:0008104	protein localization	6	GO:0051222	2.11268	0.00196	3	0.060492	-0.328451
-0.0173226	-0.225571	regulation of intrinsic apoptotic signaling pathway	47	GO:0008219	cell death	7	GO:2001242	4.21687	0.00196	2	0.0154734	-0.10849
-0.00557619	-0.0752332	regulation of membrane potential	40	GO:0065008	regulation of biological quality	162	GO:0042391	1.46341	0.00198	2	0.0154734	-0.10849
0.078983	-0.0806548	Golgi organization	65	GO:0010256	endomembrane system organization	130	GO:0007030	2.12766	0.00198	2	0.0154734	-0.10849
0.078754	-0.0751776	plasma membrane organization	65	GO:0010256	endomembrane system organization	28	GO:0007009	5.34351	0.00199	2	0.0154734	-0.10849
0.0254379	-0.0381227	cell-matrix adhesion	59	GO:0007155	cell adhesion	135	GO:0007160	1.02041	0.00199	2	0.0154734	-0.10849
0.00729326	-0.131511	positive regulation of cytoskeleton organization	26	GO:0051128	regulation of cellular component organization	5	GO:0051495	2.73973	0.00205	2	0.0154734	-0.10849
-0.0236636	-0.0733965	regulation of epithelial cell proliferation	52	GO:0042127	regulation of cell population proliferation	17	GO:0050678	2.04918	0.00206	2	0.0154734	-0.10849
0.411275	0.314392	skeletal system morphogenesis	28	GO:0048513	animal organ development	62	GO:0048705	2.23464	0.00206	4	0.314749	0.225188
0.333451	0.246006	regulation of myeloid leukocyte differentiation	45	GO:0002376	immune system process	1	GO:0002761	4	0.00207	4	0.314749	0.225188
-0.0157446	-0.0991527	regulation of chromosome separation	72	GO:0007059	chromosome segregation	3	GO:1905818	2.53165	0.00207	2	0.0154734	-0.10849
0.21168	-0.146463	blood vessel endothelial cell migration	79	GO:0090130	tissue migration	10	GO:0043534	2.29008	0.00208	3	0.060492	-0.328451
0.0458776	-0.21229	cellular response to transforming growth factor beta stimulus	2	GO:0070887	cellular response to chemical stimulus	58	GO:0071560	0	0.00209	2	0.0154734	-0.10849
-0.419846	0.256063	purine ribonucleotide biosynthetic process	71	GO:1901135	carbohydrate derivative metabolic process	2	GO:0009152	4.34783	0.00214	1	-0.356723	0.174624
-0.00725368	-0.0782335	inorganic ion homeostasis	40	GO:0065008	regulation of biological quality	0	GO:0098771	2.02899	0.00214	2	0.0154734	-0.10849
-0.337845	0.137189	regulation of alternative mRNA splicing, via spliceosome	42	GO:0016071	mRNA metabolic process	95	GO:0000381	3	0.00215	1	-0.356723	0.174624
-0.00481504	-0.384219	negative regulation of protein transport	36	GO:0008104	protein localization	6	GO:0051224	0	0.00216	3	0.060492	-0.328451
0.0814129	-0.0891659	microtubule organizing center organization	51	GO:0007017	microtubule-based process	13	GO:0031023	1.76991	0.00218	2	0.0154734	-0.10849
-0.382319	0.162144	regulation of ubiquitin-dependent protein catabolic process	17	GO:1901575	organic substance catabolic process	5	GO:2000058	1.0929	0.00218	1	-0.356723	0.174624
0.0352334	-0.0532251	erythrocyte homeostasis	40	GO:0065008	regulation of biological quality	14	GO:0034101	3.18471	0.00218	2	0.0154734	-0.10849
-0.2453	0.147195	pyruvate metabolic process	68	GO:0055086	nucleobase-containing small molecule metabolic process	14	GO:0006090	2.85714	0.00219	1	-0.356723	0.174624
-0.254259	0.148236	nucleotide phosphorylation	10	GO:0006793	phosphorus metabolic process	4	GO:0046939	1.90476	0.00219	1	-0.356723	0.174624
-0.327859	0.113779	positive regulation of RNA splicing	21	GO:0010468	regulation of gene expression	20	GO:0033120	1.14943	0.00223	1	-0.356723	0.174624
-0.0138387	-0.216221	JNK cascade	11	GO:0006950	response to stress	54	GO:0007254	0.60241	0.00225	2	0.0154734	-0.10849
-0.0148923	-0.215759	regulation of protein kinase B signaling	35	GO:0035556	intracellular signal transduction	22	GO:0051896	0.819672	0.00229	2	0.0154734	-0.10849
0.374621	0.275957	hematopoietic progenitor cell differentiation	45	GO:0002376	immune system process	112	GO:0002244	2.14286	0.00229	4	0.314749	0.225188
0.00538334	-0.382361	regulation of ion transmembrane transport	15	GO:0051179	localization	139	GO:0034765	1.7316	0.0023	3	0.060492	-0.328451
0.24024	0.170932	positive regulation of organ growth	49	GO:0040007	growth	18	GO:0046622	4.16667	0.0023	4	0.314749	0.225188
0.336267	0.251015	skin development	75	GO:0007423	sensory organ development	67	GO:0043588	4.16667	0.00232	4	0.314749	0.225188
-0.17993	0.11507	adaptive thermogenesis	89	GO:0120161	regulation of cold-induced thermogenesis	11	GO:1990845	5.7377	0.00237	2	0.0154734	-0.10849
-0.422355	0.154548	positive regulation of mRNA catabolic process	42	GO:0016071	mRNA metabolic process	18	GO:0061014	2.45902	0.00237	1	-0.356723	0.174624
-0.00159715	-0.0737539	homeostasis of number of cells	40	GO:0065008	regulation of biological quality	40	GO:0048872	2.96296	0.00239	2	0.0154734	-0.10849
0.176393	-0.186285	regulation of epithelial cell migration	79	GO:0090130	tissue migration	6	GO:0010632	1.95122	0.00241	3	0.060492	-0.328451
0.0142172	-0.373718	regulation of nucleocytoplasmic transport	15	GO:0051179	localization	8	GO:0046822	2.39234	0.00245	3	0.060492	-0.328451
0.199745	-0.0136522	production of molecular mediator involved in inflammatory response	11	GO:0006950	response to stress	11	GO:0002532	0	0.00246	2	0.0154734	-0.10849
0.0784675	-0.0830648	cortical cytoskeleton organization	25	GO:0007010	cytoskeleton organization	23	GO:0030865	5.06329	0.00247	2	0.0154734	-0.10849
-0.215467	0.121676	reactive oxygen species metabolic process	90	GO:0072593	reactive oxygen species metabolic process	45	GO:0072593	2.96296	0.00247	2	0.0154734	-0.10849
0.0648931	-0.372901	establishment of protein localization to membrane	5	GO:0070727	cellular macromolecule localization	9	GO:0090150	2.75229	0.0025	3	0.060492	-0.328451
0.0663189	-0.38469	protein targeting	15	GO:0051179	localization	47	GO:0006605	1.83486	0.0025	3	0.060492	-0.328451
-0.0302869	-0.235618	negative regulation of intracellular steroid hormone receptor signaling pathway	48	GO:0009719	response to endogenous stimulus	4	GO:0033144	6.25	0.00251	2	0.0154734	-0.10849
0.287974	0.228078	positive regulation of epithelial to mesenchymal transition	29	GO:0009888	tissue development	53	GO:0010718	0	0.00251	4	0.314749	0.225188
0.0801685	-0.078424	apical junction assembly	62	GO:0034330	cell junction organization	11	GO:0043297	2.7027	0.00252	2	0.0154734	-0.10849
-0.421685	0.256698	purine nucleotide biosynthetic process	55	GO:0043603	cellular amide metabolic process	26	GO:0006164	4.7619	0.00253	1	-0.356723	0.174624
-0.420785	0.259523	glycolytic process	10	GO:0006793	phosphorus metabolic process	61	GO:0006096	2.08333	0.00254	1	-0.356723	0.174624
-0.377764	0.230922	ATP generation from ADP	10	GO:0006793	phosphorus metabolic process	2	GO:0006757	2.08333	0.00254	1	-0.356723	0.174624
0.0348313	-0.0537067	myeloid cell homeostasis	40	GO:0065008	regulation of biological quality	13	GO:0002262	2.87356	0.00254	2	0.0154734	-0.10849
-0.0218019	-0.0725453	regulation of cell division	50	GO:0051301	cell division	32	GO:0051302	2.85714	0.00255	2	0.0154734	-0.10849
-0.198903	0.125892	ATP metabolic process	91	GO:0046034	ATP metabolic process	54	GO:0046034	1.91083	0.00256	2	0.0154734	-0.10849
-0.0179438	-0.0809176	regulation of transporter activity	27	GO:0065009	regulation of molecular function	4	GO:0032409	3.125	0.00257	2	0.0154734	-0.10849
-0.0168562	-0.210336	canonical Wnt signaling pathway	54	GO:0007267	cell-cell signaling	174	GO:0060070	1.81818	0.00259	2	0.0154734	-0.10849
-0.316221	0.0105256	regulation of double-strand break repair via homologous recombination	60	GO:0006259	DNA metabolic process	21	GO:0010569	2.7027	0.00259	1	-0.356723	0.174624
0.37228	0.286829	glial cell development	9	GO:0030182	neuron differentiation	6	GO:0021782	3.27869	0.00259	4	0.314749	0.225188
0.0734874	-0.296186	clathrin-dependent endocytosis	18	GO:0016192	vesicle-mediated transport	38	GO:0072583	5.40541	0.0026	3	0.060492	-0.328451
-0.016745	-0.232674	regulation of stress-activated protein kinase signaling cascade	11	GO:0006950	response to stress	1	GO:0070302	1.46341	0.0026	2	0.0154734	-0.10849
-0.0167871	-0.233599	regulation of stress-activated MAPK cascade	11	GO:0006950	response to stress	11	GO:0032872	1.46341	0.0026	2	0.0154734	-0.10849
0.288728	0.239208	negative regulation of leukocyte differentiation	45	GO:0002376	immune system process	0	GO:1902106	2.85714	0.00261	4	0.314749	0.225188
-0.343462	0.139553	regulation of histone methylation	6	GO:0036211	protein modification process	5	GO:0031060	3.93701	0.00263	1	-0.356723	0.174624
0.0461467	-0.0472054	biological process involved in symbiotic interaction	63	GO:0044419	biological process involved in interspecies interaction between organisms	0	GO:0044403	2.11864	0.00264	2	0.0154734	-0.10849
0.103136	-0.267141	granulocyte migration	19	GO:0048870	cell motility	3	GO:0097530	1.92308	0.00269	3	0.060492	-0.328451
0.403754	0.307295	epithelial tube formation	56	GO:0035295	tube development	0	GO:0072175	1.5625	0.00272	4	0.314749	0.225188
0.412438	0.315864	embryonic epithelial tube formation	56	GO:0035295	tube development	4	GO:0001838	1.5625	0.00272	4	0.314749	0.225188
0.0790407	-0.0729117	cell-substrate junction organization	62	GO:0034330	cell junction organization	1	GO:0150115	2.7027	0.00272	2	0.0154734	-0.10849
0.406015	0.0325298	neuron migration	19	GO:0048870	cell motility	177	GO:0001764	1.63934	0.00272	3	0.060492	-0.328451
-0.0146389	-0.347909	negative regulation of protein localization to nucleus	36	GO:0008104	protein localization	23	GO:1900181	0	0.00273	3	0.060492	-0.328451
-0.0295765	-0.147094	regulation of synaptic plasticity	54	GO:0007267	cell-cell signaling	64	GO:0048167	1.20482	0.00273	2	0.0154734	-0.10849
-0.401762	0.147447	negative regulation of protein modification process	23	GO:0032268	regulation of cellular protein metabolic process	0	GO:0031400	2.14133	0.00273	1	-0.356723	0.174624
0.0516244	-0.166101	response to oxidative stress	11	GO:0006950	response to stress	153	GO:0006979	0.892857	0.00273	2	0.0154734	-0.10849
0.436303	0.33805	primary neural tube formation	56	GO:0035295	tube development	0	GO:0014020	1.96078	0.00273	4	0.314749	0.225188
0.0326719	-0.133924	regulation of actin polymerization or depolymerization	58	GO:0030029	actin filament-based process	7	GO:0008064	2.45902	0.00274	2	0.0154734	-0.10849
0.032142	-0.132814	regulation of actin filament length	58	GO:0030029	actin filament-based process	6	GO:0030832	2.45902	0.00274	2	0.0154734	-0.10849
0.469695	0.0674295	axon guidance	38	GO:0040011	locomotion	259	GO:0007411	4.09836	0.00276	3	0.060492	-0.328451
0.469716	0.0669961	neuron projection guidance	38	GO:0040011	locomotion	8	GO:0097485	4.09836	0.00276	3	0.060492	-0.328451
-0.185268	-0.195846	mRNA export from nucleus	36	GO:0008104	protein localization	67	GO:0006406	3	0.00278	3	0.060492	-0.328451
0.0640125	-0.352355	establishment of protein localization to plasma membrane	5	GO:0070727	cellular macromolecule localization	5	GO:0061951	4.28571	0.00279	3	0.060492	-0.328451
0.224291	0.194074	negative regulation of muscle cell differentiation	67	GO:0061061	muscle structure development	10	GO:0051148	1.75439	0.0028	4	0.314749	0.225188
0.075607	-0.328223	protein localization to cell junction	36	GO:0008104	protein localization	12	GO:1902414	0.917431	0.00281	3	0.060492	-0.328451
0.388026	0.29217	embryonic placenta development	28	GO:0048513	animal organ development	32	GO:0001892	0.787402	0.00283	4	0.314749	0.225188
0.061821	-0.201966	response to transforming growth factor beta	2	GO:0070887	cellular response to chemical stimulus	9	GO:0071559	0	0.00285	2	0.0154734	-0.10849
0.00523063	-0.336089	positive regulation of lipid localization	36	GO:0008104	protein localization	0	GO:1905954	1.75439	0.00288	3	0.060492	-0.328451
-0.0218707	-0.351433	positive regulation of ion transmembrane transporter activity	27	GO:0065009	regulation of molecular function	6	GO:0032414	2.7027	0.00289	2	0.0154734	-0.10849
0.0615367	-0.196489	response to monosaccharide	2	GO:0070887	cellular response to chemical stimulus	1	GO:0034284	0.763359	0.00291	2	0.0154734	-0.10849
0.0615113	-0.196301	response to hexose	2	GO:0070887	cellular response to chemical stimulus	0	GO:0009746	0.763359	0.00291	2	0.0154734	-0.10849
0.0614881	-0.195998	response to glucose	2	GO:0070887	cellular response to chemical stimulus	57	GO:0009749	0.763359	0.00291	2	0.0154734	-0.10849
-0.403727	0.157363	positive regulation of translation	55	GO:0043603	cellular amide metabolic process	93	GO:0045727	1.83486	0.00292	1	-0.356723	0.174624
-0.288106	0.0882728	regulation of telomere maintenance	26	GO:0051128	regulation of cellular component organization	13	GO:0032204	2.08333	0.00294	2	0.0154734	-0.10849
-0.329034	0.120147	negative regulation of RNA splicing	21	GO:0010468	regulation of gene expression	9	GO:0033119	1.26582	0.00295	1	-0.356723	0.174624
-0.000314531	-0.250167	regulation of intracellular steroid hormone receptor signaling pathway	48	GO:0009719	response to endogenous stimulus	3	GO:0033143	5	0.00295	2	0.0154734	-0.10849
0.000694814	-0.0701332	regulation of postsynaptic membrane neurotransmitter receptor levels	40	GO:0065008	regulation of biological quality	29	GO:0099072	1.14943	0.00296	2	0.0154734	-0.10849
0.098541	-0.0815018	cilium assembly	16	GO:0120036	plasma membrane bounded cell projection organization	321	GO:0060271	2.87356	0.00296	2	0.0154734	-0.10849
-0.0182901	-0.224687	regulation of ERK1 and ERK2 cascade	35	GO:0035556	intracellular signal transduction	37	GO:0070372	2.75229	0.00302	2	0.0154734	-0.10849
0.00706595	-0.127127	positive regulation of protein-containing complex assembly	26	GO:0051128	regulation of cellular component organization	55	GO:0031334	3.21285	0.00309	2	0.0154734	-0.10849
0.0359281	-0.126946	regulation of stress fiber assembly	58	GO:0030029	actin filament-based process	17	GO:0051492	2.85714	0.0031	2	0.0154734	-0.10849
-0.337415	0.118742	positive regulation of histone methylation	6	GO:0036211	protein modification process	16	GO:0031062	2.17391	0.0031	1	-0.356723	0.174624
0.144112	-0.180142	positive regulation of epithelial cell migration	79	GO:0090130	tissue migration	44	GO:0010634	2.7027	0.00312	3	0.060492	-0.328451
0.327921	0.254213	regulation of epithelial cell differentiation	29	GO:0009888	tissue development	10	GO:0030856	4.09836	0.00314	4	0.314749	0.225188
0.0624424	-0.333213	synaptic vesicle recycling	18	GO:0016192	vesicle-mediated transport	6	GO:0036465	5.74713	0.00314	3	0.060492	-0.328451
-0.0117795	-0.0349303	negative regulation of growth	49	GO:0040007	growth	11	GO:0045926	2.33645	0.00314	4	0.314749	0.225188
0.0928479	-0.127762	adaptive immune response	45	GO:0002376	immune system process	189	GO:0002250	3.06122	0.00316	4	0.314749	0.225188
-0.00389299	-0.111988	negative regulation of chromosome organization	26	GO:0051128	regulation of cellular component organization	1	GO:2001251	2.85714	0.00316	2	0.0154734	-0.10849
-0.00866419	-0.0722556	cellular divalent inorganic cation homeostasis	40	GO:0065008	regulation of biological quality	0	GO:0072503	1.76211	0.00325	2	0.0154734	-0.10849
-0.422761	0.165614	negative regulation of protein phosphorylation	10	GO:0006793	phosphorus metabolic process	112	GO:0001933	2.46479	0.00328	1	-0.356723	0.174624
0.0771518	-0.333629	organic hydroxy compound transport	15	GO:0051179	localization	1	GO:0015850	0	0.00329	3	0.060492	-0.328451
0.0652513	-0.361307	RNA export from nucleus	36	GO:0008104	protein localization	18	GO:0006405	2.22222	0.00331	3	0.060492	-0.328451
-0.0163092	-0.21909	regulation of I-kappaB kinase/NF-kappaB signaling	35	GO:0035556	intracellular signal transduction	34	GO:0043122	2.54777	0.00331	2	0.0154734	-0.10849
-0.00648627	-0.0777688	metal ion homeostasis	40	GO:0065008	regulation of biological quality	2	GO:0055065	1.66113	0.00332	2	0.0154734	-0.10849
-0.338148	0.204391	purine ribonucleoside triphosphate metabolic process	10	GO:0006793	phosphorus metabolic process	0	GO:0009205	1.75439	0.00333	1	-0.356723	0.174624
0.373333	0.278756	formation of primary germ layer	43	GO:0009790	embryo development	3	GO:0001704	1.14943	0.00333	4	0.314749	0.225188
-0.0610882	-0.0718771	negative regulation of cell-cell adhesion	59	GO:0007155	cell adhesion	24	GO:0022408	4.42478	0.00335	2	0.0154734	-0.10849
0.357681	0.265956	liver development	88	GO:0061008	hepaticobiliary system development	77	GO:0001889	2.85714	0.00336	4	0.314749	0.225188
-0.266429	0.170074	carbohydrate metabolic process	87	GO:0005996	monosaccharide metabolic process	204	GO:0005975	1.61725	0.0034	1	-0.356723	0.174624
0.0274794	-0.360605	regulation of sodium ion transport	15	GO:0051179	localization	24	GO:0002028	3.27869	0.00344	3	0.060492	-0.328451
0.381772	0.296465	cardiac cell development	57	GO:0072359	circulatory system development	1	GO:0055006	3.80952	0.00344	4	0.314749	0.225188
0.0838804	-0.00537994	immune effector process	45	GO:0002376	immune system process	0	GO:0002252	3.50195	0.00345	4	0.314749	0.225188
-1.21453e-05	-0.237859	steroid hormone mediated signaling pathway	48	GO:0009719	response to endogenous stimulus	8	GO:0043401	4.28571	0.00346	2	0.0154734	-0.10849
0.364239	0.277746	skeletal muscle tissue development	67	GO:0061061	muscle structure development	78	GO:0007519	1.5748	0.00347	4	0.314749	0.225188
-0.336534	0.198779	protein acylation	6	GO:0036211	protein modification process	1	GO:0043543	2.25225	0.00348	1	-0.356723	0.174624
0.209038	0.179148	negative regulation of fat cell differentiation	22	GO:0048468	cell development	68	GO:0045599	2.85714	0.00353	4	0.314749	0.225188
-0.277631	0.161293	macroautophagy	77	GO:0061919	process utilizing autophagic mechanism	49	GO:0016236	1.18577	0.00354	1	-0.356723	0.174624
-0.000332515	-0.196388	regulation of response to biotic stimulus	66	GO:0043207	response to external biotic stimulus	0	GO:0002831	3.82775	0.00357	2	0.0154734	-0.10849
0.03828	-0.169163	cellular response to heat	64	GO:0009628	response to abiotic stimulus	51	GO:0034605	1.20482	0.00357	2	0.0154734	-0.10849
-0.376814	0.160007	regulation of proteasomal ubiquitin-dependent protein catabolic process	17	GO:1901575	organic substance catabolic process	19	GO:0032434	1.42857	0.00357	1	-0.356723	0.174624
0.0492102	-0.0872339	microtubule-based movement	51	GO:0007017	microtubule-based process	94	GO:0007018	2.43056	0.0036	2	0.0154734	-0.10849
-0.00651645	-0.360665	positive regulation of protein localization to nucleus	36	GO:0008104	protein localization	36	GO:1900182	1.35135	0.00362	3	0.060492	-0.328451
-0.00563611	-0.397702	positive regulation of intracellular protein transport	15	GO:0051179	localization	26	GO:0090316	2.73224	0.00366	3	0.060492	-0.328451
0.0294981	-0.0345145	establishment or maintenance of bipolar cell polarity	69	GO:0007163	establishment or maintenance of cell polarity	0	GO:0061245	1.75439	0.00366	2	0.0154734	-0.10849
0.0294981	-0.0345145	establishment or maintenance of apical/basal cell polarity	69	GO:0007163	establishment or maintenance of cell polarity	5	GO:0035088	1.75439	0.00366	2	0.0154734	-0.10849
0.0797914	-0.0811728	ribonucleoprotein complex biogenesis	26	GO:0051128	regulation of cellular component organization	0	GO:0022613	2.08333	0.0037	2	0.0154734	-0.10849
-0.029838	-0.243262	negative regulation of insulin receptor signaling pathway	2	GO:0070887	cellular response to chemical stimulus	46	GO:0046627	4.91803	0.00372	2	0.0154734	-0.10849
-0.0289269	-0.220673	negative regulation of cellular response to insulin stimulus	2	GO:0070887	cellular response to chemical stimulus	5	GO:1900077	4.91803	0.00372	2	0.0154734	-0.10849
-0.0208224	-0.196101	positive regulation of response to biotic stimulus	66	GO:0043207	response to external biotic stimulus	0	GO:0002833	3.14961	0.00374	2	0.0154734	-0.10849
-0.0119321	-0.194051	ERBB signaling pathway	37	GO:0007166	cell surface receptor signaling pathway	4	GO:0038127	2.3622	0.00375	2	0.0154734	-0.10849
-0.395579	0.162227	positive regulation of protein catabolic process	17	GO:1901575	organic substance catabolic process	90	GO:0045732	2.98507	0.00383	1	-0.356723	0.174624
-0.0420715	-0.0643114	negative regulation of viral process	73	GO:0016032	viral process	5	GO:0048525	2.65487	0.00384	2	0.0154734	-0.10849
-0.0333715	-0.104087	positive regulation of G1/S transition of mitotic cell cycle	24	GO:0022402	cell cycle process	45	GO:1900087	1.63934	0.00386	2	0.0154734	-0.10849
0.0661576	-0.359217	Golgi to plasma membrane protein transport	5	GO:0070727	cellular macromolecule localization	37	GO:0043001	4.16667	0.00387	3	0.060492	-0.328451
0.142685	-0.178228	positive regulation of endothelial cell migration	79	GO:0090130	tissue migration	72	GO:0010595	3.26087	0.00388	3	0.060492	-0.328451
0.40666	0.306185	mononuclear cell differentiation	45	GO:0002376	immune system process	0	GO:1903131	3.16901	0.00394	4	0.314749	0.225188
0.326343	0.224515	erythrocyte differentiation	40	GO:0065008	regulation of biological quality	79	GO:0030218	3.7037	0.00395	2	0.0154734	-0.10849
0.0114057	-0.373714	positive regulation of protein import	15	GO:0051179	localization	5	GO:1904591	1.08696	0.00395	3	0.060492	-0.328451
-0.250199	0.129303	telomere capping	25	GO:0007010	cytoskeleton organization	17	GO:0016233	1.92308	0.00397	2	0.0154734	-0.10849
0.0787205	-0.0804132	organelle fusion	25	GO:0007010	cytoskeleton organization	4	GO:0048284	1.04167	0.00404	2	0.0154734	-0.10849
0.0299869	-0.0343308	establishment of epithelial cell polarity	69	GO:0007163	establishment or maintenance of cell polarity	16	GO:0090162	4.54545	0.00408	2	0.0154734	-0.10849
-0.0163801	-0.0634492	positive regulation of leukocyte activation	78	GO:0045321	leukocyte activation	1	GO:0002696	1.24224	0.00409	4	0.314749	0.225188
-0.340776	0.0936388	negative regulation of kinase activity	10	GO:0006793	phosphorus metabolic process	14	GO:0033673	3.19149	0.0041	1	-0.356723	0.174624
0.00502133	-0.117675	negative regulation of actin filament bundle assembly	26	GO:0051128	regulation of cellular component organization	7	GO:0032232	4.28571	0.0041	2	0.0154734	-0.10849
0.084054	-0.0982988	actin filament polymerization	26	GO:0051128	regulation of cellular component organization	43	GO:0030041	2.91667	0.00411	2	0.0154734	-0.10849
0.0591981	-0.314546	import across plasma membrane	15	GO:0051179	localization	4	GO:0098739	3.125	0.00416	3	0.060492	-0.328451
0.0400965	-0.201251	cellular response to starvation	7	GO:0009605	response to external stimulus	83	GO:0009267	2.18579	0.00418	2	0.0154734	-0.10849
-0.308985	0.1269	regulation of transcription by RNA polymerase III	14	GO:0009059	macromolecule biosynthetic process	3	GO:0006359	7.69231	0.00419	1	-0.356723	0.174624
-0.00486633	-0.358292	positive regulation of protein localization to plasma membrane	36	GO:0008104	protein localization	62	GO:1903078	0	0.0043	3	0.060492	-0.328451
0.0536253	-0.156102	response to light stimulus	64	GO:0009628	response to abiotic stimulus	21	GO:0009416	1.46341	0.0043	2	0.0154734	-0.10849
-0.324922	0.206318	steroid biosynthetic process	85	GO:0044255	cellular lipid metabolic process	73	GO:0006694	0	0.00431	2	0.0154734	-0.10849
0.408176	0.311399	morphogenesis of embryonic epithelium	29	GO:0009888	tissue development	14	GO:0016331	1.49254	0.00431	4	0.314749	0.225188
-0.0124312	-0.0741424	positive regulation of protein binding	27	GO:0065009	regulation of molecular function	91	GO:0032092	2.85714	0.00434	2	0.0154734	-0.10849
-0.0294012	-0.100206	negative regulation of locomotion	38	GO:0040011	locomotion	4	GO:0040013	3.06122	0.00434	3	0.060492	-0.328451
-0.00298408	-0.10788	negative regulation of protein-containing complex disassembly	44	GO:0065003	protein-containing complex assembly	3	GO:0043242	3.47222	0.00436	2	0.0154734	-0.10849
0.0588285	-0.188546	defense response to bacterium	63	GO:0044419	biological process involved in interspecies interaction between organisms	357	GO:0042742	2.85714	0.00436	2	0.0154734	-0.10849
-0.0101831	-0.0730429	cellular ion homeostasis	40	GO:0065008	regulation of biological quality	4	GO:0006873	1.96721	0.00439	2	0.0154734	-0.10849
-0.0269368	-0.219853	G protein-coupled receptor signaling pathway	32	GO:0007165	signal transduction	1973	GO:0007186	2.54237	0.00442	2	0.0154734	-0.10849
0.0774944	-0.0821809	chromatin remodeling	25	GO:0007010	cytoskeleton organization	173	GO:0006338	2.6936	0.00443	2	0.0154734	-0.10849
-0.0487903	-0.211425	negative regulation of intrinsic apoptotic signaling pathway	47	GO:0008219	cell death	35	GO:2001243	3.80952	0.00445	2	0.0154734	-0.10849
0.386203	0.0874493	neuron projection regeneration	84	GO:0031099	regeneration	6	GO:0031102	1.63934	0.00446	4	0.314749	0.225188
0.0414323	-0.0290234	biological process involved in intraspecies interaction between organisms	92	GO:0035176	social behavior	0	GO:0051703	2.08333	0.0045	2	0.0154734	-0.10849
0.0439615	-0.0283225	social behavior	92	GO:0035176	social behavior	70	GO:0035176	2.08333	0.0045	2	0.0154734	-0.10849
0.431021	0.333172	neural tube development	43	GO:0009790	embryo development	51	GO:0021915	1.35135	0.00454	4	0.314749	0.225188
-0.0348488	-0.104352	positive regulation of cell cycle G1/S phase transition	24	GO:0022402	cell cycle process	15	GO:1902808	1.42857	0.00464	2	0.0154734	-0.10849
-0.302297	0.123034	regulation of small molecule metabolic process	68	GO:0055086	nucleobase-containing small molecule metabolic process	0	GO:0062012	2.08333	0.00465	1	-0.356723	0.174624
-0.0123561	-0.21111	regulation of Rho protein signal transduction	35	GO:0035556	intracellular signal transduction	31	GO:0035023	2.85714	0.00466	2	0.0154734	-0.10849
0.077635	-0.345359	protein localization to extracellular region	36	GO:0008104	protein localization	0	GO:0071692	2.20264	0.0047	3	0.060492	-0.328451
0.0648438	-0.37247	protein secretion	36	GO:0008104	protein localization	46	GO:0009306	2.20264	0.0047	3	0.060492	-0.328451
0.0798726	-0.368447	establishment of protein localization to extracellular region	36	GO:0008104	protein localization	0	GO:0035592	2.20264	0.0047	3	0.060492	-0.328451
-0.388242	0.164828	negative regulation of protein catabolic process	17	GO:1901575	organic substance catabolic process	44	GO:0042177	1.48148	0.00471	1	-0.356723	0.174624
-0.0129949	-0.200495	signal transduction by p53 class mediator	35	GO:0035556	intracellular signal transduction	2	GO:0072331	3.93701	0.00471	2	0.0154734	-0.10849
0.0803222	-0.0786343	cell-substrate junction assembly	62	GO:0034330	cell junction organization	6	GO:0007044	2.77778	0.00472	2	0.0154734	-0.10849
0.400531	0.304571	camera-type eye morphogenesis	28	GO:0048513	animal organ development	26	GO:0048593	3.125	0.00482	4	0.314749	0.225188
-0.328141	0.19379	histone methylation	6	GO:0036211	protein modification process	31	GO:0016571	3.27869	0.00482	1	-0.356723	0.174624
-0.00512868	-0.0768538	divalent inorganic cation homeostasis	40	GO:0065008	regulation of biological quality	1	GO:0072507	1.63934	0.00483	2	0.0154734	-0.10849
-0.399388	0.145124	RNA destabilization	17	GO:1901575	organic substance catabolic process	6	GO:0050779	1.69492	0.00488	1	-0.356723	0.174624
-0.175568	-0.0252807	cellular senescence	11	GO:0006950	response to stress	25	GO:0090398	1.42857	0.0049	2	0.0154734	-0.10849
0.274053	0.237877	negative regulation of neuron differentiation	1	GO:0050793	regulation of developmental process	94	GO:0045665	3.84615	0.00492	4	0.314749	0.225188
-0.355921	0.209023	DNA replication	60	GO:0006259	DNA metabolic process	131	GO:0006260	2.32558	0.00493	1	-0.356723	0.174624
-0.224312	0.127718	energy derivation by oxidation of organic compounds	83	GO:0006091	generation of precursor metabolites and energy	0	GO:0015980	3.72671	0.00493	2	0.0154734	-0.10849
0.0253167	-0.047857	execution phase of apoptosis	47	GO:0008219	cell death	22	GO:0097194	0	0.00499	2	0.0154734	-0.10849
-0.374019	0.128966	positive regulation of proteolysis	23	GO:0032268	regulation of cellular protein metabolic process	25	GO:0045862	1.66113	0.00499	1	-0.356723	0.174624
0.00151526	-0.0698445	cardiac muscle cell action potential	40	GO:0065008	regulation of biological quality	3	GO:0086001	2.08333	0.00501	2	0.0154734	-0.10849
0.0460443	-0.202138	cellular response to alcohol	2	GO:0070887	cellular response to chemical stimulus	0	GO:0097306	0	0.00506	2	0.0154734	-0.10849
0.0750106	-0.103465	sister chromatid cohesion	72	GO:0007059	chromosome segregation	21	GO:0007062	6.25	0.00508	2	0.0154734	-0.10849
-0.0122318	-0.209768	regulation of signal transduction by p53 class mediator	35	GO:0035556	intracellular signal transduction	12	GO:1901796	3.27869	0.00509	2	0.0154734	-0.10849
0.052708	-0.0461028	meiotic cell cycle process	46	GO:0000003	reproduction	1	GO:1903046	2.54237	0.0051	2	0.0154734	-0.10849
0.0464465	-0.192566	cellular response to epidermal growth factor stimulus	2	GO:0070887	cellular response to chemical stimulus	44	GO:0071364	3.27869	0.0051	2	0.0154734	-0.10849
-0.0149968	-0.0755856	regulation of protein binding	27	GO:0065009	regulation of molecular function	32	GO:0043393	2.04082	0.00513	2	0.0154734	-0.10849
0.0208547	-0.389678	regulation of secretion	15	GO:0051179	localization	3	GO:0051046	0.808625	0.00519	3	0.060492	-0.328451
-0.313807	0.185298	mRNA transcription by RNA polymerase II	42	GO:0016071	mRNA metabolic process	46	GO:0042789	0	0.00521	1	-0.356723	0.174624
0.0107172	-0.127136	positive regulation of organelle assembly	26	GO:0051128	regulation of cellular component organization	1	GO:1902117	2.29885	0.00522	2	0.0154734	-0.10849
0.384259	0.292091	respiratory tube development	56	GO:0035295	tube development	6	GO:0030323	2.18579	0.00534	4	0.314749	0.225188
-0.00160859	-0.111283	negative regulation of protein polymerization	44	GO:0065003	protein-containing complex assembly	1	GO:0032272	4.7619	0.00535	2	0.0154734	-0.10849
0.0506924	-0.231385	cellular response to lipopolysaccharide	63	GO:0044419	biological process involved in interspecies interaction between organisms	298	GO:0071222	2.14286	0.00541	2	0.0154734	-0.10849
0.0491788	-0.220164	cellular response to molecule of bacterial origin	63	GO:0044419	biological process involved in interspecies interaction between organisms	8	GO:0071219	2.14286	0.00541	2	0.0154734	-0.10849
-0.128124	0.223645	circadian regulation of gene expression	80	GO:0048511	rhythmic process	100	GO:0032922	3.26087	0.00543	2	0.0154734	-0.10849
0.0303396	-0.034162	endothelial cell proliferation	52	GO:0042127	regulation of cell population proliferation	19	GO:0001935	1	0.00544	2	0.0154734	-0.10849
0.0382971	-0.127763	regulation of microtubule polymerization	51	GO:0007017	microtubule-based process	12	GO:0031113	4.81928	0.00544	2	0.0154734	-0.10849
-0.2918	0.173013	protein sumoylation	6	GO:0036211	protein modification process	45	GO:0016925	1.92308	0.00548	1	-0.356723	0.174624
0.046011	-0.046671	movement in host environment	63	GO:0044419	biological process involved in interspecies interaction between organisms	0	GO:0052126	3.26087	0.00549	2	0.0154734	-0.10849
-0.343722	0.202741	DNA modification	60	GO:0006259	DNA metabolic process	4	GO:0006304	1.04167	0.00551	1	-0.356723	0.174624
-0.0100116	-0.0730024	cellular cation homeostasis	40	GO:0065008	regulation of biological quality	2	GO:0030003	1.6835	0.00562	2	0.0154734	-0.10849
-0.00642523	-0.181012	ephrin receptor signaling pathway	37	GO:0007166	cell surface receptor signaling pathway	51	GO:0048013	6.25	0.00572	2	0.0154734	-0.10849
0.081006	-0.115707	spindle assembly	51	GO:0007017	microtubule-based process	44	GO:0051225	1.63934	0.00572	2	0.0154734	-0.10849
0.30545	0.232888	positive regulation of heart growth	49	GO:0040007	growth	3	GO:0060421	4.54545	0.00582	4	0.314749	0.225188
0.327561	0.25338	positive regulation of cardiac muscle tissue growth	49	GO:0040007	growth	0	GO:0055023	4.54545	0.00582	4	0.314749	0.225188
0.0778183	-0.339436	peptide transport	15	GO:0051179	localization	12	GO:0015833	0.636943	0.00582	3	0.060492	-0.328451
0.01387	-0.347848	regulation of sodium ion transmembrane transport	15	GO:0051179	localization	9	GO:1902305	4.54545	0.00583	3	0.060492	-0.328451
0.00305615	-0.348096	regulation of sodium ion transmembrane transporter activity	15	GO:0051179	localization	26	GO:2000649	4.54545	0.00583	3	0.060492	-0.328451
0.0775374	-0.338627	amide transport	15	GO:0051179	localization	1	GO:0042886	0.60241	0.00586	3	0.060492	-0.328451
-0.00476248	-0.0765833	calcium ion homeostasis	40	GO:0065008	regulation of biological quality	57	GO:0055074	1.35135	0.00587	2	0.0154734	-0.10849
-0.325137	0.143708	regulation of protein maturation	23	GO:0032268	regulation of cellular protein metabolic process	1	GO:1903317	3.27869	0.00589	1	-0.356723	0.174624
-0.330558	0.147426	regulation of protein processing	23	GO:0032268	regulation of cellular protein metabolic process	12	GO:0070613	3.27869	0.00589	1	-0.356723	0.174624
0.0775892	-0.0789978	endosome organization	25	GO:0007010	cytoskeleton organization	49	GO:0007032	1.75439	0.00596	2	0.0154734	-0.10849
0.0530718	-0.149918	response to temperature stimulus	64	GO:0009628	response to abiotic stimulus	7	GO:0009266	1.52672	0.00598	2	0.0154734	-0.10849
0.365602	0.273441	embryonic skeletal system development	28	GO:0048513	animal organ development	58	GO:0048706	2	0.00599	4	0.314749	0.225188
-0.00404075	-0.374274	regulation of ion transmembrane transporter activity	27	GO:0065009	regulation of molecular function	3	GO:0032412	2.35294	0.006	2	0.0154734	-0.10849
0.0530939	-0.164766	wound healing	11	GO:0006950	response to stress	90	GO:0042060	3.38346	0.00601	2	0.0154734	-0.10849
0.0629426	-0.340981	vesicle-mediated transport to the plasma membrane	5	GO:0070727	cellular macromolecule localization	0	GO:0098876	2.08333	0.00602	3	0.060492	-0.328451
0.350055	0.191046	positive regulation of axon extension	16	GO:0120036	plasma membrane bounded cell projection organization	53	GO:0045773	1.92308	0.00603	2	0.0154734	-0.10849
0.0771506	-0.337737	sodium ion transport	15	GO:0051179	localization	149	GO:0006814	3.44828	0.00605	3	0.060492	-0.328451
-0.388837	0.140576	regulation of DNA-binding transcription factor activity	27	GO:0065009	regulation of molecular function	20	GO:0051090	1.03093	0.00608	2	0.0154734	-0.10849
0.404789	0.30301	lymphocyte differentiation	45	GO:0002376	immune system process	12	GO:0030098	3.16206	0.00608	4	0.314749	0.225188
-0.0172144	-0.224478	regulation of canonical Wnt signaling pathway	54	GO:0007267	cell-cell signaling	34	GO:0060828	2.11864	0.00611	2	0.0154734	-0.10849
0.285588	0.235265	negative regulation of myeloid cell differentiation	45	GO:0002376	immune system process	24	GO:0045638	1.42857	0.00612	4	0.314749	0.225188
0.262647	0.18037	aging	93	GO:0007568	aging	54	GO:0007568	1.75439	0.00613	4	0.314749	0.225188
0.00454437	-0.130708	negative regulation of actin filament polymerization	44	GO:0065003	protein-containing complex assembly	28	GO:0030837	4.34783	0.0062	2	0.0154734	-0.10849
-0.016901	-0.205904	regulation of response to DNA damage stimulus	34	GO:0048583	regulation of response to stimulus	14	GO:2001020	2.46479	0.00626	2	0.0154734	-0.10849
0.106761	-0.286348	leukocyte migration	19	GO:0048870	cell motility	32	GO:0050900	2.54777	0.0063	3	0.060492	-0.328451
0.305492	0.217275	sex differentiation	46	GO:0000003	reproduction	18	GO:0007548	1.86335	0.00636	4	0.314749	0.225188
0.066161	-0.0124133	B cell activation	78	GO:0045321	leukocyte activation	42	GO:0042113	3.92157	0.00639	4	0.314749	0.225188
-0.0176291	-0.365395	negative regulation of transport	15	GO:0051179	localization	6	GO:0051051	1.15942	0.00642	3	0.060492	-0.328451
0.29673	0.231159	positive regulation of vasculature development	57	GO:0072359	circulatory system development	0	GO:1904018	3.05344	0.00645	4	0.314749	0.225188
0.335558	0.266301	positive regulation of angiogenesis	57	GO:0072359	circulatory system development	187	GO:0045766	3.05344	0.00645	4	0.314749	0.225188
-0.00388445	-0.233946	regulation of oxidative stress-induced cell death	11	GO:0006950	response to stress	0	GO:1903201	1.63934	0.00645	2	0.0154734	-0.10849
0.012152	-0.355895	regulation of potassium ion transmembrane transport	15	GO:0051179	localization	31	GO:1901379	3.50877	0.00651	3	0.060492	-0.328451
-0.0246909	-0.0753515	regulation of cell-substrate adhesion	59	GO:0007155	cell adhesion	3	GO:0010810	1.46341	0.00652	2	0.0154734	-0.10849
0.0598751	-0.186938	response to metal ion	2	GO:0070887	cellular response to chemical stimulus	7	GO:0010038	2.98507	0.00654	2	0.0154734	-0.10849
-0.291979	0.17289	histone H3-K9 methylation	6	GO:0036211	protein modification process	12	GO:0051567	6.25	0.00655	1	-0.356723	0.174624
-0.0103003	-0.203169	DNA damage response, signal transduction by p53 class mediator	35	GO:0035556	intracellular signal transduction	18	GO:0030330	7.69231	0.00661	2	0.0154734	-0.10849
0.000345187	-0.237674	intracellular steroid hormone receptor signaling pathway	48	GO:0009719	response to endogenous stimulus	13	GO:0030518	3.7037	0.00664	2	0.0154734	-0.10849
-0.0231757	-0.325845	negative regulation of cellular component movement	3	GO:0006928	movement of cell or subcellular component	7	GO:0051271	2.48756	0.0067	3	0.060492	-0.328451
0.368008	0.278271	gland morphogenesis	75	GO:0007423	sensory organ development	8	GO:0022612	2.45902	0.00672	4	0.314749	0.225188
-0.330811	0.195469	protein acetylation	6	GO:0036211	protein modification process	21	GO:0006473	2.39234	0.00675	1	-0.356723	0.174624
0.29557	0.237396	negative regulation of hemopoiesis	45	GO:0002376	immune system process	2	GO:1903707	2.7027	0.00676	4	0.314749	0.225188
0.343753	0.249094	male sex differentiation	46	GO:0000003	reproduction	11	GO:0046661	1.35135	0.00676	4	0.314749	0.225188
0.299559	0.227587	positive regulation of myeloid cell differentiation	45	GO:0002376	immune system process	8	GO:0045639	1.14943	0.00676	4	0.314749	0.225188
0.391546	0.29508	morphogenesis of a branching epithelium	41	GO:0009653	anatomical structure morphogenesis	6	GO:0061138	2.29008	0.00677	4	0.314749	0.225188
-0.287033	0.0708171	positive regulation of telomere maintenance	26	GO:0051128	regulation of cellular component organization	14	GO:0032206	1.76991	0.00677	2	0.0154734	-0.10849
0.00622583	-0.124397	positive regulation of supramolecular fiber organization	26	GO:0051128	regulation of cellular component organization	0	GO:1902905	2.63158	0.00678	2	0.0154734	-0.10849
-0.00955644	-0.0726948	cellular metal ion homeostasis	40	GO:0065008	regulation of biological quality	5	GO:0006875	1.52672	0.0068	2	0.0154734	-0.10849
0.0219383	-0.0793206	negative regulation of cell growth	49	GO:0040007	growth	142	GO:0030308	2.40964	0.00682	4	0.314749	0.225188
0.391311	0.298307	cardiac chamber development	57	GO:0072359	circulatory system development	3	GO:0003205	3.61446	0.00683	4	0.314749	0.225188
0.0780932	-0.0743638	membrane fusion	62	GO:0034330	cell junction organization	25	GO:0061025	1.04167	0.00686	2	0.0154734	-0.10849
-0.00990256	-0.18741	integrin-mediated signaling pathway	37	GO:0007166	cell surface receptor signaling pathway	113	GO:0007229	4.05405	0.00688	2	0.0154734	-0.10849
0.0323536	-0.112377	regulation of vacuole organization	25	GO:0007010	cytoskeleton organization	1	GO:0044088	3.50877	0.00689	2	0.0154734	-0.10849
-0.16166	0.0190076	regulation of autophagosome assembly	25	GO:0007010	cytoskeleton organization	10	GO:2000785	3.50877	0.00689	2	0.0154734	-0.10849
0.0205382	-0.38961	regulation of protein targeting	15	GO:0051179	localization	1	GO:1903533	1.42857	0.00691	3	0.060492	-0.328451
-0.0136772	-0.206229	regulation of G protein-coupled receptor signaling pathway	32	GO:0007165	signal transduction	47	GO:0008277	3.79747	0.00691	2	0.0154734	-0.10849
0.045512	-0.193172	cellular response to interleukin-1	2	GO:0070887	cellular response to chemical stimulus	60	GO:0071347	3.79747	0.00692	2	0.0154734	-0.10849
-0.282777	0.165213	snRNA metabolic process	42	GO:0016071	mRNA metabolic process	1	GO:0016073	5.76923	0.00696	1	-0.356723	0.174624
0.323018	0.237349	endothelium development	29	GO:0009888	tissue development	2	GO:0003158	3.26087	0.007	4	0.314749	0.225188
0.174498	-0.184435	regulation of endothelial cell migration	79	GO:0090130	tissue migration	10	GO:0010594	2.29008	0.00703	3	0.060492	-0.328451
0.269187	0.20321	regulation of striated muscle cell differentiation	67	GO:0061061	muscle structure development	3	GO:0051153	1.20482	0.00704	4	0.314749	0.225188
-0.0178302	-0.352191	negative regulation of intracellular transport	15	GO:0051179	localization	4	GO:0032387	1.53846	0.00704	3	0.060492	-0.328451
-0.368768	0.144105	negative regulation of proteasomal protein catabolic process	17	GO:1901575	organic substance catabolic process	13	GO:1901799	1.63934	0.00708	1	-0.356723	0.174624
0.31791	0.244978	regulation of cell morphogenesis involved in differentiation	41	GO:0009653	anatomical structure morphogenesis	1	GO:0010769	2.75229	0.00721	4	0.314749	0.225188
0.21135	0.0102984	muscle adaptation	53	GO:0003008	system process	0	GO:0043500	0.847458	0.00725	4	0.314749	0.225188
0.0314411	-0.0339046	mesenchymal cell proliferation	52	GO:0042127	regulation of cell population proliferation	5	GO:0010463	1.75439	0.00731	2	0.0154734	-0.10849
-0.324002	0.102444	positive regulation of cellular amide metabolic process	55	GO:0043603	cellular amide metabolic process	0	GO:0034250	2.00803	0.00737	1	-0.356723	0.174624
0.0352678	-0.138711	regulation of actin filament polymerization	58	GO:0030029	actin filament-based process	45	GO:0030833	2.29358	0.00738	2	0.0154734	-0.10849
-0.239041	0.138463	cellular carbohydrate metabolic process	87	GO:0005996	monosaccharide metabolic process	3	GO:0044262	1.63934	0.00741	1	-0.356723	0.174624
-0.000672106	-0.386846	positive regulation of protein import into nucleus	15	GO:0051179	localization	55	GO:0042307	1.35135	0.00743	3	0.060492	-0.328451
0.103986	-0.271773	mononuclear cell migration	19	GO:0048870	cell motility	3	GO:0071674	3	0.00746	3	0.060492	-0.328451
0.213206	0.126739	vascular process in circulatory system	53	GO:0003008	system process	0	GO:0003018	4.09836	0.00747	4	0.314749	0.225188
0.309636	0.224866	endoderm development	29	GO:0009888	tissue development	44	GO:0007492	0	0.00749	4	0.314749	0.225188
-0.00831265	-0.0721727	cellular calcium ion homeostasis	40	GO:0065008	regulation of biological quality	156	GO:0006874	1.40187	0.00758	2	0.0154734	-0.10849
-0.330462	0.115425	positive regulation of mRNA processing	42	GO:0016071	mRNA metabolic process	1	GO:0050685	1.42857	0.00761	1	-0.356723	0.174624
0.0753269	-0.0704393	plasma membrane tubulation	65	GO:0010256	endomembrane system organization	24	GO:0097320	4.54545	0.00762	2	0.0154734	-0.10849
0.00502572	-0.126649	negative regulation of actin filament depolymerization	44	GO:0065003	protein-containing complex assembly	8	GO:0030835	3.79747	0.00764	2	0.0154734	-0.10849
-0.362335	0.146829	regulation of histone modification	6	GO:0036211	protein modification process	5	GO:0031056	3.63636	0.00765	1	-0.356723	0.174624
0.0228193	-0.108735	synaptic transmission, glutamatergic	54	GO:0007267	cell-cell signaling	54	GO:0035249	0	0.00766	2	0.0154734	-0.10849
-0.410099	0.180999	nuclear-transcribed mRNA catabolic process	17	GO:1901575	organic substance catabolic process	21	GO:0000956	0.763359	0.00767	1	-0.356723	0.174624
0.315683	0.215474	regulation of erythrocyte differentiation	40	GO:0065008	regulation of biological quality	10	GO:0045646	1.92308	0.00773	2	0.0154734	-0.10849
0.407749	0.241002	central nervous system neuron axonogenesis	9	GO:0030182	neuron differentiation	12	GO:0021955	5.26316	0.00774	4	0.314749	0.225188
-0.0133375	-0.200917	protein kinase B signaling	35	GO:0035556	intracellular signal transduction	53	GO:0043491	0.694444	0.00784	2	0.0154734	-0.10849
0.13866	-0.172648	positive regulation of blood vessel endothelial cell migration	79	GO:0090130	tissue migration	41	GO:0043536	2.7027	0.00787	3	0.060492	-0.328451
0.0453024	-0.210437	cellular response to hydrogen peroxide	11	GO:0006950	response to stress	63	GO:0070301	1.08696	0.0079	2	0.0154734	-0.10849
0.380712	0.288432	cardiac ventricle development	57	GO:0072359	circulatory system development	8	GO:0003231	4.42478	0.00802	4	0.314749	0.225188
0.406843	0.310086	branching morphogenesis of an epithelial tube	41	GO:0009653	anatomical structure morphogenesis	38	GO:0048754	1.69492	0.00802	4	0.314749	0.225188
0.0227151	-0.0492401	neuron death	47	GO:0008219	cell death	13	GO:0070997	2.05882	0.00807	2	0.0154734	-0.10849
-0.00189828	-0.367676	regulation of cation channel activity	27	GO:0065009	regulation of molecular function	3	GO:2001257	2.85714	0.00808	2	0.0154734	-0.10849
-0.23263	0.192759	production of molecular mediator of immune response	45	GO:0002376	immune system process	0	GO:0002440	4	0.00819	4	0.314749	0.225188
0.201428	0.117301	multi-multicellular organism process	39	GO:0032501	multicellular organismal process	0	GO:0044706	1.14943	0.0082	4	0.314749	0.225188
-0.0588465	-0.0710756	negative regulation of leukocyte cell-cell adhesion	59	GO:0007155	cell adhesion	6	GO:1903038	5.06329	0.00825	2	0.0154734	-0.10849
-0.313055	0.18544	transcription elongation from RNA polymerase II promoter	14	GO:0009059	macromolecule biosynthetic process	27	GO:0006368	0	0.00829	1	-0.356723	0.174624
0.00311357	-0.376553	regulation of secretion by cell	15	GO:0051179	localization	0	GO:1903530	0.558659	0.00835	3	0.060492	-0.328451
0.334312	0.254738	columnar/cuboidal epithelial cell differentiation	29	GO:0009888	tissue development	0	GO:0002065	5.71429	0.00836	4	0.314749	0.225188
0.393313	0.300087	lung development	56	GO:0035295	tube development	139	GO:0030324	2.23464	0.00841	4	0.314749	0.225188
0.0233682	-0.38975	regulation of metal ion transport	15	GO:0051179	localization	0	GO:0010959	1.66667	0.00841	3	0.060492	-0.328451
0.0517798	-0.148447	response to axon injury	11	GO:0006950	response to stress	24	GO:0048678	1.75439	0.00842	2	0.0154734	-0.10849
0.0751329	-0.324208	protein localization to synapse	36	GO:0008104	protein localization	20	GO:0035418	0	0.00842	3	0.060492	-0.328451
0.0605648	-0.189306	response to monoamine	2	GO:0070887	cellular response to chemical stimulus	0	GO:0071867	1.75439	0.00844	2	0.0154734	-0.10849
0.0467398	-0.204915	cellular response to monoamine stimulus	2	GO:0070887	cellular response to chemical stimulus	0	GO:0071868	1.75439	0.00844	2	0.0154734	-0.10849
0.0614887	-0.195971	response to catecholamine	2	GO:0070887	cellular response to chemical stimulus	1	GO:0071869	1.75439	0.00844	2	0.0154734	-0.10849
0.0475784	-0.209908	cellular response to catecholamine stimulus	2	GO:0070887	cellular response to chemical stimulus	5	GO:0071870	1.75439	0.00844	2	0.0154734	-0.10849
0.0607753	-0.336104	calcium ion transmembrane transport	15	GO:0051179	localization	120	GO:0070588	1.38889	0.00849	3	0.060492	-0.328451
-0.00622157	-0.369739	negative regulation of establishment of protein localization	36	GO:0008104	protein localization	1	GO:1904950	0	0.00855	3	0.060492	-0.328451
-0.198378	0.0941065	autophagosome assembly	25	GO:0007010	cytoskeleton organization	98	GO:0000045	1.83486	0.00859	1	-0.356723	0.174624
-0.00102255	-0.0717754	action potential	40	GO:0065008	regulation of biological quality	26	GO:0001508	1.26582	0.00859	2	0.0154734	-0.10849
0.0362888	-0.132299	regulation of actin filament depolymerization	44	GO:0065003	protein-containing complex assembly	2	GO:0030834	3.26087	0.00866	2	0.0154734	-0.10849
0.0327179	-0.174463	regulation of immune response	45	GO:0002376	immune system process	54	GO:0050776	1.97044	0.00868	4	0.314749	0.225188
0.35853	0.26703	artery development	57	GO:0072359	circulatory system development	15	GO:0060840	3.44828	0.0088	4	0.314749	0.225188
0.250686	0.18445	regulation of stem cell differentiation	22	GO:0048468	cell development	9	GO:2000736	1.20482	0.00884	4	0.314749	0.225188
-0.330742	0.133856	regulation of protein deacetylation	6	GO:0036211	protein modification process	4	GO:0090311	3.66972	0.00886	1	-0.356723	0.174624
-0.00364664	-0.0634433	regulation of behavior	81	GO:0007626	locomotory behavior	11	GO:0050795	2.27273	0.00888	2	0.0154734	-0.10849
0.0307293	-0.033622	neural precursor cell proliferation	52	GO:0042127	regulation of cell population proliferation	21	GO:0061351	2.29885	0.00891	2	0.0154734	-0.10849
0.221216	0.134071	heart process	53	GO:0003008	system process	9	GO:0003015	3.81679	0.00897	4	0.314749	0.225188
-0.312808	0.111358	positive regulation of transcription by RNA polymerase III	14	GO:0009059	macromolecule biosynthetic process	20	GO:0045945	8.33333	0.00906	1	-0.356723	0.174624
0.0812774	-0.0845548	mitochondrion organization	25	GO:0007010	cytoskeleton organization	120	GO:0007005	1.43369	0.00907	2	0.0154734	-0.10849
0.300296	0.221359	syncytium formation by plasma membrane fusion	94	GO:0140253	cell-cell fusion	7	GO:0000768	0	0.00909	2	0.0154734	-0.10849
0.300375	0.221817	syncytium formation	41	GO:0009653	anatomical structure morphogenesis	2	GO:0006949	0	0.00909	4	0.314749	0.225188
0.0299181	-0.0316863	cell-cell fusion	94	GO:0140253	cell-cell fusion	1	GO:0140253	0	0.00909	2	0.0154734	-0.10849
-0.00508307	-0.368188	regulation of transmembrane transporter activity	27	GO:0065009	regulation of molecular function	7	GO:0022898	2.29885	0.00923	2	0.0154734	-0.10849
0.0432505	-0.216386	cellular response to chemical stress	11	GO:0006950	response to stress	0	GO:0062197	1.93548	0.00924	2	0.0154734	-0.10849
0.374091	0.27822	male gonad development	46	GO:0000003	reproduction	119	GO:0008584	1.53846	0.00926	4	0.314749	0.225188
0.339993	0.24562	development of primary male sexual characteristics	46	GO:0000003	reproduction	4	GO:0046546	1.53846	0.00926	4	0.314749	0.225188
-0.329439	0.116351	positive regulation of mRNA splicing, via spliceosome	42	GO:0016071	mRNA metabolic process	39	GO:0048026	1.75439	0.00932	1	-0.356723	0.174624
0.0763682	-0.330499	cytosolic calcium ion transport	15	GO:0051179	localization	2	GO:0060401	2	0.00934	3	0.060492	-0.328451
-0.0315863	-0.0790548	regulation of cell-cell adhesion	59	GO:0007155	cell adhesion	19	GO:0022407	3.55731	0.00937	2	0.0154734	-0.10849
-0.282028	0.180232	carbohydrate biosynthetic process	87	GO:0005996	monosaccharide metabolic process	9	GO:0016051	1.30719	0.00946	1	-0.356723	0.174624
0.0621378	-0.344271	cytoskeleton-dependent intracellular transport	5	GO:0070727	cellular macromolecule localization	15	GO:0030705	3.48259	0.00949	3	0.060492	-0.328451
0.375346	0.276718	osteoclast differentiation	45	GO:0002376	immune system process	54	GO:0030316	3.79747	0.0095	4	0.314749	0.225188
0.000209986	-0.0802728	regulation of biological process involved in symbiotic interaction	63	GO:0044419	biological process involved in interspecies interaction between organisms	0	GO:0043903	2.08333	0.00951	2	0.0154734	-0.10849
0.000739598	-0.0798463	modulation by symbiont of entry into host	63	GO:0044419	biological process involved in interspecies interaction between organisms	0	GO:0052372	2.08333	0.00951	2	0.0154734	-0.10849
0.0153317	-0.376133	regulation of protein localization to plasma membrane	36	GO:0008104	protein localization	29	GO:1903076	0	0.00953	3	0.060492	-0.328451
-0.350389	0.142128	regulation of DNA recombination	60	GO:0006259	DNA metabolic process	4	GO:0000018	2.75229	0.0096	1	-0.356723	0.174624
0.406131	0.310353	ear morphogenesis	75	GO:0007423	sensory organ development	6	GO:0042471	4.28571	0.00961	4	0.314749	0.225188
0.0659734	-0.372719	protein targeting to membrane	5	GO:0070727	cellular macromolecule localization	49	GO:0006612	2.85714	0.00961	3	0.060492	-0.328451
0.237396	0.181352	positive regulation of osteoblast differentiation	70	GO:0001503	ossification	91	GO:0045669	6.55738	0.00966	4	0.314749	0.225188
0.0819848	-0.0917528	actin polymerization or depolymerization	26	GO:0051128	regulation of cellular component organization	22	GO:0008154	2.73973	0.00969	2	0.0154734	-0.10849
0.104584	-0.274703	myeloid leukocyte migration	19	GO:0048870	cell motility	0	GO:0097529	1.35135	0.00973	3	0.060492	-0.328451
-0.460468	0.170105	mRNA destabilization	17	GO:1901575	organic substance catabolic process	26	GO:0061157	1.76991	0.00981	1	-0.356723	0.174624
0.359062	0.25285	thymus development	75	GO:0007423	sensory organ development	64	GO:0048538	3.27869	0.00988	4	0.314749	0.225188
0.0307941	-0.139022	regulation of sister chromatid segregation	72	GO:0007059	chromosome segregation	2	GO:0033045	1.35135	0.00995	2	0.0154734	-0.10849
