# Supplementary material for: Phosphoproteomic mapping reveals distinct signaling actions and activation of muscle protein synthesis by Isthmin-1
Source: eLife. 2022 Sep 28;11:e80014. doi: 10.7554/eLife.80014 (PMC9592085; doi:10.7554/eLife.80014)
Supplement: Figure 2—source data 2. [file elife-80014-fig2-data2.xlsx]

## Sheet: Sheet1
Fig 2B	BSA	ISM1	INS
Replicate 1	0	0.460475	0.961763
Replicate 2	0	0	1
mean
Empirical Bayes statistics using limma ISM1/BSA adjusted using FDR	0.413957
Empirical Bayes statistics using limma INS/BSA adjusted using FDR		8.34175e-05
Empirical Bayes statistics using limma ISM1/INS adjusted using FDR			1.12042e-09
Fig 2E	BSA	ISM1	INS
Replicate 1	0.724666	0	1
Replicate 2	0.555211	0	0.957773
Empirical Bayes statistics using limma ISM1/BSA adjusted using FDR	0.742478
Empirical Bayes statistics using limma INS/BSA adjusted using FDR		0.0151749
Empirical Bayes statistics using limma ISM1/INS adjusted using FDR			0.000123075
Fig 2F	BSA	ISM1	INS
Replicate 1	0.756615	0	0.959413
Replicate 2	0.57969	0	1
Empirical Bayes statistics using limma ISM1/BSA adjusted using FDR	0.717851
Empirical Bayes statistics using limma INS/BSA adjusted using FDR		0.0462769
Empirical Bayes statistics using limma ISM1/INS adjusted using FDR			0.00100179
Fig 2G	BSA	ISM1	INS
Replicate 1	0	0.981179	0
Replicate 2	0	1	0
Empirical Bayes statistics using limma ISM1/BSA adjusted using FDR	4.16188e-06
Empirical Bayes statistics using limma INS/BSA adjusted using FDR		0.906737
Empirical Bayes statistics using limma ISM1/INS adjusted using FDR			3.48852e-05
Fig 2H	BSA	ISM1	INS
Replicate 1	0.744069	1	0
Replicate 2	0	0.99311	0
Empirical Bayes statistics using limma ISM1/BSA adjusted using FDR	0.0173818
Empirical Bayes statistics using limma INS/BSA adjusted using FDR		0.829
Empirical Bayes statistics using limma ISM1/INS adjusted using FDR			0.000899708
Fig 2I	BSA	ISM1	INS
Replicate 1	0.783293	0.919075	0.984157
Replicate 2	0.776454	0.955698	1
Empirical Bayes statistics using limma ISM1/BSA adjusted using FDR	0.000356833
Empirical Bayes statistics using limma INS/BSA adjusted using FDR		3.13383e-07
Empirical Bayes statistics using limma ISM1/INS adjusted using FDR			0.761037
Fig 2J	BSA	ISM1	INS
Replicate 1	0	0	1
Replicate 2	0	0	0.890699
Empirical Bayes statistics using limma ISM1/BSA adjusted using FDR	0.906992
Empirical Bayes statistics using limma INS/BSA adjusted using FDR		0.0174926
Empirical Bayes statistics using limma ISM1/INS adjusted using FDR			0.00346752
Fig 2K	BSA	ISM1	INS
Replicate 1	0.789705	0.981761	0.556333
Replicate 2	0.802835	1	0.493354
Empirical Bayes statistics using limma ISM1/BSA adjusted using FDR	0.00134634
Empirical Bayes statistics using limma INS/BSA adjusted using FDR		1.10082e-06
Empirical Bayes statistics using limma ISM1/INS adjusted using FDR			3.75954e-14
Fig 2L	BSA	ISM1	INS
Replicate 1	1	0	0
Replicate 2	0.926719	0	0
Empirical Bayes statistics using limma ISM1/BSA adjusted using FDR	8.70566e-09
Empirical Bayes statistics using limma INS/BSA adjusted using FDR		5.9716e-06
Empirical Bayes statistics using limma ISM1/INS adjusted using FDR			0.931473
Fig 2M	BSA	ISM1	INS
Replicate 1	1	0	0
Replicate 2	0.926719	0	0
Empirical Bayes statistics using limma ISM1/BSA adjusted using FDR	2.34528e-07
Empirical Bayes statistics using limma INS/BSA adjusted using FDR		1.19233e-05
Empirical Bayes statistics using limma ISM1/INS adjusted using FDR			0.928866
Fig 2N	BSA	ISM1	INS
Replicate 1	0.528783	0.800597	1
Replicate 2	0.518211	0.696621	0.960825
Empirical Bayes statistics using limma ISM1/BSA adjusted using FDR	0.0143141
Empirical Bayes statistics using limma INS/BSA adjusted using FDR		7.12093e-10
Empirical Bayes statistics using limma ISM1/INS adjusted using FDR			0.0157638
