# Supplementary material for: Phosphoproteomic mapping reveals distinct signaling actions and activation of muscle protein synthesis by Isthmin-1
Source: eLife. 2022 Sep 28;11:e80014. doi: 10.7554/eLife.80014 (PMC9592085; doi:10.7554/eLife.80014)
Supplement: Figure 3—source data 1. [file elife-80014-fig3-data1.xlsx]

## Sheet: Sheet1
Figure 3B
p-AKT S473	BSA	Ism1	Igf1
	0.168634	0.168634	0.168634
5min	0.168634	0.607927	2.70816
15min	0.1189	0.899497	2.46015
1h	0.351442	0.729797	0.927415
4h	0.129136	0.471305	0.571607
24h	0.0780114	0.0748685	1.0776
p-S6 S235/236	BSA	Ism1	Igf1
	0.41939	0.41939	0.41939
5min	0.41939	0.704434	0.702498
15min	0.595648	0.70565	1.02219
1h	0.53994	0.877145	0.654917
4h	0.399891	0.80578	0.499964
24h	0.396701	0.244653	0.412047
Figure 3D
Ctrl	Ism1	Igf1	Ism1 + Igf1
0.981156	2.4377	3.47722	4.0852
1.04974	2.59672	2.44538	1.76212
0.969102	2.58975	3.41709	2.72777
	Significance	P value
Ctrl vs. Ism1	*	0.0493
Ctrl vs. Igf1	*	0.0106
Ctrl vs. Ism1 + Igf1	*	0.0207
Figure 3E
	DMSO			Rapamycin
BSA	1.03642	1.01172	0.951852	0.964827	0.915968	0.848366
Ism1	1.27779	1.16148	1.11865	0.84055	0.990152	0.905251
Igf1	1.12865	1.25653	1.12693	0.929188	0.899171	0.969204
DMSO	Significance	P value		Rapamycin	Significance	P value
BSA vs. Ism1	*	0.01		BSA vs. Ism1	ns	0.999
BSA vs. Igf1	*	0.017		BSA vs. Igf1	ns	0.9009
Ism1 vs. Igf1	ns	0.954		Ism1 vs. Igf1	ns	0.9186
DMSO - Rapamycin	Significance	P value
BSA	ns	0.2928
Ism1	***	0.0006
Igf1	**	0.0019
