# Supplementary material for: Phosphoproteomic mapping reveals distinct signaling actions and activation of muscle protein synthesis by Isthmin-1
Source: eLife. 2022 Sep 28;11:e80014. doi: 10.7554/eLife.80014 (PMC9592085; doi:10.7554/eLife.80014)
Supplement: Figure 4—source data 1. [file elife-80014-fig4-data1.xlsx]

## Sheet: Sheet1
Figure 4B
	WT			KO
Fed	31.5	31.6	28.8	31.5	31.2	29.7
Fasted	27.1	28.4	24	24.5	26.6	29.3
		Significance	P value
Fed:WT vs. Fed:KO		ns	>0.9999
Fed:WT vs. Fasted:WT		ns	0.158
Fed:WT vs. Fasted:KO		ns	0.2084
Fed:KO vs. Fasted:WT		ns	0.1352
Fed:KO vs. Fasted:KO		ns	0.1788
Fasted:WT vs. Fasted:KO		ns	>0.9999
Figure 4C
	WT			KO
Fed	149	168	151	162	144	171
Fasted	87	82	73	73	81	73
		Significance	P value
Fed:WT vs. Fed:KO		ns	0.9797
Fed:WT vs. Fasted:WT		***	<0.0001
Fed:WT vs. Fasted:KO		***	<0.0001
Fed:KO vs. Fasted:WT		***	<0.0001
Fed:KO vs. Fasted:KO		***	<0.0001
Fasted:WT vs. Fasted:KO		ns	0.9171
Figure 4E
Count						Percentage
Area (um2)	WT - fed	WT - fasted	KO - fed	KO - fasted		Area (um2)	WT - fast+feed	WT - fast	KO - fast+feed	KO - fast
200	0	0	0	4		200	0	0	0	0.376648
400	19	9	17	98		400	2.14689	1.74419	2.55255	9.22787
600	47	43	64	206		600	5.31073	8.33333	9.60961	19.3974
800	72	52	107	204		800	8.13559	10.0775	16.0661	19.209
1000	88	61	87	177		1000	9.9435	11.8217	13.0631	16.6667
1200	79	75	124	139		1200	8.92655	14.5349	18.6186	13.0885
1400	93	54	119	93		1400	10.5085	10.4651	17.8679	8.75706
1600	78	68	66	56		1600	8.81356	13.1783	9.90991	5.27307
1800	82	49	43	40		1800	9.26554	9.49612	6.45646	3.76648
2000	53	38	18	25		2000	5.9887	7.36434	2.7027	2.35405
2200	35	25	11	6		2200	3.9548	4.84496	1.65165	0.564972
2400	29	16	4	4		2400	3.27684	3.10078	0.600601	0.376648
2600	38	7	2	5		2600	4.29379	1.35659	0.3003	0.47081
2800	29	9	3	3		2800	3.27684	1.74419	0.45045	0.282486
3000	33	3	0	0		3000	3.72881	0.581395	0	0
3200	20	4	0	2		3200	2.25989	0.775194	0	0.188324
3400	29	1	0	0		3400	3.27684	0.193798	0	0
3600	15	1	1	0		3600	1.69492	0.193798	0.15015	0
3800	16	0	0	0		3800	1.80791	0	0	0
4000	5	0	0	0		4000	0.564972	0	0	0
4200	10	0	0	0		4200	1.12994	0	0	0
4400	4	1	0	0		4400	0.451977	0.193798	0	0
4600	3	0	0	0		4600	0.338983	0	0	0
4800	3	0	0	0		4800	0.338983	0	0	0
5000	1	0	0	0		5000	0.112994	0	0	0
5200	4	0	0	0		5200	0.451977	0	0	0
Figure 4F
	WT												KO
Fed	3739.07	2724.15	2589.18	1755.82	2268.82	2524.67	825.438	1218.62	964.392	2296.32	2634.78	2118.47	790.193	1251.04	1020.02	1231.43	1398.55	1854.21	1045.18	1152.91	1091.46	941.59	1026.02	1138.47
Fasted	1268.95	1428.21	1337.58	1233.33	1311.38	1859.14	1922.36						828.263	887.192	944.362	839.117	541.607	820.7	780.292	799.105	850.737	946.487	885.023	806.888
		Significance	P value
Fed:WT vs. Fed:KO		***	<0.0001
Fed:WT vs. Fasted:WT		*	0.0319
Fed:WT vs. Fasted:KO		***	<0.0001
Fed:KO vs. Fasted:WT		ns	0.5132
Fed:KO vs. Fasted:KO		ns	0.3376
Fasted:WT vs. Fasted:KO		*	0.0338
Figure 4G
WT	KO
0.73	0.44
0.56	0.54
0.61	0.61
0.52	0.51
0.51	0.38
0.32	0.44
0.6	0.46
0.55	0.47
0.51	0.47
0.61	0.54
0.56	0.49
0.48	0.5
0.62	0.5
0.63	0.44
0.64	0.42
	Significance	P value
WT vs. KO	**	0.0065
