# Supplementary material for: Phosphoproteomic mapping reveals distinct signaling actions and activation of muscle protein synthesis by Isthmin-1
Source: eLife. 2022 Sep 28;11:e80014. doi: 10.7554/eLife.80014 (PMC9592085; doi:10.7554/eLife.80014)
Supplement: Figure 5—source data 1. [file elife-80014-fig5-data1.xlsx]

## Sheet: Sheet1
Figure 5A-D
	Subject ID	Total.Mass	Group	Time of Day	Cumulative Food Intake (kcal)	Oxygen Consumption (ml/hr)	Respiratory Exchange Ratio	Ambulatory Activity (beam breaks/hr)	Hour	Day
1	ko1	28.1	KO	0	3.204	129.411	0.972444	396.556	34	1
2	ko1	28.1	KO	0	4.806	118.378	1.0045	254.125	35	1
3	ko1	28.1	KO	0	7.9388	120.617	1.01522	258.778	36	1
4	ko1	28.1	KO	0	8.4728	98.6806	1.00589	151.889	37	1
5	ko1	28.1	KO	0	8.4728	111.919	1.01467	241.667	38	1
6	ko1	28.1	KO	0	8.4728	112	1	297.222	39	1
7	ko1	28.1	KO	0	8.7576	105.492	0.972667	304.444	40	1
8	ko1	28.1	KO	0	9.9324	112.211	0.972222	460.444	41	1
9	ko1	28.1	KO	0	9.9324	96.7972	0.897889	41.5556	42	1
10	ko1	28.1	KO	0	10.8224	93.8806	0.915667	27.8889	43	1
11	ko1	28.1	KO	0	11.57	124.259	0.959875	369.125	44	1
12	ko1	28.1	KO	0	12.638	125.994	0.977778	799.556	45	1
13	ko1	28.1	KO	1	0	101.742	0.849667	61.7778	23	1
14	ko1	28.1	KO	1	1.5664	86.2667	0.851333	5.22222	24	1
15	ko1	28.1	KO	1	1.5664	92.3139	0.826111	23	25	1
16	ko1	28.1	KO	1	1.5664	102.016	0.828125	105.625	26	1
17	ko1	28.1	KO	1	1.5664	86.8083	0.857556	12.5556	27	1
18	ko1	28.1	KO	1	1.5664	77.7056	0.839111	4.22222	28	1
19	ko1	28.1	KO	1	1.5664	89.0944	0.818556	27.7778	29	1
20	ko1	28.1	KO	1	1.5664	78.5639	0.795889	4.44444	30	1
21	ko1	28.1	KO	1	1.5664	87.1778	0.819667	19.1111	31	1
22	ko1	28.1	KO	1	1.78	86.2722	0.822	25.1111	32	1
23	ko1	28.1	KO	1	2.3496	88.6556	0.944333	25.4444	33	1
24	ko1	28.1	KO	0	18.868	125.828	0.979	482.667	58	2
25	ko1	28.1	KO	0	20.5056	116.092	1.00344	163.333	59	2
26	ko1	28.1	KO	0	22.072	103.239	1.01367	141.778	60	2
27	ko1	28.1	KO	0	23.496	116.428	1.038	287.889	61	2
28	ko1	28.1	KO	0	24.0656	107.975	1.02	306.75	62	2
29	ko1	28.1	KO	0	25.4184	93.2083	1.01411	53.5556	63	2
30	ko1	28.1	KO	0	25.9524	115	1.02544	428.778	64	2
31	ko1	28.1	KO	0	26.0948	101.631	0.984889	163.889	65	2
32	ko1	28.1	KO	0	27.9104	95.4111	0.987778	56.6667	66	2
33	ko1	28.1	KO	0	28.3376	93.5389	0.987222	24	67	2
34	ko1	28.1	KO	0	29.0852	129.264	0.991444	584.778	68	2
35	ko1	28.1	KO	0	31.2568	120.756	0.992111	551.778	69	2
36	ko1	28.1	KO	1	13.8128	102.081	0.959889	144.111	46	2
37	ko1	28.1	KO	1	13.8128	98.5056	0.927333	113.667	47	2
38	ko1	28.1	KO	1	13.8128	81.1667	0.859556	15.4444	48	2
39	ko1	28.1	KO	1	14.774	80.5028	0.835111	9.11111	49	2
40	ko1	28.1	KO	1	15.0232	99.55	0.848	97.8889	50	2
41	ko1	28.1	KO	1	15.0232	78.9917	0.832444	7.44444	51	2
42	ko1	28.1	KO	1	15.308	83.5	0.833	16.3333	52	2
43	ko1	28.1	KO	1	15.308	85.975	0.8135	10.25	53	2
44	ko1	28.1	KO	1	16.198	85.1889	0.874111	52.5556	54	2
45	ko1	28.1	KO	1	16.198	79.4833	0.837444	7.55556	55	2
46	ko1	28.1	KO	1	17.6932	89.2806	0.914556	21.8889	56	2
47	ko1	28.1	KO	1	18.512	94.2472	0.947444	32.3333	57	2
48	ko1	28.1	KO	1	31.2568	91.2944	0.937	57.3333	70	3
49	ko2	26.6	KO	0	4.3432	121.025	0.962333	428.444	34	1
50	ko2	26.6	KO	0	5.696	122.408	0.981	484.889	35	1
51	ko2	26.6	KO	0	7.8676	120.014	0.997222	461.111	36	1
52	ko2	26.6	KO	0	8.01	114.775	0.995667	504.556	37	1
53	ko2	26.6	KO	0	8.8288	101.292	0.966222	100.667	38	1
54	ko2	26.6	KO	0	9.6476	101.683	0.972222	189.333	39	1
55	ko2	26.6	KO	0	9.968	95.0722	0.944111	43.2222	40	1
56	ko2	26.6	KO	0	10.146	115.683	0.976333	402.667	41	1
57	ko2	26.6	KO	0	10.146	81.6469	0.855	8	42	1
58	ko2	26.6	KO	0	11.214	100.411	0.908	117.667	43	1
59	ko2	26.6	KO	0	11.214	86.8139	0.912444	24.8889	44	1
60	ko2	26.6	KO	0	12.46	116.814	0.980667	425.333	45	1
61	ko2	26.6	KO	1	0	91.2556	0.841222	28.6667	23	1
62	ko2	26.6	KO	1	0.534	102.834	0.912125	174.875	24	1
63	ko2	26.6	KO	1	0.534	88.1944	0.830889	8	25	1
64	ko2	26.6	KO	1	1.4952	87.6444	0.917556	58	26	1
65	ko2	26.6	KO	1	1.8512	84.2528	0.907333	23	27	1
66	ko2	26.6	KO	1	2.136	86.0306	0.874556	31.3333	28	1
67	ko2	26.6	KO	1	2.136	81.8167	0.865222	17	29	1
68	ko2	26.6	KO	1	2.136	81.2639	0.876222	31	30	1
69	ko2	26.6	KO	1	3.026	95.0861	0.857889	116.111	31	1
70	ko2	26.6	KO	1	3.026	82.7333	0.919222	20.3333	32	1
71	ko2	26.6	KO	1	3.1684	89.5	0.937875	32.125	33	1
72	ko2	26.6	KO	0	19.0816	123.95	0.962111	470.778	58	2
73	ko2	26.6	KO	0	20.1852	115.35	0.992889	429.222	59	2
74	ko2	26.6	KO	0	21.5736	109.344	0.9935	338	60	2
75	ko2	26.6	KO	0	22.7128	109.428	1.00556	259.556	61	2
76	ko2	26.6	KO	0	22.962	94.5722	0.997556	104	62	2
77	ko2	26.6	KO	0	24.7776	123.786	1.003	506.333	63	2
78	ko2	26.6	KO	0	24.7776	107.953	0.952333	199.444	64	2
79	ko2	26.6	KO	0	25.632	94.5944	0.929222	76.3333	65	2
80	ko2	26.6	KO	0	26.0592	102.328	0.952667	252.556	66	2
81	ko2	26.6	KO	0	26.0592	91.7028	0.891778	59.4444	67	2
82	ko2	26.6	KO	0	26.7356	103.086	0.922667	141.889	68	2
83	ko2	26.6	KO	0	27.056	101.172	0.949	117.875	69	2
84	ko2	26.6	KO	1	12.46	85.5056	0.927333	6.33333	46	2
85	ko2	26.6	KO	1	13.4212	99.5833	0.938889	135.444	47	2
86	ko2	26.6	KO	1	13.4212	78.5	0.908111	3.55556	48	2
87	ko2	26.6	KO	1	13.9196	91.7722	0.943667	91.3333	49	2
88	ko2	26.6	KO	1	15.5216	95.6028	0.928889	80.8889	50	2
89	ko2	26.6	KO	1	15.5216	85.5438	0.895	18.625	51	2
90	ko2	26.6	KO	1	15.5216	95.5417	0.903333	164.556	52	2
91	ko2	26.6	KO	1	15.5216	84.6694	0.909778	31.1111	53	2
92	ko2	26.6	KO	1	17.1236	84.3028	0.935333	47.7778	54	2
93	ko2	26.6	KO	1	17.1236	87.8333	0.974889	24.1111	55	2
94	ko2	26.6	KO	1	17.3016	79.8361	0.956556	18	56	2
95	ko2	26.6	KO	1	18.0492	95.9333	0.908222	37.5556	57	2
96	ko2	26.6	KO	1	27.4476	78.225	0.887	4.88889	70	3
97	ko3	27.3	KO	0	3.3108	119.856	0.951889	367.889	34	1
98	ko3	27.3	KO	0	5.1976	119.619	0.970444	407.556	35	1
99	ko3	27.3	KO	0	5.9096	123.811	0.976889	497.444	36	1
100	ko3	27.3	KO	0	7.7964	99.875	0.947444	74	37	1
101	ko3	27.3	KO	0	7.9388	118.528	0.984778	572.667	38	1
102	ko3	27.3	KO	0	8.1168	111.803	0.965778	517.333	39	1
103	ko3	27.3	KO	0	8.1168	100.787	0.87875	338.75	40	1
104	ko3	27.3	KO	0	9.2204	89.1194	0.833889	81	41	1
105	ko3	27.3	KO	0	9.2204	99.4667	0.836556	363.667	42	1
106	ko3	27.3	KO	0	9.2204	84.9056	0.790778	80.5556	43	1
107	ko3	27.3	KO	0	9.2204	112.419	0.89	245.556	44	1
108	ko3	27.3	KO	0	9.79	90.4667	0.900111	113	45	1
109	ko3	27.3	KO	1	0.4272	78.2611	0.811556	4	23	1
110	ko3	27.3	KO	1	1.0324	103.475	0.806111	227.444	24	1
111	ko3	27.3	KO	1	1.0324	80.775	0.762444	2.88889	25	1
112	ko3	27.3	KO	1	1.0324	88.2917	0.774111	62.3333	26	1
113	ko3	27.3	KO	1	1.4596	89.5472	0.867111	97.6667	27	1
114	ko3	27.3	KO	1	1.4596	75.8389	0.849778	8	28	1
115	ko3	27.3	KO	1	1.8512	94.1694	0.871111	94.3333	29	1
116	ko3	27.3	KO	1	1.8512	75.7639	0.839778	8.33333	30	1
117	ko3	27.3	KO	1	1.8512	87.8219	0.846125	41	31	1
118	ko3	27.3	KO	1	1.8512	80.0722	0.881222	10.4444	32	1
119	ko3	27.3	KO	1	2.492	93.1028	0.901778	29	33	1
120	ko3	27.3	KO	0	13.528	119.694	0.980125	523.875	58	2
121	ko3	27.3	KO	0	15.5216	118.311	0.981444	468.667	59	2
122	ko3	27.3	KO	0	17.0524	108.847	0.990556	316.333	60	2
123	ko3	27.3	KO	0	19.3664	114.792	1.013	483.556	61	2
124	ko3	27.3	KO	0	20.1496	105.925	0.996889	285.333	62	2
125	ko3	27.3	KO	0	20.5056	114.167	1.02111	291	63	2
126	ko3	27.3	KO	0	21.2888	102.181	0.983556	237.444	64	2
127	ko3	27.3	KO	0	22.1076	110.242	1.00644	454.889	65	2
128	ko3	27.3	KO	0	22.606	91.9333	0.975667	145.778	66	2
129	ko3	27.3	KO	0	25.2404	79.8937	0.978	34.5	67	2
130	ko3	27.3	KO	0	25.2404	105.497	0.978444	309.667	68	2
131	ko3	27.3	KO	0	25.2404	90.2667	0.919	222.556	69	2
132	ko3	27.3	KO	1	9.9324	84.2917	0.844222	135.111	46	2
133	ko3	27.3	KO	1	10.3596	77.4694	0.787778	90.2222	47	2
134	ko3	27.3	KO	1	10.3596	74.6806	0.806444	47.4444	48	2
135	ko3	27.3	KO	1	10.3596	82.9125	0.795875	95.75	49	2
136	ko3	27.3	KO	1	10.7868	87.0278	0.777333	261.889	50	2
137	ko3	27.3	KO	1	10.7868	69.5389	0.769	3.88889	51	2
138	ko3	27.3	KO	1	10.7868	81.325	0.781	47	52	2
139	ko3	27.3	KO	1	10.7868	67.9361	0.785	1.44444	53	2
140	ko3	27.3	KO	1	10.7868	87.6028	0.818889	53.3333	54	2
141	ko3	27.3	KO	1	10.9648	68.0694	0.831889	2.22222	55	2
142	ko3	27.3	KO	1	11.1072	98.9861	0.866444	109.667	56	2
143	ko3	27.3	KO	1	12.0684	86.6528	0.924889	43.1111	57	2
144	ko3	27.3	KO	1	25.2404	83.2333	0.871	72.6667	70	3
145	ko4	26.2	KO	0	3.916	109.219	0.941111	206.778	34	1
146	ko4	26.2	KO	0	4.7348	109.314	0.924556	237.556	35	1
147	ko4	26.2	KO	0	5.2688	98.6472	0.953222	126.667	36	1
148	ko4	26.2	KO	0	6.3368	116.703	0.976333	588.667	37	1
149	ko4	26.2	KO	0	6.9064	101.612	0.970125	173.375	38	1
150	ko4	26.2	KO	0	7.9744	107.475	0.982111	244.444	39	1
151	ko4	26.2	KO	0	9.078	83.4583	0.939111	14	40	1
152	ko4	26.2	KO	0	9.2204	98.2861	0.952	143.222	41	1
153	ko4	26.2	KO	0	9.6476	98.3056	0.917778	158	42	1
154	ko4	26.2	KO	0	9.6476	86.1556	0.854222	40.3333	43	1
155	ko4	26.2	KO	0	9.6476	95.7472	0.851889	204.111	44	1
156	ko4	26.2	KO	0	9.9324	89.1361	0.843889	66.1111	45	1
157	ko4	26.2	KO	1	0	83.8444	0.836556	14.6667	23	1
158	ko4	26.2	KO	1	0.4272	103.25	0.857111	158.667	24	1
159	ko4	26.2	KO	1	1.8156	90.0694	0.824667	32.7778	25	1
160	ko4	26.2	KO	1	1.8156	88.9333	0.870667	44	26	1
161	ko4	26.2	KO	1	1.8156	93.8111	0.870111	143.222	27	1
162	ko4	26.2	KO	1	1.8156	81.9472	0.840222	22.8889	28	1
163	ko4	26.2	KO	1	1.8156	78.8844	0.880375	9	29	1
164	ko4	26.2	KO	1	1.9936	98.2917	0.910778	178.444	30	1
165	ko4	26.2	KO	1	2.314	82.3111	0.847778	17.1111	31	1
166	ko4	26.2	KO	1	3.916	87.0778	0.893111	37.4444	32	1
167	ko4	26.2	KO	1	3.916	85.0694	0.892889	15.8889	33	1
168	ko4	26.2	KO	0	15.5572	108.325	0.936778	166.889	58	2
169	ko4	26.2	KO	0	17.266	105.725	0.955778	304.222	59	2
170	ko4	26.2	KO	0	18.5832	105.006	0.984889	296.111	60	2
171	ko4	26.2	KO	0	19.2952	108.394	1.00278	405.556	61	2
172	ko4	26.2	KO	0	20.3632	98.7611	1.00144	200.222	62	2
173	ko4	26.2	KO	0	21.7872	106.583	1.01589	361.667	63	2
174	ko4	26.2	KO	0	22.0008	96.3306	0.983667	112	64	2
175	ko4	26.2	KO	0	23.0688	103.112	1.00275	331.875	65	2
176	ko4	26.2	KO	0	23.6384	87.5222	0.978889	65.6667	66	2
177	ko4	26.2	KO	0	24.4216	99.4861	0.984889	242.444	67	2
178	ko4	26.2	KO	0	26.2728	87.8472	0.988444	57.3333	68	2
179	ko4	26.2	KO	0	26.522	94.9389	0.986222	340.222	69	2
180	ko4	26.2	KO	1	9.9324	74.5139	0.800444	10.5556	46	2
181	ko4	26.2	KO	1	10.7868	102.141	0.840875	206	47	2
182	ko4	26.2	KO	1	10.7868	77.7833	0.805556	14.1111	48	2
183	ko4	26.2	KO	1	11.6056	80.425	0.859333	35	49	2
184	ko4	26.2	KO	1	11.6056	88.7556	0.829222	128.667	50	2
185	ko4	26.2	KO	1	11.926	77.725	0.793444	19.4444	51	2
186	ko4	26.2	KO	1	12.4956	91.6139	0.826667	171.667	52	2
187	ko4	26.2	KO	1	12.994	80.6556	0.818	39.4444	53	2
188	ko4	26.2	KO	1	12.994	76.4611	0.861778	14.6667	54	2
189	ko4	26.2	KO	1	13.2076	87.3528	0.885778	39.6667	55	2
190	ko4	26.2	KO	1	14.3468	83.5781	0.93	26.25	56	2
191	ko4	26.2	KO	1	14.6316	83.9167	0.921556	31.6667	57	2
192	ko4	26.2	KO	1	26.522	71.6167	0.887667	18.3333	70	3
193	wt1	28	WT	0	4.3076	113.867	0.930778	270.889	34	1
194	wt1	28	WT	0	5.7672	114.692	0.970556	304.111	35	1
195	wt1	28	WT	0	7.2268	112.531	0.983125	323.625	36	1
196	wt1	28	WT	0	7.4048	112.358	0.984444	520.556	37	1
197	wt1	28	WT	0	8.1524	111.975	0.962778	275	38	1
198	wt1	28	WT	0	8.1524	89.5833	0.930111	31.1111	39	1
199	wt1	28	WT	0	10.0036	105.894	0.966222	220.889	40	1
200	wt1	28	WT	0	10.0036	89.1361	0.938889	18.2222	41	1
201	wt1	28	WT	0	10.0036	93.875	0.919444	131.222	42	1
202	wt1	28	WT	0	10.0036	87.1111	0.893667	68.4444	43	1
203	wt1	28	WT	0	11.392	104.044	0.927556	175.444	44	1
204	wt1	28	WT	0	12.104	98.9969	0.9485	184.75	45	1
205	wt1	28	WT	1	0.4984	93.5722	0.879111	74.3333	23	1
206	wt1	28	WT	1	0.4984	82.9167	0.848889	14.1111	24	1
207	wt1	28	WT	1	1.2816	110.567	0.917444	182.222	25	1
208	wt1	28	WT	1	1.2816	81.8917	0.851	2.88889	26	1
209	wt1	28	WT	1	1.6732	85.25	0.84725	16.375	27	1
210	wt1	28	WT	1	1.6732	87.8167	0.861444	29.1111	28	1
211	wt1	28	WT	1	1.6732	78.725	0.821111	14.2222	29	1
212	wt1	28	WT	1	2.0648	84.6	0.8	30	30	1
213	wt1	28	WT	1	2.2072	78.9417	0.857333	9.44444	31	1
214	wt1	28	WT	1	2.67	80.7944	0.889889	13.5556	32	1
215	wt1	28	WT	1	3.026	90.3583	0.900444	34.3333	33	1
216	wt1	28	WT	0	17.088	112.183	0.968333	387.444	58	2
217	wt1	28	WT	0	18.4408	120.936	0.987889	545.556	59	2
218	wt1	28	WT	0	19.936	116.775	0.996111	447.333	60	2
219	wt1	28	WT	0	20.0784	109.811	0.999889	354.556	61	2
220	wt1	28	WT	0	21.0752	101.189	0.957	311	62	2
221	wt1	28	WT	0	21.5736	88.0375	0.946	47.875	63	2
222	wt1	28	WT	0	22.3924	92.9806	0.918	43.7778	64	2
223	wt1	28	WT	0	23.674	111.133	0.98	446.556	65	2
224	wt1	28	WT	0	23.9588	93.2667	0.940778	41.4444	66	2
225	wt1	28	WT	0	24.3148	91.7389	0.945222	17.6667	67	2
226	wt1	28	WT	0	25.5964	103.85	0.961889	211.333	68	2
227	wt1	28	WT	0	26.4508	109.347	0.982	396.778	69	2
228	wt1	28	WT	1	12.46	105	0.942778	281.667	46	2
229	wt1	28	WT	1	12.46	79.0083	0.868222	1.22222	47	2
230	wt1	28	WT	1	12.46	83.6306	0.846667	52.3333	48	2
231	wt1	28	WT	1	12.46	71.1722	0.826222	3	49	2
232	wt1	28	WT	1	12.7448	94.9667	0.833	75.3333	50	2
233	wt1	28	WT	1	12.8516	78.5611	0.804778	8.77778	51	2
234	wt1	28	WT	1	13.172	83.675	0.848222	38	52	2
235	wt1	28	WT	1	13.4568	83.5583	0.859444	31.3333	53	2
236	wt1	28	WT	1	14.1332	84.4344	0.855375	60.5	54	2
237	wt1	28	WT	1	14.1332	81.4778	0.881	18.1111	55	2
238	wt1	28	WT	1	14.9876	84.4833	0.899778	20.2222	56	2
239	wt1	28	WT	1	15.7352	89.9306	0.916667	61.8889	57	2
240	wt1	28	WT	1	26.4508	79.1139	0.870889	13	70	3
241	wt2	26.7	WT	0	4.2008	116.675	0.953125	356.25	34	1
242	wt2	26.7	WT	0	4.806	101.567	0.982556	145.333	35	1
243	wt2	26.7	WT	0	5.6604	117.931	0.998556	365.667	36	1
244	wt2	26.7	WT	0	6.2656	93.1472	0.975444	79	37	1
245	wt2	26.7	WT	0	6.7284	112.956	0.983556	317.778	38	1
246	wt2	26.7	WT	0	7.2268	88.1861	0.927	91.5556	39	1
247	wt2	26.7	WT	0	7.2268	86.8306	0.936	54.2222	40	1
248	wt2	26.7	WT	0	8.9712	102.569	0.951444	254.222	41	1
249	wt2	26.7	WT	0	8.9712	88.8639	0.924333	27.2222	42	1
250	wt2	26.7	WT	0	8.9712	85.0312	0.909	34.875	43	1
251	wt2	26.7	WT	0	9.79	107.558	0.895667	316.222	44	1
252	wt2	26.7	WT	0	9.79	84.1167	0.827111	54.7778	45	1
253	wt2	26.7	WT	1	0	95.8583	0.847	144.444	23	1
254	wt2	26.7	WT	1	0	73.9472	0.89	3.88889	24	1
255	wt2	26.7	WT	1	0	83.4062	0.85375	18	25	1
256	wt2	26.7	WT	1	0.6764	98.9056	0.860444	163	26	1
257	wt2	26.7	WT	1	0.9256	80.2778	0.885333	14.5556	27	1
258	wt2	26.7	WT	1	1.1748	96.2	0.892889	105.778	28	1
259	wt2	26.7	WT	1	1.3528	87.3306	0.867333	34	29	1
260	wt2	26.7	WT	1	1.3528	76.1222	0.892333	8.22222	30	1
261	wt2	26.7	WT	1	1.602	81.8139	0.932778	15.5556	31	1
262	wt2	26.7	WT	1	2.4208	87.1333	0.908	59.1111	32	1
263	wt2	26.7	WT	1	2.848	86.8972	0.920667	25.6667	33	1
264	wt2	26.7	WT	0	18.69	121.503	0.974778	494.222	58	2
265	wt2	26.7	WT	0	20.0072	113.475	0.970111	312.222	59	2
266	wt2	26.7	WT	0	20.826	99.375	0.954222	126.556	60	2
267	wt2	26.7	WT	0	21.716	117.428	0.996	334.125	61	2
268	wt2	26.7	WT	0	22.428	98.0667	0.957556	95.1111	62	2
269	wt2	26.7	WT	0	23.3892	97.7194	0.975556	53.4444	63	2
270	wt2	26.7	WT	0	24.7064	87.6139	0.986778	35.7778	64	2
271	wt2	26.7	WT	0	25.9168	114.45	0.999444	387	65	2
272	wt2	26.7	WT	0	26.1304	88.3472	0.958889	21	66	2
273	wt2	26.7	WT	0	27.768	107.931	0.967111	268.444	67	2
274	wt2	26.7	WT	0	27.768	89.5833	0.935556	20.8889	68	2
275	wt2	26.7	WT	0	28.3376	102.781	0.933	224.444	69	2
276	wt2	26.7	WT	1	10.1816	88.6333	0.848889	70.7778	46	2
277	wt2	26.7	WT	1	10.7868	84.9528	0.863	53.1111	47	2
278	wt2	26.7	WT	1	11.1072	80.5806	0.846444	57	48	2
279	wt2	26.7	WT	1	11.3564	79.8222	0.831778	25	49	2
280	wt2	26.7	WT	1	12.6736	82.9528	0.830111	25.7778	50	2
281	wt2	26.7	WT	1	13.0296	85.1333	0.875111	108.667	51	2
282	wt2	26.7	WT	1	13.4212	77.7406	0.862625	10.625	52	2
283	wt2	26.7	WT	1	13.9196	79.3861	0.882222	30.6667	53	2
284	wt2	26.7	WT	1	14.6672	77.9611	0.925111	28.6667	54	2
285	wt2	26.7	WT	1	15.7352	86.8639	0.925333	38.8889	55	2
286	wt2	26.7	WT	1	17.088	85.9389	0.970667	26.1111	56	2
287	wt2	26.7	WT	1	17.5152	85.4167	1	26.6667	57	2
288	wt2	26.7	WT	1	28.4444	88.2687	0.830125	83.125	70	3
289	wt3	27.7	WT	0	1.78	88.0306	0.812889	174	34	1
290	wt3	27.7	WT	0	2.2784	118.008	0.918222	526.667	35	1
291	wt3	27.7	WT	0	3.7736	116.533	0.944111	481.889	36	1
292	wt3	27.7	WT	0	3.7736	92.1639	0.938222	208.778	37	1
293	wt3	27.7	WT	0	4.984	91.7083	0.929889	199.333	38	1
294	wt3	27.7	WT	0	6.6928	111.331	0.961111	516.667	39	1
295	wt3	27.7	WT	0	7.12	101.844	0.948	418.889	40	1
296	wt3	27.7	WT	0	7.12	73.2188	0.904125	21.25	41	1
297	wt3	27.7	WT	0	8.2236	97.95	0.925111	297.444	42	1
298	wt3	27.7	WT	0	8.3304	85.4222	0.915889	118.222	43	1
299	wt3	27.7	WT	0	10.9292	97.8222	0.902111	262.111	44	1
300	wt3	27.7	WT	0	11.3208	106.381	0.925778	421.222	45	1
301	wt3	27.7	WT	1	0	86.8125	0.79875	72.625	23	1
302	wt3	27.7	WT	1	0	77.2111	0.801333	50.8889	24	1
303	wt3	27.7	WT	1	0	75.3167	0.766889	7.33333	25	1
304	wt3	27.7	WT	1	0.4628	102.003	0.816889	223.556	26	1
305	wt3	27.7	WT	1	0.4628	69.3583	0.807889	5.77778	27	1
306	wt3	27.7	WT	1	0.8544	78.5417	0.805556	43.1111	28	1
307	wt3	27.7	WT	1	0.8544	69.0806	0.813333	10.1111	29	1
308	wt3	27.7	WT	1	0.8544	71.1972	0.807111	27.4444	30	1
309	wt3	27.7	WT	1	0.8544	77.5083	0.787889	69.8889	31	1
310	wt3	27.7	WT	1	0.8544	69.8187	0.777	21.5	32	1
311	wt3	27.7	WT	1	0.8544	82.275	0.781778	75	33	1
312	wt3	27.7	WT	0	12.1752	102.092	0.846889	267.889	58	2
313	wt3	27.7	WT	0	12.994	98.0094	0.892	324.25	59	2
314	wt3	27.7	WT	0	14.3468	108.067	0.946111	360.222	60	2
315	wt3	27.7	WT	0	14.5604	89.4917	0.951222	162.222	61	2
316	wt3	27.7	WT	0	15.2724	97.6306	0.947	220.778	62	2
317	wt3	27.7	WT	0	16.3404	117.581	0.937222	375.556	63	2
318	wt3	27.7	WT	0	16.6252	106.772	0.913111	436.111	64	2
319	wt3	27.7	WT	0	16.6252	68.4194	0.815778	2.33333	65	2
320	wt3	27.7	WT	0	17.3728	107.381	0.844222	428.444	66	2
321	wt3	27.7	WT	0	17.3728	76.3944	0.800778	117.111	67	2
322	wt3	27.7	WT	0	18.6188	112.153	0.870875	345.75	68	2
323	wt3	27.7	WT	0	18.868	92.8472	0.903222	323.111	69	2
324	wt3	27.7	WT	1	11.3208	79.0722	0.884444	92.4444	46	2
325	wt3	27.7	WT	1	11.3208	87.6222	0.871556	159.778	47	2
326	wt3	27.7	WT	1	11.3208	77.475	0.884222	32.4444	48	2
327	wt3	27.7	WT	1	11.3208	79.6361	0.842556	79.7778	49	2
328	wt3	27.7	WT	1	11.3208	80.7375	0.80925	86.75	50	2
329	wt3	27.7	WT	1	11.3208	69.9583	0.785667	4.88889	51	2
330	wt3	27.7	WT	1	11.6056	89.5417	0.812	83.6667	52	2
331	wt3	27.7	WT	1	11.6056	68.25	0.793778	6.44444	53	2
332	wt3	27.7	WT	1	11.6056	74.8833	0.790667	28.4444	54	2
333	wt3	27.7	WT	1	11.6056	65.2917	0.790444	3.55556	55	2
334	wt3	27.7	WT	1	11.6056	83.9111	0.811667	73.8889	56	2
335	wt3	27.7	WT	1	11.6056	75.0722	0.803444	42.6667	57	2
336	wt3	27.7	WT	1	19.0104	62.9833	0.814444	3.44444	70	3
337	wt4	26.6	WT	0	3.8092	107.992	0.980667	123.333	34	1
338	wt4	26.6	WT	0	5.34	117.85	0.996111	337.222	35	1
339	wt4	26.6	WT	0	6.8352	113.614	1.00111	144.222	36	1
340	wt4	26.6	WT	0	7.2268	118.439	1.01233	427.222	37	1
341	wt4	26.6	WT	0	8.9356	121.789	0.983556	369.556	38	1
342	wt4	26.6	WT	0	8.9356	112.303	0.946	142.5	39	1
343	wt4	26.6	WT	0	8.9356	98.9806	0.906667	53.6667	40	1
344	wt4	26.6	WT	0	10.7156	113.192	0.943556	229.889	41	1
345	wt4	26.6	WT	0	10.7156	94.0028	0.935778	38.1111	42	1
346	wt4	26.6	WT	0	11.2496	113.314	0.931556	145.889	43	1
347	wt4	26.6	WT	0	11.926	103.725	0.905	183.556	44	1
348	wt4	26.6	WT	0	12.2108	108.611	0.862778	319.222	45	1
349	wt4	26.6	WT	1	0	92.1972	0.798667	2.22222	23	1
350	wt4	26.6	WT	1	0.1424	103.767	0.796556	80.1111	24	1
351	wt4	26.6	WT	1	0.4984	111.978	0.88	92.1111	25	1
352	wt4	26.6	WT	1	0.4984	89.1861	0.831	11.3333	26	1
353	wt4	26.6	WT	1	0.9612	100.528	0.847889	99.6667	27	1
354	wt4	26.6	WT	1	0.9612	84.525	0.801444	1.22222	28	1
355	wt4	26.6	WT	1	1.3884	98.0389	0.867667	96.6667	29	1
356	wt4	26.6	WT	1	1.5664	97.9625	0.87975	18.375	30	1
357	wt4	26.6	WT	1	1.5664	85.6389	0.884222	2.77778	31	1
358	wt4	26.6	WT	1	2.2784	95.7139	0.909889	22.1111	32	1
359	wt4	26.6	WT	1	3.4888	98.4944	0.904	21.6667	33	1
360	wt4	26.6	WT	0	17.3016	123.736	0.950111	306.444	58	2
361	wt4	26.6	WT	0	18.4764	108.436	0.990556	147.222	59	2
362	wt4	26.6	WT	0	20.1852	112.619	1.009	180.111	60	2
363	wt4	26.6	WT	0	21.894	116.947	1.02233	204.111	61	2
364	wt4	26.6	WT	0	23.14	117.325	1.01878	263.556	62	2
365	wt4	26.6	WT	0	23.2468	91.4444	1.01244	50.5556	63	2
366	wt4	26.6	WT	0	24.7064	100.228	1.02044	74.2222	64	2
367	wt4	26.6	WT	0	26.3796	113.533	1.03611	249.111	65	2
368	wt4	26.6	WT	0	26.3796	105.834	1.0045	125	66	2
369	wt4	26.6	WT	0	28.2308	99.1694	1.022	61.8889	67	2
370	wt4	26.6	WT	0	28.4444	109.839	1.011	199.556	68	2
371	wt4	26.6	WT	0	29.9396	102.981	0.994444	144.889	69	2
372	wt4	26.6	WT	1	12.2108	89.8722	0.777	24.1111	46	2
373	wt4	26.6	WT	1	12.5668	85.5556	0.780111	41.1111	47	2
374	wt4	26.6	WT	1	12.5668	88.05	0.779125	49.625	48	2
375	wt4	26.6	WT	1	12.5668	84.4111	0.801444	36.8889	49	2
376	wt4	26.6	WT	1	12.7448	86.9889	0.812667	16.7778	50	2
377	wt4	26.6	WT	1	14.3112	103.453	0.849556	118.111	51	2
378	wt4	26.6	WT	1	14.418	83.3861	0.936778	13.4444	52	2
379	wt4	26.6	WT	1	15.0588	91.1611	0.907444	42.8889	53	2
380	wt4	26.6	WT	1	15.0588	88.1889	0.907889	41.5556	54	2
381	wt4	26.6	WT	1	15.2724	91.0639	0.889111	47.8889	55	2
382	wt4	26.6	WT	1	15.7352	87.3611	0.911222	16.4444	56	2
383	wt4	26.6	WT	1	15.9844	96.5719	0.903625	24.875	57	2
384	wt4	26.6	WT	1	29.9396	97.0417	0.956444	96.5556	70	3
Figure 5F
Complex V
WT fed	KO fed	WT fasted	KO fasted
1.28466	0.357347	1.01927	1.89694
0.936415	0.787322	1.22578	1.24729
0.778925	0.651675	1.70244	1.2341
		Significance	P value
WT fed vs. KO fed		ns	0.5462
WT fed vs. WT fasted		ns	0.7046
WT fed vs. KO fasted		ns	0.4465
KO fed vs. WT fasted		ns	0.1592
KO fed vs. KO fasted		ns	0.0873
WT fasted vs. KO fasted		ns	0.9565
Complex III
WT fed	KO fed	WT fasted	KO fasted
1.17617	0.359016	1.27727	2.05323
0.724696	0.790731	1.13163	0.732543
1.09913	0.579614	2.07194	0.75001
		Significance	P value
WT fed vs. KO fed		ns	0.7481
WT fed vs. WT fasted		ns	0.6585
WT fed vs. KO fasted		ns	0.9716
KO fed vs. WT fasted		ns	0.2263
KO fed vs. KO fasted		ns	0.5211
WT fasted vs. KO fasted		ns	0.8719
Complex IV
WT fed	KO fed	WT fasted	KO fasted
0.644793	0.896007	1.01643	1.4448
0.983183	0.393773	1.43913	1.38446
1.37202	0.718833	1.53857	0.0805282
		Significance	P value
WT fed vs. KO fed		ns	0.8699
WT fed vs. WT fasted		ns	0.869
WT fed vs. KO fasted		ns	0.9999
KO fed vs. WT fasted		ns	0.4821
KO fed vs. KO fasted		ns	0.8974
WT fasted vs. KO fasted		ns	0.8388
Complex II
WT fed	KO fed	WT fasted	KO fasted
0.628859	1.33989	1.09431	2.0925
1.05222	0.863139	1.16496	1.77126
1.31893	0.924976	1.73902	0.575129
		Significance	P value
WT fed vs. KO fed		ns	0.9997
WT fed vs. WT fasted		ns	0.881
WT fed vs. KO fasted		ns	0.7267
KO fed vs. WT fasted		ns	0.916
KO fed vs. KO fasted		ns	0.7754
WT fasted vs. KO fasted		ns	0.9872
Complex I
WT fed	KO fed	WT fasted	KO fasted
0.698962	0.919646	1.25139	2.08662
0.985096	0.813974	1.99268	1.97901
1.31594	0.845783	2.37351	0.557831
		Significance	P value
WT fed vs. KO fed		ns	0.9913
WT fed vs. WT fasted		ns	0.3735
WT fed vs. KO fasted		ns	0.7067
KO fed vs. WT fasted		ns	0.2707
KO fed vs. KO fasted		ns	0.5552
WT fasted vs. KO fasted		ns	0.9051
Figure 5G
WT	KO
1.10022	0.296582
1.04634	1.05936
0.87006	1.19454
0.920145	1.03912
0.921761	1.3534
1.14147
	Significance	P value
WT vs. KO	ns	0.9485
Figure 5H
	WT fed						KO fed					WT fasted					KO fasted
Myh1	0.936493	0.983125	0.861025	1.01261	1.0564	1.15035	0.311356	1.22014	1.44711	1.28186	1.43204	1.16345	1.36171	1.73531	1.16582	1.20701	0.539006	1.92105	1.43275	1.51531	1.58106
Myh2	1.00126	1.17395	1.02654	0.860735	0.863717	1.0738	0.0709446	0.8191	1.06827	0.746207	1.1943	0.824016	0.828159	1.12911	0.393735	0.69273	0.445331	0.677446	0.846983	0.749159	0.637438
Myh4	0.848426	0.795838	0.769254	0.99923	0.861976	1.72528	0.0230214	0.98317	0.967521	0.907477	1.64778	1.93365	0.927012	0.813309	0.814789	1.43631	0.00628337	0.319671	0.659385	0.317123	0.361967
Myh7	0.966334	1.66593	0.506535	0.784702	1.38324	0.693259	0.377412	0.598488	2.85157	0.527246	1.58283	1.17416	1.74757	2.65721	0.229564	1.94882	1.13922	0.481903	1.2553	0.381371	0.928927
Myh1		Significance	P value
Fed:WT vs. Fed:KO		ns	0.9208
Fed:WT vs. Fasted:WT		ns	0.4663
Fed:WT vs. Fasted:KO		ns	0.3023
Fed:KO vs. Fasted:WT		ns	0.8442
Fed:KO vs. Fasted:KO		ns	0.6765
Fasted:WT vs. Fasted:KO		ns	0.9893
Myh2		Significance	P value
Fed:WT vs. Fed:KO		ns	0.5365
Fed:WT vs. Fasted:WT		ns	0.514
Fed:WT vs. Fasted:KO		ns	0.2133
Fed:KO vs. Fasted:WT		ns	>0.9999
Fed:KO vs. Fasted:KO		ns	0.9162
Fasted:WT vs. Fasted:KO		ns	0.9284
Myh4		Significance	P value
Fed:WT vs. Fed:KO		ns	0.9835
Fed:WT vs. Fasted:WT		ns	0.8933
Fed:WT vs. Fasted:KO		ns	0.088
Fed:KO vs. Fasted:WT		ns	0.74
Fed:KO vs. Fasted:KO		ns	0.1948
Fasted:WT vs. Fasted:KO		*	0.0292
Myh7		Significance	P value
Fed:WT vs. Fed:KO		ns	0.9744
Fed:WT vs. Fasted:WT		ns	0.6147
Fed:WT vs. Fasted:KO		ns	0.9829
Fed:KO vs. Fasted:WT		ns	0.8625
Fed:KO vs. Fasted:KO		ns	0.8753
Fasted:WT vs. Fasted:KO		ns	0.4423
