# Supplementary material for: Phosphoproteomic mapping reveals distinct signaling actions and activation of muscle protein synthesis by Isthmin-1
Source: eLife. 2022 Sep 28;11:e80014. doi: 10.7554/eLife.80014 (PMC9592085; doi:10.7554/eLife.80014)
Supplement: Figure 6—source data 1. [file elife-80014-fig6-data1.xlsx]

## Sheet: Sheet1
Figure 6A
WT	KO
0.984824	0.932771
1.14986	0.818445
0.964367	0.798177
0.964643	0.773103
0.936302	0.798465
0.892694	0.936102
1.04754	0.914238
1.21963	0.994567
0.840137	0.852814
1.00379
0.992222
1.00399
	Significance	P value
WT vs. KO	**	0.0048
Figure 6C
WT	KO
0.717417	1.06396
1.10095	0.992131
0.966602	0.118524
1.02779	0.460459
1.18724	0.465847
0.692726	0.966979
0.977828	0.889791
1.52233	0.988291
0.80712	0.578113
0.930907
1.01566
1.05343
	Significance	P value
WT vs. KO	*	0.0335
Figure 6D
	WT fed						KO fed					WT fasted					KO fasted
Foxo1	1.03982	1.01918	0.763978	1.05393	0.872152	1.25094	1.84373	1.1977	0.82172	2.04972	2.19577	1.83158	3.07431	3.90102	2.98424	2.15943	6.86677	6.00943	3.75098	5.2512	3.89111
Foxo3	0.814732	0.895939	0.838802	1.12115	1.09598	1.2334	0.367613	2.0233	1.29391	2.10468	2.31902	1.89769	3.1196	2.88169	2.05684	1.7561	1.00947	4.19555	3.3356	4.73119	3.38426
Foxo4	0.91114	1.19036	0.905146	0.915039	0.9881	1.09022	0.250252	0.946609	0.912747	1.1979	1.13824	1.28253	1.53802	1.40332	1.07936	1.02071	0.323814	1.06494	1.47867	0.913883	1.1785
Foxo1		Significance	P value
Fed:WT vs. Fed:KO		ns	0.6038
Fed:WT vs. Fasted:WT		*	0.0106
Fed:WT vs. Fasted:KO		***	<0.0001
Fed:KO vs. Fasted:WT		ns	0.1489
Fed:KO vs. Fasted:KO		***	<0.0001
Fasted:WT vs. Fasted:KO		**	0.0014
Foxo3		Significance	P value
Fed:WT vs. Fed:KO		ns	0.6317
Fed:WT vs. Fasted:WT		ns	0.0791
Fed:WT vs. Fasted:KO		**	0.0016
Fed:KO vs. Fasted:WT		ns	0.5526
Fed:KO vs. Fasted:KO		*	0.0258
Fasted:WT vs. Fasted:KO		ns	0.2914
Foxo4		Significance	P value
Fed:WT vs. Fed:KO		ns	0.929
Fed:WT vs. Fasted:WT		ns	0.4899
Fed:WT vs. Fasted:KO		ns	>0.9999
Fed:KO vs. Fasted:WT		ns	0.2401
Fed:KO vs. Fasted:KO		ns	0.9487
Fasted:WT vs. Fasted:KO		ns	0.5011
Figure 6E
	WT fed						KO fed					WT fasted					KO fasted
Cdkn1b	0.929146	1.02517	0.719307	1.0259	1.06746	1.23302	1.91538	1.77537	1.05662	1.46786	1.73601	1.76147	1.97282	1.62009	1.52385	1.12649	5.2329	2.85438	2.44603	2.57056	1.79582
Eif4ebp1	0.925277	0.981999	0.722978	1.17729	1.01401	1.17844	2.06458	2.02949	1.38398	2.2481	2.41302	2.40682	3.942	2.55617	2.77541	2.10876	7.1514	5.83862	4.54543	5.92921	5.07417
Ctsl	0.951439	0.89499	0.669878	1.18946	1.13785	1.15638	0.759736	1.25472	1.1852	1.45741	1.39541	1.42622	2.23268	1.76866	1.71824	1.46659	3.26492	1.9304	2.28985	2.11672	3.04699
Cdkn1b		Significance	P value
Fed:WT vs. Fed:KO		ns	0.5013
Fed:WT vs. Fasted:WT		ns	0.4864
Fed:WT vs. Fasted:KO		***	0.0009
Fed:KO vs. Fasted:WT		ns	>0.9999
Fed:KO vs. Fasted:KO		*	0.0238
Fasted:WT vs. Fasted:KO		*	0.025
Eif4ebp1		Significance	P value
Fed:WT vs. Fed:KO		ns	0.0641
Fed:WT vs. Fasted:WT		**	0.0012
Fed:WT vs. Fasted:KO		***	<0.0001
Fed:KO vs. Fasted:WT		ns	0.2873
Fed:KO vs. Fasted:KO		***	<0.0001
Fasted:WT vs. Fasted:KO		***	<0.0001
Ctsl		Significance	P value
Fed:WT vs. Fed:KO		ns	0.7829
Fed:WT vs. Fasted:WT		*	0.0229
Fed:WT vs. Fasted:KO		***	<0.0001
Fed:KO vs. Fasted:WT		ns	0.1647
Fed:KO vs. Fasted:KO		***	0.0002
Fasted:WT vs. Fasted:KO		*	0.0144
Figure 6F
	WT			KO
Fed	0.660787	0.870509	1.4687	2.92746	3.88086	4.35514
Fasted	2.07971	3.55031	2.13325	3.51993	3.53806	3.77292
		Significance	P value
Fed:WT vs. Fed:KO		**	0.0023
Fed:WT vs. Fasted:WT		*	0.0459
Fed:WT vs. Fasted:KO		**	0.003
Fed:KO vs. Fasted:WT		ns	0.17
Fed:KO vs. Fasted:KO		ns	0.9955
Fasted:WT vs. Fasted:KO		ns	0.2311
Figure 6G
p-AKT S473	WT			KO
Fed	0.856211	1.33258	0.811209	0.215506	0.267117	0.692381
Fasted	0.109258	0.470847	0.33728	0.108929	0.480969	0.0906337
		Significance	P value
Fed:WT vs. Fed:KO		ns	0.0872
Fed:WT vs. Fasted:WT		*	0.0464
Fed:WT vs. Fasted:KO		*	0.0264
Fed:KO vs. Fasted:WT		ns	0.9988
Fed:KO vs. Fasted:KO		ns	0.965
Fasted:WT vs. Fasted:KO		ns	0.9993
p-mTOR S2448	WT			KO
Fed	1.01569	1.13795	0.846363	0.267172	0.181031	0.423751
Fasted	0.653295	0.616901	0.596014	0.440141	0.863983	0.440266
		Significance	P value
Fed:WT vs. Fed:KO		**	0.0024
Fed:WT vs. Fasted:WT		ns	0.0696
Fed:WT vs. Fasted:KO		*	0.0444
Fed:KO vs. Fasted:WT		ns	0.1165
Fed:KO vs. Fasted:KO		ns	0.181
Fasted:WT vs. Fasted:KO		ns	0.9879
p-S6 S235/236	WT			KO
Fed	1.75598	0.0853354	1.15869	-0.0181675	0.271985	0.362283
Fasted	0.340051	0.0958761	0.144005	0.0600719	0.0389788	0.0204011
		Significance	P value
Fed:WT vs. Fed:KO		ns	0.1991
Fed:WT vs. Fasted:WT		ns	0.1903
Fed:WT vs. Fasted:KO		ns	0.1053
Fed:KO vs. Fasted:WT		ns	>0.9999
Fed:KO vs. Fasted:KO		ns	0.9655
Fasted:WT vs. Fasted:KO		ns	0.9721
total AKT	WT			KO
Fed	1.26029	0.951216	0.788495	0.710848	0.387544	0.836139
Fasted	0.883639	1.08257	1.15527	0.841418	1.57727	0.837461
		Significance	P value
Fed:WT vs. Fed:KO		ns	0.4512
Fed:WT vs. Fasted:WT		ns	0.9978
Fed:WT vs. Fasted:KO		ns	0.9809
Fed:KO vs. Fasted:WT		ns	0.3677
Fed:KO vs. Fasted:KO		ns	0.2884
Fasted:WT vs. Fasted:KO		ns	0.9971
total mTOR	WT			KO
Fed	0.965906	1.09057	0.943527	0.637822	0.649832	0.877786
Fasted	0.979845	1.2697	1.03054	0.695745	1.02737	0.242438
		Significance	P value
Fed:WT vs. Fed:KO		ns	0.4752
Fed:WT vs. Fasted:WT		ns	0.9552
Fed:WT vs. Fasted:KO		ns	0.3111
Fed:KO vs. Fasted:WT		ns	0.2586
Fed:KO vs. Fasted:KO		ns	0.9827
Fasted:WT vs. Fasted:KO		ns	0.1592
total S6	WT			KO
Fed	78.7622	84.9861	71.7126	56.2949	54.2436	64.2027
Fasted	52.9793	66.5248	72.1725	49.1265	53.9677	26.2949
		Significance	P value
Fed:WT vs. Fed:KO		ns	0.131
Fed:WT vs. Fasted:WT		ns	0.333
Fed:WT vs. Fasted:KO		**	0.0098
Fed:KO vs. Fasted:WT		ns	0.8933
Fed:KO vs. Fasted:KO		ns	0.3072
Fasted:WT vs. Fasted:KO		ns	0.1196
